# Supplementary material for: Dual checkpoint blockade of CD47 and PD-L1 using an affinity-tuned bispecific antibody maximizes antitumor immunity
Source: HighWire-hosted journal article supplement (doi:10.1136/jitc-2021-003464), 2021-10-01
Supplement: jitc-2021-003464supp005_data_supplement.xlsx [file jitc-2021-003464supp005_data_supplement.xlsx]

## Sheet: Sheet1
GO.ID	Term	Annotated	Significant	Expected	Rank in Fisher.classic	Fisher.elim	Fisher.classic	Sig.Gene	comparison	cluster
GO:0046597	negative regulation of viral entry into host cell	18	1	0	3	0.0025	0.0025	Ifitm1	CD47.vs.Control	1
GO:0035455	response to interferon-alpha	22	1	0	4	0.003	0.003	Ifitm1	CD47.vs.Control	1
GO:0060337	type I interferon signaling pathway	31	1	0	6	0.0043	0.0043	Ifitm1	CD47.vs.Control	1
GO:0006958	complement activation, classical pathway	36	1	0	8	0.005	0.005	C1qa	CD47.vs.Control	1
GO:0045071	negative regulation of viral genome replication	45	1	0.01	12	0.0062	0.0062	Ifitm1	CD47.vs.Control	1
GO:0035456	response to interferon-beta	50	1	0.01	15	0.0069	0.0069	Ifitm1	CD47.vs.Control	1
GO:0001756	somitogenesis	58	1	0.01	21	0.008	0.008	Ifitm1	CD47.vs.Control	1
GO:0034341	response to interferon-gamma	123	1	0.02	33	0.0169	0.0169	Ifitm1	CD47.vs.Control	1
GO:0051607	defense response to virus	188	1	0.03	41	0.0258	0.0258	Ifitm1	CD47.vs.Control	1
GO:0009615	response to virus	229	1	0.03	42	0.0314	0.0314	Ifitm1	CD47.vs.Control	1
GO:0045087	innate immune response	556	2	0.08	1	0.0363	0.0015	C1qa / Ifitm1	CD47.vs.Control	1
GO:0001503	ossification	291	1	0.04	49	0.0398	0.0398	Ifitm1	CD47.vs.Control	1
GO:0002252	immune effector process	617	2	0.09	2	0.0402	0.0018	C1qa / Ifitm1	CD47.vs.Control	1
GO:0098542	defense response to other organism	381	1	0.05	57	0.0519	0.0519	Ifitm1	CD47.vs.Control	1
GO:0006952	defense response	1095	2	0.15	10	0.0737	0.0057	C1qa / Ifitm1	CD47.vs.Control	1
GO:0051707	response to other organism	696	1	0.1	64	0.0938	0.0938	Ifitm1	CD47.vs.Control	1
GO:0043207	response to external biotic stimulus	697	1	0.1	65	0.094	0.094	Ifitm1	CD47.vs.Control	1
GO:0009607	response to biotic stimulus	728	1	0.1	66	0.098	0.098	Ifitm1	CD47.vs.Control	1
GO:0006950	response to stress	2807	2	0.39	48	0.1922	0.0376	C1qa / Ifitm1	CD47.vs.Control	1
GO:0009605	response to external stimulus	1643	1	0.23	75	0.2141	0.2141	Ifitm1	CD47.vs.Control	1
GO:1901564	organonitrogen compound metabolic process	4957	1	0.68	95	1	0.5676	C1qa	CD47.vs.Control	1
GO:0071345	cellular response to cytokine stimulus	588	1	0.08	59	1	0.0796	Ifitm1	CD47.vs.Control	1
GO:0048583	regulation of response to stimulus	2989	1	0.41	85	1	0.3703	C1qa	CD47.vs.Control	1
GO:0010033	response to organic substance	2091	1	0.29	79	1	0.268	Ifitm1	CD47.vs.Control	1
GO:0019079	viral genome replication	91	1	0.01	28	1	0.0125	Ifitm1	CD47.vs.Control	1
GO:0048584	positive regulation of response to stimulus	1736	1	0.24	77	1	0.2255	C1qa	CD47.vs.Control	1
GO:0044403	symbiont process	315	1	0.04	50	1	0.043	Ifitm1	CD47.vs.Control	1
GO:0050896	response to stimulus	6001	2	0.83	72	1	0.1718	C1qa / Ifitm1	CD47.vs.Control	1
GO:0034340	response to type I interferon	37	1	0.01	9	1	0.0051	Ifitm1	CD47.vs.Control	1
GO:0044409	entry into host	50	1	0.01	16	1	0.0069	Ifitm1	CD47.vs.Control	1
GO:0032501	multicellular organismal process	5090	1	0.7	97	1	0.5796	Ifitm1	CD47.vs.Control	1
GO:0070887	cellular response to chemical stimulus	2102	1	0.29	81	1	0.2693	Ifitm1	CD47.vs.Control	1
GO:0051716	cellular response to stimulus	4980	1	0.69	96	1	0.5697	Ifitm1	CD47.vs.Control	1
GO:0032502	developmental process	4568	1	0.63	93	1	0.5315	Ifitm1	CD47.vs.Control	1
GO:0071357	cellular response to type I interferon	31	1	0	7	1	0.0043	Ifitm1	CD47.vs.Control	1
GO:0071704	organic substance metabolic process	7823	1	1.08	102	1	0.7888	C1qa	CD47.vs.Control	1
GO:0065007	biological regulation	8406	2	1.16	83	1	0.3371	C1qa / Ifitm1	CD47.vs.Control	1
GO:0048856	anatomical structure development	4283	1	0.59	92	1	0.5042	Ifitm1	CD47.vs.Control	1
GO:0043170	macromolecule metabolic process	6718	1	0.93	98	1	0.7128	C1qa	CD47.vs.Control	1
GO:0050789	regulation of biological process	7969	2	1.1	82	1	0.303	C1qa / Ifitm1	CD47.vs.Control	1
GO:0044419	interspecies interaction between organisms	330	1	0.05	52	1	0.0451	Ifitm1	CD47.vs.Control	1
GO:0060429	epithelium development	864	1	0.12	68	1	0.1158	Ifitm1	CD47.vs.Control	1
GO:0045069	regulation of viral genome replication	75	1	0.01	25	1	0.0103	Ifitm1	CD47.vs.Control	1
GO:0043009	chordate embryonic development	642	1	0.09	61	1	0.0867	Ifitm1	CD47.vs.Control	1
GO:0009952	anterior/posterior pattern specification	164	1	0.02	38	1	0.0225	Ifitm1	CD47.vs.Control	1
GO:0048646	anatomical structure formation involved in morphogenesis	920	1	0.13	69	1	0.1231	Ifitm1	CD47.vs.Control	1
GO:0002376	immune system process	1950	2	0.27	35	1	0.0181	C1qa / Ifitm1	CD47.vs.Control	1
GO:0009888	tissue development	1437	1	0.2	73	1	0.1887	Ifitm1	CD47.vs.Control	1
GO:0048525	negative regulation of viral process	79	1	0.01	26	1	0.0109	Ifitm1	CD47.vs.Control	1
GO:0050792	regulation of viral process	154	1	0.02	37	1	0.0212	Ifitm1	CD47.vs.Control	1
GO:0050794	regulation of cellular process	7484	1	1.03	100	1	0.7667	Ifitm1	CD47.vs.Control	1
GO:0050776	regulation of immune response	633	1	0.09	60	1	0.0855	C1qa	CD47.vs.Control	1
GO:0009653	anatomical structure morphogenesis	2098	1	0.29	80	1	0.2688	Ifitm1	CD47.vs.Control	1
GO:0019538	protein metabolic process	4270	1	0.59	91	1	0.5029	C1qa	CD47.vs.Control	1
GO:0050778	positive regulation of immune response	511	1	0.07	58	1	0.0694	C1qa	CD47.vs.Control	1
GO:0002460	adaptive immune response based on somatic recombination of immune receptors built from immunoglobulin superfamily domains	264	1	0.04	45	1	0.0361	C1qa	CD47.vs.Control	1
GO:0007165	signal transduction	3822	1	0.53	86	1	0.4583	Ifitm1	CD47.vs.Control	1
GO:0007166	cell surface receptor signaling pathway	1897	1	0.26	78	1	0.2449	Ifitm1	CD47.vs.Control	1
GO:0002443	leukocyte mediated immunity	320	1	0.04	51	1	0.0437	C1qa	CD47.vs.Control	1
GO:0006955	immune response	1110	2	0.15	11	1	0.0059	C1qa / Ifitm1	CD47.vs.Control	1
GO:0006956	complement activation	52	1	0.01	20	1	0.0072	C1qa	CD47.vs.Control	1
GO:0023052	signaling	4123	1	0.57	88	1	0.4885	Ifitm1	CD47.vs.Control	1
GO:0002449	lymphocyte mediated immunity	247	1	0.03	43	1	0.0338	C1qa	CD47.vs.Control	1
GO:0007389	pattern specification process	336	1	0.05	55	1	0.0459	Ifitm1	CD47.vs.Control	1
GO:0006959	humoral immune response	131	1	0.02	34	1	0.018	C1qa	CD47.vs.Control	1
GO:0009987	cellular process	11162	1	1.54	104	1	0.9476	Ifitm1	CD47.vs.Control	1
GO:0043900	regulation of multi-organism process	330	1	0.05	53	1	0.0451	Ifitm1	CD47.vs.Control	1
GO:0043901	negative regulation of multi-organism process	149	1	0.02	36	1	0.0205	Ifitm1	CD47.vs.Control	1
GO:0048518	positive regulation of biological process	4738	1	0.65	94	1	0.5475	C1qa	CD47.vs.Control	1
GO:0043903	regulation of symbiosis, encompassing mutualism through parasitism	185	1	0.03	40	1	0.0254	Ifitm1	CD47.vs.Control	1
GO:0048519	negative regulation of biological process	4208	1	0.58	90	1	0.4969	Ifitm1	CD47.vs.Control	1
GO:0007275	multicellular organism development	3928	1	0.54	87	1	0.469	Ifitm1	CD47.vs.Control	1
GO:0007154	cell communication	4166	1	0.58	89	1	0.4927	Ifitm1	CD47.vs.Control	1
GO:0019724	B cell mediated immunity	115	1	0.02	31	1	0.0158	C1qa	CD47.vs.Control	1
GO:1903900	regulation of viral life cycle	120	1	0.02	32	1	0.0165	Ifitm1	CD47.vs.Control	1
GO:0016064	immunoglobulin mediated immune response	113	1	0.02	30	1	0.0156	C1qa	CD47.vs.Control	1
GO:1903901	negative regulation of viral life cycle	66	1	0.01	23	1	0.0091	Ifitm1	CD47.vs.Control	1
GO:0051806	entry into cell of other organism involved in symbiotic interaction	50	1	0.01	17	1	0.0069	Ifitm1	CD47.vs.Control	1
GO:0061053	somite development	71	1	0.01	24	1	0.0098	Ifitm1	CD47.vs.Control	1
GO:0002682	regulation of immune system process	1120	1	0.15	71	1	0.1487	C1qa	CD47.vs.Control	1
GO:0002684	positive regulation of immune system process	794	1	0.11	67	1	0.1067	C1qa	CD47.vs.Control	1
GO:0051828	entry into other organism involved in symbiotic interaction	50	1	0.01	18	1	0.0069	Ifitm1	CD47.vs.Control	1
GO:0002455	humoral immune response mediated by circulating immunoglobulin	48	1	0.01	14	1	0.0066	C1qa	CD47.vs.Control	1
GO:0019058	viral life cycle	170	1	0.02	39	1	0.0233	Ifitm1	CD47.vs.Control	1
GO:0016032	viral process	248	1	0.03	44	1	0.034	Ifitm1	CD47.vs.Control	1
GO:0072376	protein activation cascade	61	1	0.01	22	1	0.0084	C1qa	CD47.vs.Control	1
GO:0034097	response to cytokine	672	1	0.09	63	1	0.0907	Ifitm1	CD47.vs.Control	1
GO:0003002	regionalization	265	1	0.04	46	1	0.0363	Ifitm1	CD47.vs.Control	1
GO:0046596	regulation of viral entry into host cell	27	1	0	5	1	0.0037	Ifitm1	CD47.vs.Control	1
GO:0008150	biological_process	14477	2	2	105	1	1	C1qa / Ifitm1	CD47.vs.Control	1
GO:0035282	segmentation	80	1	0.01	27	1	0.011	Ifitm1	CD47.vs.Control	1
GO:0071310	cellular response to organic substance	1679	1	0.23	76	1	0.2185	Ifitm1	CD47.vs.Control	1
GO:0008152	metabolic process	8224	1	1.14	103	1	0.8135	C1qa	CD47.vs.Control	1
GO:0006807	nitrogen compound metabolic process	7149	1	0.99	99	1	0.7438	C1qa	CD47.vs.Control	1
GO:0009790	embryo development	952	1	0.13	70	1	0.1272	Ifitm1	CD47.vs.Control	1
GO:0046718	viral entry into host cell	47	1	0.01	13	1	0.0065	Ifitm1	CD47.vs.Control	1
GO:0009792	embryo development ending in birth or egg hatching	656	1	0.09	62	1	0.0886	Ifitm1	CD47.vs.Control	1
GO:0042221	response to chemical	2805	1	0.39	84	1	0.35	Ifitm1	CD47.vs.Control	1
GO:0002250	adaptive immune response	360	1	0.05	56	1	0.0491	C1qa	CD47.vs.Control	1
GO:0044238	primary metabolic process	7508	1	1.04	101	1	0.7683	C1qa	CD47.vs.Control	1
GO:0002253	activation of immune response	334	1	0.05	54	1	0.0456	C1qa	CD47.vs.Control	1
GO:0051701	interaction with host	106	1	0.01	29	1	0.0146	Ifitm1	CD47.vs.Control	1
GO:0030260	entry into host cell	50	1	0.01	19	1	0.0069	Ifitm1	CD47.vs.Control	1
GO:0019221	cytokine-mediated signaling pathway	269	1	0.04	47	1	0.0368	Ifitm1	CD47.vs.Control	1
GO:0051704	multi-organism process	1546	1	0.21	74	1	0.2022	Ifitm1	CD47.vs.Control	1
GO:0000002	mitochondrial genome maintenance	32	0	0	106	1	1		CD47.vs.Control	1
GO:0000003	reproduction	1000	0	0.14	107	1	1		CD47.vs.Control	1
GO:0000012	single strand break repair	9	0	0	108	1	1		CD47.vs.Control	1
GO:0000018	regulation of DNA recombination	89	0	0.01	109	1	1		CD47.vs.Control	1
GO:0000019	regulation of mitotic recombination	7	0	0	110	1	1		CD47.vs.Control	1
GO:0000022	mitotic spindle elongation	8	0	0	111	1	1		CD47.vs.Control	1
GO:0000027	ribosomal large subunit assembly	32	0	0	112	1	1		CD47.vs.Control	1
GO:0000028	ribosomal small subunit assembly	17	0	0	113	1	1		CD47.vs.Control	1
GO:0000038	very long-chain fatty acid metabolic process	24	0	0	114	1	1		CD47.vs.Control	1
GO:0000041	transition metal ion transport	72	0	0.01	115	1	1		CD47.vs.Control	1
GO:0000045	autophagosome assembly	88	0	0.01	116	1	1		CD47.vs.Control	1
GO:0000050	urea cycle	8	0	0	117	1	1		CD47.vs.Control	1
GO:0000052	citrulline metabolic process	8	0	0	118	1	1		CD47.vs.Control	1
GO:0000054	ribosomal subunit export from nucleus	15	0	0	119	1	1		CD47.vs.Control	1
GO:0000055	ribosomal large subunit export from nucleus	10	0	0	120	1	1		CD47.vs.Control	1
GO:0000056	ribosomal small subunit export from nucleus	7	0	0	121	1	1		CD47.vs.Control	1
GO:0000060	protein import into nucleus, translocation	44	0	0.01	122	1	1		CD47.vs.Control	1
GO:0000070	mitotic sister chromatid segregation	145	0	0.02	123	1	1		CD47.vs.Control	1
GO:0000075	cell cycle checkpoint	169	0	0.02	124	1	1		CD47.vs.Control	1
GO:0000076	DNA replication checkpoint	14	0	0	125	1	1		CD47.vs.Control	1
GO:0000077	DNA damage checkpoint	97	0	0.01	126	1	1		CD47.vs.Control	1
GO:0000079	regulation of cyclin-dependent protein serine/threonine kinase activity	60	0	0.01	127	1	1		CD47.vs.Control	1
GO:0000082	G1/S transition of mitotic cell cycle	152	0	0.02	128	1	1		CD47.vs.Control	1
GO:0000083	regulation of transcription involved in G1/S transition of mitotic cell cycle	11	0	0	129	1	1		CD47.vs.Control	1
GO:0000086	G2/M transition of mitotic cell cycle	107	0	0.01	130	1	1		CD47.vs.Control	1
GO:0000096	sulfur amino acid metabolic process	27	0	0	131	1	1		CD47.vs.Control	1
GO:0000097	sulfur amino acid biosynthetic process	14	0	0	132	1	1		CD47.vs.Control	1
GO:0000098	sulfur amino acid catabolic process	6	0	0	133	1	1		CD47.vs.Control	1
GO:0000122	negative regulation of transcription by RNA polymerase II	727	0	0.1	134	1	1		CD47.vs.Control	1
GO:0000132	establishment of mitotic spindle orientation	22	0	0	135	1	1		CD47.vs.Control	1
GO:0000147	actin cortical patch assembly	6	0	0	136	1	1		CD47.vs.Control	1
GO:0000154	rRNA modification	23	0	0	137	1	1		CD47.vs.Control	1
GO:0000165	MAPK cascade	643	0	0.09	138	1	1		CD47.vs.Control	1
GO:0000183	chromatin silencing at rDNA	10	0	0	139	1	1		CD47.vs.Control	1
GO:0000184	nuclear-transcribed mRNA catabolic process, nonsense-mediated decay	37	0	0.01	140	1	1		CD47.vs.Control	1
GO:0000185	activation of MAPKKK activity	8	0	0	141	1	1		CD47.vs.Control	1
GO:0000186	activation of MAPKK activity	33	0	0	142	1	1		CD47.vs.Control	1
GO:0000187	activation of MAPK activity	95	0	0.01	143	1	1		CD47.vs.Control	1
GO:0000188	inactivation of MAPK activity	17	0	0	144	1	1		CD47.vs.Control	1
GO:0000209	protein polyubiquitination	170	0	0.02	145	1	1		CD47.vs.Control	1
GO:0000212	meiotic spindle organization	14	0	0	146	1	1		CD47.vs.Control	1
GO:0000226	microtubule cytoskeleton organization	493	0	0.07	147	1	1		CD47.vs.Control	1
GO:0000237	leptotene	5	0	0	148	1	1		CD47.vs.Control	1
GO:0000244	spliceosomal tri-snRNP complex assembly	9	0	0	149	1	1		CD47.vs.Control	1
GO:0000245	spliceosomal complex assembly	42	0	0.01	150	1	1		CD47.vs.Control	1
GO:0000266	mitochondrial fission	35	0	0	151	1	1		CD47.vs.Control	1
GO:0000271	polysaccharide biosynthetic process	57	0	0.01	152	1	1		CD47.vs.Control	1
GO:0000272	polysaccharide catabolic process	20	0	0	153	1	1		CD47.vs.Control	1
GO:0000278	mitotic cell cycle	729	0	0.1	154	1	1		CD47.vs.Control	1
GO:0000279	M phase	8	0	0	155	1	1		CD47.vs.Control	1
GO:0000280	nuclear division	373	0	0.05	156	1	1		CD47.vs.Control	1
GO:0000281	mitotic cytokinesis	77	0	0.01	157	1	1		CD47.vs.Control	1
GO:0000288	nuclear-transcribed mRNA catabolic process, deadenylation-dependent decay	46	0	0.01	158	1	1		CD47.vs.Control	1
GO:0000289	nuclear-transcribed mRNA poly(A) tail shortening	20	0	0	159	1	1		CD47.vs.Control	1
GO:0000290	deadenylation-dependent decapping of nuclear-transcribed mRNA	10	0	0	160	1	1		CD47.vs.Control	1
GO:0000291	nuclear-transcribed mRNA catabolic process, exonucleolytic	14	0	0	161	1	1		CD47.vs.Control	1
GO:0000302	response to reactive oxygen species	179	0	0.02	162	1	1		CD47.vs.Control	1
GO:0000303	response to superoxide	23	0	0	163	1	1		CD47.vs.Control	1
GO:0000305	response to oxygen radical	24	0	0	164	1	1		CD47.vs.Control	1
GO:0000338	protein deneddylation	9	0	0	165	1	1		CD47.vs.Control	1
GO:0000375	RNA splicing, via transesterification reactions	221	0	0.03	166	1	1		CD47.vs.Control	1
GO:0000377	RNA splicing, via transesterification reactions with bulged adenosine as nucleophile	221	0	0.03	167	1	1		CD47.vs.Control	1
GO:0000380	alternative mRNA splicing, via spliceosome	66	0	0.01	168	1	1		CD47.vs.Control	1
GO:0000381	regulation of alternative mRNA splicing, via spliceosome	57	0	0.01	169	1	1		CD47.vs.Control	1
GO:0000387	spliceosomal snRNP assembly	29	0	0	170	1	1		CD47.vs.Control	1
GO:0000393	spliceosomal conformational changes to generate catalytic conformation	5	0	0	171	1	1		CD47.vs.Control	1
GO:0000394	RNA splicing, via endonucleolytic cleavage and ligation	11	0	0	172	1	1		CD47.vs.Control	1
GO:0000395	mRNA 5'-splice site recognition	7	0	0	173	1	1		CD47.vs.Control	1
GO:0000398	mRNA splicing, via spliceosome	221	0	0.03	174	1	1		CD47.vs.Control	1
GO:0000413	protein peptidyl-prolyl isomerization	21	0	0	175	1	1		CD47.vs.Control	1
GO:0000414	regulation of histone H3-K36 methylation	5	0	0	176	1	1		CD47.vs.Control	1
GO:0000422	autophagy of mitochondrion	61	0	0.01	177	1	1		CD47.vs.Control	1
GO:0000423	mitophagy	20	0	0	178	1	1		CD47.vs.Control	1
GO:0000447	endonucleolytic cleavage in ITS1 to separate SSU-rRNA from 5.8S rRNA and LSU-rRNA from tricistronic rRNA transcript (SSU-rRNA, 5.8S rRNA, LSU-rRNA)	7	0	0	179	1	1		CD47.vs.Control	1
GO:0000459	exonucleolytic trimming involved in rRNA processing	7	0	0	180	1	1		CD47.vs.Control	1
GO:0000460	maturation of 5.8S rRNA	26	0	0	181	1	1		CD47.vs.Control	1
GO:0000462	maturation of SSU-rRNA from tricistronic rRNA transcript (SSU-rRNA, 5.8S rRNA, LSU-rRNA)	31	0	0	182	1	1		CD47.vs.Control	1
GO:0000463	maturation of LSU-rRNA from tricistronic rRNA transcript (SSU-rRNA, 5.8S rRNA, LSU-rRNA)	15	0	0	183	1	1		CD47.vs.Control	1
GO:0000466	maturation of 5.8S rRNA from tricistronic rRNA transcript (SSU-rRNA, 5.8S rRNA, LSU-rRNA)	21	0	0	184	1	1		CD47.vs.Control	1
GO:0000467	exonucleolytic trimming to generate mature 3'-end of 5.8S rRNA from tricistronic rRNA transcript (SSU-rRNA, 5.8S rRNA, LSU-rRNA)	7	0	0	185	1	1		CD47.vs.Control	1
GO:0000469	cleavage involved in rRNA processing	21	0	0	186	1	1		CD47.vs.Control	1
GO:0000470	maturation of LSU-rRNA	24	0	0	187	1	1		CD47.vs.Control	1
GO:0000478	endonucleolytic cleavage involved in rRNA processing	11	0	0	188	1	1		CD47.vs.Control	1
GO:0000479	endonucleolytic cleavage of tricistronic rRNA transcript (SSU-rRNA, 5.8S rRNA, LSU-rRNA)	11	0	0	189	1	1		CD47.vs.Control	1
GO:0000491	small nucleolar ribonucleoprotein complex assembly	11	0	0	190	1	1		CD47.vs.Control	1
GO:0000492	box C/D snoRNP assembly	9	0	0	191	1	1		CD47.vs.Control	1
GO:0000578	embryonic axis specification	26	0	0	192	1	1		CD47.vs.Control	1
GO:0000706	meiotic DNA double-strand break processing	6	0	0	193	1	1		CD47.vs.Control	1
GO:0000712	resolution of meiotic recombination intermediates	17	0	0	194	1	1		CD47.vs.Control	1
GO:0000722	telomere maintenance via recombination	16	0	0	195	1	1		CD47.vs.Control	1
GO:0000723	telomere maintenance	118	0	0.02	196	1	1		CD47.vs.Control	1
GO:0000724	double-strand break repair via homologous recombination	111	0	0.02	197	1	1		CD47.vs.Control	1
GO:0000725	recombinational repair	111	0	0.02	198	1	1		CD47.vs.Control	1
GO:0000726	non-recombinational repair	49	0	0.01	199	1	1		CD47.vs.Control	1
GO:0000727	double-strand break repair via break-induced replication	5	0	0	200	1	1		CD47.vs.Control	1
GO:0000729	DNA double-strand break processing	17	0	0	201	1	1		CD47.vs.Control	1
GO:0000730	DNA recombinase assembly	5	0	0	202	1	1		CD47.vs.Control	1
GO:0000731	DNA synthesis involved in DNA repair	25	0	0	203	1	1		CD47.vs.Control	1
GO:0000733	DNA strand renaturation	5	0	0	204	1	1		CD47.vs.Control	1
GO:0000737	DNA catabolic process, endonucleolytic	23	0	0	205	1	1		CD47.vs.Control	1
GO:0000738	DNA catabolic process, exonucleolytic	5	0	0	206	1	1		CD47.vs.Control	1
GO:0000768	syncytium formation by plasma membrane fusion	50	0	0.01	207	1	1		CD47.vs.Control	1
GO:0000819	sister chromatid segregation	175	0	0.02	208	1	1		CD47.vs.Control	1
GO:0000820	regulation of glutamine family amino acid metabolic process	6	0	0	209	1	1		CD47.vs.Control	1
GO:0000902	cell morphogenesis	850	0	0.12	210	1	1		CD47.vs.Control	1
GO:0000904	cell morphogenesis involved in differentiation	610	0	0.08	211	1	1		CD47.vs.Control	1
GO:0000910	cytokinesis	137	0	0.02	212	1	1		CD47.vs.Control	1
GO:0000912	assembly of actomyosin apparatus involved in cytokinesis	6	0	0	213	1	1		CD47.vs.Control	1
GO:0000915	actomyosin contractile ring assembly	6	0	0	214	1	1		CD47.vs.Control	1
GO:0000920	septum digestion after cytokinesis	7	0	0	215	1	1		CD47.vs.Control	1
GO:0000921	septin ring assembly	11	0	0	216	1	1		CD47.vs.Control	1
GO:0000956	nuclear-transcribed mRNA catabolic process	99	0	0.01	217	1	1		CD47.vs.Control	1
GO:0000957	mitochondrial RNA catabolic process	5	0	0	218	1	1		CD47.vs.Control	1
GO:0000959	mitochondrial RNA metabolic process	38	0	0.01	219	1	1		CD47.vs.Control	1
GO:0000963	mitochondrial RNA processing	12	0	0	220	1	1		CD47.vs.Control	1
GO:0000965	mitochondrial RNA 3'-end processing	5	0	0	221	1	1		CD47.vs.Control	1
GO:0000966	RNA 5'-end processing	16	0	0	222	1	1		CD47.vs.Control	1
GO:0000972	transcription-dependent tethering of RNA polymerase II gene DNA at nuclear periphery	6	0	0	223	1	1		CD47.vs.Control	1
GO:0001101	response to acid chemical	208	0	0.03	224	1	1		CD47.vs.Control	1
GO:0001302	replicative cell aging	5	0	0	225	1	1		CD47.vs.Control	1
GO:0001325	formation of extrachromosomal circular DNA	8	0	0	226	1	1		CD47.vs.Control	1
GO:0001501	skeletal system development	393	0	0.05	227	1	1		CD47.vs.Control	1
GO:0001502	cartilage condensation	10	0	0	228	1	1		CD47.vs.Control	1
GO:0001504	neurotransmitter uptake	29	0	0	229	1	1		CD47.vs.Control	1
GO:0001505	regulation of neurotransmitter levels	272	0	0.04	230	1	1		CD47.vs.Control	1
GO:0001508	action potential	81	0	0.01	231	1	1		CD47.vs.Control	1
GO:0001510	RNA methylation	60	0	0.01	232	1	1		CD47.vs.Control	1
GO:0001514	selenocysteine incorporation	7	0	0	233	1	1		CD47.vs.Control	1
GO:0001516	prostaglandin biosynthetic process	21	0	0	234	1	1		CD47.vs.Control	1
GO:0001522	pseudouridine synthesis	17	0	0	235	1	1		CD47.vs.Control	1
GO:0001523	retinoid metabolic process	29	0	0	236	1	1		CD47.vs.Control	1
GO:0001525	angiogenesis	426	0	0.06	237	1	1		CD47.vs.Control	1
GO:0001539	cilium or flagellum-dependent cell motility	20	0	0	238	1	1		CD47.vs.Control	1
GO:0001541	ovarian follicle development	52	0	0.01	239	1	1		CD47.vs.Control	1
GO:0001542	ovulation from ovarian follicle	8	0	0	240	1	1		CD47.vs.Control	1
GO:0001553	luteinization	11	0	0	241	1	1		CD47.vs.Control	1
GO:0001556	oocyte maturation	23	0	0	242	1	1		CD47.vs.Control	1
GO:0001558	regulation of cell growth	356	0	0.05	243	1	1		CD47.vs.Control	1
GO:0001562	response to protozoan	35	0	0	244	1	1		CD47.vs.Control	1
GO:0001568	blood vessel development	595	0	0.08	245	1	1		CD47.vs.Control	1
GO:0001569	branching involved in blood vessel morphogenesis	36	0	0	246	1	1		CD47.vs.Control	1
GO:0001570	vasculogenesis	77	0	0.01	247	1	1		CD47.vs.Control	1
GO:0001573	ganglioside metabolic process	13	0	0	248	1	1		CD47.vs.Control	1
GO:0001574	ganglioside biosynthetic process	6	0	0	249	1	1		CD47.vs.Control	1
GO:0001578	microtubule bundle formation	77	0	0.01	250	1	1		CD47.vs.Control	1
GO:0001580	detection of chemical stimulus involved in sensory perception of bitter taste	8	0	0	251	1	1		CD47.vs.Control	1
GO:0001649	osteoblast differentiation	150	0	0.02	252	1	1		CD47.vs.Control	1
GO:0001654	eye development	282	0	0.04	253	1	1		CD47.vs.Control	1
GO:0001655	urogenital system development	265	0	0.04	254	1	1		CD47.vs.Control	1
GO:0001656	metanephros development	63	0	0.01	255	1	1		CD47.vs.Control	1
GO:0001657	ureteric bud development	73	0	0.01	256	1	1		CD47.vs.Control	1
GO:0001658	branching involved in ureteric bud morphogenesis	39	0	0.01	257	1	1		CD47.vs.Control	1
GO:0001659	temperature homeostasis	145	0	0.02	258	1	1		CD47.vs.Control	1
GO:0001660	fever generation	11	0	0	259	1	1		CD47.vs.Control	1
GO:0001662	behavioral fear response	30	0	0	260	1	1		CD47.vs.Control	1
GO:0001666	response to hypoxia	174	0	0.02	261	1	1		CD47.vs.Control	1
GO:0001667	ameboidal-type cell migration	341	0	0.05	262	1	1		CD47.vs.Control	1
GO:0001672	regulation of chromatin assembly or disassembly	9	0	0	263	1	1		CD47.vs.Control	1
GO:0001675	acrosome assembly	14	0	0	264	1	1		CD47.vs.Control	1
GO:0001676	long-chain fatty acid metabolic process	51	0	0.01	265	1	1		CD47.vs.Control	1
GO:0001678	cellular glucose homeostasis	109	0	0.02	266	1	1		CD47.vs.Control	1
GO:0001682	tRNA 5'-leader removal	11	0	0	267	1	1		CD47.vs.Control	1
GO:0001696	gastric acid secretion	8	0	0	268	1	1		CD47.vs.Control	1
GO:0001701	in utero embryonic development	416	0	0.06	269	1	1		CD47.vs.Control	1
GO:0001702	gastrulation with mouth forming second	26	0	0	270	1	1		CD47.vs.Control	1
GO:0001704	formation of primary germ layer	69	0	0.01	271	1	1		CD47.vs.Control	1
GO:0001706	endoderm formation	24	0	0	272	1	1		CD47.vs.Control	1
GO:0001707	mesoderm formation	46	0	0.01	273	1	1		CD47.vs.Control	1
GO:0001708	cell fate specification	50	0	0.01	274	1	1		CD47.vs.Control	1
GO:0001709	cell fate determination	22	0	0	275	1	1		CD47.vs.Control	1
GO:0001710	mesodermal cell fate commitment	9	0	0	276	1	1		CD47.vs.Control	1
GO:0001711	endodermal cell fate commitment	11	0	0	277	1	1		CD47.vs.Control	1
GO:0001731	formation of translation preinitiation complex	10	0	0	278	1	1		CD47.vs.Control	1
GO:0001736	establishment of planar polarity	49	0	0.01	279	1	1		CD47.vs.Control	1
GO:0001738	morphogenesis of a polarized epithelium	65	0	0.01	280	1	1		CD47.vs.Control	1
GO:0001754	eye photoreceptor cell differentiation	36	0	0	281	1	1		CD47.vs.Control	1
GO:0001755	neural crest cell migration	44	0	0.01	282	1	1		CD47.vs.Control	1
GO:0001759	organ induction	16	0	0	283	1	1		CD47.vs.Control	1
GO:0001763	morphogenesis of a branching structure	184	0	0.03	284	1	1		CD47.vs.Control	1
GO:0001764	neuron migration	126	0	0.02	285	1	1		CD47.vs.Control	1
GO:0001765	membrane raft assembly	10	0	0	286	1	1		CD47.vs.Control	1
GO:0001767	establishment of lymphocyte polarity	8	0	0	287	1	1		CD47.vs.Control	1
GO:0001768	establishment of T cell polarity	8	0	0	288	1	1		CD47.vs.Control	1
GO:0001771	immunological synapse formation	12	0	0	289	1	1		CD47.vs.Control	1
GO:0001773	myeloid dendritic cell activation	32	0	0	290	1	1		CD47.vs.Control	1
GO:0001774	microglial cell activation	29	0	0	291	1	1		CD47.vs.Control	1
GO:0001775	cell activation	817	0	0.11	292	1	1		CD47.vs.Control	1
GO:0001776	leukocyte homeostasis	101	0	0.01	293	1	1		CD47.vs.Control	1
GO:0001777	T cell homeostatic proliferation	5	0	0	294	1	1		CD47.vs.Control	1
GO:0001779	natural killer cell differentiation	30	0	0	295	1	1		CD47.vs.Control	1
GO:0001780	neutrophil homeostasis	20	0	0	296	1	1		CD47.vs.Control	1
GO:0001781	neutrophil apoptotic process	12	0	0	297	1	1		CD47.vs.Control	1
GO:0001782	B cell homeostasis	37	0	0.01	298	1	1		CD47.vs.Control	1
GO:0001783	B cell apoptotic process	25	0	0	299	1	1		CD47.vs.Control	1
GO:0001787	natural killer cell proliferation	9	0	0	300	1	1		CD47.vs.Control	1
GO:0001794	type IIa hypersensitivity	5	0	0	301	1	1		CD47.vs.Control	1
GO:0001796	regulation of type IIa hypersensitivity	5	0	0	302	1	1		CD47.vs.Control	1
GO:0001798	positive regulation of type IIa hypersensitivity	5	0	0	303	1	1		CD47.vs.Control	1
GO:0001810	regulation of type I hypersensitivity	5	0	0	304	1	1		CD47.vs.Control	1
GO:0001816	cytokine production	626	0	0.09	305	1	1		CD47.vs.Control	1
GO:0001817	regulation of cytokine production	560	0	0.08	306	1	1		CD47.vs.Control	1
GO:0001818	negative regulation of cytokine production	224	0	0.03	307	1	1		CD47.vs.Control	1
GO:0001819	positive regulation of cytokine production	366	0	0.05	308	1	1		CD47.vs.Control	1
GO:0001820	serotonin secretion	11	0	0	309	1	1		CD47.vs.Control	1
GO:0001821	histamine secretion	12	0	0	310	1	1		CD47.vs.Control	1
GO:0001822	kidney development	210	0	0.03	311	1	1		CD47.vs.Control	1
GO:0001823	mesonephros development	75	0	0.01	312	1	1		CD47.vs.Control	1
GO:0001824	blastocyst development	123	0	0.02	313	1	1		CD47.vs.Control	1
GO:0001825	blastocyst formation	47	0	0.01	314	1	1		CD47.vs.Control	1
GO:0001826	inner cell mass cell differentiation	6	0	0	315	1	1		CD47.vs.Control	1
GO:0001829	trophectodermal cell differentiation	18	0	0	316	1	1		CD47.vs.Control	1
GO:0001832	blastocyst growth	25	0	0	317	1	1		CD47.vs.Control	1
GO:0001833	inner cell mass cell proliferation	15	0	0	318	1	1		CD47.vs.Control	1
GO:0001835	blastocyst hatching	32	0	0	319	1	1		CD47.vs.Control	1
GO:0001836	release of cytochrome c from mitochondria	55	0	0.01	320	1	1		CD47.vs.Control	1
GO:0001837	epithelial to mesenchymal transition	117	0	0.02	321	1	1		CD47.vs.Control	1
GO:0001838	embryonic epithelial tube formation	133	0	0.02	322	1	1		CD47.vs.Control	1
GO:0001839	neural plate morphogenesis	6	0	0	323	1	1		CD47.vs.Control	1
GO:0001840	neural plate development	9	0	0	324	1	1		CD47.vs.Control	1
GO:0001841	neural tube formation	116	0	0.02	325	1	1		CD47.vs.Control	1
GO:0001842	neural fold formation	8	0	0	326	1	1		CD47.vs.Control	1
GO:0001843	neural tube closure	98	0	0.01	327	1	1		CD47.vs.Control	1
GO:0001844	protein insertion into mitochondrial membrane involved in apoptotic signaling pathway	5	0	0	328	1	1		CD47.vs.Control	1
GO:0001845	phagolysosome assembly	12	0	0	329	1	1		CD47.vs.Control	1
GO:0001865	NK T cell differentiation	11	0	0	330	1	1		CD47.vs.Control	1
GO:0001866	NK T cell proliferation	7	0	0	331	1	1		CD47.vs.Control	1
GO:0001867	complement activation, lectin pathway	7	0	0	332	1	1		CD47.vs.Control	1
GO:0001881	receptor recycling	34	0	0	333	1	1		CD47.vs.Control	1
GO:0001885	endothelial cell development	54	0	0.01	334	1	1		CD47.vs.Control	1
GO:0001886	endothelial cell morphogenesis	12	0	0	335	1	1		CD47.vs.Control	1
GO:0001889	liver development	100	0	0.01	336	1	1		CD47.vs.Control	1
GO:0001890	placenta development	138	0	0.02	337	1	1		CD47.vs.Control	1
GO:0001892	embryonic placenta development	94	0	0.01	338	1	1		CD47.vs.Control	1
GO:0001893	maternal placenta development	24	0	0	339	1	1		CD47.vs.Control	1
GO:0001894	tissue homeostasis	176	0	0.02	340	1	1		CD47.vs.Control	1
GO:0001895	retina homeostasis	38	0	0.01	341	1	1		CD47.vs.Control	1
GO:0001906	cell killing	132	0	0.02	342	1	1		CD47.vs.Control	1
GO:0001909	leukocyte mediated cytotoxicity	109	0	0.02	343	1	1		CD47.vs.Control	1
GO:0001910	regulation of leukocyte mediated cytotoxicity	79	0	0.01	344	1	1		CD47.vs.Control	1
GO:0001911	negative regulation of leukocyte mediated cytotoxicity	20	0	0	345	1	1		CD47.vs.Control	1
GO:0001912	positive regulation of leukocyte mediated cytotoxicity	61	0	0.01	346	1	1		CD47.vs.Control	1
GO:0001913	T cell mediated cytotoxicity	54	0	0.01	347	1	1		CD47.vs.Control	1
GO:0001914	regulation of T cell mediated cytotoxicity	36	0	0	348	1	1		CD47.vs.Control	1
GO:0001916	positive regulation of T cell mediated cytotoxicity	31	0	0	349	1	1		CD47.vs.Control	1
GO:0001919	regulation of receptor recycling	26	0	0	350	1	1		CD47.vs.Control	1
GO:0001921	positive regulation of receptor recycling	16	0	0	351	1	1		CD47.vs.Control	1
GO:0001922	B-1 B cell homeostasis	5	0	0	352	1	1		CD47.vs.Control	1
GO:0001932	regulation of protein phosphorylation	1163	0	0.16	353	1	1		CD47.vs.Control	1
GO:0001933	negative regulation of protein phosphorylation	360	0	0.05	354	1	1		CD47.vs.Control	1
GO:0001934	positive regulation of protein phosphorylation	808	0	0.11	355	1	1		CD47.vs.Control	1
GO:0001935	endothelial cell proliferation	122	0	0.02	356	1	1		CD47.vs.Control	1
GO:0001936	regulation of endothelial cell proliferation	110	0	0.02	357	1	1		CD47.vs.Control	1
GO:0001937	negative regulation of endothelial cell proliferation	34	0	0	358	1	1		CD47.vs.Control	1
GO:0001938	positive regulation of endothelial cell proliferation	80	0	0.01	359	1	1		CD47.vs.Control	1
GO:0001941	postsynaptic membrane organization	34	0	0	360	1	1		CD47.vs.Control	1
GO:0001942	hair follicle development	82	0	0.01	361	1	1		CD47.vs.Control	1
GO:0001944	vasculature development	623	0	0.09	362	1	1		CD47.vs.Control	1
GO:0001945	lymph vessel development	25	0	0	363	1	1		CD47.vs.Control	1
GO:0001946	lymphangiogenesis	19	0	0	364	1	1		CD47.vs.Control	1
GO:0001947	heart looping	45	0	0.01	365	1	1		CD47.vs.Control	1
GO:0001952	regulation of cell-matrix adhesion	98	0	0.01	366	1	1		CD47.vs.Control	1
GO:0001953	negative regulation of cell-matrix adhesion	32	0	0	367	1	1		CD47.vs.Control	1
GO:0001954	positive regulation of cell-matrix adhesion	47	0	0.01	368	1	1		CD47.vs.Control	1
GO:0001955	blood vessel maturation	7	0	0	369	1	1		CD47.vs.Control	1
GO:0001956	positive regulation of neurotransmitter secretion	17	0	0	370	1	1		CD47.vs.Control	1
GO:0001958	endochondral ossification	20	0	0	371	1	1		CD47.vs.Control	1
GO:0001959	regulation of cytokine-mediated signaling pathway	93	0	0.01	372	1	1		CD47.vs.Control	1
GO:0001960	negative regulation of cytokine-mediated signaling pathway	42	0	0.01	373	1	1		CD47.vs.Control	1
GO:0001961	positive regulation of cytokine-mediated signaling pathway	40	0	0.01	374	1	1		CD47.vs.Control	1
GO:0001963	synaptic transmission, dopaminergic	18	0	0	375	1	1		CD47.vs.Control	1
GO:0001964	startle response	15	0	0	376	1	1		CD47.vs.Control	1
GO:0001967	suckling behavior	13	0	0	377	1	1		CD47.vs.Control	1
GO:0001973	adenosine receptor signaling pathway	10	0	0	378	1	1		CD47.vs.Control	1
GO:0001974	blood vessel remodeling	42	0	0.01	379	1	1		CD47.vs.Control	1
GO:0001975	response to amphetamine	11	0	0	380	1	1		CD47.vs.Control	1
GO:0001976	neurological system process involved in regulation of systemic arterial blood pressure	11	0	0	381	1	1		CD47.vs.Control	1
GO:0001977	renal system process involved in regulation of blood volume	11	0	0	382	1	1		CD47.vs.Control	1
GO:0001990	regulation of systemic arterial blood pressure by hormone	24	0	0	383	1	1		CD47.vs.Control	1
GO:0001991	regulation of systemic arterial blood pressure by circulatory renin-angiotensin	9	0	0	384	1	1		CD47.vs.Control	1
GO:0001999	renal response to blood flow involved in circulatory renin-angiotensin regulation of systemic arterial blood pressure	6	0	0	385	1	1		CD47.vs.Control	1
GO:0002001	renin secretion into blood stream	6	0	0	386	1	1		CD47.vs.Control	1
GO:0002009	morphogenesis of an epithelium	439	0	0.06	387	1	1		CD47.vs.Control	1
GO:0002011	morphogenesis of an epithelial sheet	49	0	0.01	388	1	1		CD47.vs.Control	1
GO:0002016	regulation of blood volume by renin-angiotensin	5	0	0	389	1	1		CD47.vs.Control	1
GO:0002021	response to dietary excess	18	0	0	390	1	1		CD47.vs.Control	1
GO:0002024	diet induced thermogenesis	8	0	0	391	1	1		CD47.vs.Control	1
GO:0002026	regulation of the force of heart contraction	26	0	0	392	1	1		CD47.vs.Control	1
GO:0002027	regulation of heart rate	55	0	0.01	393	1	1		CD47.vs.Control	1
GO:0002028	regulation of sodium ion transport	78	0	0.01	394	1	1		CD47.vs.Control	1
GO:0002029	desensitization of G protein-coupled receptor signaling pathway	23	0	0	395	1	1		CD47.vs.Control	1
GO:0002031	G protein-coupled receptor internalization	13	0	0	396	1	1		CD47.vs.Control	1
GO:0002036	regulation of L-glutamate import across plasma membrane	6	0	0	397	1	1		CD47.vs.Control	1
GO:0002040	sprouting angiogenesis	99	0	0.01	398	1	1		CD47.vs.Control	1
GO:0002042	cell migration involved in sprouting angiogenesis	48	0	0.01	399	1	1		CD47.vs.Control	1
GO:0002043	blood vessel endothelial cell proliferation involved in sprouting angiogenesis	14	0	0	400	1	1		CD47.vs.Control	1
GO:0002051	osteoblast fate commitment	6	0	0	401	1	1		CD47.vs.Control	1
GO:0002052	positive regulation of neuroblast proliferation	22	0	0	402	1	1		CD47.vs.Control	1
GO:0002053	positive regulation of mesenchymal cell proliferation	33	0	0	403	1	1		CD47.vs.Control	1
GO:0002062	chondrocyte differentiation	89	0	0.01	404	1	1		CD47.vs.Control	1
GO:0002063	chondrocyte development	35	0	0	405	1	1		CD47.vs.Control	1
GO:0002064	epithelial cell development	190	0	0.03	406	1	1		CD47.vs.Control	1
GO:0002065	columnar/cuboidal epithelial cell differentiation	97	0	0.01	407	1	1		CD47.vs.Control	1
GO:0002066	columnar/cuboidal epithelial cell development	48	0	0.01	408	1	1		CD47.vs.Control	1
GO:0002067	glandular epithelial cell differentiation	37	0	0.01	409	1	1		CD47.vs.Control	1
GO:0002068	glandular epithelial cell development	18	0	0	410	1	1		CD47.vs.Control	1
GO:0002070	epithelial cell maturation	14	0	0	411	1	1		CD47.vs.Control	1
GO:0002072	optic cup morphogenesis involved in camera-type eye development	5	0	0	412	1	1		CD47.vs.Control	1
GO:0002076	osteoblast development	13	0	0	413	1	1		CD47.vs.Control	1
GO:0002082	regulation of oxidative phosphorylation	24	0	0	414	1	1		CD47.vs.Control	1
GO:0002084	protein depalmitoylation	9	0	0	415	1	1		CD47.vs.Control	1
GO:0002087	regulation of respiratory gaseous exchange by neurological system process	9	0	0	416	1	1		CD47.vs.Control	1
GO:0002088	lens development in camera-type eye	54	0	0.01	417	1	1		CD47.vs.Control	1
GO:0002089	lens morphogenesis in camera-type eye	20	0	0	418	1	1		CD47.vs.Control	1
GO:0002090	regulation of receptor internalization	55	0	0.01	419	1	1		CD47.vs.Control	1
GO:0002091	negative regulation of receptor internalization	8	0	0	420	1	1		CD47.vs.Control	1
GO:0002092	positive regulation of receptor internalization	24	0	0	421	1	1		CD47.vs.Control	1
GO:0002093	auditory receptor cell morphogenesis	15	0	0	422	1	1		CD47.vs.Control	1
GO:0002097	tRNA wobble base modification	17	0	0	423	1	1		CD47.vs.Control	1
GO:0002098	tRNA wobble uridine modification	14	0	0	424	1	1		CD47.vs.Control	1
GO:0002115	store-operated calcium entry	19	0	0	425	1	1		CD47.vs.Control	1
GO:0002138	retinoic acid biosynthetic process	8	0	0	426	1	1		CD47.vs.Control	1
GO:0002154	thyroid hormone mediated signaling pathway	5	0	0	427	1	1		CD47.vs.Control	1
GO:0002158	osteoclast proliferation	5	0	0	428	1	1		CD47.vs.Control	1
GO:0002176	male germ cell proliferation	9	0	0	429	1	1		CD47.vs.Control	1
GO:0002181	cytoplasmic translation	77	0	0.01	430	1	1		CD47.vs.Control	1
GO:0002182	cytoplasmic translational elongation	8	0	0	431	1	1		CD47.vs.Control	1
GO:0002183	cytoplasmic translational initiation	18	0	0	432	1	1		CD47.vs.Control	1
GO:0002190	cap-independent translational initiation	5	0	0	433	1	1		CD47.vs.Control	1
GO:0002200	somatic diversification of immune receptors	65	0	0.01	434	1	1		CD47.vs.Control	1
GO:0002204	somatic recombination of immunoglobulin genes involved in immune response	47	0	0.01	435	1	1		CD47.vs.Control	1
GO:0002208	somatic diversification of immunoglobulins involved in immune response	47	0	0.01	436	1	1		CD47.vs.Control	1
GO:0002209	behavioral defense response	30	0	0	437	1	1		CD47.vs.Control	1
GO:0002218	activation of innate immune response	136	0	0.02	438	1	1		CD47.vs.Control	1
GO:0002220	innate immune response activating cell surface receptor signaling pathway	5	0	0	439	1	1		CD47.vs.Control	1
GO:0002221	pattern recognition receptor signaling pathway	118	0	0.02	440	1	1		CD47.vs.Control	1
GO:0002224	toll-like receptor signaling pathway	89	0	0.01	441	1	1		CD47.vs.Control	1
GO:0002227	innate immune response in mucosa	13	0	0	442	1	1		CD47.vs.Control	1
GO:0002228	natural killer cell mediated immunity	58	0	0.01	443	1	1		CD47.vs.Control	1
GO:0002230	positive regulation of defense response to virus by host	26	0	0	444	1	1		CD47.vs.Control	1
GO:0002237	response to molecule of bacterial origin	240	0	0.03	445	1	1		CD47.vs.Control	1
GO:0002244	hematopoietic progenitor cell differentiation	113	0	0.02	446	1	1		CD47.vs.Control	1
GO:0002246	wound healing involved in inflammatory response	9	0	0	447	1	1		CD47.vs.Control	1
GO:0002248	connective tissue replacement involved in inflammatory response wound healing	6	0	0	448	1	1		CD47.vs.Control	1
GO:0002249	lymphocyte anergy	7	0	0	449	1	1		CD47.vs.Control	1
GO:0002251	organ or tissue specific immune response	22	0	0	450	1	1		CD47.vs.Control	1
GO:0002260	lymphocyte homeostasis	74	0	0.01	451	1	1		CD47.vs.Control	1
GO:0002262	myeloid cell homeostasis	154	0	0.02	452	1	1		CD47.vs.Control	1
GO:0002263	cell activation involved in immune response	220	0	0.03	453	1	1		CD47.vs.Control	1
GO:0002269	leukocyte activation involved in inflammatory response	29	0	0	454	1	1		CD47.vs.Control	1
GO:0002274	myeloid leukocyte activation	168	0	0.02	455	1	1		CD47.vs.Control	1
GO:0002275	myeloid cell activation involved in immune response	70	0	0.01	456	1	1		CD47.vs.Control	1
GO:0002278	eosinophil activation involved in immune response	5	0	0	457	1	1		CD47.vs.Control	1
GO:0002279	mast cell activation involved in immune response	39	0	0.01	458	1	1		CD47.vs.Control	1
GO:0002281	macrophage activation involved in immune response	12	0	0	459	1	1		CD47.vs.Control	1
GO:0002283	neutrophil activation involved in immune response	15	0	0	460	1	1		CD47.vs.Control	1
GO:0002285	lymphocyte activation involved in immune response	155	0	0.02	461	1	1		CD47.vs.Control	1
GO:0002286	T cell activation involved in immune response	86	0	0.01	462	1	1		CD47.vs.Control	1
GO:0002287	alpha-beta T cell activation involved in immune response	62	0	0.01	463	1	1		CD47.vs.Control	1
GO:0002291	T cell activation via T cell receptor contact with antigen bound to MHC molecule on antigen presenting cell	5	0	0	464	1	1		CD47.vs.Control	1
GO:0002292	T cell differentiation involved in immune response	66	0	0.01	465	1	1		CD47.vs.Control	1
GO:0002293	alpha-beta T cell differentiation involved in immune response	61	0	0.01	466	1	1		CD47.vs.Control	1
GO:0002294	CD4-positive, alpha-beta T cell differentiation involved in immune response	60	0	0.01	467	1	1		CD47.vs.Control	1
GO:0002295	T-helper cell lineage commitment	16	0	0	468	1	1		CD47.vs.Control	1
GO:0002312	B cell activation involved in immune response	72	0	0.01	469	1	1		CD47.vs.Control	1
GO:0002313	mature B cell differentiation involved in immune response	19	0	0	470	1	1		CD47.vs.Control	1
GO:0002315	marginal zone B cell differentiation	10	0	0	471	1	1		CD47.vs.Control	1
GO:0002318	myeloid progenitor cell differentiation	9	0	0	472	1	1		CD47.vs.Control	1
GO:0002320	lymphoid progenitor cell differentiation	20	0	0	473	1	1		CD47.vs.Control	1
GO:0002322	B cell proliferation involved in immune response	5	0	0	474	1	1		CD47.vs.Control	1
GO:0002323	natural killer cell activation involved in immune response	17	0	0	475	1	1		CD47.vs.Control	1
GO:0002327	immature B cell differentiation	8	0	0	476	1	1		CD47.vs.Control	1
GO:0002328	pro-B cell differentiation	13	0	0	477	1	1		CD47.vs.Control	1
GO:0002335	mature B cell differentiation	24	0	0	478	1	1		CD47.vs.Control	1
GO:0002339	B cell selection	5	0	0	479	1	1		CD47.vs.Control	1
GO:0002347	response to tumor cell	22	0	0	480	1	1		CD47.vs.Control	1
GO:0002349	histamine production involved in inflammatory response	8	0	0	481	1	1		CD47.vs.Control	1
GO:0002360	T cell lineage commitment	25	0	0	482	1	1		CD47.vs.Control	1
GO:0002361	CD4-positive, CD25-positive, alpha-beta regulatory T cell differentiation	7	0	0	483	1	1		CD47.vs.Control	1
GO:0002363	alpha-beta T cell lineage commitment	19	0	0	484	1	1		CD47.vs.Control	1
GO:0002366	leukocyte activation involved in immune response	216	0	0.03	485	1	1		CD47.vs.Control	1
GO:0002367	cytokine production involved in immune response	89	0	0.01	486	1	1		CD47.vs.Control	1
GO:0002369	T cell cytokine production	37	0	0.01	487	1	1		CD47.vs.Control	1
GO:0002371	dendritic cell cytokine production	13	0	0	488	1	1		CD47.vs.Control	1
GO:0002372	myeloid dendritic cell cytokine production	6	0	0	489	1	1		CD47.vs.Control	1
GO:0002374	cytokine secretion involved in immune response	18	0	0	490	1	1		CD47.vs.Control	1
GO:0002377	immunoglobulin production	129	0	0.02	491	1	1		CD47.vs.Control	1
GO:0002381	immunoglobulin production involved in immunoglobulin mediated immune response	56	0	0.01	492	1	1		CD47.vs.Control	1
GO:0002385	mucosal immune response	21	0	0	493	1	1		CD47.vs.Control	1
GO:0002407	dendritic cell chemotaxis	15	0	0	494	1	1		CD47.vs.Control	1
GO:0002418	immune response to tumor cell	20	0	0	495	1	1		CD47.vs.Control	1
GO:0002420	natural killer cell mediated cytotoxicity directed against tumor cell target	10	0	0	496	1	1		CD47.vs.Control	1
GO:0002423	natural killer cell mediated immune response to tumor cell	10	0	0	497	1	1		CD47.vs.Control	1
GO:0002428	antigen processing and presentation of peptide antigen via MHC class Ib	17	0	0	498	1	1		CD47.vs.Control	1
GO:0002429	immune response-activating cell surface receptor signaling pathway	179	0	0.02	499	1	1		CD47.vs.Control	1
GO:0002430	complement receptor mediated signaling pathway	8	0	0	500	1	1		CD47.vs.Control	1
GO:0002431	Fc receptor mediated stimulatory signaling pathway	13	0	0	501	1	1		CD47.vs.Control	1
GO:0002433	immune response-regulating cell surface receptor signaling pathway involved in phagocytosis	6	0	0	502	1	1		CD47.vs.Control	1
GO:0002437	inflammatory response to antigenic stimulus	43	0	0.01	503	1	1		CD47.vs.Control	1
GO:0002438	acute inflammatory response to antigenic stimulus	20	0	0	504	1	1		CD47.vs.Control	1
GO:0002440	production of molecular mediator of immune response	206	0	0.03	505	1	1		CD47.vs.Control	1
GO:0002441	histamine secretion involved in inflammatory response	8	0	0	506	1	1		CD47.vs.Control	1
GO:0002444	myeloid leukocyte mediated immunity	82	0	0.01	507	1	1		CD47.vs.Control	1
GO:0002445	type II hypersensitivity	5	0	0	508	1	1		CD47.vs.Control	1
GO:0002446	neutrophil mediated immunity	30	0	0	509	1	1		CD47.vs.Control	1
GO:0002447	eosinophil mediated immunity	5	0	0	510	1	1		CD47.vs.Control	1
GO:0002448	mast cell mediated immunity	40	0	0.01	511	1	1		CD47.vs.Control	1
GO:0002456	T cell mediated immunity	106	0	0.01	512	1	1		CD47.vs.Control	1
GO:0002457	T cell antigen processing and presentation	5	0	0	513	1	1		CD47.vs.Control	1
GO:0002467	germinal center formation	16	0	0	514	1	1		CD47.vs.Control	1
GO:0002468	dendritic cell antigen processing and presentation	8	0	0	515	1	1		CD47.vs.Control	1
GO:0002474	antigen processing and presentation of peptide antigen via MHC class I	20	0	0	516	1	1		CD47.vs.Control	1
GO:0002475	antigen processing and presentation via MHC class Ib	20	0	0	517	1	1		CD47.vs.Control	1
GO:0002476	antigen processing and presentation of endogenous peptide antigen via MHC class Ib	16	0	0	518	1	1		CD47.vs.Control	1
GO:0002478	antigen processing and presentation of exogenous peptide antigen	23	0	0	519	1	1		CD47.vs.Control	1
GO:0002483	antigen processing and presentation of endogenous peptide antigen	21	0	0	520	1	1		CD47.vs.Control	1
GO:0002495	antigen processing and presentation of peptide antigen via MHC class II	18	0	0	521	1	1		CD47.vs.Control	1
GO:0002504	antigen processing and presentation of peptide or polysaccharide antigen via MHC class II	19	0	0	522	1	1		CD47.vs.Control	1
GO:0002507	tolerance induction	26	0	0	523	1	1		CD47.vs.Control	1
GO:0002513	tolerance induction to self antigen	5	0	0	524	1	1		CD47.vs.Control	1
GO:0002517	T cell tolerance induction	12	0	0	525	1	1		CD47.vs.Control	1
GO:0002520	immune system development	853	0	0.12	526	1	1		CD47.vs.Control	1
GO:0002521	leukocyte differentiation	486	0	0.07	527	1	1		CD47.vs.Control	1
GO:0002523	leukocyte migration involved in inflammatory response	16	0	0	528	1	1		CD47.vs.Control	1
GO:0002524	hypersensitivity	11	0	0	529	1	1		CD47.vs.Control	1
GO:0002526	acute inflammatory response	88	0	0.01	530	1	1		CD47.vs.Control	1
GO:0002532	production of molecular mediator involved in inflammatory response	60	0	0.01	531	1	1		CD47.vs.Control	1
GO:0002534	cytokine production involved in inflammatory response	36	0	0	532	1	1		CD47.vs.Control	1
GO:0002536	respiratory burst involved in inflammatory response	5	0	0	533	1	1		CD47.vs.Control	1
GO:0002544	chronic inflammatory response	14	0	0	534	1	1		CD47.vs.Control	1
GO:0002548	monocyte chemotaxis	45	0	0.01	535	1	1		CD47.vs.Control	1
GO:0002551	mast cell chemotaxis	13	0	0	536	1	1		CD47.vs.Control	1
GO:0002553	histamine secretion by mast cell	8	0	0	537	1	1		CD47.vs.Control	1
GO:0002562	somatic diversification of immune receptors via germline recombination within a single locus	59	0	0.01	538	1	1		CD47.vs.Control	1
GO:0002566	somatic diversification of immune receptors via somatic mutation	13	0	0	539	1	1		CD47.vs.Control	1
GO:0002568	somatic diversification of T cell receptor genes	5	0	0	540	1	1		CD47.vs.Control	1
GO:0002573	myeloid leukocyte differentiation	191	0	0.03	541	1	1		CD47.vs.Control	1
GO:0002576	platelet degranulation	7	0	0	542	1	1		CD47.vs.Control	1
GO:0002577	regulation of antigen processing and presentation	16	0	0	543	1	1		CD47.vs.Control	1
GO:0002578	negative regulation of antigen processing and presentation	5	0	0	544	1	1		CD47.vs.Control	1
GO:0002579	positive regulation of antigen processing and presentation	10	0	0	545	1	1		CD47.vs.Control	1
GO:0002580	regulation of antigen processing and presentation of peptide or polysaccharide antigen via MHC class II	5	0	0	546	1	1		CD47.vs.Control	1
GO:0002583	regulation of antigen processing and presentation of peptide antigen	7	0	0	547	1	1		CD47.vs.Control	1
GO:0002604	regulation of dendritic cell antigen processing and presentation	6	0	0	548	1	1		CD47.vs.Control	1
GO:0002606	positive regulation of dendritic cell antigen processing and presentation	5	0	0	549	1	1		CD47.vs.Control	1
GO:0002634	regulation of germinal center formation	10	0	0	550	1	1		CD47.vs.Control	1
GO:0002636	positive regulation of germinal center formation	5	0	0	551	1	1		CD47.vs.Control	1
GO:0002637	regulation of immunoglobulin production	66	0	0.01	552	1	1		CD47.vs.Control	1
GO:0002638	negative regulation of immunoglobulin production	11	0	0	553	1	1		CD47.vs.Control	1
GO:0002639	positive regulation of immunoglobulin production	46	0	0.01	554	1	1		CD47.vs.Control	1
GO:0002643	regulation of tolerance induction	19	0	0	555	1	1		CD47.vs.Control	1
GO:0002645	positive regulation of tolerance induction	10	0	0	556	1	1		CD47.vs.Control	1
GO:0002664	regulation of T cell tolerance induction	11	0	0	557	1	1		CD47.vs.Control	1
GO:0002666	positive regulation of T cell tolerance induction	7	0	0	558	1	1		CD47.vs.Control	1
GO:0002667	regulation of T cell anergy	7	0	0	559	1	1		CD47.vs.Control	1
GO:0002673	regulation of acute inflammatory response	47	0	0.01	560	1	1		CD47.vs.Control	1
GO:0002674	negative regulation of acute inflammatory response	10	0	0	561	1	1		CD47.vs.Control	1
GO:0002675	positive regulation of acute inflammatory response	23	0	0	562	1	1		CD47.vs.Control	1
GO:0002676	regulation of chronic inflammatory response	10	0	0	563	1	1		CD47.vs.Control	1
GO:0002677	negative regulation of chronic inflammatory response	5	0	0	564	1	1		CD47.vs.Control	1
GO:0002678	positive regulation of chronic inflammatory response	5	0	0	565	1	1		CD47.vs.Control	1
GO:0002679	respiratory burst involved in defense response	8	0	0	566	1	1		CD47.vs.Control	1
GO:0002681	somatic recombination of T cell receptor gene segments	5	0	0	567	1	1		CD47.vs.Control	1
GO:0002683	negative regulation of immune system process	412	0	0.06	568	1	1		CD47.vs.Control	1
GO:0002685	regulation of leukocyte migration	168	0	0.02	569	1	1		CD47.vs.Control	1
GO:0002686	negative regulation of leukocyte migration	35	0	0	570	1	1		CD47.vs.Control	1
GO:0002687	positive regulation of leukocyte migration	122	0	0.02	571	1	1		CD47.vs.Control	1
GO:0002688	regulation of leukocyte chemotaxis	100	0	0.01	572	1	1		CD47.vs.Control	1
GO:0002689	negative regulation of leukocyte chemotaxis	15	0	0	573	1	1		CD47.vs.Control	1
GO:0002690	positive regulation of leukocyte chemotaxis	77	0	0.01	574	1	1		CD47.vs.Control	1
GO:0002691	regulation of cellular extravasation	26	0	0	575	1	1		CD47.vs.Control	1
GO:0002692	negative regulation of cellular extravasation	6	0	0	576	1	1		CD47.vs.Control	1
GO:0002693	positive regulation of cellular extravasation	19	0	0	577	1	1		CD47.vs.Control	1
GO:0002694	regulation of leukocyte activation	463	0	0.06	578	1	1		CD47.vs.Control	1
GO:0002695	negative regulation of leukocyte activation	156	0	0.02	579	1	1		CD47.vs.Control	1
GO:0002696	positive regulation of leukocyte activation	292	0	0.04	580	1	1		CD47.vs.Control	1
GO:0002697	regulation of immune effector process	340	0	0.05	581	1	1		CD47.vs.Control	1
GO:0002698	negative regulation of immune effector process	116	0	0.02	582	1	1		CD47.vs.Control	1
GO:0002699	positive regulation of immune effector process	209	0	0.03	583	1	1		CD47.vs.Control	1
GO:0002700	regulation of production of molecular mediator of immune response	127	0	0.02	584	1	1		CD47.vs.Control	1
GO:0002701	negative regulation of production of molecular mediator of immune response	31	0	0	585	1	1		CD47.vs.Control	1
GO:0002702	positive regulation of production of molecular mediator of immune response	90	0	0.01	586	1	1		CD47.vs.Control	1
GO:0002703	regulation of leukocyte mediated immunity	202	0	0.03	587	1	1		CD47.vs.Control	1
GO:0002704	negative regulation of leukocyte mediated immunity	51	0	0.01	588	1	1		CD47.vs.Control	1
GO:0002705	positive regulation of leukocyte mediated immunity	139	0	0.02	589	1	1		CD47.vs.Control	1
GO:0002706	regulation of lymphocyte mediated immunity	154	0	0.02	590	1	1		CD47.vs.Control	1
GO:0002707	negative regulation of lymphocyte mediated immunity	42	0	0.01	591	1	1		CD47.vs.Control	1
GO:0002708	positive regulation of lymphocyte mediated immunity	112	0	0.02	592	1	1		CD47.vs.Control	1
GO:0002709	regulation of T cell mediated immunity	72	0	0.01	593	1	1		CD47.vs.Control	1
GO:0002710	negative regulation of T cell mediated immunity	18	0	0	594	1	1		CD47.vs.Control	1
GO:0002711	positive regulation of T cell mediated immunity	51	0	0.01	595	1	1		CD47.vs.Control	1
GO:0002712	regulation of B cell mediated immunity	53	0	0.01	596	1	1		CD47.vs.Control	1
GO:0002713	negative regulation of B cell mediated immunity	8	0	0	597	1	1		CD47.vs.Control	1
GO:0002714	positive regulation of B cell mediated immunity	41	0	0.01	598	1	1		CD47.vs.Control	1
GO:0002715	regulation of natural killer cell mediated immunity	45	0	0.01	599	1	1		CD47.vs.Control	1
GO:0002716	negative regulation of natural killer cell mediated immunity	17	0	0	600	1	1		CD47.vs.Control	1
GO:0002717	positive regulation of natural killer cell mediated immunity	31	0	0	601	1	1		CD47.vs.Control	1
GO:0002718	regulation of cytokine production involved in immune response	71	0	0.01	602	1	1		CD47.vs.Control	1
GO:0002719	negative regulation of cytokine production involved in immune response	22	0	0	603	1	1		CD47.vs.Control	1
GO:0002720	positive regulation of cytokine production involved in immune response	46	0	0.01	604	1	1		CD47.vs.Control	1
GO:0002724	regulation of T cell cytokine production	27	0	0	605	1	1		CD47.vs.Control	1
GO:0002725	negative regulation of T cell cytokine production	9	0	0	606	1	1		CD47.vs.Control	1
GO:0002726	positive regulation of T cell cytokine production	18	0	0	607	1	1		CD47.vs.Control	1
GO:0002730	regulation of dendritic cell cytokine production	12	0	0	608	1	1		CD47.vs.Control	1
GO:0002732	positive regulation of dendritic cell cytokine production	7	0	0	609	1	1		CD47.vs.Control	1
GO:0002733	regulation of myeloid dendritic cell cytokine production	6	0	0	610	1	1		CD47.vs.Control	1
GO:0002735	positive regulation of myeloid dendritic cell cytokine production	6	0	0	611	1	1		CD47.vs.Control	1
GO:0002739	regulation of cytokine secretion involved in immune response	13	0	0	612	1	1		CD47.vs.Control	1
GO:0002741	positive regulation of cytokine secretion involved in immune response	8	0	0	613	1	1		CD47.vs.Control	1
GO:0002753	cytoplasmic pattern recognition receptor signaling pathway	33	0	0	614	1	1		CD47.vs.Control	1
GO:0002755	MyD88-dependent toll-like receptor signaling pathway	19	0	0	615	1	1		CD47.vs.Control	1
GO:0002756	MyD88-independent toll-like receptor signaling pathway	11	0	0	616	1	1		CD47.vs.Control	1
GO:0002757	immune response-activating signal transduction	286	0	0.04	617	1	1		CD47.vs.Control	1
GO:0002758	innate immune response-activating signal transduction	120	0	0.02	618	1	1		CD47.vs.Control	1
GO:0002761	regulation of myeloid leukocyte differentiation	111	0	0.02	619	1	1		CD47.vs.Control	1
GO:0002762	negative regulation of myeloid leukocyte differentiation	44	0	0.01	620	1	1		CD47.vs.Control	1
GO:0002763	positive regulation of myeloid leukocyte differentiation	56	0	0.01	621	1	1		CD47.vs.Control	1
GO:0002764	immune response-regulating signaling pathway	298	0	0.04	622	1	1		CD47.vs.Control	1
GO:0002765	immune response-inhibiting signal transduction	5	0	0	623	1	1		CD47.vs.Control	1
GO:0002768	immune response-regulating cell surface receptor signaling pathway	189	0	0.03	624	1	1		CD47.vs.Control	1
GO:0002790	peptide secretion	499	0	0.07	625	1	1		CD47.vs.Control	1
GO:0002791	regulation of peptide secretion	404	0	0.06	626	1	1		CD47.vs.Control	1
GO:0002792	negative regulation of peptide secretion	122	0	0.02	627	1	1		CD47.vs.Control	1
GO:0002793	positive regulation of peptide secretion	256	0	0.04	628	1	1		CD47.vs.Control	1
GO:0002819	regulation of adaptive immune response	169	0	0.02	629	1	1		CD47.vs.Control	1
GO:0002820	negative regulation of adaptive immune response	42	0	0.01	630	1	1		CD47.vs.Control	1
GO:0002821	positive regulation of adaptive immune response	117	0	0.02	631	1	1		CD47.vs.Control	1
GO:0002822	regulation of adaptive immune response based on somatic recombination of immune receptors built from immunoglobulin superfamily domains	155	0	0.02	632	1	1		CD47.vs.Control	1
GO:0002823	negative regulation of adaptive immune response based on somatic recombination of immune receptors built from immunoglobulin superfamily domains	39	0	0.01	633	1	1		CD47.vs.Control	1
GO:0002824	positive regulation of adaptive immune response based on somatic recombination of immune receptors built from immunoglobulin superfamily domains	110	0	0.02	634	1	1		CD47.vs.Control	1
GO:0002825	regulation of T-helper 1 type immune response	28	0	0	635	1	1		CD47.vs.Control	1
GO:0002826	negative regulation of T-helper 1 type immune response	6	0	0	636	1	1		CD47.vs.Control	1
GO:0002827	positive regulation of T-helper 1 type immune response	21	0	0	637	1	1		CD47.vs.Control	1
GO:0002828	regulation of type 2 immune response	30	0	0	638	1	1		CD47.vs.Control	1
GO:0002829	negative regulation of type 2 immune response	14	0	0	639	1	1		CD47.vs.Control	1
GO:0002830	positive regulation of type 2 immune response	15	0	0	640	1	1		CD47.vs.Control	1
GO:0002831	regulation of response to biotic stimulus	128	0	0.02	641	1	1		CD47.vs.Control	1
GO:0002832	negative regulation of response to biotic stimulus	37	0	0.01	642	1	1		CD47.vs.Control	1
GO:0002833	positive regulation of response to biotic stimulus	46	0	0.01	643	1	1		CD47.vs.Control	1
GO:0002834	regulation of response to tumor cell	18	0	0	644	1	1		CD47.vs.Control	1
GO:0002836	positive regulation of response to tumor cell	13	0	0	645	1	1		CD47.vs.Control	1
GO:0002837	regulation of immune response to tumor cell	18	0	0	646	1	1		CD47.vs.Control	1
GO:0002839	positive regulation of immune response to tumor cell	13	0	0	647	1	1		CD47.vs.Control	1
GO:0002855	regulation of natural killer cell mediated immune response to tumor cell	10	0	0	648	1	1		CD47.vs.Control	1
GO:0002857	positive regulation of natural killer cell mediated immune response to tumor cell	7	0	0	649	1	1		CD47.vs.Control	1
GO:0002858	regulation of natural killer cell mediated cytotoxicity directed against tumor cell target	10	0	0	650	1	1		CD47.vs.Control	1
GO:0002860	positive regulation of natural killer cell mediated cytotoxicity directed against tumor cell target	7	0	0	651	1	1		CD47.vs.Control	1
GO:0002861	regulation of inflammatory response to antigenic stimulus	23	0	0	652	1	1		CD47.vs.Control	1
GO:0002862	negative regulation of inflammatory response to antigenic stimulus	11	0	0	653	1	1		CD47.vs.Control	1
GO:0002863	positive regulation of inflammatory response to antigenic stimulus	12	0	0	654	1	1		CD47.vs.Control	1
GO:0002864	regulation of acute inflammatory response to antigenic stimulus	12	0	0	655	1	1		CD47.vs.Control	1
GO:0002866	positive regulation of acute inflammatory response to antigenic stimulus	8	0	0	656	1	1		CD47.vs.Control	1
GO:0002870	T cell anergy	7	0	0	657	1	1		CD47.vs.Control	1
GO:0002883	regulation of hypersensitivity	10	0	0	658	1	1		CD47.vs.Control	1
GO:0002885	positive regulation of hypersensitivity	7	0	0	659	1	1		CD47.vs.Control	1
GO:0002886	regulation of myeloid leukocyte mediated immunity	51	0	0.01	660	1	1		CD47.vs.Control	1
GO:0002887	negative regulation of myeloid leukocyte mediated immunity	8	0	0	661	1	1		CD47.vs.Control	1
GO:0002888	positive regulation of myeloid leukocyte mediated immunity	34	0	0	662	1	1		CD47.vs.Control	1
GO:0002889	regulation of immunoglobulin mediated immune response	53	0	0.01	663	1	1		CD47.vs.Control	1
GO:0002890	negative regulation of immunoglobulin mediated immune response	8	0	0	664	1	1		CD47.vs.Control	1
GO:0002891	positive regulation of immunoglobulin mediated immune response	41	0	0.01	665	1	1		CD47.vs.Control	1
GO:0002892	regulation of type II hypersensitivity	5	0	0	666	1	1		CD47.vs.Control	1
GO:0002894	positive regulation of type II hypersensitivity	5	0	0	667	1	1		CD47.vs.Control	1
GO:0002901	mature B cell apoptotic process	5	0	0	668	1	1		CD47.vs.Control	1
GO:0002902	regulation of B cell apoptotic process	19	0	0	669	1	1		CD47.vs.Control	1
GO:0002903	negative regulation of B cell apoptotic process	12	0	0	670	1	1		CD47.vs.Control	1
GO:0002904	positive regulation of B cell apoptotic process	5	0	0	671	1	1		CD47.vs.Control	1
GO:0002905	regulation of mature B cell apoptotic process	5	0	0	672	1	1		CD47.vs.Control	1
GO:0002906	negative regulation of mature B cell apoptotic process	5	0	0	673	1	1		CD47.vs.Control	1
GO:0002911	regulation of lymphocyte anergy	7	0	0	674	1	1		CD47.vs.Control	1
GO:0002920	regulation of humoral immune response	28	0	0	675	1	1		CD47.vs.Control	1
GO:0002921	negative regulation of humoral immune response	9	0	0	676	1	1		CD47.vs.Control	1
GO:0002922	positive regulation of humoral immune response	13	0	0	677	1	1		CD47.vs.Control	1
GO:0002923	regulation of humoral immune response mediated by circulating immunoglobulin	11	0	0	678	1	1		CD47.vs.Control	1
GO:0002925	positive regulation of humoral immune response mediated by circulating immunoglobulin	6	0	0	679	1	1		CD47.vs.Control	1
GO:0002931	response to ischemia	25	0	0	680	1	1		CD47.vs.Control	1
GO:0002934	desmosome organization	10	0	0	681	1	1		CD47.vs.Control	1
GO:0003006	developmental process involved in reproduction	547	0	0.08	682	1	1		CD47.vs.Control	1
GO:0003007	heart morphogenesis	221	0	0.03	683	1	1		CD47.vs.Control	1
GO:0003008	system process	1169	0	0.16	684	1	1		CD47.vs.Control	1
GO:0003009	skeletal muscle contraction	28	0	0	685	1	1		CD47.vs.Control	1
GO:0003012	muscle system process	291	0	0.04	686	1	1		CD47.vs.Control	1
GO:0003013	circulatory system process	338	0	0.05	687	1	1		CD47.vs.Control	1
GO:0003014	renal system process	64	0	0.01	688	1	1		CD47.vs.Control	1
GO:0003015	heart process	158	0	0.02	689	1	1		CD47.vs.Control	1
GO:0003016	respiratory system process	24	0	0	690	1	1		CD47.vs.Control	1
GO:0003018	vascular process in circulatory system	138	0	0.02	691	1	1		CD47.vs.Control	1
GO:0003044	regulation of systemic arterial blood pressure mediated by a chemical signal	28	0	0	692	1	1		CD47.vs.Control	1
GO:0003056	regulation of vascular smooth muscle contraction	7	0	0	693	1	1		CD47.vs.Control	1
GO:0003057	regulation of the force of heart contraction by chemical signal	6	0	0	694	1	1		CD47.vs.Control	1
GO:0003071	renal system process involved in regulation of systemic arterial blood pressure	17	0	0	695	1	1		CD47.vs.Control	1
GO:0003073	regulation of systemic arterial blood pressure	65	0	0.01	696	1	1		CD47.vs.Control	1
GO:0003081	regulation of systemic arterial blood pressure by renin-angiotensin	18	0	0	697	1	1		CD47.vs.Control	1
GO:0003084	positive regulation of systemic arterial blood pressure	13	0	0	698	1	1		CD47.vs.Control	1
GO:0003085	negative regulation of systemic arterial blood pressure	16	0	0	699	1	1		CD47.vs.Control	1
GO:0003091	renal water homeostasis	8	0	0	700	1	1		CD47.vs.Control	1
GO:0003093	regulation of glomerular filtration	10	0	0	701	1	1		CD47.vs.Control	1
GO:0003094	glomerular filtration	15	0	0	702	1	1		CD47.vs.Control	1
GO:0003128	heart field specification	10	0	0	703	1	1		CD47.vs.Control	1
GO:0003129	heart induction	5	0	0	704	1	1		CD47.vs.Control	1
GO:0003139	secondary heart field specification	6	0	0	705	1	1		CD47.vs.Control	1
GO:0003140	determination of left/right asymmetry in lateral mesoderm	7	0	0	706	1	1		CD47.vs.Control	1
GO:0003143	embryonic heart tube morphogenesis	52	0	0.01	707	1	1		CD47.vs.Control	1
GO:0003148	outflow tract septum morphogenesis	23	0	0	708	1	1		CD47.vs.Control	1
GO:0003149	membranous septum morphogenesis	8	0	0	709	1	1		CD47.vs.Control	1
GO:0003150	muscular septum morphogenesis	5	0	0	710	1	1		CD47.vs.Control	1
GO:0003151	outflow tract morphogenesis	67	0	0.01	711	1	1		CD47.vs.Control	1
GO:0003156	regulation of animal organ formation	27	0	0	712	1	1		CD47.vs.Control	1
GO:0003157	endocardium development	12	0	0	713	1	1		CD47.vs.Control	1
GO:0003158	endothelium development	99	0	0.01	714	1	1		CD47.vs.Control	1
GO:0003159	morphogenesis of an endothelium	13	0	0	715	1	1		CD47.vs.Control	1
GO:0003160	endocardium morphogenesis	6	0	0	716	1	1		CD47.vs.Control	1
GO:0003161	cardiac conduction system development	12	0	0	717	1	1		CD47.vs.Control	1
GO:0003170	heart valve development	50	0	0.01	718	1	1		CD47.vs.Control	1
GO:0003171	atrioventricular valve development	22	0	0	719	1	1		CD47.vs.Control	1
GO:0003174	mitral valve development	12	0	0	720	1	1		CD47.vs.Control	1
GO:0003175	tricuspid valve development	6	0	0	721	1	1		CD47.vs.Control	1
GO:0003176	aortic valve development	15	0	0	722	1	1		CD47.vs.Control	1
GO:0003177	pulmonary valve development	17	0	0	723	1	1		CD47.vs.Control	1
GO:0003179	heart valve morphogenesis	40	0	0.01	724	1	1		CD47.vs.Control	1
GO:0003180	aortic valve morphogenesis	12	0	0	725	1	1		CD47.vs.Control	1
GO:0003181	atrioventricular valve morphogenesis	20	0	0	726	1	1		CD47.vs.Control	1
GO:0003183	mitral valve morphogenesis	11	0	0	727	1	1		CD47.vs.Control	1
GO:0003184	pulmonary valve morphogenesis	14	0	0	728	1	1		CD47.vs.Control	1
GO:0003186	tricuspid valve morphogenesis	6	0	0	729	1	1		CD47.vs.Control	1
GO:0003188	heart valve formation	13	0	0	730	1	1		CD47.vs.Control	1
GO:0003190	atrioventricular valve formation	7	0	0	731	1	1		CD47.vs.Control	1
GO:0003197	endocardial cushion development	35	0	0	732	1	1		CD47.vs.Control	1
GO:0003198	epithelial to mesenchymal transition involved in endocardial cushion formation	12	0	0	733	1	1		CD47.vs.Control	1
GO:0003199	endocardial cushion to mesenchymal transition involved in heart valve formation	5	0	0	734	1	1		CD47.vs.Control	1
GO:0003203	endocardial cushion morphogenesis	26	0	0	735	1	1		CD47.vs.Control	1
GO:0003205	cardiac chamber development	153	0	0.02	736	1	1		CD47.vs.Control	1
GO:0003206	cardiac chamber morphogenesis	116	0	0.02	737	1	1		CD47.vs.Control	1
GO:0003207	cardiac chamber formation	7	0	0	738	1	1		CD47.vs.Control	1
GO:0003208	cardiac ventricle morphogenesis	62	0	0.01	739	1	1		CD47.vs.Control	1
GO:0003209	cardiac atrium morphogenesis	27	0	0	740	1	1		CD47.vs.Control	1
GO:0003211	cardiac ventricle formation	6	0	0	741	1	1		CD47.vs.Control	1
GO:0003214	cardiac left ventricle morphogenesis	14	0	0	742	1	1		CD47.vs.Control	1
GO:0003215	cardiac right ventricle morphogenesis	14	0	0	743	1	1		CD47.vs.Control	1
GO:0003222	ventricular trabecula myocardium morphogenesis	15	0	0	744	1	1		CD47.vs.Control	1
GO:0003223	ventricular compact myocardium morphogenesis	8	0	0	745	1	1		CD47.vs.Control	1
GO:0003228	atrial cardiac muscle tissue development	6	0	0	746	1	1		CD47.vs.Control	1
GO:0003229	ventricular cardiac muscle tissue development	53	0	0.01	747	1	1		CD47.vs.Control	1
GO:0003230	cardiac atrium development	31	0	0	748	1	1		CD47.vs.Control	1
GO:0003231	cardiac ventricle development	115	0	0.02	749	1	1		CD47.vs.Control	1
GO:0003253	cardiac neural crest cell migration involved in outflow tract morphogenesis	5	0	0	750	1	1		CD47.vs.Control	1
GO:0003254	regulation of membrane depolarization	37	0	0.01	751	1	1		CD47.vs.Control	1
GO:0003263	cardioblast proliferation	10	0	0	752	1	1		CD47.vs.Control	1
GO:0003264	regulation of cardioblast proliferation	10	0	0	753	1	1		CD47.vs.Control	1
GO:0003266	regulation of secondary heart field cardioblast proliferation	9	0	0	754	1	1		CD47.vs.Control	1
GO:0003272	endocardial cushion formation	17	0	0	755	1	1		CD47.vs.Control	1
GO:0003278	apoptotic process involved in heart morphogenesis	6	0	0	756	1	1		CD47.vs.Control	1
GO:0003279	cardiac septum development	100	0	0.01	757	1	1		CD47.vs.Control	1
GO:0003281	ventricular septum development	67	0	0.01	758	1	1		CD47.vs.Control	1
GO:0003283	atrial septum development	17	0	0	759	1	1		CD47.vs.Control	1
GO:0003284	septum primum development	5	0	0	760	1	1		CD47.vs.Control	1
GO:0003298	physiological muscle hypertrophy	30	0	0	761	1	1		CD47.vs.Control	1
GO:0003299	muscle hypertrophy in response to stress	18	0	0	762	1	1		CD47.vs.Control	1
GO:0003300	cardiac muscle hypertrophy	79	0	0.01	763	1	1		CD47.vs.Control	1
GO:0003301	physiological cardiac muscle hypertrophy	30	0	0	764	1	1		CD47.vs.Control	1
GO:0003306	Wnt signaling pathway involved in heart development	7	0	0	765	1	1		CD47.vs.Control	1
GO:0003309	type B pancreatic cell differentiation	18	0	0	766	1	1		CD47.vs.Control	1
GO:0003310	pancreatic A cell differentiation	5	0	0	767	1	1		CD47.vs.Control	1
GO:0003323	type B pancreatic cell development	14	0	0	768	1	1		CD47.vs.Control	1
GO:0003330	regulation of extracellular matrix constituent secretion	5	0	0	769	1	1		CD47.vs.Control	1
GO:0003333	amino acid transmembrane transport	51	0	0.01	770	1	1		CD47.vs.Control	1
GO:0003334	keratinocyte development	12	0	0	771	1	1		CD47.vs.Control	1
GO:0003337	mesenchymal to epithelial transition involved in metanephros morphogenesis	5	0	0	772	1	1		CD47.vs.Control	1
GO:0003338	metanephros morphogenesis	14	0	0	773	1	1		CD47.vs.Control	1
GO:0003341	cilium movement	41	0	0.01	774	1	1		CD47.vs.Control	1
GO:0003344	pericardium morphogenesis	7	0	0	775	1	1		CD47.vs.Control	1
GO:0003348	cardiac endothelial cell differentiation	7	0	0	776	1	1		CD47.vs.Control	1
GO:0003351	epithelial cilium movement	17	0	0	777	1	1		CD47.vs.Control	1
GO:0003352	regulation of cilium movement	10	0	0	778	1	1		CD47.vs.Control	1
GO:0003356	regulation of cilium beat frequency	9	0	0	779	1	1		CD47.vs.Control	1
GO:0003382	epithelial cell morphogenesis	36	0	0	780	1	1		CD47.vs.Control	1
GO:0003400	regulation of COPII vesicle coating	5	0	0	781	1	1		CD47.vs.Control	1
GO:0003401	axis elongation	29	0	0	782	1	1		CD47.vs.Control	1
GO:0003402	planar cell polarity pathway involved in axis elongation	5	0	0	783	1	1		CD47.vs.Control	1
GO:0003406	retinal pigment epithelium development	5	0	0	784	1	1		CD47.vs.Control	1
GO:0003407	neural retina development	39	0	0.01	785	1	1		CD47.vs.Control	1
GO:0003413	chondrocyte differentiation involved in endochondral bone morphogenesis	23	0	0	786	1	1		CD47.vs.Control	1
GO:0003414	chondrocyte morphogenesis involved in endochondral bone morphogenesis	12	0	0	787	1	1		CD47.vs.Control	1
GO:0003416	endochondral bone growth	32	0	0	788	1	1		CD47.vs.Control	1
GO:0003417	growth plate cartilage development	27	0	0	789	1	1		CD47.vs.Control	1
GO:0003418	growth plate cartilage chondrocyte differentiation	17	0	0	790	1	1		CD47.vs.Control	1
GO:0003422	growth plate cartilage morphogenesis	12	0	0	791	1	1		CD47.vs.Control	1
GO:0003429	growth plate cartilage chondrocyte morphogenesis	12	0	0	792	1	1		CD47.vs.Control	1
GO:0003433	chondrocyte development involved in endochondral bone morphogenesis	17	0	0	793	1	1		CD47.vs.Control	1
GO:0005975	carbohydrate metabolic process	426	0	0.06	794	1	1		CD47.vs.Control	1
GO:0005976	polysaccharide metabolic process	90	0	0.01	795	1	1		CD47.vs.Control	1
GO:0005977	glycogen metabolic process	63	0	0.01	796	1	1		CD47.vs.Control	1
GO:0005978	glycogen biosynthetic process	34	0	0	797	1	1		CD47.vs.Control	1
GO:0005979	regulation of glycogen biosynthetic process	23	0	0	798	1	1		CD47.vs.Control	1
GO:0005980	glycogen catabolic process	16	0	0	799	1	1		CD47.vs.Control	1
GO:0005981	regulation of glycogen catabolic process	7	0	0	800	1	1		CD47.vs.Control	1
GO:0005984	disaccharide metabolic process	5	0	0	801	1	1		CD47.vs.Control	1
GO:0005996	monosaccharide metabolic process	206	0	0.03	802	1	1		CD47.vs.Control	1
GO:0006000	fructose metabolic process	8	0	0	803	1	1		CD47.vs.Control	1
GO:0006002	fructose 6-phosphate metabolic process	9	0	0	804	1	1		CD47.vs.Control	1
GO:0006003	fructose 2,6-bisphosphate metabolic process	6	0	0	805	1	1		CD47.vs.Control	1
GO:0006004	fucose metabolic process	6	0	0	806	1	1		CD47.vs.Control	1
GO:0006006	glucose metabolic process	155	0	0.02	807	1	1		CD47.vs.Control	1
GO:0006007	glucose catabolic process	12	0	0	808	1	1		CD47.vs.Control	1
GO:0006012	galactose metabolic process	9	0	0	809	1	1		CD47.vs.Control	1
GO:0006013	mannose metabolic process	9	0	0	810	1	1		CD47.vs.Control	1
GO:0006015	5-phosphoribose 1-diphosphate biosynthetic process	6	0	0	811	1	1		CD47.vs.Control	1
GO:0006020	inositol metabolic process	11	0	0	812	1	1		CD47.vs.Control	1
GO:0006022	aminoglycan metabolic process	79	0	0.01	813	1	1		CD47.vs.Control	1
GO:0006023	aminoglycan biosynthetic process	46	0	0.01	814	1	1		CD47.vs.Control	1
GO:0006024	glycosaminoglycan biosynthetic process	38	0	0.01	815	1	1		CD47.vs.Control	1
GO:0006026	aminoglycan catabolic process	19	0	0	816	1	1		CD47.vs.Control	1
GO:0006027	glycosaminoglycan catabolic process	13	0	0	817	1	1		CD47.vs.Control	1
GO:0006029	proteoglycan metabolic process	51	0	0.01	818	1	1		CD47.vs.Control	1
GO:0006030	chitin metabolic process	6	0	0	819	1	1		CD47.vs.Control	1
GO:0006032	chitin catabolic process	6	0	0	820	1	1		CD47.vs.Control	1
GO:0006040	amino sugar metabolic process	37	0	0.01	821	1	1		CD47.vs.Control	1
GO:0006041	glucosamine metabolic process	5	0	0	822	1	1		CD47.vs.Control	1
GO:0006044	N-acetylglucosamine metabolic process	14	0	0	823	1	1		CD47.vs.Control	1
GO:0006047	UDP-N-acetylglucosamine metabolic process	12	0	0	824	1	1		CD47.vs.Control	1
GO:0006048	UDP-N-acetylglucosamine biosynthetic process	6	0	0	825	1	1		CD47.vs.Control	1
GO:0006054	N-acetylneuraminate metabolic process	9	0	0	826	1	1		CD47.vs.Control	1
GO:0006063	uronic acid metabolic process	10	0	0	827	1	1		CD47.vs.Control	1
GO:0006066	alcohol metabolic process	225	0	0.03	828	1	1		CD47.vs.Control	1
GO:0006071	glycerol metabolic process	13	0	0	829	1	1		CD47.vs.Control	1
GO:0006072	glycerol-3-phosphate metabolic process	8	0	0	830	1	1		CD47.vs.Control	1
GO:0006073	cellular glucan metabolic process	63	0	0.01	831	1	1		CD47.vs.Control	1
GO:0006081	cellular aldehyde metabolic process	53	0	0.01	832	1	1		CD47.vs.Control	1
GO:0006082	organic acid metabolic process	739	0	0.1	833	1	1		CD47.vs.Control	1
GO:0006084	acetyl-CoA metabolic process	28	0	0	834	1	1		CD47.vs.Control	1
GO:0006085	acetyl-CoA biosynthetic process	16	0	0	835	1	1		CD47.vs.Control	1
GO:0006086	acetyl-CoA biosynthetic process from pyruvate	11	0	0	836	1	1		CD47.vs.Control	1
GO:0006089	lactate metabolic process	18	0	0	837	1	1		CD47.vs.Control	1
GO:0006090	pyruvate metabolic process	87	0	0.01	838	1	1		CD47.vs.Control	1
GO:0006091	generation of precursor metabolites and energy	297	0	0.04	839	1	1		CD47.vs.Control	1
GO:0006094	gluconeogenesis	58	0	0.01	840	1	1		CD47.vs.Control	1
GO:0006096	glycolytic process	64	0	0.01	841	1	1		CD47.vs.Control	1
GO:0006098	pentose-phosphate shunt	12	0	0	842	1	1		CD47.vs.Control	1
GO:0006099	tricarboxylic acid cycle	26	0	0	843	1	1		CD47.vs.Control	1
GO:0006101	citrate metabolic process	30	0	0	844	1	1		CD47.vs.Control	1
GO:0006102	isocitrate metabolic process	6	0	0	845	1	1		CD47.vs.Control	1
GO:0006103	2-oxoglutarate metabolic process	17	0	0	846	1	1		CD47.vs.Control	1
GO:0006104	succinyl-CoA metabolic process	5	0	0	847	1	1		CD47.vs.Control	1
GO:0006105	succinate metabolic process	10	0	0	848	1	1		CD47.vs.Control	1
GO:0006107	oxaloacetate metabolic process	12	0	0	849	1	1		CD47.vs.Control	1
GO:0006108	malate metabolic process	6	0	0	850	1	1		CD47.vs.Control	1
GO:0006109	regulation of carbohydrate metabolic process	142	0	0.02	851	1	1		CD47.vs.Control	1
GO:0006110	regulation of glycolytic process	34	0	0	852	1	1		CD47.vs.Control	1
GO:0006111	regulation of gluconeogenesis	41	0	0.01	853	1	1		CD47.vs.Control	1
GO:0006112	energy reserve metabolic process	66	0	0.01	854	1	1		CD47.vs.Control	1
GO:0006113	fermentation	5	0	0	855	1	1		CD47.vs.Control	1
GO:0006116	NADH oxidation	5	0	0	856	1	1		CD47.vs.Control	1
GO:0006119	oxidative phosphorylation	78	0	0.01	857	1	1		CD47.vs.Control	1
GO:0006120	mitochondrial electron transport, NADH to ubiquinone	18	0	0	858	1	1		CD47.vs.Control	1
GO:0006122	mitochondrial electron transport, ubiquinol to cytochrome c	11	0	0	859	1	1		CD47.vs.Control	1
GO:0006123	mitochondrial electron transport, cytochrome c to oxygen	9	0	0	860	1	1		CD47.vs.Control	1
GO:0006139	nucleobase-containing compound metabolic process	4060	0	0.56	861	1	1		CD47.vs.Control	1
GO:0006140	regulation of nucleotide metabolic process	82	0	0.01	862	1	1		CD47.vs.Control	1
GO:0006144	purine nucleobase metabolic process	19	0	0	863	1	1		CD47.vs.Control	1
GO:0006145	purine nucleobase catabolic process	6	0	0	864	1	1		CD47.vs.Control	1
GO:0006152	purine nucleoside catabolic process	8	0	0	865	1	1		CD47.vs.Control	1
GO:0006163	purine nucleotide metabolic process	354	0	0.05	866	1	1		CD47.vs.Control	1
GO:0006164	purine nucleotide biosynthetic process	189	0	0.03	867	1	1		CD47.vs.Control	1
GO:0006165	nucleoside diphosphate phosphorylation	78	0	0.01	868	1	1		CD47.vs.Control	1
GO:0006167	AMP biosynthetic process	6	0	0	869	1	1		CD47.vs.Control	1
GO:0006171	cAMP biosynthetic process	6	0	0	870	1	1		CD47.vs.Control	1
GO:0006182	cGMP biosynthetic process	6	0	0	871	1	1		CD47.vs.Control	1
GO:0006183	GTP biosynthetic process	9	0	0	872	1	1		CD47.vs.Control	1
GO:0006188	IMP biosynthetic process	8	0	0	873	1	1		CD47.vs.Control	1
GO:0006195	purine nucleotide catabolic process	24	0	0	874	1	1		CD47.vs.Control	1
GO:0006206	pyrimidine nucleobase metabolic process	12	0	0	875	1	1		CD47.vs.Control	1
GO:0006207	'de novo' pyrimidine nucleobase biosynthetic process	5	0	0	876	1	1		CD47.vs.Control	1
GO:0006213	pyrimidine nucleoside metabolic process	23	0	0	877	1	1		CD47.vs.Control	1
GO:0006220	pyrimidine nucleotide metabolic process	31	0	0	878	1	1		CD47.vs.Control	1
GO:0006221	pyrimidine nucleotide biosynthetic process	24	0	0	879	1	1		CD47.vs.Control	1
GO:0006228	UTP biosynthetic process	7	0	0	880	1	1		CD47.vs.Control	1
GO:0006241	CTP biosynthetic process	8	0	0	881	1	1		CD47.vs.Control	1
GO:0006259	DNA metabolic process	820	0	0.11	882	1	1		CD47.vs.Control	1
GO:0006260	DNA replication	229	0	0.03	883	1	1		CD47.vs.Control	1
GO:0006261	DNA-dependent DNA replication	130	0	0.02	884	1	1		CD47.vs.Control	1
GO:0006264	mitochondrial DNA replication	14	0	0	885	1	1		CD47.vs.Control	1
GO:0006265	DNA topological change	8	0	0	886	1	1		CD47.vs.Control	1
GO:0006266	DNA ligation	11	0	0	887	1	1		CD47.vs.Control	1
GO:0006268	DNA unwinding involved in DNA replication	9	0	0	888	1	1		CD47.vs.Control	1
GO:0006270	DNA replication initiation	28	0	0	889	1	1		CD47.vs.Control	1
GO:0006271	DNA strand elongation involved in DNA replication	13	0	0	890	1	1		CD47.vs.Control	1
GO:0006273	lagging strand elongation	8	0	0	891	1	1		CD47.vs.Control	1
GO:0006275	regulation of DNA replication	97	0	0.01	892	1	1		CD47.vs.Control	1
GO:0006278	RNA-dependent DNA biosynthetic process	59	0	0.01	893	1	1		CD47.vs.Control	1
GO:0006281	DNA repair	427	0	0.06	894	1	1		CD47.vs.Control	1
GO:0006282	regulation of DNA repair	103	0	0.01	895	1	1		CD47.vs.Control	1
GO:0006283	transcription-coupled nucleotide-excision repair	10	0	0	896	1	1		CD47.vs.Control	1
GO:0006284	base-excision repair	39	0	0.01	897	1	1		CD47.vs.Control	1
GO:0006287	base-excision repair, gap-filling	5	0	0	898	1	1		CD47.vs.Control	1
GO:0006289	nucleotide-excision repair	53	0	0.01	899	1	1		CD47.vs.Control	1
GO:0006290	pyrimidine dimer repair	8	0	0	900	1	1		CD47.vs.Control	1
GO:0006297	nucleotide-excision repair, DNA gap filling	5	0	0	901	1	1		CD47.vs.Control	1
GO:0006298	mismatch repair	24	0	0	902	1	1		CD47.vs.Control	1
GO:0006301	postreplication repair	23	0	0	903	1	1		CD47.vs.Control	1
GO:0006302	double-strand break repair	196	0	0.03	904	1	1		CD47.vs.Control	1
GO:0006303	double-strand break repair via nonhomologous end joining	43	0	0.01	905	1	1		CD47.vs.Control	1
GO:0006304	DNA modification	83	0	0.01	906	1	1		CD47.vs.Control	1
GO:0006305	DNA alkylation	60	0	0.01	907	1	1		CD47.vs.Control	1
GO:0006306	DNA methylation	60	0	0.01	908	1	1		CD47.vs.Control	1
GO:0006307	DNA dealkylation involved in DNA repair	6	0	0	909	1	1		CD47.vs.Control	1
GO:0006308	DNA catabolic process	28	0	0	910	1	1		CD47.vs.Control	1
GO:0006309	apoptotic DNA fragmentation	18	0	0	911	1	1		CD47.vs.Control	1
GO:0006310	DNA recombination	247	0	0.03	912	1	1		CD47.vs.Control	1
GO:0006312	mitotic recombination	25	0	0	913	1	1		CD47.vs.Control	1
GO:0006323	DNA packaging	151	0	0.02	914	1	1		CD47.vs.Control	1
GO:0006325	chromatin organization	647	0	0.09	915	1	1		CD47.vs.Control	1
GO:0006333	chromatin assembly or disassembly	135	0	0.02	916	1	1		CD47.vs.Control	1
GO:0006334	nucleosome assembly	93	0	0.01	917	1	1		CD47.vs.Control	1
GO:0006335	DNA replication-dependent nucleosome assembly	31	0	0	918	1	1		CD47.vs.Control	1
GO:0006336	DNA replication-independent nucleosome assembly	29	0	0	919	1	1		CD47.vs.Control	1
GO:0006337	nucleosome disassembly	14	0	0	920	1	1		CD47.vs.Control	1
GO:0006338	chromatin remodeling	113	0	0.02	921	1	1		CD47.vs.Control	1
GO:0006342	chromatin silencing	67	0	0.01	922	1	1		CD47.vs.Control	1
GO:0006346	methylation-dependent chromatin silencing	15	0	0	923	1	1		CD47.vs.Control	1
GO:0006348	chromatin silencing at telomere	5	0	0	924	1	1		CD47.vs.Control	1
GO:0006349	regulation of gene expression by genetic imprinting	21	0	0	925	1	1		CD47.vs.Control	1
GO:0006351	transcription, DNA-templated	2373	0	0.33	926	1	1		CD47.vs.Control	1
GO:0006352	DNA-templated transcription, initiation	91	0	0.01	927	1	1		CD47.vs.Control	1
GO:0006353	DNA-templated transcription, termination	22	0	0	928	1	1		CD47.vs.Control	1
GO:0006354	DNA-templated transcription, elongation	58	0	0.01	929	1	1		CD47.vs.Control	1
GO:0006355	regulation of transcription, DNA-templated	2284	0	0.32	930	1	1		CD47.vs.Control	1
GO:0006356	regulation of transcription by RNA polymerase I	33	0	0	931	1	1		CD47.vs.Control	1
GO:0006357	regulation of transcription by RNA polymerase II	1599	0	0.22	932	1	1		CD47.vs.Control	1
GO:0006359	regulation of transcription by RNA polymerase III	16	0	0	933	1	1		CD47.vs.Control	1
GO:0006360	transcription by RNA polymerase I	48	0	0.01	934	1	1		CD47.vs.Control	1
GO:0006361	transcription initiation from RNA polymerase I promoter	6	0	0	935	1	1		CD47.vs.Control	1
GO:0006363	termination of RNA polymerase I transcription	5	0	0	936	1	1		CD47.vs.Control	1
GO:0006364	rRNA processing	180	0	0.02	937	1	1		CD47.vs.Control	1
GO:0006366	transcription by RNA polymerase II	1654	0	0.23	938	1	1		CD47.vs.Control	1
GO:0006367	transcription initiation from RNA polymerase II promoter	59	0	0.01	939	1	1		CD47.vs.Control	1
GO:0006368	transcription elongation from RNA polymerase II promoter	44	0	0.01	940	1	1		CD47.vs.Control	1
GO:0006369	termination of RNA polymerase II transcription	7	0	0	941	1	1		CD47.vs.Control	1
GO:0006370	7-methylguanosine mRNA capping	6	0	0	942	1	1		CD47.vs.Control	1
GO:0006376	mRNA splice site selection	26	0	0	943	1	1		CD47.vs.Control	1
GO:0006378	mRNA polyadenylation	42	0	0.01	944	1	1		CD47.vs.Control	1
GO:0006379	mRNA cleavage	17	0	0	945	1	1		CD47.vs.Control	1
GO:0006382	adenosine to inosine editing	5	0	0	946	1	1		CD47.vs.Control	1
GO:0006383	transcription by RNA polymerase III	33	0	0	947	1	1		CD47.vs.Control	1
GO:0006384	transcription initiation from RNA polymerase III promoter	7	0	0	948	1	1		CD47.vs.Control	1
GO:0006388	tRNA splicing, via endonucleolytic cleavage and ligation	10	0	0	949	1	1		CD47.vs.Control	1
GO:0006390	mitochondrial transcription	16	0	0	950	1	1		CD47.vs.Control	1
GO:0006396	RNA processing	751	0	0.1	951	1	1		CD47.vs.Control	1
GO:0006397	mRNA processing	401	0	0.06	952	1	1		CD47.vs.Control	1
GO:0006398	mRNA 3'-end processing by stem-loop binding and cleavage	5	0	0	953	1	1		CD47.vs.Control	1
GO:0006399	tRNA metabolic process	159	0	0.02	954	1	1		CD47.vs.Control	1
GO:0006400	tRNA modification	66	0	0.01	955	1	1		CD47.vs.Control	1
GO:0006401	RNA catabolic process	200	0	0.03	956	1	1		CD47.vs.Control	1
GO:0006402	mRNA catabolic process	174	0	0.02	957	1	1		CD47.vs.Control	1
GO:0006403	RNA localization	166	0	0.02	958	1	1		CD47.vs.Control	1
GO:0006405	RNA export from nucleus	76	0	0.01	959	1	1		CD47.vs.Control	1
GO:0006406	mRNA export from nucleus	47	0	0.01	960	1	1		CD47.vs.Control	1
GO:0006412	translation	528	0	0.07	961	1	1		CD47.vs.Control	1
GO:0006413	translational initiation	101	0	0.01	962	1	1		CD47.vs.Control	1
GO:0006414	translational elongation	43	0	0.01	963	1	1		CD47.vs.Control	1
GO:0006415	translational termination	13	0	0	964	1	1		CD47.vs.Control	1
GO:0006417	regulation of translation	287	0	0.04	965	1	1		CD47.vs.Control	1
GO:0006418	tRNA aminoacylation for protein translation	41	0	0.01	966	1	1		CD47.vs.Control	1
GO:0006446	regulation of translational initiation	56	0	0.01	967	1	1		CD47.vs.Control	1
GO:0006448	regulation of translational elongation	17	0	0	968	1	1		CD47.vs.Control	1
GO:0006449	regulation of translational termination	5	0	0	969	1	1		CD47.vs.Control	1
GO:0006450	regulation of translational fidelity	9	0	0	970	1	1		CD47.vs.Control	1
GO:0006451	translational readthrough	7	0	0	971	1	1		CD47.vs.Control	1
GO:0006457	protein folding	137	0	0.02	972	1	1		CD47.vs.Control	1
GO:0006458	'de novo' protein folding	35	0	0	973	1	1		CD47.vs.Control	1
GO:0006464	cellular protein modification process	2920	0	0.4	974	1	1		CD47.vs.Control	1
GO:0006465	signal peptide processing	12	0	0	975	1	1		CD47.vs.Control	1
GO:0006468	protein phosphorylation	1514	0	0.21	976	1	1		CD47.vs.Control	1
GO:0006469	negative regulation of protein kinase activity	175	0	0.02	977	1	1		CD47.vs.Control	1
GO:0006470	protein dephosphorylation	217	0	0.03	978	1	1		CD47.vs.Control	1
GO:0006471	protein ADP-ribosylation	30	0	0	979	1	1		CD47.vs.Control	1
GO:0006473	protein acetylation	170	0	0.02	980	1	1		CD47.vs.Control	1
GO:0006474	N-terminal protein amino acid acetylation	15	0	0	981	1	1		CD47.vs.Control	1
GO:0006475	internal protein amino acid acetylation	135	0	0.02	982	1	1		CD47.vs.Control	1
GO:0006476	protein deacetylation	86	0	0.01	983	1	1		CD47.vs.Control	1
GO:0006479	protein methylation	159	0	0.02	984	1	1		CD47.vs.Control	1
GO:0006482	protein demethylation	28	0	0	985	1	1		CD47.vs.Control	1
GO:0006486	protein glycosylation	153	0	0.02	986	1	1		CD47.vs.Control	1
GO:0006487	protein N-linked glycosylation	53	0	0.01	987	1	1		CD47.vs.Control	1
GO:0006488	dolichol-linked oligosaccharide biosynthetic process	8	0	0	988	1	1		CD47.vs.Control	1
GO:0006490	oligosaccharide-lipid intermediate biosynthetic process	11	0	0	989	1	1		CD47.vs.Control	1
GO:0006491	N-glycan processing	12	0	0	990	1	1		CD47.vs.Control	1
GO:0006493	protein O-linked glycosylation	45	0	0.01	991	1	1		CD47.vs.Control	1
GO:0006497	protein lipidation	82	0	0.01	992	1	1		CD47.vs.Control	1
GO:0006501	C-terminal protein lipidation	6	0	0	993	1	1		CD47.vs.Control	1
GO:0006505	GPI anchor metabolic process	32	0	0	994	1	1		CD47.vs.Control	1
GO:0006506	GPI anchor biosynthetic process	31	0	0	995	1	1		CD47.vs.Control	1
GO:0006508	proteolysis	1287	0	0.18	996	1	1		CD47.vs.Control	1
GO:0006509	membrane protein ectodomain proteolysis	39	0	0.01	997	1	1		CD47.vs.Control	1
GO:0006511	ubiquitin-dependent protein catabolic process	504	0	0.07	998	1	1		CD47.vs.Control	1
GO:0006513	protein monoubiquitination	64	0	0.01	999	1	1		CD47.vs.Control	1
GO:0006515	protein quality control for misfolded or incompletely synthesized proteins	26	0	0	1000	1	1		CD47.vs.Control	1
GO:0006516	glycoprotein catabolic process	15	0	0	1001	1	1		CD47.vs.Control	1
GO:0006517	protein deglycosylation	12	0	0	1002	1	1		CD47.vs.Control	1
GO:0006518	peptide metabolic process	663	0	0.09	1003	1	1		CD47.vs.Control	1
GO:0006520	cellular amino acid metabolic process	224	0	0.03	1004	1	1		CD47.vs.Control	1
GO:0006521	regulation of cellular amino acid metabolic process	9	0	0	1005	1	1		CD47.vs.Control	1
GO:0006525	arginine metabolic process	16	0	0	1006	1	1		CD47.vs.Control	1
GO:0006527	arginine catabolic process	11	0	0	1007	1	1		CD47.vs.Control	1
GO:0006531	aspartate metabolic process	8	0	0	1008	1	1		CD47.vs.Control	1
GO:0006534	cysteine metabolic process	12	0	0	1009	1	1		CD47.vs.Control	1
GO:0006536	glutamate metabolic process	26	0	0	1010	1	1		CD47.vs.Control	1
GO:0006541	glutamine metabolic process	19	0	0	1011	1	1		CD47.vs.Control	1
GO:0006544	glycine metabolic process	9	0	0	1012	1	1		CD47.vs.Control	1
GO:0006547	histidine metabolic process	5	0	0	1013	1	1		CD47.vs.Control	1
GO:0006549	isoleucine metabolic process	5	0	0	1014	1	1		CD47.vs.Control	1
GO:0006551	leucine metabolic process	7	0	0	1015	1	1		CD47.vs.Control	1
GO:0006555	methionine metabolic process	12	0	0	1016	1	1		CD47.vs.Control	1
GO:0006558	L-phenylalanine metabolic process	6	0	0	1017	1	1		CD47.vs.Control	1
GO:0006560	proline metabolic process	8	0	0	1018	1	1		CD47.vs.Control	1
GO:0006563	L-serine metabolic process	7	0	0	1019	1	1		CD47.vs.Control	1
GO:0006568	tryptophan metabolic process	9	0	0	1020	1	1		CD47.vs.Control	1
GO:0006569	tryptophan catabolic process	6	0	0	1021	1	1		CD47.vs.Control	1
GO:0006570	tyrosine metabolic process	5	0	0	1022	1	1		CD47.vs.Control	1
GO:0006573	valine metabolic process	7	0	0	1023	1	1		CD47.vs.Control	1
GO:0006575	cellular modified amino acid metabolic process	138	0	0.02	1024	1	1		CD47.vs.Control	1
GO:0006576	cellular biogenic amine metabolic process	33	0	0	1025	1	1		CD47.vs.Control	1
GO:0006577	amino-acid betaine metabolic process	12	0	0	1026	1	1		CD47.vs.Control	1
GO:0006582	melanin metabolic process	16	0	0	1027	1	1		CD47.vs.Control	1
GO:0006584	catecholamine metabolic process	36	0	0	1028	1	1		CD47.vs.Control	1
GO:0006586	indolalkylamine metabolic process	9	0	0	1029	1	1		CD47.vs.Control	1
GO:0006590	thyroid hormone generation	9	0	0	1030	1	1		CD47.vs.Control	1
GO:0006591	ornithine metabolic process	8	0	0	1031	1	1		CD47.vs.Control	1
GO:0006595	polyamine metabolic process	15	0	0	1032	1	1		CD47.vs.Control	1
GO:0006596	polyamine biosynthetic process	11	0	0	1033	1	1		CD47.vs.Control	1
GO:0006600	creatine metabolic process	5	0	0	1034	1	1		CD47.vs.Control	1
GO:0006605	protein targeting	228	0	0.03	1035	1	1		CD47.vs.Control	1
GO:0006606	protein import into nucleus	149	0	0.02	1036	1	1		CD47.vs.Control	1
GO:0006607	NLS-bearing protein import into nucleus	13	0	0	1037	1	1		CD47.vs.Control	1
GO:0006610	ribosomal protein import into nucleus	7	0	0	1038	1	1		CD47.vs.Control	1
GO:0006611	protein export from nucleus	120	0	0.02	1039	1	1		CD47.vs.Control	1
GO:0006612	protein targeting to membrane	90	0	0.01	1040	1	1		CD47.vs.Control	1
GO:0006613	cotranslational protein targeting to membrane	17	0	0	1041	1	1		CD47.vs.Control	1
GO:0006614	SRP-dependent cotranslational protein targeting to membrane	16	0	0	1042	1	1		CD47.vs.Control	1
GO:0006616	SRP-dependent cotranslational protein targeting to membrane, translocation	10	0	0	1043	1	1		CD47.vs.Control	1
GO:0006620	posttranslational protein targeting to endoplasmic reticulum membrane	13	0	0	1044	1	1		CD47.vs.Control	1
GO:0006621	protein retention in ER lumen	7	0	0	1045	1	1		CD47.vs.Control	1
GO:0006622	protein targeting to lysosome	17	0	0	1046	1	1		CD47.vs.Control	1
GO:0006623	protein targeting to vacuole	27	0	0	1047	1	1		CD47.vs.Control	1
GO:0006625	protein targeting to peroxisome	16	0	0	1048	1	1		CD47.vs.Control	1
GO:0006626	protein targeting to mitochondrion	67	0	0.01	1049	1	1		CD47.vs.Control	1
GO:0006627	protein processing involved in protein targeting to mitochondrion	7	0	0	1050	1	1		CD47.vs.Control	1
GO:0006629	lipid metabolic process	941	0	0.13	1051	1	1		CD47.vs.Control	1
GO:0006631	fatty acid metabolic process	274	0	0.04	1052	1	1		CD47.vs.Control	1
GO:0006633	fatty acid biosynthetic process	104	0	0.01	1053	1	1		CD47.vs.Control	1
GO:0006635	fatty acid beta-oxidation	60	0	0.01	1054	1	1		CD47.vs.Control	1
GO:0006636	unsaturated fatty acid biosynthetic process	33	0	0	1055	1	1		CD47.vs.Control	1
GO:0006637	acyl-CoA metabolic process	62	0	0.01	1056	1	1		CD47.vs.Control	1
GO:0006638	neutral lipid metabolic process	96	0	0.01	1057	1	1		CD47.vs.Control	1
GO:0006639	acylglycerol metabolic process	94	0	0.01	1058	1	1		CD47.vs.Control	1
GO:0006641	triglyceride metabolic process	73	0	0.01	1059	1	1		CD47.vs.Control	1
GO:0006643	membrane lipid metabolic process	138	0	0.02	1060	1	1		CD47.vs.Control	1
GO:0006644	phospholipid metabolic process	299	0	0.04	1061	1	1		CD47.vs.Control	1
GO:0006646	phosphatidylethanolamine biosynthetic process	9	0	0	1062	1	1		CD47.vs.Control	1
GO:0006650	glycerophospholipid metabolic process	196	0	0.03	1063	1	1		CD47.vs.Control	1
GO:0006654	phosphatidic acid biosynthetic process	10	0	0	1064	1	1		CD47.vs.Control	1
GO:0006655	phosphatidylglycerol biosynthetic process	6	0	0	1065	1	1		CD47.vs.Control	1
GO:0006656	phosphatidylcholine biosynthetic process	16	0	0	1066	1	1		CD47.vs.Control	1
GO:0006658	phosphatidylserine metabolic process	10	0	0	1067	1	1		CD47.vs.Control	1
GO:0006661	phosphatidylinositol biosynthetic process	56	0	0.01	1068	1	1		CD47.vs.Control	1
GO:0006662	glycerol ether metabolic process	12	0	0	1069	1	1		CD47.vs.Control	1
GO:0006664	glycolipid metabolic process	71	0	0.01	1070	1	1		CD47.vs.Control	1
GO:0006665	sphingolipid metabolic process	99	0	0.01	1071	1	1		CD47.vs.Control	1
GO:0006670	sphingosine metabolic process	10	0	0	1072	1	1		CD47.vs.Control	1
GO:0006672	ceramide metabolic process	64	0	0.01	1073	1	1		CD47.vs.Control	1
GO:0006677	glycosylceramide metabolic process	15	0	0	1074	1	1		CD47.vs.Control	1
GO:0006678	glucosylceramide metabolic process	6	0	0	1075	1	1		CD47.vs.Control	1
GO:0006681	galactosylceramide metabolic process	7	0	0	1076	1	1		CD47.vs.Control	1
GO:0006684	sphingomyelin metabolic process	14	0	0	1077	1	1		CD47.vs.Control	1
GO:0006685	sphingomyelin catabolic process	5	0	0	1078	1	1		CD47.vs.Control	1
GO:0006686	sphingomyelin biosynthetic process	6	0	0	1079	1	1		CD47.vs.Control	1
GO:0006687	glycosphingolipid metabolic process	34	0	0	1080	1	1		CD47.vs.Control	1
GO:0006688	glycosphingolipid biosynthetic process	15	0	0	1081	1	1		CD47.vs.Control	1
GO:0006689	ganglioside catabolic process	5	0	0	1082	1	1		CD47.vs.Control	1
GO:0006690	icosanoid metabolic process	59	0	0.01	1083	1	1		CD47.vs.Control	1
GO:0006691	leukotriene metabolic process	14	0	0	1084	1	1		CD47.vs.Control	1
GO:0006692	prostanoid metabolic process	30	0	0	1085	1	1		CD47.vs.Control	1
GO:0006693	prostaglandin metabolic process	30	0	0	1086	1	1		CD47.vs.Control	1
GO:0006694	steroid biosynthetic process	106	0	0.01	1087	1	1		CD47.vs.Control	1
GO:0006695	cholesterol biosynthetic process	35	0	0	1088	1	1		CD47.vs.Control	1
GO:0006699	bile acid biosynthetic process	10	0	0	1089	1	1		CD47.vs.Control	1
GO:0006700	C21-steroid hormone biosynthetic process	12	0	0	1090	1	1		CD47.vs.Control	1
GO:0006701	progesterone biosynthetic process	5	0	0	1091	1	1		CD47.vs.Control	1
GO:0006702	androgen biosynthetic process	5	0	0	1092	1	1		CD47.vs.Control	1
GO:0006704	glucocorticoid biosynthetic process	10	0	0	1093	1	1		CD47.vs.Control	1
GO:0006705	mineralocorticoid biosynthetic process	6	0	0	1094	1	1		CD47.vs.Control	1
GO:0006706	steroid catabolic process	15	0	0	1095	1	1		CD47.vs.Control	1
GO:0006707	cholesterol catabolic process	5	0	0	1096	1	1		CD47.vs.Control	1
GO:0006720	isoprenoid metabolic process	54	0	0.01	1097	1	1		CD47.vs.Control	1
GO:0006721	terpenoid metabolic process	35	0	0	1098	1	1		CD47.vs.Control	1
GO:0006725	cellular aromatic compound metabolic process	4192	0	0.58	1099	1	1		CD47.vs.Control	1
GO:0006729	tetrahydrobiopterin biosynthetic process	7	0	0	1100	1	1		CD47.vs.Control	1
GO:0006730	one-carbon metabolic process	21	0	0	1101	1	1		CD47.vs.Control	1
GO:0006732	coenzyme metabolic process	266	0	0.04	1102	1	1		CD47.vs.Control	1
GO:0006733	oxidoreduction coenzyme metabolic process	144	0	0.02	1103	1	1		CD47.vs.Control	1
GO:0006734	NADH metabolic process	25	0	0	1104	1	1		CD47.vs.Control	1
GO:0006735	NADH regeneration	5	0	0	1105	1	1		CD47.vs.Control	1
GO:0006739	NADP metabolic process	32	0	0	1106	1	1		CD47.vs.Control	1
GO:0006743	ubiquinone metabolic process	17	0	0	1107	1	1		CD47.vs.Control	1
GO:0006744	ubiquinone biosynthetic process	16	0	0	1108	1	1		CD47.vs.Control	1
GO:0006749	glutathione metabolic process	46	0	0.01	1109	1	1		CD47.vs.Control	1
GO:0006750	glutathione biosynthetic process	11	0	0	1110	1	1		CD47.vs.Control	1
GO:0006751	glutathione catabolic process	5	0	0	1111	1	1		CD47.vs.Control	1
GO:0006753	nucleoside phosphate metabolic process	462	0	0.06	1112	1	1		CD47.vs.Control	1
GO:0006754	ATP biosynthetic process	100	0	0.01	1113	1	1		CD47.vs.Control	1
GO:0006757	ATP generation from ADP	65	0	0.01	1114	1	1		CD47.vs.Control	1
GO:0006760	folic acid-containing compound metabolic process	22	0	0	1115	1	1		CD47.vs.Control	1
GO:0006766	vitamin metabolic process	54	0	0.01	1116	1	1		CD47.vs.Control	1
GO:0006767	water-soluble vitamin metabolic process	27	0	0	1117	1	1		CD47.vs.Control	1
GO:0006775	fat-soluble vitamin metabolic process	23	0	0	1118	1	1		CD47.vs.Control	1
GO:0006777	Mo-molybdopterin cofactor biosynthetic process	6	0	0	1119	1	1		CD47.vs.Control	1
GO:0006778	porphyrin-containing compound metabolic process	31	0	0	1120	1	1		CD47.vs.Control	1
GO:0006779	porphyrin-containing compound biosynthetic process	23	0	0	1121	1	1		CD47.vs.Control	1
GO:0006783	heme biosynthetic process	19	0	0	1122	1	1		CD47.vs.Control	1
GO:0006790	sulfur compound metabolic process	211	0	0.03	1123	1	1		CD47.vs.Control	1
GO:0006793	phosphorus metabolic process	2471	0	0.34	1124	1	1		CD47.vs.Control	1
GO:0006796	phosphate-containing compound metabolic process	2451	0	0.34	1125	1	1		CD47.vs.Control	1
GO:0006797	polyphosphate metabolic process	6	0	0	1126	1	1		CD47.vs.Control	1
GO:0006798	polyphosphate catabolic process	6	0	0	1127	1	1		CD47.vs.Control	1
GO:0006801	superoxide metabolic process	53	0	0.01	1128	1	1		CD47.vs.Control	1
GO:0006805	xenobiotic metabolic process	50	0	0.01	1129	1	1		CD47.vs.Control	1
GO:0006809	nitric oxide biosynthetic process	65	0	0.01	1130	1	1		CD47.vs.Control	1
GO:0006810	transport	3400	0	0.47	1131	1	1		CD47.vs.Control	1
GO:0006811	ion transport	1090	0	0.15	1132	1	1		CD47.vs.Control	1
GO:0006812	cation transport	782	0	0.11	1133	1	1		CD47.vs.Control	1
GO:0006813	potassium ion transport	152	0	0.02	1134	1	1		CD47.vs.Control	1
GO:0006814	sodium ion transport	151	0	0.02	1135	1	1		CD47.vs.Control	1
GO:0006816	calcium ion transport	311	0	0.04	1136	1	1		CD47.vs.Control	1
GO:0006817	phosphate ion transport	19	0	0	1137	1	1		CD47.vs.Control	1
GO:0006820	anion transport	372	0	0.05	1138	1	1		CD47.vs.Control	1
GO:0006821	chloride transport	57	0	0.01	1139	1	1		CD47.vs.Control	1
GO:0006824	cobalt ion transport	5	0	0	1140	1	1		CD47.vs.Control	1
GO:0006825	copper ion transport	14	0	0	1141	1	1		CD47.vs.Control	1
GO:0006826	iron ion transport	30	0	0	1142	1	1		CD47.vs.Control	1
GO:0006828	manganese ion transport	10	0	0	1143	1	1		CD47.vs.Control	1
GO:0006829	zinc ion transport	27	0	0	1144	1	1		CD47.vs.Control	1
GO:0006833	water transport	8	0	0	1145	1	1		CD47.vs.Control	1
GO:0006835	dicarboxylic acid transport	52	0	0.01	1146	1	1		CD47.vs.Control	1
GO:0006836	neurotransmitter transport	210	0	0.03	1147	1	1		CD47.vs.Control	1
GO:0006837	serotonin transport	15	0	0	1148	1	1		CD47.vs.Control	1
GO:0006839	mitochondrial transport	159	0	0.02	1149	1	1		CD47.vs.Control	1
GO:0006851	mitochondrial calcium ion transmembrane transport	15	0	0	1150	1	1		CD47.vs.Control	1
GO:0006855	drug transmembrane transport	49	0	0.01	1151	1	1		CD47.vs.Control	1
GO:0006857	oligopeptide transport	11	0	0	1152	1	1		CD47.vs.Control	1
GO:0006862	nucleotide transport	11	0	0	1153	1	1		CD47.vs.Control	1
GO:0006865	amino acid transport	99	0	0.01	1154	1	1		CD47.vs.Control	1
GO:0006869	lipid transport	247	0	0.03	1155	1	1		CD47.vs.Control	1
GO:0006873	cellular ion homeostasis	482	0	0.07	1156	1	1		CD47.vs.Control	1
GO:0006874	cellular calcium ion homeostasis	340	0	0.05	1157	1	1		CD47.vs.Control	1
GO:0006875	cellular metal ion homeostasis	422	0	0.06	1158	1	1		CD47.vs.Control	1
GO:0006878	cellular copper ion homeostasis	15	0	0	1159	1	1		CD47.vs.Control	1
GO:0006879	cellular iron ion homeostasis	40	0	0.01	1160	1	1		CD47.vs.Control	1
GO:0006882	cellular zinc ion homeostasis	21	0	0	1161	1	1		CD47.vs.Control	1
GO:0006883	cellular sodium ion homeostasis	13	0	0	1162	1	1		CD47.vs.Control	1
GO:0006884	cell volume homeostasis	27	0	0	1163	1	1		CD47.vs.Control	1
GO:0006885	regulation of pH	72	0	0.01	1164	1	1		CD47.vs.Control	1
GO:0006886	intracellular protein transport	814	0	0.11	1165	1	1		CD47.vs.Control	1
GO:0006887	exocytosis	296	0	0.04	1166	1	1		CD47.vs.Control	1
GO:0006888	ER to Golgi vesicle-mediated transport	119	0	0.02	1167	1	1		CD47.vs.Control	1
GO:0006890	retrograde vesicle-mediated transport, Golgi to ER	40	0	0.01	1168	1	1		CD47.vs.Control	1
GO:0006891	intra-Golgi vesicle-mediated transport	26	0	0	1169	1	1		CD47.vs.Control	1
GO:0006892	post-Golgi vesicle-mediated transport	89	0	0.01	1170	1	1		CD47.vs.Control	1
GO:0006893	Golgi to plasma membrane transport	55	0	0.01	1171	1	1		CD47.vs.Control	1
GO:0006895	Golgi to endosome transport	11	0	0	1172	1	1		CD47.vs.Control	1
GO:0006896	Golgi to vacuole transport	15	0	0	1173	1	1		CD47.vs.Control	1
GO:0006897	endocytosis	529	0	0.07	1174	1	1		CD47.vs.Control	1
GO:0006898	receptor-mediated endocytosis	185	0	0.03	1175	1	1		CD47.vs.Control	1
GO:0006900	vesicle budding from membrane	50	0	0.01	1176	1	1		CD47.vs.Control	1
GO:0006901	vesicle coating	15	0	0	1177	1	1		CD47.vs.Control	1
GO:0006903	vesicle targeting	35	0	0	1178	1	1		CD47.vs.Control	1
GO:0006904	vesicle docking involved in exocytosis	42	0	0.01	1179	1	1		CD47.vs.Control	1
GO:0006906	vesicle fusion	75	0	0.01	1180	1	1		CD47.vs.Control	1
GO:0006907	pinocytosis	19	0	0	1181	1	1		CD47.vs.Control	1
GO:0006909	phagocytosis	179	0	0.02	1182	1	1		CD47.vs.Control	1
GO:0006910	phagocytosis, recognition	31	0	0	1183	1	1		CD47.vs.Control	1
GO:0006911	phagocytosis, engulfment	62	0	0.01	1184	1	1		CD47.vs.Control	1
GO:0006913	nucleocytoplasmic transport	283	0	0.04	1185	1	1		CD47.vs.Control	1
GO:0006914	autophagy	344	0	0.05	1186	1	1		CD47.vs.Control	1
GO:0006915	apoptotic process	1598	0	0.22	1187	1	1		CD47.vs.Control	1
GO:0006919	activation of cysteine-type endopeptidase activity involved in apoptotic process	71	0	0.01	1188	1	1		CD47.vs.Control	1
GO:0006921	cellular component disassembly involved in execution phase of apoptosis	28	0	0	1189	1	1		CD47.vs.Control	1
GO:0006924	activation-induced cell death of T cells	14	0	0	1190	1	1		CD47.vs.Control	1
GO:0006925	inflammatory cell apoptotic process	24	0	0	1191	1	1		CD47.vs.Control	1
GO:0006928	movement of cell or subcellular component	1555	0	0.21	1192	1	1		CD47.vs.Control	1
GO:0006929	substrate-dependent cell migration	27	0	0	1193	1	1		CD47.vs.Control	1
GO:0006930	substrate-dependent cell migration, cell extension	8	0	0	1194	1	1		CD47.vs.Control	1
GO:0006935	chemotaxis	440	0	0.06	1195	1	1		CD47.vs.Control	1
GO:0006936	muscle contraction	205	0	0.03	1196	1	1		CD47.vs.Control	1
GO:0006937	regulation of muscle contraction	110	0	0.02	1197	1	1		CD47.vs.Control	1
GO:0006939	smooth muscle contraction	75	0	0.01	1198	1	1		CD47.vs.Control	1
GO:0006940	regulation of smooth muscle contraction	46	0	0.01	1199	1	1		CD47.vs.Control	1
GO:0006941	striated muscle contraction	118	0	0.02	1200	1	1		CD47.vs.Control	1
GO:0006942	regulation of striated muscle contraction	61	0	0.01	1201	1	1		CD47.vs.Control	1
GO:0006949	syncytium formation	52	0	0.01	1202	1	1		CD47.vs.Control	1
GO:0006953	acute-phase response	27	0	0	1203	1	1		CD47.vs.Control	1
GO:0006954	inflammatory response	532	0	0.07	1204	1	1		CD47.vs.Control	1
GO:0006957	complement activation, alternative pathway	9	0	0	1205	1	1		CD47.vs.Control	1
GO:0006968	cellular defense response	12	0	0	1206	1	1		CD47.vs.Control	1
GO:0006970	response to osmotic stress	55	0	0.01	1207	1	1		CD47.vs.Control	1
GO:0006971	hypotonic response	8	0	0	1208	1	1		CD47.vs.Control	1
GO:0006972	hyperosmotic response	12	0	0	1209	1	1		CD47.vs.Control	1
GO:0006974	cellular response to DNA damage stimulus	681	0	0.09	1210	1	1		CD47.vs.Control	1
GO:0006975	DNA damage induced protein phosphorylation	6	0	0	1211	1	1		CD47.vs.Control	1
GO:0006977	DNA damage response, signal transduction by p53 class mediator resulting in cell cycle arrest	10	0	0	1212	1	1		CD47.vs.Control	1
GO:0006978	DNA damage response, signal transduction by p53 class mediator resulting in transcription of p21 class mediator	15	0	0	1213	1	1		CD47.vs.Control	1
GO:0006979	response to oxidative stress	358	0	0.05	1214	1	1		CD47.vs.Control	1
GO:0006983	ER overload response	12	0	0	1215	1	1		CD47.vs.Control	1
GO:0006984	ER-nucleus signaling pathway	32	0	0	1216	1	1		CD47.vs.Control	1
GO:0006986	response to unfolded protein	100	0	0.01	1217	1	1		CD47.vs.Control	1
GO:0006991	response to sterol depletion	10	0	0	1218	1	1		CD47.vs.Control	1
GO:0006995	cellular response to nitrogen starvation	9	0	0	1219	1	1		CD47.vs.Control	1
GO:0006996	organelle organization	3117	0	0.43	1220	1	1		CD47.vs.Control	1
GO:0006997	nucleus organization	107	0	0.01	1221	1	1		CD47.vs.Control	1
GO:0006998	nuclear envelope organization	37	0	0.01	1222	1	1		CD47.vs.Control	1
GO:0006999	nuclear pore organization	14	0	0	1223	1	1		CD47.vs.Control	1
GO:0007000	nucleolus organization	9	0	0	1224	1	1		CD47.vs.Control	1
GO:0007004	telomere maintenance via telomerase	59	0	0.01	1225	1	1		CD47.vs.Control	1
GO:0007005	mitochondrion organization	424	0	0.06	1226	1	1		CD47.vs.Control	1
GO:0007006	mitochondrial membrane organization	93	0	0.01	1227	1	1		CD47.vs.Control	1
GO:0007007	inner mitochondrial membrane organization	28	0	0	1228	1	1		CD47.vs.Control	1
GO:0007008	outer mitochondrial membrane organization	7	0	0	1229	1	1		CD47.vs.Control	1
GO:0007009	plasma membrane organization	71	0	0.01	1230	1	1		CD47.vs.Control	1
GO:0007010	cytoskeleton organization	1127	0	0.16	1231	1	1		CD47.vs.Control	1
GO:0007015	actin filament organization	349	0	0.05	1232	1	1		CD47.vs.Control	1
GO:0007016	cytoskeletal anchoring at plasma membrane	6	0	0	1233	1	1		CD47.vs.Control	1
GO:0007017	microtubule-based process	654	0	0.09	1234	1	1		CD47.vs.Control	1
GO:0007018	microtubule-based movement	223	0	0.03	1235	1	1		CD47.vs.Control	1
GO:0007019	microtubule depolymerization	41	0	0.01	1236	1	1		CD47.vs.Control	1
GO:0007020	microtubule nucleation	25	0	0	1237	1	1		CD47.vs.Control	1
GO:0007021	tubulin complex assembly	7	0	0	1238	1	1		CD47.vs.Control	1
GO:0007026	negative regulation of microtubule depolymerization	28	0	0	1239	1	1		CD47.vs.Control	1
GO:0007028	cytoplasm organization	9	0	0	1240	1	1		CD47.vs.Control	1
GO:0007029	endoplasmic reticulum organization	48	0	0.01	1241	1	1		CD47.vs.Control	1
GO:0007030	Golgi organization	119	0	0.02	1242	1	1		CD47.vs.Control	1
GO:0007031	peroxisome organization	30	0	0	1243	1	1		CD47.vs.Control	1
GO:0007032	endosome organization	46	0	0.01	1244	1	1		CD47.vs.Control	1
GO:0007033	vacuole organization	150	0	0.02	1245	1	1		CD47.vs.Control	1
GO:0007034	vacuolar transport	110	0	0.02	1246	1	1		CD47.vs.Control	1
GO:0007035	vacuolar acidification	17	0	0	1247	1	1		CD47.vs.Control	1
GO:0007039	protein catabolic process in the vacuole	11	0	0	1248	1	1		CD47.vs.Control	1
GO:0007040	lysosome organization	56	0	0.01	1249	1	1		CD47.vs.Control	1
GO:0007041	lysosomal transport	79	0	0.01	1250	1	1		CD47.vs.Control	1
GO:0007042	lysosomal lumen acidification	8	0	0	1251	1	1		CD47.vs.Control	1
GO:0007043	cell-cell junction assembly	82	0	0.01	1252	1	1		CD47.vs.Control	1
GO:0007044	cell-substrate junction assembly	78	0	0.01	1253	1	1		CD47.vs.Control	1
GO:0007045	cell-substrate adherens junction assembly	68	0	0.01	1254	1	1		CD47.vs.Control	1
GO:0007049	cell cycle	1443	0	0.2	1255	1	1		CD47.vs.Control	1
GO:0007050	cell cycle arrest	125	0	0.02	1256	1	1		CD47.vs.Control	1
GO:0007051	spindle organization	156	0	0.02	1257	1	1		CD47.vs.Control	1
GO:0007052	mitotic spindle organization	104	0	0.01	1258	1	1		CD47.vs.Control	1
GO:0007059	chromosome segregation	290	0	0.04	1259	1	1		CD47.vs.Control	1
GO:0007062	sister chromatid cohesion	54	0	0.01	1260	1	1		CD47.vs.Control	1
GO:0007063	regulation of sister chromatid cohesion	22	0	0	1261	1	1		CD47.vs.Control	1
GO:0007064	mitotic sister chromatid cohesion	24	0	0	1262	1	1		CD47.vs.Control	1
GO:0007076	mitotic chromosome condensation	14	0	0	1263	1	1		CD47.vs.Control	1
GO:0007080	mitotic metaphase plate congression	41	0	0.01	1264	1	1		CD47.vs.Control	1
GO:0007088	regulation of mitotic nuclear division	158	0	0.02	1265	1	1		CD47.vs.Control	1
GO:0007091	metaphase/anaphase transition of mitotic cell cycle	56	0	0.01	1266	1	1		CD47.vs.Control	1
GO:0007093	mitotic cell cycle checkpoint	124	0	0.02	1267	1	1		CD47.vs.Control	1
GO:0007094	mitotic spindle assembly checkpoint	36	0	0	1268	1	1		CD47.vs.Control	1
GO:0007095	mitotic G2 DNA damage checkpoint	21	0	0	1269	1	1		CD47.vs.Control	1
GO:0007096	regulation of exit from mitosis	13	0	0	1270	1	1		CD47.vs.Control	1
GO:0007097	nuclear migration	27	0	0	1271	1	1		CD47.vs.Control	1
GO:0007098	centrosome cycle	116	0	0.02	1272	1	1		CD47.vs.Control	1
GO:0007099	centriole replication	33	0	0	1273	1	1		CD47.vs.Control	1
GO:0007100	mitotic centrosome separation	12	0	0	1274	1	1		CD47.vs.Control	1
GO:0007127	meiosis I	91	0	0.01	1275	1	1		CD47.vs.Control	1
GO:0007128	meiotic prophase I	7	0	0	1276	1	1		CD47.vs.Control	1
GO:0007129	synapsis	38	0	0.01	1277	1	1		CD47.vs.Control	1
GO:0007130	synaptonemal complex assembly	18	0	0	1278	1	1		CD47.vs.Control	1
GO:0007131	reciprocal meiotic recombination	42	0	0.01	1279	1	1		CD47.vs.Control	1
GO:0007135	meiosis II	12	0	0	1280	1	1		CD47.vs.Control	1
GO:0007140	male meiotic nuclear division	43	0	0.01	1281	1	1		CD47.vs.Control	1
GO:0007141	male meiosis I	18	0	0	1282	1	1		CD47.vs.Control	1
GO:0007143	female meiotic nuclear division	31	0	0	1283	1	1		CD47.vs.Control	1
GO:0007144	female meiosis I	7	0	0	1284	1	1		CD47.vs.Control	1
GO:0007155	cell adhesion	1005	0	0.14	1285	1	1		CD47.vs.Control	1
GO:0007156	homophilic cell adhesion via plasma membrane adhesion molecules	66	0	0.01	1286	1	1		CD47.vs.Control	1
GO:0007157	heterophilic cell-cell adhesion via plasma membrane cell adhesion molecules	32	0	0	1287	1	1		CD47.vs.Control	1
GO:0007158	neuron cell-cell adhesion	5	0	0	1288	1	1		CD47.vs.Control	1
GO:0007159	leukocyte cell-cell adhesion	282	0	0.04	1289	1	1		CD47.vs.Control	1
GO:0007160	cell-matrix adhesion	166	0	0.02	1290	1	1		CD47.vs.Control	1
GO:0007162	negative regulation of cell adhesion	240	0	0.03	1291	1	1		CD47.vs.Control	1
GO:0007163	establishment or maintenance of cell polarity	186	0	0.03	1292	1	1		CD47.vs.Control	1
GO:0007164	establishment of tissue polarity	49	0	0.01	1293	1	1		CD47.vs.Control	1
GO:0007167	enzyme linked receptor protein signaling pathway	682	0	0.09	1294	1	1		CD47.vs.Control	1
GO:0007168	receptor guanylyl cyclase signaling pathway	7	0	0	1295	1	1		CD47.vs.Control	1
GO:0007169	transmembrane receptor protein tyrosine kinase signaling pathway	439	0	0.06	1296	1	1		CD47.vs.Control	1
GO:0007173	epidermal growth factor receptor signaling pathway	86	0	0.01	1297	1	1		CD47.vs.Control	1
GO:0007175	negative regulation of epidermal growth factor-activated receptor activity	13	0	0	1298	1	1		CD47.vs.Control	1
GO:0007176	regulation of epidermal growth factor-activated receptor activity	24	0	0	1299	1	1		CD47.vs.Control	1
GO:0007178	transmembrane receptor protein serine/threonine kinase signaling pathway	253	0	0.03	1300	1	1		CD47.vs.Control	1
GO:0007179	transforming growth factor beta receptor signaling pathway	144	0	0.02	1301	1	1		CD47.vs.Control	1
GO:0007182	common-partner SMAD protein phosphorylation	5	0	0	1302	1	1		CD47.vs.Control	1
GO:0007183	SMAD protein complex assembly	12	0	0	1303	1	1		CD47.vs.Control	1
GO:0007186	G protein-coupled receptor signaling pathway	544	0	0.08	1304	1	1		CD47.vs.Control	1
GO:0007187	G protein-coupled receptor signaling pathway, coupled to cyclic nucleotide second messenger	134	0	0.02	1305	1	1		CD47.vs.Control	1
GO:0007188	adenylate cyclase-modulating G protein-coupled receptor signaling pathway	124	0	0.02	1306	1	1		CD47.vs.Control	1
GO:0007189	adenylate cyclase-activating G protein-coupled receptor signaling pathway	77	0	0.01	1307	1	1		CD47.vs.Control	1
GO:0007190	activation of adenylate cyclase activity	10	0	0	1308	1	1		CD47.vs.Control	1
GO:0007191	adenylate cyclase-activating dopamine receptor signaling pathway	7	0	0	1309	1	1		CD47.vs.Control	1
GO:0007193	adenylate cyclase-inhibiting G protein-coupled receptor signaling pathway	40	0	0.01	1310	1	1		CD47.vs.Control	1
GO:0007194	negative regulation of adenylate cyclase activity	9	0	0	1311	1	1		CD47.vs.Control	1
GO:0007200	phospholipase C-activating G protein-coupled receptor signaling pathway	63	0	0.01	1312	1	1		CD47.vs.Control	1
GO:0007202	activation of phospholipase C activity	11	0	0	1313	1	1		CD47.vs.Control	1
GO:0007204	positive regulation of cytosolic calcium ion concentration	231	0	0.03	1314	1	1		CD47.vs.Control	1
GO:0007205	protein kinase C-activating G protein-coupled receptor signaling pathway	18	0	0	1315	1	1		CD47.vs.Control	1
GO:0007212	dopamine receptor signaling pathway	30	0	0	1316	1	1		CD47.vs.Control	1
GO:0007213	G protein-coupled acetylcholine receptor signaling pathway	7	0	0	1317	1	1		CD47.vs.Control	1
GO:0007214	gamma-aminobutyric acid signaling pathway	12	0	0	1318	1	1		CD47.vs.Control	1
GO:0007215	glutamate receptor signaling pathway	57	0	0.01	1319	1	1		CD47.vs.Control	1
GO:0007216	G protein-coupled glutamate receptor signaling pathway	10	0	0	1320	1	1		CD47.vs.Control	1
GO:0007218	neuropeptide signaling pathway	32	0	0	1321	1	1		CD47.vs.Control	1
GO:0007219	Notch signaling pathway	146	0	0.02	1322	1	1		CD47.vs.Control	1
GO:0007220	Notch receptor processing	10	0	0	1323	1	1		CD47.vs.Control	1
GO:0007221	positive regulation of transcription of Notch receptor target	6	0	0	1324	1	1		CD47.vs.Control	1
GO:0007224	smoothened signaling pathway	121	0	0.02	1325	1	1		CD47.vs.Control	1
GO:0007229	integrin-mediated signaling pathway	79	0	0.01	1326	1	1		CD47.vs.Control	1
GO:0007249	I-kappaB kinase/NF-kappaB signaling	168	0	0.02	1327	1	1		CD47.vs.Control	1
GO:0007250	activation of NF-kappaB-inducing kinase activity	14	0	0	1328	1	1		CD47.vs.Control	1
GO:0007252	I-kappaB phosphorylation	17	0	0	1329	1	1		CD47.vs.Control	1
GO:0007253	cytoplasmic sequestering of NF-kappaB	5	0	0	1330	1	1		CD47.vs.Control	1
GO:0007254	JNK cascade	167	0	0.02	1331	1	1		CD47.vs.Control	1
GO:0007256	activation of JNKK activity	7	0	0	1332	1	1		CD47.vs.Control	1
GO:0007257	activation of JUN kinase activity	34	0	0	1333	1	1		CD47.vs.Control	1
GO:0007259	JAK-STAT cascade	117	0	0.02	1334	1	1		CD47.vs.Control	1
GO:0007260	tyrosine phosphorylation of STAT protein	66	0	0.01	1335	1	1		CD47.vs.Control	1
GO:0007263	nitric oxide mediated signal transduction	17	0	0	1336	1	1		CD47.vs.Control	1
GO:0007264	small GTPase mediated signal transduction	439	0	0.06	1337	1	1		CD47.vs.Control	1
GO:0007265	Ras protein signal transduction	377	0	0.05	1338	1	1		CD47.vs.Control	1
GO:0007266	Rho protein signal transduction	178	0	0.02	1339	1	1		CD47.vs.Control	1
GO:0007267	cell-cell signaling	1040	0	0.14	1340	1	1		CD47.vs.Control	1
GO:0007268	chemical synaptic transmission	474	0	0.07	1341	1	1		CD47.vs.Control	1
GO:0007269	neurotransmitter secretion	134	0	0.02	1342	1	1		CD47.vs.Control	1
GO:0007270	neuron-neuron synaptic transmission	8	0	0	1343	1	1		CD47.vs.Control	1
GO:0007271	synaptic transmission, cholinergic	16	0	0	1344	1	1		CD47.vs.Control	1
GO:0007272	ensheathment of neurons	107	0	0.01	1345	1	1		CD47.vs.Control	1
GO:0007274	neuromuscular synaptic transmission	17	0	0	1346	1	1		CD47.vs.Control	1
GO:0007276	gamete generation	491	0	0.07	1347	1	1		CD47.vs.Control	1
GO:0007281	germ cell development	212	0	0.03	1348	1	1		CD47.vs.Control	1
GO:0007283	spermatogenesis	366	0	0.05	1349	1	1		CD47.vs.Control	1
GO:0007286	spermatid development	124	0	0.02	1350	1	1		CD47.vs.Control	1
GO:0007288	sperm axoneme assembly	15	0	0	1351	1	1		CD47.vs.Control	1
GO:0007289	spermatid nucleus differentiation	16	0	0	1352	1	1		CD47.vs.Control	1
GO:0007292	female gamete generation	114	0	0.02	1353	1	1		CD47.vs.Control	1
GO:0007320	insemination	5	0	0	1354	1	1		CD47.vs.Control	1
GO:0007338	single fertilization	85	0	0.01	1355	1	1		CD47.vs.Control	1
GO:0007339	binding of sperm to zona pellucida	28	0	0	1356	1	1		CD47.vs.Control	1
GO:0007340	acrosome reaction	16	0	0	1357	1	1		CD47.vs.Control	1
GO:0007341	penetration of zona pellucida	5	0	0	1358	1	1		CD47.vs.Control	1
GO:0007342	fusion of sperm to egg plasma membrane involved in single fertilization	7	0	0	1359	1	1		CD47.vs.Control	1
GO:0007343	egg activation	5	0	0	1360	1	1		CD47.vs.Control	1
GO:0007346	regulation of mitotic cell cycle	445	0	0.06	1361	1	1		CD47.vs.Control	1
GO:0007350	blastoderm segmentation	13	0	0	1362	1	1		CD47.vs.Control	1
GO:0007351	tripartite regional subdivision	9	0	0	1363	1	1		CD47.vs.Control	1
GO:0007368	determination of left/right symmetry	92	0	0.01	1364	1	1		CD47.vs.Control	1
GO:0007369	gastrulation	133	0	0.02	1365	1	1		CD47.vs.Control	1
GO:0007379	segment specification	12	0	0	1366	1	1		CD47.vs.Control	1
GO:0007398	ectoderm development	13	0	0	1367	1	1		CD47.vs.Control	1
GO:0007399	nervous system development	1726	0	0.24	1368	1	1		CD47.vs.Control	1
GO:0007405	neuroblast proliferation	55	0	0.01	1369	1	1		CD47.vs.Control	1
GO:0007406	negative regulation of neuroblast proliferation	7	0	0	1370	1	1		CD47.vs.Control	1
GO:0007409	axonogenesis	340	0	0.05	1371	1	1		CD47.vs.Control	1
GO:0007411	axon guidance	155	0	0.02	1372	1	1		CD47.vs.Control	1
GO:0007413	axonal fasciculation	19	0	0	1373	1	1		CD47.vs.Control	1
GO:0007416	synapse assembly	118	0	0.02	1374	1	1		CD47.vs.Control	1
GO:0007417	central nervous system development	627	0	0.09	1375	1	1		CD47.vs.Control	1
GO:0007420	brain development	468	0	0.06	1376	1	1		CD47.vs.Control	1
GO:0007422	peripheral nervous system development	62	0	0.01	1377	1	1		CD47.vs.Control	1
GO:0007423	sensory organ development	423	0	0.06	1378	1	1		CD47.vs.Control	1
GO:0007431	salivary gland development	30	0	0	1379	1	1		CD47.vs.Control	1
GO:0007435	salivary gland morphogenesis	27	0	0	1380	1	1		CD47.vs.Control	1
GO:0007440	foregut morphogenesis	9	0	0	1381	1	1		CD47.vs.Control	1
GO:0007442	hindgut morphogenesis	6	0	0	1382	1	1		CD47.vs.Control	1
GO:0007492	endoderm development	47	0	0.01	1383	1	1		CD47.vs.Control	1
GO:0007498	mesoderm development	82	0	0.01	1384	1	1		CD47.vs.Control	1
GO:0007501	mesodermal cell fate specification	6	0	0	1385	1	1		CD47.vs.Control	1
GO:0007507	heart development	500	0	0.07	1386	1	1		CD47.vs.Control	1
GO:0007512	adult heart development	14	0	0	1387	1	1		CD47.vs.Control	1
GO:0007517	muscle organ development	318	0	0.04	1388	1	1		CD47.vs.Control	1
GO:0007519	skeletal muscle tissue development	143	0	0.02	1389	1	1		CD47.vs.Control	1
GO:0007520	myoblast fusion	35	0	0	1390	1	1		CD47.vs.Control	1
GO:0007528	neuromuscular junction development	43	0	0.01	1391	1	1		CD47.vs.Control	1
GO:0007530	sex determination	16	0	0	1392	1	1		CD47.vs.Control	1
GO:0007548	sex differentiation	199	0	0.03	1393	1	1		CD47.vs.Control	1
GO:0007549	dosage compensation	24	0	0	1394	1	1		CD47.vs.Control	1
GO:0007565	female pregnancy	91	0	0.01	1395	1	1		CD47.vs.Control	1
GO:0007566	embryo implantation	40	0	0.01	1396	1	1		CD47.vs.Control	1
GO:0007567	parturition	7	0	0	1397	1	1		CD47.vs.Control	1
GO:0007568	aging	163	0	0.02	1398	1	1		CD47.vs.Control	1
GO:0007569	cell aging	92	0	0.01	1399	1	1		CD47.vs.Control	1
GO:0007584	response to nutrient	82	0	0.01	1400	1	1		CD47.vs.Control	1
GO:0007585	respiratory gaseous exchange	41	0	0.01	1401	1	1		CD47.vs.Control	1
GO:0007586	digestion	66	0	0.01	1402	1	1		CD47.vs.Control	1
GO:0007588	excretion	24	0	0	1403	1	1		CD47.vs.Control	1
GO:0007589	body fluid secretion	67	0	0.01	1404	1	1		CD47.vs.Control	1
GO:0007595	lactation	31	0	0	1405	1	1		CD47.vs.Control	1
GO:0007596	blood coagulation	129	0	0.02	1406	1	1		CD47.vs.Control	1
GO:0007599	hemostasis	131	0	0.02	1407	1	1		CD47.vs.Control	1
GO:0007600	sensory perception	388	0	0.05	1408	1	1		CD47.vs.Control	1
GO:0007601	visual perception	94	0	0.01	1409	1	1		CD47.vs.Control	1
GO:0007602	phototransduction	19	0	0	1410	1	1		CD47.vs.Control	1
GO:0007603	phototransduction, visible light	6	0	0	1411	1	1		CD47.vs.Control	1
GO:0007605	sensory perception of sound	104	0	0.01	1412	1	1		CD47.vs.Control	1
GO:0007606	sensory perception of chemical stimulus	101	0	0.01	1413	1	1		CD47.vs.Control	1
GO:0007608	sensory perception of smell	80	0	0.01	1414	1	1		CD47.vs.Control	1
GO:0007610	behavior	482	0	0.07	1415	1	1		CD47.vs.Control	1
GO:0007611	learning or memory	200	0	0.03	1416	1	1		CD47.vs.Control	1
GO:0007612	learning	112	0	0.02	1417	1	1		CD47.vs.Control	1
GO:0007613	memory	96	0	0.01	1418	1	1		CD47.vs.Control	1
GO:0007614	short-term memory	9	0	0	1419	1	1		CD47.vs.Control	1
GO:0007616	long-term memory	26	0	0	1420	1	1		CD47.vs.Control	1
GO:0007617	mating behavior	19	0	0	1421	1	1		CD47.vs.Control	1
GO:0007618	mating	30	0	0	1422	1	1		CD47.vs.Control	1
GO:0007620	copulation	13	0	0	1423	1	1		CD47.vs.Control	1
GO:0007622	rhythmic behavior	33	0	0	1424	1	1		CD47.vs.Control	1
GO:0007623	circadian rhythm	153	0	0.02	1425	1	1		CD47.vs.Control	1
GO:0007625	grooming behavior	9	0	0	1426	1	1		CD47.vs.Control	1
GO:0007626	locomotory behavior	168	0	0.02	1427	1	1		CD47.vs.Control	1
GO:0007628	adult walking behavior	31	0	0	1428	1	1		CD47.vs.Control	1
GO:0007631	feeding behavior	65	0	0.01	1429	1	1		CD47.vs.Control	1
GO:0007632	visual behavior	50	0	0.01	1430	1	1		CD47.vs.Control	1
GO:0007635	chemosensory behavior	12	0	0	1431	1	1		CD47.vs.Control	1
GO:0007638	mechanosensory behavior	12	0	0	1432	1	1		CD47.vs.Control	1
GO:0008015	blood circulation	330	0	0.05	1433	1	1		CD47.vs.Control	1
GO:0008016	regulation of heart contraction	122	0	0.02	1434	1	1		CD47.vs.Control	1
GO:0008033	tRNA processing	109	0	0.02	1435	1	1		CD47.vs.Control	1
GO:0008037	cell recognition	114	0	0.02	1436	1	1		CD47.vs.Control	1
GO:0008038	neuron recognition	37	0	0.01	1437	1	1		CD47.vs.Control	1
GO:0008045	motor neuron axon guidance	22	0	0	1438	1	1		CD47.vs.Control	1
GO:0008053	mitochondrial fusion	18	0	0	1439	1	1		CD47.vs.Control	1
GO:0008063	Toll signaling pathway	7	0	0	1440	1	1		CD47.vs.Control	1
GO:0008064	regulation of actin polymerization or depolymerization	158	0	0.02	1441	1	1		CD47.vs.Control	1
GO:0008088	axo-dendritic transport	67	0	0.01	1442	1	1		CD47.vs.Control	1
GO:0008089	anterograde axonal transport	42	0	0.01	1443	1	1		CD47.vs.Control	1
GO:0008090	retrograde axonal transport	17	0	0	1444	1	1		CD47.vs.Control	1
GO:0008104	protein localization	2231	0	0.31	1445	1	1		CD47.vs.Control	1
GO:0008154	actin polymerization or depolymerization	179	0	0.02	1446	1	1		CD47.vs.Control	1
GO:0008156	negative regulation of DNA replication	31	0	0	1447	1	1		CD47.vs.Control	1
GO:0008202	steroid metabolic process	203	0	0.03	1448	1	1		CD47.vs.Control	1
GO:0008203	cholesterol metabolic process	96	0	0.01	1449	1	1		CD47.vs.Control	1
GO:0008206	bile acid metabolic process	16	0	0	1450	1	1		CD47.vs.Control	1
GO:0008207	C21-steroid hormone metabolic process	20	0	0	1451	1	1		CD47.vs.Control	1
GO:0008209	androgen metabolic process	15	0	0	1452	1	1		CD47.vs.Control	1
GO:0008210	estrogen metabolic process	12	0	0	1453	1	1		CD47.vs.Control	1
GO:0008211	glucocorticoid metabolic process	16	0	0	1454	1	1		CD47.vs.Control	1
GO:0008212	mineralocorticoid metabolic process	6	0	0	1455	1	1		CD47.vs.Control	1
GO:0008213	protein alkylation	159	0	0.02	1456	1	1		CD47.vs.Control	1
GO:0008214	protein dealkylation	28	0	0	1457	1	1		CD47.vs.Control	1
GO:0008215	spermine metabolic process	7	0	0	1458	1	1		CD47.vs.Control	1
GO:0008216	spermidine metabolic process	7	0	0	1459	1	1		CD47.vs.Control	1
GO:0008217	regulation of blood pressure	118	0	0.02	1460	1	1		CD47.vs.Control	1
GO:0008219	cell death	1758	0	0.24	1461	1	1		CD47.vs.Control	1
GO:0008272	sulfate transport	10	0	0	1462	1	1		CD47.vs.Control	1
GO:0008277	regulation of G protein-coupled receptor signaling pathway	103	0	0.01	1463	1	1		CD47.vs.Control	1
GO:0008283	cell proliferation	1634	0	0.23	1464	1	1		CD47.vs.Control	1
GO:0008284	positive regulation of cell proliferation	788	0	0.11	1465	1	1		CD47.vs.Control	1
GO:0008285	negative regulation of cell proliferation	570	0	0.08	1466	1	1		CD47.vs.Control	1
GO:0008286	insulin receptor signaling pathway	96	0	0.01	1467	1	1		CD47.vs.Control	1
GO:0008298	intracellular mRNA localization	11	0	0	1468	1	1		CD47.vs.Control	1
GO:0008299	isoprenoid biosynthetic process	25	0	0	1469	1	1		CD47.vs.Control	1
GO:0008300	isoprenoid catabolic process	8	0	0	1470	1	1		CD47.vs.Control	1
GO:0008306	associative learning	66	0	0.01	1471	1	1		CD47.vs.Control	1
GO:0008333	endosome to lysosome transport	45	0	0.01	1472	1	1		CD47.vs.Control	1
GO:0008334	histone mRNA metabolic process	14	0	0	1473	1	1		CD47.vs.Control	1
GO:0008340	determination of adult lifespan	23	0	0	1474	1	1		CD47.vs.Control	1
GO:0008344	adult locomotory behavior	80	0	0.01	1475	1	1		CD47.vs.Control	1
GO:0008347	glial cell migration	47	0	0.01	1476	1	1		CD47.vs.Control	1
GO:0008354	germ cell migration	8	0	0	1477	1	1		CD47.vs.Control	1
GO:0008356	asymmetric cell division	18	0	0	1478	1	1		CD47.vs.Control	1
GO:0008360	regulation of cell shape	138	0	0.02	1479	1	1		CD47.vs.Control	1
GO:0008361	regulation of cell size	176	0	0.02	1480	1	1		CD47.vs.Control	1
GO:0008366	axon ensheathment	107	0	0.01	1481	1	1		CD47.vs.Control	1
GO:0008380	RNA splicing	332	0	0.05	1482	1	1		CD47.vs.Control	1
GO:0008406	gonad development	160	0	0.02	1483	1	1		CD47.vs.Control	1
GO:0008535	respiratory chain complex IV assembly	18	0	0	1484	1	1		CD47.vs.Control	1
GO:0008542	visual learning	48	0	0.01	1485	1	1		CD47.vs.Control	1
GO:0008543	fibroblast growth factor receptor signaling pathway	48	0	0.01	1486	1	1		CD47.vs.Control	1
GO:0008544	epidermis development	211	0	0.03	1487	1	1		CD47.vs.Control	1
GO:0008584	male gonad development	91	0	0.01	1488	1	1		CD47.vs.Control	1
GO:0008585	female gonad development	85	0	0.01	1489	1	1		CD47.vs.Control	1
GO:0008589	regulation of smoothened signaling pathway	70	0	0.01	1490	1	1		CD47.vs.Control	1
GO:0008593	regulation of Notch signaling pathway	70	0	0.01	1491	1	1		CD47.vs.Control	1
GO:0008594	photoreceptor cell morphogenesis	5	0	0	1492	1	1		CD47.vs.Control	1
GO:0008595	anterior/posterior axis specification, embryo	9	0	0	1493	1	1		CD47.vs.Control	1
GO:0008608	attachment of spindle microtubules to kinetochore	30	0	0	1494	1	1		CD47.vs.Control	1
GO:0008610	lipid biosynthetic process	432	0	0.06	1495	1	1		CD47.vs.Control	1
GO:0008611	ether lipid biosynthetic process	5	0	0	1496	1	1		CD47.vs.Control	1
GO:0008625	extrinsic apoptotic signaling pathway via death domain receptors	64	0	0.01	1497	1	1		CD47.vs.Control	1
GO:0008626	granzyme-mediated apoptotic signaling pathway	10	0	0	1498	1	1		CD47.vs.Control	1
GO:0008627	intrinsic apoptotic signaling pathway in response to osmotic stress	6	0	0	1499	1	1		CD47.vs.Control	1
GO:0008630	intrinsic apoptotic signaling pathway in response to DNA damage	106	0	0.01	1500	1	1		CD47.vs.Control	1
GO:0008631	intrinsic apoptotic signaling pathway in response to oxidative stress	40	0	0.01	1501	1	1		CD47.vs.Control	1
GO:0008635	activation of cysteine-type endopeptidase activity involved in apoptotic process by cytochrome c	6	0	0	1502	1	1		CD47.vs.Control	1
GO:0008637	apoptotic mitochondrial changes	102	0	0.01	1503	1	1		CD47.vs.Control	1
GO:0008643	carbohydrate transport	108	0	0.01	1504	1	1		CD47.vs.Control	1
GO:0008645	hexose transmembrane transport	78	0	0.01	1505	1	1		CD47.vs.Control	1
GO:0008652	cellular amino acid biosynthetic process	51	0	0.01	1506	1	1		CD47.vs.Control	1
GO:0008654	phospholipid biosynthetic process	146	0	0.02	1507	1	1		CD47.vs.Control	1
GO:0009048	dosage compensation by inactivation of X chromosome	22	0	0	1508	1	1		CD47.vs.Control	1
GO:0009052	pentose-phosphate shunt, non-oxidative branch	5	0	0	1509	1	1		CD47.vs.Control	1
GO:0009056	catabolic process	1827	0	0.25	1510	1	1		CD47.vs.Control	1
GO:0009057	macromolecule catabolic process	1044	0	0.14	1511	1	1		CD47.vs.Control	1
GO:0009058	biosynthetic process	4213	0	0.58	1512	1	1		CD47.vs.Control	1
GO:0009059	macromolecule biosynthetic process	3423	0	0.47	1513	1	1		CD47.vs.Control	1
GO:0009060	aerobic respiration	62	0	0.01	1514	1	1		CD47.vs.Control	1
GO:0009062	fatty acid catabolic process	79	0	0.01	1515	1	1		CD47.vs.Control	1
GO:0009063	cellular amino acid catabolic process	71	0	0.01	1516	1	1		CD47.vs.Control	1
GO:0009064	glutamine family amino acid metabolic process	57	0	0.01	1517	1	1		CD47.vs.Control	1
GO:0009065	glutamine family amino acid catabolic process	22	0	0	1518	1	1		CD47.vs.Control	1
GO:0009066	aspartate family amino acid metabolic process	32	0	0	1519	1	1		CD47.vs.Control	1
GO:0009067	aspartate family amino acid biosynthetic process	18	0	0	1520	1	1		CD47.vs.Control	1
GO:0009068	aspartate family amino acid catabolic process	6	0	0	1521	1	1		CD47.vs.Control	1
GO:0009069	serine family amino acid metabolic process	31	0	0	1522	1	1		CD47.vs.Control	1
GO:0009070	serine family amino acid biosynthetic process	14	0	0	1523	1	1		CD47.vs.Control	1
GO:0009071	serine family amino acid catabolic process	11	0	0	1524	1	1		CD47.vs.Control	1
GO:0009072	aromatic amino acid family metabolic process	24	0	0	1525	1	1		CD47.vs.Control	1
GO:0009074	aromatic amino acid family catabolic process	13	0	0	1526	1	1		CD47.vs.Control	1
GO:0009081	branched-chain amino acid metabolic process	19	0	0	1527	1	1		CD47.vs.Control	1
GO:0009083	branched-chain amino acid catabolic process	15	0	0	1528	1	1		CD47.vs.Control	1
GO:0009084	glutamine family amino acid biosynthetic process	13	0	0	1529	1	1		CD47.vs.Control	1
GO:0009086	methionine biosynthetic process	11	0	0	1530	1	1		CD47.vs.Control	1
GO:0009100	glycoprotein metabolic process	254	0	0.04	1531	1	1		CD47.vs.Control	1
GO:0009101	glycoprotein biosynthetic process	208	0	0.03	1532	1	1		CD47.vs.Control	1
GO:0009108	coenzyme biosynthetic process	159	0	0.02	1533	1	1		CD47.vs.Control	1
GO:0009109	coenzyme catabolic process	15	0	0	1534	1	1		CD47.vs.Control	1
GO:0009110	vitamin biosynthetic process	18	0	0	1535	1	1		CD47.vs.Control	1
GO:0009111	vitamin catabolic process	8	0	0	1536	1	1		CD47.vs.Control	1
GO:0009112	nucleobase metabolic process	30	0	0	1537	1	1		CD47.vs.Control	1
GO:0009113	purine nucleobase biosynthetic process	8	0	0	1538	1	1		CD47.vs.Control	1
GO:0009116	nucleoside metabolic process	79	0	0.01	1539	1	1		CD47.vs.Control	1
GO:0009117	nucleotide metabolic process	455	0	0.06	1540	1	1		CD47.vs.Control	1
GO:0009119	ribonucleoside metabolic process	63	0	0.01	1541	1	1		CD47.vs.Control	1
GO:0009120	deoxyribonucleoside metabolic process	8	0	0	1542	1	1		CD47.vs.Control	1
GO:0009123	nucleoside monophosphate metabolic process	231	0	0.03	1543	1	1		CD47.vs.Control	1
GO:0009124	nucleoside monophosphate biosynthetic process	131	0	0.02	1544	1	1		CD47.vs.Control	1
GO:0009125	nucleoside monophosphate catabolic process	10	0	0	1545	1	1		CD47.vs.Control	1
GO:0009126	purine nucleoside monophosphate metabolic process	218	0	0.03	1546	1	1		CD47.vs.Control	1
GO:0009127	purine nucleoside monophosphate biosynthetic process	121	0	0.02	1547	1	1		CD47.vs.Control	1
GO:0009128	purine nucleoside monophosphate catabolic process	8	0	0	1548	1	1		CD47.vs.Control	1
GO:0009129	pyrimidine nucleoside monophosphate metabolic process	10	0	0	1549	1	1		CD47.vs.Control	1
GO:0009130	pyrimidine nucleoside monophosphate biosynthetic process	9	0	0	1550	1	1		CD47.vs.Control	1
GO:0009132	nucleoside diphosphate metabolic process	95	0	0.01	1551	1	1		CD47.vs.Control	1
GO:0009133	nucleoside diphosphate biosynthetic process	7	0	0	1552	1	1		CD47.vs.Control	1
GO:0009134	nucleoside diphosphate catabolic process	9	0	0	1553	1	1		CD47.vs.Control	1
GO:0009135	purine nucleoside diphosphate metabolic process	77	0	0.01	1554	1	1		CD47.vs.Control	1
GO:0009137	purine nucleoside diphosphate catabolic process	5	0	0	1555	1	1		CD47.vs.Control	1
GO:0009141	nucleoside triphosphate metabolic process	241	0	0.03	1556	1	1		CD47.vs.Control	1
GO:0009142	nucleoside triphosphate biosynthetic process	123	0	0.02	1557	1	1		CD47.vs.Control	1
GO:0009143	nucleoside triphosphate catabolic process	12	0	0	1558	1	1		CD47.vs.Control	1
GO:0009144	purine nucleoside triphosphate metabolic process	225	0	0.03	1559	1	1		CD47.vs.Control	1
GO:0009145	purine nucleoside triphosphate biosynthetic process	110	0	0.02	1560	1	1		CD47.vs.Control	1
GO:0009146	purine nucleoside triphosphate catabolic process	6	0	0	1561	1	1		CD47.vs.Control	1
GO:0009147	pyrimidine nucleoside triphosphate metabolic process	15	0	0	1562	1	1		CD47.vs.Control	1
GO:0009148	pyrimidine nucleoside triphosphate biosynthetic process	12	0	0	1563	1	1		CD47.vs.Control	1
GO:0009150	purine ribonucleotide metabolic process	332	0	0.05	1564	1	1		CD47.vs.Control	1
GO:0009151	purine deoxyribonucleotide metabolic process	14	0	0	1565	1	1		CD47.vs.Control	1
GO:0009152	purine ribonucleotide biosynthetic process	173	0	0.02	1566	1	1		CD47.vs.Control	1
GO:0009154	purine ribonucleotide catabolic process	20	0	0	1567	1	1		CD47.vs.Control	1
GO:0009155	purine deoxyribonucleotide catabolic process	6	0	0	1568	1	1		CD47.vs.Control	1
GO:0009156	ribonucleoside monophosphate biosynthetic process	125	0	0.02	1569	1	1		CD47.vs.Control	1
GO:0009157	deoxyribonucleoside monophosphate biosynthetic process	6	0	0	1570	1	1		CD47.vs.Control	1
GO:0009158	ribonucleoside monophosphate catabolic process	8	0	0	1571	1	1		CD47.vs.Control	1
GO:0009161	ribonucleoside monophosphate metabolic process	222	0	0.03	1572	1	1		CD47.vs.Control	1
GO:0009162	deoxyribonucleoside monophosphate metabolic process	9	0	0	1573	1	1		CD47.vs.Control	1
GO:0009163	nucleoside biosynthetic process	26	0	0	1574	1	1		CD47.vs.Control	1
GO:0009164	nucleoside catabolic process	15	0	0	1575	1	1		CD47.vs.Control	1
GO:0009165	nucleotide biosynthetic process	232	0	0.03	1576	1	1		CD47.vs.Control	1
GO:0009166	nucleotide catabolic process	105	0	0.01	1577	1	1		CD47.vs.Control	1
GO:0009167	purine ribonucleoside monophosphate metabolic process	218	0	0.03	1578	1	1		CD47.vs.Control	1
GO:0009168	purine ribonucleoside monophosphate biosynthetic process	121	0	0.02	1579	1	1		CD47.vs.Control	1
GO:0009169	purine ribonucleoside monophosphate catabolic process	8	0	0	1580	1	1		CD47.vs.Control	1
GO:0009176	pyrimidine deoxyribonucleoside monophosphate metabolic process	7	0	0	1581	1	1		CD47.vs.Control	1
GO:0009177	pyrimidine deoxyribonucleoside monophosphate biosynthetic process	6	0	0	1582	1	1		CD47.vs.Control	1
GO:0009179	purine ribonucleoside diphosphate metabolic process	77	0	0.01	1583	1	1		CD47.vs.Control	1
GO:0009181	purine ribonucleoside diphosphate catabolic process	5	0	0	1584	1	1		CD47.vs.Control	1
GO:0009185	ribonucleoside diphosphate metabolic process	81	0	0.01	1585	1	1		CD47.vs.Control	1
GO:0009186	deoxyribonucleoside diphosphate metabolic process	6	0	0	1586	1	1		CD47.vs.Control	1
GO:0009187	cyclic nucleotide metabolic process	21	0	0	1587	1	1		CD47.vs.Control	1
GO:0009188	ribonucleoside diphosphate biosynthetic process	5	0	0	1588	1	1		CD47.vs.Control	1
GO:0009190	cyclic nucleotide biosynthetic process	13	0	0	1589	1	1		CD47.vs.Control	1
GO:0009191	ribonucleoside diphosphate catabolic process	8	0	0	1590	1	1		CD47.vs.Control	1
GO:0009199	ribonucleoside triphosphate metabolic process	221	0	0.03	1591	1	1		CD47.vs.Control	1
GO:0009200	deoxyribonucleoside triphosphate metabolic process	19	0	0	1592	1	1		CD47.vs.Control	1
GO:0009201	ribonucleoside triphosphate biosynthetic process	112	0	0.02	1593	1	1		CD47.vs.Control	1
GO:0009202	deoxyribonucleoside triphosphate biosynthetic process	5	0	0	1594	1	1		CD47.vs.Control	1
GO:0009204	deoxyribonucleoside triphosphate catabolic process	7	0	0	1595	1	1		CD47.vs.Control	1
GO:0009205	purine ribonucleoside triphosphate metabolic process	217	0	0.03	1596	1	1		CD47.vs.Control	1
GO:0009206	purine ribonucleoside triphosphate biosynthetic process	109	0	0.02	1597	1	1		CD47.vs.Control	1
GO:0009208	pyrimidine ribonucleoside triphosphate metabolic process	10	0	0	1598	1	1		CD47.vs.Control	1
GO:0009209	pyrimidine ribonucleoside triphosphate biosynthetic process	9	0	0	1599	1	1		CD47.vs.Control	1
GO:0009211	pyrimidine deoxyribonucleoside triphosphate metabolic process	5	0	0	1600	1	1		CD47.vs.Control	1
GO:0009215	purine deoxyribonucleoside triphosphate metabolic process	13	0	0	1601	1	1		CD47.vs.Control	1
GO:0009217	purine deoxyribonucleoside triphosphate catabolic process	5	0	0	1602	1	1		CD47.vs.Control	1
GO:0009218	pyrimidine ribonucleotide metabolic process	15	0	0	1603	1	1		CD47.vs.Control	1
GO:0009219	pyrimidine deoxyribonucleotide metabolic process	13	0	0	1604	1	1		CD47.vs.Control	1
GO:0009220	pyrimidine ribonucleotide biosynthetic process	14	0	0	1605	1	1		CD47.vs.Control	1
GO:0009221	pyrimidine deoxyribonucleotide biosynthetic process	10	0	0	1606	1	1		CD47.vs.Control	1
GO:0009225	nucleotide-sugar metabolic process	29	0	0	1607	1	1		CD47.vs.Control	1
GO:0009226	nucleotide-sugar biosynthetic process	13	0	0	1608	1	1		CD47.vs.Control	1
GO:0009235	cobalamin metabolic process	7	0	0	1609	1	1		CD47.vs.Control	1
GO:0009240	isopentenyl diphosphate biosynthetic process	5	0	0	1610	1	1		CD47.vs.Control	1
GO:0009247	glycolipid biosynthetic process	51	0	0.01	1611	1	1		CD47.vs.Control	1
GO:0009249	protein lipoylation	6	0	0	1612	1	1		CD47.vs.Control	1
GO:0009250	glucan biosynthetic process	34	0	0	1613	1	1		CD47.vs.Control	1
GO:0009251	glucan catabolic process	16	0	0	1614	1	1		CD47.vs.Control	1
GO:0009256	10-formyltetrahydrofolate metabolic process	5	0	0	1615	1	1		CD47.vs.Control	1
GO:0009259	ribonucleotide metabolic process	342	0	0.05	1616	1	1		CD47.vs.Control	1
GO:0009260	ribonucleotide biosynthetic process	182	0	0.03	1617	1	1		CD47.vs.Control	1
GO:0009261	ribonucleotide catabolic process	20	0	0	1618	1	1		CD47.vs.Control	1
GO:0009262	deoxyribonucleotide metabolic process	32	0	0	1619	1	1		CD47.vs.Control	1
GO:0009263	deoxyribonucleotide biosynthetic process	15	0	0	1620	1	1		CD47.vs.Control	1
GO:0009264	deoxyribonucleotide catabolic process	11	0	0	1621	1	1		CD47.vs.Control	1
GO:0009265	2'-deoxyribonucleotide biosynthetic process	12	0	0	1622	1	1		CD47.vs.Control	1
GO:0009266	response to temperature stimulus	132	0	0.02	1623	1	1		CD47.vs.Control	1
GO:0009267	cellular response to starvation	125	0	0.02	1624	1	1		CD47.vs.Control	1
GO:0009268	response to pH	26	0	0	1625	1	1		CD47.vs.Control	1
GO:0009299	mRNA transcription	24	0	0	1626	1	1		CD47.vs.Control	1
GO:0009301	snRNA transcription	9	0	0	1627	1	1		CD47.vs.Control	1
GO:0009303	rRNA transcription	29	0	0	1628	1	1		CD47.vs.Control	1
GO:0009306	protein secretion	471	0	0.07	1629	1	1		CD47.vs.Control	1
GO:0009308	amine metabolic process	58	0	0.01	1630	1	1		CD47.vs.Control	1
GO:0009309	amine biosynthetic process	12	0	0	1631	1	1		CD47.vs.Control	1
GO:0009310	amine catabolic process	12	0	0	1632	1	1		CD47.vs.Control	1
GO:0009311	oligosaccharide metabolic process	28	0	0	1633	1	1		CD47.vs.Control	1
GO:0009312	oligosaccharide biosynthetic process	14	0	0	1634	1	1		CD47.vs.Control	1
GO:0009313	oligosaccharide catabolic process	7	0	0	1635	1	1		CD47.vs.Control	1
GO:0009314	response to radiation	347	0	0.05	1636	1	1		CD47.vs.Control	1
GO:0009394	2'-deoxyribonucleotide metabolic process	27	0	0	1637	1	1		CD47.vs.Control	1
GO:0009395	phospholipid catabolic process	33	0	0	1638	1	1		CD47.vs.Control	1
GO:0009396	folic acid-containing compound biosynthetic process	9	0	0	1639	1	1		CD47.vs.Control	1
GO:0009404	toxin metabolic process	16	0	0	1640	1	1		CD47.vs.Control	1
GO:0009407	toxin catabolic process	5	0	0	1641	1	1		CD47.vs.Control	1
GO:0009408	response to heat	90	0	0.01	1642	1	1		CD47.vs.Control	1
GO:0009409	response to cold	29	0	0	1643	1	1		CD47.vs.Control	1
GO:0009410	response to xenobiotic stimulus	134	0	0.02	1644	1	1		CD47.vs.Control	1
GO:0009411	response to UV	132	0	0.02	1645	1	1		CD47.vs.Control	1
GO:0009415	response to water	6	0	0	1646	1	1		CD47.vs.Control	1
GO:0009416	response to light stimulus	242	0	0.03	1647	1	1		CD47.vs.Control	1
GO:0009435	NAD biosynthetic process	14	0	0	1648	1	1		CD47.vs.Control	1
GO:0009437	carnitine metabolic process	11	0	0	1649	1	1		CD47.vs.Control	1
GO:0009438	methylglyoxal metabolic process	7	0	0	1650	1	1		CD47.vs.Control	1
GO:0009445	putrescine metabolic process	5	0	0	1651	1	1		CD47.vs.Control	1
GO:0009451	RNA modification	123	0	0.02	1652	1	1		CD47.vs.Control	1
GO:0009452	7-methylguanosine RNA capping	7	0	0	1653	1	1		CD47.vs.Control	1
GO:0009566	fertilization	117	0	0.02	1654	1	1		CD47.vs.Control	1
GO:0009581	detection of external stimulus	80	0	0.01	1655	1	1		CD47.vs.Control	1
GO:0009582	detection of abiotic stimulus	79	0	0.01	1656	1	1		CD47.vs.Control	1
GO:0009583	detection of light stimulus	32	0	0	1657	1	1		CD47.vs.Control	1
GO:0009584	detection of visible light	19	0	0	1658	1	1		CD47.vs.Control	1
GO:0009593	detection of chemical stimulus	30	0	0	1659	1	1		CD47.vs.Control	1
GO:0009595	detection of biotic stimulus	23	0	0	1660	1	1		CD47.vs.Control	1
GO:0009611	response to wounding	375	0	0.05	1661	1	1		CD47.vs.Control	1
GO:0009612	response to mechanical stimulus	113	0	0.02	1662	1	1		CD47.vs.Control	1
GO:0009617	response to bacterium	487	0	0.07	1663	1	1		CD47.vs.Control	1
GO:0009620	response to fungus	32	0	0	1664	1	1		CD47.vs.Control	1
GO:0009628	response to abiotic stimulus	779	0	0.11	1665	1	1		CD47.vs.Control	1
GO:0009635	response to herbicide	6	0	0	1666	1	1		CD47.vs.Control	1
GO:0009636	response to toxic substance	252	0	0.03	1667	1	1		CD47.vs.Control	1
GO:0009642	response to light intensity	6	0	0	1668	1	1		CD47.vs.Control	1
GO:0009648	photoperiodism	22	0	0	1669	1	1		CD47.vs.Control	1
GO:0009649	entrainment of circadian clock	22	0	0	1670	1	1		CD47.vs.Control	1
GO:0009650	UV protection	9	0	0	1671	1	1		CD47.vs.Control	1
GO:0009651	response to salt stress	16	0	0	1672	1	1		CD47.vs.Control	1
GO:0009712	catechol-containing compound metabolic process	36	0	0	1673	1	1		CD47.vs.Control	1
GO:0009713	catechol-containing compound biosynthetic process	16	0	0	1674	1	1		CD47.vs.Control	1
GO:0009719	response to endogenous stimulus	998	0	0.14	1675	1	1		CD47.vs.Control	1
GO:0009725	response to hormone	520	0	0.07	1676	1	1		CD47.vs.Control	1
GO:0009743	response to carbohydrate	143	0	0.02	1677	1	1		CD47.vs.Control	1
GO:0009746	response to hexose	132	0	0.02	1678	1	1		CD47.vs.Control	1
GO:0009749	response to glucose	131	0	0.02	1679	1	1		CD47.vs.Control	1
GO:0009755	hormone-mediated signaling pathway	131	0	0.02	1680	1	1		CD47.vs.Control	1
GO:0009756	carbohydrate mediated signaling	5	0	0	1681	1	1		CD47.vs.Control	1
GO:0009757	hexose mediated signaling	5	0	0	1682	1	1		CD47.vs.Control	1
GO:0009791	post-embryonic development	102	0	0.01	1683	1	1		CD47.vs.Control	1
GO:0009794	regulation of mitotic cell cycle, embryonic	5	0	0	1684	1	1		CD47.vs.Control	1
GO:0009798	axis specification	67	0	0.01	1685	1	1		CD47.vs.Control	1
GO:0009799	specification of symmetry	98	0	0.01	1686	1	1		CD47.vs.Control	1
GO:0009812	flavonoid metabolic process	8	0	0	1687	1	1		CD47.vs.Control	1
GO:0009855	determination of bilateral symmetry	98	0	0.01	1688	1	1		CD47.vs.Control	1
GO:0009880	embryonic pattern specification	44	0	0.01	1689	1	1		CD47.vs.Control	1
GO:0009886	post-embryonic animal morphogenesis	12	0	0	1690	1	1		CD47.vs.Control	1
GO:0009887	animal organ morphogenesis	789	0	0.11	1691	1	1		CD47.vs.Control	1
GO:0009889	regulation of biosynthetic process	2909	0	0.4	1692	1	1		CD47.vs.Control	1
GO:0009890	negative regulation of biosynthetic process	1278	0	0.18	1693	1	1		CD47.vs.Control	1
GO:0009891	positive regulation of biosynthetic process	1594	0	0.22	1694	1	1		CD47.vs.Control	1
GO:0009892	negative regulation of metabolic process	2291	0	0.32	1695	1	1		CD47.vs.Control	1
GO:0009893	positive regulation of metabolic process	2866	0	0.4	1696	1	1		CD47.vs.Control	1
GO:0009894	regulation of catabolic process	716	0	0.1	1697	1	1		CD47.vs.Control	1
GO:0009895	negative regulation of catabolic process	248	0	0.03	1698	1	1		CD47.vs.Control	1
GO:0009896	positive regulation of catabolic process	372	0	0.05	1699	1	1		CD47.vs.Control	1
GO:0009912	auditory receptor cell fate commitment	6	0	0	1700	1	1		CD47.vs.Control	1
GO:0009913	epidermal cell differentiation	123	0	0.02	1701	1	1		CD47.vs.Control	1
GO:0009914	hormone transport	257	0	0.04	1702	1	1		CD47.vs.Control	1
GO:0009948	anterior/posterior axis specification	36	0	0	1703	1	1		CD47.vs.Control	1
GO:0009950	dorsal/ventral axis specification	12	0	0	1704	1	1		CD47.vs.Control	1
GO:0009953	dorsal/ventral pattern formation	64	0	0.01	1705	1	1		CD47.vs.Control	1
GO:0009954	proximal/distal pattern formation	26	0	0	1706	1	1		CD47.vs.Control	1
GO:0009966	regulation of signal transduction	2239	0	0.31	1707	1	1		CD47.vs.Control	1
GO:0009967	positive regulation of signal transduction	1216	0	0.17	1708	1	1		CD47.vs.Control	1
GO:0009968	negative regulation of signal transduction	1012	0	0.14	1709	1	1		CD47.vs.Control	1
GO:0009988	cell-cell recognition	44	0	0.01	1710	1	1		CD47.vs.Control	1
GO:0009991	response to extracellular stimulus	292	0	0.04	1711	1	1		CD47.vs.Control	1
GO:0009994	oocyte differentiation	40	0	0.01	1712	1	1		CD47.vs.Control	1
GO:0010001	glial cell differentiation	170	0	0.02	1713	1	1		CD47.vs.Control	1
GO:0010002	cardioblast differentiation	12	0	0	1714	1	1		CD47.vs.Control	1
GO:0010032	meiotic chromosome condensation	6	0	0	1715	1	1		CD47.vs.Control	1
GO:0010035	response to inorganic substance	354	0	0.05	1716	1	1		CD47.vs.Control	1
GO:0010038	response to metal ion	206	0	0.03	1717	1	1		CD47.vs.Control	1
GO:0010039	response to iron ion	18	0	0	1718	1	1		CD47.vs.Control	1
GO:0010040	response to iron(II) ion	5	0	0	1719	1	1		CD47.vs.Control	1
GO:0010042	response to manganese ion	8	0	0	1720	1	1		CD47.vs.Control	1
GO:0010043	response to zinc ion	21	0	0	1721	1	1		CD47.vs.Control	1
GO:0010046	response to mycotoxin	5	0	0	1722	1	1		CD47.vs.Control	1
GO:0010092	specification of animal organ identity	25	0	0	1723	1	1		CD47.vs.Control	1
GO:0010107	potassium ion import	29	0	0	1724	1	1		CD47.vs.Control	1
GO:0010155	regulation of proton transport	17	0	0	1725	1	1		CD47.vs.Control	1
GO:0010165	response to X-ray	26	0	0	1726	1	1		CD47.vs.Control	1
GO:0010171	body morphogenesis	53	0	0.01	1727	1	1		CD47.vs.Control	1
GO:0010172	embryonic body morphogenesis	14	0	0	1728	1	1		CD47.vs.Control	1
GO:0010182	sugar mediated signaling pathway	5	0	0	1729	1	1		CD47.vs.Control	1
GO:0010212	response to ionizing radiation	123	0	0.02	1730	1	1		CD47.vs.Control	1
GO:0010216	maintenance of DNA methylation	8	0	0	1731	1	1		CD47.vs.Control	1
GO:0010224	response to UV-B	16	0	0	1732	1	1		CD47.vs.Control	1
GO:0010225	response to UV-C	14	0	0	1733	1	1		CD47.vs.Control	1
GO:0010226	response to lithium ion	12	0	0	1734	1	1		CD47.vs.Control	1
GO:0010243	response to organonitrogen compound	622	0	0.09	1735	1	1		CD47.vs.Control	1
GO:0010255	glucose mediated signaling pathway	5	0	0	1736	1	1		CD47.vs.Control	1
GO:0010256	endomembrane system organization	328	0	0.05	1737	1	1		CD47.vs.Control	1
GO:0010257	NADH dehydrogenase complex assembly	42	0	0.01	1738	1	1		CD47.vs.Control	1
GO:0010259	multicellular organism aging	34	0	0	1739	1	1		CD47.vs.Control	1
GO:0010269	response to selenium ion	5	0	0	1740	1	1		CD47.vs.Control	1
GO:0010273	detoxification of copper ion	5	0	0	1741	1	1		CD47.vs.Control	1
GO:0010288	response to lead ion	10	0	0	1742	1	1		CD47.vs.Control	1
GO:0010310	regulation of hydrogen peroxide metabolic process	12	0	0	1743	1	1		CD47.vs.Control	1
GO:0010324	membrane invagination	78	0	0.01	1744	1	1		CD47.vs.Control	1
GO:0010332	response to gamma radiation	48	0	0.01	1745	1	1		CD47.vs.Control	1
GO:0010359	regulation of anion channel activity	9	0	0	1746	1	1		CD47.vs.Control	1
GO:0010389	regulation of G2/M transition of mitotic cell cycle	77	0	0.01	1747	1	1		CD47.vs.Control	1
GO:0010390	histone monoubiquitination	29	0	0	1748	1	1		CD47.vs.Control	1
GO:0010421	hydrogen peroxide-mediated programmed cell death	14	0	0	1749	1	1		CD47.vs.Control	1
GO:0010447	response to acidic pH	12	0	0	1750	1	1		CD47.vs.Control	1
GO:0010452	histone H3-K36 methylation	10	0	0	1751	1	1		CD47.vs.Control	1
GO:0010453	regulation of cell fate commitment	20	0	0	1752	1	1		CD47.vs.Control	1
GO:0010454	negative regulation of cell fate commitment	7	0	0	1753	1	1		CD47.vs.Control	1
GO:0010457	centriole-centriole cohesion	14	0	0	1754	1	1		CD47.vs.Control	1
GO:0010458	exit from mitosis	24	0	0	1755	1	1		CD47.vs.Control	1
GO:0010459	negative regulation of heart rate	6	0	0	1756	1	1		CD47.vs.Control	1
GO:0010460	positive regulation of heart rate	13	0	0	1757	1	1		CD47.vs.Control	1
GO:0010463	mesenchymal cell proliferation	48	0	0.01	1758	1	1		CD47.vs.Control	1
GO:0010464	regulation of mesenchymal cell proliferation	40	0	0.01	1759	1	1		CD47.vs.Control	1
GO:0010466	negative regulation of peptidase activity	145	0	0.02	1760	1	1		CD47.vs.Control	1
GO:0010467	gene expression	3877	0	0.54	1761	1	1		CD47.vs.Control	1
GO:0010468	regulation of gene expression	3046	0	0.42	1762	1	1		CD47.vs.Control	1
GO:0010469	regulation of signaling receptor activity	87	0	0.01	1763	1	1		CD47.vs.Control	1
GO:0010470	regulation of gastrulation	30	0	0	1764	1	1		CD47.vs.Control	1
GO:0010498	proteasomal protein catabolic process	405	0	0.06	1765	1	1		CD47.vs.Control	1
GO:0010499	proteasomal ubiquitin-independent protein catabolic process	23	0	0	1766	1	1		CD47.vs.Control	1
GO:0010501	RNA secondary structure unwinding	8	0	0	1767	1	1		CD47.vs.Control	1
GO:0010506	regulation of autophagy	214	0	0.03	1768	1	1		CD47.vs.Control	1
GO:0010507	negative regulation of autophagy	62	0	0.01	1769	1	1		CD47.vs.Control	1
GO:0010508	positive regulation of autophagy	108	0	0.01	1770	1	1		CD47.vs.Control	1
GO:0010511	regulation of phosphatidylinositol biosynthetic process	5	0	0	1771	1	1		CD47.vs.Control	1
GO:0010517	regulation of phospholipase activity	43	0	0.01	1772	1	1		CD47.vs.Control	1
GO:0010518	positive regulation of phospholipase activity	33	0	0	1773	1	1		CD47.vs.Control	1
GO:0010519	negative regulation of phospholipase activity	6	0	0	1774	1	1		CD47.vs.Control	1
GO:0010522	regulation of calcium ion transport into cytosol	82	0	0.01	1775	1	1		CD47.vs.Control	1
GO:0010523	negative regulation of calcium ion transport into cytosol	11	0	0	1776	1	1		CD47.vs.Control	1
GO:0010524	positive regulation of calcium ion transport into cytosol	46	0	0.01	1777	1	1		CD47.vs.Control	1
GO:0010528	regulation of transposition	16	0	0	1778	1	1		CD47.vs.Control	1
GO:0010529	negative regulation of transposition	15	0	0	1779	1	1		CD47.vs.Control	1
GO:0010533	regulation of activation of Janus kinase activity	5	0	0	1780	1	1		CD47.vs.Control	1
GO:0010543	regulation of platelet activation	27	0	0	1781	1	1		CD47.vs.Control	1
GO:0010544	negative regulation of platelet activation	14	0	0	1782	1	1		CD47.vs.Control	1
GO:0010556	regulation of macromolecule biosynthetic process	2737	0	0.38	1783	1	1		CD47.vs.Control	1
GO:0010557	positive regulation of macromolecule biosynthetic process	1488	0	0.21	1784	1	1		CD47.vs.Control	1
GO:0010558	negative regulation of macromolecule biosynthetic process	1197	0	0.17	1785	1	1		CD47.vs.Control	1
GO:0010559	regulation of glycoprotein biosynthetic process	35	0	0	1786	1	1		CD47.vs.Control	1
GO:0010560	positive regulation of glycoprotein biosynthetic process	18	0	0	1787	1	1		CD47.vs.Control	1
GO:0010561	negative regulation of glycoprotein biosynthetic process	12	0	0	1788	1	1		CD47.vs.Control	1
GO:0010562	positive regulation of phosphorus metabolic process	904	0	0.12	1789	1	1		CD47.vs.Control	1
GO:0010563	negative regulation of phosphorus metabolic process	480	0	0.07	1790	1	1		CD47.vs.Control	1
GO:0010564	regulation of cell cycle process	523	0	0.07	1791	1	1		CD47.vs.Control	1
GO:0010565	regulation of cellular ketone metabolic process	93	0	0.01	1792	1	1		CD47.vs.Control	1
GO:0010566	regulation of ketone biosynthetic process	13	0	0	1793	1	1		CD47.vs.Control	1
GO:0010569	regulation of double-strand break repair via homologous recombination	36	0	0	1794	1	1		CD47.vs.Control	1
GO:0010571	positive regulation of nuclear cell cycle DNA replication	5	0	0	1795	1	1		CD47.vs.Control	1
GO:0010572	positive regulation of platelet activation	6	0	0	1796	1	1		CD47.vs.Control	1
GO:0010573	vascular endothelial growth factor production	28	0	0	1797	1	1		CD47.vs.Control	1
GO:0010574	regulation of vascular endothelial growth factor production	26	0	0	1798	1	1		CD47.vs.Control	1
GO:0010575	positive regulation of vascular endothelial growth factor production	19	0	0	1799	1	1		CD47.vs.Control	1
GO:0010586	miRNA metabolic process	22	0	0	1800	1	1		CD47.vs.Control	1
GO:0010587	miRNA catabolic process	7	0	0	1801	1	1		CD47.vs.Control	1
GO:0010591	regulation of lamellipodium assembly	31	0	0	1802	1	1		CD47.vs.Control	1
GO:0010592	positive regulation of lamellipodium assembly	19	0	0	1803	1	1		CD47.vs.Control	1
GO:0010594	regulation of endothelial cell migration	128	0	0.02	1804	1	1		CD47.vs.Control	1
GO:0010595	positive regulation of endothelial cell migration	81	0	0.01	1805	1	1		CD47.vs.Control	1
GO:0010596	negative regulation of endothelial cell migration	42	0	0.01	1806	1	1		CD47.vs.Control	1
GO:0010603	regulation of cytoplasmic mRNA processing body assembly	8	0	0	1807	1	1		CD47.vs.Control	1
GO:0010604	positive regulation of macromolecule metabolic process	2657	0	0.37	1808	1	1		CD47.vs.Control	1
GO:0010605	negative regulation of macromolecule metabolic process	2069	0	0.29	1809	1	1		CD47.vs.Control	1
GO:0010606	positive regulation of cytoplasmic mRNA processing body assembly	5	0	0	1810	1	1		CD47.vs.Control	1
GO:0010608	posttranscriptional regulation of gene expression	388	0	0.05	1811	1	1		CD47.vs.Control	1
GO:0010611	regulation of cardiac muscle hypertrophy	60	0	0.01	1812	1	1		CD47.vs.Control	1
GO:0010612	regulation of cardiac muscle adaptation	8	0	0	1813	1	1		CD47.vs.Control	1
GO:0010613	positive regulation of cardiac muscle hypertrophy	35	0	0	1814	1	1		CD47.vs.Control	1
GO:0010614	negative regulation of cardiac muscle hypertrophy	24	0	0	1815	1	1		CD47.vs.Control	1
GO:0010616	negative regulation of cardiac muscle adaptation	6	0	0	1816	1	1		CD47.vs.Control	1
GO:0010623	programmed cell death involved in cell development	17	0	0	1817	1	1		CD47.vs.Control	1
GO:0010624	regulation of Schwann cell proliferation	6	0	0	1818	1	1		CD47.vs.Control	1
GO:0010626	negative regulation of Schwann cell proliferation	5	0	0	1819	1	1		CD47.vs.Control	1
GO:0010628	positive regulation of gene expression	1605	0	0.22	1820	1	1		CD47.vs.Control	1
GO:0010629	negative regulation of gene expression	1437	0	0.2	1821	1	1		CD47.vs.Control	1
GO:0010631	epithelial cell migration	241	0	0.03	1822	1	1		CD47.vs.Control	1
GO:0010632	regulation of epithelial cell migration	190	0	0.03	1823	1	1		CD47.vs.Control	1
GO:0010633	negative regulation of epithelial cell migration	58	0	0.01	1824	1	1		CD47.vs.Control	1
GO:0010634	positive regulation of epithelial cell migration	124	0	0.02	1825	1	1		CD47.vs.Control	1
GO:0010635	regulation of mitochondrial fusion	7	0	0	1826	1	1		CD47.vs.Control	1
GO:0010637	negative regulation of mitochondrial fusion	5	0	0	1827	1	1		CD47.vs.Control	1
GO:0010638	positive regulation of organelle organization	526	0	0.07	1828	1	1		CD47.vs.Control	1
GO:0010639	negative regulation of organelle organization	354	0	0.05	1829	1	1		CD47.vs.Control	1
GO:0010640	regulation of platelet-derived growth factor receptor signaling pathway	21	0	0	1830	1	1		CD47.vs.Control	1
GO:0010642	negative regulation of platelet-derived growth factor receptor signaling pathway	13	0	0	1831	1	1		CD47.vs.Control	1
GO:0010644	cell communication by electrical coupling	10	0	0	1832	1	1		CD47.vs.Control	1
GO:0010646	regulation of cell communication	2523	0	0.35	1833	1	1		CD47.vs.Control	1
GO:0010647	positive regulation of cell communication	1351	0	0.19	1834	1	1		CD47.vs.Control	1
GO:0010648	negative regulation of cell communication	1103	0	0.15	1835	1	1		CD47.vs.Control	1
GO:0010649	regulation of cell communication by electrical coupling	5	0	0	1836	1	1		CD47.vs.Control	1
GO:0010656	negative regulation of muscle cell apoptotic process	46	0	0.01	1837	1	1		CD47.vs.Control	1
GO:0010657	muscle cell apoptotic process	85	0	0.01	1838	1	1		CD47.vs.Control	1
GO:0010658	striated muscle cell apoptotic process	50	0	0.01	1839	1	1		CD47.vs.Control	1
GO:0010659	cardiac muscle cell apoptotic process	47	0	0.01	1840	1	1		CD47.vs.Control	1
GO:0010660	regulation of muscle cell apoptotic process	80	0	0.01	1841	1	1		CD47.vs.Control	1
GO:0010661	positive regulation of muscle cell apoptotic process	34	0	0	1842	1	1		CD47.vs.Control	1
GO:0010662	regulation of striated muscle cell apoptotic process	46	0	0.01	1843	1	1		CD47.vs.Control	1
GO:0010663	positive regulation of striated muscle cell apoptotic process	18	0	0	1844	1	1		CD47.vs.Control	1
GO:0010664	negative regulation of striated muscle cell apoptotic process	29	0	0	1845	1	1		CD47.vs.Control	1
GO:0010665	regulation of cardiac muscle cell apoptotic process	43	0	0.01	1846	1	1		CD47.vs.Control	1
GO:0010666	positive regulation of cardiac muscle cell apoptotic process	17	0	0	1847	1	1		CD47.vs.Control	1
GO:0010667	negative regulation of cardiac muscle cell apoptotic process	26	0	0	1848	1	1		CD47.vs.Control	1
GO:0010668	ectodermal cell differentiation	5	0	0	1849	1	1		CD47.vs.Control	1
GO:0010669	epithelial structure maintenance	16	0	0	1850	1	1		CD47.vs.Control	1
GO:0010675	regulation of cellular carbohydrate metabolic process	118	0	0.02	1851	1	1		CD47.vs.Control	1
GO:0010676	positive regulation of cellular carbohydrate metabolic process	47	0	0.01	1852	1	1		CD47.vs.Control	1
GO:0010677	negative regulation of cellular carbohydrate metabolic process	35	0	0	1853	1	1		CD47.vs.Control	1
GO:0010692	regulation of alkaline phosphatase activity	9	0	0	1854	1	1		CD47.vs.Control	1
GO:0010694	positive regulation of alkaline phosphatase activity	5	0	0	1855	1	1		CD47.vs.Control	1
GO:0010712	regulation of collagen metabolic process	46	0	0.01	1856	1	1		CD47.vs.Control	1
GO:0010713	negative regulation of collagen metabolic process	13	0	0	1857	1	1		CD47.vs.Control	1
GO:0010714	positive regulation of collagen metabolic process	30	0	0	1858	1	1		CD47.vs.Control	1
GO:0010715	regulation of extracellular matrix disassembly	12	0	0	1859	1	1		CD47.vs.Control	1
GO:0010717	regulation of epithelial to mesenchymal transition	77	0	0.01	1860	1	1		CD47.vs.Control	1
GO:0010718	positive regulation of epithelial to mesenchymal transition	42	0	0.01	1861	1	1		CD47.vs.Control	1
GO:0010719	negative regulation of epithelial to mesenchymal transition	25	0	0	1862	1	1		CD47.vs.Control	1
GO:0010720	positive regulation of cell development	520	0	0.07	1863	1	1		CD47.vs.Control	1
GO:0010721	negative regulation of cell development	291	0	0.04	1864	1	1		CD47.vs.Control	1
GO:0010727	negative regulation of hydrogen peroxide metabolic process	7	0	0	1865	1	1		CD47.vs.Control	1
GO:0010728	regulation of hydrogen peroxide biosynthetic process	5	0	0	1866	1	1		CD47.vs.Control	1
GO:0010737	protein kinase A signaling	26	0	0	1867	1	1		CD47.vs.Control	1
GO:0010738	regulation of protein kinase A signaling	17	0	0	1868	1	1		CD47.vs.Control	1
GO:0010739	positive regulation of protein kinase A signaling	8	0	0	1869	1	1		CD47.vs.Control	1
GO:0010742	macrophage derived foam cell differentiation	22	0	0	1870	1	1		CD47.vs.Control	1
GO:0010743	regulation of macrophage derived foam cell differentiation	18	0	0	1871	1	1		CD47.vs.Control	1
GO:0010744	positive regulation of macrophage derived foam cell differentiation	10	0	0	1872	1	1		CD47.vs.Control	1
GO:0010745	negative regulation of macrophage derived foam cell differentiation	8	0	0	1873	1	1		CD47.vs.Control	1
GO:0010746	regulation of plasma membrane long-chain fatty acid transport	6	0	0	1874	1	1		CD47.vs.Control	1
GO:0010749	regulation of nitric oxide mediated signal transduction	7	0	0	1875	1	1		CD47.vs.Control	1
GO:0010752	regulation of cGMP-mediated signaling	11	0	0	1876	1	1		CD47.vs.Control	1
GO:0010753	positive regulation of cGMP-mediated signaling	5	0	0	1877	1	1		CD47.vs.Control	1
GO:0010754	negative regulation of cGMP-mediated signaling	5	0	0	1878	1	1		CD47.vs.Control	1
GO:0010755	regulation of plasminogen activation	11	0	0	1879	1	1		CD47.vs.Control	1
GO:0010756	positive regulation of plasminogen activation	5	0	0	1880	1	1		CD47.vs.Control	1
GO:0010757	negative regulation of plasminogen activation	5	0	0	1881	1	1		CD47.vs.Control	1
GO:0010758	regulation of macrophage chemotaxis	27	0	0	1882	1	1		CD47.vs.Control	1
GO:0010759	positive regulation of macrophage chemotaxis	18	0	0	1883	1	1		CD47.vs.Control	1
GO:0010760	negative regulation of macrophage chemotaxis	6	0	0	1884	1	1		CD47.vs.Control	1
GO:0010761	fibroblast migration	44	0	0.01	1885	1	1		CD47.vs.Control	1
GO:0010762	regulation of fibroblast migration	33	0	0	1886	1	1		CD47.vs.Control	1
GO:0010763	positive regulation of fibroblast migration	16	0	0	1887	1	1		CD47.vs.Control	1
GO:0010764	negative regulation of fibroblast migration	7	0	0	1888	1	1		CD47.vs.Control	1
GO:0010765	positive regulation of sodium ion transport	39	0	0.01	1889	1	1		CD47.vs.Control	1
GO:0010766	negative regulation of sodium ion transport	17	0	0	1890	1	1		CD47.vs.Control	1
GO:0010769	regulation of cell morphogenesis involved in differentiation	286	0	0.04	1891	1	1		CD47.vs.Control	1
GO:0010770	positive regulation of cell morphogenesis involved in differentiation	159	0	0.02	1892	1	1		CD47.vs.Control	1
GO:0010771	negative regulation of cell morphogenesis involved in differentiation	82	0	0.01	1893	1	1		CD47.vs.Control	1
GO:0010792	DNA double-strand break processing involved in repair via single-strand annealing	5	0	0	1894	1	1		CD47.vs.Control	1
GO:0010793	regulation of mRNA export from nucleus	7	0	0	1895	1	1		CD47.vs.Control	1
GO:0010799	regulation of peptidyl-threonine phosphorylation	42	0	0.01	1896	1	1		CD47.vs.Control	1
GO:0010800	positive regulation of peptidyl-threonine phosphorylation	27	0	0	1897	1	1		CD47.vs.Control	1
GO:0010801	negative regulation of peptidyl-threonine phosphorylation	16	0	0	1898	1	1		CD47.vs.Control	1
GO:0010803	regulation of tumor necrosis factor-mediated signaling pathway	25	0	0	1899	1	1		CD47.vs.Control	1
GO:0010804	negative regulation of tumor necrosis factor-mediated signaling pathway	11	0	0	1900	1	1		CD47.vs.Control	1
GO:0010807	regulation of synaptic vesicle priming	9	0	0	1901	1	1		CD47.vs.Control	1
GO:0010810	regulation of cell-substrate adhesion	173	0	0.02	1902	1	1		CD47.vs.Control	1
GO:0010811	positive regulation of cell-substrate adhesion	107	0	0.01	1903	1	1		CD47.vs.Control	1
GO:0010812	negative regulation of cell-substrate adhesion	47	0	0.01	1904	1	1		CD47.vs.Control	1
GO:0010815	bradykinin catabolic process	6	0	0	1905	1	1		CD47.vs.Control	1
GO:0010817	regulation of hormone levels	363	0	0.05	1906	1	1		CD47.vs.Control	1
GO:0010818	T cell chemotaxis	18	0	0	1907	1	1		CD47.vs.Control	1
GO:0010819	regulation of T cell chemotaxis	14	0	0	1908	1	1		CD47.vs.Control	1
GO:0010820	positive regulation of T cell chemotaxis	13	0	0	1909	1	1		CD47.vs.Control	1
GO:0010821	regulation of mitochondrion organization	124	0	0.02	1910	1	1		CD47.vs.Control	1
GO:0010822	positive regulation of mitochondrion organization	69	0	0.01	1911	1	1		CD47.vs.Control	1
GO:0010823	negative regulation of mitochondrion organization	49	0	0.01	1912	1	1		CD47.vs.Control	1
GO:0010824	regulation of centrosome duplication	41	0	0.01	1913	1	1		CD47.vs.Control	1
GO:0010825	positive regulation of centrosome duplication	9	0	0	1914	1	1		CD47.vs.Control	1
GO:0010826	negative regulation of centrosome duplication	12	0	0	1915	1	1		CD47.vs.Control	1
GO:0010827	regulation of glucose transmembrane transport	67	0	0.01	1916	1	1		CD47.vs.Control	1
GO:0010828	positive regulation of glucose transmembrane transport	35	0	0	1917	1	1		CD47.vs.Control	1
GO:0010829	negative regulation of glucose transmembrane transport	21	0	0	1918	1	1		CD47.vs.Control	1
GO:0010830	regulation of myotube differentiation	48	0	0.01	1919	1	1		CD47.vs.Control	1
GO:0010831	positive regulation of myotube differentiation	27	0	0	1920	1	1		CD47.vs.Control	1
GO:0010832	negative regulation of myotube differentiation	14	0	0	1921	1	1		CD47.vs.Control	1
GO:0010833	telomere maintenance via telomere lengthening	72	0	0.01	1922	1	1		CD47.vs.Control	1
GO:0010835	regulation of protein ADP-ribosylation	9	0	0	1923	1	1		CD47.vs.Control	1
GO:0010837	regulation of keratinocyte proliferation	24	0	0	1924	1	1		CD47.vs.Control	1
GO:0010838	positive regulation of keratinocyte proliferation	5	0	0	1925	1	1		CD47.vs.Control	1
GO:0010839	negative regulation of keratinocyte proliferation	12	0	0	1926	1	1		CD47.vs.Control	1
GO:0010842	retina layer formation	13	0	0	1927	1	1		CD47.vs.Control	1
GO:0010862	positive regulation of pathway-restricted SMAD protein phosphorylation	33	0	0	1928	1	1		CD47.vs.Control	1
GO:0010863	positive regulation of phospholipase C activity	20	0	0	1929	1	1		CD47.vs.Control	1
GO:0010866	regulation of triglyceride biosynthetic process	17	0	0	1930	1	1		CD47.vs.Control	1
GO:0010867	positive regulation of triglyceride biosynthetic process	14	0	0	1931	1	1		CD47.vs.Control	1
GO:0010869	regulation of receptor biosynthetic process	17	0	0	1932	1	1		CD47.vs.Control	1
GO:0010870	positive regulation of receptor biosynthetic process	9	0	0	1933	1	1		CD47.vs.Control	1
GO:0010871	negative regulation of receptor biosynthetic process	5	0	0	1934	1	1		CD47.vs.Control	1
GO:0010872	regulation of cholesterol esterification	7	0	0	1935	1	1		CD47.vs.Control	1
GO:0010873	positive regulation of cholesterol esterification	5	0	0	1936	1	1		CD47.vs.Control	1
GO:0010874	regulation of cholesterol efflux	18	0	0	1937	1	1		CD47.vs.Control	1
GO:0010875	positive regulation of cholesterol efflux	13	0	0	1938	1	1		CD47.vs.Control	1
GO:0010876	lipid localization	280	0	0.04	1939	1	1		CD47.vs.Control	1
GO:0010878	cholesterol storage	13	0	0	1940	1	1		CD47.vs.Control	1
GO:0010880	regulation of release of sequestered calcium ion into cytosol by sarcoplasmic reticulum	13	0	0	1941	1	1		CD47.vs.Control	1
GO:0010881	regulation of cardiac muscle contraction by regulation of the release of sequestered calcium ion	5	0	0	1942	1	1		CD47.vs.Control	1
GO:0010882	regulation of cardiac muscle contraction by calcium ion signaling	10	0	0	1943	1	1		CD47.vs.Control	1
GO:0010883	regulation of lipid storage	34	0	0	1944	1	1		CD47.vs.Control	1
GO:0010884	positive regulation of lipid storage	18	0	0	1945	1	1		CD47.vs.Control	1
GO:0010885	regulation of cholesterol storage	11	0	0	1946	1	1		CD47.vs.Control	1
GO:0010886	positive regulation of cholesterol storage	6	0	0	1947	1	1		CD47.vs.Control	1
GO:0010887	negative regulation of cholesterol storage	5	0	0	1948	1	1		CD47.vs.Control	1
GO:0010888	negative regulation of lipid storage	13	0	0	1949	1	1		CD47.vs.Control	1
GO:0010889	regulation of sequestering of triglyceride	10	0	0	1950	1	1		CD47.vs.Control	1
GO:0010890	positive regulation of sequestering of triglyceride	6	0	0	1951	1	1		CD47.vs.Control	1
GO:0010893	positive regulation of steroid biosynthetic process	23	0	0	1952	1	1		CD47.vs.Control	1
GO:0010894	negative regulation of steroid biosynthetic process	21	0	0	1953	1	1		CD47.vs.Control	1
GO:0010896	regulation of triglyceride catabolic process	6	0	0	1954	1	1		CD47.vs.Control	1
GO:0010906	regulation of glucose metabolic process	96	0	0.01	1955	1	1		CD47.vs.Control	1
GO:0010907	positive regulation of glucose metabolic process	33	0	0	1956	1	1		CD47.vs.Control	1
GO:0010917	negative regulation of mitochondrial membrane potential	10	0	0	1957	1	1		CD47.vs.Control	1
GO:0010918	positive regulation of mitochondrial membrane potential	11	0	0	1958	1	1		CD47.vs.Control	1
GO:0010919	regulation of inositol phosphate biosynthetic process	9	0	0	1959	1	1		CD47.vs.Control	1
GO:0010921	regulation of phosphatase activity	106	0	0.01	1960	1	1		CD47.vs.Control	1
GO:0010922	positive regulation of phosphatase activity	29	0	0	1961	1	1		CD47.vs.Control	1
GO:0010923	negative regulation of phosphatase activity	66	0	0.01	1962	1	1		CD47.vs.Control	1
GO:0010927	cellular component assembly involved in morphogenesis	89	0	0.01	1963	1	1		CD47.vs.Control	1
GO:0010934	macrophage cytokine production	15	0	0	1964	1	1		CD47.vs.Control	1
GO:0010935	regulation of macrophage cytokine production	13	0	0	1965	1	1		CD47.vs.Control	1
GO:0010936	negative regulation of macrophage cytokine production	5	0	0	1966	1	1		CD47.vs.Control	1
GO:0010939	regulation of necrotic cell death	27	0	0	1967	1	1		CD47.vs.Control	1
GO:0010940	positive regulation of necrotic cell death	6	0	0	1968	1	1		CD47.vs.Control	1
GO:0010941	regulation of cell death	1420	0	0.2	1969	1	1		CD47.vs.Control	1
GO:0010942	positive regulation of cell death	608	0	0.08	1970	1	1		CD47.vs.Control	1
GO:0010944	negative regulation of transcription by competitive promoter binding	8	0	0	1971	1	1		CD47.vs.Control	1
GO:0010948	negative regulation of cell cycle process	206	0	0.03	1972	1	1		CD47.vs.Control	1
GO:0010950	positive regulation of endopeptidase activity	138	0	0.02	1973	1	1		CD47.vs.Control	1
GO:0010951	negative regulation of endopeptidase activity	116	0	0.02	1974	1	1		CD47.vs.Control	1
GO:0010952	positive regulation of peptidase activity	146	0	0.02	1975	1	1		CD47.vs.Control	1
GO:0010954	positive regulation of protein processing	21	0	0	1976	1	1		CD47.vs.Control	1
GO:0010955	negative regulation of protein processing	30	0	0	1977	1	1		CD47.vs.Control	1
GO:0010957	negative regulation of vitamin D biosynthetic process	5	0	0	1978	1	1		CD47.vs.Control	1
GO:0010958	regulation of amino acid import across plasma membrane	8	0	0	1979	1	1		CD47.vs.Control	1
GO:0010959	regulation of metal ion transport	316	0	0.04	1980	1	1		CD47.vs.Control	1
GO:0010960	magnesium ion homeostasis	12	0	0	1981	1	1		CD47.vs.Control	1
GO:0010962	regulation of glucan biosynthetic process	23	0	0	1982	1	1		CD47.vs.Control	1
GO:0010965	regulation of mitotic sister chromatid separation	57	0	0.01	1983	1	1		CD47.vs.Control	1
GO:0010966	regulation of phosphate transport	6	0	0	1984	1	1		CD47.vs.Control	1
GO:0010968	regulation of microtubule nucleation	5	0	0	1985	1	1		CD47.vs.Control	1
GO:0010970	transport along microtubule	139	0	0.02	1986	1	1		CD47.vs.Control	1
GO:0010971	positive regulation of G2/M transition of mitotic cell cycle	27	0	0	1987	1	1		CD47.vs.Control	1
GO:0010972	negative regulation of G2/M transition of mitotic cell cycle	41	0	0.01	1988	1	1		CD47.vs.Control	1
GO:0010975	regulation of neuron projection development	486	0	0.07	1989	1	1		CD47.vs.Control	1
GO:0010976	positive regulation of neuron projection development	300	0	0.04	1990	1	1		CD47.vs.Control	1
GO:0010977	negative regulation of neuron projection development	142	0	0.02	1991	1	1		CD47.vs.Control	1
GO:0010984	regulation of lipoprotein particle clearance	15	0	0	1992	1	1		CD47.vs.Control	1
GO:0010985	negative regulation of lipoprotein particle clearance	7	0	0	1993	1	1		CD47.vs.Control	1
GO:0010986	positive regulation of lipoprotein particle clearance	6	0	0	1994	1	1		CD47.vs.Control	1
GO:0010988	regulation of low-density lipoprotein particle clearance	9	0	0	1995	1	1		CD47.vs.Control	1
GO:0010989	negative regulation of low-density lipoprotein particle clearance	5	0	0	1996	1	1		CD47.vs.Control	1
GO:0010990	regulation of SMAD protein complex assembly	5	0	0	1997	1	1		CD47.vs.Control	1
GO:0010992	ubiquitin recycling	7	0	0	1998	1	1		CD47.vs.Control	1
GO:0010996	response to auditory stimulus	12	0	0	1999	1	1		CD47.vs.Control	1
[truncated: 200,465+ more rows]
