# Supplementary material for: Dual checkpoint blockade of CD47 and PD-L1 using an affinity-tuned bispecific antibody maximizes antitumor immunity
Source: HighWire-hosted journal article supplement (doi:10.1136/jitc-2021-003464), 2021-10-01
Supplement: jitc-2021-003464supp006_data_supplement.xlsx [file jitc-2021-003464supp006_data_supplement.xlsx]

## Sheet: CD8 T cell clusters DE genes
p_val	avg_logFC	pct.1	pct.2	p_val_adj	cluster	gene
6.47317e-161	0.788226	0.97	0.901	1.13643e-156	CD8+ T-1	Ms4a6b
3.03846e-145	0.772032	0.692	0.221	5.33432e-141	CD8+ T-1	Itgb7
8.16901e-145	0.786362	0.641	0.221	1.43415e-140	CD8+ T-1	Gramd3
2.52993e-144	0.807174	0.694	0.241	4.44154e-140	CD8+ T-1	Cxcr3
8.21792e-142	0.768688	0.406	0.046	1.44274e-137	CD8+ T-1	Tcf7
2.13366e-123	1.17725	0.46	0.096	3.74586e-119	CD8+ T-1	Klf2
1.71742e-120	0.827588	0.865	0.751	3.0151e-116	CD8+ T-1	Epsti1
6.5347e-119	0.566632	0.359	0.044	1.14723e-114	CD8+ T-1	S1pr1
9.2774e-116	0.639617	0.915	0.802	1.62874e-111	CD8+ T-1	Gimap6
4.14243e-115	0.926662	0.845	0.645	7.27245e-111	CD8+ T-1	Samhd1
7.99429e-111	0.605044	0.351	0.048	1.40348e-106	CD8+ T-1	Klf3
1.28382e-110	0.488254	0.963	0.882	2.25387e-106	CD8+ T-1	Ptpn18
4.52666e-106	0.553945	0.505	0.143	7.947e-102	CD8+ T-1	Gm26740
5.15842e-106	0.684738	0.921	0.81	9.05613e-102	CD8+ T-1	Slfn2
1.48731e-104	0.861943	0.712	0.423	2.61112e-100	CD8+ T-1	Slfn1
6.42514e-104	1.31372	0.525	0.179	1.128e-99	CD8+ T-1	Ifit3
2.41111e-102	0.610881	0.464	0.133	4.23295e-98	CD8+ T-1	Gm2682
4.65771e-102	0.813225	0.661	0.315	8.17708e-98	CD8+ T-1	Emb
4.04915e-97	1.23516	0.489	0.157	7.10869e-93	CD8+ T-1	Ifit1
3.61142e-90	0.351383	0.998	0.983	6.34021e-86	CD8+ T-1	Malat1
7.94359e-89	0.719014	0.817	0.606	1.39458e-84	CD8+ T-1	Txnip
1.92802e-84	0.667406	0.718	0.502	3.38484e-80	CD8+ T-1	Arl4c
3.55276e-84	0.481752	0.991	0.954	6.23722e-80	CD8+ T-1	Ms4a4b
7.91756e-84	1.3712	0.822	0.677	1.39001e-79	CD8+ T-1	Ccl5
1.89431e-83	0.667018	0.832	0.654	3.32565e-79	CD8+ T-1	Ccnd2
2.0521e-82	0.573167	0.366	0.089	3.60267e-78	CD8+ T-1	Lef1
2.20566e-82	0.300412	0.993	0.968	3.87226e-78	CD8+ T-1	Rpl19
4.42702e-82	0.571301	0.903	0.855	7.77208e-78	CD8+ T-1	Sp100
7.83281e-80	0.429617	0.926	0.876	1.37513e-75	CD8+ T-1	Saraf
8.33086e-80	0.627292	0.463	0.172	1.46257e-75	CD8+ T-1	Slco3a1
9.40881e-80	0.645687	0.405	0.126	1.65181e-75	CD8+ T-1	Ifit1bl1
1.69043e-79	0.72337	0.592	0.314	2.96772e-75	CD8+ T-1	Ifi208
2.53265e-77	0.466201	0.99	0.954	4.44631e-73	CD8+ T-1	Rps27
5.95009e-77	0.548875	0.543	0.256	1.0446e-72	CD8+ T-1	Ssh2
4.19808e-76	0.694741	0.3	0.058	7.37015e-72	CD8+ T-1	Ifit3b
1.19752e-75	0.67781	0.614	0.338	2.10237e-71	CD8+ T-1	Rtp4
1.44823e-75	0.602259	0.361	0.094	2.54252e-71	CD8+ T-1	Slamf6
7.53573e-75	0.538668	0.806	0.672	1.32297e-70	CD8+ T-1	Bcl11b
8.32191e-75	0.530717	0.903	0.866	1.46099e-70	CD8+ T-1	Gimap3
1.93873e-74	0.30241	0.993	0.978	3.40363e-70	CD8+ T-1	Tpt1
6.50633e-73	0.605576	0.858	0.759	1.14225e-68	CD8+ T-1	Zfp36l2
2.60439e-72	0.658484	0.767	0.603	4.57227e-68	CD8+ T-1	9930111J21Rik2
8.59027e-71	0.267598	0.995	0.978	1.50811e-66	CD8+ T-1	Fau
1.09997e-70	0.840593	0.672	0.467	1.93111e-66	CD8+ T-1	Irf7
2.14024e-70	0.447477	0.903	0.827	3.75741e-66	CD8+ T-1	Skap1
3.74638e-70	0.682714	0.823	0.748	6.57714e-66	CD8+ T-1	Ifi47
1.09786e-65	0.439387	0.941	0.882	1.9274e-61	CD8+ T-1	Gimap4
1.42921e-64	0.632307	0.521	0.265	2.50912e-60	CD8+ T-1	Tsc22d3
1.87703e-64	0.720863	0.708	0.552	3.29532e-60	CD8+ T-1	Igtp
5.62459e-64	0.659455	0.699	0.524	9.87453e-60	CD8+ T-1	Ifi206
1.20398e-63	0.552273	0.677	0.494	2.11371e-59	CD8+ T-1	Trim12a
8.40142e-62	0.332814	0.993	0.965	1.47495e-57	CD8+ T-1	Shisa5
1.82834e-59	0.394421	0.959	0.908	3.20983e-55	CD8+ T-1	Ly6e
1.54491e-57	0.444909	0.376	0.136	2.71224e-53	CD8+ T-1	Ripor2
1.87667e-57	0.362703	0.473	0.212	3.29468e-53	CD8+ T-1	Tespa1
3.58353e-57	0.492392	0.358	0.128	6.29125e-53	CD8+ T-1	Rasgrp2
4.92496e-57	0.26648	0.994	0.945	8.64626e-53	CD8+ T-1	Rps14
4.00045e-56	0.669151	0.693	0.561	7.02318e-52	CD8+ T-1	Zbp1
7.28724e-56	0.448924	0.191	0.026	1.27935e-51	CD8+ T-1	Sell
1.0321e-55	0.3605	0.903	0.858	1.81196e-51	CD8+ T-1	Arhgap45
3.0738e-54	0.443234	0.74	0.662	5.39637e-50	CD8+ T-1	Apbb1ip
2.25189e-53	0.657296	0.703	0.567	3.95342e-49	CD8+ T-1	Ifi209
8.15374e-53	0.452375	0.781	0.708	1.43147e-48	CD8+ T-1	Cdk2ap2
2.68834e-52	0.325022	0.226	0.049	4.71965e-48	CD8+ T-1	Tgtp1
7.28227e-51	0.987783	0.676	0.524	1.27847e-46	CD8+ T-1	Ly6c2
7.47845e-51	0.421185	0.802	0.692	1.31292e-46	CD8+ T-1	Ypel3
1.5221e-50	0.306314	0.99	0.966	2.6722e-46	CD8+ T-1	Rps24
2.06822e-50	0.51655	0.745	0.663	3.63098e-46	CD8+ T-1	Sp110
3.5387e-50	0.399701	0.928	0.905	6.21254e-46	CD8+ T-1	Ifngr1
2.61755e-49	0.528479	0.869	0.813	4.59537e-45	CD8+ T-1	Ifi203
8.05315e-49	0.415045	0.891	0.856	1.41381e-44	CD8+ T-1	Lat
1.48076e-48	1.09024	0.575	0.398	2.59962e-44	CD8+ T-1	Isg15
5.79275e-47	0.2207	0.141	0.015	1.01697e-42	CD8+ T-1	Nsg2
9.54893e-47	0.327948	0.993	0.956	1.67641e-42	CD8+ T-1	Tmsb10
1.12462e-46	0.569762	0.532	0.338	1.97438e-42	CD8+ T-1	Rgs10
1.34876e-46	0.483888	0.712	0.627	2.36788e-42	CD8+ T-1	Zcchc11
1.83148e-46	0.489319	0.765	0.701	3.21535e-42	CD8+ T-1	Gm8369
5.07872e-46	0.367086	0.813	0.763	8.9162e-42	CD8+ T-1	Scand1
6.63827e-46	0.571666	0.582	0.428	1.16541e-41	CD8+ T-1	Irgm1
1.49534e-45	0.282291	0.99	0.973	2.62522e-41	CD8+ T-1	Rps16
4.9601e-45	0.302172	0.219	0.053	8.70795e-41	CD8+ T-1	Pik3ip1
5.83062e-45	0.229341	0.134	0.014	1.02362e-40	CD8+ T-1	Rflnb
3.8326e-44	0.395385	0.783	0.722	6.72852e-40	CD8+ T-1	Ablim1
8.43919e-44	0.480498	0.588	0.429	1.48158e-39	CD8+ T-1	Foxp1
1.92231e-43	0.333662	0.957	0.891	3.37481e-39	CD8+ T-1	Arhgdib
2.49603e-43	0.244665	0.967	0.943	4.38203e-39	CD8+ T-1	Mbnl1
3.42586e-43	0.418889	0.354	0.158	6.01444e-39	CD8+ T-1	Rasa3
3.44646e-43	0.410481	0.877	0.83	6.05061e-39	CD8+ T-1	Limd2
1.09893e-42	0.678766	0.296	0.108	1.92928e-38	CD8+ T-1	Slfn5
1.78949e-42	0.383458	0.855	0.816	3.14162e-38	CD8+ T-1	Rps27rt
2.46389e-42	0.340772	0.911	0.881	4.3256e-38	CD8+ T-1	Npc2
9.4814e-42	0.251062	0.131	0.015	1.66456e-37	CD8+ T-1	Il6ra
2.66006e-41	0.621347	0.259	0.082	4.67e-37	CD8+ T-1	Rsad2
3.92451e-41	0.351751	0.267	0.091	6.88987e-37	CD8+ T-1	1700025G04Rik
8.83652e-41	0.450283	0.316	0.127	1.55134e-36	CD8+ T-1	Oas3
1.00473e-40	0.414593	0.78	0.745	1.76391e-36	CD8+ T-1	Ppp1r12a
1.44016e-40	0.566912	0.832	0.835	2.52834e-36	CD8+ T-1	Stat1
2.34186e-40	0.620211	0.446	0.27	4.11137e-36	CD8+ T-1	Gbp2
2.54946e-40	0.407351	0.735	0.685	4.47583e-36	CD8+ T-1	Slc9a3r1
1.10115e-39	0.410885	0.348	0.163	1.93319e-35	CD8+ T-1	Tgtp2
1.13487e-39	0.426511	0.573	0.428	1.99238e-35	CD8+ T-1	Chd3
2.65631e-39	0.474783	0.681	0.585	4.66342e-35	CD8+ T-1	Pdcd4
5.56744e-38	0.424522	0.798	0.781	9.7742e-34	CD8+ T-1	Psmb10
6.61421e-38	0.399045	0.587	0.466	1.16119e-33	CD8+ T-1	Acp5
1.72141e-37	0.137773	0.103	0.008	3.02211e-33	CD8+ T-1	Tdrp
3.43729e-37	0.232991	0.953	0.943	6.0345e-33	CD8+ T-1	Lck
3.44614e-37	0.335161	0.886	0.862	6.05004e-33	CD8+ T-1	Fyb
6.50421e-37	0.435836	0.724	0.691	1.14188e-32	CD8+ T-1	Dnajc15
7.62901e-37	0.430819	0.545	0.386	1.33935e-32	CD8+ T-1	Tecpr1
8.33779e-37	0.531089	0.501	0.338	1.46378e-32	CD8+ T-1	Ifi213
2.19856e-36	0.332015	0.931	0.884	3.85979e-32	CD8+ T-1	Hcst
2.34764e-36	0.540097	0.226	0.071	4.12151e-32	CD8+ T-1	Iigp1
4.10201e-36	0.559691	0.796	0.766	7.2015e-32	CD8+ T-1	Bst2
7.06381e-36	0.388448	0.72	0.669	1.24012e-31	CD8+ T-1	Klf13
1.21156e-35	0.463205	0.397	0.223	2.12701e-31	CD8+ T-1	Phf11c
3.40103e-35	0.429862	0.512	0.376	5.97085e-31	CD8+ T-1	Fam189b
5.08507e-35	0.234028	0.988	0.958	8.92735e-31	CD8+ T-1	Rps10
7.25247e-35	0.553186	0.71	0.673	1.27324e-30	CD8+ T-1	Gbp7
7.48767e-35	0.338642	0.207	0.06	1.31454e-30	CD8+ T-1	Oasl2
1.13656e-34	0.272523	0.952	0.933	1.99534e-30	CD8+ T-1	Selplg
1.48374e-34	0.425569	0.676	0.647	2.60486e-30	CD8+ T-1	Cnp
1.76899e-34	0.339054	0.28	0.114	3.10564e-30	CD8+ T-1	Gpr18
1.8141e-34	0.423178	0.537	0.419	3.18483e-30	CD8+ T-1	Dgka
1.10664e-33	0.330258	0.832	0.798	1.94282e-29	CD8+ T-1	Clec2d
1.15197e-33	0.356019	0.793	0.778	2.02239e-29	CD8+ T-1	Nsd3
1.45308e-33	0.339111	0.309	0.137	2.55103e-29	CD8+ T-1	Gm20186
1.48311e-33	0.225391	0.162	0.038	2.60375e-29	CD8+ T-1	Cmah
6.17446e-33	0.406701	0.649	0.571	1.08399e-28	CD8+ T-1	Evl
1.07746e-32	0.202852	0.993	0.968	1.89158e-28	CD8+ T-1	Rpl18
6.98552e-32	0.546329	0.842	0.844	1.22638e-27	CD8+ T-1	Ly6a
1.65198e-31	0.37069	0.613	0.537	2.90022e-27	CD8+ T-1	Tpst2
1.94979e-31	0.338933	0.761	0.743	3.42305e-27	CD8+ T-1	Zc3hav1
3.39691e-31	0.428051	0.844	0.822	5.96361e-27	CD8+ T-1	Mndal
3.6571e-31	0.198211	0.895	0.885	6.42041e-27	CD8+ T-1	H2-Q4
1.0589e-30	0.2975	0.905	0.883	1.859e-26	CD8+ T-1	Stk17b
1.13692e-30	0.224086	0.889	0.853	1.99597e-26	CD8+ T-1	Cd53
1.2508e-30	0.166186	0.118	0.02	2.19591e-26	CD8+ T-1	Id3
1.33336e-30	0.250744	0.902	0.891	2.34085e-26	CD8+ T-1	Msn
1.59288e-30	0.4546	0.636	0.575	2.79647e-26	CD8+ T-1	Irf1
3.46983e-30	0.402039	0.355	0.198	6.09164e-26	CD8+ T-1	Kbtbd11
9.66115e-30	0.201818	0.99	0.965	1.69611e-25	CD8+ T-1	Ubb
1.1904e-29	0.279402	0.938	0.893	2.08987e-25	CD8+ T-1	Psme1
1.36559e-29	0.265724	0.869	0.857	2.39744e-25	CD8+ T-1	Mcl1
1.72353e-29	0.38101	0.262	0.114	3.02582e-25	CD8+ T-1	Socs3
1.86173e-29	0.354426	0.634	0.572	3.26845e-25	CD8+ T-1	Grap2
1.89676e-29	0.446669	0.306	0.143	3.32995e-25	CD8+ T-1	Cd7
2.92194e-29	0.305967	0.8	0.786	5.12976e-25	CD8+ T-1	Ccnd3
5.81802e-29	0.179846	0.108	0.017	1.02141e-24	CD8+ T-1	Dtx1
6.73372e-29	0.336172	0.45	0.311	1.18217e-24	CD8+ T-1	Ifnar2
6.77515e-29	0.306929	0.803	0.789	1.18944e-24	CD8+ T-1	Ppp1r18
9.52455e-29	0.268354	0.905	0.864	1.67213e-24	CD8+ T-1	Cox7a2l
3.26955e-28	0.316059	0.714	0.686	5.74003e-24	CD8+ T-1	Rapgef6
1.16685e-27	0.180449	0.101	0.016	2.04852e-23	CD8+ T-1	Treml2
1.74702e-27	0.512412	0.881	0.803	3.06706e-23	CD8+ T-1	Ifi27l2a
3.73598e-27	0.294863	0.785	0.762	6.55889e-23	CD8+ T-1	Rabac1
5.13092e-27	0.190041	0.979	0.953	9.00784e-23	CD8+ T-1	Itm2b
7.58684e-27	0.292985	0.809	0.787	1.33195e-22	CD8+ T-1	Supt4a
9.5393e-27	0.371533	0.656	0.583	1.67472e-22	CD8+ T-1	Btg2
1.12738e-26	0.230789	0.973	0.945	1.97923e-22	CD8+ T-1	Rac2
1.33381e-26	0.281331	0.295	0.147	2.34164e-22	CD8+ T-1	Ly9
1.96733e-26	0.286614	0.804	0.793	3.45384e-22	CD8+ T-1	Gpsm3
2.95285e-26	0.186229	0.988	0.958	5.18402e-22	CD8+ T-1	Rps13
3.09716e-26	0.369749	0.887	0.863	5.43737e-22	CD8+ T-1	H2-T22
5.68667e-26	0.448503	0.514	0.388	9.98351e-22	CD8+ T-1	Cd69
6.30416e-26	0.32729	0.26	0.119	1.10676e-21	CD8+ T-1	Ddx60
8.89955e-26	0.176884	0.952	0.931	1.56241e-21	CD8+ T-1	Cyba
1.18393e-25	0.330185	0.635	0.588	2.0785e-21	CD8+ T-1	Prkcq
2.25158e-25	0.238221	0.249	0.113	3.95287e-21	CD8+ T-1	Rab37
2.27022e-25	0.252005	0.167	0.051	3.9856e-21	CD8+ T-1	Ccr7
3.24153e-25	0.389945	0.542	0.481	5.69082e-21	CD8+ T-1	Rnf138
3.30608e-25	0.350476	0.76	0.769	5.80416e-21	CD8+ T-1	Hopx
3.75327e-25	0.16869	0.131	0.033	6.58924e-21	CD8+ T-1	Sh3bp5
4.15762e-25	0.294487	0.192	0.065	7.29912e-21	CD8+ T-1	Cd4
7.08587e-25	0.185111	0.989	0.969	1.244e-20	CD8+ T-1	Rpl9
1.41072e-24	0.250408	0.991	0.972	2.47666e-20	CD8+ T-1	Rplp1
1.8716e-24	0.378566	0.436	0.326	3.28578e-20	CD8+ T-1	Klhl6
2.64409e-24	0.396447	0.33	0.189	4.64196e-20	CD8+ T-1	Ass1
2.9855e-24	0.338333	0.386	0.253	5.24135e-20	CD8+ T-1	Gpr132
3.47999e-24	0.515423	0.365	0.222	6.10946e-20	CD8+ T-1	Usp18
1.06303e-23	0.309138	0.635	0.62	1.86625e-19	CD8+ T-1	Idnk
1.38888e-23	0.273643	0.786	0.771	2.43831e-19	CD8+ T-1	Dock2
1.90682e-23	0.339827	0.647	0.648	3.34762e-19	CD8+ T-1	Grap
2.01699e-23	0.468098	0.458	0.341	3.54103e-19	CD8+ T-1	Ifi214
5.23557e-23	0.365104	0.464	0.355	9.19156e-19	CD8+ T-1	Ddx58
5.97952e-23	0.204424	0.963	0.889	1.04976e-18	CD8+ T-1	Pfdn5
7.51093e-23	0.387761	0.514	0.438	1.31862e-18	CD8+ T-1	Dtx3l
7.63815e-23	0.180409	0.989	0.956	1.34095e-18	CD8+ T-1	Rpl17
1.01658e-22	0.2194	0.222	0.099	1.78471e-18	CD8+ T-1	Pik3r5
1.34128e-22	0.177941	0.994	0.969	2.35475e-18	CD8+ T-1	Rpl18a
1.71655e-22	0.400334	0.415	0.269	3.01357e-18	CD8+ T-1	Ighm
1.93892e-22	0.286268	0.182	0.069	3.40396e-18	CD8+ T-1	Cmpk2
2.36437e-22	0.315297	0.683	0.687	4.15089e-18	CD8+ T-1	Gimap9
3.02665e-22	0.258051	0.875	0.862	5.31358e-18	CD8+ T-1	Jak1
3.08262e-22	0.168404	0.994	0.978	5.41185e-18	CD8+ T-1	Rpl30
4.59531e-22	0.126131	0.99	0.98	8.06753e-18	CD8+ T-1	H2-Q7
6.23203e-22	0.231371	0.968	0.95	1.09409e-17	CD8+ T-1	Btg1
1.54988e-21	0.182706	0.127	0.036	2.72098e-17	CD8+ T-1	Art2b
2.21045e-21	0.454719	0.673	0.666	3.88066e-17	CD8+ T-1	Pmepa1
2.4736e-21	0.789826	0.207	0.084	4.34266e-17	CD8+ T-1	Gzma
5.73394e-21	0.361625	0.453	0.37	1.00665e-16	CD8+ T-1	Tnfaip8l2
6.25702e-21	0.507685	0.629	0.603	1.09848e-16	CD8+ T-1	Socs1
6.96834e-21	0.38799	0.55	0.487	1.22336e-16	CD8+ T-1	Gtf2i
9.58738e-21	0.209272	0.853	0.859	1.68316e-16	CD8+ T-1	Arhgef1
9.717e-21	0.319814	0.715	0.739	1.70592e-16	CD8+ T-1	Bin2
1.0188e-20	0.228067	0.858	0.868	1.7886e-16	CD8+ T-1	Ankrd11
1.35495e-20	0.462423	0.428	0.344	2.37874e-16	CD8+ T-1	Daxx
1.36754e-20	0.420783	0.462	0.361	2.40086e-16	CD8+ T-1	Slfn8
1.48669e-20	0.299926	0.447	0.356	2.61002e-16	CD8+ T-1	Thap3
1.69187e-20	0.28234	0.762	0.764	2.97025e-16	CD8+ T-1	Tbc1d10c
2.04916e-20	0.295587	0.714	0.728	3.5975e-16	CD8+ T-1	Itk
3.45878e-20	0.259264	0.652	0.618	6.07224e-16	CD8+ T-1	Tnrc6b
5.0061e-20	0.310909	0.577	0.532	8.78871e-16	CD8+ T-1	Ier5
6.82074e-20	0.225292	0.974	0.938	1.19745e-15	CD8+ T-1	Psmb8
6.89903e-20	0.170197	0.99	0.959	1.21119e-15	CD8+ T-1	Rps3
1.04665e-19	0.18756	0.989	0.966	1.8375e-15	CD8+ T-1	Rpl37a
1.25188e-19	0.262732	0.631	0.621	2.1978e-15	CD8+ T-1	Arhgap15
1.6803e-19	0.244996	0.98	0.938	2.94994e-15	CD8+ T-1	Rpl12
1.70333e-19	0.257719	0.986	0.964	2.99037e-15	CD8+ T-1	Fth1
2.08708e-19	0.199732	0.735	0.727	3.66409e-15	CD8+ T-1	Ctss
3.13991e-19	0.204886	0.988	0.976	5.51242e-15	CD8+ T-1	Rps21
4.53011e-19	0.217668	0.936	0.882	7.95307e-15	CD8+ T-1	Myl12b
6.02496e-19	0.35378	0.623	0.627	1.05774e-14	CD8+ T-1	Ifi35
9.15907e-19	0.343131	0.699	0.703	1.60797e-14	CD8+ T-1	Smchd1
1.05018e-18	0.241923	0.979	0.935	1.84369e-14	CD8+ T-1	Trbc2
1.12869e-18	0.184051	0.979	0.947	1.98154e-14	CD8+ T-1	Rpl36
1.20067e-18	0.414677	0.583	0.56	2.10789e-14	CD8+ T-1	Xaf1
1.65123e-18	0.286712	0.287	0.175	2.89889e-14	CD8+ T-1	Pdlim1
3.42994e-18	0.306996	0.479	0.424	6.0216e-14	CD8+ T-1	Abhd8
4.87505e-18	0.285984	0.322	0.212	8.55863e-14	CD8+ T-1	Foxo1
5.11016e-18	0.244351	0.754	0.78	8.97141e-14	CD8+ T-1	Tmem234
1.01614e-17	0.271633	0.955	0.895	1.78394e-13	CD8+ T-1	S100a10
1.29735e-17	0.372905	0.292	0.182	2.27763e-13	CD8+ T-1	Ifih1
1.57044e-17	0.132986	0.135	0.049	2.75707e-13	CD8+ T-1	Galnt10
1.60722e-17	0.415933	0.631	0.607	2.82163e-13	CD8+ T-1	Trim30a
1.95175e-17	0.154382	0.126	0.043	3.42648e-13	CD8+ T-1	Smad3
2.07825e-17	0.244328	0.738	0.759	3.64857e-13	CD8+ T-1	Rab8a
2.37364e-17	0.46859	0.329	0.222	4.16717e-13	CD8+ T-1	Mxd1
2.92093e-17	0.331103	0.517	0.461	5.12798e-13	CD8+ T-1	Irf9
3.31687e-17	0.114576	0.944	0.947	5.82309e-13	CD8+ T-1	H2-T23
4.6598e-17	0.306428	0.436	0.355	8.18075e-13	CD8+ T-1	Rcsd1
6.35798e-17	0.236648	0.218	0.114	1.11621e-12	CD8+ T-1	Arl5c
6.94996e-17	0.294414	0.332	0.224	1.22013e-12	CD8+ T-1	Camk2d
7.43892e-17	0.174194	0.942	0.915	1.30598e-12	CD8+ T-1	Ube2d3
8.08871e-17	0.30577	0.536	0.493	1.42005e-12	CD8+ T-1	Klk8
8.49695e-17	0.231253	0.25	0.143	1.49172e-12	CD8+ T-1	Tcp11l2
8.59679e-17	0.123336	0.119	0.039	1.50925e-12	CD8+ T-1	AW011738
8.69189e-17	0.169753	0.124	0.043	1.52595e-12	CD8+ T-1	Oasl1
9.10679e-17	0.200093	0.189	0.09	1.59879e-12	CD8+ T-1	Mylip
9.65205e-17	0.228302	0.802	0.794	1.69451e-12	CD8+ T-1	Pnrc1
1.02384e-16	0.252816	0.689	0.714	1.79745e-12	CD8+ T-1	Mrpl30
1.26016e-16	0.418418	0.438	0.367	2.21233e-12	CD8+ T-1	Gbp9
1.42767e-16	0.243595	0.215	0.113	2.50643e-12	CD8+ T-1	Gm37387
1.46e-16	0.155315	0.962	0.949	2.56317e-12	CD8+ T-1	Rbm39
1.67759e-16	0.26773	0.571	0.556	2.94518e-12	CD8+ T-1	Cdc42se1
1.81785e-16	0.15464	0.809	0.841	3.19142e-12	CD8+ T-1	Cd37
2.54888e-16	0.222823	0.228	0.125	4.47482e-12	CD8+ T-1	BC147527
2.57193e-16	0.279032	0.337	0.235	4.51527e-12	CD8+ T-1	Psme2b
2.62376e-16	0.259001	0.619	0.622	4.60627e-12	CD8+ T-1	Sash3
2.94305e-16	0.218811	0.194	0.096	5.16681e-12	CD8+ T-1	Scml4
3.24331e-16	0.235762	0.248	0.143	5.69395e-12	CD8+ T-1	Sidt1
3.70027e-16	0.31242	0.584	0.571	6.49619e-12	CD8+ T-1	Smpdl3a
5.15266e-16	0.223869	0.873	0.858	9.04601e-12	CD8+ T-1	2021-09-01
6.00677e-16	0.166843	0.886	0.884	1.05455e-11	CD8+ T-1	Tmem50a
6.188e-16	0.40457	0.256	0.151	1.08637e-11	CD8+ T-1	Mx1
9.8179e-16	0.331776	0.564	0.538	1.72363e-11	CD8+ T-1	Trim12c
1.06174e-15	0.1796	0.139	0.055	1.86399e-11	CD8+ T-1	Actn2
1.71829e-15	0.205739	0.157	0.069	3.01664e-11	CD8+ T-1	Parp12
1.75516e-15	0.251888	0.489	0.438	3.08136e-11	CD8+ T-1	Il10rb
2.48688e-15	0.216641	0.771	0.782	4.36597e-11	CD8+ T-1	Vps28
2.57663e-15	0.214885	0.717	0.741	4.52353e-11	CD8+ T-1	Syf2
2.66635e-15	0.347668	0.59	0.574	4.68105e-11	CD8+ T-1	2810474O19Rik
2.67042e-15	0.285051	0.686	0.72	4.68819e-11	CD8+ T-1	Atp1b3
2.91404e-15	0.246571	0.722	0.741	5.11589e-11	CD8+ T-1	Cd247
3.31293e-15	0.316204	0.463	0.416	5.81618e-11	CD8+ T-1	Stk38
3.43601e-15	0.220835	0.673	0.674	6.03226e-11	CD8+ T-1	Cnot6l
3.68971e-15	0.15799	0.21	0.111	6.47766e-11	CD8+ T-1	Ssbp2
3.75033e-15	0.265865	0.594	0.606	6.58407e-11	CD8+ T-1	Rnf114
6.2175e-15	0.217802	0.827	0.791	1.09154e-10	CD8+ T-1	Emp3
7.77354e-15	0.184749	0.193	0.1	1.36472e-10	CD8+ T-1	Fam241a
8.33997e-15	0.30707	0.72	0.762	1.46417e-10	CD8+ T-1	Gimap7
1.02751e-14	0.237767	0.938	0.898	1.8039e-10	CD8+ T-1	Crip1
1.07356e-14	0.429777	0.438	0.391	1.88475e-10	CD8+ T-1	Trafd1
1.34098e-14	0.211567	0.931	0.875	2.35423e-10	CD8+ T-1	Selenow
1.34999e-14	0.193517	0.252	0.151	2.37005e-10	CD8+ T-1	Trp53inp1
1.46518e-14	0.215363	0.757	0.783	2.57228e-10	CD8+ T-1	Gabarapl2
1.53616e-14	0.204507	0.391	0.297	2.69689e-10	CD8+ T-1	Fam53b
2.20674e-14	0.350216	0.559	0.532	3.87416e-10	CD8+ T-1	Parp14
2.68037e-14	0.28933	0.551	0.53	4.70566e-10	CD8+ T-1	Fam102a
2.83944e-14	0.162044	0.156	0.072	4.98493e-10	CD8+ T-1	Bicdl1
3.25665e-14	0.190714	0.972	0.944	5.71737e-10	CD8+ T-1	Ftl1
3.37033e-14	0.3166	0.481	0.453	5.91695e-10	CD8+ T-1	Lgals9
4.01022e-14	0.203126	0.911	0.886	7.04034e-10	CD8+ T-1	Gimap1
4.33694e-14	0.229947	0.918	0.873	7.61392e-10	CD8+ T-1	Lsp1
5.35838e-14	0.27016	0.725	0.763	9.40718e-10	CD8+ T-1	Gimap5
6.18378e-14	0.168415	0.991	0.959	1.08563e-09	CD8+ T-1	Rpl21
7.59466e-14	0.413491	0.566	0.57	1.33332e-09	CD8+ T-1	Gbp4
7.63474e-14	0.192616	0.814	0.837	1.34035e-09	CD8+ T-1	Celf2
7.99238e-14	0.264341	0.382	0.31	1.40314e-09	CD8+ T-1	Cyth1
8.46929e-14	0.226275	0.853	0.817	1.48687e-09	CD8+ T-1	Gmfg
8.5887e-14	0.313842	0.568	0.591	1.50783e-09	CD8+ T-1	Nmi
8.58935e-14	0.239648	0.686	0.726	1.50795e-09	CD8+ T-1	Elf1
9.7866e-14	0.199708	0.783	0.794	1.71814e-09	CD8+ T-1	Cytip
9.83527e-14	0.222427	0.647	0.66	1.72668e-09	CD8+ T-1	4930523C07Rik
1.67592e-13	0.24866	0.229	0.139	2.94224e-09	CD8+ T-1	Ehd3
3.34185e-13	0.158641	0.939	0.915	5.86696e-09	CD8+ T-1	Tspo
3.4317e-13	0.339792	0.292	0.188	6.02469e-09	CD8+ T-1	Ccr2
4.12321e-13	0.217617	0.239	0.149	7.23871e-09	CD8+ T-1	Gm30054
4.15363e-13	0.286447	0.541	0.546	7.29212e-09	CD8+ T-1	Glipr2
4.73099e-13	0.252479	0.405	0.316	8.30573e-09	CD8+ T-1	Slamf7
5.35023e-13	0.211629	0.587	0.609	9.39286e-09	CD8+ T-1	Pkn1
5.353e-13	0.194594	0.825	0.853	9.39772e-09	CD8+ T-1	Srsf5
5.97293e-13	0.200668	0.655	0.665	1.04861e-08	CD8+ T-1	Smad7
6.11833e-13	0.272233	0.412	0.354	1.07413e-08	CD8+ T-1	Cdc42ep3
7.49007e-13	0.226297	0.358	0.278	1.31496e-08	CD8+ T-1	Gm12216
1.62011e-12	0.221033	0.475	0.445	2.84427e-08	CD8+ T-1	AI467606
1.69432e-12	0.131134	0.988	0.97	2.97455e-08	CD8+ T-1	H3f3b
2.1131e-12	0.199445	0.752	0.786	3.70975e-08	CD8+ T-1	Peli1
2.38562e-12	0.248959	0.521	0.512	4.1882e-08	CD8+ T-1	Tnrc6c
2.77918e-12	0.244455	0.197	0.113	4.87912e-08	CD8+ T-1	Selenop
2.98495e-12	0.263884	0.552	0.552	5.24038e-08	CD8+ T-1	Cdkn1b
3.38079e-12	0.278027	0.2	0.108	5.93532e-08	CD8+ T-1	Maf
3.45208e-12	0.173439	0.682	0.701	6.06046e-08	CD8+ T-1	Clk1
3.49843e-12	0.274745	0.514	0.517	6.14185e-08	CD8+ T-1	Il16
4.3282e-12	0.201545	0.283	0.195	7.59858e-08	CD8+ T-1	Ptpre
4.95789e-12	0.131468	0.163	0.081	8.70407e-08	CD8+ T-1	Cxcr4
5.066e-12	0.171247	0.709	0.745	8.89388e-08	CD8+ T-1	Tmem59
5.79994e-12	0.156634	0.874	0.829	1.01824e-07	CD8+ T-1	Ndufa4
5.87138e-12	0.29292	0.343	0.277	1.03078e-07	CD8+ T-1	Rcbtb2
7.19994e-12	0.247524	0.526	0.533	1.26402e-07	CD8+ T-1	Twf2
7.26135e-12	0.204515	0.887	0.869	1.2748e-07	CD8+ T-1	Cnn2
7.7466e-12	0.404156	0.463	0.428	1.35999e-07	CD8+ T-1	Herc6
1.04045e-11	0.122772	0.108	0.043	1.82662e-07	CD8+ T-1	Gpr55
1.13194e-11	0.2286	0.605	0.631	1.98723e-07	CD8+ T-1	Ppdpf
1.15644e-11	0.158628	0.989	0.951	2.03025e-07	CD8+ T-1	Coro1a
1.1687e-11	0.222705	0.645	0.684	2.05177e-07	CD8+ T-1	Irf2
1.27833e-11	0.181014	0.199	0.116	2.24423e-07	CD8+ T-1	Lpar6
1.74154e-11	0.173594	0.817	0.847	3.05745e-07	CD8+ T-1	Leprotl1
1.78513e-11	0.197567	0.79	0.796	3.13397e-07	CD8+ T-1	Bcl2
1.90928e-11	0.232655	0.575	0.599	3.35192e-07	CD8+ T-1	Stk4
1.95322e-11	0.211793	0.871	0.857	3.42907e-07	CD8+ T-1	Rap1b
2.05793e-11	0.184889	0.113	0.047	3.61289e-07	CD8+ T-1	Trat1
2.07136e-11	0.161677	0.769	0.808	3.63647e-07	CD8+ T-1	Rhoh
2.10411e-11	0.220672	0.703	0.759	3.69397e-07	CD8+ T-1	Mettl23
2.59068e-11	0.123903	0.985	0.955	4.54821e-07	CD8+ T-1	Laptm5
3.4568e-11	0.150681	0.671	0.672	6.06876e-07	CD8+ T-1	Klf6
4.82163e-11	0.164224	0.203	0.12	8.46484e-07	CD8+ T-1	Samd3
4.93352e-11	0.136958	0.994	0.96	8.66129e-07	CD8+ T-1	Rps9
5.01993e-11	0.295976	0.512	0.496	8.813e-07	CD8+ T-1	Rnf213
6.11976e-11	0.203162	0.818	0.838	1.07439e-06	CD8+ T-1	Chmp4b
7.42529e-11	0.204647	0.672	0.724	1.30358e-06	CD8+ T-1	Zdhhc18
8.02336e-11	0.432772	0.359	0.3	1.40858e-06	CD8+ T-1	Satb1
9.34763e-11	0.230992	0.557	0.554	1.64107e-06	CD8+ T-1	Atf7ip
9.50755e-11	0.326541	0.439	0.424	1.66915e-06	CD8+ T-1	Sp140
1.03645e-10	0.263124	0.465	0.443	1.8196e-06	CD8+ T-1	Gna13
1.08836e-10	0.227764	0.683	0.714	1.91072e-06	CD8+ T-1	Itga4
1.36093e-10	0.427615	0.634	0.679	2.38925e-06	CD8+ T-1	Phf11b
1.3619e-10	0.205876	0.636	0.681	2.39094e-06	CD8+ T-1	Sys1
1.36475e-10	0.479406	0.48	0.445	2.39596e-06	CD8+ T-1	Gzmk
1.81905e-10	0.339449	0.38	0.342	3.19353e-06	CD8+ T-1	1600014C10Rik
1.86965e-10	0.222434	0.498	0.481	3.28235e-06	CD8+ T-1	Pde7a
1.88498e-10	0.263623	0.368	0.315	3.30927e-06	CD8+ T-1	Crebrf
1.89463e-10	0.193601	0.246	0.17	3.32621e-06	CD8+ T-1	Bcl9l
1.92906e-10	0.14994	0.881	0.868	3.38665e-06	CD8+ T-1	Gabarap
2.60036e-10	0.158704	0.849	0.834	4.56519e-06	CD8+ T-1	Gpx4
3.43735e-10	0.204669	0.449	0.418	6.03462e-06	CD8+ T-1	Ifnar1
3.95527e-10	0.145707	0.978	0.949	6.94386e-06	CD8+ T-1	Ddx5
4.53953e-10	0.259872	0.436	0.427	7.9696e-06	CD8+ T-1	Commd8
4.69491e-10	0.29596	0.719	0.745	8.24239e-06	CD8+ T-1	Junb
4.82426e-10	0.269342	0.303	0.24	8.46947e-06	CD8+ T-1	Sit1
5.26599e-10	0.172346	0.189	0.115	9.24497e-06	CD8+ T-1	Pecam1
5.61687e-10	0.225548	0.569	0.57	9.86098e-06	CD8+ T-1	Ubald2
6.22174e-10	0.221274	0.256	0.184	1.09229e-05	CD8+ T-1	Asap1
6.49627e-10	0.188819	0.635	0.663	1.14049e-05	CD8+ T-1	Ddx6
6.53126e-10	0.115126	0.131	0.065	1.14663e-05	CD8+ T-1	Crim1
7.31402e-10	0.123234	0.101	0.044	1.28405e-05	CD8+ T-1	Dusp7
7.80051e-10	0.25606	0.389	0.339	1.36946e-05	CD8+ T-1	Sesn3
8.2198e-10	0.196812	0.705	0.746	1.44307e-05	CD8+ T-1	Arhgap9
1.06237e-09	0.270176	0.606	0.673	1.86509e-05	CD8+ T-1	Crlf3
1.28146e-09	0.212839	0.184	0.115	2.24974e-05	CD8+ T-1	Irgm2
1.50443e-09	0.194667	0.77	0.811	2.64118e-05	CD8+ T-1	Nop53
1.50474e-09	0.156361	0.677	0.722	2.64173e-05	CD8+ T-1	Bptf
1.70523e-09	0.17033	0.226	0.152	2.99371e-05	CD8+ T-1	Pag1
2.09979e-09	0.129983	0.984	0.948	3.68639e-05	CD8+ T-1	Rpl38
2.27601e-09	0.146945	0.983	0.955	3.99576e-05	CD8+ T-1	Rps4x
2.43479e-09	0.215517	0.571	0.607	4.27452e-05	CD8+ T-1	Fam32a
2.73378e-09	0.321407	0.246	0.179	4.79943e-05	CD8+ T-1	Ifit2
2.88337e-09	0.207935	0.376	0.333	5.06205e-05	CD8+ T-1	Prkd2
3.00448e-09	0.251041	0.473	0.474	5.27467e-05	CD8+ T-1	Frmd8
3.90112e-09	0.221491	0.51	0.493	6.8488e-05	CD8+ T-1	Gpr171
4.3884e-09	0.244581	0.554	0.559	7.70428e-05	CD8+ T-1	Samd9l
4.63091e-09	0.148749	0.736	0.787	8.13003e-05	CD8+ T-1	Arl6ip5
4.85279e-09	0.172578	0.696	0.746	8.51957e-05	CD8+ T-1	Rnf187
5.58847e-09	0.210853	0.318	0.26	9.81112e-05	CD8+ T-1	AB124611
5.7014e-09	0.193949	0.667	0.722	0.000100094	CD8+ T-1	Xrn2
6.09917e-09	0.169317	0.192	0.124	0.000107077	CD8+ T-1	Erich1
6.28045e-09	0.152436	0.991	0.959	0.00011026	CD8+ T-1	Rpl8
7.59167e-09	0.119481	0.683	0.715	0.000133279	CD8+ T-1	Ankrd44
7.77159e-09	0.185211	0.296	0.231	0.000136438	CD8+ T-1	Mgst2
8.87595e-09	0.251335	0.345	0.301	0.000155826	CD8+ T-1	Rnf125
8.9883e-09	0.176405	0.62	0.653	0.000157799	CD8+ T-1	Grk6
9.69328e-09	0.126485	0.984	0.938	0.000170175	CD8+ T-1	Rpl29
1.07e-08	0.182866	0.297	0.235	0.00018785	CD8+ T-1	Il17ra
1.1445e-08	0.274379	0.38	0.358	0.000200929	CD8+ T-1	Ccm2
1.25882e-08	0.144448	0.986	0.953	0.000220998	CD8+ T-1	Rps5
1.33829e-08	0.251919	0.29	0.23	0.000234951	CD8+ T-1	Oas1a
1.48212e-08	0.160522	0.818	0.828	0.000260202	CD8+ T-1	Ndufa6
1.58672e-08	0.207632	0.53	0.539	0.000278565	CD8+ T-1	Stat4
1.65665e-08	0.225877	0.485	0.509	0.000290842	CD8+ T-1	Arl2bp
1.70177e-08	0.204554	0.434	0.384	0.000298763	CD8+ T-1	Gpr183
2.29699e-08	0.158992	0.229	0.158	0.00040326	CD8+ T-1	Runx1
2.6334e-08	0.321214	0.448	0.453	0.00046232	CD8+ T-1	Parp9
2.88772e-08	0.203322	0.459	0.449	0.000506967	CD8+ T-1	Cd84
3.24004e-08	0.18771	0.752	0.824	0.000568821	CD8+ T-1	Tapbp
4.14124e-08	0.189278	0.399	0.37	0.000727035	CD8+ T-1	S1pr4
4.96599e-08	0.195001	0.449	0.417	0.000871829	CD8+ T-1	Mxd4
5.13399e-08	0.225032	0.41	0.395	0.000901323	CD8+ T-1	Fam78a
5.29177e-08	0.205833	0.609	0.657	0.000929024	CD8+ T-1	Mknk2
7.1796e-08	0.169217	0.661	0.713	0.00126045	CD8+ T-1	2021-09-06
7.63462e-08	0.252897	0.312	0.266	0.00134033	CD8+ T-1	Parp10
7.68633e-08	0.288427	0.516	0.552	0.00134941	CD8+ T-1	Arid4b
9.3338e-08	0.319485	0.564	0.576	0.00163864	CD8+ T-1	Pim1
9.64846e-08	0.188773	0.29	0.232	0.00169388	CD8+ T-1	Clec2i
1.01732e-07	0.211318	0.541	0.584	0.00178601	CD8+ T-1	Ppp2r5a
1.02936e-07	0.250031	0.304	0.26	0.00180714	CD8+ T-1	Uba7
1.03749e-07	0.128372	0.593	0.618	0.00182142	CD8+ T-1	Vsir
1.09967e-07	0.282564	0.3	0.233	0.00193059	CD8+ T-1	Ms4a4c
1.14319e-07	0.282122	0.687	0.75	0.00200699	CD8+ T-1	Itgb1
1.34457e-07	0.117377	0.879	0.892	0.00236053	CD8+ T-1	Rsrp1
1.46683e-07	0.219582	0.447	0.447	0.00257517	CD8+ T-1	Snx20
2.29699e-07	0.134785	0.146	0.09	0.00403259	CD8+ T-1	Gm20069
2.39553e-07	0.188724	0.693	0.74	0.00420559	CD8+ T-1	Fyn
2.58402e-07	0.22316	0.324	0.286	0.00453651	CD8+ T-1	Arhgap25
2.81967e-07	0.167783	0.941	0.91	0.00495021	CD8+ T-1	Cotl1
2.99428e-07	0.2326	0.458	0.461	0.00525676	CD8+ T-1	Etnk1
3.15797e-07	0.223276	0.325	0.29	0.00554413	CD8+ T-1	Rassf2
3.24655e-07	0.228383	0.568	0.619	0.00569964	CD8+ T-1	Usp25
3.33393e-07	0.203801	0.48	0.497	0.00585305	CD8+ T-1	Nfatc3
3.38212e-07	0.2068	0.52	0.515	0.00593766	CD8+ T-1	Cd5
3.43238e-07	0.194905	0.5	0.528	0.00602589	CD8+ T-1	Rnf167
3.75326e-07	0.129066	0.916	0.883	0.00658922	CD8+ T-1	Psme2
3.95808e-07	0.285842	0.434	0.437	0.00694881	CD8+ T-1	Zufsp
3.96397e-07	0.111428	0.965	0.899	0.00695915	CD8+ T-1	Eif3f
5.04433e-07	0.145308	0.791	0.82	0.00885583	CD8+ T-1	Map1lc3b
5.05059e-07	0.100687	0.12	0.067	0.00886682	CD8+ T-1	P2rx4
5.41059e-07	0.187329	0.624	0.703	0.00949884	CD8+ T-1	Tprgl
5.47204e-07	0.227253	0.434	0.434	0.00960671	CD8+ T-1	Znrf1
5.76229e-07	0.121005	0.991	0.959	0.0101163	CD8+ T-1	Rps27a
5.96793e-07	0.224776	0.272	0.223	0.0104773	CD8+ T-1	Dhx58
6.28737e-07	0.231035	0.517	0.552	0.0110381	CD8+ T-1	Fryl
6.36209e-07	0.130589	0.838	0.873	0.0111693	CD8+ T-1	Prrc2c
6.40124e-07	0.218512	0.368	0.34	0.011238	CD8+ T-1	Trim56
7.39411e-07	0.276859	0.291	0.242	0.0129811	CD8+ T-1	Stat2
9.48835e-07	0.136654	0.17	0.113	0.0166577	CD8+ T-1	Baiap3
9.9749e-07	0.160202	0.696	0.737	0.0175119	CD8+ T-1	Eif4a2
1.02113e-06	0.137022	0.697	0.748	0.017927	CD8+ T-1	Scp2
1.08235e-06	0.138524	0.126	0.076	0.0190017	CD8+ T-1	A430078G23Rik
1.13867e-06	0.11506	0.917	0.914	0.0199906	CD8+ T-1	Ltb
1.24858e-06	0.190265	0.306	0.269	0.0219201	CD8+ T-1	Elk4
1.26524e-06	0.225065	0.415	0.408	0.0222126	CD8+ T-1	Flt3l
1.43783e-06	0.163707	0.538	0.562	0.0252425	CD8+ T-1	Utrn
1.47217e-06	0.185139	0.614	0.676	0.0258453	CD8+ T-1	Nipbl
1.551e-06	0.131667	0.873	0.861	0.0272293	CD8+ T-1	H2afy
1.56965e-06	0.104695	0.967	0.93	0.0275568	CD8+ T-1	Pabpc1
1.67072e-06	0.190943	0.25	0.204	0.0293312	CD8+ T-1	Trim21
1.80347e-06	0.144019	0.598	0.642	0.0316617	CD8+ T-1	Rassf5
2.13522e-06	0.474734	0.593	0.68	0.037486	CD8+ T-1	Isg20
2.13709e-06	0.168533	0.546	0.576	0.0375188	CD8+ T-1	Prex1
2.18952e-06	0.115217	0.96	0.9	0.0384393	CD8+ T-1	Rpl13a
2.20358e-06	0.216217	0.314	0.285	0.0386861	CD8+ T-1	Mbp
2.22882e-06	0.170786	0.204	0.15	0.0391291	CD8+ T-1	Dyrk2
2.26186e-06	0.131518	0.108	0.062	0.0397092	CD8+ T-1	Gab3
2.42772e-06	0.217649	0.377	0.376	0.0426211	CD8+ T-1	Phc2
2.54457e-06	0.12355	0.141	0.09	0.0446725	CD8+ T-1	Card6
2.66501e-06	0.166633	0.271	0.221	0.0467868	CD8+ T-1	Ddit3
2.83391e-06	0.216763	0.36	0.349	0.0497521	CD8+ T-1	Armc7
3.02455e-06	0.194809	0.351	0.332	0.053099	CD8+ T-1	Vrk3
3.12599e-06	0.156874	0.225	0.177	0.0548799	CD8+ T-1	Cbr1
3.38724e-06	0.133824	0.152	0.102	0.0594664	CD8+ T-1	Icam2
3.4208e-06	0.137855	0.687	0.743	0.0600555	CD8+ T-1	Dazap2
3.73037e-06	0.225896	0.323	0.289	0.0654904	CD8+ T-1	St8sia4
4.09396e-06	0.137226	0.646	0.707	0.0718736	CD8+ T-1	Rasal3
4.10375e-06	0.272885	0.458	0.486	0.0720454	CD8+ T-1	Mitd1
4.2235e-06	0.189056	0.465	0.482	0.0741478	CD8+ T-1	Ubac2
4.22792e-06	0.156668	0.588	0.626	0.0742253	CD8+ T-1	Zfp292
4.81991e-06	0.114484	0.785	0.825	0.0846184	CD8+ T-1	Tsc22d4
4.98373e-06	0.163057	0.533	0.6	0.0874944	CD8+ T-1	Cdc42se2
5.23354e-06	0.266332	0.449	0.474	0.09188	CD8+ T-1	Irf2bpl
5.42363e-06	0.179035	0.333	0.307	0.0952172	CD8+ T-1	Sh2d3c
5.55172e-06	0.206652	0.277	0.239	0.097466	CD8+ T-1	Pink1
5.67879e-06	0.209263	0.251	0.209	0.0996968	CD8+ T-1	Ifitm10
5.84639e-06	0.204104	0.53	0.591	0.102639	CD8+ T-1	Ogfr
6.01916e-06	0.202617	0.441	0.466	0.105672	CD8+ T-1	Stk10
6.28704e-06	0.156291	0.713	0.773	0.110375	CD8+ T-1	Ube2b
6.82624e-06	0.204128	0.446	0.469	0.119842	CD8+ T-1	Celf1
6.90491e-06	0.11379	0.123	0.074	0.121223	CD8+ T-1	Itgax
7.03517e-06	0.20334	0.575	0.639	0.12351	CD8+ T-1	Smap1
7.74001e-06	0.10965	0.98	0.948	0.135884	CD8+ T-1	Rps23
8.79544e-06	0.193471	0.313	0.282	0.154413	CD8+ T-1	Trim34a
1.0925e-05	0.204733	0.677	0.758	0.1918	CD8+ T-1	Pycard
1.12875e-05	0.131473	0.141	0.094	0.198164	CD8+ T-1	Acss2
1.13973e-05	0.145684	0.179	0.132	0.200091	CD8+ T-1	Amz2
1.14314e-05	0.182007	0.361	0.344	0.20069	CD8+ T-1	Madd
1.29275e-05	0.102914	0.991	0.978	0.226955	CD8+ T-1	Rpl23
1.43026e-05	0.210528	0.302	0.257	0.251097	CD8+ T-1	Rora
1.44485e-05	0.214121	0.488	0.525	0.253658	CD8+ T-1	Pitpnc1
1.56115e-05	0.103776	0.795	0.844	0.274076	CD8+ T-1	Ncor1
1.56242e-05	0.195534	0.292	0.258	0.274299	CD8+ T-1	Retreg1
1.56763e-05	0.218944	0.601	0.686	0.275213	CD8+ T-1	Lpxn
1.60736e-05	0.188521	0.322	0.308	0.282187	CD8+ T-1	Pgs1
1.98675e-05	0.143795	0.705	0.777	0.348793	CD8+ T-1	Ddx24
2.06331e-05	0.223211	0.432	0.439	0.362236	CD8+ T-1	Txk
2.15615e-05	0.13866	0.494	0.527	0.378534	CD8+ T-1	Fam105a
2.2909e-05	0.157843	0.199	0.155	0.40219	CD8+ T-1	Pde4b
2.3407e-05	0.164719	0.183	0.138	0.410933	CD8+ T-1	Arhgef18
2.38002e-05	0.163381	0.421	0.414	0.417837	CD8+ T-1	Cdkn2d
2.41604e-05	0.167225	0.615	0.691	0.42416	CD8+ T-1	Srpk1
2.59524e-05	0.253404	0.428	0.442	0.45562	CD8+ T-1	Nr3c1
2.64636e-05	0.141923	0.578	0.646	0.464595	CD8+ T-1	Mat2b
2.99159e-05	0.191396	0.239	0.203	0.525203	CD8+ T-1	Mov10
3.25714e-05	0.146865	0.767	0.828	0.571824	CD8+ T-1	Ptp4a2
3.26672e-05	0.117924	0.7	0.748	0.573505	CD8+ T-1	Ywhab
3.40564e-05	0.188487	0.546	0.614	0.597894	CD8+ T-1	Clint1
3.40996e-05	0.168037	0.276	0.24	0.598653	CD8+ T-1	Phf1
3.46144e-05	0.138926	0.202	0.156	0.60769	CD8+ T-1	Abcb1a
3.75181e-05	0.154391	0.282	0.25	0.658668	CD8+ T-1	Fchsd2
3.77197e-05	0.186611	0.427	0.445	0.662207	CD8+ T-1	Ube2h
4.28135e-05	0.161957	0.293	0.261	0.751634	CD8+ T-1	Sntb2
4.5278e-05	0.189263	0.329	0.308	0.794901	CD8+ T-1	Itpr2
4.69389e-05	0.184811	0.488	0.527	0.824059	CD8+ T-1	Cirbp
5.99404e-05	0.138936	0.417	0.431	1	CD8+ T-1	Jakmip1
6.5454e-05	0.1356	0.356	0.339	1	CD8+ T-1	Tle3
6.67383e-05	0.107193	0.108	0.068	1	CD8+ T-1	Plxnc1
6.88097e-05	0.129929	0.777	0.813	1	CD8+ T-1	D8Ertd738e
6.96014e-05	0.124044	0.806	0.797	1	CD8+ T-1	Tagln2
7.12885e-05	0.154605	0.462	0.483	1	CD8+ T-1	Hsd11b1
7.24485e-05	0.23568	0.416	0.438	1	CD8+ T-1	Nek7
7.67389e-05	0.122087	0.165	0.121	1	CD8+ T-1	Slc9a9
7.70053e-05	0.256772	0.302	0.281	1	CD8+ T-1	Tor3a
8.09134e-05	0.168456	0.281	0.249	1	CD8+ T-1	Kdm7a
8.84517e-05	0.133912	0.547	0.589	1	CD8+ T-1	Itpkb
9.19492e-05	0.141581	0.52	0.564	1	CD8+ T-1	Chd2
0.000108803	0.176144	0.416	0.445	1	CD8+ T-1	Hpcal1
0.000113791	0.536395	0.407	0.414	1	CD8+ T-1	Il7r
0.000114305	0.160516	0.46	0.492	1	CD8+ T-1	Tbc1d1
0.000128461	0.362424	0.363	0.327	1	CD8+ T-1	Gm12840
0.000130359	0.173506	0.455	0.502	1	CD8+ T-1	Ikbkb
0.000135984	0.160573	0.272	0.246	1	CD8+ T-1	Rnpepl1
0.000140313	0.210569	0.332	0.323	1	CD8+ T-1	Tmem71
0.000141061	0.201351	0.36	0.36	1	CD8+ T-1	Epb41
0.000149226	0.141727	0.156	0.116	1	CD8+ T-1	Tesc
0.000162282	0.229338	0.351	0.353	1	CD8+ T-1	Gbp8
0.000168468	0.174127	0.454	0.488	1	CD8+ T-1	Asxl2
0.000175883	0.154028	0.751	0.806	1	CD8+ T-1	Pla2g16
0.000175885	0.137405	0.163	0.123	1	CD8+ T-1	Fam49a
0.000182571	0.121201	0.14	0.099	1	CD8+ T-1	Arhgap26
0.000185396	0.150145	0.345	0.339	1	CD8+ T-1	Pglyrp2
0.000189463	0.140557	0.197	0.16	1	CD8+ T-1	Dennd2d
0.000230896	0.155951	0.631	0.724	1	CD8+ T-1	Pstpip1
0.000238701	0.147922	0.166	0.129	1	CD8+ T-1	Aaed1
0.000258658	0.169771	0.189	0.156	1	CD8+ T-1	Fam117a
0.000269226	0.186478	0.423	0.456	1	CD8+ T-1	Dok2
0.000272712	0.104625	0.172	0.133	1	CD8+ T-1	Abcg1
0.00028811	0.150649	0.5	0.553	1	CD8+ T-1	Pbxip1
0.000312933	0.102395	0.736	0.784	1	CD8+ T-1	Sumo1
0.000327474	0.15766	0.183	0.147	1	CD8+ T-1	L3mbtl3
0.000331106	0.112892	0.764	0.817	1	CD8+ T-1	Ubxn1
0.000346687	0.155827	0.245	0.217	1	CD8+ T-1	Nfatc2
0.000353406	0.150201	0.541	0.606	1	CD8+ T-1	Rbbp6
0.000358748	0.156103	0.433	0.475	1	CD8+ T-1	Trim26
0.000396216	0.107196	0.111	0.076	1	CD8+ T-1	Arhgap5
0.000419609	0.10792	0.653	0.74	1	CD8+ T-1	Pdcd10
0.000435776	0.165691	0.218	0.188	1	CD8+ T-1	Nxpe3
0.000441647	0.163026	0.496	0.569	1	CD8+ T-1	Rchy1
0.000452703	0.170364	0.339	0.322	1	CD8+ T-1	Hmgn1
0.000477053	0.175361	0.309	0.302	1	CD8+ T-1	N4bp2l1
0.000492993	0.241094	0.323	0.314	1	CD8+ T-1	Gbp6
0.000530447	0.127957	0.181	0.144	1	CD8+ T-1	Parp11
0.000593054	0.18874	0.533	0.611	1	CD8+ T-1	Casp8
0.00066587	0.139189	0.274	0.249	1	CD8+ T-1	Psen2
0.000695379	0.107311	0.136	0.101	1	CD8+ T-1	Tob1
0.000698003	0.118432	0.787	0.83	1	CD8+ T-1	S100a13
0.000721684	0.103456	0.713	0.769	1	CD8+ T-1	Pitpna
0.000723179	0.192754	0.387	0.407	1	CD8+ T-1	Fam169b
0.000741713	0.164005	0.559	0.626	1	CD8+ T-1	Arid5a
0.000793717	0.132948	0.135	0.101	1	CD8+ T-1	Il6st
0.000811603	0.189708	0.521	0.606	1	CD8+ T-1	Rhog
0.000825304	0.208611	0.269	0.247	1	CD8+ T-1	Trim30d
0.000878159	0.109644	0.983	0.955	1	CD8+ T-1	Rps7
0.000886133	0.115517	0.676	0.756	1	CD8+ T-1	Dusp11
0.000904484	0.136144	0.168	0.135	1	CD8+ T-1	Lats2
0.000906153	0.130793	0.323	0.316	1	CD8+ T-1	Tle4
0.00090803	0.262897	0.266	0.252	1	CD8+ T-1	Phf11a
0.000956887	0.104089	0.687	0.765	1	CD8+ T-1	Brk1
0.000998969	0.182692	0.213	0.187	1	CD8+ T-1	Rnf19b
0.00105712	0.179199	0.597	0.69	1	CD8+ T-1	Fnbp1
0.00108006	0.145	0.554	0.644	1	CD8+ T-1	Zdhhc20
0.00114101	0.147287	0.579	0.655	1	CD8+ T-1	Zbtb7a
0.00119602	0.161484	0.234	0.211	1	CD8+ T-1	Hsh2d
0.00127162	0.137061	0.353	0.359	1	CD8+ T-1	Tnik
0.00129117	0.163121	0.475	0.546	1	CD8+ T-1	Sirt7
0.00137086	0.193133	0.538	0.63	1	CD8+ T-1	Ttc39b
0.0014203	0.100823	0.792	0.83	1	CD8+ T-1	H2afj
0.00157079	0.154784	0.99	0.963	1	CD8+ T-1	Rps29
0.00168823	0.164184	0.418	0.458	1	CD8+ T-1	Aak1
0.00169338	0.197259	0.291	0.281	1	CD8+ T-1	Zeb1
0.0017041	0.164291	0.453	0.516	1	CD8+ T-1	Eif4ebp2
0.00182512	0.127646	0.546	0.626	1	CD8+ T-1	Cyld
0.00185038	0.160403	0.28	0.273	1	CD8+ T-1	Lgals8
0.00186799	0.178037	0.125	0.092	1	CD8+ T-1	Fos
0.00194893	0.153669	0.616	0.703	1	CD8+ T-1	Tbrg1
0.00217566	0.134189	0.166	0.137	1	CD8+ T-1	Gvin1
0.00218966	0.116892	0.113	0.083	1	CD8+ T-1	Nod1
0.00233101	0.126935	0.502	0.586	1	CD8+ T-1	Suclg1
0.00241502	0.154521	0.479	0.54	1	CD8+ T-1	Tapbpl
0.00245158	0.111301	0.161	0.131	1	CD8+ T-1	Tmem140
0.00248337	0.138441	0.261	0.247	1	CD8+ T-1	Fbxl12
0.00288458	0.315194	0.256	0.246	1	CD8+ T-1	Ube2l6
0.00296809	0.149909	0.454	0.507	1	CD8+ T-1	Nlrc5
0.00312195	0.161927	0.222	0.194	1	CD8+ T-1	Zfp36
0.00313585	0.145786	0.478	0.552	1	CD8+ T-1	Fam104a
0.00338617	0.145763	0.453	0.502	1	CD8+ T-1	Crebbp
0.00380617	0.105402	0.391	0.411	1	CD8+ T-1	Avl9
0.00385168	0.150899	0.337	0.346	1	CD8+ T-1	Heca
0.00393599	0.100793	0.631	0.713	1	CD8+ T-1	Rab2a
0.00408571	0.168093	0.33	0.345	1	CD8+ T-1	Abi3
0.00412	0.157985	0.365	0.393	1	CD8+ T-1	Tmem243
0.00426781	0.158664	0.598	0.701	1	CD8+ T-1	Med10
0.0044063	0.184713	0.447	0.517	1	CD8+ T-1	Keap1
0.00447691	0.177446	0.527	0.604	1	CD8+ T-1	Top2b
0.00451905	0.153013	0.387	0.424	1	CD8+ T-1	Esyt2
0.00458102	0.136623	0.494	0.578	1	CD8+ T-1	Ppp6r1
0.00469634	0.180591	0.222	0.196	1	CD8+ T-1	Zbtb20
0.00525131	0.171669	0.245	0.23	1	CD8+ T-1	Kif1b
0.00533048	0.128056	0.986	0.954	1	CD8+ T-1	Rps19
0.0054521	0.121232	0.277	0.267	1	CD8+ T-1	Arhgef3
0.00596228	0.16414	0.269	0.263	1	CD8+ T-1	Golm1
0.00615181	0.185432	0.455	0.526	1	CD8+ T-1	Znrf2
0.00620112	0.108028	0.157	0.131	1	CD8+ T-1	Gramd4
0.00693094	0.124394	0.135	0.11	1	CD8+ T-1	BC051226
0.00697279	0.120837	0.209	0.191	1	CD8+ T-1	Tmem131l
0.00729315	0.114192	0.234	0.217	1	CD8+ T-1	Hbp1
0.0076076	0.21096	0.387	0.431	1	CD8+ T-1	Morc3
0.00778966	0.119199	0.552	0.654	1	CD8+ T-1	Rbck1
0.0080291	0.114555	0.178	0.15	1	CD8+ T-1	Tagap
0.00804879	0.171255	0.369	0.4	1	CD8+ T-1	Inpp1
0.00835382	0.124623	0.526	0.622	1	CD8+ T-1	Atp11b
0.00871529	0.118727	0.541	0.639	1	CD8+ T-1	Traf3ip3
0.00883872	0.181025	0.507	0.589	1	CD8+ T-1	Pttg1
0.00893051	0.132045	0.333	0.342	1	CD8+ T-1	Sun2
0.00894598	0.109891	0.634	0.705	1	CD8+ T-1	Ankrd12
0.009305	0.273826	0.39	0.418	1	CD8+ T-1	Eif2ak2
0.00947506	0.149387	0.238	0.23	1	CD8+ T-1	Fam69a
0.00948639	0.139452	0.233	0.217	1	CD8+ T-1	Cd274
0.00954969	0.159105	0.222	0.207	1	CD8+ T-1	Mfsd6
0.0095578	0.143193	0.332	0.339	1	CD8+ T-1	St3gal6
0.00985329	0.168098	0.563	0.617	1	CD8+ T-1	Cd6
7.35502e-113	0.395875	0.998	0.966	1.29125e-108	CD8+ T-2	Rps15a
7.07295e-109	0.415687	0.743	0.287	1.24173e-104	CD8+ T-2	Cd244
1.0036e-105	0.610005	0.817	0.382	1.76192e-101	CD8+ T-2	AC163354.1
4.85322e-90	0.44255	0.803	0.392	8.52031e-86	CD8+ T-2	Lat2
4.21203e-88	0.312528	1	0.989	7.39463e-84	CD8+ T-2	Eef1a1
1.01816e-80	0.518771	0.952	0.683	1.78749e-76	CD8+ T-2	Ptpn6
7.11835e-74	0.321888	0.997	0.956	1.2497e-69	CD8+ T-2	Rpl3
1.54032e-73	0.390517	0.525	0.189	2.70418e-69	CD8+ T-2	1810011H11Rik
4.8675e-72	0.559158	0.984	0.767	8.54538e-68	CD8+ T-2	S100a4
4.63264e-70	0.352751	0.997	0.951	8.13307e-66	CD8+ T-2	Rpl39
2.59997e-69	0.238521	0.363	0.091	4.5645e-65	CD8+ T-2	Adora3
2.78444e-69	0.301811	0.605	0.242	4.88836e-65	CD8+ T-2	Adgrg1
3.77172e-69	0.312466	1	0.959	6.62162e-65	CD8+ T-2	Rpl32
6.00021e-69	0.327047	0.989	0.892	1.0534e-64	CD8+ T-2	Ctsd
2.11035e-65	0.282019	1	0.966	3.70494e-61	CD8+ T-2	Rps11
2.4251e-65	0.373267	0.994	0.852	4.2575e-61	CD8+ T-2	Il2rb
3.48186e-65	0.309433	0.994	0.961	6.11275e-61	CD8+ T-2	Cd3g
2.38001e-64	0.31605	0.997	0.959	4.17835e-60	CD8+ T-2	Rpl37
9.08208e-61	0.386636	0.875	0.543	1.59445e-56	CD8+ T-2	Acot7
1.852e-60	0.296725	0.997	0.931	3.25138e-56	CD8+ T-2	Rpl27
3.8357e-60	0.244802	0.998	0.984	6.73395e-56	CD8+ T-2	Rpl27a
2.96371e-59	0.285658	0.997	0.942	5.20309e-55	CD8+ T-2	Rpl7a
5.03684e-58	0.788833	0.43	0.146	8.84268e-54	CD8+ T-2	Gm156
4.61364e-56	0.431744	0.711	0.379	8.09971e-52	CD8+ T-2	Abcb9
6.76484e-53	0.242981	1	0.969	1.18764e-48	CD8+ T-2	Rpl18a
1.33909e-52	0.225873	0.998	0.968	2.3509e-48	CD8+ T-2	Rpl11
2.86696e-52	0.321833	0.997	0.974	5.03324e-48	CD8+ T-2	Cd52
6.78599e-52	0.538022	0.957	0.865	1.19135e-47	CD8+ T-2	S100a6
1.4108e-51	0.30003	0.646	0.316	2.47679e-47	CD8+ T-2	Itga1
1.71289e-51	0.276076	0.595	0.291	3.00715e-47	CD8+ T-2	Bspry
8.05161e-51	0.250147	1	0.956	1.41354e-46	CD8+ T-2	Rpl17
1.1174e-50	0.281717	0.987	0.887	1.96171e-46	CD8+ T-2	Eif3h
1.28356e-50	0.267351	0.678	0.358	2.25342e-46	CD8+ T-2	Tmem163
4.81365e-50	0.409609	0.9	0.632	8.45084e-46	CD8+ T-2	Cdk6
1.26463e-49	0.325612	0.954	0.708	2.22018e-45	CD8+ T-2	Ech1
3.10105e-49	0.349692	0.941	0.671	5.4442e-45	CD8+ T-2	Pglyrp1
3.82559e-49	0.245054	0.505	0.217	6.7162e-45	CD8+ T-2	Matk
4.93785e-49	0.309952	0.919	0.623	8.66889e-45	CD8+ T-2	Litaf
1.38778e-48	0.244482	0.997	0.945	2.43639e-44	CD8+ T-2	Rpl24
2.60103e-48	0.248155	0.998	0.953	4.56637e-44	CD8+ T-2	Rps7
1.25448e-47	0.344707	0.983	0.843	2.20236e-43	CD8+ T-2	S100a11
1.88371e-46	0.226688	0.998	0.969	3.30705e-42	CD8+ T-2	Eef2
2.28989e-46	0.275715	0.995	0.945	4.02014e-42	CD8+ T-2	Rps12
7.94259e-46	0.227317	0.995	0.958	1.3944e-41	CD8+ T-2	Rps13
8.97533e-46	0.404697	0.99	0.883	1.57571e-41	CD8+ T-2	Vim
1.49323e-45	0.248784	0.383	0.144	2.62151e-41	CD8+ T-2	2900026A02Rik
1.67695e-45	0.28626	0.984	0.796	2.94405e-41	CD8+ T-2	Cd8a
2.8908e-44	0.260752	0.727	0.428	5.07509e-40	CD8+ T-2	Padi2
3.09589e-44	0.207342	0.998	0.978	5.43514e-40	CD8+ T-2	Rpl30
5.22384e-44	0.326916	0.462	0.21	9.17097e-40	CD8+ T-2	C1qtnf6
7.42627e-44	0.426788	0.584	0.283	1.30376e-39	CD8+ T-2	Tcrg-C2
1.38113e-43	0.347446	0.986	0.873	2.4247e-39	CD8+ T-2	Hcst
1.60835e-43	0.235672	0.619	0.319	2.82362e-39	CD8+ T-2	Dgkh
2.03818e-43	0.235565	0.67	0.366	3.57822e-39	CD8+ T-2	Cd38
3.42809e-43	0.269541	0.47	0.213	6.01836e-39	CD8+ T-2	Itih5
1.0567e-42	0.259832	0.714	0.412	1.85514e-38	CD8+ T-2	Gpd2
5.78569e-42	0.255555	0.822	0.507	1.01574e-37	CD8+ T-2	Fgl2
8.10673e-42	0.264874	1	0.947	1.42322e-37	CD8+ T-2	Rpl38
9.17225e-42	0.309489	0.951	0.706	1.61028e-37	CD8+ T-2	Cst7
1.0295e-41	0.267869	0.457	0.197	1.8074e-37	CD8+ T-2	Spry2
1.31447e-41	0.23567	0.994	0.921	2.30769e-37	CD8+ T-2	Cox8a
2.18142e-41	0.248221	0.992	0.946	3.8297e-37	CD8+ T-2	Rpl36
4.70574e-41	0.2514	0.994	0.908	8.26141e-37	CD8+ T-2	Rpl23a
6.58804e-41	0.219382	0.997	0.96	1.1566e-36	CD8+ T-2	Rpl6
8.05963e-41	0.284856	0.808	0.495	1.41495e-36	CD8+ T-2	Plek
1.184e-40	0.305195	0.99	0.896	2.07864e-36	CD8+ T-2	Rpl13a
1.2631e-40	0.310244	0.902	0.657	2.2175e-36	CD8+ T-2	Vps37b
4.01081e-40	0.251894	0.581	0.304	7.04138e-36	CD8+ T-2	Glmn
4.8732e-40	0.273951	0.994	0.936	8.55539e-36	CD8+ T-2	Rps26
1.01486e-39	0.209953	1	0.977	1.78168e-35	CD8+ T-2	Rpl23
2.26543e-39	0.234165	0.784	0.485	3.97719e-35	CD8+ T-2	Osbpl3
2.28966e-39	0.348604	0.665	0.375	4.01972e-35	CD8+ T-2	AA467197
2.42284e-39	0.203661	0.668	0.373	4.25354e-35	CD8+ T-2	Dapk2
1.37367e-38	0.21253	0.733	0.445	2.41162e-34	CD8+ T-2	Chst12
3.43117e-38	0.18795	0.624	0.345	6.02376e-34	CD8+ T-2	Lrrk1
3.51143e-38	0.241891	0.989	0.887	6.16467e-34	CD8+ T-2	Pfdn5
4.19397e-38	0.344368	0.892	0.659	7.36293e-34	CD8+ T-2	Capg
6.84573e-38	0.19802	0.449	0.209	1.20184e-33	CD8+ T-2	Srgap3
7.04946e-38	0.236871	0.929	0.607	1.2376e-33	CD8+ T-2	Irf8
1.17974e-37	0.238578	0.998	0.955	2.07115e-33	CD8+ T-2	Rps18
1.54218e-37	0.216547	0.995	0.951	2.70746e-33	CD8+ T-2	Rpl34
2.02472e-37	0.276761	0.881	0.639	3.5546e-33	CD8+ T-2	Grcc10
4.59502e-37	0.225674	0.995	0.911	8.06702e-33	CD8+ T-2	Naca
1.96506e-36	0.28226	0.99	0.919	3.44986e-32	CD8+ T-2	Rps28
3.09372e-36	0.185441	0.498	0.252	5.43133e-32	CD8+ T-2	Adam8
6.38911e-36	0.25809	0.746	0.483	1.12167e-31	CD8+ T-2	Eva1b
6.46199e-36	0.25722	0.805	0.527	1.13447e-31	CD8+ T-2	Sla2
9.61022e-36	0.196653	0.998	0.979	1.68717e-31	CD8+ T-2	Rpl13
1.4889e-35	0.14509	0.327	0.123	2.61392e-31	CD8+ T-2	A430046D13Rik
2.0501e-35	0.23449	0.984	0.8	3.59915e-31	CD8+ T-2	Cd8b1
2.43428e-35	0.258415	0.992	0.924	4.27362e-31	CD8+ T-2	Sh3bgrl3
2.96563e-35	0.340017	0.721	0.435	5.20646e-31	CD8+ T-2	Klre1
3.96461e-35	0.2007	0.414	0.183	6.96027e-31	CD8+ T-2	Chn2
3.97973e-35	0.271909	0.914	0.702	6.98682e-31	CD8+ T-2	Pgls
6.48497e-35	0.311188	0.992	0.898	1.1385e-30	CD8+ T-2	Uba52
1.03373e-34	0.191737	0.995	0.962	1.81482e-30	CD8+ T-2	Rps9
1.69029e-34	0.233985	0.994	0.916	2.96748e-30	CD8+ T-2	Rpl36a
3.18056e-34	0.242974	0.89	0.598	5.58379e-30	CD8+ T-2	2021-09-11
6.40952e-34	0.235819	0.702	0.445	1.12525e-29	CD8+ T-2	Eid1
1.28797e-33	0.231378	0.403	0.175	2.26115e-29	CD8+ T-2	Trgv2
1.51141e-33	0.223144	0.987	0.898	2.65343e-29	CD8+ T-2	Eif3f
1.68812e-33	0.212294	0.995	0.933	2.96367e-29	CD8+ T-2	Rpl26
3.45275e-33	0.254747	0.868	0.623	6.06165e-29	CD8+ T-2	Inpp4b
3.77707e-33	0.209865	0.989	0.913	6.63102e-29	CD8+ T-2	Rpl22
3.85134e-33	0.206658	0.995	0.946	6.76141e-29	CD8+ T-2	Rps23
6.00493e-33	0.176947	0.781	0.512	1.05423e-28	CD8+ T-2	Sema4a
6.44749e-33	0.226543	0.99	0.929	1.13192e-28	CD8+ T-2	Rpl4
1.88324e-32	0.1994	0.738	0.475	3.30621e-28	CD8+ T-2	Mef2a
4.35135e-32	0.2197	0.727	0.465	7.63923e-28	CD8+ T-2	Chsy1
4.74217e-32	0.216825	0.997	0.946	8.32535e-28	CD8+ T-2	Rpl10a
5.60497e-32	0.199631	0.998	0.966	9.84009e-28	CD8+ T-2	Rps3a1
6.49377e-32	0.211035	0.773	0.488	1.14005e-27	CD8+ T-2	1700017B05Rik
1.10072e-31	0.170064	0.441	0.215	1.93242e-27	CD8+ T-2	Zfp318
1.55425e-31	0.210362	0.998	0.965	2.72864e-27	CD8+ T-2	Rpl37a
1.98696e-31	0.244473	0.984	0.877	3.48831e-27	CD8+ T-2	Gpi1
2.28831e-31	0.189309	0.829	0.582	4.01735e-27	CD8+ T-2	Ptk2b
3.03777e-31	0.237958	0.965	0.791	5.33311e-27	CD8+ T-2	Rap1a
3.64259e-31	0.357689	0.868	0.644	6.39493e-27	CD8+ T-2	Plac8
4.37935e-31	0.202451	0.992	0.934	7.68839e-27	CD8+ T-2	Cd3e
5.23886e-31	0.178637	1	0.978	9.19735e-27	CD8+ T-2	Fau
5.56316e-31	0.128389	0.356	0.151	9.76668e-27	CD8+ T-2	Gpr34
5.92863e-31	0.169222	1	0.966	1.04083e-26	CD8+ T-2	Rps24
7.2642e-31	0.179532	0.995	0.961	1.2753e-26	CD8+ T-2	Rpl21
7.86319e-31	0.216014	0.99	0.885	1.38046e-26	CD8+ T-2	Uqcrh
8.59226e-31	0.170252	0.995	0.959	1.50846e-26	CD8+ T-2	Rplp2
9.69725e-31	0.260789	0.808	0.57	1.70245e-26	CD8+ T-2	Gstp1
1.19783e-30	0.210386	0.992	0.896	2.10291e-26	CD8+ T-2	Btf3
1.33099e-30	0.167148	0.398	0.195	2.33669e-26	CD8+ T-2	Frmd4a
2.60946e-30	0.115782	0.205	0.06	4.58116e-26	CD8+ T-2	Jam2
3.57532e-30	0.235704	0.84	0.591	6.27683e-26	CD8+ T-2	Tox
3.86116e-30	0.17777	0.998	0.959	6.77866e-26	CD8+ T-2	Rps3
8.80956e-30	0.198311	1	0.975	1.54661e-25	CD8+ T-2	Rps8
1.00137e-29	0.216878	0.99	0.89	1.758e-25	CD8+ T-2	Cox7c
1.02813e-29	0.195733	0.997	0.94	1.80498e-25	CD8+ T-2	Rack1
1.50104e-29	0.183403	0.924	0.596	2.63523e-25	CD8+ T-2	Tnfrsf9
1.67781e-29	0.218831	0.994	0.941	2.94557e-25	CD8+ T-2	Rpl10
1.72037e-29	0.191807	0.998	0.974	3.02028e-25	CD8+ T-2	Rps21
1.97916e-29	0.223552	0.662	0.423	3.47461e-25	CD8+ T-2	Smyd3
2.35772e-29	0.221911	0.983	0.889	4.13921e-25	CD8+ T-2	Aes
2.77668e-29	0.205774	0.956	0.674	4.87474e-25	CD8+ T-2	Rbpj
3.05225e-29	0.15805	0.987	0.809	5.35853e-25	CD8+ T-2	Cxcr6
9.11998e-29	0.191172	0.513	0.28	1.6011e-24	CD8+ T-2	Gprin3
1.34133e-28	0.333482	0.81	0.573	2.35483e-24	CD8+ T-2	Serpina3g
1.35988e-28	0.218336	0.987	0.88	2.3874e-24	CD8+ T-2	Atp5e
1.96205e-28	0.236757	0.24	0.084	3.44457e-24	CD8+ T-2	Fcrl6
2.35567e-28	0.147903	0.66	0.403	4.13561e-24	CD8+ T-2	Entpd1
6.33955e-28	0.211861	0.884	0.627	1.11297e-23	CD8+ T-2	Ncf4
9.36384e-28	0.220813	0.971	0.824	1.64392e-23	CD8+ T-2	Eif3e
1.11227e-27	0.173247	0.602	0.354	1.9527e-23	CD8+ T-2	Nedd4
1.1635e-27	0.170158	0.811	0.566	2.04263e-23	CD8+ T-2	Glrx
1.35128e-27	0.215712	0.771	0.541	2.37231e-23	CD8+ T-2	Cops4
1.78222e-27	0.143735	0.354	0.165	3.12887e-23	CD8+ T-2	Adrb1
2.44392e-27	0.209094	1	0.967	4.29054e-23	CD8+ T-2	Rpl41
2.70947e-27	0.19955	0.716	0.445	4.75675e-23	CD8+ T-2	Gm19585
3.58592e-27	0.208714	0.998	0.961	6.29544e-23	CD8+ T-2	Rpl28
5.16167e-27	0.19958	1	0.912	9.06183e-23	CD8+ T-2	Nkg7
6.16659e-27	0.173131	0.997	0.937	1.08261e-22	CD8+ T-2	Rpl12
1.12228e-26	0.225474	0.91	0.701	1.97028e-22	CD8+ T-2	Efhd2
1.23142e-26	0.168771	0.998	0.968	2.16189e-22	CD8+ T-2	Rpl9
2.74235e-26	0.193005	0.933	0.755	4.81448e-22	CD8+ T-2	Prdx5
3.02755e-26	0.149039	0.322	0.144	5.31516e-22	CD8+ T-2	Ppp2r2c
3.6237e-26	0.195085	0.992	0.931	6.36177e-22	CD8+ T-2	Myl6
4.36246e-26	0.257576	0.973	0.775	7.65874e-22	CD8+ T-2	Anxa2
5.2626e-26	0.179562	1	0.961	9.23902e-22	CD8+ T-2	AW112010
5.55077e-26	0.156821	0.705	0.454	9.74494e-22	CD8+ T-2	Ppp3cc
8.91014e-26	0.143615	0.238	0.087	1.56426e-21	CD8+ T-2	Styk1
1.28141e-25	0.222244	0.994	0.918	2.24964e-21	CD8+ T-2	Rpl35
2.15109e-25	0.183967	0.987	0.911	3.77645e-21	CD8+ T-2	Cox4i1
3.40835e-25	0.177874	0.776	0.539	5.98369e-21	CD8+ T-2	Anxa11
3.44727e-25	0.19729	0.911	0.634	6.05203e-21	CD8+ T-2	Klrc1
3.63173e-25	0.15283	0.794	0.552	6.37586e-21	CD8+ T-2	Cd96
4.30675e-25	0.12177	0.311	0.139	7.56094e-21	CD8+ T-2	Fam71b
5.56226e-25	0.17449	0.997	0.953	9.76511e-21	CD8+ T-2	Rps5
6.99758e-25	0.22841	0.929	0.736	1.22849e-20	CD8+ T-2	Klrd1
8.15875e-25	0.173126	0.762	0.513	1.43235e-20	CD8+ T-2	Lrmp
1.1311e-24	0.126949	0.844	0.613	1.98577e-20	CD8+ T-2	Ugcg
1.20295e-24	0.240657	0.965	0.825	2.1119e-20	CD8+ T-2	Gm11808
1.9177e-24	0.165066	0.995	0.951	3.36671e-20	CD8+ T-2	Rpl35a
2.12295e-24	0.164445	0.997	0.958	3.72705e-20	CD8+ T-2	Rps10
2.53134e-24	0.165844	0.998	0.959	4.44401e-20	CD8+ T-2	Rps27a
2.57966e-24	0.151794	0.583	0.343	4.52885e-20	CD8+ T-2	Camk2n1
2.89373e-24	0.125945	0.197	0.068	5.08024e-20	CD8+ T-2	Epdr1
2.91386e-24	0.193673	0.998	0.97	5.11557e-20	CD8+ T-2	Rps2
3.03021e-24	0.223167	0.959	0.784	5.31983e-20	CD8+ T-2	Cox17
6.95651e-24	0.158265	0.87	0.665	1.22129e-19	CD8+ T-2	Pld3
7.09654e-24	0.186488	0.992	0.915	1.24587e-19	CD8+ T-2	Eef1b2
1.6686e-23	0.103361	0.179	0.057	2.92939e-19	CD8+ T-2	Cited4
1.70558e-23	0.152215	0.998	0.969	2.99432e-19	CD8+ T-2	Rpl19
1.78895e-23	0.493785	0.675	0.432	3.14068e-19	CD8+ T-2	Mt1
1.91116e-23	0.204729	1	0.993	3.35524e-19	CD8+ T-2	Tmsb4x
3.3517e-23	0.172519	0.997	0.976	5.88425e-19	CD8+ T-2	Rpsa
3.70346e-23	0.16406	0.441	0.248	6.50179e-19	CD8+ T-2	Ikzf4
5.01114e-23	0.117589	0.335	0.156	8.79756e-19	CD8+ T-2	Osgin1
6.4806e-23	0.163093	0.438	0.243	1.13773e-18	CD8+ T-2	Napsa
7.22706e-23	0.196305	0.978	0.845	1.26878e-18	CD8+ T-2	Atp5f1
7.71653e-23	0.174566	0.662	0.441	1.35471e-18	CD8+ T-2	Rps6ka1
1.02654e-22	0.161386	0.935	0.757	1.8022e-18	CD8+ T-2	Ctla2a
1.1364e-22	0.160693	0.995	0.966	1.99506e-18	CD8+ T-2	Rps20
1.22982e-22	0.129037	0.997	0.966	2.15908e-18	CD8+ T-2	Fxyd5
1.77291e-22	0.126348	0.443	0.249	3.11253e-18	CD8+ T-2	Nek6
1.77804e-22	0.15767	0.805	0.542	3.12152e-18	CD8+ T-2	Ubash3b
1.78399e-22	0.136198	0.583	0.365	3.13197e-18	CD8+ T-2	Fndc3a
2.91502e-22	0.140225	0.846	0.626	5.1176e-18	CD8+ T-2	Nucb1
4.31275e-22	0.167368	0.957	0.761	7.57146e-18	CD8+ T-2	Prr13
4.82474e-22	0.192412	0.981	0.853	8.47031e-18	CD8+ T-2	Ubl5
7.79708e-22	0.153046	0.721	0.498	1.36885e-17	CD8+ T-2	Unc119
1.02152e-21	0.159478	0.737	0.502	1.79339e-17	CD8+ T-2	Atxn10
1.41478e-21	0.131075	0.908	0.729	2.48379e-17	CD8+ T-2	Dock10
1.50279e-21	0.159636	0.998	0.963	2.6383e-17	CD8+ T-2	Rps29
1.53431e-21	0.202136	0.96	0.834	2.69364e-17	CD8+ T-2	Nsa2
1.55855e-21	0.172052	1	0.967	2.73619e-17	CD8+ T-2	Rplp0
2.08292e-21	0.201913	0.967	0.817	3.65678e-17	CD8+ T-2	Sh2d2a
2.375e-21	0.177003	0.895	0.716	4.16955e-17	CD8+ T-2	Prkch
3.34591e-21	0.124522	0.425	0.237	5.87409e-17	CD8+ T-2	Snx9
3.41198e-21	0.180702	0.927	0.74	5.99007e-17	CD8+ T-2	Mrps16
3.93623e-21	0.136624	0.66	0.451	6.91044e-17	CD8+ T-2	3830406C13Rik
4.64428e-21	0.153594	0.76	0.516	8.1535e-17	CD8+ T-2	Glipr1
4.84177e-21	0.119886	0.303	0.149	8.50021e-17	CD8+ T-2	Fut7
7.04533e-21	0.194469	0.849	0.612	1.23688e-16	CD8+ T-2	Mrpl54
8.7206e-21	0.190096	0.887	0.67	1.53099e-16	CD8+ T-2	Lamtor4
9.09876e-21	0.182434	0.822	0.607	1.59738e-16	CD8+ T-2	Snx5
9.75919e-21	0.172226	0.738	0.514	1.71332e-16	CD8+ T-2	Uqcc3
1.01703e-20	0.153761	0.278	0.126	1.7855e-16	CD8+ T-2	Csf1
1.51421e-20	0.165965	0.83	0.601	2.65835e-16	CD8+ T-2	Bin1
2.50769e-20	0.187283	0.894	0.688	4.4025e-16	CD8+ T-2	Zyx
2.51616e-20	0.165878	0.994	0.934	4.41738e-16	CD8+ T-2	Rpl5
2.72913e-20	0.168808	0.981	0.874	4.79126e-16	CD8+ T-2	Clta
3.13656e-20	0.145358	0.797	0.556	5.50654e-16	CD8+ T-2	Ehd1
3.24042e-20	0.109743	0.44	0.256	5.68888e-16	CD8+ T-2	Pdgfb
3.30494e-20	0.171407	0.714	0.517	5.80215e-16	CD8+ T-2	Cetn2
3.55636e-20	0.772915	0.319	0.163	6.24355e-16	CD8+ T-2	Ifitm1
3.92483e-20	0.158868	0.995	0.955	6.89042e-16	CD8+ T-2	Rps27
6.4919e-20	0.127617	0.727	0.501	1.13972e-15	CD8+ T-2	Mdfic
6.83315e-20	0.118307	0.976	0.866	1.19963e-15	CD8+ T-2	Ctsw
7.05268e-20	0.184962	0.646	0.436	1.23817e-15	CD8+ T-2	Serpinb6a
7.76864e-20	0.159098	0.794	0.582	1.36386e-15	CD8+ T-2	Lims1
8.50542e-20	0.104563	0.265	0.122	1.49321e-15	CD8+ T-2	Rgs8
1.10802e-19	0.128196	0.613	0.414	1.94523e-15	CD8+ T-2	Ebpl
1.32537e-19	0.125896	0.497	0.309	2.32683e-15	CD8+ T-2	Ncor2
1.64013e-19	0.155898	0.954	0.832	2.87942e-15	CD8+ T-2	Runx3
1.8427e-19	0.160037	0.973	0.849	3.23504e-15	CD8+ T-2	Cox7a2l
1.84577e-19	0.187469	0.943	0.731	3.24044e-15	CD8+ T-2	Nap1l1
2.87804e-19	0.126995	0.775	0.577	5.05269e-15	CD8+ T-2	Dock8
3.09673e-19	0.200344	0.962	0.78	5.43663e-15	CD8+ T-2	Hnrnpa1
3.38689e-19	0.139006	0.595	0.404	5.94603e-15	CD8+ T-2	Mob2
3.78353e-19	0.119248	0.389	0.218	6.64237e-15	CD8+ T-2	Rhoc
3.80153e-19	0.11129	0.278	0.131	6.67397e-15	CD8+ T-2	Pim2
5.05755e-19	0.205551	0.978	0.835	8.87904e-15	CD8+ T-2	Id2
5.7048e-19	0.125441	0.998	0.972	1.00154e-14	CD8+ T-2	Rps16
6.32825e-19	0.175768	0.994	0.928	1.11099e-14	CD8+ T-2	Rps6
6.33616e-19	0.112553	0.198	0.078	1.11238e-14	CD8+ T-2	Ly6g5b
6.69013e-19	0.172242	0.719	0.514	1.17452e-14	CD8+ T-2	Gstp3
7.90025e-19	0.17904	0.998	0.975	1.38697e-14	CD8+ T-2	Actg1
1.15087e-18	0.144054	0.705	0.497	2.02047e-14	CD8+ T-2	Rgs3
1.22543e-18	0.187485	0.986	0.904	2.15137e-14	CD8+ T-2	Lgals1
1.29961e-18	0.171246	0.986	0.871	2.2816e-14	CD8+ T-2	Atp5d
2.00754e-18	0.151686	0.779	0.598	3.52443e-14	CD8+ T-2	Use1
2.60426e-18	0.136919	0.313	0.159	4.57205e-14	CD8+ T-2	Sema6d
2.70373e-18	0.151486	0.994	0.955	4.74666e-14	CD8+ T-2	Rps19
2.89857e-18	0.127336	0.297	0.152	5.08874e-14	CD8+ T-2	Gldc
2.92489e-18	0.167217	0.997	0.937	5.13493e-14	CD8+ T-2	Rpl15
3.23629e-18	0.113051	0.657	0.433	5.68162e-14	CD8+ T-2	Tm6sf1
3.33318e-18	0.150647	0.998	0.953	5.85174e-14	CD8+ T-2	Rps4x
4.16619e-18	0.168424	0.984	0.903	7.31416e-14	CD8+ T-2	Cox6c
6.70281e-18	0.134253	0.844	0.631	1.17675e-13	CD8+ T-2	Ccni
9.17237e-18	0.139019	0.668	0.472	1.6103e-13	CD8+ T-2	Gm17018
9.94012e-18	0.152903	0.937	0.73	1.74509e-13	CD8+ T-2	Gng2
1.00708e-17	0.156392	0.844	0.639	1.76803e-13	CD8+ T-2	Ndufs2
1.38935e-17	0.146538	0.995	0.948	2.43914e-13	CD8+ T-2	Rps14
1.48954e-17	0.106957	0.338	0.181	2.61504e-13	CD8+ T-2	AL590144.2
1.94452e-17	0.139437	0.973	0.827	3.4138e-13	CD8+ T-2	Reep5
2.05978e-17	0.107548	0.367	0.212	3.61615e-13	CD8+ T-2	Tomm40l
2.22918e-17	0.129549	0.684	0.486	3.91354e-13	CD8+ T-2	Cnot3
3.28675e-17	0.171489	0.973	0.849	5.77022e-13	CD8+ T-2	Sec61g
4.11735e-17	0.129838	0.3	0.16	7.22843e-13	CD8+ T-2	Gcnt1
4.3128e-17	0.114243	0.759	0.56	7.57155e-13	CD8+ T-2	Rnf166
4.40927e-17	0.110915	0.384	0.225	7.74092e-13	CD8+ T-2	Agpat2
5.01556e-17	0.127897	0.735	0.55	8.80532e-13	CD8+ T-2	Pold4
5.79319e-17	0.135246	0.53	0.349	1.01705e-12	CD8+ T-2	Lxn
6.0631e-17	0.189876	0.924	0.715	1.06444e-12	CD8+ T-2	Aprt
6.26047e-17	0.114407	0.762	0.533	1.09909e-12	CD8+ T-2	Ciapin1
7.58547e-17	0.152213	0.935	0.767	1.3317e-12	CD8+ T-2	Mrpl52
8.72882e-17	0.146196	0.862	0.617	1.53243e-12	CD8+ T-2	Dap
1.01047e-16	0.127736	0.773	0.561	1.77399e-12	CD8+ T-2	Cish
1.17204e-16	0.119162	0.276	0.141	2.05764e-12	CD8+ T-2	Aldoc
1.70022e-16	0.159156	0.848	0.629	2.98491e-12	CD8+ T-2	Tmem256
1.9296e-16	0.129316	0.811	0.596	3.3876e-12	CD8+ T-2	Jaml
2.16304e-16	0.101309	0.646	0.443	3.79744e-12	CD8+ T-2	Ppm1h
2.75016e-16	0.176375	0.981	0.869	4.82818e-12	CD8+ T-2	Rpl22l1
3.11981e-16	0.100828	0.702	0.493	5.47714e-12	CD8+ T-2	Smim14
4.04057e-16	0.129417	0.792	0.577	7.09363e-12	CD8+ T-2	D16Ertd472e
4.13742e-16	0.10942	0.684	0.488	7.26366e-12	CD8+ T-2	Borcs8
4.55537e-16	0.122251	1	0.968	7.99741e-12	CD8+ T-2	Rpl18
6.42933e-16	0.156448	0.956	0.829	1.12873e-11	CD8+ T-2	Edf1
6.65437e-16	0.122224	0.944	0.806	1.16824e-11	CD8+ T-2	Rnaset2b
6.81267e-16	0.117418	0.624	0.432	1.19603e-11	CD8+ T-2	Hcfc1r1
7.34383e-16	0.10555	0.425	0.265	1.28928e-11	CD8+ T-2	Iqsec1
9.63498e-16	0.111674	0.798	0.61	1.69152e-11	CD8+ T-2	Nedd9
1.23483e-15	0.147997	0.746	0.562	2.16788e-11	CD8+ T-2	Cmc1
1.37494e-15	0.107678	0.81	0.596	2.41384e-11	CD8+ T-2	Ndfip2
1.37675e-15	0.117044	0.737	0.536	2.41702e-11	CD8+ T-2	Lasp1
1.61329e-15	0.121901	0.763	0.565	2.83229e-11	CD8+ T-2	Rabgap1l
1.63044e-15	0.162431	0.99	0.902	2.8624e-11	CD8+ T-2	Rbm3
1.76122e-15	0.140339	0.995	0.941	3.09199e-11	CD8+ T-2	Rac2
1.7786e-15	0.144959	0.851	0.631	3.12252e-11	CD8+ T-2	Romo1
1.87836e-15	0.144225	0.806	0.607	3.29765e-11	CD8+ T-2	Cox20
2.0858e-15	0.148869	0.952	0.792	3.66182e-11	CD8+ T-2	Ndufa6
2.53764e-15	0.12536	0.752	0.567	4.45508e-11	CD8+ T-2	Kxd1
2.53896e-15	0.164273	0.938	0.759	4.4574e-11	CD8+ T-2	Eif3i
2.57869e-15	0.136211	0.937	0.783	4.52716e-11	CD8+ T-2	Srp14
3.24348e-15	0.108491	0.673	0.471	5.69425e-11	CD8+ T-2	Ide
4.63855e-15	0.100346	0.732	0.501	8.14343e-11	CD8+ T-2	Stk39
5.32424e-15	0.122454	0.648	0.47	9.34724e-11	CD8+ T-2	Mea1
5.51108e-15	0.103632	0.5	0.333	9.67525e-11	CD8+ T-2	Agpat4
6.0277e-15	0.140926	0.814	0.6	1.05822e-10	CD8+ T-2	Casp3
7.47818e-15	0.149651	0.981	0.882	1.31287e-10	CD8+ T-2	Slc25a3
9.57308e-15	0.132325	0.995	0.939	1.68065e-10	CD8+ T-2	Rpl29
1.19995e-14	0.124727	0.873	0.698	2.10663e-10	CD8+ T-2	Arhgap9
1.84551e-14	0.142774	0.99	0.911	3.23998e-10	CD8+ T-2	Rpl36al
2.05814e-14	0.127402	0.875	0.682	3.61327e-10	CD8+ T-2	Sugt1
2.16007e-14	0.101134	0.752	0.559	3.79222e-10	CD8+ T-2	Arrb2
2.49947e-14	0.132297	0.77	0.581	4.38807e-10	CD8+ T-2	Churc1
3.00191e-14	0.262382	0.363	0.218	5.27015e-10	CD8+ T-2	Mt2
3.41187e-14	0.115858	0.638	0.45	5.98989e-10	CD8+ T-2	Bloc1s1
3.49892e-14	0.141672	0.965	0.807	6.1427e-10	CD8+ T-2	Sri
3.50559e-14	0.138568	0.879	0.672	6.15442e-10	CD8+ T-2	Mrps21
3.59533e-14	0.149551	0.924	0.748	6.31196e-10	CD8+ T-2	Capns1
3.73829e-14	0.106538	0.406	0.26	6.56294e-10	CD8+ T-2	Rpap2
4.79765e-14	0.102156	0.433	0.283	8.42276e-10	CD8+ T-2	Gyg
4.82015e-14	0.109832	0.99	0.912	8.46226e-10	CD8+ T-2	Ndufa13
5.31013e-14	0.103823	0.832	0.642	9.32247e-10	CD8+ T-2	Actr10
6.78591e-14	0.122066	0.902	0.701	1.19133e-09	CD8+ T-2	Tmem160
7.24464e-14	0.12121	0.573	0.415	1.27187e-09	CD8+ T-2	B3gat3
7.34474e-14	0.160113	0.879	0.679	1.28944e-09	CD8+ T-2	Bola2
7.55511e-14	0.137674	0.956	0.782	1.32638e-09	CD8+ T-2	S100a13
8.37164e-14	0.141906	0.96	0.806	1.46972e-09	CD8+ T-2	Anxa6
8.70545e-14	0.134153	0.981	0.855	1.52833e-09	CD8+ T-2	Eif3k
8.95068e-14	0.118099	0.96	0.844	1.57138e-09	CD8+ T-2	Vasp
1.04682e-13	0.111541	0.603	0.423	1.8378e-09	CD8+ T-2	Gm2000
1.06935e-13	0.113483	0.757	0.551	1.87735e-09	CD8+ T-2	Tmem126a
1.74166e-13	0.125356	0.819	0.614	3.05765e-09	CD8+ T-2	Tbcb
1.80022e-13	0.102002	0.998	0.972	3.16046e-09	CD8+ T-2	Rplp1
2.92084e-13	0.130837	0.778	0.599	5.12783e-09	CD8+ T-2	Ntan1
4.36402e-13	0.130686	0.714	0.537	7.66147e-09	CD8+ T-2	Fli1
4.40194e-13	0.104594	0.66	0.466	7.72804e-09	CD8+ T-2	Dcps
4.63891e-13	0.140944	0.989	0.906	8.14406e-09	CD8+ T-2	Rps25
5.1324e-13	0.107418	0.995	0.961	9.01044e-09	CD8+ T-2	Rpl8
6.21761e-13	0.14507	0.954	0.79	1.09156e-08	CD8+ T-2	Eif3m
6.72971e-13	0.100552	0.571	0.392	1.18147e-08	CD8+ T-2	Arsb
8.11289e-13	0.140919	0.967	0.828	1.4243e-08	CD8+ T-2	Tomm7
8.74095e-13	1.4654	0.144	0.061	1.53456e-08	CD8+ T-2	Gzmf
1.26509e-12	0.152018	0.981	0.864	2.221e-08	CD8+ T-2	Myl12a
1.26809e-12	0.162839	0.216	0.112	2.22626e-08	CD8+ T-2	Sult2b1
1.51468e-12	0.108987	0.811	0.62	2.65917e-08	CD8+ T-2	1700020I14Rik
1.5512e-12	0.128453	0.671	0.498	2.72329e-08	CD8+ T-2	Ptp4a3
1.59097e-12	0.127912	0.925	0.735	2.79311e-08	CD8+ T-2	Ndufa1
2.49559e-12	0.120815	0.995	0.947	4.38126e-08	CD8+ T-2	Rpl7
2.59342e-12	0.106067	0.786	0.602	4.553e-08	CD8+ T-2	Higd2a
2.70936e-12	0.145359	0.821	0.607	4.75655e-08	CD8+ T-2	Etfb
2.83834e-12	0.100594	0.924	0.732	4.98299e-08	CD8+ T-2	Zap70
2.98158e-12	0.122242	0.952	0.78	5.23446e-08	CD8+ T-2	Rtraf
3.43449e-12	0.105705	0.835	0.634	6.02958e-08	CD8+ T-2	Rnh1
4.03553e-12	0.127812	0.919	0.724	7.08478e-08	CD8+ T-2	Cct5
4.12339e-12	0.136582	0.973	0.852	7.23902e-08	CD8+ T-2	Psmb1
6.88434e-12	0.106106	0.805	0.63	1.20861e-07	CD8+ T-2	Fermt3
7.21012e-12	0.105809	0.543	0.396	1.26581e-07	CD8+ T-2	Hint3
7.47767e-12	0.108456	0.849	0.675	1.31278e-07	CD8+ T-2	Aimp1
7.59343e-12	0.135242	0.91	0.708	1.3331e-07	CD8+ T-2	Gm10076
7.99743e-12	0.129093	0.994	0.94	1.40403e-07	CD8+ T-2	Rpl14
8.2244e-12	0.117287	0.843	0.676	1.44388e-07	CD8+ T-2	2021-09-09
8.63139e-12	0.101753	0.454	0.306	1.51533e-07	CD8+ T-2	St3gal6
8.95777e-12	0.10848	0.998	0.958	1.57263e-07	CD8+ T-2	Rps15
9.46352e-12	0.137964	0.992	0.91	1.66141e-07	CD8+ T-2	Serf2
1.24155e-11	0.122194	0.87	0.678	2.17966e-07	CD8+ T-2	Ifi27
1.3606e-11	0.116806	0.463	0.329	2.38867e-07	CD8+ T-2	Dtnbp1
1.36156e-11	0.123955	0.989	0.9	2.39035e-07	CD8+ T-2	Thy1
1.74496e-11	0.130512	0.952	0.806	3.06345e-07	CD8+ T-2	Cox7b
2.00367e-11	0.175963	0.989	0.905	3.51764e-07	CD8+ T-2	Aldoa
2.29982e-11	0.187882	0.763	0.631	4.03756e-07	CD8+ T-2	Lgals3
2.44506e-11	0.126916	0.913	0.768	4.29255e-07	CD8+ T-2	Lrrfip1
2.46808e-11	0.10251	0.837	0.646	4.33296e-07	CD8+ T-2	1810058I24Rik
2.58156e-11	0.130661	0.981	0.855	4.53218e-07	CD8+ T-2	Cox5a
2.8659e-11	0.144521	0.983	0.865	5.03138e-07	CD8+ T-2	Capzb
4.18121e-11	0.106786	0.573	0.415	7.34054e-07	CD8+ T-2	Hscb
4.83513e-11	0.109406	0.938	0.758	8.48856e-07	CD8+ T-2	Cdc37
4.86006e-11	0.10009	0.671	0.503	8.53233e-07	CD8+ T-2	Atp6v1e1
5.63574e-11	0.124146	0.921	0.732	9.8941e-07	CD8+ T-2	Trmt112
6.03266e-11	0.128815	0.986	0.873	1.05909e-06	CD8+ T-2	Atp5l
6.30891e-11	0.111185	0.925	0.712	1.10759e-06	CD8+ T-2	Uqcr11
8.43947e-11	0.122407	0.975	0.847	1.48163e-06	CD8+ T-2	Cnn2
1.53996e-10	0.104424	0.976	0.867	2.70355e-06	CD8+ T-2	Selenow
3.60111e-10	0.127775	0.937	0.752	6.32211e-06	CD8+ T-2	Slc25a4
4.15155e-10	0.12241	0.995	0.949	7.28846e-06	CD8+ T-2	Pfn1
5.30398e-10	0.117736	0.827	0.633	9.31167e-06	CD8+ T-2	Fundc2
6.02915e-10	0.122974	0.944	0.743	1.05848e-05	CD8+ T-2	Atp5k
6.32351e-10	0.100719	0.917	0.73	1.11016e-05	CD8+ T-2	Pebp1
7.01621e-10	0.108235	0.93	0.753	1.23177e-05	CD8+ T-2	Tmem258
8.97896e-10	0.112235	0.975	0.86	1.57635e-05	CD8+ T-2	Eef1d
2.47268e-09	0.126004	0.962	0.813	4.34103e-05	CD8+ T-2	Prelid1
2.6491e-09	0.111278	0.978	0.869	4.65075e-05	CD8+ T-2	Eef1g
2.94995e-09	0.248016	0.448	0.32	5.17893e-05	CD8+ T-2	Ifitm2
3.79668e-09	0.132587	0.978	0.862	6.66545e-05	CD8+ T-2	Rpl31
4.64473e-09	0.109804	0.863	0.707	8.15428e-05	CD8+ T-2	Cops9
5.8522e-09	0.104997	0.956	0.762	0.000102741	CD8+ T-2	Uqcrb
7.25506e-09	0.119417	0.981	0.861	0.00012737	CD8+ T-2	Sem1
8.02459e-09	0.118918	0.981	0.873	0.00014088	CD8+ T-2	Atp5g2
1.00784e-08	0.104997	0.933	0.752	0.000176937	CD8+ T-2	Csnk2b
2.24857e-08	0.112202	0.952	0.801	0.000394758	CD8+ T-2	Atp6v1f
2.45926e-08	0.141081	0.944	0.794	0.000431748	CD8+ T-2	Pgk1
2.06748e-07	0.100218	0.979	0.868	0.00362968	CD8+ T-2	Rps17
2.63883e-07	0.109889	0.97	0.845	0.00463273	CD8+ T-2	Atp5c1
3.23495e-07	0.129426	0.917	0.755	0.00567929	CD8+ T-2	Pgam1
5.00294e-07	0.110967	0.984	0.863	0.00878316	CD8+ T-2	Atp5j2
1.70668e-06	0.517694	0.192	0.123	0.0299626	CD8+ T-2	Gzmc
3.10239e-06	0.100252	0.986	0.854	0.0544656	CD8+ T-2	Cox5b
4.65413e-06	0.121846	0.354	0.26	0.0817078	CD8+ T-2	Bnip3
0.000168538	0.297795	0.449	0.372	1	CD8+ T-2	Fcer1g
0.00402532	0.814285	0.213	0.165	1	CD8+ T-2	Spp1
2.29568e-124	1.01938	0.929	0.496	4.03029e-120	CD8+ T-3	Rgs16
7.37515e-101	0.812816	0.923	0.658	1.29478e-96	CD8+ T-3	Bcl2a1d
1.99766e-89	0.543504	0.412	0.085	3.50709e-85	CD8+ T-3	Gpm6b
5.01587e-82	0.795707	0.923	0.706	8.80585e-78	CD8+ T-3	Lag3
8.19871e-79	0.656071	0.943	0.762	1.43937e-74	CD8+ T-3	Bcl2a1b
1.07598e-78	0.694506	0.913	0.675	1.889e-74	CD8+ T-3	Ptms
3.42949e-76	0.817321	0.954	0.847	6.02081e-72	CD8+ T-3	Sdf4
1.49451e-65	0.567079	0.659	0.304	2.62377e-61	CD8+ T-3	Cx3cr1
6.43799e-63	0.59453	0.564	0.23	1.13025e-58	CD8+ T-3	Cd160
2.49407e-62	0.487127	0.416	0.122	4.37859e-58	CD8+ T-3	Pacsin1
2.88703e-62	1.42265	0.804	0.554	5.06848e-58	CD8+ T-3	Ifng
1.40757e-61	0.344108	0.224	0.03	2.47113e-57	CD8+ T-3	Egr2
5.27493e-61	0.475315	0.527	0.206	9.26067e-57	CD8+ T-3	Alcam
5.96171e-60	0.41661	0.547	0.216	1.04664e-55	CD8+ T-3	Chst2
1.85179e-58	0.570424	0.82	0.553	3.251e-54	CD8+ T-3	Ubash3b
2.38919e-54	1.80931	0.335	0.093	4.19447e-50	CD8+ T-3	Ccl1
6.60145e-54	2.0046	0.594	0.311	1.15895e-49	CD8+ T-3	Ccl3
4.66221e-51	0.261258	0.192	0.027	8.18497e-47	CD8+ T-3	Cnih2
8.31837e-51	0.460409	0.822	0.564	1.46037e-46	CD8+ T-3	Ehd1
1.12686e-50	0.480884	0.925	0.695	1.97831e-46	CD8+ T-3	Rbpj
1.99254e-50	0.436453	0.861	0.646	3.4981e-46	CD8+ T-3	Ndfip1
4.33692e-50	0.410449	0.901	0.747	7.61389e-46	CD8+ T-3	Zap70
3.42828e-49	0.385503	0.43	0.166	6.01868e-45	CD8+ T-3	Dusp4
4.19604e-49	0.178592	0.125	0.008	7.36656e-45	CD8+ T-3	Bdh2
7.72995e-49	0.472569	0.935	0.704	1.35707e-44	CD8+ T-3	Pdcd1
2.35333e-46	0.471474	0.703	0.434	4.1315e-42	CD8+ T-3	Orai1
3.36921e-46	0.565568	0.517	0.25	5.91499e-42	CD8+ T-3	Zbtb32
4.22694e-45	0.425019	0.503	0.227	7.42082e-41	CD8+ T-3	Vamp5
4.83837e-45	0.40123	0.461	0.2	8.49424e-41	CD8+ T-3	Ptprs
6.18798e-45	0.612359	0.659	0.395	1.08636e-40	CD8+ T-3	Eea1
3.73902e-43	0.434422	0.826	0.591	6.56422e-39	CD8+ T-3	Samsn1
1.59714e-41	0.458763	0.283	0.081	2.80394e-37	CD8+ T-3	Nr4a3
4.74127e-41	0.351447	0.246	0.06	8.32377e-37	CD8+ T-3	Nr4a1
4.75284e-41	0.523217	0.879	0.622	8.34408e-37	CD8+ T-3	Tnfrsf9
1.01513e-40	0.713685	0.598	0.322	1.78216e-36	CD8+ T-3	Tnfrsf4
3.61017e-39	0.477258	0.905	0.788	6.33802e-35	CD8+ T-3	Vamp8
5.56744e-39	0.371292	0.206	0.044	9.77419e-35	CD8+ T-3	Slc17a6
2.42096e-38	0.395925	0.861	0.723	4.25023e-34	CD8+ T-3	Cd27
2.5516e-38	0.397723	0.564	0.305	4.47959e-34	CD8+ T-3	Kdm2b
2.91406e-38	0.524601	0.877	0.635	5.11592e-34	CD8+ T-3	Irf8
8.45117e-38	0.956565	0.549	0.317	1.48369e-33	CD8+ T-3	Nrgn
4.64042e-37	0.393534	0.257	0.071	8.14671e-33	CD8+ T-3	Tbc1d4
8.76763e-37	0.422243	0.646	0.407	1.53925e-32	CD8+ T-3	Gpr65
2.46977e-36	0.36822	0.949	0.927	4.33593e-32	CD8+ T-3	Nkg7
2.73732e-36	0.322521	0.261	0.077	4.80563e-32	CD8+ T-3	Tnip3
5.36205e-36	0.446491	0.749	0.5	9.41362e-32	CD8+ T-3	Icos
5.82905e-36	0.482114	0.707	0.476	1.02335e-31	CD8+ T-3	Il18r1
1.12759e-35	0.310154	0.919	0.776	1.97959e-31	CD8+ T-3	Fkbp1a
6.68885e-35	0.409638	0.931	0.832	1.17429e-30	CD8+ T-3	Sh2d2a
7.15776e-35	0.34036	0.44	0.203	1.25662e-30	CD8+ T-3	St6galnac3
7.85959e-35	2.07805	0.655	0.488	1.37983e-30	CD8+ T-3	Ccl4
8.56476e-35	0.488985	0.614	0.391	1.50363e-30	CD8+ T-3	Il18rap
1.59849e-34	0.416208	0.836	0.64	2.80631e-30	CD8+ T-3	Hif1a
1.65419e-34	0.357027	0.776	0.556	2.9041e-30	CD8+ T-3	Rilpl2
1.93452e-34	0.448948	0.968	0.897	3.39624e-30	CD8+ T-3	Sub1
1.10932e-32	0.445671	0.895	0.736	1.94752e-28	CD8+ T-3	Ybx3
1.16542e-31	0.398547	0.871	0.719	2.04602e-27	CD8+ T-3	Stat3
1.2463e-31	0.533209	0.893	0.753	2.18801e-27	CD8+ T-3	Klrd1
2.4874e-31	0.342352	0.737	0.512	4.36689e-27	CD8+ T-3	Mdfic
3.76083e-31	0.480188	0.584	0.347	6.60252e-27	CD8+ T-3	Nr4a2
4.3695e-31	0.300864	0.715	0.498	7.6711e-27	CD8+ T-3	Elk3
1.98563e-30	0.334294	0.562	0.334	3.48598e-26	CD8+ T-3	Nfkb2
4.78651e-30	0.460758	0.865	0.711	8.40321e-26	CD8+ T-3	Tgfb1
5.62188e-30	0.292132	0.612	0.391	9.86978e-26	CD8+ T-3	Mrps6
1.55141e-29	0.389821	0.388	0.176	2.72365e-25	CD8+ T-3	Pou2f2
1.6543e-29	0.333922	0.945	0.866	2.90429e-25	CD8+ T-3	Ostf1
1.3049e-27	0.265396	0.416	0.216	2.29088e-23	CD8+ T-3	Phactr2
1.39018e-27	0.229988	0.253	0.087	2.4406e-23	CD8+ T-3	Arl4d
1.83362e-27	0.24071	0.539	0.314	3.2191e-23	CD8+ T-3	Zeb2
8.08722e-27	0.350271	0.543	0.328	1.41979e-22	CD8+ T-3	Nrp1
2.05825e-26	0.551263	0.596	0.436	3.61346e-22	CD8+ T-3	Havcr2
3.33071e-26	0.211055	0.354	0.159	5.84739e-22	CD8+ T-3	Mir155hg
4.87351e-26	0.312804	0.945	0.868	8.55594e-22	CD8+ T-3	Gdi2
7.47757e-26	0.361408	0.891	0.76	1.31276e-21	CD8+ T-3	Tnfrsf18
1.00694e-25	0.347301	0.671	0.469	1.76778e-21	CD8+ T-3	Gm19585
1.57938e-25	0.290555	0.626	0.427	2.77276e-21	CD8+ T-3	Nfkbib
3.55154e-25	0.360404	0.859	0.685	6.23508e-21	CD8+ T-3	Cd82
1.08996e-24	0.302759	0.438	0.247	1.91353e-20	CD8+ T-3	Stx11
1.18938e-24	0.375132	0.82	0.667	2.08808e-20	CD8+ T-3	Klrc1
1.19146e-24	0.21858	0.992	0.953	2.09172e-20	CD8+ T-3	Cd3d
1.43052e-24	0.382436	0.285	0.121	2.51141e-20	CD8+ T-3	Tnfsf11
1.87553e-24	0.356314	0.855	0.738	3.29268e-20	CD8+ T-3	Cst7
1.88107e-24	0.226402	0.984	0.939	3.30241e-20	CD8+ T-3	Cd3e
1.96431e-24	0.275328	0.515	0.306	3.44854e-20	CD8+ T-3	2310001H17Rik
3.91163e-24	0.431565	0.657	0.488	6.86726e-20	CD8+ T-3	Map2k3
9.29133e-24	0.227392	0.713	0.48	1.63119e-19	CD8+ T-3	Nfatc1
3.26028e-23	0.384829	0.784	0.628	5.72374e-19	CD8+ T-3	Nfkb1
5.06364e-23	0.256474	0.622	0.407	8.88972e-19	CD8+ T-3	Zfp36l1
5.71264e-23	0.244308	0.834	0.672	1.00291e-18	CD8+ T-3	2010111I01Rik
6.35641e-23	1.4697	0.366	0.188	1.11593e-18	CD8+ T-3	Xcl1
6.36846e-23	0.358264	0.808	0.637	1.11805e-18	CD8+ T-3	Sla
6.64737e-23	0.149882	0.154	0.041	1.16701e-18	CD8+ T-3	Tg
9.21442e-23	0.27466	0.697	0.509	1.61768e-18	CD8+ T-3	Dgkz
1.59419e-22	0.228051	0.422	0.231	2.79877e-18	CD8+ T-3	Zfpm1
1.60655e-22	0.16836	0.16	0.045	2.82046e-18	CD8+ T-3	Cib2
1.84601e-22	0.216303	0.23	0.086	3.24086e-18	CD8+ T-3	Spry1
1.91381e-22	0.229856	0.325	0.157	3.35988e-18	CD8+ T-3	Irf4
2.5926e-22	0.259581	0.988	0.934	4.55156e-18	CD8+ T-3	Trac
2.6196e-22	0.251877	0.846	0.661	4.59897e-18	CD8+ T-3	Ier2
2.78978e-22	0.36195	0.806	0.667	4.89774e-18	CD8+ T-3	Baz1a
3.40404e-22	0.263149	0.828	0.633	5.97614e-18	CD8+ T-3	St13
6.51712e-22	0.15729	0.164	0.048	1.14415e-17	CD8+ T-3	Sema7a
8.87341e-22	0.242862	0.703	0.508	1.55782e-17	CD8+ T-3	Tnfrsf1b
1.03049e-21	0.305462	0.931	0.794	1.80913e-17	CD8+ T-3	Anxa2
1.35303e-21	0.186609	0.994	0.968	2.37537e-17	CD8+ T-3	Fxyd5
1.48414e-21	0.349099	0.244	0.097	2.60555e-17	CD8+ T-3	Rgcc
1.69798e-21	0.33506	0.626	0.455	2.98097e-17	CD8+ T-3	Batf
1.74957e-21	0.128427	0.16	0.046	3.07155e-17	CD8+ T-3	Ccr8
1.94484e-21	0.249224	0.887	0.825	3.41437e-17	CD8+ T-3	Cd8a
2.38649e-21	0.242853	0.947	0.821	4.18973e-17	CD8+ T-3	2021-09-07
7.85299e-21	0.325668	0.499	0.321	1.37867e-16	CD8+ T-3	Adssl1
8.51718e-21	0.40411	0.945	0.849	1.49528e-16	CD8+ T-3	Ucp2
1.1846e-20	0.206663	0.923	0.815	2.07968e-16	CD8+ T-3	Bsg
1.20544e-20	0.290664	0.931	0.799	2.11627e-16	CD8+ T-3	Cox17
1.2273e-20	0.179859	0.499	0.297	2.15464e-16	CD8+ T-3	Reep3
1.45312e-20	0.258168	0.754	0.558	2.55111e-16	CD8+ T-3	Bhlhe40
1.87918e-20	0.231715	0.966	0.863	3.29909e-16	CD8+ T-3	Ubl5
1.97863e-20	0.20342	0.386	0.21	3.47369e-16	CD8+ T-3	Tgif1
3.82654e-20	0.325468	0.798	0.613	6.71787e-16	CD8+ T-3	Tox
4.26316e-20	0.239969	0.909	0.786	7.4844e-16	CD8+ T-3	Ctsb
5.10498e-20	0.211202	0.954	0.872	8.9623e-16	CD8+ T-3	Dad1
5.3403e-20	0.224141	0.776	0.588	9.37544e-16	CD8+ T-3	Slc1a5
6.98111e-20	0.23418	0.711	0.543	1.2256e-15	CD8+ T-3	Agfg1
7.57351e-20	0.2264	0.743	0.548	1.32961e-15	CD8+ T-3	Ciapin1
9.64864e-20	0.255841	0.485	0.306	1.69392e-15	CD8+ T-3	Sdcbp2
1.70676e-19	0.261932	0.457	0.292	2.99638e-15	CD8+ T-3	Gch1
2.40527e-19	0.171077	0.436	0.256	4.22269e-15	CD8+ T-3	Wsb2
3.17089e-19	0.245296	0.954	0.826	5.56681e-15	CD8+ T-3	Cxcr6
3.53194e-19	0.217124	0.501	0.322	6.20068e-15	CD8+ T-3	Trps1
3.92169e-19	0.228376	0.992	0.955	6.88493e-15	CD8+ T-3	Gapdh
5.08439e-19	0.239409	0.822	0.696	8.92616e-15	CD8+ T-3	Vmp1
5.13121e-19	0.318609	0.6	0.422	9.00835e-15	CD8+ T-3	Plscr1
5.4376e-19	0.23973	0.715	0.53	9.54626e-15	CD8+ T-3	Plek
5.77192e-19	0.235824	0.954	0.875	1.01332e-14	CD8+ T-3	Myl12a
1.16863e-18	0.307926	0.986	0.957	2.05164e-14	CD8+ T-3	Srgn
1.21881e-18	0.241735	0.535	0.376	2.13974e-14	CD8+ T-3	Acot9
1.36924e-18	0.456246	0.477	0.296	2.40383e-14	CD8+ T-3	Serpinb6b
1.45113e-18	0.277632	0.713	0.547	2.54761e-14	CD8+ T-3	Fam162a
2.15126e-18	0.134841	0.315	0.155	3.77676e-14	CD8+ T-3	Foxp4
2.51146e-18	0.274645	0.687	0.532	4.40912e-14	CD8+ T-3	Nfat5
3.32205e-18	0.260862	0.871	0.743	5.83219e-14	CD8+ T-3	Usmg5
4.624e-18	0.305021	0.453	0.289	8.1179e-14	CD8+ T-3	Rel
5.06587e-18	0.168526	0.244	0.105	8.89364e-14	CD8+ T-3	Izumo1r
6.40907e-18	0.226243	0.737	0.557	1.12518e-13	CD8+ T-3	Plp2
6.49388e-18	0.20913	0.905	0.855	1.14007e-13	CD8+ T-3	Cd53
8.19975e-18	0.210562	0.871	0.754	1.43955e-13	CD8+ T-3	Cyth4
1.0947e-17	0.247375	0.539	0.381	1.92185e-13	CD8+ T-3	Btg3
1.70881e-17	0.191714	0.638	0.46	2.99998e-13	CD8+ T-3	Arid5b
2.14724e-17	0.625721	0.764	0.622	3.76969e-13	CD8+ T-3	Prf1
2.70187e-17	0.167051	0.392	0.226	4.7434e-13	CD8+ T-3	Rnf19a
3.12558e-17	0.104929	0.182	0.066	5.48726e-13	CD8+ T-3	Bach2
3.17751e-17	0.20121	0.172	0.061	5.57844e-13	CD8+ T-3	Tnfsf14
4.27692e-17	0.325441	0.745	0.61	7.50856e-13	CD8+ T-3	Klrk1
4.58631e-17	0.264235	0.677	0.508	8.05172e-13	CD8+ T-3	Spag9
4.85979e-17	0.186863	0.444	0.275	8.53185e-13	CD8+ T-3	Relb
4.95934e-17	0.206357	0.709	0.547	8.70662e-13	CD8+ T-3	Anxa5
5.14636e-17	0.142948	0.261	0.124	9.03495e-13	CD8+ T-3	Ptger2
6.75139e-17	0.163641	0.786	0.638	1.18527e-12	CD8+ T-3	Sat1
8.577e-17	0.210822	0.804	0.641	1.50578e-12	CD8+ T-3	Cd44
8.66789e-17	0.27505	0.644	0.486	1.52173e-12	CD8+ T-3	Nrip1
8.94657e-17	0.166404	0.653	0.48	1.57066e-12	CD8+ T-3	Timm17b
9.28367e-17	0.214601	0.471	0.314	1.62984e-12	CD8+ T-3	Mmd
1.19321e-16	0.222507	0.655	0.492	2.0948e-12	CD8+ T-3	Foxn3
1.46348e-16	0.190462	0.859	0.717	2.56928e-12	CD8+ T-3	Ostc
1.58717e-16	0.201011	0.943	0.849	2.78644e-12	CD8+ T-3	Ptpn22
1.61898e-16	0.237595	0.289	0.15	2.84227e-12	CD8+ T-3	Sv2c
2.67751e-16	0.206139	0.911	0.808	4.70064e-12	CD8+ T-3	Uqcrq
4.0943e-16	0.207904	0.891	0.784	7.18795e-12	CD8+ T-3	Ost4
4.26496e-16	0.200799	0.792	0.672	7.48756e-12	CD8+ T-3	Chic2
5.11866e-16	0.129226	0.164	0.06	8.98633e-12	CD8+ T-3	4833407H14Rik
6.25698e-16	0.43781	0.313	0.173	1.09848e-11	CD8+ T-3	Igfbp7
6.89795e-16	0.346614	0.838	0.682	1.211e-11	CD8+ T-3	Capg
1.49996e-15	0.238432	0.895	0.815	2.63332e-11	CD8+ T-3	B4galnt1
1.58975e-15	0.177425	0.832	0.712	2.79097e-11	CD8+ T-3	Ptpn1
2.24511e-15	0.175604	0.907	0.797	3.94152e-11	CD8+ T-3	Srp14
2.5943e-15	0.156372	0.705	0.548	4.55456e-11	CD8+ T-3	Tmem208
2.80181e-15	0.148913	0.248	0.122	4.91885e-11	CD8+ T-3	Tacc2
3.02894e-15	0.187043	0.851	0.713	5.31761e-11	CD8+ T-3	Ywhab
3.27164e-15	0.192532	0.343	0.199	5.74369e-11	CD8+ T-3	Ptch1
3.41063e-15	0.114775	0.186	0.075	5.98771e-11	CD8+ T-3	Galm
3.65427e-15	0.153255	0.469	0.311	6.41543e-11	CD8+ T-3	Tm2d3
4.13148e-15	0.239593	0.774	0.665	7.25323e-11	CD8+ T-3	Traf1
4.28845e-15	0.229498	0.939	0.883	7.5288e-11	CD8+ T-3	Psme2
4.30753e-15	0.19197	0.796	0.659	7.56231e-11	CD8+ T-3	Nt5c
4.36504e-15	0.195068	0.293	0.159	7.66326e-11	CD8+ T-3	Slc37a2
5.19668e-15	0.138324	0.236	0.112	9.12329e-11	CD8+ T-3	Gtdc1
5.8968e-15	0.23933	0.869	0.745	1.03524e-10	CD8+ T-3	Dusp2
6.68931e-15	0.390644	0.531	0.376	1.17438e-10	CD8+ T-3	Serpinb9
6.87123e-15	0.224315	0.614	0.479	1.20631e-10	CD8+ T-3	Ubr5
7.13745e-15	0.205643	0.382	0.24	1.25305e-10	CD8+ T-3	Prelid2
8.19853e-15	0.135437	0.287	0.149	1.43933e-10	CD8+ T-3	Adamts6
8.95859e-15	0.199793	0.737	0.585	1.57277e-10	CD8+ T-3	Mrpl4
9.5239e-15	0.173716	0.313	0.167	1.67202e-10	CD8+ T-3	Slamf1
9.99293e-15	0.194027	0.675	0.518	1.75436e-10	CD8+ T-3	Mapkapk2
1.21617e-14	0.21041	0.327	0.192	2.1351e-10	CD8+ T-3	Gm17745
2.50427e-14	0.108613	0.194	0.084	4.3965e-10	CD8+ T-3	Fam214b
2.94479e-14	0.212135	0.715	0.589	5.16988e-10	CD8+ T-3	Rhof
2.96381e-14	0.179047	0.669	0.522	5.20327e-10	CD8+ T-3	Gpr68
3.34456e-14	0.159177	0.37	0.226	5.8717e-10	CD8+ T-3	Stat5a
7.28703e-14	0.234274	0.372	0.239	1.27931e-09	CD8+ T-3	Pdcd1lg2
7.67223e-14	0.206871	0.754	0.609	1.34694e-09	CD8+ T-3	Itm2c
9.02584e-14	0.166451	0.325	0.195	1.58458e-09	CD8+ T-3	Rida
9.97033e-14	0.175143	0.905	0.796	1.75039e-09	CD8+ T-3	Selenok
1.17429e-13	0.207028	0.299	0.173	2.06158e-09	CD8+ T-3	Ece1
1.27926e-13	0.160262	0.562	0.421	2.24587e-09	CD8+ T-3	Trim8
1.48001e-13	0.207893	0.246	0.124	2.5983e-09	CD8+ T-3	Timp2
1.53984e-13	0.176806	0.883	0.76	2.70334e-09	CD8+ T-3	Psmb5
1.5868e-13	0.196306	0.578	0.428	2.78579e-09	CD8+ T-3	Crem
2.11316e-13	0.206729	0.828	0.691	3.70986e-09	CD8+ T-3	Ndufs6
2.29381e-13	0.175272	0.265	0.137	4.02702e-09	CD8+ T-3	Tagap
2.88718e-13	0.159832	0.657	0.504	5.06874e-09	CD8+ T-3	Runx2
3.03804e-13	0.185255	0.848	0.744	5.33359e-09	CD8+ T-3	Paip2
3.37709e-13	0.176025	0.729	0.584	5.92881e-09	CD8+ T-3	Cblb
4.15599e-13	0.155536	0.966	0.893	7.29626e-09	CD8+ T-3	Arpc3
4.27868e-13	0.163632	0.477	0.339	7.51165e-09	CD8+ T-3	Stx6
5.47735e-13	0.180432	0.883	0.772	9.61603e-09	CD8+ T-3	Slc25a4
5.62921e-13	0.181666	0.376	0.237	9.88265e-09	CD8+ T-3	Adora2a
6.01748e-13	0.197154	0.923	0.833	1.05643e-08	CD8+ T-3	Dynll1
6.95355e-13	0.16556	0.952	0.86	1.22077e-08	CD8+ T-3	Sec61g
7.77116e-13	0.238371	0.574	0.441	1.3643e-08	CD8+ T-3	Dusp5
7.84063e-13	0.15224	0.889	0.797	1.3765e-08	CD8+ T-3	Map1lc3b
8.77039e-13	0.170301	0.966	0.88	1.53973e-08	CD8+ T-3	Elob
8.81573e-13	0.520628	0.18	0.081	1.54769e-08	CD8+ T-3	Il1r2
1.12546e-12	0.179857	0.735	0.602	1.97586e-08	CD8+ T-3	Il21r
1.40277e-12	0.138596	0.689	0.55	2.4627e-08	CD8+ T-3	Ergic3
1.72951e-12	0.167013	0.463	0.327	3.03633e-08	CD8+ T-3	Gpr174
1.7525e-12	0.142267	0.473	0.324	3.07669e-08	CD8+ T-3	Mxi1
1.97194e-12	0.183596	0.824	0.711	3.46195e-08	CD8+ T-3	Vcp
1.98233e-12	0.190122	0.251	0.138	3.48018e-08	CD8+ T-3	Nmrk1
2.05843e-12	0.20689	0.691	0.569	3.61378e-08	CD8+ T-3	Pold4
2.09009e-12	0.126653	0.541	0.387	3.66936e-08	CD8+ T-3	Tnfaip3
2.16026e-12	0.314628	0.289	0.165	3.79255e-08	CD8+ T-3	Gadd45b
2.85523e-12	0.179326	0.857	0.737	5.01264e-08	CD8+ T-3	Uqcr11
2.94975e-12	0.173015	0.331	0.204	5.17859e-08	CD8+ T-3	Plk3
3.06893e-12	0.187984	0.812	0.667	5.38781e-08	CD8+ T-3	Arf6
3.37492e-12	0.148525	0.802	0.686	5.92501e-08	CD8+ T-3	Lrp10
3.45218e-12	0.194841	0.984	0.939	6.06064e-08	CD8+ T-3	Trbc2
3.70004e-12	0.131903	0.6	0.457	6.4958e-08	CD8+ T-3	Xbp1
4.50354e-12	0.175992	0.871	0.795	7.90642e-08	CD8+ T-3	Fis1
5.34011e-12	0.151648	0.933	0.822	9.3751e-08	CD8+ T-3	Arf1
5.4502e-12	0.329176	0.168	0.075	9.56838e-08	CD8+ T-3	Serpine2
6.08682e-12	0.116488	0.218	0.108	1.0686e-07	CD8+ T-3	Fas
6.65776e-12	0.154429	0.945	0.857	1.16884e-07	CD8+ T-3	Gabarap
7.55472e-12	0.132288	0.756	0.617	1.32631e-07	CD8+ T-3	Glmp
7.62271e-12	0.165217	0.792	0.648	1.33824e-07	CD8+ T-3	Ppp1r16b
8.03551e-12	0.194808	0.657	0.504	1.41071e-07	CD8+ T-3	Itgav
8.82614e-12	0.199512	0.279	0.163	1.54952e-07	CD8+ T-3	Hivep3
9.54084e-12	0.129292	0.681	0.559	1.67499e-07	CD8+ T-3	Selenos
1.0226e-11	0.136603	0.834	0.708	1.79528e-07	CD8+ T-3	Spcs1
1.12072e-11	0.145425	0.372	0.227	1.96754e-07	CD8+ T-3	Ms4a4c
1.17084e-11	0.171552	0.802	0.675	2.05553e-07	CD8+ T-3	Crlf2
1.19104e-11	0.142769	0.402	0.273	2.091e-07	CD8+ T-3	Arl3
1.3059e-11	0.213288	0.762	0.653	2.29263e-07	CD8+ T-3	Smap2
1.56326e-11	0.152847	0.994	0.953	2.74446e-07	CD8+ T-3	Rpl34
1.6491e-11	0.165764	0.582	0.448	2.89516e-07	CD8+ T-3	Nsmaf
1.83838e-11	0.130715	0.741	0.613	3.22747e-07	CD8+ T-3	Vgll4
1.86087e-11	0.157416	0.812	0.686	3.26695e-07	CD8+ T-3	Chd4
1.87964e-11	0.160457	0.762	0.629	3.2999e-07	CD8+ T-3	Cops6
2.33613e-11	0.172276	0.683	0.568	4.10132e-07	CD8+ T-3	Ddt
2.72248e-11	0.145556	0.455	0.312	4.77959e-07	CD8+ T-3	Gna15
2.76269e-11	0.153687	0.937	0.839	4.85017e-07	CD8+ T-3	Edf1
3.00136e-11	0.137058	0.275	0.165	5.26919e-07	CD8+ T-3	Supt3
3.17619e-11	0.246845	0.539	0.408	5.57611e-07	CD8+ T-3	Bcl2l11
3.54531e-11	0.245237	0.255	0.143	6.22414e-07	CD8+ T-3	Kdm6b
3.91704e-11	0.187881	0.446	0.318	6.87675e-07	CD8+ T-3	Nt5e
4.74337e-11	0.140758	0.43	0.304	8.32746e-07	CD8+ T-3	Gm45716
5.06752e-11	0.217827	0.681	0.548	8.89654e-07	CD8+ T-3	Adgre5
5.10574e-11	0.135314	0.382	0.262	8.96364e-07	CD8+ T-3	Fdxr
5.47225e-11	0.139127	0.869	0.762	9.60707e-07	CD8+ T-3	Selenof
6.08427e-11	0.131027	0.988	0.954	1.06815e-06	CD8+ T-3	Eif1
7.09817e-11	0.12321	0.303	0.189	1.24615e-06	CD8+ T-3	Galnt3
9.34671e-11	0.157759	0.822	0.709	1.64091e-06	CD8+ T-3	Fyn
9.42892e-11	0.191643	0.762	0.668	1.65534e-06	CD8+ T-3	Wipf1
9.74767e-11	0.139011	0.707	0.574	1.7113e-06	CD8+ T-3	Clint1
9.83308e-11	0.207701	0.329	0.221	1.7263e-06	CD8+ T-3	Twsg1
9.93822e-11	0.167688	0.778	0.661	1.74475e-06	CD8+ T-3	Glud1
1.14737e-10	0.132977	0.255	0.149	2.01433e-06	CD8+ T-3	Fam213a
1.2634e-10	0.152166	0.901	0.828	2.21802e-06	CD8+ T-3	Slfn2
1.36874e-10	0.260977	0.731	0.656	2.40296e-06	CD8+ T-3	Sh2d1a
1.43928e-10	0.132196	0.531	0.399	2.52679e-06	CD8+ T-3	Prkca
1.77041e-10	0.172276	0.804	0.694	3.10812e-06	CD8+ T-3	Dctn3
1.77414e-10	0.148976	0.463	0.341	3.11467e-06	CD8+ T-3	Acsl4
1.95977e-10	0.136424	0.491	0.368	3.44056e-06	CD8+ T-3	Raf1
2.21395e-10	0.136674	0.887	0.762	3.88681e-06	CD8+ T-3	Ndufb8
2.25684e-10	0.148484	0.646	0.519	3.96212e-06	CD8+ T-3	1110008P14Rik
2.28994e-10	0.124496	0.39	0.269	4.02022e-06	CD8+ T-3	9130401M01Rik
2.33723e-10	0.185326	0.224	0.121	4.10324e-06	CD8+ T-3	Ramp1
2.62022e-10	0.141077	0.612	0.484	4.60005e-06	CD8+ T-3	Chst12
2.65336e-10	0.141404	0.313	0.2	4.65824e-06	CD8+ T-3	Mkrn2
2.73221e-10	0.148232	0.495	0.371	4.79667e-06	CD8+ T-3	Tbl1x
2.82857e-10	0.184208	0.57	0.453	4.96585e-06	CD8+ T-3	Rnf149
2.97008e-10	0.146588	0.586	0.445	5.21427e-06	CD8+ T-3	Il10ra
3.05498e-10	0.11637	0.723	0.593	5.36333e-06	CD8+ T-3	Atp1a1
3.22548e-10	0.12453	0.923	0.849	5.66265e-06	CD8+ T-3	Rap1b
3.46443e-10	0.142769	0.343	0.229	6.08215e-06	CD8+ T-3	Tesk1
3.47653e-10	0.100145	0.255	0.145	6.10339e-06	CD8+ T-3	Stard10
4.18331e-10	0.121031	0.566	0.433	7.34422e-06	CD8+ T-3	Trpv2
4.24234e-10	0.112212	0.473	0.347	7.44786e-06	CD8+ T-3	Agpat4
5.29875e-10	0.10086	0.321	0.206	9.30249e-06	CD8+ T-3	Lyrm2
6.17704e-10	0.127297	0.277	0.171	1.08444e-05	CD8+ T-3	Setbp1
6.2091e-10	0.189532	0.848	0.743	1.09007e-05	CD8+ T-3	Ndufa11
6.41044e-10	0.153978	0.582	0.444	1.12542e-05	CD8+ T-3	Ssbp3
6.90406e-10	0.140511	0.261	0.159	1.21208e-05	CD8+ T-3	Ints4
7.26063e-10	0.148335	0.954	0.862	1.27468e-05	CD8+ T-3	Atp5j
7.47678e-10	0.131076	0.711	0.586	1.31262e-05	CD8+ T-3	Rabgap1l
8.00252e-10	0.146879	0.943	0.871	1.40492e-05	CD8+ T-3	Gng5
8.02163e-10	0.127417	0.446	0.326	1.40828e-05	CD8+ T-3	Mphosph6
8.0772e-10	0.130293	0.479	0.357	1.41803e-05	CD8+ T-3	Inpp5b
8.4244e-10	0.201665	0.38	0.248	1.47899e-05	CD8+ T-3	Rora
8.48204e-10	0.133119	0.768	0.667	1.48911e-05	CD8+ T-3	BC031181
8.58767e-10	0.130367	0.313	0.206	1.50765e-05	CD8+ T-3	Ergic1
9.06957e-10	0.124121	0.317	0.201	1.59225e-05	CD8+ T-3	Casp4
9.11851e-10	0.129787	0.881	0.764	1.60085e-05	CD8+ T-3	Ppp2ca
9.52643e-10	0.10008	0.246	0.144	1.67246e-05	CD8+ T-3	Smox
9.63253e-10	0.142344	0.947	0.887	1.69109e-05	CD8+ T-3	Myl12b
1.05074e-09	0.105616	0.265	0.157	1.84469e-05	CD8+ T-3	Lysmd2
1.42446e-09	0.134825	0.319	0.214	2.50078e-05	CD8+ T-3	Suox
1.57502e-09	0.143019	0.958	0.916	2.7651e-05	CD8+ T-3	Aldoa
1.66276e-09	0.142927	0.659	0.533	2.91913e-05	CD8+ T-3	Isy1
1.69564e-09	0.126647	0.529	0.404	2.97686e-05	CD8+ T-3	Gm2a
1.70098e-09	0.154834	0.97	0.903	2.98625e-05	CD8+ T-3	Pkm
1.73854e-09	0.158433	0.76	0.658	3.05218e-05	CD8+ T-3	Rab10
1.7457e-09	0.161187	0.756	0.628	3.06476e-05	CD8+ T-3	Bin1
1.839e-09	0.151488	0.602	0.491	3.22855e-05	CD8+ T-3	Eif4e
1.93847e-09	0.157978	0.958	0.855	3.40317e-05	CD8+ T-3	S100a11
2.09448e-09	0.147293	0.764	0.638	3.67707e-05	CD8+ T-3	Ndufc1
2.12268e-09	0.166037	0.863	0.751	3.72657e-05	CD8+ T-3	Pebp1
2.21906e-09	0.147519	0.402	0.287	3.89579e-05	CD8+ T-3	Hivep2
2.34267e-09	0.175247	0.984	0.922	4.11279e-05	CD8+ T-3	Ldha
2.40803e-09	0.126578	0.372	0.257	4.22754e-05	CD8+ T-3	Zfp560
2.44418e-09	0.145552	0.79	0.672	4.291e-05	CD8+ T-3	Csk
2.83843e-09	0.146603	0.679	0.58	4.98314e-05	CD8+ T-3	Chmp5
2.97613e-09	0.128929	0.683	0.58	5.2249e-05	CD8+ T-3	Trappc4
3.29716e-09	0.131173	0.301	0.192	5.78849e-05	CD8+ T-3	Smpdl3b
3.48895e-09	0.149014	0.861	0.736	6.1252e-05	CD8+ T-3	Psmb6
3.55871e-09	0.197988	0.893	0.767	6.24768e-05	CD8+ T-3	Cycs
3.90045e-09	0.107587	0.424	0.307	6.84764e-05	CD8+ T-3	Dap3
4.29889e-09	0.121006	0.741	0.631	7.54712e-05	CD8+ T-3	Cstb
4.32559e-09	0.171698	0.887	0.776	7.594e-05	CD8+ T-3	Atp5g1
5.39539e-09	0.157191	0.733	0.612	9.47214e-05	CD8+ T-3	Slc25a11
5.49227e-09	0.149559	0.251	0.153	9.64223e-05	CD8+ T-3	Prr5l
5.68833e-09	0.108776	0.756	0.646	9.98644e-05	CD8+ T-3	Lcp2
5.90819e-09	0.212001	0.96	0.896	0.000103724	CD8+ T-3	Jund
6.24422e-09	0.101652	0.562	0.431	0.000109623	CD8+ T-3	Vps54
6.52952e-09	0.109833	0.309	0.204	0.000114632	CD8+ T-3	Fbxo11
7.00055e-09	0.146402	0.352	0.244	0.000122902	CD8+ T-3	Itm2a
7.00616e-09	0.123666	0.487	0.375	0.000123	CD8+ T-3	Eif4enif1
7.67852e-09	0.235569	0.313	0.212	0.000134804	CD8+ T-3	Il2ra
7.7343e-09	0.213869	0.382	0.276	0.000135783	CD8+ T-3	Ttc39c
8.08249e-09	0.125288	0.592	0.494	0.000141896	CD8+ T-3	Copz1
8.10123e-09	0.177749	0.592	0.494	0.000142225	CD8+ T-3	Fam3c
8.10892e-09	0.145239	0.877	0.773	0.00014236	CD8+ T-3	Tmem258
8.79522e-09	0.142242	0.739	0.65	0.000154409	CD8+ T-3	Pura
9.1891e-09	0.165346	0.691	0.587	0.000161324	CD8+ T-3	Otulin
9.78774e-09	0.113191	0.414	0.303	0.000171834	CD8+ T-3	Xpnpep1
9.89929e-09	0.148953	0.907	0.84	0.000173792	CD8+ T-3	Prkar1a
1.00709e-08	0.132909	0.851	0.753	0.000176805	CD8+ T-3	Atox1
1.07281e-08	0.113985	0.459	0.345	0.000188342	CD8+ T-3	Rapgef1
1.17578e-08	0.109302	0.234	0.141	0.000206419	CD8+ T-3	Farp1
1.25465e-08	0.216743	0.392	0.299	0.000220267	CD8+ T-3	Oxsr1
1.26833e-08	0.163565	0.636	0.539	0.000222668	CD8+ T-3	Sirt2
1.36498e-08	0.168478	0.36	0.26	0.000239635	CD8+ T-3	Snx9
1.41686e-08	0.100477	0.491	0.376	0.000248744	CD8+ T-3	Spcs3
1.45628e-08	0.162693	0.655	0.529	0.000255664	CD8+ T-3	Stk39
1.51287e-08	0.105156	0.677	0.568	0.000265599	CD8+ T-3	Aamp
1.55383e-08	0.123281	0.964	0.907	0.000272791	CD8+ T-3	Chchd2
1.59831e-08	0.131086	0.453	0.348	0.000280599	CD8+ T-3	Gnl1
1.62874e-08	0.107822	0.616	0.51	0.000285941	CD8+ T-3	Kcnn4
1.71425e-08	0.106842	0.659	0.526	0.000300954	CD8+ T-3	Osbpl3
1.76125e-08	0.221281	0.535	0.442	0.000309205	CD8+ T-3	Ap3b1
1.87265e-08	0.104561	0.291	0.187	0.000328762	CD8+ T-3	Dusp10
1.88532e-08	0.155177	0.493	0.38	0.000330987	CD8+ T-3	Arap2
1.97425e-08	0.118037	0.976	0.942	0.000346599	CD8+ T-3	Oaz1
2.00018e-08	0.137227	0.784	0.673	0.000351152	CD8+ T-3	Ghitm
2.02725e-08	0.121797	0.398	0.285	0.000355904	CD8+ T-3	Itpr1
2.06591e-08	0.144634	0.802	0.69	0.000362691	CD8+ T-3	Pdcd5
2.17516e-08	0.126791	0.81	0.68	0.000381871	CD8+ T-3	Ccnd2
2.23056e-08	0.109998	0.806	0.679	0.000391597	CD8+ T-3	Ndufs5
2.32733e-08	0.125982	0.491	0.38	0.000408586	CD8+ T-3	Ubxn6
2.48841e-08	0.135324	0.77	0.665	0.000436865	CD8+ T-3	Tprgl
2.49825e-08	0.11913	0.663	0.567	0.000438593	CD8+ T-3	Mlf2
2.5192e-08	0.138881	0.683	0.571	0.00044227	CD8+ T-3	Polr2k
2.64325e-08	0.108544	0.356	0.248	0.000464049	CD8+ T-3	Nt5dc1
2.6456e-08	0.130416	0.612	0.491	0.000464461	CD8+ T-3	Gtpbp4
2.7298e-08	0.199054	0.844	0.763	0.000479243	CD8+ T-3	Mdh1
2.77207e-08	0.128294	0.735	0.624	0.000486665	CD8+ T-3	Nfkbia
2.77588e-08	0.137899	0.735	0.617	0.000487334	CD8+ T-3	Erp44
2.94011e-08	0.123471	0.842	0.763	0.000516167	CD8+ T-3	Gabarapl2
3.40855e-08	0.131895	0.895	0.82	0.000598405	CD8+ T-3	Atp6v1f
3.53657e-08	0.173929	0.614	0.507	0.00062088	CD8+ T-3	Cd74
3.62434e-08	0.148304	0.913	0.848	0.00063629	CD8+ T-3	Arpc5
4.13139e-08	0.131057	0.752	0.641	0.000725307	CD8+ T-3	Sh3kbp1
4.42046e-08	0.140333	0.933	0.841	0.000776056	CD8+ T-3	Cox7a2
4.52273e-08	0.141395	0.851	0.743	0.000794011	CD8+ T-3	Rwdd1
4.89978e-08	0.160873	0.818	0.709	0.000860206	CD8+ T-3	Pglyrp1
4.93253e-08	0.119367	0.505	0.399	0.000865955	CD8+ T-3	Hnrnpll
5.61713e-08	0.167722	0.972	0.911	0.000986144	CD8+ T-3	Lgals1
5.65004e-08	0.112677	0.836	0.724	0.000991921	CD8+ T-3	Tmem160
5.77012e-08	0.108458	0.782	0.679	0.001013	CD8+ T-3	Txndc17
5.88306e-08	0.105252	0.749	0.642	0.00103283	CD8+ T-3	Cast
6.05048e-08	0.108036	0.651	0.541	0.00106222	CD8+ T-3	Acaa1a
6.06714e-08	0.1059	0.372	0.27	0.00106515	CD8+ T-3	Ppip5k2
6.09345e-08	0.127701	0.432	0.331	0.00106977	CD8+ T-3	Bcor
6.29518e-08	0.131036	0.515	0.405	0.00110518	CD8+ T-3	Map2k1
6.38646e-08	0.311218	0.24	0.15	0.00112121	CD8+ T-3	Tnf
6.53405e-08	0.118853	0.691	0.592	0.00114712	CD8+ T-3	Atxn1
6.63497e-08	0.143695	0.279	0.19	0.00116484	CD8+ T-3	Fam110a
6.78499e-08	0.125565	0.764	0.648	0.00119117	CD8+ T-3	Vps29
6.81778e-08	0.354223	0.271	0.182	0.00119693	CD8+ T-3	Crtam
6.84008e-08	0.122368	0.956	0.876	0.00120084	CD8+ T-3	Capzb
6.88076e-08	0.115466	0.895	0.832	0.00120799	CD8+ T-3	Limd2
6.89057e-08	0.153863	0.56	0.442	0.00120971	CD8+ T-3	Golga4
7.02422e-08	0.143809	0.642	0.541	0.00123317	CD8+ T-3	Cetn2
7.47616e-08	0.150137	0.758	0.651	0.00131251	CD8+ T-3	Rrp1
7.52164e-08	0.11625	0.638	0.514	0.0013205	CD8+ T-3	Psmd6
7.93448e-08	0.148339	0.232	0.143	0.00139298	CD8+ T-3	Csf1
8.33543e-08	0.10723	0.578	0.475	0.00146337	CD8+ T-3	Rab1b
9.03039e-08	0.118594	0.889	0.785	0.00158538	CD8+ T-3	Mrpl52
9.03144e-08	0.11969	0.455	0.347	0.00158556	CD8+ T-3	Jarid2
9.07961e-08	0.138127	0.347	0.254	0.00159402	CD8+ T-3	Fhl2
9.41153e-08	0.150244	0.424	0.325	0.00165229	CD8+ T-3	Endod1
9.55263e-08	0.124359	0.958	0.881	0.00167706	CD8+ T-3	Tma7
9.98135e-08	0.157865	0.703	0.606	0.00175233	CD8+ T-3	D16Ertd472e
1.05358e-07	0.136952	0.392	0.293	0.00184967	CD8+ T-3	Sdhaf1
1.07244e-07	0.10221	0.885	0.804	0.00188277	CD8+ T-3	Sec62
1.08934e-07	0.101046	0.277	0.184	0.00191244	CD8+ T-3	Sgpl1
1.0921e-07	0.135346	0.57	0.457	0.0019173	CD8+ T-3	Polr2l
1.15183e-07	0.10795	0.356	0.256	0.00202215	CD8+ T-3	Pitpnm2
1.19117e-07	0.109339	0.867	0.757	0.00209122	CD8+ T-3	Cst3
1.19591e-07	0.129296	0.794	0.664	0.00209953	CD8+ T-3	Litaf
1.28381e-07	0.151039	0.871	0.764	0.00225386	CD8+ T-3	Eif3c
1.44097e-07	0.10574	0.824	0.722	0.00252976	CD8+ T-3	Stk24
1.4776e-07	0.121937	0.725	0.611	0.00259408	CD8+ T-3	Ndufb6
1.50074e-07	0.127938	0.531	0.437	0.0026347	CD8+ T-3	Plekhb2
1.52123e-07	0.101629	0.63	0.52	0.00267067	CD8+ T-3	Znrd1
1.54373e-07	0.161222	0.582	0.483	0.00271018	CD8+ T-3	Mif4gd
1.54719e-07	0.118962	0.83	0.727	0.00271625	CD8+ T-3	Brk1
1.66595e-07	0.146025	0.885	0.776	0.00292474	CD8+ T-3	Nol7
1.76115e-07	0.126941	0.931	0.885	0.00309187	CD8+ T-3	Gimap1
1.85455e-07	0.118034	0.949	0.886	0.00325584	CD8+ T-3	Atp5l
1.90324e-07	0.111944	0.374	0.276	0.00334133	CD8+ T-3	Epb41l2
1.96251e-07	0.139625	0.828	0.734	0.00344539	CD8+ T-3	Ube2m
1.97322e-07	0.134265	0.485	0.392	0.00346419	CD8+ T-3	Tank
2.00839e-07	0.128882	0.677	0.578	0.00352592	CD8+ T-3	Tmem126a
2.03434e-07	0.130765	0.497	0.404	0.00357149	CD8+ T-3	Arf3
2.14486e-07	0.104148	0.149	0.081	0.00376552	CD8+ T-3	Ptpn5
2.18298e-07	0.137193	0.364	0.276	0.00383245	CD8+ T-3	Hccs
2.30562e-07	0.112769	0.869	0.791	0.00404774	CD8+ T-3	D8Ertd738e
2.73676e-07	0.118719	0.964	0.901	0.00480465	CD8+ T-3	Cox7c
2.7424e-07	0.107067	0.305	0.211	0.00481455	CD8+ T-3	Otud7b
2.74855e-07	0.120488	0.469	0.37	0.00482535	CD8+ T-3	Dnmt3a
2.74898e-07	0.129758	0.798	0.711	0.00482611	CD8+ T-3	Sin3b
2.76588e-07	0.108619	0.337	0.244	0.00485577	CD8+ T-3	Hmces
2.80255e-07	0.100319	0.36	0.259	0.00492016	CD8+ T-3	Plekha3
2.8977e-07	0.115685	0.743	0.648	0.0050872	CD8+ T-3	Ndufv2
2.96415e-07	0.115107	0.564	0.45	0.00520386	CD8+ T-3	Klrc2
2.99672e-07	0.137423	0.786	0.68	0.00526104	CD8+ T-3	Ndufb4
3.02579e-07	0.105523	0.77	0.658	0.00531208	CD8+ T-3	Rnh1
3.09284e-07	0.100037	0.251	0.166	0.00542978	CD8+ T-3	Bmi1
3.14464e-07	0.10192	0.657	0.547	0.00552072	CD8+ T-3	Ift20
3.322e-07	0.109944	0.614	0.514	0.00583209	CD8+ T-3	Max
3.60624e-07	0.155879	0.655	0.548	0.00633112	CD8+ T-3	Pcmt1
3.75976e-07	0.108102	0.149	0.082	0.00660063	CD8+ T-3	Utf1
3.78302e-07	0.145521	0.592	0.478	0.00664147	CD8+ T-3	Mlec
3.98952e-07	0.152196	0.335	0.235	0.007004	CD8+ T-3	Cd9
4.03807e-07	0.112496	0.693	0.601	0.00708924	CD8+ T-3	Hsbp1
4.11053e-07	0.110582	0.939	0.841	0.00721644	CD8+ T-3	Reep5
4.22619e-07	0.118862	0.871	0.801	0.00741949	CD8+ T-3	Kmt2e
4.34002e-07	0.131312	0.859	0.758	0.00761934	CD8+ T-3	Ndufa1
4.46898e-07	0.107328	0.949	0.899	0.00784574	CD8+ T-3	Uqcrh
4.59676e-07	0.103377	0.37	0.275	0.00807007	CD8+ T-3	Atg16l2
4.73525e-07	0.118662	0.901	0.812	0.00831321	CD8+ T-3	Nedd8
5.27487e-07	0.110868	0.426	0.326	0.00926057	CD8+ T-3	Ap1s2
5.32708e-07	0.273611	0.893	0.81	0.00935222	CD8+ T-3	Ifi27l2a
5.67905e-07	0.141219	0.22	0.136	0.00997014	CD8+ T-3	Lta
5.69769e-07	0.117319	0.59	0.493	0.0100029	CD8+ T-3	Zmat5
5.73946e-07	0.164948	0.394	0.305	0.0100762	CD8+ T-3	Abhd12
5.91418e-07	0.146683	0.547	0.452	0.0103829	CD8+ T-3	Txnl4a
6.26729e-07	0.105538	0.893	0.821	0.0110028	CD8+ T-3	Chmp4b
6.26997e-07	0.132666	0.281	0.191	0.0110076	CD8+ T-3	Cd200
7.46602e-07	0.171657	0.463	0.359	0.0131073	CD8+ T-3	Ctla4
7.9377e-07	0.106133	0.408	0.319	0.0139354	CD8+ T-3	Fam174a
8.42101e-07	0.132499	0.982	0.941	0.0147839	CD8+ T-3	Rps26
8.54016e-07	0.135736	0.669	0.569	0.0149931	CD8+ T-3	Hsd17b10
8.54815e-07	0.127804	0.861	0.769	0.0150071	CD8+ T-3	Ssb
8.76366e-07	0.139926	0.404	0.311	0.0153855	CD8+ T-3	Ankra2
8.88108e-07	0.114997	0.485	0.386	0.0155916	CD8+ T-3	Fam169b
9.35566e-07	0.189217	0.927	0.883	0.0164248	CD8+ T-3	Cd2
1.12805e-06	0.117914	0.96	0.898	0.019804	CD8+ T-3	Eif3h
1.14563e-06	0.113698	0.416	0.33	0.0201126	CD8+ T-3	Sik3
1.30367e-06	0.117941	0.436	0.349	0.0228873	CD8+ T-3	Crybg1
1.35348e-06	0.119846	0.604	0.519	0.0237617	CD8+ T-3	Cflar
1.39861e-06	0.113022	0.471	0.38	0.0245539	CD8+ T-3	Thumpd3
1.43179e-06	0.130696	0.887	0.748	0.0251365	CD8+ T-3	Tpi1
1.44256e-06	0.120854	0.96	0.899	0.0253255	CD8+ T-3	Pfdn5
1.48438e-06	0.143844	0.586	0.49	0.0260597	CD8+ T-3	Timm8b
1.49393e-06	0.112207	0.677	0.566	0.0262275	CD8+ T-3	Tmem123
1.50494e-06	0.14045	0.463	0.378	0.0264207	CD8+ T-3	Hip1r
1.62864e-06	0.162805	0.659	0.571	0.0285923	CD8+ T-3	M6pr
1.63655e-06	0.114797	0.17	0.101	0.0287313	CD8+ T-3	Axl
1.63952e-06	0.132991	0.473	0.377	0.0287833	CD8+ T-3	Mfsd14a
1.72897e-06	0.184584	0.98	0.967	0.0303538	CD8+ T-3	AW112010
1.78072e-06	0.103083	0.685	0.593	0.0312623	CD8+ T-3	Polr2g
1.84328e-06	0.118473	0.406	0.32	0.0323607	CD8+ T-3	Sytl3
1.87981e-06	0.133179	0.416	0.323	0.033002	CD8+ T-3	Ccdc115
1.88307e-06	0.106362	0.897	0.767	0.0330591	CD8+ T-3	Pgam1
2.03891e-06	0.106148	0.677	0.589	0.0357951	CD8+ T-3	Syngr2
2.06064e-06	0.122848	0.764	0.657	0.0361766	CD8+ T-3	Tmem256
2.14677e-06	0.103904	0.2	0.129	0.0376888	CD8+ T-3	Phlpp1
2.20991e-06	0.127184	0.727	0.634	0.0387972	CD8+ T-3	Cox20
2.2989e-06	0.146299	0.313	0.235	0.0403594	CD8+ T-3	Pkp4
2.35506e-06	0.116793	0.543	0.451	0.0413454	CD8+ T-3	Pik3r1
2.36078e-06	0.118025	0.644	0.549	0.0414459	CD8+ T-3	Lrmp
2.379e-06	0.121699	0.937	0.826	0.0417658	CD8+ T-3	Prelid1
2.67464e-06	0.104778	0.792	0.687	0.046956	CD8+ T-3	Ier3ip1
2.74041e-06	0.144185	0.739	0.643	0.0481107	CD8+ T-3	Lgals3
2.75902e-06	0.102098	0.873	0.784	0.0484373	CD8+ T-3	Tomm22
2.76014e-06	0.104357	0.552	0.467	0.0484571	CD8+ T-3	Hmox2
2.76688e-06	0.115771	0.749	0.647	0.0485753	CD8+ T-3	Psmd11
2.78397e-06	0.111415	0.554	0.452	0.0488754	CD8+ T-3	Chd1
2.80149e-06	0.105429	0.493	0.399	0.0491829	CD8+ T-3	Hip1
2.82464e-06	0.115001	0.855	0.76	0.0495894	CD8+ T-3	Psma4
2.97058e-06	0.114435	0.903	0.797	0.0521515	CD8+ T-3	Gnb1
3.00202e-06	0.11298	0.937	0.876	0.0527035	CD8+ T-3	Sem1
3.05004e-06	0.136751	0.4	0.313	0.0535465	CD8+ T-3	Slc16a3
3.16755e-06	0.100004	0.867	0.715	0.0556095	CD8+ T-3	Ptpn6
3.28929e-06	0.107682	0.606	0.5	0.0577467	CD8+ T-3	Smim11
3.39623e-06	0.119606	0.394	0.314	0.0596242	CD8+ T-3	Gnpnat1
3.65775e-06	0.117641	0.386	0.297	0.0642155	CD8+ T-3	Mvp
3.88123e-06	0.110216	0.798	0.704	0.0681389	CD8+ T-3	Bax
3.98253e-06	0.114067	0.923	0.844	0.0699173	CD8+ T-3	Tomm7
4.00855e-06	0.126738	0.739	0.626	0.0703741	CD8+ T-3	Casp3
4.02134e-06	0.11246	0.608	0.544	0.0705987	CD8+ T-3	Mpc1
4.09594e-06	0.136352	0.976	0.915	0.0719083	CD8+ T-3	Calm1
4.24391e-06	0.11109	0.695	0.612	0.0745061	CD8+ T-3	Lims1
4.40033e-06	0.104945	0.556	0.458	0.0772521	CD8+ T-3	Nsfl1c
4.69316e-06	0.108447	0.812	0.741	0.0823932	CD8+ T-3	Gimap5
4.70698e-06	0.114043	0.556	0.472	0.0826358	CD8+ T-3	Spag7
4.82226e-06	0.15611	0.384	0.311	0.0846597	CD8+ T-3	Slc25a17
5.09854e-06	0.125706	0.691	0.618	0.08951	CD8+ T-3	Rassf5
5.16852e-06	0.120027	0.851	0.761	0.0907386	CD8+ T-3	Bag1
5.53026e-06	0.106764	0.568	0.477	0.0970892	CD8+ T-3	Sec13
5.95478e-06	0.142956	0.614	0.533	0.104542	CD8+ T-3	Stap1
6.05571e-06	0.121118	0.663	0.587	0.106314	CD8+ T-3	Ndufs8
6.10129e-06	0.101795	0.984	0.949	0.107114	CD8+ T-3	Btg1
6.28945e-06	0.120554	0.857	0.777	0.110418	CD8+ T-3	Csnk2b
6.45598e-06	0.116319	0.901	0.822	0.113341	CD8+ T-3	Taf10
7.1335e-06	0.130863	0.622	0.523	0.125236	CD8+ T-3	Eif3b
7.17746e-06	0.119946	0.473	0.373	0.126007	CD8+ T-3	Atp2a2
7.21408e-06	0.102294	0.588	0.498	0.12665	CD8+ T-3	Ide
7.2881e-06	0.110414	0.594	0.502	0.12795	CD8+ T-3	Wbp4
7.36008e-06	0.112965	0.442	0.364	0.129214	CD8+ T-3	Rraga
7.8176e-06	0.128191	0.705	0.614	0.137246	CD8+ T-3	Psmc5
7.99623e-06	0.124832	0.549	0.45	0.140382	CD8+ T-3	Impa2
8.25085e-06	0.105522	0.945	0.868	0.144852	CD8+ T-3	Cox6b1
8.61105e-06	0.137915	0.832	0.716	0.151176	CD8+ T-3	Rps27l
1.01501e-05	0.114069	0.21	0.141	0.178195	CD8+ T-3	Sema4c
1.05845e-05	0.103585	0.636	0.57	0.185822	CD8+ T-3	Dctn2
1.07091e-05	0.121761	0.915	0.81	0.188009	CD8+ T-3	Rap1a
1.09443e-05	0.105216	0.677	0.592	0.192138	CD8+ T-3	Cyb5a
1.11333e-05	0.14211	0.681	0.595	0.195457	CD8+ T-3	Mrps36
1.20021e-05	0.122063	0.792	0.727	0.210709	CD8+ T-3	Chmp2a
1.31196e-05	0.132328	0.358	0.282	0.230328	CD8+ T-3	Pdgfb
1.35358e-05	0.117897	0.558	0.457	0.237634	CD8+ T-3	Plec
1.36776e-05	0.112345	0.509	0.443	0.240123	CD8+ T-3	Rpl7l1
1.37127e-05	0.107843	0.261	0.187	0.24074	CD8+ T-3	Hivep1
1.54161e-05	0.120434	0.685	0.602	0.270646	CD8+ T-3	Ufc1
1.61919e-05	0.125973	0.533	0.452	0.284264	CD8+ T-3	Gps1
1.67932e-05	0.1015	0.61	0.531	0.294821	CD8+ T-3	Mrpl36
1.75678e-05	0.108571	0.778	0.672	0.308421	CD8+ T-3	Smarca5
1.83582e-05	0.22869	0.687	0.61	0.322297	CD8+ T-3	Serpina3g
1.85494e-05	0.101535	0.804	0.697	0.325654	CD8+ T-3	Tpm4
1.87119e-05	0.110169	0.677	0.59	0.328506	CD8+ T-3	Hspa4
1.88866e-05	0.122193	0.939	0.91	0.331574	CD8+ T-3	Ltb
2.11225e-05	0.101075	0.741	0.623	0.370826	CD8+ T-3	Ndufb2
2.12621e-05	0.107745	0.436	0.362	0.373277	CD8+ T-3	Tusc3
2.4209e-05	0.102578	0.743	0.647	0.425013	CD8+ T-3	Rdx
2.47836e-05	0.114778	0.723	0.63	0.4351	CD8+ T-3	Denr
2.56806e-05	0.131064	0.865	0.738	0.450848	CD8+ T-3	Psmb2
2.98188e-05	0.143	0.885	0.814	0.523499	CD8+ T-3	Pgk1
3.08182e-05	0.106717	0.618	0.545	0.541044	CD8+ T-3	Gstp3
3.13314e-05	0.117128	0.408	0.333	0.550053	CD8+ T-3	Sssca1
3.35903e-05	0.131446	0.168	0.106	0.589712	CD8+ T-3	Nrn1
3.38126e-05	0.135252	0.451	0.374	0.593614	CD8+ T-3	Eef1e1
3.42051e-05	0.138187	0.889	0.775	0.600505	CD8+ T-3	Snrpd2
3.52708e-05	0.11938	0.448	0.37	0.619214	CD8+ T-3	Smco4
3.6584e-05	0.114599	0.519	0.448	0.642269	CD8+ T-3	Nabp1
4.8838e-05	0.10225	0.749	0.646	0.8574	CD8+ T-3	Mrpl20
4.89178e-05	0.13423	0.909	0.832	0.858801	CD8+ T-3	Psma7
4.94199e-05	0.274208	0.699	0.622	0.867617	CD8+ T-3	Odc1
5.15424e-05	0.138746	0.622	0.539	0.904878	CD8+ T-3	Ebna1bp2
5.26961e-05	0.170449	0.545	0.467	0.925133	CD8+ T-3	Serpinb6a
6.20631e-05	0.116455	0.907	0.862	1	CD8+ T-3	Calr
6.28755e-05	0.116948	0.192	0.132	1	CD8+ T-3	2310031A07Rik
6.79481e-05	0.121731	0.453	0.39	1	CD8+ T-3	St6galnac4
7.69201e-05	0.107702	0.659	0.588	1	CD8+ T-3	Ube2a
7.9071e-05	0.159168	0.455	0.381	1	CD8+ T-3	Camk2n1
7.94622e-05	0.131673	0.721	0.667	1	CD8+ T-3	Ccni
8.40933e-05	0.104837	0.877	0.788	1	CD8+ T-3	Uqcrb
8.43572e-05	0.110514	0.756	0.669	1	CD8+ T-3	Eif5b
8.67884e-05	0.141264	0.598	0.517	1	CD8+ T-3	Mapkapk3
8.71828e-05	0.191635	0.107	0.061	1	CD8+ T-3	Gsta4
9.39322e-05	0.105377	0.525	0.458	1	CD8+ T-3	Tmf1
9.64639e-05	0.128467	0.186	0.122	1	CD8+ T-3	Maf
9.70988e-05	0.113679	0.349	0.276	1	CD8+ T-3	Ikzf4
0.000100025	0.363588	0.141	0.088	1	CD8+ T-3	Cd81
0.000102019	0.10413	0.483	0.417	1	CD8+ T-3	Pnkd
0.00010641	0.105276	0.618	0.536	1	CD8+ T-3	Timm17a
0.00011056	0.100282	0.537	0.475	1	CD8+ T-3	Adipor2
0.000114438	0.103391	0.861	0.784	1	CD8+ T-3	Uqcr10
0.000126164	0.119803	0.764	0.675	1	CD8+ T-3	Grcc10
0.000135399	0.101146	0.986	0.953	1	CD8+ T-3	Pfn1
0.000142837	0.118927	0.362	0.292	1	CD8+ T-3	Dusp6
0.000143676	0.104477	0.848	0.758	1	CD8+ T-3	Psmd8
0.00016009	0.101285	0.772	0.704	1	CD8+ T-3	Rgs1
0.000169875	0.111898	0.455	0.399	1	CD8+ T-3	Tnfsf10
0.000174163	0.183358	0.194	0.134	1	CD8+ T-3	Igkc
0.000186282	0.109434	0.966	0.909	1	CD8+ T-3	Thy1
0.000221531	0.110489	0.63	0.556	1	CD8+ T-3	Eif3j1
0.000227357	0.100934	0.725	0.63	1	CD8+ T-3	Sms
0.000333891	0.110187	0.307	0.243	1	CD8+ T-3	Furin
0.000344155	0.104917	0.978	0.937	1	CD8+ T-3	Myl6
0.000350868	0.101355	0.711	0.647	1	CD8+ T-3	Tbcb
0.000354256	0.111356	0.527	0.453	1	CD8+ T-3	Magohb
0.000358213	0.151713	0.917	0.845	1	CD8+ T-3	Mif
0.000412349	0.111229	0.253	0.194	1	CD8+ T-3	Jdp2
0.000422188	0.126815	0.719	0.645	1	CD8+ T-3	Tomm5
0.000440524	0.215744	0.713	0.657	1	CD8+ T-3	Trbc1
0.000470111	0.119517	0.101	0.06	1	CD8+ T-3	Sulf2
0.000521747	0.124673	0.679	0.614	1	CD8+ T-3	Eif3g
0.000546646	0.100593	0.685	0.598	1	CD8+ T-3	Acot7
0.000556348	0.111898	0.394	0.331	1	CD8+ T-3	Ubash3a
0.000557221	0.123041	0.158	0.105	1	CD8+ T-3	Cxcl9
0.000560958	0.102092	0.877	0.788	1	CD8+ T-3	Mdh2
0.000669855	0.421119	0.115	0.072	1	CD8+ T-3	Tnfsf8
0.000696262	0.101496	0.695	0.641	1	CD8+ T-3	Tnfaip8
0.000937788	0.154673	0.224	0.174	1	CD8+ T-3	Gldc
0.00114422	0.104219	0.23	0.179	1	CD8+ T-3	Gcsh
0.00159992	0.131159	0.178	0.128	1	CD8+ T-3	Klri2
0.00264901	0.102989	0.467	0.415	1	CD8+ T-3	Ddx27
0.00324283	0.101635	0.39	0.34	1	CD8+ T-3	Nol12
0.00356831	0.131562	0.358	0.306	1	CD8+ T-3	C1qb
0.00374843	0.131212	0.952	0.905	1	CD8+ T-3	Arl6ip1
0.00508452	0.10191	0.911	0.839	1	CD8+ T-3	Anp32a
0.00523635	0.118441	0.289	0.244	1	CD8+ T-3	Spry2
0.00612965	0.13944	0.735	0.682	1	CD8+ T-3	Plac8
1.3895e-88	1.27118	0.995	0.997	2.4394e-84	CD8+ T-4	mt-Co1
8.99019e-69	1.31412	0.995	0.998	1.57832e-64	CD8+ T-4	mt-Atp6
6.39132e-66	1.29005	0.995	0.999	1.12206e-61	CD8+ T-4	mt-Co3
2.2203e-60	2.22024	0.386	0.102	3.89795e-56	CD8+ T-4	Hspa1b
3.76345e-57	0.951228	0.987	0.987	6.60711e-53	CD8+ T-4	Malat1
4.03826e-55	2.06172	0.359	0.094	7.08958e-51	CD8+ T-4	Hspa1a
1.0355e-54	1.23041	0.997	0.997	1.81793e-50	CD8+ T-4	mt-Co2
3.01835e-43	0.939594	0.919	0.945	5.29902e-39	CD8+ T-4	Xist
1.73546e-35	1.28123	0.985	0.995	3.04678e-31	CD8+ T-4	mt-Cytb
2.82039e-34	1.20109	0.975	0.994	4.95147e-30	CD8+ T-4	mt-Nd4
4.4672e-26	1.18211	0.967	0.99	7.84261e-22	CD8+ T-4	mt-Nd2
9.57536e-22	1.09098	0.967	0.995	1.68105e-17	CD8+ T-4	mt-Nd1
2.81113e-20	0.65011	0.957	0.986	4.93521e-16	CD8+ T-4	H2-Q7
3.58132e-18	0.726197	0.816	0.898	6.28737e-14	CD8+ T-4	H2-Q4
7.80768e-18	0.731793	0.813	0.891	1.37072e-13	CD8+ T-4	H2-Q6
4.25739e-17	0.100467	0.356	0.695	7.47427e-13	CD8+ T-4	Ebp
1.49286e-15	0.546114	0.917	0.982	2.62087e-11	CD8+ T-4	Ptprc
9.97719e-15	0.130708	0.26	0.553	1.7516e-10	CD8+ T-4	Tnrc6c
1.11798e-14	0.129048	0.169	0.414	1.96272e-10	CD8+ T-4	Ncbp3
1.92045e-14	0.120064	0.28	0.566	3.37154e-10	CD8+ T-4	Gimap8
2.96384e-14	0.15733	0.242	0.521	5.20332e-10	CD8+ T-4	Cnot1
4.59469e-14	0.699633	0.672	0.757	8.06644e-10	CD8+ T-4	Tra2a
6.09021e-14	0.11712	0.242	0.507	1.0692e-09	CD8+ T-4	Cklf
7.32972e-14	0.120257	0.23	0.496	1.28681e-09	CD8+ T-4	Myo1f
8.42022e-14	0.106305	0.202	0.449	1.47825e-09	CD8+ T-4	Hnrnpll
9.01419e-14	0.106085	0.424	0.754	1.58253e-09	CD8+ T-4	Atp1b3
1.32177e-13	0.109342	0.25	0.52	2.32049e-09	CD8+ T-4	Eml4
1.42425e-13	0.792348	0.74	0.857	2.50042e-09	CD8+ T-4	mt-Nd5
1.74318e-13	0.106228	0.187	0.433	3.06033e-09	CD8+ T-4	Gpaa1
1.92945e-13	0.120976	0.154	0.384	3.38734e-09	CD8+ T-4	Faf2
2.01326e-13	0.119744	0.391	0.714	3.53448e-09	CD8+ T-4	Ppp1r16b
2.64833e-13	0.634028	0.992	0.996	4.6494e-09	CD8+ T-4	H2-K1
2.6555e-13	0.103725	0.313	0.589	4.66199e-09	CD8+ T-4	Eif4g1
3.1043e-13	0.466631	0.838	0.969	5.44991e-09	CD8+ T-4	Rbm39
3.74221e-13	0.201184	0.247	0.512	6.56982e-09	CD8+ T-4	Hsd11b1
3.84406e-13	0.127976	0.293	0.573	6.74864e-09	CD8+ T-4	Stat4
4.43427e-13	0.11024	0.306	0.598	7.78481e-09	CD8+ T-4	Lrrc8c
4.78258e-13	0.111051	0.336	0.628	8.39629e-09	CD8+ T-4	Srsf10
5.35929e-13	0.106694	0.318	0.604	9.40876e-09	CD8+ T-4	Gpbp1
5.99839e-13	0.104817	0.29	0.565	1.05308e-08	CD8+ T-4	Phf14
6.10627e-13	0.129344	0.374	0.683	1.07202e-08	CD8+ T-4	Mier1
6.57857e-13	0.103681	0.217	0.453	1.15493e-08	CD8+ T-4	Rock2
8.96035e-13	0.126012	0.263	0.517	1.57308e-08	CD8+ T-4	Ppp3cb
9.13155e-13	0.103168	0.235	0.48	1.60314e-08	CD8+ T-4	Aak1
9.53114e-13	0.106023	0.396	0.716	1.67329e-08	CD8+ T-4	Cnot6l
1.00765e-12	0.126653	0.429	0.759	1.76903e-08	CD8+ T-4	Tm9sf3
1.32448e-12	0.138031	0.356	0.665	2.32526e-08	CD8+ T-4	Il21r
1.77731e-12	0.113293	0.258	0.505	3.12025e-08	CD8+ T-4	Derl2
1.80305e-12	0.271049	0.333	0.644	3.16544e-08	CD8+ T-4	Lfng
1.85709e-12	0.128427	0.197	0.43	3.26031e-08	CD8+ T-4	Med15
1.88031e-12	0.109289	0.225	0.474	3.30107e-08	CD8+ T-4	Man1a2
2.55767e-12	0.11183	0.442	0.794	4.49024e-08	CD8+ T-4	Zc3hav1
3.01754e-12	0.122978	0.28	0.536	5.29759e-08	CD8+ T-4	Ppp1cb
3.92371e-12	0.153957	0.427	0.739	6.88846e-08	CD8+ T-4	Ssr2
3.96087e-12	0.122529	0.273	0.535	6.95371e-08	CD8+ T-4	Pdhb
4.11114e-12	0.109699	0.217	0.46	7.21751e-08	CD8+ T-4	Pon2
4.83559e-12	0.130491	0.265	0.527	8.48937e-08	CD8+ T-4	Adam19
4.87005e-12	0.132655	0.28	0.548	8.54987e-08	CD8+ T-4	Tnrc6a
5.16005e-12	0.157601	0.361	0.656	9.05898e-08	CD8+ T-4	Dnajb11
6.13518e-12	0.117045	0.189	0.414	1.07709e-07	CD8+ T-4	Med1
6.48038e-12	0.101637	0.159	0.367	1.1377e-07	CD8+ T-4	Zmpste24
6.76005e-12	0.123616	0.154	0.361	1.18679e-07	CD8+ T-4	Dpp8
8.46209e-12	0.120535	0.157	0.369	1.4856e-07	CD8+ T-4	Pglyrp2
8.6732e-12	0.138988	0.278	0.543	1.52267e-07	CD8+ T-4	Ddx3x
8.81717e-12	0.165028	0.222	0.468	1.54794e-07	CD8+ T-4	Tmem173
8.86487e-12	0.156232	0.154	0.362	1.55632e-07	CD8+ T-4	Hltf
8.96965e-12	0.122208	0.273	0.523	1.57471e-07	CD8+ T-4	Zbtb1
9.68184e-12	0.107595	0.268	0.509	1.69974e-07	CD8+ T-4	Bcl10
9.87812e-12	0.106298	0.245	0.497	1.7342e-07	CD8+ T-4	Ep400
9.94956e-12	0.188611	0.278	0.554	1.74675e-07	CD8+ T-4	Prrc2b
1.17743e-11	0.201297	0.242	0.491	2.06709e-07	CD8+ T-4	Xrn1
1.24547e-11	0.178406	0.308	0.579	2.18655e-07	CD8+ T-4	Fryl
1.36895e-11	0.106971	0.202	0.427	2.40332e-07	CD8+ T-4	Usp48
2.10614e-11	0.134618	0.169	0.382	3.69755e-07	CD8+ T-4	Ubr4
2.39335e-11	0.127127	0.341	0.628	4.20176e-07	CD8+ T-4	Sar1b
2.55771e-11	0.118662	0.258	0.49	4.49032e-07	CD8+ T-4	Elmo1
2.59791e-11	0.103925	0.222	0.461	4.56089e-07	CD8+ T-4	Cdk17
2.8741e-11	0.861152	0.614	0.68	5.04578e-07	CD8+ T-4	Klf6
3.3648e-11	0.143868	0.457	0.79	5.90724e-07	CD8+ T-4	Cd27
3.5441e-11	0.163339	0.258	0.498	6.22203e-07	CD8+ T-4	Pik3r1
3.58067e-11	0.116139	0.217	0.431	6.28623e-07	CD8+ T-4	Camk2g
3.79171e-11	0.129092	0.336	0.615	6.65673e-07	CD8+ T-4	2810474O19Rik
4.06079e-11	0.146003	0.389	0.686	7.12912e-07	CD8+ T-4	Prpf4b
4.08492e-11	0.13941	0.26	0.51	7.17149e-07	CD8+ T-4	Yme1l1
4.40493e-11	0.220408	0.273	0.526	7.73329e-07	CD8+ T-4	Nfatc3
4.47771e-11	0.212683	0.253	0.498	7.86108e-07	CD8+ T-4	Chd8
4.72505e-11	0.126029	0.162	0.359	8.29529e-07	CD8+ T-4	Med4
4.82808e-11	0.121505	0.417	0.74	8.47618e-07	CD8+ T-4	Yy1
4.97343e-11	0.135491	0.24	0.483	8.73136e-07	CD8+ T-4	Il10rb
5.06012e-11	0.184597	0.179	0.387	8.88355e-07	CD8+ T-4	Dicer1
5.09065e-11	0.12807	0.253	0.485	8.93714e-07	CD8+ T-4	Trpv2
5.64989e-11	0.150932	0.26	0.496	9.91895e-07	CD8+ T-4	Cdc40
5.90138e-11	0.129675	0.361	0.641	1.03605e-06	CD8+ T-4	Cyld
6.32811e-11	0.179014	0.364	0.647	1.11096e-06	CD8+ T-4	Pik3cd
6.56097e-11	0.107828	0.247	0.49	1.15184e-06	CD8+ T-4	Nudcd3
7.1644e-11	0.121479	0.288	0.539	1.25778e-06	CD8+ T-4	Cdk11b
7.23102e-11	0.164481	0.417	0.721	1.26948e-06	CD8+ T-4	Ikzf1
8.12688e-11	0.145537	0.275	0.515	1.42675e-06	CD8+ T-4	Ilf2
8.63299e-11	0.12346	0.169	0.369	1.51561e-06	CD8+ T-4	Rcn1
8.84881e-11	0.112562	0.177	0.379	1.5535e-06	CD8+ T-4	Usp9x
9.41577e-11	0.137826	0.258	0.502	1.65303e-06	CD8+ T-4	Trip11
9.48305e-11	0.144935	0.283	0.545	1.66484e-06	CD8+ T-4	Inpp5d
9.49466e-11	0.122115	0.27	0.52	1.66688e-06	CD8+ T-4	Rsf1
9.51084e-11	0.220171	0.447	0.753	1.66972e-06	CD8+ T-4	Bcap31
1.04952e-10	0.126558	0.275	0.517	1.84254e-06	CD8+ T-4	Adipor2
1.12801e-10	0.161641	0.237	0.466	1.98034e-06	CD8+ T-4	Gabpb2
1.12823e-10	0.148344	0.237	0.477	1.98072e-06	CD8+ T-4	Pdia4
1.22408e-10	0.180342	0.295	0.558	2.14899e-06	CD8+ T-4	Yipf1
1.22686e-10	0.160998	0.232	0.467	2.15387e-06	CD8+ T-4	Safb
1.32926e-10	0.124563	0.199	0.414	2.33365e-06	CD8+ T-4	Dnmt3a
1.39676e-10	0.157089	0.268	0.512	2.45216e-06	CD8+ T-4	Crot
1.42592e-10	0.142091	0.227	0.455	2.50335e-06	CD8+ T-4	Rbm6
1.46931e-10	0.165825	0.379	0.679	2.57953e-06	CD8+ T-4	Glmp
1.49932e-10	0.134878	0.199	0.403	2.6322e-06	CD8+ T-4	Erlec1
1.59885e-10	0.147799	0.407	0.708	2.80694e-06	CD8+ T-4	2021-03-02
1.66454e-10	0.129759	0.356	0.632	2.92226e-06	CD8+ T-4	Nsd1
1.7522e-10	0.170063	0.389	0.694	3.07617e-06	CD8+ T-4	Lgals3bp
1.76425e-10	0.293216	0.341	0.654	3.09732e-06	CD8+ T-4	Dnajc3
1.78205e-10	0.123256	0.124	0.301	3.12856e-06	CD8+ T-4	Ext2
1.8101e-10	0.161227	0.258	0.498	3.17782e-06	CD8+ T-4	Chd3
1.86592e-10	0.121279	0.321	0.574	3.27581e-06	CD8+ T-4	Surf4
2.11296e-10	0.154171	0.154	0.347	3.70951e-06	CD8+ T-4	Setd1b
2.12595e-10	0.152705	0.303	0.561	3.73231e-06	CD8+ T-4	Yipf3
2.34934e-10	0.197452	0.23	0.459	4.1245e-06	CD8+ T-4	Mogs
2.51317e-10	0.207245	0.354	0.624	4.41212e-06	CD8+ T-4	Grap2
2.6696e-10	0.122297	0.215	0.425	4.68675e-06	CD8+ T-4	Hook3
2.92537e-10	0.613418	0.79	0.902	5.13578e-06	CD8+ T-4	Hspa5
2.94373e-10	0.116394	0.316	0.578	5.16802e-06	CD8+ T-4	Cltc
3.1222e-10	0.135255	0.26	0.486	5.48133e-06	CD8+ T-4	Mindy2
3.30483e-10	0.141526	0.197	0.411	5.80196e-06	CD8+ T-4	Atp6v0a2
3.33234e-10	0.123658	0.146	0.33	5.85026e-06	CD8+ T-4	Zdhhc6
3.41069e-10	0.133083	0.278	0.509	5.98781e-06	CD8+ T-4	Becn1
3.43373e-10	0.164772	0.404	0.7	6.02826e-06	CD8+ T-4	Ddost
3.71174e-10	0.142487	0.366	0.659	6.51633e-06	CD8+ T-4	Ubxn4
3.82953e-10	0.188141	0.424	0.74	6.72312e-06	CD8+ T-4	Spn
3.87371e-10	0.121756	0.192	0.393	6.80068e-06	CD8+ T-4	Slc38a10
3.99693e-10	0.127075	0.177	0.372	7.01702e-06	CD8+ T-4	Phkg2
4.06317e-10	0.143816	0.346	0.63	7.13331e-06	CD8+ T-4	Ube3a
4.11601e-10	0.115098	0.152	0.329	7.22607e-06	CD8+ T-4	Fabp5
4.29466e-10	0.173581	0.331	0.597	7.53971e-06	CD8+ T-4	Chd7
4.33677e-10	0.156446	0.194	0.403	7.61363e-06	CD8+ T-4	Lman1
4.338e-10	0.102209	0.146	0.326	7.61578e-06	CD8+ T-4	Ints6
4.34753e-10	0.87363	0.604	0.669	7.63252e-06	CD8+ T-4	Dennd4a
4.37196e-10	0.105856	0.199	0.405	7.67541e-06	CD8+ T-4	Zmynd11
4.46656e-10	0.153559	0.409	0.698	7.84149e-06	CD8+ T-4	Fam173a
4.67536e-10	0.164924	0.187	0.397	8.20806e-06	CD8+ T-4	Uggt1
4.88242e-10	0.216626	0.444	0.75	8.57157e-06	CD8+ T-4	Bptf
5.34132e-10	0.120861	0.162	0.349	9.37722e-06	CD8+ T-4	Rasa2
5.46294e-10	0.15382	0.169	0.362	9.59073e-06	CD8+ T-4	Ccdc88b
6.08447e-10	0.192213	0.356	0.616	1.06819e-05	CD8+ T-4	Fbxw2
6.14642e-10	0.144225	0.313	0.585	1.07907e-05	CD8+ T-4	Rchy1
6.25465e-10	0.109904	0.457	0.751	1.09807e-05	CD8+ T-4	Acin1
6.29051e-10	0.140913	0.227	0.444	1.10436e-05	CD8+ T-4	Trpc4ap
6.88018e-10	0.164607	0.341	0.605	1.20788e-05	CD8+ T-4	Atxn7l3b
7.05868e-10	0.11503	0.159	0.344	1.23922e-05	CD8+ T-4	Myo9b
7.18367e-10	0.159729	0.22	0.43	1.26116e-05	CD8+ T-4	Cabin1
7.27911e-10	0.112448	0.139	0.314	1.27792e-05	CD8+ T-4	Srebf1
7.28633e-10	0.149595	0.141	0.321	1.27919e-05	CD8+ T-4	Nsf
7.48995e-10	0.13292	0.222	0.441	1.31494e-05	CD8+ T-4	Nlrc3
7.54657e-10	0.113172	0.313	0.553	1.32488e-05	CD8+ T-4	Atxn2l
8.16608e-10	0.115134	0.146	0.329	1.43364e-05	CD8+ T-4	Edem2
8.23228e-10	0.115821	0.273	0.51	1.44526e-05	CD8+ T-4	Nptn
8.29168e-10	0.117684	0.182	0.375	1.45569e-05	CD8+ T-4	Plpbp
8.30618e-10	0.140677	0.255	0.491	1.45823e-05	CD8+ T-4	Baz2a
8.36158e-10	0.11431	0.22	0.432	1.46796e-05	CD8+ T-4	Srek1
9.22895e-10	0.107308	0.164	0.352	1.62023e-05	CD8+ T-4	Ankib1
9.31722e-10	0.116014	0.255	0.468	1.63573e-05	CD8+ T-4	Babam2
9.50993e-10	0.100695	0.189	0.39	1.66956e-05	CD8+ T-4	Gusb
9.51024e-10	0.179757	0.285	0.52	1.66962e-05	CD8+ T-4	Ikbkb
9.61165e-10	0.102586	0.293	0.534	1.68742e-05	CD8+ T-4	Riok1
1.00689e-09	0.276453	0.295	0.556	1.76769e-05	CD8+ T-4	Alg5
1.0425e-09	1.06236	0.699	0.873	1.83022e-05	CD8+ T-4	Hsp90aa1
1.08649e-09	0.116623	0.273	0.499	1.90745e-05	CD8+ T-4	Rad23b
1.2378e-09	0.147269	0.194	0.405	2.17308e-05	CD8+ T-4	S1pr4
1.24106e-09	0.144735	0.207	0.415	2.17881e-05	CD8+ T-4	Txndc15
1.27805e-09	0.162094	0.172	0.369	2.24375e-05	CD8+ T-4	Mgat1
1.30327e-09	0.121978	0.141	0.312	2.28802e-05	CD8+ T-4	Rhno1
1.30721e-09	0.176381	0.227	0.446	2.29493e-05	CD8+ T-4	Adam10
1.31419e-09	0.142081	0.348	0.623	2.30718e-05	CD8+ T-4	Ctsa
1.36313e-09	0.101318	0.119	0.283	2.39311e-05	CD8+ T-4	Zfp950
1.43646e-09	0.135035	0.23	0.446	2.52184e-05	CD8+ T-4	Fcho1
1.54844e-09	0.166544	0.306	0.546	2.71844e-05	CD8+ T-4	Il18r1
1.55008e-09	0.163466	0.27	0.506	2.72131e-05	CD8+ T-4	Arid4a
1.55568e-09	0.229525	0.26	0.501	2.73114e-05	CD8+ T-4	Sptbn1
1.63745e-09	0.195657	0.225	0.448	2.87471e-05	CD8+ T-4	Tm9sf2
1.64598e-09	0.125888	0.232	0.45	2.88968e-05	CD8+ T-4	Dync1h1
1.84872e-09	0.103522	0.449	0.738	3.24561e-05	CD8+ T-4	Rab14
1.85366e-09	0.112895	0.29	0.515	3.25429e-05	CD8+ T-4	Ppm1h
1.87559e-09	0.105998	0.237	0.438	3.29279e-05	CD8+ T-4	Nsd2
1.93932e-09	0.112889	0.129	0.293	3.40466e-05	CD8+ T-4	Kat7
1.99531e-09	0.103696	0.194	0.389	3.50296e-05	CD8+ T-4	Iws1
2.03996e-09	0.138833	0.164	0.349	3.58135e-05	CD8+ T-4	Rab3gap1
2.14849e-09	0.213265	0.343	0.603	3.77188e-05	CD8+ T-4	Sema4a
2.20279e-09	0.108972	0.154	0.333	3.86722e-05	CD8+ T-4	Herpud1
2.27161e-09	0.115848	0.144	0.312	3.98804e-05	CD8+ T-4	Wsb1
2.29428e-09	0.118218	0.174	0.361	4.02784e-05	CD8+ T-4	Ankrd39
2.50691e-09	0.145296	0.23	0.439	4.40113e-05	CD8+ T-4	Dennd1c
2.56718e-09	0.118633	0.116	0.275	4.50695e-05	CD8+ T-4	Tfrc
2.61614e-09	0.204746	0.354	0.602	4.5929e-05	CD8+ T-4	Sf3b3
2.70423e-09	0.210358	0.396	0.688	4.74754e-05	CD8+ T-4	Zcchc11
2.7153e-09	0.140562	0.202	0.406	4.76698e-05	CD8+ T-4	C1galt1
2.76518e-09	0.137615	0.611	0.926	4.85455e-05	CD8+ T-4	Tmem50a
2.77047e-09	0.106846	0.212	0.415	4.86384e-05	CD8+ T-4	Mfsd10
2.78047e-09	0.143155	0.247	0.465	4.88139e-05	CD8+ T-4	Notch1
2.80712e-09	0.182021	0.114	0.275	4.92818e-05	CD8+ T-4	Nvl
2.86569e-09	0.161608	0.376	0.637	5.031e-05	CD8+ T-4	Cd96
3.3153e-09	0.120295	0.225	0.437	5.82034e-05	CD8+ T-4	Unc13d
3.77976e-09	0.134446	0.162	0.336	6.63574e-05	CD8+ T-4	Rnf125
4.21541e-09	0.207044	0.212	0.419	7.40058e-05	CD8+ T-4	Brd9
4.34388e-09	0.192871	0.207	0.41	7.62612e-05	CD8+ T-4	Slc6a6
4.48538e-09	0.138555	0.247	0.466	7.87453e-05	CD8+ T-4	Il27ra
4.57205e-09	0.158027	0.371	0.638	8.02669e-05	CD8+ T-4	Syngr2
4.72828e-09	0.125352	0.253	0.461	8.30097e-05	CD8+ T-4	Ccdc107
4.75279e-09	0.108047	0.27	0.479	8.34399e-05	CD8+ T-4	Sp3
5.07533e-09	0.153472	0.184	0.379	8.91024e-05	CD8+ T-4	Sytl2
5.78894e-09	0.267282	0.242	0.454	0.000101631	CD8+ T-4	Ifnar1
6.18577e-09	0.16273	0.215	0.412	0.000108597	CD8+ T-4	Cdc14a
6.24319e-09	0.148703	0.29	0.516	0.000109605	CD8+ T-4	Tnks2
6.3115e-09	0.606206	0.987	0.995	0.000110805	CD8+ T-4	H2-D1
6.33555e-09	0.115827	0.149	0.316	0.000111227	CD8+ T-4	2410004B18Rik
6.82027e-09	0.101773	0.215	0.414	0.000119737	CD8+ T-4	Map4k2
6.83256e-09	0.220134	0.255	0.483	0.000119952	CD8+ T-4	AI467606
6.86508e-09	0.206095	0.422	0.726	0.000120523	CD8+ T-4	Ankrd12
7.23921e-09	0.114513	0.258	0.467	0.000127091	CD8+ T-4	Larp4b
7.25376e-09	0.155211	0.288	0.522	0.000127347	CD8+ T-4	Zmiz1
8.01595e-09	0.120328	0.116	0.267	0.000140728	CD8+ T-4	Rprd1b
8.0542e-09	0.155207	0.247	0.472	0.0001414	CD8+ T-4	Erap1
8.14961e-09	0.122015	0.447	0.735	0.000143075	CD8+ T-4	H13
8.58783e-09	0.120751	0.144	0.31	0.000150768	CD8+ T-4	Reps1
8.85048e-09	0.117238	0.162	0.342	0.000155379	CD8+ T-4	Tug1
9.15745e-09	0.143919	0.21	0.413	0.000160768	CD8+ T-4	Tmem259
9.63374e-09	0.103914	0.237	0.435	0.00016913	CD8+ T-4	Hipk1
9.64357e-09	0.146112	0.167	0.347	0.000169303	CD8+ T-4	Crtc3
9.96048e-09	0.157674	0.316	0.566	0.000174866	CD8+ T-4	Cflar
1.01507e-08	0.202409	0.439	0.754	0.000178206	CD8+ T-4	Tmed10
1.05863e-08	0.115997	0.298	0.52	0.000185854	CD8+ T-4	Safb2
1.06347e-08	0.232684	0.162	0.338	0.000186704	CD8+ T-4	Rnf145
1.06481e-08	0.178832	0.182	0.362	0.000186937	CD8+ T-4	Herc2
1.06857e-08	0.129657	0.162	0.33	0.000187598	CD8+ T-4	Zfp945
1.09974e-08	0.154336	0.253	0.48	0.00019307	CD8+ T-4	Tmx1
1.12242e-08	0.101719	0.237	0.442	0.000197051	CD8+ T-4	Ggh
1.12975e-08	0.144632	0.245	0.451	0.000198339	CD8+ T-4	Dcaf8
1.15974e-08	0.1099	0.126	0.28	0.000203603	CD8+ T-4	Slc39a6
1.1904e-08	0.244696	0.283	0.531	0.000208986	CD8+ T-4	Acp5
1.20652e-08	0.128045	0.182	0.369	0.000211817	CD8+ T-4	Mia3
1.26229e-08	0.103757	0.179	0.353	0.000221607	CD8+ T-4	Reep3
1.29924e-08	0.132799	0.144	0.312	0.000228094	CD8+ T-4	Fam208b
1.33096e-08	0.156958	0.179	0.36	0.000233664	CD8+ T-4	Tmc6
1.43922e-08	0.202893	0.225	0.418	0.000252669	CD8+ T-4	Ormdl1
1.51018e-08	0.135142	0.136	0.3	0.000265127	CD8+ T-4	Zzef1
1.52414e-08	0.143721	0.174	0.349	0.000267578	CD8+ T-4	Tmem109
1.52649e-08	0.102148	0.167	0.342	0.00026799	CD8+ T-4	Gmip
1.55369e-08	0.123897	0.169	0.354	0.000272766	CD8+ T-4	Hexb
1.57696e-08	0.265825	0.23	0.449	0.000276851	CD8+ T-4	Trim35
1.58023e-08	0.227049	0.24	0.462	0.000277425	CD8+ T-4	Dennd1b
1.62601e-08	0.206609	0.217	0.422	0.000285462	CD8+ T-4	Fam208a
1.63307e-08	0.167834	0.26	0.481	0.000286702	CD8+ T-4	Chfr
1.65613e-08	0.156283	0.235	0.432	0.000290749	CD8+ T-4	Sptlc2
1.67016e-08	0.112129	0.338	0.59	0.000293213	CD8+ T-4	Wdr26
1.69952e-08	0.116852	0.083	0.217	0.000298368	CD8+ T-4	Nceh1
1.7242e-08	0.127043	0.199	0.384	0.000302701	CD8+ T-4	Dido1
1.78514e-08	0.184785	0.379	0.642	0.000313399	CD8+ T-4	Cblb
1.93698e-08	0.130388	0.455	0.744	0.000340057	CD8+ T-4	Erp29
1.94176e-08	0.102166	0.293	0.515	0.000340896	CD8+ T-4	Nrd1
1.95819e-08	0.174037	0.169	0.347	0.00034378	CD8+ T-4	Kdm5c
2.01432e-08	0.102237	0.162	0.34	0.000353634	CD8+ T-4	Csnk1g1
2.06412e-08	0.11464	0.124	0.277	0.000362377	CD8+ T-4	Prkcd
2.18413e-08	0.157779	0.149	0.313	0.000383445	CD8+ T-4	Terf1
2.22783e-08	0.108305	0.505	0.805	0.000391118	CD8+ T-4	Dusp2
2.26842e-08	0.146408	0.326	0.574	0.000398244	CD8+ T-4	Trip12
2.31768e-08	0.155825	0.164	0.33	0.000406892	CD8+ T-4	Fam129a
2.35805e-08	0.19492	0.321	0.553	0.000413979	CD8+ T-4	Dhrs7
2.41434e-08	0.185221	0.172	0.348	0.000423862	CD8+ T-4	Cmtm6
2.44581e-08	0.133274	0.154	0.315	0.000429386	CD8+ T-4	Klc1
2.45455e-08	0.1608	0.187	0.369	0.000430921	CD8+ T-4	Prkd2
2.47236e-08	0.117991	0.194	0.375	0.000434047	CD8+ T-4	Tmem60
2.52148e-08	0.136959	0.227	0.426	0.00044267	CD8+ T-4	Ttc3
2.52316e-08	0.151643	0.167	0.34	0.000442966	CD8+ T-4	Taok1
2.57149e-08	0.125364	0.154	0.32	0.000451451	CD8+ T-4	Upf2
[truncated: 3,318 more rows]
