# Supplementary material for: Dual checkpoint blockade of CD47 and PD-L1 using an affinity-tuned bispecific antibody maximizes antitumor immunity
Source: HighWire-hosted journal article supplement (doi:10.1136/jitc-2021-003464), 2021-10-01
Supplement: jitc-2021-003464supp007_data_supplement.xlsx [file jitc-2021-003464supp007_data_supplement.xlsx]

## Sheet: DE genes BisAb vs Control
p_val	avg_logFC	pct.1	pct.2	p_val_adj	gene
8.47685e-25	-1.19708	0.951	1	1.4882e-20	Gm42418
3.56047e-13	-0.756026	0.439	0.778	6.25076e-09	mt-Nd4l
1.46662e-12	-0.437907	0.945	0.978	2.57481e-08	Uba52
1.64907e-12	0.572315	0.977	0.911	2.89511e-08	S100a10
5.07478e-12	-0.565763	0.648	0.9	8.90928e-08	mt-Nd5
5.62164e-12	-0.475022	0.977	0.989	9.86935e-08	Ptprc
8.63853e-12	0.545324	0.997	0.989	1.51658e-07	Actg1
9.25567e-12	-0.454877	0.988	1	1.62492e-07	Rps29
1.77739e-11	-0.265678	0.012	0.178	3.12039e-07	Hist2h2ac
6.57674e-11	0.670525	0.91	0.756	1.15461e-06	Nkg7
6.92875e-11	0.368046	0.988	0.956	1.21641e-06	Rac2
1.51181e-10	0.326919	0.991	1	2.65413e-06	Ubb
4.29713e-10	-0.435347	0.422	0.756	7.54403e-06	Hp1bp3
6.94519e-10	0.548545	0.983	0.922	1.2193e-05	AW112010
9.69115e-10	-0.390985	0.974	1	1.70138e-05	Rpl35
9.86532e-10	0.879075	0.887	0.667	1.73196e-05	Ccl5
1.0399e-09	-0.254825	0.035	0.222	1.82565e-05	Lrpprc
1.28643e-09	0.457179	0.997	0.956	2.25845e-05	Ms4a4b
4.8578e-09	0.288658	1	1	8.52835e-05	H2-K1
5.90583e-09	0.664415	0.924	0.811	0.000103683	Lgals1
9.72655e-09	0.30276	0.977	0.978	0.000170759	Eif3f
1.26768e-08	-0.816115	0.323	0.633	0.000222555	Il7r
1.63131e-08	0.696937	0.898	0.644	0.000286393	S100a6
1.76614e-08	-0.309469	0.047	0.233	0.000310063	Filip1l
1.84985e-08	0.653651	0.904	0.756	0.000324759	Ly6a
2.39057e-08	0.265029	0.997	1	0.000419688	Tmsb4x
2.43023e-08	-0.372749	0.241	0.544	0.000426651	Erbin
2.74012e-08	-0.313299	0.262	0.567	0.000481056	Tlk1
3.50688e-08	-0.290608	0.991	1	0.000615667	Rps27
4.07384e-08	-0.300245	0.983	0.989	0.000715203	Rps26
4.09586e-08	0.387143	0.997	0.967	0.000719069	H2-Q7
4.3204e-08	0.34484	0.991	0.989	0.000758489	Fxyd5
4.84808e-08	-0.451934	0.442	0.722	0.000851129	Cdkn1b
5.18674e-08	-0.452493	0.334	0.622	0.000910585	Sptbn1
6.39547e-08	-0.274473	0.988	1	0.00112279	Rps21
7.12826e-08	-0.855567	0.137	0.367	0.00125144	AY036118
7.5655e-08	-0.36146	0.267	0.556	0.0013282	Setx
9.08524e-08	-0.323501	0.166	0.422	0.001595	Rbm26
1.01368e-07	-0.356731	0.34	0.622	0.00177961	Stag2
1.08563e-07	-0.431278	0.703	0.867	0.00190593	Hnrnpu
1.097e-07	-0.356396	0.113	0.344	0.0019259	Gm4070
1.35432e-07	-0.380622	0.578	0.856	0.00237764	Mycbp2
1.81496e-07	-0.282453	0.195	0.489	0.00318634	Smarca2
1.9556e-07	-0.329924	0.131	0.367	0.00343326	Hist1h1e
2.20271e-07	0.327889	0.936	0.844	0.00386708	Ppp1ca
2.6295e-07	-0.404584	0.791	0.922	0.00461636	Prrc2c
2.84092e-07	-0.537894	0.134	0.356	0.00498752	Sell
2.97193e-07	0.36963	0.936	0.889	0.00521752	Ptprcap
3.0631e-07	-0.302813	0.759	0.911	0.00537757	Set
3.11778e-07	0.285695	0.985	0.967	0.00547357	Clic1
3.20948e-07	-0.392486	0.302	0.589	0.00563456	Akap9
3.30247e-07	0.307198	1	0.989	0.00579782	Shisa5
3.5354e-07	-0.324456	0.288	0.567	0.00620675	Rasgrp1
3.91603e-07	-0.525242	0.416	0.644	0.00687499	Top2b
5.08184e-07	0.283893	0.994	0.956	0.00892168	Cd3d
5.40946e-07	-0.658056	0.294	0.544	0.00949685	Satb1
5.88656e-07	-0.30161	0.974	0.989	0.0103344	Rpl36a
6.52579e-07	-0.441591	0.055	0.222	0.0114567	Trgv2
6.77583e-07	-0.379032	0.308	0.556	0.0118957	Usp34
6.91406e-07	0.3392	0.977	0.967	0.0121383	Ms4a6b
7.63717e-07	-0.305282	0.887	0.989	0.0134078	Srrm2
9.41323e-07	-0.381476	0.241	0.5	0.0165259	Kbtbd11
9.48145e-07	-0.294636	0.166	0.411	0.0166456	Pcm1
1.07469e-06	-0.436463	0.424	0.656	0.0188672	Macf1
1.15375e-06	-0.296475	0.227	0.489	0.0202552	Kif2a
1.47514e-06	0.493997	0.86	0.644	0.0258975	Id2
1.54552e-06	-0.338414	0.224	0.478	0.0271331	Susd6
1.56294e-06	0.993388	0.622	0.367	0.0274389	Gzmb
1.60829e-06	0.266363	0.965	0.933	0.0282351	Lck
1.71438e-06	-0.299237	0.959	0.989	0.0300977	Rps28
1.78477e-06	-0.27537	0.282	0.544	0.0313333	Gspt1
1.79036e-06	0.405734	0.907	0.8	0.0314315	Epsti1
1.84882e-06	0.278025	0.983	0.978	0.0324579	Sh3bgrl3
1.90422e-06	-0.35277	0.48	0.722	0.0334305	Kmt2a
1.97876e-06	-0.365311	0.808	0.922	0.0347391	Akap13
1.99256e-06	0.371932	0.855	0.722	0.0349815	Rac1
2.09466e-06	-0.295481	0.16	0.378	0.0367739	Mga
2.12468e-06	0.408901	0.814	0.644	0.0373009	Prr13
2.13038e-06	0.361062	0.785	0.678	0.037401	Csnk2b
2.1769e-06	-0.26793	0.137	0.356	0.0382176	Parp1
2.20829e-06	-0.278087	0.323	0.633	0.0387688	Cblb
2.30117e-06	0.338528	0.936	0.878	0.0403994	Lsp1
2.32146e-06	0.33581	0.965	0.922	0.0407555	Selplg
2.41972e-06	0.421941	0.779	0.589	0.0424807	Slc9a3r1
2.76113e-06	-0.362985	0.654	0.8	0.0484745	Eif4g2
2.79716e-06	-0.639044	0.27	0.489	0.0491069	Lef1
2.83036e-06	-0.280473	0.276	0.522	0.0496898	Ipcef1
2.94501e-06	-0.332314	0.209	0.444	0.0517025	Jmjd1c
3.10961e-06	-0.344503	0.34	0.589	0.0545923	Ash1l
4.06492e-06	0.425371	0.794	0.611	0.0713638	Pla2g16
4.13251e-06	0.357618	0.913	0.878	0.0725503	Lat
4.14285e-06	-0.415541	0.358	0.589	0.0727318	Ddx21
4.22814e-06	-0.344064	0.267	0.511	0.0742292	Vps13a
4.78743e-06	0.260185	0.988	0.944	0.0840482	Srgn
4.91093e-06	-0.369018	0.18	0.389	0.0862163	Pdk1
5.74827e-06	-0.254762	0.134	0.333	0.100917	Zfp830
5.78546e-06	-0.377789	0.561	0.744	0.10157	Atrx
6.01026e-06	0.670412	0.561	0.311	0.105516	Gzmk
6.1646e-06	0.405756	0.878	0.7	0.108226	Ctsw
6.27667e-06	-0.315251	0.265	0.511	0.110193	Tnks2
6.37015e-06	-0.360881	0.116	0.3	0.111834	mt-Atp8
6.39032e-06	-0.367788	0.724	0.911	0.112188	Nsd3
6.4445e-06	0.283452	0.907	0.856	0.11314	Psmb3
6.48843e-06	-0.450758	0.25	0.478	0.113911	Pcgf5
6.50891e-06	-0.323129	0.308	0.544	0.11427	Rbpj
7.20087e-06	0.319103	0.974	0.9	0.126418	Cyba
7.61287e-06	-0.263428	0.055	0.2	0.133652	Hist1h4d
8.33987e-06	-0.390427	0.174	0.389	0.146415	Tspan32
8.38301e-06	0.354145	0.89	0.756	0.147172	Gnb2
9.48168e-06	-0.265013	0.049	0.189	0.16646	Bach2
9.9862e-06	-0.281176	0.087	0.256	0.175318	Apol7e
1.00423e-05	-0.292938	0.227	0.444	0.176303	Setd2
1.24581e-05	0.360232	0.814	0.6	0.218714	S100a13
1.24967e-05	-0.329457	0.25	0.456	0.219392	Mef2a
1.29161e-05	-0.275861	0.968	1	0.226755	Ddx5
1.32563e-05	0.275278	0.983	0.989	0.232727	Myl6
1.43035e-05	0.287592	0.939	0.889	0.251112	Clta
1.50945e-05	-0.390951	0.634	0.867	0.264999	Zcchc11
1.67538e-05	0.425601	0.948	0.933	0.29413	Crip1
1.71284e-05	-0.260421	0.872	0.922	0.300705	Hnrnpa3
1.76076e-05	0.364384	0.82	0.667	0.30912	Psmb10
1.79568e-05	-0.698139	0.058	0.2	0.31525	Dapl1
1.96235e-05	0.283597	0.956	0.967	0.34451	Gnai2
1.99075e-05	-0.337387	0.817	0.889	0.349496	Ncl
2.02609e-05	-0.323681	0.608	0.822	0.355701	Pak2
2.04997e-05	-0.256868	0.099	0.267	0.359892	Cmah
2.05713e-05	0.27174	0.994	0.978	0.361149	Cd52
2.10452e-05	-0.324929	0.299	0.522	0.369469	Arfgef1
2.11484e-05	0.558958	0.895	0.844	0.371281	Ifi27l2a
2.23046e-05	-0.265859	0.116	0.3	0.39158	Pecam1
2.25841e-05	0.628127	0.759	0.611	0.396486	Ly6c2
2.34793e-05	-0.262411	0.785	0.922	0.412202	Son
2.36362e-05	-0.252454	0.209	0.433	0.414956	Ddx42
2.39454e-05	0.366041	0.785	0.667	0.420386	Vamp8
2.53453e-05	-0.25287	0.186	0.4	0.444962	Ccdc82
2.68478e-05	-0.268397	0.471	0.689	0.471339	Senp6
2.7622e-05	-0.256603	0.381	0.633	0.484931	Hnrnpul2
2.8032e-05	-0.258009	0.474	0.711	0.492129	Thrap3
2.84077e-05	0.309816	0.863	0.8	0.498726	Polr1d
2.84098e-05	-0.257927	0.779	0.944	0.498762	Morf4l1
2.84501e-05	0.307176	0.936	0.933	0.49947	Sub1
2.97581e-05	0.446365	0.753	0.533	0.522433	Cd8a
3.05425e-05	-0.327283	0.128	0.311	0.536204	Ccr7
3.10833e-05	-0.314716	0.404	0.644	0.545698	Ythdc1
3.26376e-05	-0.253689	0.206	0.433	0.572986	Tbl1x
3.31092e-05	-0.285765	0.297	0.5	0.581264	Cdk13
3.48149e-05	-0.361099	0.032	0.144	0.611211	Igfbp4
3.57604e-05	-0.274585	0.241	0.467	0.62781	Cep350
3.85821e-05	0.370387	0.631	0.422	0.677348	Lrp10
4.11176e-05	-0.419992	0.235	0.422	0.721861	Gm20186
4.20755e-05	0.307962	0.686	0.533	0.738677	Cnp
4.30621e-05	0.303961	0.875	0.789	0.755998	Slc25a5
4.38423e-05	-0.256807	0.282	0.5	0.769696	Flii
5.25142e-05	-0.267737	0.16	0.344	0.92194	Aff4
5.33208e-05	-0.305036	0.494	0.689	0.936099	Bclaf1
6.05395e-05	-0.253887	0.154	0.333	1	Trim44
6.13259e-05	-0.268521	0.282	0.511	1	Ascc3
6.21941e-05	-0.284451	0.323	0.556	1	Rsf1
6.22994e-05	0.276949	0.965	0.911	1	Cotl1
6.33841e-05	-0.295271	0.416	0.622	1	Scaf11
6.62138e-05	0.282896	0.849	0.744	1	Atp6v1f
7.45402e-05	-0.323159	0.169	0.344	1	Zkscan3
7.51154e-05	-0.269746	0.174	0.356	1	Hltf
7.54536e-05	-0.25493	0.294	0.522	1	Baz1b
7.74592e-05	0.440088	0.904	0.833	1	Vim
8.01924e-05	-0.360367	0.18	0.356	1	Usp9x
8.3364e-05	0.275299	0.433	0.211	1	Ccl4
8.61552e-05	-0.280331	0.39	0.6	1	Lnpep
8.65406e-05	0.324585	0.823	0.733	1	Prelid1
9.30371e-05	0.356152	0.733	0.556	1	Cxcr3
9.39034e-05	0.31678	0.625	0.456	1	Nmi
0.00010131	0.347423	0.82	0.7	1	Anxa6
0.000105572	-0.260872	0.212	0.4	1	Abi1
0.000109943	-0.28501	0.343	0.533	1	Stk10
0.000112016	-0.334858	0.343	0.556	1	4932438A13Rik
0.000115226	-0.276583	0.07	0.2	1	Fam13b
0.000117538	-0.295445	0.25	0.444	1	Erap1
0.000120149	-0.292403	0.419	0.656	1	Wapl
0.000124756	-0.390653	0.544	0.7	1	Fubp1
0.000130342	-0.279445	0.209	0.4	1	Crtc3
0.000131736	-0.305517	0.279	0.478	1	Eml4
0.00013532	-0.295341	0.038	0.144	1	Ly86
0.00014249	0.277571	0.619	0.4	1	Spn
0.000142654	-0.318774	0.305	0.489	1	Pik3r1
0.000146511	0.291687	0.898	0.878	1	Ctsd
0.000150272	0.261784	0.945	0.867	1	Tmbim6
0.000162595	0.293368	0.762	0.578	1	Gimap7
0.000163809	-0.296685	0.192	0.367	1	Gnl3
0.000167363	-0.302301	0.532	0.711	1	Fnbp1
0.000177059	0.288406	0.692	0.511	1	Zfp706
0.000183799	-0.251228	0.166	0.344	1	Cwf19l2
0.00019013	-0.504525	0.331	0.511	1	Tcf7
0.000199884	-0.263132	0.235	0.422	1	Rbl2
0.000201918	0.25296	0.922	0.878	1	Myl12a
0.000215045	0.351302	0.692	0.544	1	Dbnl
0.000218245	0.257895	0.846	0.733	1	Sri
0.000226517	-0.275117	0.23	0.433	1	Zeb1
0.000228352	0.320291	0.823	0.644	1	Hopx
0.000233939	-0.270195	0.39	0.6	1	Rab8b
0.000248084	-0.286836	0.541	0.711	1	Hnrnpl
0.000256688	-0.2599	0.788	0.9	1	Srsf5
0.000266444	0.251862	0.887	0.822	1	Cox5b
0.000276337	-0.417229	0.791	0.867	1	Ets1
0.000277136	-0.263344	0.334	0.556	1	Zfp148
0.000286446	-0.27143	0.375	0.567	1	Tab2
0.000301554	-0.273876	0.631	0.789	1	Gm10076
0.000303586	0.2833	0.735	0.656	1	Mdh2
0.000303592	-0.303639	0.343	0.533	1	Kpna4
0.000305896	-0.272003	0.541	0.722	1	Nipbl
0.000306171	-0.541781	0.148	0.3	1	Tyrobp
0.000311815	-0.329143	0.773	0.911	1	Myh9
0.000317694	0.290013	0.901	0.833	1	Cnn2
0.000342995	0.396196	0.666	0.489	1	Rtp4
0.000343608	-0.305408	0.474	0.633	1	Chd4
0.000383073	0.306684	0.91	0.822	1	Psmb9
0.000384065	-0.258106	0.282	0.467	1	Eif4g1
0.000412606	0.439293	0.73	0.5	1	S100a4
0.00041456	0.327717	0.712	0.544	1	Pycard
0.000432399	-0.255497	0.395	0.589	1	Nucks1
0.000433075	-0.253772	0.049	0.156	1	Basp1
0.000446486	0.301962	0.858	0.833	1	Vasp
0.000448938	-0.306815	0.384	0.589	1	Nsd1
0.000451503	0.299216	0.602	0.467	1	BC031181
0.000454272	-0.279213	0.645	0.844	1	Rapgef6
0.000454273	-0.28226	0.672	0.744	1	Actr2
0.000465412	-0.338766	0.314	0.489	1	Add3
0.000483337	0.312812	0.782	0.7	1	Reep5
0.000500173	0.343613	0.695	0.544	1	Zbp1
0.000561273	-0.315054	0.16	0.3	1	Msh2
0.000573477	0.255795	0.837	0.722	1	Supt4a
0.000597094	0.321867	0.756	0.633	1	Mrps16
0.00060231	-0.292782	0.468	0.656	1	Chd2
0.00061559	0.331269	0.756	0.567	1	Cd8b1
0.000621016	-0.261223	0.709	0.844	1	Ablim1
0.000626403	-0.254457	0.413	0.578	1	Abcf1
0.000634826	0.29443	0.555	0.367	1	Rnh1
0.000642235	0.301134	0.68	0.5	1	Pstpip1
0.000647004	-0.283045	0.485	0.678	1	Chd3
0.000689912	0.270294	0.767	0.678	1	Ccdc12
0.000722193	0.297097	0.924	0.856	1	H2-T22
0.000793118	0.283463	0.843	0.744	1	Tap1
0.000800055	0.325107	0.634	0.511	1	Pld3
0.000832216	0.372647	0.666	0.533	1	Phf11b
0.000891174	-0.314634	0.241	0.4	1	Kcnq1ot1
0.000935657	0.32996	0.619	0.467	1	Cd6
0.000961895	-0.270479	0.703	0.878	1	Luc7l2
0.000987159	-0.385274	0.154	0.3	1	Selenop
0.00101608	0.895757	0.235	0.078	1	Gzma
0.0010456	-0.251153	0.378	0.544	1	Smc1a
0.0010707	0.265609	0.884	0.833	1	Ucp2
0.0010856	0.255544	0.564	0.411	1	Abhd17a
0.00113548	-0.262336	0.381	0.544	1	Brd1
0.00113994	-0.262248	0.343	0.522	1	Skil
0.00121754	-0.313701	0.177	0.333	1	Ikzf2
0.00126026	-0.319989	0.587	0.7	1	Ahnak
0.00128626	0.310024	0.558	0.411	1	Sra1
0.00128844	0.268234	0.698	0.544	1	Ech1
0.00130393	0.350601	0.468	0.311	1	Trafd1
0.00133906	-0.279414	0.462	0.644	1	Samd9l
0.00139636	0.285544	0.349	0.189	1	Tbx21
0.00139714	0.39791	0.509	0.344	1	Serpina3g
0.0014138	-0.275422	0.422	0.567	1	Zcchc7
0.00143632	0.262293	0.625	0.478	1	Tmem14c
0.00154076	0.256617	0.413	0.267	1	Dctn6
0.00155597	-0.446796	0.407	0.544	1	Klf2
0.00155817	-0.259648	0.424	0.567	1	Gstp1
0.0016015	0.341994	0.494	0.311	1	Icos
0.00163291	-0.33052	0.544	0.678	1	Arglu1
0.00171485	0.263391	0.817	0.689	1	Gm8369
0.00175756	-0.268363	0.087	0.2	1	Sh3bp5
0.00184567	0.279455	0.68	0.567	1	Wdr1
0.00185162	-0.260622	0.297	0.467	1	Sptan1
0.00185674	0.372516	0.733	0.6	1	Irf7
0.00197545	0.269179	0.471	0.333	1	Derl1
0.00203485	0.316094	0.721	0.544	1	Ctla2a
0.00205552	0.29807	0.715	0.578	1	Cxcr6
0.00207332	-0.252781	0.265	0.433	1	Emsy
0.00214638	-0.281466	0.355	0.522	1	Neurl3
0.00222416	-0.367861	0.535	0.678	1	Foxp1
0.00230669	0.250546	0.372	0.233	1	Bak1
0.00270198	0.269204	0.253	0.111	1	Hbb-bs
0.00271221	0.271274	0.436	0.311	1	Ube2a
0.00274145	-0.260884	0.703	0.8	1	Arl4c
0.0027623	-0.266675	0.544	0.689	1	Matr3
0.00302287	0.272113	0.262	0.111	1	Mx1
0.00365897	-0.301819	0.497	0.644	1	Parp14
0.00375379	-0.264225	0.305	0.456	1	2021-09-11
0.00384416	-0.252034	0.401	0.556	1	Ddx58
0.00387983	0.342409	0.73	0.644	1	Dusp2
0.00409736	-0.278651	0.279	0.411	1	Smg1
0.00422137	0.257684	0.625	0.489	1	Tkt
0.00431626	0.284319	0.247	0.111	1	Sdcbp2
0.0043749	-0.262156	0.224	0.367	1	Nin
0.0044276	0.46804	0.576	0.456	1	Plac8
0.00445904	0.280394	0.831	0.767	1	H2-Q6
0.00447997	-0.332197	0.526	0.633	1	Smc4
0.00466117	0.252682	0.698	0.567	1	Gng2
0.00470952	0.269033	0.552	0.4	1	Rhog
0.00503479	0.251561	0.538	0.433	1	Glipr2
0.00513271	-0.259354	0.448	0.6	1	Birc6
0.00518153	0.26478	0.413	0.267	1	Tuba1a
0.00535788	-0.255506	0.701	0.822	1	Pdia3
0.00560649	0.257134	0.654	0.589	1	Sys1
0.00564103	0.427264	0.445	0.3	1	Lag3
0.00590784	0.311085	0.779	0.756	1	Cd48
0.00609193	-0.316266	0.262	0.411	1	Jun
0.00618583	0.2513	0.456	0.344	1	Ddt
0.00629169	0.251342	0.398	0.267	1	Rpa2
0.00629511	0.303979	0.631	0.533	1	Zyx
0.00668759	-0.303303	0.424	0.556	1	Tgfbr2
0.00681463	0.264968	0.683	0.6	1	Zdhhc18
0.00694122	0.272653	0.602	0.5	1	Lgals3
0.00737782	0.266237	0.541	0.456	1	Uqcrc1
0.00750513	-1.0255	0.311	0.467	1	Apoe
0.00788198	0.293339	0.712	0.633	1	Pmepa1
0.00837676	0.273962	0.738	0.611	1	Igtp
0.00837931	0.308423	0.544	0.411	1	Jaml
0.00841706	0.253027	0.878	0.856	1	H2afz
0.0098943	0.282068	0.491	0.4	1	Gstp3
0.00993299	-0.262317	0.564	0.7	1	Tra2a
0.0108986	0.262788	0.593	0.444	1	2010111I01Rik
0.0110713	-0.334472	0.372	0.511	1	Txk
0.0111381	0.254571	0.355	0.244	1	Gatd1
0.011164	-0.490203	0.334	0.467	1	Gm12840
0.0111687	0.257758	0.587	0.489	1	Def6
0.0119673	-0.535534	0.186	0.3	1	H2-Aa
0.0127238	-0.302904	0.605	0.7	1	Emb
0.0136906	-0.328635	0.288	0.433	1	Klf3
0.0174407	-0.453518	0.241	0.356	1	Fcer1g
0.0181021	0.307645	0.512	0.433	1	Pglyrp1
0.0190382	0.296866	0.648	0.567	1	Isg20
0.0191446	0.302296	0.459	0.333	1	Gbp2
0.0198791	-0.282308	0.395	0.522	1	Slfn8
0.0200291	-0.268073	0.125	0.222	1	Ero1l
0.0225849	0.268296	0.328	0.233	1	2310001H17Rik
0.0231466	-0.395351	0.148	0.244	1	C1qc
0.0257868	-0.919723	0.366	0.5	1	Cd74
0.0284139	0.319802	0.422	0.322	1	Prf1
0.029255	-0.848962	0.288	0.389	1	Lyz2
0.0313545	-0.307967	0.247	0.356	1	Ms4a4c
0.0340247	0.285015	0.468	0.367	1	Slco3a1
0.0343953	-0.250219	0.541	0.656	1	Ifi208
0.0352141	-0.253059	0.442	0.556	1	Git2
0.0391235	0.321422	0.488	0.411	1	Glrx
0.0395349	0.252441	0.166	0.078	1	Ccl3
0.0449338	0.260691	0.308	0.233	1	Dapk2
0.050412	0.251679	0.419	0.311	1	Klrc1
0.0523323	0.317019	0.363	0.278	1	Ifng
0.0528392	0.30034	0.686	0.644	1	Itgb7
0.0529525	-0.405302	0.712	0.7	1	Junb
0.0537712	0.25291	0.84	0.756	1	Tagln2
0.0587088	-0.372708	0.256	0.356	1	Slfn5
0.0735269	-0.28905	0.102	0.167	1	Fos
0.0992207	-0.34633	0.192	0.267	1	Tcrg-C2
0.118122	0.262233	0.64	0.6	1	Socs1
0.138985	-0.525502	0.172	0.233	1	C1qa
0.166014	0.255759	0.526	0.467	1	Capg
0.212041	-0.677273	0.157	0.2	1	H2-Eb1
0.218278	-0.433014	0.218	0.267	1	C1qb
0.317278	-0.651453	0.212	0.244	1	H2-Ab1
0.449869	0.278929	0.549	0.578	1	Trbc1
0.893744	-0.301241	0.988	1	1	Fth1

## Sheet: DE genes CD47 vs Control
p_val	avg_logFC	pct.1	pct.2	p_val_adj	gene
1.51936e-08	-0.326812	0.935	0.978	0.000266738	Uba52
1.01225e-05	-0.329312	0.161	0.444	0.177711	Gm47283
1.98606e-05	0.741977	0.355	0.111	0.348673	Hbb-bs
0.000232873	-0.327637	0.629	0.789	1	Gm10076
0.000465293	0.445768	0.621	0.4	1	Spn
0.000659575	0.326384	0.831	0.6	1	S100a13
0.000781577	-0.263318	0.065	0.211	1	Pdxdc1
0.00118323	0.265844	0.524	0.311	1	Ube2k
0.00125046	-0.280923	0.21	0.389	1	Pdk1
0.00160771	0.284061	0.476	0.256	1	Bnip2
0.00178767	0.372886	0.597	0.411	1	Sra1
0.0021581	0.295911	0.29	0.111	1	Mx1
0.00231189	0.265404	0.919	0.844	1	Ppp1ca
0.0026231	0.394078	0.427	0.267	1	Gm12216
0.00273357	0.412436	0.935	0.911	1	S100a10
0.00278783	0.333111	0.75	0.578	1	Atp2b1
0.00285964	0.284848	0.758	0.633	1	Fyn
0.00389551	0.423699	0.927	0.933	1	Crip1
0.004194	-0.254209	0.46	0.611	1	Luc7l3
0.00425918	-0.310789	0.081	0.222	1	Trgv2
0.00430427	0.262783	0.79	0.656	1	Itga4
0.00467536	-0.268059	0.065	0.189	1	Arg1
0.00478043	-0.276139	0.573	0.711	1	Hnrnpl
0.00524366	-0.25865	0.452	0.6	1	Cyb5a
0.00538337	-0.504688	0.96	1	1	Fth1
0.00594666	0.365447	0.992	0.989	1	Actg1
0.00672049	0.277599	0.605	0.422	1	R3hdm1
0.00716243	0.301864	0.597	0.444	1	Sfr1
0.00717363	0.299878	0.492	0.322	1	Nmt1
0.01175	-0.308735	0.282	0.433	1	Emsy
0.0132874	-0.254963	0.056	0.156	1	Basp1
0.0133819	-0.430594	0.411	0.544	1	Satb1
0.0141727	0.296554	0.484	0.311	1	Cdc42ep3
0.0151567	0.264415	0.331	0.189	1	Tsg101
0.0163009	-0.265418	0.315	0.456	1	Anxa5
0.0164381	0.339186	0.823	0.811	1	Lgals1
0.0169577	-0.282156	0.121	0.244	1	Tnfrsf9
0.0171389	0.277964	0.476	0.3	1	mt-Atp8
0.0181015	0.299794	0.411	0.267	1	Tuba1a
0.0202386	0.363149	0.669	0.5	1	S100a4
0.022042	-0.299274	0.056	0.144	1	Ly86
0.0233511	0.26828	0.702	0.611	1	Pla2g16
0.0244626	-0.253554	0.056	0.144	1	Hist1h2ap
0.0251042	0.273329	0.419	0.289	1	Rnf115
0.0258497	0.259913	0.71	0.589	1	Slc9a3r1
0.0262451	-0.589183	0.185	0.3	1	H2-Aa
0.0271489	0.262074	0.5	0.367	1	Ptpn7
0.0279285	0.265364	0.556	0.422	1	Lrp10
0.0306484	0.43667	0.669	0.544	1	Tsc22d3
0.0336254	0.268298	0.605	0.489	1	Tkt
0.034265	0.254328	0.952	0.922	1	AW112010
0.0351811	0.32652	0.185	0.089	1	Egr1
0.035759	0.251707	0.597	0.489	1	Gm2682
0.0363892	0.306466	0.734	0.644	1	Itgb7
0.0400362	0.280844	0.387	0.267	1	Rpa2
0.0416279	-0.521015	0.145	0.244	1	C1qc
0.0446961	0.386248	0.702	0.644	1	S100a6
0.0482033	0.280987	0.347	0.222	1	Cept1
0.0500974	-0.877206	0.371	0.5	1	Cd74
0.0505321	0.264994	0.347	0.233	1	Runx2
0.0530342	-0.38956	0.347	0.467	1	Gm12840
0.0615522	0.342937	0.226	0.133	1	Pou2f2
0.0721989	0.254496	0.573	0.467	1	Ube2h
0.0773192	-0.505623	0.177	0.267	1	Tcrg-C2
0.085211	0.277431	0.839	0.8	1	Epsti1
0.0859829	-0.521451	0.121	0.2	1	Dapl1
0.0879204	0.867669	0.153	0.078	1	Gzma
0.091801	0.318969	0.435	0.367	1	Eif2ak2
0.0933746	-0.368589	0.258	0.356	1	Fcer1g
0.0984379	-0.268623	0.653	0.744	1	Ctss
0.112655	0.420905	0.758	0.667	1	Ccl5
0.118608	0.348655	0.379	0.322	1	Ass1
0.139287	-0.366353	0.46	0.489	1	Lef1
0.149825	-0.264387	0.153	0.222	1	Ero1l
0.150674	0.316955	0.556	0.522	1	Ttc39b
0.160226	-0.425075	0.242	0.311	1	Ifitm3
0.166372	-0.763032	0.339	0.389	1	Lyz2
0.17179	-0.269969	0.177	0.244	1	Fabp5
0.175946	0.422212	0.371	0.311	1	Gzmk
0.179311	-0.420302	0.25	0.3	1	Tyrobp
0.181073	-0.592717	0.21	0.267	1	C1qb
0.181446	0.264368	0.589	0.533	1	Irgm1
0.184456	0.477857	0.524	0.456	1	Plac8
0.187133	0.378223	0.516	0.456	1	Cd69
0.20691	-0.977427	0.387	0.467	1	Apoe
0.212718	-0.37165	0.298	0.356	1	Ms4a4c
0.231044	0.267312	0.621	0.578	1	Itgal
0.2516	0.263822	0.653	0.644	1	Pim1
0.281609	-0.584491	0.185	0.233	1	C1qa
0.311062	0.30296	0.532	0.522	1	Pde7a
0.332926	0.290626	0.46	0.433	1	Pglyrp1
0.343595	-0.271504	0.169	0.211	1	Klre1
0.381254	-0.410917	0.5	0.489	1	Tpi1
0.4646	-0.262222	0.976	0.967	1	Ftl1
0.486732	-0.651454	0.177	0.2	1	H2-Eb1
0.48842	-0.267698	0.315	0.356	1	Slfn5
0.56355	-0.261319	0.452	0.5	1	Lgals3
0.689347	-0.518726	0.242	0.244	1	H2-Ab1
0.800942	-0.344454	0.218	0.211	1	Ccl4

## Sheet: DE genes PD-L1 vs Control
p_val	avg_logFC	pct.1	pct.2	p_val_adj	gene
5.67742e-14	0.546789	0.978	0.989	9.96728e-10	Rpl13a
9.48558e-08	-0.364014	0.964	0.989	0.00166529	Rps26
3.73448e-07	-0.302042	0.986	0.989	0.00655625	Rpl35a
4.97092e-07	-0.593714	0.065	0.311	0.00872695	Ccr7
8.61798e-07	0.460866	0.986	0.922	0.0151297	AW112010
1.52289e-06	-0.441303	0.59	0.789	0.0267359	Gm10076
1.64271e-06	0.50761	0.993	0.989	0.0288394	Actg1
2.98963e-06	-0.263835	0.986	1	0.0524859	Rps3a1
4.38164e-06	0.426869	0.957	0.911	0.0769241	S100a10
1.10341e-05	0.360395	0.993	0.967	0.193715	H2-Q7
1.17769e-05	-0.343789	0.173	0.444	0.206755	Gm47283
1.6787e-05	0.344292	0.921	0.744	0.294713	Tap1
2.016e-05	0.362542	0.993	0.956	0.353929	Ms4a4b
2.04998e-05	-0.558238	0.129	0.356	0.359894	Sell
2.11149e-05	-0.663119	0.345	0.633	0.370692	Il7r
3.93529e-05	0.430767	0.827	0.7	0.690879	Runx3
4.25051e-05	-0.895255	0.036	0.2	0.74622	Dapl1
6.23502e-05	-0.312002	0.978	1	1	Rps20
6.61521e-05	-0.461518	0.165	0.389	1	Tspan32
6.79311e-05	0.330231	0.791	0.544	1	Zbp1
7.0987e-05	-0.259401	0.331	0.589	1	Banf1
7.45504e-05	-0.401699	0.633	0.8	1	Arl4c
8.412e-05	0.382471	0.856	0.667	1	Psmb10
8.41666e-05	0.380331	0.59	0.344	1	Mvb12a
0.000118328	-0.291477	0.964	1	1	Rpl35
0.000119846	0.391195	0.511	0.256	1	Gbp6
0.00012529	-0.451648	0.597	0.778	1	mt-Nd4l
0.00017287	-0.254157	0.95	0.989	1	Rpl36a
0.000184812	0.421579	0.784	0.556	1	Cxcr3
0.000228569	-0.296752	0.986	1	1	Rps29
0.000272692	0.509735	0.863	0.644	1	S100a6
0.000273724	0.35459	0.237	0.056	1	Pcnx3
0.000284542	0.419873	0.906	0.811	1	Lgals1
0.000310816	0.29761	0.928	0.933	1	Sub1
0.000341952	0.282013	0.971	0.911	1	Cotl1
0.00035663	-0.280813	0.187	0.389	1	Mphosph10
0.000385895	0.568815	0.863	0.844	1	Ifi27l2a
0.000400387	-0.284251	0.065	0.222	1	Wdr12
0.000402841	0.340215	0.957	0.967	1	Ms4a6b
0.000463503	-0.299226	0.806	0.9	1	mt-Nd5
0.00053323	0.60174	0.511	0.311	1	Gzmk
0.000553758	0.322744	0.662	0.467	1	Ap2s1
0.000566706	-0.261821	0.18	0.378	1	Nae1
0.000569831	0.313152	0.95	0.922	1	Selplg
0.00065959	0.758493	0.813	0.667	1	Ccl5
0.00066825	-0.263253	0.079	0.244	1	Rflnb
0.000701377	0.281856	0.374	0.178	1	Acsbg1
0.000753874	0.96549	0.259	0.078	1	Gzma
0.00079001	0.270322	0.892	0.8	1	Polr1d
0.00095559	0.314103	0.971	0.978	1	Laptm5
0.00105061	-0.579613	0.367	0.544	1	Satb1
0.00106908	0.251669	0.921	0.844	1	Ppp1ca
0.00108282	0.256568	0.957	0.889	1	H2-T23
0.00128836	0.422046	0.863	0.756	1	Ly6a
0.00130395	0.336064	0.77	0.611	1	Pla2g16
0.00137811	0.322891	0.604	0.422	1	Lrp10
0.00139109	-0.325172	0.381	0.544	1	Mob4
0.00143336	0.289103	0.252	0.089	1	Unc119b
0.00175001	-0.255858	0.978	1	1	mt-Nd4
0.00189268	0.256591	0.727	0.567	1	Pfkp
0.00194779	0.295474	0.597	0.4	1	Spn
0.00196506	0.350708	0.784	0.6	1	S100a13
0.00199895	0.2685	0.59	0.389	1	Sorl1
0.00207447	0.299794	0.374	0.189	1	Ubr4
0.00212656	-0.570519	0.396	0.544	1	Klf2
0.00253143	0.50254	0.712	0.544	1	Ctla2a
0.00264683	0.285012	0.942	0.811	1	Cd53
0.00280581	-0.259637	0.237	0.411	1	Impdh2
0.00288981	-0.287407	0.223	0.389	1	Pdk1
0.00291954	0.337666	0.741	0.578	1	Gimap7
0.00312913	-0.29585	0.252	0.422	1	C1qbp
0.00325801	-0.543449	0.353	0.489	1	Lef1
0.00327512	0.258482	0.669	0.533	1	Lpxn
0.00354657	-0.251136	0.396	0.533	1	Hdgf
0.00373544	0.563791	0.554	0.367	1	Gzmb
0.00389289	0.275033	0.597	0.433	1	Glipr2
0.0039464	-0.324449	0.165	0.322	1	Pik3ip1
0.00398382	0.361583	0.388	0.211	1	Serpinb9
0.0042449	0.324379	0.849	0.756	1	Nkg7
0.00487838	0.296177	0.856	0.733	1	Ptpn22
0.00494425	0.275875	0.417	0.244	1	Vps54
0.00510898	0.278967	0.784	0.7	1	Tapbp
0.00519282	-0.261754	0.777	0.867	1	Hnrnpu
0.00525701	0.29112	0.388	0.233	1	Dmtf1
0.00541657	0.295183	0.597	0.467	1	BC031181
0.00544551	0.254753	0.388	0.211	1	Tor3a
0.00574141	0.384606	0.482	0.311	1	Icos
0.00583774	0.253337	0.396	0.244	1	Unc13d
0.00594298	-0.255262	0.424	0.589	1	Akap9
0.00638695	0.420965	0.259	0.111	1	Mx1
0.00784433	0.305473	0.353	0.189	1	Dgat1
0.00789301	0.260098	0.41	0.267	1	Gm12216
0.00861103	-0.354357	0.496	0.633	1	Smc4
0.00908363	0.285763	0.46	0.311	1	Trafd1
0.0093441	0.412936	0.374	0.211	1	Ccl4
0.0107085	0.291592	0.46	0.3	1	Ccr5
0.0110525	0.30728	0.381	0.233	1	Runx2
0.0111774	-0.265817	0.158	0.3	1	Selenop
0.01168	0.312458	0.554	0.389	1	Atxn1
0.0117961	0.262974	0.712	0.567	1	Wdr1
0.0118054	0.30677	0.554	0.378	1	Bcl2a1d
0.0122462	0.400439	0.669	0.5	1	S100a4
0.0125253	-0.256373	0.547	0.722	1	Cdkn1b
0.0125703	-0.26705	0.173	0.3	1	Msh2
0.0130886	0.258013	0.561	0.4	1	Baz1a
0.0132414	-0.268762	0.41	0.522	1	Mrpl23
0.0145288	0.253787	0.388	0.244	1	St3gal6
0.0151358	0.279702	0.576	0.444	1	Lbh
0.0153006	-0.263237	0.201	0.322	1	Ssbp2
0.0163461	0.259696	0.921	0.933	1	Crip1
0.0164518	-0.261777	0.309	0.444	1	Erap1
0.0167687	0.263872	0.489	0.367	1	Nab1
0.0168409	0.258698	0.388	0.256	1	Batf
0.0173057	0.269606	0.504	0.367	1	Ptpn7
0.0181669	0.307014	0.561	0.411	1	Jaml
0.0188255	0.254609	0.719	0.589	1	Slc9a3r1
0.0194539	0.281573	0.813	0.711	1	Smchd1
0.0199468	0.332571	0.432	0.322	1	Prf1
0.02064	-0.263817	0.439	0.244	1	H2-Ab1
0.0218789	0.257104	0.676	0.578	1	Itgal
0.0220338	-0.386898	0.381	0.511	1	Tcf7
0.0220389	0.263076	0.353	0.233	1	2310001H17Rik
0.0223586	0.319447	0.353	0.211	1	Serpinb6b
0.0232706	0.271551	0.791	0.667	1	Sp110
0.0240882	-0.425764	0.058	0.144	1	Igfbp4
0.0243441	-0.288017	0.259	0.367	1	Pfkl
0.0259508	0.317389	0.755	0.667	1	Gbp7
0.0284095	-0.292528	0.547	0.589	1	Ddx21
0.0286678	0.257107	0.432	0.3	1	Tle3
0.0304692	0.424218	0.576	0.456	1	Plac8
0.0310411	0.27491	0.504	0.422	1	Pold4
0.0315741	0.267414	0.496	0.4	1	Cmip
0.0321107	0.29709	0.871	0.811	1	Samhd1
0.0339054	0.289104	0.295	0.178	1	Gem
0.0352312	0.266684	0.403	0.278	1	Epn1
0.0365761	0.381044	0.655	0.522	1	Slc3a2
0.0369907	-0.276075	0.122	0.222	1	Trgv2
0.0397811	0.259588	0.741	0.644	1	Id2
0.0413015	0.25613	0.295	0.178	1	Ing4
0.0482609	0.267352	0.561	0.478	1	Igbp1
0.0519248	0.269606	0.683	0.589	1	Trim30a
0.0533772	-0.275248	0.619	0.678	1	Foxp1
0.0567825	0.25466	0.511	0.389	1	Pdcd1
0.0640921	0.260783	0.345	0.244	1	Oas3
0.0710221	0.422007	0.432	0.367	1	Eif2ak2
0.0751083	0.27249	0.453	0.367	1	Slco3a1
0.0812126	0.26791	0.77	0.7	1	Anxa6
0.0814735	0.273104	0.432	0.344	1	Serpina3g
0.0875121	0.28198	0.115	0.2	1	Cxcl10
0.103386	-0.376205	0.986	1	1	Fth1
0.123153	-0.502928	0.583	0.467	1	Apoe
0.145827	-0.489374	0.201	0.267	1	Tcrg-C2
0.168494	0.254854	0.367	0.3	1	Rnf145
0.175691	0.253998	0.583	0.522	1	AC149090.1
0.185398	-0.293783	0.302	0.2	1	H2-Eb1
0.186584	0.284215	0.367	0.322	1	Fcho2
0.187488	0.267342	0.655	0.644	1	Itgb7
0.269427	-0.512994	0.504	0.389	1	Lyz2
0.270035	0.34784	0.568	0.578	1	Trbc1
0.383164	-0.259368	0.302	0.233	1	C1qa
0.505711	0.251391	0.619	0.578	1	Slc38a2
0.561478	-0.551587	0.547	0.5	1	Cd74
0.576813	0.877882	0.295	0.278	1	Ifng
0.656893	0.391856	0.201	0.233	1	Ifitm2
0.723824	-0.299515	0.245	0.244	1	C1qc
0.837929	-0.329216	0.309	0.267	1	C1qb
0.889518	-0.367417	0.338	0.3	1	H2-Aa

## Sheet: DE genes Combo vs Control
p_val	avg_logFC	pct.1	pct.2	p_val_adj	gene
4.85583e-27	1.2517	0.883	0.111	8.5249e-23	Hbb-bs
1.87325e-12	0.741062	0.432	0	3.28867e-08	Hbb-bt
1.48951e-09	0.487523	0.396	0.033	2.61498e-05	Hba-a1
1.91552e-07	0.493493	0.324	0.033	0.00336289	Hba-a2
2.37481e-07	0.389004	0.973	0.989	0.00416922	Rpl13a
3.03194e-06	0.408925	0.991	0.956	0.0532287	Ms4a4b
1.12193e-05	-0.552938	0.577	0.778	0.196967	mt-Nd4l
1.71426e-05	0.412621	0.991	0.967	0.300956	H2-Q7
3.50664e-05	0.401148	0.856	0.7	0.615625	Anxa6
8.63663e-05	0.428445	0.766	0.589	1	Slc9a3r1
0.000108229	0.402503	0.694	0.4	1	Spn
0.000157481	-0.306667	0.811	0.944	1	Morf4l1
0.000158979	0.309466	0.946	0.922	1	Selplg
0.000166882	-0.660537	0.387	0.633	1	Il7r
0.000203047	-0.373918	0.414	0.589	1	Ash1l
0.000218908	-0.30977	0.667	0.856	1	Mycbp2
0.00025335	-0.270269	0.072	0.256	1	Etfdh
0.000302734	-0.430491	0.559	0.7	1	Fubp1
0.000305072	0.367111	0.865	0.8	1	Epsti1
0.000401087	-0.296172	0.315	0.556	1	Frg1
0.000458667	0.466691	0.315	0.111	1	Mx1
0.000476386	-0.302929	0.171	0.378	1	Mga
0.000511206	-0.254654	0.153	0.356	1	Zfp266
0.000521223	0.378201	0.811	0.6	1	S100a13
0.000542089	-0.327276	0.387	0.589	1	Nucks1
0.000567839	-0.2506	0.09	0.278	1	Mxi1
0.00062345	0.319001	0.811	0.778	1	Rnaset2b
0.000642247	0.45719	0.946	0.933	1	Crip1
0.000652103	-0.262222	0.369	0.633	1	Cblb
0.000719463	0.25617	0.414	0.2	1	Aph1a
0.000763481	-0.33368	0.694	0.789	1	Gm10076
0.000867723	0.592435	0.91	0.844	1	Ifi27l2a
0.000874397	-0.346091	0.405	0.622	1	Sptbn1
0.00098062	-0.251646	0.189	0.378	1	Dyrk1a
0.00104614	-0.347763	0.486	0.644	1	Top2b
0.00107763	-0.29565	0.559	0.689	1	Senp6
0.00112249	-0.285657	0.441	0.633	1	Hnrnpul2
0.00113613	0.352331	0.973	0.922	1	AW112010
0.0012382	0.257714	0.973	0.956	1	Rac2
0.00125978	-0.251784	0.982	1	1	Rps29
0.00127769	-0.334885	0.36	0.556	1	Rsf1
0.00133773	-0.302395	0.36	0.578	1	Cirbp
0.00138872	0.300478	0.973	0.967	1	Ms4a6b
0.00158403	-0.386698	0.432	0.589	1	Ddx21
0.0016009	-0.287126	0.27	0.444	1	Bccip
0.00167756	-0.253738	0.036	0.167	1	Nsun6
0.00184021	-0.320024	0.189	0.389	1	Tspan32
0.00185659	-0.5275	0.342	0.544	1	Satb1
0.00185799	-0.28455	0.351	0.511	1	Tcea1
0.00191284	0.259188	0.838	0.7	1	Reep5
0.00200094	0.282824	0.766	0.544	1	Zbp1
0.00207362	-0.251999	0.324	0.544	1	Zc3h7a
0.00216348	0.60013	0.829	0.667	1	Ccl5
0.00219278	-0.254765	0.378	0.556	1	Setx
0.0023404	-0.257045	0.387	0.567	1	Tlk1
0.00247058	-0.273564	0.829	0.867	1	Hnrnpu
0.00251828	-0.335162	0.667	0.822	1	Pdia3
0.00273259	-0.296848	0.369	0.544	1	Rbpj
0.00283193	-0.278585	0.252	0.433	1	Cdk12
0.00283979	-0.252744	0.252	0.444	1	Cabin1
0.00303117	0.383837	0.946	0.911	1	S100a10
0.00318312	0.337762	0.766	0.611	1	Pla2g16
0.00325688	-0.267487	0.153	0.311	1	Dgkd
0.00344395	-0.267343	0.486	0.622	1	Stag2
0.00346593	-0.262559	0.36	0.533	1	Sesn3
0.00357821	-0.255162	0.243	0.422	1	Clec2i
0.00358854	-0.259029	0.396	0.6	1	Srsf10
0.00367564	-0.254121	0.306	0.478	1	Msi2
0.00387091	-0.319162	0.432	0.6	1	Sltm
0.00389998	-0.3063	0.198	0.356	1	Strn3
0.00404693	-0.305407	0.577	0.733	1	Btg2
0.0041473	-0.284337	0.838	0.889	1	Ncl
0.0042344	-0.329804	0.261	0.433	1	Emsy
0.00426885	-0.251343	0.396	0.567	1	Rasgrp1
0.00464698	0.307609	0.856	0.744	1	Tap1
0.00473255	-0.275366	0.468	0.6	1	Rcsd1
0.00486772	-0.33926	0.595	0.722	1	Cdkn1b
0.00492596	-0.251494	0.108	0.256	1	Apol7e
0.00496266	0.312154	0.865	0.756	1	Nkg7
0.00503069	0.303454	0.676	0.544	1	Dbnl
0.00507729	0.507401	0.811	0.644	1	S100a6
0.00523305	-0.28499	0.514	0.667	1	Prpf40a
0.00546904	-0.280914	0.288	0.478	1	Susd6
0.005642	-0.271335	0.658	0.822	1	Pak2
0.00576968	0.299172	0.757	0.6	1	Zdhhc18
0.00580268	-0.258257	0.099	0.233	1	Ltn1
0.00583923	-0.261929	0.243	0.411	1	Senp7
0.0059102	-0.256361	0.423	0.578	1	Abcf1
0.00603614	0.305474	0.991	0.989	1	Actg1
0.00641827	0.302753	0.829	0.7	1	Runx3
0.0069066	-0.322941	0.595	0.7	1	Tra2a
0.00738893	-0.289856	0.82	0.878	1	Luc7l2
0.00777502	0.995	0.216	0.078	1	Gzma
0.00783786	0.252274	0.928	0.889	1	Ptprcap
0.00787461	-0.261619	0.153	0.289	1	Luc7l
0.00828944	-0.256123	0.297	0.478	1	Sp3
0.00883498	0.269101	0.441	0.278	1	Phc2
0.00931818	0.27682	0.802	0.667	1	1810037I17Rik
0.00935157	0.393748	0.748	0.644	1	Id2
0.00968541	0.90764	0.523	0.367	1	Gzmb
0.0099063	-0.260752	0.216	0.367	1	Gnl3
0.0105306	0.365238	0.468	0.311	1	Trafd1
0.0106243	0.301544	0.541	0.367	1	Slco3a1
0.0107477	0.323066	0.694	0.544	1	Pycard
0.0111425	-0.280994	0.369	0.489	1	Numa1
0.011741	0.353399	0.748	0.644	1	Itgb7
0.0119945	-0.39356	0.099	0.222	1	Trgv2
0.0120889	-0.263611	0.144	0.267	1	Tet2
0.0121113	0.332629	0.387	0.233	1	Tmc6
0.0129334	0.298573	0.586	0.478	1	Il10rb
0.013101	-0.257115	0.324	0.456	1	Mef2a
0.0135711	0.254228	0.414	0.256	1	Batf
0.0140855	0.269801	0.793	0.7	1	Tapbp
0.014163	0.272103	0.784	0.6	1	Mdh1
0.0145746	0.278574	0.441	0.3	1	Cers4
0.0151922	-0.273521	0.171	0.289	1	Taf1
0.0153944	0.430481	0.387	0.244	1	Oas3
0.0154367	0.44115	0.856	0.811	1	Lgals1
0.0158554	-0.720127	0.09	0.2	1	Dapl1
0.0160052	-0.343909	0.45	0.544	1	Inpp4b
0.0174093	0.265347	0.261	0.133	1	Pou2f2
0.0186621	-0.312127	0.55	0.656	1	Macf1
0.0190463	-0.289797	0.414	0.533	1	U2surp
0.0192838	0.416919	0.45	0.311	1	Gzmk
0.0198329	-0.252487	0.459	0.589	1	Akap9
0.0202757	-0.271887	0.541	0.656	1	Chd2
0.0203581	0.397441	0.613	0.456	1	Plac8
0.0216467	0.300985	0.766	0.611	1	Igtp
0.02167	0.26503	0.901	0.756	1	Gmfg
0.0219008	0.2589	0.568	0.433	1	Rnf138
0.0225679	-0.271634	0.207	0.356	1	Sell
0.023551	0.296998	0.64	0.533	1	Phf11b
0.0242427	-0.255898	0.054	0.144	1	Hist1h2ap
0.0244181	-0.252474	0.541	0.656	1	Ppp2r5a
0.0252358	0.258937	0.685	0.533	1	Cd8a
0.0264439	-0.275833	0.054	0.144	1	Ly86
0.0284591	-0.661487	0.153	0.267	1	Tcrg-C2
0.0296298	0.311314	0.622	0.5	1	Gbp4
0.0302052	-0.264549	0.189	0.3	1	Pecam1
0.0366308	0.251014	0.387	0.256	1	Gbp6
0.0369801	-0.261564	0.36	0.478	1	Eml4
0.0392006	0.252411	0.973	0.889	1	H2-T23
0.0392425	0.415048	0.649	0.5	1	S100a4
0.040487	-0.262574	0.252	0.344	1	Zkscan3
0.0428435	0.303453	0.91	0.811	1	Samhd1
0.0452598	0.319221	0.459	0.333	1	Gbp2
0.0470377	0.257955	0.748	0.644	1	Prr13
0.0488231	0.345292	0.333	0.211	1	Tor3a
0.0547349	0.253679	0.766	0.7	1	Hsp90aa1
0.0562994	-0.360302	0.117	0.211	1	Klre1
0.0581404	0.273068	0.369	0.267	1	Gm12216
0.0660214	0.257469	0.676	0.567	1	Cd8b1
0.0675936	0.261134	0.45	0.344	1	Serpina3g
0.0689887	-0.265091	0.541	0.633	1	Smc4
0.069603	-0.279903	0.586	0.678	1	Foxp1
0.0708869	0.277619	0.423	0.322	1	Phf11c
0.0827285	0.2529	0.333	0.244	1	Stk39
0.083326	0.261114	0.505	0.433	1	Pglyrp1
0.0852613	0.283465	0.541	0.433	1	Ifi214
0.0914056	0.381426	0.613	0.489	1	Isg15
0.1023	-0.253167	0.207	0.3	1	Tyrobp
0.104634	0.278855	0.676	0.544	1	Ctla2a
0.106016	0.266101	0.82	0.867	1	Hmgb2
0.115785	-0.250392	0.225	0.3	1	Zbtb20
0.133868	0.298222	0.559	0.456	1	Gm26740
0.145889	0.403539	0.631	0.611	1	Ly6c2
0.149024	-0.263568	0.369	0.467	1	Gm12840
0.151782	-0.372496	0.396	0.5	1	Cd74
0.161877	0.399657	0.577	0.578	1	Trbc1
0.162899	-0.363641	0.739	0.7	1	Junb
0.172172	0.317727	0.784	0.756	1	Ly6a
0.188189	-0.255151	0.541	0.556	1	Tgfbr2
0.199037	0.317129	0.784	0.756	1	Cd48
0.200517	0.559249	0.135	0.078	1	Ecm1
0.235536	-0.294513	0.477	0.489	1	Lef1
0.253488	0.286524	0.532	0.467	1	Ifit1
0.262461	0.255805	0.532	0.433	1	Daxx
0.290595	0.330556	0.405	0.367	1	Eif2ak2
0.304302	0.278746	0.405	0.356	1	Usp18
0.312457	0.385979	0.153	0.111	1	Tmem80
0.375363	0.258237	0.342	0.311	1	Casp3
0.499543	-0.350509	0.432	0.467	1	Apoe
0.610571	0.324053	0.261	0.233	1	Iigp1
0.809599	0.38916	0.18	0.2	1	Cxcl10
0.970942	-0.428006	0.27	0.244	1	H2-Ab1
0.998618	-0.257362	0.207	0.2	1	H2-Eb1

## Sheet: TopGO analysis BisAb vs Control
GO.ID	Term	Annotated	Significant	Expected	Rank in Fisher.classic	Fisher.elim	Fisher.classic	Sig.Gene
GO:0071346	cellular response to interferon-gamma	103	10	1.02	16	7.4e-08	7.4e-08	Actg1 / Ccl3 / Ccl4 / Ccl5 / Gbp2 / H2-Q7 / Nmi / Vamp8 / Vim / Zyx
GO:0002476	antigen processing and presentation of endogenous peptide antigen via MHC class Ib	16	4	0.16	49	1.6e-05	1.6e-05	H2-K1 / H2-Q6 / H2-Q7 / H2-T22
GO:0051607	defense response to virus	188	10	1.87	53	1.8e-05	1.8e-05	Ccl5 / Cd8a / Irf7 / Isg20 / Mx1 / Prf1 / Pycard / Rtp4 / Spn / Zbp1
GO:0048245	eosinophil chemotaxis	19	4	0.19	60	3.2e-05	3.2e-05	Ccl4 / Ccl5 / Dapk2 / Lgals3
GO:0019835	cytolysis	26	4	0.26	75	0.00012	0.00012	Gzma / Gzmb / Pglyrp1 / Prf1
GO:0032760	positive regulation of tumor necrosis factor production	83	6	0.83	82	0.00018	0.00018	Ccl3 / Ccl4 / Cyba / Ddt / Pycard / Spn
GO:0001771	immunological synapse formation	12	3	0.12	85	0.0002	0.0002	Cd6 / Lgals3 / Prf1
GO:0001916	positive regulation of T cell mediated cytotoxicity	31	4	0.31	89	0.00024	0.00024	H2-K1 / H2-Q6 / H2-Q7 / H2-T22
GO:0030593	neutrophil chemotaxis	82	8	0.82	28	0.00029	1.5e-06	Ccl3 / Ccl4 / Ccl5 / Dapk2 / Jaml / Lgals3 / Rac1 / Rac2
GO:0016601	Rac protein signal transduction	34	4	0.34	99	0.00035	0.00035	Dbnl / Rac1 / Rac2 / Rhog
GO:0050777	negative regulation of immune response	132	7	1.31	102	0.00035	0.00035	Lgals3 / Nmi / Pglyrp1 / Spn / Tap1 / Tbx21 / Trafd1
GO:0048246	macrophage chemotaxis	37	4	0.37	111	0.00048	0.00048	Ccl3 / Ccl5 / Ddt / Lgals3
GO:0051928	positive regulation of calcium ion transport	101	6	1	114	0.00051	0.00051	Bak1 / Ccl4 / Ccl5 / Cxcr3 / Lgals3 / Sri
GO:0050863	regulation of T cell activation	272	14	2.71	21	0.00057	5.4e-07	Ccl5 / Cd6 / Ctla2a / Icos / Lag3 / Lat / Lck / Lgals1 / Lgals3 / Prelid1 / Pycard / Rac2 / Spn / Tbx21
GO:0051881	regulation of mitochondrial membrane potential	70	5	0.7	120	0.00065	0.00065	Bak1 / Clic1 / Prelid1 / Ubb / Ucp2
GO:0002250	adaptive immune response	360	18	3.58	9	0.00066	1.8e-08	Cd3d / Cd48 / Cd8a / Cd8b1 / Dbnl / Gzmb / H2-K1 / H2-Q6 / H2-Q7 / H2-T22 / Irf7 / Lat / Prf1 / Pycard / Serpina3g / Spn / Tap1 / Tbx21
GO:0002456	T cell mediated immunity	106	9	1.05	25	0.0008	1.1e-06	Cd8a / Gzmb / H2-K1 / H2-Q6 / H2-Q7 / H2-T22 / Prf1 / Spn / Tbx21
GO:0033864	positive regulation of NAD(P)H oxidase activity	5	2	0.05	128	0.00096	0.00096	Cyba / Gnai2
GO:0071593	lymphocyte aggregation	5	2	0.05	129	0.00096	0.00096	Rac2 / Spn
GO:0002548	monocyte chemotaxis	45	4	0.45	133	0.00102	0.00102	Ccl3 / Ccl4 / Ccl5 / Lgals3
GO:0090023	positive regulation of neutrophil chemotaxis	22	3	0.22	147	0.00129	0.00129	Dapk2 / Rac1 / Rac2
GO:0097190	apoptotic signaling pathway	541	18	5.38	41	0.00138	7e-06	Anxa6 / Bak1 / Crip1 / Dapk2 / Gnai2 / Gzmb / Ifi27l2a / Lck / Lgals3 / Ppp1ca / Prelid1 / Pycard / Shisa5 / Slc25a5 / Slc9a3r1 / Spn / Tmbim6 / Ubb
GO:0034112	positive regulation of homotypic cell-cell adhesion	6	2	0.06	153	0.00144	0.00144	Ccl5 / Lgals1
GO:2000501	regulation of natural killer cell chemotaxis	6	2	0.06	154	0.00144	0.00144	Ccl4 / Ccl5
GO:0010499	proteasomal ubiquitin-independent protein catabolic process	23	3	0.23	156	0.00148	0.00148	Psmb10 / Psmb3 / Psmb9
GO:0045123	cellular extravasation	50	4	0.5	157	0.00152	0.00152	Ccl5 / Jaml / Selplg / Spn
GO:0031348	negative regulation of defense response	171	7	1.7	161	0.00161	0.00161	Ctla2a / Nmi / Pglyrp1 / Pycard / Spn / Tap1 / Trafd1
GO:0031295	T cell costimulation	25	3	0.25	169	0.00189	0.00189	Icos / Lgals1 / Spn
GO:0032074	negative regulation of nuclease activity	7	2	0.07	172	0.002	0.002	Gzma / Tmbim6
GO:0007191	adenylate cyclase-activating dopamine receptor signaling pathway	7	2	0.07	173	0.002	0.002	Gng2 / Slc9a3r1
GO:0042742	defense response to bacterium	182	7	1.81	179	0.00229	0.00229	Cyba / Gbp2 / H2-K1 / Pglyrp1 / Plac8 / Pycard / Spn
GO:0051283	negative regulation of sequestering of calcium ion	94	5	0.94	185	0.00245	0.00245	Anxa6 / Cxcr3 / Cyba / Lck / Sri
GO:0051250	negative regulation of lymphocyte activation	137	6	1.36	186	0.00247	0.00247	Id2 / Lag3 / Lgals3 / Pglyrp1 / Spn / Tbx21
GO:0008360	regulation of cell shape	138	6	1.37	187	0.00256	0.00256	Ccl3 / Myl12a / Rhog / S100a13 / Slc9a3r1 / Wdr1
GO:0045087	innate immune response	556	23	5.53	7	0.00258	6.1e-09	Actg1 / Ccl3 / Ccl4 / Ccl5 / Cyba / Gbp2 / Gzmb / H2-Q7 / Irf7 / Isg20 / Lag3 / Lgals3 / Mx1 / Nmi / Pglyrp1 / Pstpip1 / Pycard / Tap1 / Trafd1 / Vamp8 / Vim / Zbp1 / Zyx
GO:0060753	regulation of mast cell chemotaxis	8	2	0.08	195	0.00265	0.00265	Ccl5 / Rac2
GO:0019885	antigen processing and presentation of endogenous peptide antigen via MHC class I	8	2	0.08	196	0.00265	0.00265	H2-K1 / Tap1
GO:0042590	antigen processing and presentation of exogenous peptide antigen via MHC class I	8	2	0.08	197	0.00265	0.00265	H2-K1 / Tap1
GO:0070374	positive regulation of ERK1 and ERK2 cascade	189	7	1.88	202	0.00283	0.00283	Ccl3 / Ccl4 / Ccl5 / Ddt / Glipr2 / Gnai2 / Pycard
GO:0072659	protein localization to plasma membrane	245	8	2.44	207	0.00314	0.00314	Lgals3 / Myl12a / Rac1 / Rhog / S100a10 / Slc9a3r1 / Sys1 / Vamp8
GO:0060263	regulation of respiratory burst	9	2	0.09	211	0.00338	0.00338	Rac1 / Rac2
GO:0043922	negative regulation by host of viral transcription	9	2	0.09	212	0.00338	0.00338	Ccl4 / Ccl5
GO:2000406	positive regulation of T cell migration	31	3	0.31	215	0.00353	0.00353	Ccl5 / Pycard / Spn
GO:0007157	heterophilic cell-cell adhesion via plasma membrane cell adhesion molecules	32	3	0.32	220	0.00387	0.00387	Cd6 / Jaml / Lgals1
GO:0071347	cellular response to interleukin-1	66	4	0.66	224	0.0042	0.0042	Ccl3 / Ccl4 / Ccl5 / Pycard
GO:0042129	regulation of T cell proliferation	153	6	1.52	226	0.00426	0.00426	Ccl5 / Cd6 / Lgals3 / Pycard / Rac2 / Spn
GO:0002697	regulation of immune effector process	340	15	3.38	27	0.00438	1.5e-06	Ccl5 / H2-K1 / H2-Q6 / H2-Q7 / H2-T22 / Lag3 / Lgals3 / Pglyrp1 / Pycard / Rac2 / Spn / Tap1 / Tbx21 / Tmbim6 / Vamp8
GO:2001242	regulation of intrinsic apoptotic signaling pathway	154	6	1.53	228	0.0044	0.0044	Dapk2 / Lck / Pycard / Slc9a3r1 / Tmbim6 / Ubb
GO:0050729	positive regulation of inflammatory response	109	5	1.08	232	0.00464	0.00464	Ccl3 / Ccl5 / Cd6 / Ddt / Vamp8
GO:0043368	positive T cell selection	35	3	0.35	239	0.005	0.005	Cd3d / Spn / Tbx21
GO:0010523	negative regulation of calcium ion transport into cytosol	11	2	0.11	241	0.0051	0.0051	Sri / Tmbim6
GO:0006857	oligopeptide transport	11	2	0.11	242	0.0051	0.0051	Slc9a3r1 / Slco3a1
GO:0060340	positive regulation of type I interferon-mediated signaling pathway	11	2	0.11	243	0.0051	0.0051	Irf7 / Zbp1
GO:0006839	mitochondrial transport	159	6	1.58	244	0.00513	0.00513	Bak1 / Cnp / Cox5b / Slc25a5 / Tmem14c / Ucp2
GO:0008284	positive regulation of cell proliferation	788	16	7.84	247	0.00518	0.00518	Ccl5 / Cd6 / Cxcr3 / Cyba / Gnai2 / Id2 / Jaml / Lgals3 / Plac8 / Pycard / Rac2 / S100a13 / Slc25a5 / Spn / Ube2a / Vim
GO:0009605	response to external stimulus	1643	46	16.34	4	0.00535	2.7e-11	Bak1 / Ccl3 / Ccl4 / Ccl5 / Cd52 / Cd6 / Cd8a / Cnn2 / Cotl1 / Ctla2a / Cxcr3 / Cxcr6 / Cyba / Dapk2 / Ddt / Gbp2 / Gzma / H2-K1 / Hopx / Id2 / Ifi27l2a / Irf7 / Isg20 / Jaml / Lck / Lgals3 / Lsp1 / Ly6a / Mx1 / Pglyrp1 / Pla2g16 / Plac8 / Ppp1ca / Prf1 / Psmb9 / Pycard / Rac1 / Rac2 / Rhog / Rtp4 / Spn / Tmbim6 / Vamp8 / Vasp / Vim / Zbp1
GO:0006919	activation of cysteine-type endopeptidase activity involved in apoptotic process	71	4	0.71	252	0.00545	0.00545	Bak1 / Ifi27l2a / Lck / Pycard
GO:0045619	regulation of lymphocyte differentiation	164	6	1.63	261	0.00595	0.00595	Ctla2a / Id2 / Lck / Pglyrp1 / Prelid1 / Tbx21
GO:0007204	positive regulation of cytosolic calcium ion concentration	231	9	2.3	113	0.00602	0.00051	Bak1 / Ccl3 / Cd52 / Cxcr3 / Cxcr6 / Cyba / Lck / Sri / Tmbim6
GO:0070254	mucus secretion	12	2	0.12	262	0.00607	0.00607	Cyba / Vamp8
GO:0031032	actomyosin structure organization	165	6	1.64	264	0.00613	0.00613	Actg1 / Cnn2 / Rac1 / S100a10 / Wdr1 / Zyx
GO:2001235	positive regulation of apoptotic signaling pathway	165	6	1.64	265	0.00613	0.00613	Bak1 / Lck / Ppp1ca / Pycard / Slc9a3r1 / Ubb
GO:0060612	adipose tissue development	38	3	0.38	266	0.0063	0.0063	Id2 / Pla2g16 / Ubb
GO:0043303	mast cell degranulation	39	3	0.39	269	0.00678	0.00678	Lat / Rac2 / Vamp8
GO:0097178	ruffle assembly	39	3	0.39	270	0.00678	0.00678	Dbnl / Rac1 / Rhog
GO:0001909	leukocyte mediated cytotoxicity	109	8	1.08	47	0.00693	1.3e-05	Gzmb / H2-K1 / H2-Q6 / H2-Q7 / H2-T22 / Lag3 / Prf1 / Tap1
GO:0001818	negative regulation of cytokine production	224	7	2.23	273	0.00711	0.00711	Lag3 / Nmi / Pglyrp1 / Pycard / Rac1 / Srgn / Tbx21
GO:0097202	activation of cysteine-type endopeptidase activity	13	2	0.13	274	0.00713	0.00713	Bak1 / Pycard
GO:0010642	negative regulation of platelet-derived growth factor receptor signaling pathway	13	2	0.13	275	0.00713	0.00713	Glrx / Slc9a3r1
GO:0051712	positive regulation of killing of cells of other organism	13	2	0.13	276	0.00713	0.00713	Pglyrp1 / Prf1
GO:1903037	regulation of leukocyte cell-cell adhesion	254	10	2.53	87	0.00721	0.00023	Ccl5 / Cd6 / Icos / Lag3 / Lck / Lgals1 / Lgals3 / Pycard / Spn / Tbx21
GO:0019722	calcium-mediated signaling	173	6	1.72	287	0.00767	0.00767	Ccl4 / Cd8a / Cxcr3 / Cxcr6 / Lat / Sri
GO:0002366	leukocyte activation involved in immune response	216	9	2.15	96	0.00783	0.00031	Lat / Lgals1 / Lgals3 / Pglyrp1 / Pycard / Rac2 / Spn / Tbx21 / Vamp8
GO:0006954	inflammatory response	532	15	5.29	92	0.00805	0.00027	Ccl3 / Ccl4 / Ccl5 / Cd6 / Ctla2a / Cxcr3 / Cxcr6 / Cyba / Ddt / Lat / Pglyrp1 / Pstpip1 / Pycard / Spn / Vamp8
GO:0045351	type I interferon biosynthetic process	14	2	0.14	291	0.00827	0.00827	Irf7 / Nmi
GO:0002707	negative regulation of lymphocyte mediated immunity	42	3	0.42	293	0.00833	0.00833	Spn / Tap1 / Tbx21
GO:0034220	ion transmembrane transport	616	13	6.13	296	0.00847	0.00847	Anxa6 / Atp6v1f / Bak1 / Clic1 / Cox5b / Cxcr3 / Cyba / Fxyd5 / Glrx / Lck / Slc9a3r1 / Sri / Wdr1
GO:0050701	interleukin-1 secretion	43	3	0.43	300	0.00889	0.00889	Ccl3 / Pycard / S100a13
GO:0090199	regulation of release of cytochrome c from mitochondria	43	3	0.43	301	0.00889	0.00889	Bak1 / Prelid1 / Pycard
GO:0051098	regulation of binding	354	9	3.52	302	0.00894	0.00894	Bak1 / Derl1 / Gzma / Hopx / Id2 / Lgals3 / S100a10 / Sri / Tmbim6
GO:0008154	actin polymerization or depolymerization	179	6	1.78	304	0.009	0.009	Pstpip1 / Pycard / Rac1 / Tmsb4x / Vasp / Wdr1
GO:0009617	response to bacterium	487	15	4.84	73	0.00913	0.0001	Ccl5 / Cd52 / Cd6 / Cyba / Gbp2 / Gzma / H2-K1 / Ly6a / Pglyrp1 / Pla2g16 / Plac8 / Psmb9 / Pycard / Spn / Vim
GO:0070234	positive regulation of T cell apoptotic process	15	2	0.15	308	0.00948	0.00948	Ccl5 / Prelid1
GO:0002093	auditory receptor cell morphogenesis	15	2	0.15	309	0.00948	0.00948	Rac1 / Slc9a3r1
GO:0044062	regulation of excretion	15	2	0.15	310	0.00948	0.00948	Gnai2 / Slc9a3r1
GO:0072676	lymphocyte migration	82	7	0.82	51	0.01059	1.7e-05	Ccl3 / Ccl4 / Ccl5 / Cxcr3 / Pycard / Spn / Tbx21
GO:0044403	symbiont process	315	10	3.13	145	0.01067	0.00121	Bak1 / Ccl4 / Ccl5 / Eif3f / Gbp2 / Isg20 / Lgals1 / Pglyrp1 / Vamp8 / Zbp1
GO:0043392	negative regulation of DNA binding	46	3	0.46	317	0.01071	0.01071	Gzma / Id2 / Sri
GO:0010524	positive regulation of calcium ion transport into cytosol	46	3	0.46	318	0.01071	0.01071	Bak1 / Cxcr3 / Sri
GO:2000649	regulation of sodium ion transmembrane transporter activity	46	3	0.46	319	0.01071	0.01071	Fxyd5 / Glrx / Slc9a3r1
GO:0046629	gamma-delta T cell activation	16	2	0.16	320	0.01076	0.01076	Jaml / Lck
GO:0140131	positive regulation of lymphocyte chemotaxis	16	2	0.16	321	0.01076	0.01076	Ccl4 / Ccl5
GO:0032688	negative regulation of interferon-beta production	16	2	0.16	322	0.01076	0.01076	Nmi / Pycard
GO:0002295	T-helper cell lineage commitment	16	2	0.16	323	0.01076	0.01076	Spn / Tbx21
GO:0002819	regulation of adaptive immune response	169	9	1.68	68	0.01104	4.8e-05	Cd48 / H2-K1 / H2-Q6 / H2-Q7 / H2-T22 / Irf7 / Pycard / Spn / Tbx21
GO:0042102	positive regulation of T cell proliferation	87	4	0.87	326	0.01105	0.01105	Ccl5 / Cd6 / Pycard / Spn
GO:0070098	chemokine-mediated signaling pathway	47	3	0.47	327	0.01136	0.01136	Ccl3 / Ccl4 / Ccl5
GO:0006952	defense response	1095	38	10.89	3	0.01159	4.9e-12	Actg1 / Ccl3 / Ccl4 / Ccl5 / Cd6 / Cd8a / Cotl1 / Ctla2a / Cxcr3 / Cxcr6 / Cyba / Ddt / Gbp2 / Gzmb / H2-K1 / H2-Q7 / Igtp / Irf7 / Isg20 / Lag3 / Lat / Lgals3 / Lsp1 / Mx1 / Nmi / Pglyrp1 / Plac8 / Prf1 / Pstpip1 / Pycard / Rtp4 / Spn / Tap1 / Trafd1 / Vamp8 / Vim / Zbp1 / Zyx
GO:0045824	negative regulation of innate immune response	48	3	0.48	329	0.01203	0.01203	Nmi / Tap1 / Trafd1
GO:0032930	positive regulation of superoxide anion generation	17	2	0.17	331	0.01212	0.01212	Cyba / Gnai2
GO:0071392	cellular response to estradiol stimulus	17	2	0.17	332	0.01212	0.01212	Glrx / H2afz
GO:0043373	CD4-positive, alpha-beta T cell lineage commitment	17	2	0.17	333	0.01212	0.01212	Spn / Tbx21
GO:0051209	release of sequestered calcium ion into cytosol	92	4	0.92	338	0.01336	0.01336	Cxcr3 / Cyba / Lck / Sri
GO:0046902	regulation of mitochondrial membrane permeability	50	3	0.5	339	0.01343	0.01343	Bak1 / Cnp / Slc25a5
GO:0045620	negative regulation of lymphocyte differentiation	50	3	0.5	340	0.01343	0.01343	Id2 / Pglyrp1 / Tbx21
GO:0032648	regulation of interferon-beta production	50	3	0.5	341	0.01343	0.01343	Irf7 / Nmi / Pycard
GO:0002710	negative regulation of T cell mediated immunity	18	2	0.18	343	0.01354	0.01354	Spn / Tbx21
GO:0010818	T cell chemotaxis	18	2	0.18	344	0.01354	0.01354	Ccl5 / Cxcr3
GO:0050708	regulation of protein secretion	380	9	3.78	345	0.01374	0.01374	Ccl3 / Ccl5 / Glrx / Pycard / Srgn / Sri / Tmbim6 / Ucp2 / Vamp8
GO:0043269	regulation of ion transport	505	16	5.02	67	0.01381	4.3e-05	Bak1 / Ccl4 / Ccl5 / Clic1 / Cxcr3 / Cyba / Fxyd5 / Glrx / Gnai2 / Lgals3 / Prelid1 / Slc9a3r1 / Sri / Tmbim6 / Vamp8 / Wdr1
GO:0032608	interferon-beta production	52	3	0.52	348	0.01493	0.01493	Irf7 / Nmi / Pycard
GO:0010592	positive regulation of lamellipodium assembly	19	2	0.19	350	0.01504	0.01504	Rac1 / Rac2
GO:0002363	alpha-beta T cell lineage commitment	19	2	0.19	351	0.01504	0.01504	Spn / Tbx21
GO:0034765	regulation of ion transmembrane transport	326	8	3.24	358	0.01629	0.01629	Clic1 / Cxcr3 / Cyba / Fxyd5 / Glrx / Slc9a3r1 / Sri / Wdr1
GO:1902305	regulation of sodium ion transmembrane transport	54	3	0.54	360	0.01652	0.01652	Fxyd5 / Glrx / Slc9a3r1
GO:0043369	CD4-positive or CD8-positive, alpha-beta T cell lineage commitment	20	2	0.2	361	0.0166	0.0166	Spn / Tbx21
GO:0002438	acute inflammatory response to antigenic stimulus	20	2	0.2	362	0.0166	0.0166	Cd6 / Spn
GO:0032970	regulation of actin filament-based process	329	8	3.27	366	0.01712	0.01712	Cnn2 / Pycard / Rac1 / S100a10 / Sri / Tmsb4x / Vasp / Wdr1
GO:1990868	response to chemokine	55	3	0.55	367	0.01735	0.01735	Ccl3 / Ccl4 / Ccl5
GO:1990869	cellular response to chemokine	55	3	0.55	368	0.01735	0.01735	Ccl3 / Ccl4 / Ccl5
GO:0048661	positive regulation of smooth muscle cell proliferation	100	4	0.99	371	0.01765	0.01765	Ccl5 / Cyba / Gnai2 / Id2
GO:0002763	positive regulation of myeloid leukocyte differentiation	56	3	0.56	374	0.0182	0.0182	Ccl3 / Ccl5 / Id2
GO:0042267	natural killer cell mediated cytotoxicity	56	3	0.56	375	0.0182	0.0182	Gzmb / Lag3 / Tap1
GO:0071677	positive regulation of mononuclear cell migration	21	2	0.21	376	0.01823	0.01823	Ccl5 / Lgals3
GO:0032928	regulation of superoxide anion generation	21	2	0.21	377	0.01823	0.01823	Cyba / Gnai2
GO:0043153	entrainment of circadian clock by photoperiod	21	2	0.21	378	0.01823	0.01823	Id2 / Ppp1ca
GO:0050901	leukocyte tethering or rolling	21	2	0.21	379	0.01823	0.01823	Selplg / Spn
GO:0030041	actin filament polymerization	153	5	1.52	382	0.0184	0.0184	Pstpip1 / Pycard / Rac1 / Tmsb4x / Vasp
GO:0097553	calcium ion transmembrane import into cytosol	102	4	1.01	384	0.01884	0.01884	Cxcr3 / Cyba / Lck / Sri
GO:0071222	cellular response to lipopolysaccharide	154	5	1.53	386	0.01887	0.01887	Ccl5 / Cd6 / Gbp2 / Pycard / Vim
GO:0002285	lymphocyte activation involved in immune response	155	5	1.54	389	0.01934	0.01934	Lgals1 / Lgals3 / Pglyrp1 / Spn / Tbx21
GO:0002791	regulation of peptide secretion	404	9	4.02	391	0.01967	0.01967	Ccl3 / Ccl5 / Glrx / Pycard / Srgn / Sri / Tmbim6 / Ucp2 / Vamp8
GO:0043496	regulation of protein homodimerization activity	22	2	0.22	393	0.01993	0.01993	Bak1 / Lgals3
GO:0009648	photoperiodism	22	2	0.22	394	0.01993	0.01993	Id2 / Ppp1ca
GO:0009649	entrainment of circadian clock	22	2	0.22	395	0.01993	0.01993	Id2 / Ppp1ca
GO:0090559	regulation of membrane permeability	58	3	0.58	399	0.01997	0.01997	Bak1 / Cnp / Slc25a5
GO:0002228	natural killer cell mediated immunity	58	3	0.58	400	0.01997	0.01997	Gzmb / Lag3 / Tap1
GO:0060402	calcium ion transport into cytosol	117	6	1.16	137	0.02047	0.0011	Bak1 / Cxcr3 / Cyba / Lck / Sri / Tmbim6
GO:0001913	T cell mediated cytotoxicity	54	6	0.54	48	0.02065	1.5e-05	Gzmb / H2-K1 / H2-Q6 / H2-Q7 / H2-T22 / Prf1
GO:0008064	regulation of actin polymerization or depolymerization	158	5	1.57	402	0.02082	0.02082	Pycard / Rac1 / Tmsb4x / Vasp / Wdr1
GO:1903530	regulation of secretion by cell	621	12	6.18	405	0.02112	0.02112	Ccl3 / Ccl5 / Glrx / Gnai2 / Lgals3 / Pycard / Rac2 / Srgn / Sri / Tmbim6 / Ucp2 / Vamp8
GO:0051707	response to other organism	696	25	6.92	10	0.02124	2.1e-08	Bak1 / Ccl5 / Cd52 / Cd6 / Cd8a / Cotl1 / Cyba / Gbp2 / Gzma / H2-K1 / Ifi27l2a / Irf7 / Isg20 / Ly6a / Mx1 / Pglyrp1 / Pla2g16 / Plac8 / Prf1 / Psmb9 / Pycard / Rtp4 / Spn / Vim / Zbp1
GO:0008630	intrinsic apoptotic signaling pathway in response to DNA damage	106	4	1.05	406	0.02137	0.02137	Bak1 / Crip1 / Pycard / Shisa5
GO:0051894	positive regulation of focal adhesion assembly	23	2	0.23	407	0.02168	0.02168	Rac1 / S100a10
GO:0032703	negative regulation of interleukin-2 production	23	2	0.23	408	0.02168	0.02168	Lag3 / Tbx21
GO:0045061	thymic T cell selection	23	2	0.23	409	0.02168	0.02168	Cd3d / Spn
GO:0002532	production of molecular mediator involved in inflammatory response	60	3	0.6	414	0.02183	0.02183	Cd6 / Pycard / Vamp8
GO:0030832	regulation of actin filament length	160	5	1.59	416	0.02185	0.02185	Pycard / Rac1 / Tmsb4x / Vasp / Wdr1
GO:0043207	response to external biotic stimulus	697	25	6.93	11	0.02208	2.1e-08	Bak1 / Ccl5 / Cd52 / Cd6 / Cd8a / Cotl1 / Cyba / Gbp2 / Gzma / H2-K1 / Ifi27l2a / Irf7 / Isg20 / Ly6a / Mx1 / Pglyrp1 / Pla2g16 / Plac8 / Prf1 / Psmb9 / Pycard / Rtp4 / Spn / Vim / Zbp1
GO:0045088	regulation of innate immune response	233	8	2.32	180	0.0223	0.0023	Cyba / Irf7 / Lag3 / Nmi / Pycard / Tap1 / Trafd1 / Zbp1
GO:0050868	negative regulation of T cell activation	108	4	1.07	419	0.02271	0.02271	Lag3 / Lgals3 / Spn / Tbx21
GO:2001244	positive regulation of intrinsic apoptotic signaling pathway	61	3	0.61	421	0.0228	0.0228	Lck / Slc9a3r1 / Ubb
GO:0071219	cellular response to molecule of bacterial origin	162	5	1.61	423	0.02291	0.02291	Ccl5 / Cd6 / Gbp2 / Pycard / Vim
GO:0032480	negative regulation of type I interferon production	24	2	0.24	425	0.0235	0.0235	Nmi / Pycard
GO:0061756	leukocyte adhesion to vascular endothelial cell	24	2	0.24	426	0.0235	0.0235	Selplg / Spn
GO:0009060	aerobic respiration	62	3	0.62	428	0.02379	0.02379	Cox5b / Mdh2 / Uqcrc1
GO:0051046	regulation of secretion	658	14	6.55	260	0.0245	0.00593	Ccl3 / Ccl5 / Cyba / Glrx / Gnai2 / Lgals3 / Pycard / Rac2 / Slc9a3r1 / Srgn / Sri / Tmbim6 / Ucp2 / Vamp8
GO:0110053	regulation of actin filament organization	225	6	2.24	430	0.02502	0.02502	Pycard / Rac1 / S100a10 / Tmsb4x / Vasp / Wdr1
GO:0021772	olfactory bulb development	25	2	0.25	431	0.02538	0.02538	Id2 / Rac1
GO:0021884	forebrain neuron development	25	2	0.25	432	0.02538	0.02538	Rac1 / Ubb
GO:0032469	endoplasmic reticulum calcium ion homeostasis	25	2	0.25	433	0.02538	0.02538	Bak1 / Tmbim6
GO:0045777	positive regulation of blood pressure	25	2	0.25	434	0.02538	0.02538	Cyba / Id2
GO:0045589	regulation of regulatory T cell differentiation	25	2	0.25	435	0.02538	0.02538	Ctla2a / Lck
GO:0002360	T cell lineage commitment	25	2	0.25	436	0.02538	0.02538	Spn / Tbx21
GO:0098801	regulation of renal system process	25	2	0.25	437	0.02538	0.02538	Cyba / Gnai2
GO:0003014	renal system process	64	3	0.64	439	0.02583	0.02583	Cyba / Gnai2 / Slc9a3r1
GO:0001738	morphogenesis of a polarized epithelium	65	3	0.65	441	0.02689	0.02689	Rac1 / Slc9a3r1 / Wdr1
GO:0051279	regulation of release of sequestered calcium ion into cytosol	65	3	0.65	442	0.02689	0.02689	Cxcr3 / Cyba / Sri
GO:0050718	positive regulation of interleukin-1 beta secretion	26	2	0.26	444	0.02732	0.02732	Ccl3 / Pycard
GO:1902745	positive regulation of lamellipodium organization	26	2	0.26	445	0.02732	0.02732	Rac1 / Rac2
GO:0002230	positive regulation of defense response to virus by host	26	2	0.26	446	0.02732	0.02732	Ccl5 / Pycard
GO:0050728	negative regulation of inflammatory response	115	4	1.14	449	0.02779	0.02779	Ctla2a / Pglyrp1 / Pycard / Spn
GO:0060401	cytosolic calcium ion transport	129	6	1.28	168	0.02892	0.00182	Bak1 / Cxcr3 / Cyba / Lck / Sri / Tmbim6
GO:2000403	positive regulation of lymphocyte migration	34	4	0.34	100	0.029	0.00035	Ccl4 / Ccl5 / Pycard / Spn
GO:0048709	oligodendrocyte differentiation	67	3	0.67	453	0.02908	0.02908	Cnp / Id2 / Wdr1
GO:0050716	positive regulation of interleukin-1 secretion	27	2	0.27	455	0.02932	0.02932	Ccl3 / Pycard
GO:0010758	regulation of macrophage chemotaxis	27	2	0.27	456	0.02932	0.02932	Ccl5 / Ddt
GO:0033006	regulation of mast cell activation involved in immune response	27	2	0.27	457	0.02932	0.02932	Rac2 / Vamp8
GO:0090200	positive regulation of release of cytochrome c from mitochondria	27	2	0.27	458	0.02932	0.02932	Bak1 / Pycard
GO:0021988	olfactory lobe development	27	2	0.27	459	0.02932	0.02932	Id2 / Rac1
GO:0042554	superoxide anion generation	27	2	0.27	460	0.02932	0.02932	Cyba / Gnai2
GO:0045672	positive regulation of osteoclast differentiation	27	2	0.27	461	0.02932	0.02932	Ccl3 / Ccl5
GO:0043304	regulation of mast cell degranulation	27	2	0.27	462	0.02932	0.02932	Rac2 / Vamp8
GO:0042036	negative regulation of cytokine biosynthetic process	27	2	0.27	463	0.02932	0.02932	Lag3 / Nmi
GO:0032647	regulation of interferon-alpha production	27	2	0.27	464	0.02932	0.02932	Irf7 / Nmi
GO:1902905	positive regulation of supramolecular fiber organization	174	5	1.73	465	0.02997	0.02997	Pycard / Rac1 / S100a10 / Vasp / Wdr1
GO:1903531	negative regulation of secretion by cell	174	5	1.73	466	0.02997	0.02997	Gnai2 / Srgn / Tmbim6 / Ucp2 / Vamp8
GO:1903038	negative regulation of leukocyte cell-cell adhesion	118	4	1.17	467	0.03016	0.03016	Lag3 / Lgals3 / Spn / Tbx21
GO:0050688	regulation of defense response to virus	68	3	0.68	468	0.0302	0.0302	Ccl5 / Pycard / Spn
GO:0044419	interspecies interaction between organisms	330	11	3.28	108	0.03036	0.00046	Bak1 / Ccl4 / Ccl5 / Eif3f / Gbp2 / Isg20 / Lgals1 / Pglyrp1 / Prf1 / Vamp8 / Zbp1
GO:0016032	viral process	248	8	2.47	210	0.03053	0.00338	Bak1 / Ccl4 / Ccl5 / Eif3f / Isg20 / Lgals1 / Vamp8 / Zbp1
GO:0098662	inorganic cation transmembrane transport	437	9	4.35	469	0.03059	0.03059	Atp6v1f / Cox5b / Cxcr3 / Cyba / Fxyd5 / Glrx / Lck / Slc9a3r1 / Sri
GO:0018345	protein palmitoylation	28	2	0.28	471	0.03137	0.03137	Abhd17a / Zdhhc18
GO:0045066	regulatory T cell differentiation	28	2	0.28	472	0.03137	0.03137	Ctla2a / Lck
GO:0032607	interferon-alpha production	28	2	0.28	473	0.03137	0.03137	Irf7 / Nmi
GO:0051047	positive regulation of secretion	370	8	3.68	476	0.03165	0.03165	Ccl3 / Cyba / Glrx / Gnai2 / Lgals3 / Pycard / Sri / Vamp8
GO:0051258	protein polymerization	239	6	2.38	477	0.03229	0.03229	Mx1 / Pstpip1 / Pycard / Rac1 / Tmsb4x / Vasp
GO:0010522	regulation of calcium ion transport into cytosol	82	5	0.82	149	0.03261	0.00134	Bak1 / Cxcr3 / Cyba / Sri / Tmbim6
GO:0071356	cellular response to tumor necrosis factor	121	4	1.2	479	0.03265	0.03265	Ccl3 / Ccl4 / Ccl5 / Pycard
GO:0050671	positive regulation of lymphocyte proliferation	121	4	1.2	480	0.03265	0.03265	Ccl5 / Cd6 / Pycard / Spn
GO:0045321	leukocyte activation	732	25	7.28	15	0.03294	5.6e-08	Bak1 / Ccl5 / Cd3d / Cd48 / Cd6 / Cd8a / Ctla2a / Icos / Id2 / Jaml / Lag3 / Lat / Lck / Lgals1 / Lgals3 / Pglyrp1 / Prelid1 / Prf1 / Psmb10 / Pycard / Rac2 / Selplg / Spn / Tbx21 / Vamp8
GO:0009409	response to cold	29	2	0.29	483	0.03348	0.03348	Plac8 / Ucp2
GO:1903393	positive regulation of adherens junction organization	29	2	0.29	484	0.03348	0.03348	Rac1 / S100a10
GO:1901890	positive regulation of cell junction assembly	29	2	0.29	485	0.03348	0.03348	Rac1 / S100a10
GO:0034620	cellular response to unfolded protein	71	3	0.71	488	0.03372	0.03372	Bak1 / Derl1 / Tmbim6
GO:1902600	proton transmembrane transport	71	3	0.71	489	0.03372	0.03372	Atp6v1f / Cox5b / Slc9a3r1
GO:0072332	intrinsic apoptotic signaling pathway by p53 class mediator	71	3	0.71	490	0.03372	0.03372	Pycard / Shisa5 / Ubb
GO:0043270	positive regulation of ion transport	228	10	2.27	72	0.03399	9.4e-05	Bak1 / Ccl4 / Ccl5 / Cxcr3 / Glrx / Lgals3 / Prelid1 / Slc9a3r1 / Sri / Vamp8
GO:0032946	positive regulation of mononuclear cell proliferation	123	4	1.22	492	0.03437	0.03437	Ccl5 / Cd6 / Pycard / Spn
GO:0042110	T cell activation	423	19	4.21	12	0.0347	4e-08	Ccl5 / Cd3d / Cd48 / Cd6 / Cd8a / Ctla2a / Icos / Jaml / Lag3 / Lat / Lck / Lgals1 / Lgals3 / Prelid1 / Psmb10 / Pycard / Rac2 / Spn / Tbx21
GO:1904062	regulation of cation transmembrane transport	244	6	2.43	493	0.03519	0.03519	Cxcr3 / Cyba / Fxyd5 / Glrx / Slc9a3r1 / Sri
GO:0045197	establishment or maintenance of epithelial cell apical/basal polarity	30	2	0.3	497	0.03564	0.03564	Slc9a3r1 / Wdr1
GO:0090322	regulation of superoxide metabolic process	30	2	0.3	498	0.03564	0.03564	Cyba / Gnai2
GO:0001779	natural killer cell differentiation	30	2	0.3	499	0.03564	0.03564	Id2 / Pglyrp1
GO:0002698	negative regulation of immune effector process	116	6	1.15	136	0.03577	0.00106	Lgals3 / Pglyrp1 / Spn / Tap1 / Tbx21 / Tmbim6
GO:0071216	cellular response to biotic stimulus	183	5	1.82	503	0.03607	0.03607	Ccl5 / Cd6 / Gbp2 / Pycard / Vim
GO:0034767	positive regulation of ion transmembrane transport	126	4	1.25	504	0.03705	0.03705	Cxcr3 / Glrx / Slc9a3r1 / Sri
GO:0032479	regulation of type I interferon production	74	3	0.74	505	0.03744	0.03744	Irf7 / Nmi / Pycard
GO:0002701	negative regulation of production of molecular mediator of immune response	31	2	0.31	506	0.03785	0.03785	Tbx21 / Tmbim6
GO:0050706	regulation of interleukin-1 beta secretion	31	2	0.31	507	0.03785	0.03785	Ccl3 / Pycard
GO:1905521	regulation of macrophage migration	31	2	0.31	508	0.03785	0.03785	Ccl5 / Ddt
GO:0010591	regulation of lamellipodium assembly	31	2	0.31	509	0.03785	0.03785	Rac1 / Rac2
GO:0070665	positive regulation of leukocyte proliferation	127	4	1.26	512	0.03797	0.03797	Ccl5 / Cd6 / Pycard / Spn
GO:0006897	endocytosis	529	10	5.26	513	0.03851	0.03851	Actg1 / Clta / Cnn2 / Cyba / Dbnl / Lgals3 / Pstpip1 / Pycard / Rac1 / Vamp8
GO:0002831	regulation of response to biotic stimulus	128	4	1.27	515	0.0389	0.0389	Ccl5 / Cyba / Pycard / Spn
GO:0051590	positive regulation of neurotransmitter transport	32	2	0.32	518	0.04012	0.04012	Lgals3 / Vamp8
GO:0071260	cellular response to mechanical stimulus	32	2	0.32	519	0.04012	0.04012	Cnn2 / Rac1
GO:0009620	response to fungus	32	2	0.32	520	0.04012	0.04012	Bak1 / Cotl1
GO:0009636	response to toxic substance	252	6	2.51	521	0.04017	0.04017	Bak1 / Ccl4 / Ccl5 / Cnp / Glrx / Lck
GO:0098660	inorganic ion transmembrane transport	462	9	4.6	522	0.04129	0.04129	Atp6v1f / Cox5b / Cxcr3 / Cyba / Fxyd5 / Glrx / Lck / Slc9a3r1 / Sri
GO:0050764	regulation of phagocytosis	77	3	0.77	523	0.04136	0.04136	Cnn2 / Cyba / Pycard
GO:0019221	cytokine-mediated signaling pathway	269	8	2.68	253	0.04188	0.00549	Ccl3 / Ccl4 / Ccl5 / Csnk2b / Irf7 / Nmi / Pycard / Zbp1
GO:1900026	positive regulation of substrate adhesion-dependent cell spreading	33	2	0.33	526	0.04243	0.04243	Rac1 / S100a10
GO:1900015	regulation of cytokine production involved in inflammatory response	33	2	0.33	527	0.04243	0.04243	Cd6 / Pycard
GO:0032731	positive regulation of interleukin-1 beta production	33	2	0.33	528	0.04243	0.04243	Ccl3 / Pycard
GO:0051281	positive regulation of release of sequestered calcium ion into cytosol	33	2	0.33	529	0.04243	0.04243	Cxcr3 / Sri
GO:0002028	regulation of sodium ion transport	78	3	0.78	530	0.04271	0.04271	Fxyd5 / Glrx / Slc9a3r1
GO:0050796	regulation of insulin secretion	132	4	1.31	531	0.04277	0.04277	Ccl5 / Glrx / Sri / Ucp2
GO:0051048	negative regulation of secretion	192	5	1.91	532	0.04289	0.04289	Gnai2 / Srgn / Tmbim6 / Ucp2 / Vamp8
GO:0071396	cellular response to lipid	394	8	3.92	534	0.04325	0.04325	Ccl5 / Cd6 / Gbp2 / Glrx / Gng2 / H2afz / Pycard / Vim
GO:0032602	chemokine production	79	3	0.79	536	0.04408	0.04408	Ccl5 / Cxcr3 / Pycard
GO:0051495	positive regulation of cytoskeleton organization	194	5	1.93	538	0.0445	0.0445	Pycard / Rac1 / S100a10 / Vasp / Wdr1
GO:0043547	positive regulation of GTPase activity	195	5	1.94	543	0.04532	0.04532	Ccl3 / Ccl4 / Ccl5 / Rhog / S100a10
GO:0034762	regulation of transmembrane transport	398	8	3.96	544	0.04543	0.04543	Clic1 / Cxcr3 / Cyba / Fxyd5 / Glrx / Slc9a3r1 / Sri / Wdr1
GO:0051051	negative regulation of transport	415	10	4.13	297	0.04579	0.00856	Cnn2 / Gnai2 / Lgals3 / Slc25a5 / Slc9a3r1 / Srgn / Sri / Tmbim6 / Ucp2 / Vamp8
GO:0045580	regulation of T cell differentiation	135	4	1.34	545	0.0458	0.0458	Ctla2a / Lck / Prelid1 / Tbx21
GO:0070887	cellular response to chemical stimulus	2102	42	20.91	35	0.04639	4.3e-06	Actg1 / Bak1 / Ccl3 / Ccl4 / Ccl5 / Cd6 / Crip1 / Csnk2b / Cxcr3 / Cxcr6 / Cyba / Dapk2 / Ddt / Derl1 / Gbp2 / Glrx / Gnai2 / Gng2 / H2-Q7 / H2afz / Id2 / Igtp / Irf7 / Jaml / Lgals3 / Nmi / Pmepa1 / Pycard / Rac1 / Rac2 / Rhog / S100a10 / Slc25a5 / Sra1 / Sri / Tbx21 / Tmbim6 / Ucp2 / Vamp8 / Vim / Zbp1 / Zyx
GO:0035725	sodium ion transmembrane transport	81	3	0.81	548	0.04689	0.04689	Fxyd5 / Glrx / Slc9a3r1
GO:0002696	positive regulation of leukocyte activation	292	9	2.9	193	0.0469	0.00259	Ccl5 / Cd6 / Icos / Lck / Lgals1 / Pycard / Spn / Tbx21 / Vamp8
GO:0032355	response to estradiol	35	2	0.35	549	0.04721	0.04721	Glrx / H2afz
GO:0048713	regulation of oligodendrocyte differentiation	35	2	0.35	550	0.04721	0.04721	Id2 / Wdr1
GO:0001562	response to protozoan	35	2	0.35	551	0.04721	0.04721	Gbp2 / Spn
GO:0042221	response to chemical	2805	49	27.9	56	0.0477	2.2e-05	Actg1 / Bak1 / Ccl3 / Ccl4 / Ccl5 / Cd6 / Cnp / Crip1 / Csnk2b / Cxcr3 / Cxcr6 / Cyba / Dapk2 / Ddt / Derl1 / Gbp2 / Glrx / Gnai2 / Gng2 / H2-Q7 / H2afz / Id2 / Igtp / Irf7 / Jaml / Lck / Lgals3 / Lsp1 / Nmi / Pmepa1 / Ppp1ca / Pycard / Rac1 / Rac2 / Rhog / Rtp4 / S100a10 / Serpina3g / Slc25a5 / Sra1 / Sri / Tbx21 / Tmbim6 / Ucp2 / Vamp8 / Vasp / Vim / Zbp1 / Zyx
GO:0002551	mast cell chemotaxis	13	3	0.13	91	0.04812	0.00026	Ccl5 / Rac1 / Rac2
GO:0010990	regulation of SMAD protein complex assembly	5	1	0.05	552	0.04876	0.04876	Pmepa1
GO:0033211	adiponectin-activated signaling pathway	5	1	0.05	553	0.04876	0.04876	Csnk2b
GO:0031584	activation of phospholipase D activity	5	1	0.05	554	0.04876	0.04876	Ccl5
GO:2000110	negative regulation of macrophage apoptotic process	5	1	0.05	555	0.04876	0.04876	Ccl5
GO:0032415	regulation of sodium:proton antiporter activity	5	1	0.05	556	0.04876	0.04876	Slc9a3r1
GO:0002580	regulation of antigen processing and presentation of peptide or polysaccharide antigen via MHC class II	5	1	0.05	557	0.04876	0.04876	Pycard
GO:0051025	negative regulation of immunoglobulin secretion	5	1	0.05	558	0.04876	0.04876	Tmbim6
GO:0055118	negative regulation of cardiac muscle contraction	5	1	0.05	559	0.04876	0.04876	Sri
GO:0042270	protection from natural killer cell mediated cytotoxicity	5	1	0.05	560	0.04876	0.04876	Tap1
GO:0002016	regulation of blood volume by renin-angiotensin	5	1	0.05	561	0.04876	0.04876	Cyba
GO:0048597	post-embryonic camera-type eye morphogenesis	5	1	0.05	562	0.04876	0.04876	Bak1
GO:0060054	positive regulation of epithelial cell proliferation involved in wound healing	5	1	0.05	563	0.04876	0.04876	Jaml
GO:0048050	post-embryonic eye morphogenesis	5	1	0.05	564	0.04876	0.04876	Bak1
GO:0035815	positive regulation of renal sodium excretion	5	1	0.05	565	0.04876	0.04876	Gnai2
GO:2000586	regulation of platelet-derived growth factor receptor-beta signaling pathway	5	1	0.05	566	0.04876	0.04876	Glrx
GO:1902816	regulation of protein localization to microtubule	5	1	0.05	567	0.04876	0.04876	Abhd17a
GO:1902817	negative regulation of protein localization to microtubule	5	1	0.05	568	0.04876	0.04876	Abhd17a
GO:0045085	negative regulation of interleukin-2 biosynthetic process	5	1	0.05	569	0.04876	0.04876	Lag3
GO:0002339	B cell selection	5	1	0.05	570	0.04876	0.04876	Bak1
GO:0035090	maintenance of apical/basal cell polarity	5	1	0.05	571	0.04876	0.04876	Wdr1
GO:0010046	response to mycotoxin	5	1	0.05	572	0.04876	0.04876	Bak1
GO:0009052	pentose-phosphate shunt, non-oxidative branch	5	1	0.05	573	0.04876	0.04876	Tkt
GO:0010649	regulation of cell communication by electrical coupling	5	1	0.05	574	0.04876	0.04876	Sri
GO:0060355	positive regulation of cell adhesion molecule production	5	1	0.05	575	0.04876	0.04876	Glrx
GO:0000738	DNA catabolic process, exonucleolytic	5	1	0.05	576	0.04876	0.04876	Isg20
GO:0060315	negative regulation of ryanodine-sensitive calcium-release channel activity	5	1	0.05	577	0.04876	0.04876	Sri
GO:1990441	negative regulation of transcription from RNA polymerase II promoter in response to endoplasmic reticulum stress	5	1	0.05	578	0.04876	0.04876	Tmbim6
GO:0032687	negative regulation of interferon-alpha production	5	1	0.05	579	0.04876	0.04876	Nmi
GO:2001181	positive regulation of interleukin-10 secretion	5	1	0.05	580	0.04876	0.04876	Pycard
GO:0036135	Schwann cell migration	5	1	0.05	581	0.04876	0.04876	Vim
GO:0002291	T cell activation via T cell receptor contact with antigen bound to MHC molecule on antigen presenting cell	5	1	0.05	582	0.04876	0.04876	Lgals3
GO:0045354	regulation of interferon-alpha biosynthetic process	5	1	0.05	583	0.04876	0.04876	Nmi
GO:0050904	diapedesis	5	1	0.05	584	0.04876	0.04876	Ccl5
GO:1903297	regulation of hypoxia-induced intrinsic apoptotic signaling pathway	5	1	0.05	585	0.04876	0.04876	Tmbim6
GO:1903298	negative regulation of hypoxia-induced intrinsic apoptotic signaling pathway	5	1	0.05	586	0.04876	0.04876	Tmbim6
GO:0045349	interferon-alpha biosynthetic process	5	1	0.05	587	0.04876	0.04876	Nmi
GO:0051715	cytolysis in other organism	5	1	0.05	588	0.04876	0.04876	Pglyrp1
GO:0060158	phospholipase C-activating dopamine receptor signaling pathway	5	1	0.05	589	0.04876	0.04876	Slc9a3r1
GO:0034612	response to tumor necrosis factor	138	4	1.37	590	0.04895	0.04895	Ccl3 / Ccl4 / Ccl5 / Pycard
GO:0010959	regulation of metal ion transport	316	12	3.14	70	0.04899	7.5e-05	Bak1 / Ccl4 / Ccl5 / Cxcr3 / Cyba / Fxyd5 / Glrx / Gnai2 / Lgals3 / Slc9a3r1 / Sri / Tmbim6
GO:0045214	sarcomere organization	36	2	0.36	592	0.04967	0.04967	Actg1 / Wdr1
GO:0002534	cytokine production involved in inflammatory response	36	2	0.36	593	0.04967	0.04967	Cd6 / Pycard
GO:0050704	regulation of interleukin-1 secretion	36	2	0.36	594	0.04967	0.04967	Ccl3 / Pycard
GO:0050848	regulation of calcium-mediated signaling	83	3	0.83	596	0.04979	0.04979	Ccl4 / Cd8a / Sri
GO:0045333	cellular respiration	139	4	1.38	597	0.05003	0.05003	Cox5b / Mdh2 / Prelid1 / Uqcrc1
GO:0050870	positive regulation of T cell activation	167	7	1.66	151	0.05033	0.0014	Ccl5 / Cd6 / Icos / Lck / Lgals1 / Pycard / Spn
GO:0043087	regulation of GTPase activity	267	6	2.66	599	0.05067	0.05067	Ccl3 / Ccl4 / Ccl5 / Pycard / Rhog / S100a10
GO:0050900	leukocyte migration	284	15	2.82	18	0.05072	1.5e-07	Ccl3 / Ccl4 / Ccl5 / Cxcr3 / Dapk2 / Ddt / Jaml / Lgals3 / Pycard / Rac1 / Rac2 / Selplg / Spn / Tbx21 / Wdr1
GO:0030833	regulation of actin filament polymerization	140	4	1.39	600	0.05112	0.05112	Pycard / Rac1 / Tmsb4x / Vasp
GO:0030838	positive regulation of actin filament polymerization	84	3	0.84	601	0.05127	0.05127	Pycard / Rac1 / Vasp
GO:0050702	interleukin-1 beta secretion	37	2	0.37	602	0.05217	0.05217	Ccl3 / Pycard
GO:0035088	establishment or maintenance of apical/basal cell polarity	37	2	0.37	603	0.05217	0.05217	Slc9a3r1 / Wdr1
GO:0061245	establishment or maintenance of bipolar cell polarity	37	2	0.37	604	0.05217	0.05217	Slc9a3r1 / Wdr1
GO:0045639	positive regulation of myeloid cell differentiation	85	3	0.85	606	0.05277	0.05277	Ccl3 / Ccl5 / Id2
GO:0046883	regulation of hormone secretion	204	5	2.03	608	0.05311	0.05311	Ccl5 / Glrx / Sri / Ucp2 / Vamp8
GO:0098655	cation transmembrane transport	486	9	4.83	609	0.05373	0.05373	Atp6v1f / Cox5b / Cxcr3 / Cyba / Fxyd5 / Glrx / Lck / Slc9a3r1 / Sri
GO:2001234	negative regulation of apoptotic signaling pathway	205	5	2.04	610	0.05402	0.05402	Gnai2 / Lgals3 / Prelid1 / Slc25a5 / Tmbim6
GO:0002286	T cell activation involved in immune response	86	3	0.86	611	0.0543	0.0543	Lgals3 / Spn / Tbx21
GO:0050856	regulation of T cell receptor signaling pathway	38	2	0.38	613	0.05472	0.05472	Lck / Lgals3
GO:0050691	regulation of defense response to virus by host	38	2	0.38	614	0.05472	0.05472	Ccl5 / Pycard
GO:0032732	positive regulation of interleukin-1 production	38	2	0.38	615	0.05472	0.05472	Ccl3 / Pycard
GO:0048247	lymphocyte chemotaxis	45	4	0.45	134	0.05595	0.00102	Ccl3 / Ccl4 / Ccl5 / Cxcr3
GO:0009607	response to biotic stimulus	728	25	7.24	14	0.05691	5e-08	Bak1 / Ccl5 / Cd52 / Cd6 / Cd8a / Cotl1 / Cyba / Gbp2 / Gzma / H2-K1 / Ifi27l2a / Irf7 / Isg20 / Ly6a / Mx1 / Pglyrp1 / Pla2g16 / Plac8 / Prf1 / Psmb9 / Pycard / Rtp4 / Spn / Vim / Zbp1
GO:0002823	negative regulation of adaptive immune response based on somatic recombination of immune receptors built from immunoglobulin superfamily domains	39	2	0.39	618	0.05731	0.05731	Spn / Tbx21
GO:0033003	regulation of mast cell activation	39	2	0.39	619	0.05731	0.05731	Rac2 / Vamp8
GO:0050867	positive regulation of cell activation	306	9	3.04	214	0.05737	0.00353	Ccl5 / Cd6 / Icos / Lck / Lgals1 / Pycard / Spn / Tbx21 / Vamp8
GO:0002526	acute inflammatory response	88	3	0.88	622	0.05741	0.05741	Ccl5 / Cd6 / Spn
GO:0097531	mast cell migration	14	3	0.14	97	0.05747	0.00032	Ccl5 / Rac1 / Rac2
GO:0015980	energy derivation by oxidation of organic compounds	209	5	2.08	623	0.05776	0.05776	Cox5b / Mdh2 / Ppp1ca / Prelid1 / Uqcrc1
GO:0048660	regulation of smooth muscle cell proliferation	146	4	1.45	624	0.05793	0.05793	Ccl5 / Cyba / Gnai2 / Id2
GO:0086064	cell communication by electrical coupling involved in cardiac conduction	6	1	0.06	625	0.05823	0.05823	Sri
GO:2000416	regulation of eosinophil migration	6	1	0.06	626	0.05823	0.05823	Dapk2
GO:0086023	adenylate cyclase-activating adrenergic receptor signaling pathway involved in heart process	6	1	0.06	627	0.05823	0.05823	Gnai2
GO:0010459	negative regulation of heart rate	6	1	0.06	628	0.05823	0.05823	Sri
GO:0008635	activation of cysteine-type endopeptidase activity involved in apoptotic process by cytochrome c	6	1	0.06	629	0.05823	0.05823	Bak1
GO:0014062	regulation of serotonin secretion	6	1	0.06	630	0.05823	0.05823	Lgals3
GO:0046645	positive regulation of gamma-delta T cell activation	6	1	0.06	631	0.05823	0.05823	Lck
GO:1902262	apoptotic process involved in blood vessel morphogenesis	6	1	0.06	632	0.05823	0.05823	Bak1
GO:0006108	malate metabolic process	6	1	0.06	633	0.05823	0.05823	Mdh2
GO:0010760	negative regulation of macrophage chemotaxis	6	1	0.06	634	0.05823	0.05823	Ddt
GO:0033634	positive regulation of cell-cell adhesion mediated by integrin	6	1	0.06	635	0.05823	0.05823	Ccl5
GO:1904177	regulation of adipose tissue development	6	1	0.06	636	0.05823	0.05823	Pla2g16
GO:0045588	positive regulation of gamma-delta T cell differentiation	6	1	0.06	637	0.05823	0.05823	Lck
GO:0030643	cellular phosphate ion homeostasis	6	1	0.06	638	0.05823	0.05823	Slc9a3r1
GO:0021979	hypothalamus cell differentiation	6	1	0.06	639	0.05823	0.05823	Ubb
GO:0072501	cellular divalent inorganic anion homeostasis	6	1	0.06	640	0.05823	0.05823	Slc9a3r1
GO:0072502	cellular trivalent inorganic anion homeostasis	6	1	0.06	641	0.05823	0.05823	Slc9a3r1
GO:0043416	regulation of skeletal muscle tissue regeneration	6	1	0.06	642	0.05823	0.05823	Hopx
GO:0060353	regulation of cell adhesion molecule production	6	1	0.06	643	0.05823	0.05823	Glrx
GO:0045919	positive regulation of cytolysis	6	1	0.06	644	0.05823	0.05823	Pglyrp1
GO:0070231	T cell apoptotic process	55	4	0.55	178	0.05859	0.00216	Bak1 / Ccl5 / Lgals3 / Prelid1
GO:0030038	contractile actin filament bundle assembly	89	3	0.89	645	0.05899	0.05899	Rac1 / S100a10 / Zyx
GO:0043149	stress fiber assembly	89	3	0.89	646	0.05899	0.05899	Rac1 / S100a10 / Zyx
GO:0002709	regulation of T cell mediated immunity	72	6	0.72	71	0.05982	7.9e-05	H2-K1 / H2-Q6 / H2-Q7 / H2-T22 / Spn / Tbx21
GO:0021879	forebrain neuron differentiation	40	2	0.4	649	0.05995	0.05995	Rac1 / Ubb
GO:1902743	regulation of lamellipodium organization	40	2	0.4	650	0.05995	0.05995	Rac1 / Rac2
GO:0043300	regulation of leukocyte degranulation	40	2	0.4	651	0.05995	0.05995	Rac2 / Vamp8
GO:0051100	negative regulation of binding	148	4	1.47	653	0.0603	0.0603	Gzma / Id2 / Sri / Tmbim6
GO:0035967	cellular response to topologically incorrect protein	90	3	0.9	654	0.0606	0.0606	Bak1 / Derl1 / Tmbim6
GO:0035458	cellular response to interferon-beta	41	2	0.41	657	0.06262	0.06262	Gbp2 / Igtp
GO:1903039	positive regulation of leukocyte cell-cell adhesion	178	7	1.77	175	0.06281	0.00202	Ccl5 / Cd6 / Icos / Lck / Lgals1 / Pycard / Spn
GO:1902106	negative regulation of leukocyte differentiation	92	3	0.92	658	0.06387	0.06387	Id2 / Pglyrp1 / Tbx21
GO:0042035	regulation of cytokine biosynthetic process	92	3	0.92	659	0.06387	0.06387	Lag3 / Nmi / Spn
GO:1902107	positive regulation of leukocyte differentiation	151	4	1.5	660	0.06396	0.06396	Ccl3 / Ccl5 / Id2 / Lck
GO:0048659	smooth muscle cell proliferation	151	4	1.5	661	0.06396	0.06396	Ccl5 / Cyba / Gnai2 / Id2
GO:0042330	taxis	442	15	4.4	62	0.06438	3.4e-05	Ccl3 / Ccl4 / Ccl5 / Cxcr3 / Cxcr6 / Dapk2 / Ddt / Id2 / Jaml / Lgals3 / Lsp1 / Rac1 / Rac2 / Rhog / Vasp
GO:0043393	regulation of protein binding	216	5	2.15	663	0.06465	0.06465	Bak1 / Derl1 / Hopx / Lgals3 / Tmbim6
GO:0002820	negative regulation of adaptive immune response	42	2	0.42	664	0.06533	0.06533	Spn / Tbx21
GO:0050850	positive regulation of calcium-mediated signaling	42	2	0.42	665	0.06533	0.06533	Ccl4 / Cd8a
GO:0042771	intrinsic apoptotic signaling pathway in response to DNA damage by p53 class mediator	42	2	0.42	666	0.06533	0.06533	Pycard / Shisa5
GO:0046148	pigment biosynthetic process	42	2	0.42	667	0.06533	0.06533	Ddt / Tmem14c
GO:0007006	mitochondrial membrane organization	93	3	0.93	670	0.06554	0.06554	Bak1 / Cnp / Slc25a5
GO:0002474	antigen processing and presentation of peptide antigen via MHC class I	20	3	0.2	131	0.06674	0.00097	H2-K1 / H2-Q7 / Tap1
GO:0007144	female meiosis I	7	1	0.07	673	0.0676	0.0676	Ubb
GO:0021891	olfactory bulb interneuron development	7	1	0.07	674	0.0676	0.0676	Rac1
GO:0007213	G protein-coupled acetylcholine receptor signaling pathway	7	1	0.07	675	0.0676	0.0676	Gnai2
GO:0010454	negative regulation of cell fate commitment	7	1	0.07	676	0.0676	0.0676	Tbx21
GO:1901029	negative regulation of mitochondrial outer membrane permeabilization involved in apoptotic signaling pathway	7	1	0.07	677	0.0676	0.0676	Slc25a5
GO:0060754	positive regulation of mast cell chemotaxis	7	1	0.07	678	0.0676	0.0676	Ccl5
GO:0051096	positive regulation of helicase activity	7	1	0.07	679	0.0676	0.0676	Rpa2
GO:0002583	regulation of antigen processing and presentation of peptide antigen	7	1	0.07	680	0.0676	0.0676	Pycard
GO:0044351	macropinocytosis	7	1	0.07	681	0.0676	0.0676	Pycard
GO:0050703	interleukin-1 alpha secretion	7	1	0.07	682	0.0676	0.0676	S100a13
GO:0043615	astrocyte cell migration	7	1	0.07	683	0.0676	0.0676	Ccl3
GO:0071493	cellular response to UV-B	7	1	0.07	684	0.0676	0.0676	Crip1
GO:0090148	membrane fission	7	1	0.07	685	0.0676	0.0676	Mx1
GO:0060613	fat pad development	7	1	0.07	686	0.0676	0.0676	Ubb
GO:0005981	regulation of glycogen catabolic process	7	1	0.07	687	0.0676	0.0676	Ppp1ca
GO:0030049	muscle filament sliding	7	1	0.07	688	0.0676	0.0676	Myl6
GO:1905522	negative regulation of macrophage migration	7	1	0.07	689	0.0676	0.0676	Ddt
GO:0034137	positive regulation of toll-like receptor 2 signaling pathway	7	1	0.07	690	0.0676	0.0676	Cyba
GO:0043353	enucleate erythrocyte differentiation	7	1	0.07	691	0.0676	0.0676	Id2
GO:0032815	negative regulation of natural killer cell activation	7	1	0.07	692	0.0676	0.0676	Pglyrp1
GO:0032071	regulation of endodeoxyribonuclease activity	7	1	0.07	693	0.0676	0.0676	Gzma
GO:1990144	intrinsic apoptotic signaling pathway in response to hypoxia	7	1	0.07	694	0.0676	0.0676	Tmbim6
GO:0071675	regulation of mononuclear cell migration	43	2	0.43	696	0.06809	0.06809	Ccl5 / Lgals3
GO:0060393	regulation of pathway-restricted SMAD protein phosphorylation	43	2	0.43	697	0.06809	0.06809	Csnk2b / Pmepa1
GO:0002437	inflammatory response to antigenic stimulus	43	2	0.43	698	0.06809	0.06809	Cd6 / Spn
GO:0051251	positive regulation of lymphocyte activation	249	8	2.48	213	0.06846	0.00346	Ccl5 / Cd6 / Icos / Lck / Lgals1 / Pycard / Spn / Tbx21
GO:0050921	positive regulation of chemotaxis	119	6	1.18	143	0.06915	0.00121	Ccl4 / Ccl5 / Cxcr3 / Dapk2 / Rac1 / Rac2
GO:0051345	positive regulation of hydrolase activity	451	11	4.49	251	0.07035	0.00542	Bak1 / Ccl3 / Ccl4 / Ccl5 / Ifi27l2a / Lck / Prelid1 / Pycard / Rhog / Rpa2 / S100a10
GO:1903076	regulation of protein localization to plasma membrane	96	3	0.95	702	0.07066	0.07066	Lgals3 / Rhog / Vamp8
GO:0051260	protein homooligomerization	291	6	2.89	703	0.07067	0.07067	Anxa6 / Cd3d / Derl1 / Prf1 / Pycard / Vasp
GO:0042269	regulation of natural killer cell mediated cytotoxicity	44	2	0.44	704	0.07088	0.07088	Lag3 / Tap1
GO:0090276	regulation of peptide hormone secretion	157	4	1.56	706	0.07161	0.07161	Ccl5 / Glrx / Sri / Ucp2
GO:0060326	cell chemotaxis	244	12	2.43	37	0.07167	5.8e-06	Ccl3 / Ccl4 / Ccl5 / Cxcr3 / Cxcr6 / Dapk2 / Ddt / Jaml / Lgals3 / Rac1 / Rac2 / Rhog
GO:0032496	response to lipopolysaccharide	223	5	2.22	707	0.07197	0.07197	Ccl5 / Cd6 / Gbp2 / Pycard / Vim
GO:0032956	regulation of actin cytoskeleton organization	293	6	2.91	708	0.07252	0.07252	Pycard / Rac1 / S100a10 / Tmsb4x / Vasp / Wdr1
GO:0050727	regulation of inflammatory response	272	9	2.71	160	0.07363	0.0016	Ccl3 / Ccl5 / Cd6 / Ctla2a / Ddt / Pglyrp1 / Pycard / Spn / Vamp8
GO:0002715	regulation of natural killer cell mediated immunity	45	2	0.45	709	0.07371	0.07371	Lag3 / Tap1
GO:0045071	negative regulation of viral genome replication	45	2	0.45	710	0.07371	0.07371	Ccl5 / Isg20
GO:0043949	regulation of cAMP-mediated signaling	45	2	0.45	711	0.07371	0.07371	Cxcr3 / Gnai2
GO:0045185	maintenance of protein location	98	3	0.97	712	0.07417	0.07417	Srgn / Sri / Tmsb4x
GO:0030073	insulin secretion	159	4	1.58	713	0.07426	0.07426	Ccl5 / Glrx / Sri / Ucp2
GO:1900024	regulation of substrate adhesion-dependent cell spreading	46	2	0.46	717	0.07657	0.07657	Rac1 / S100a10
GO:0051496	positive regulation of stress fiber assembly	46	2	0.46	718	0.07657	0.07657	Rac1 / S100a10
GO:0060389	pathway-restricted SMAD protein phosphorylation	46	2	0.46	719	0.07657	0.07657	Csnk2b / Pmepa1
GO:0033275	actin-myosin filament sliding	8	1	0.08	721	0.07688	0.07688	Myl6
GO:0021889	olfactory bulb interneuron differentiation	8	1	0.08	722	0.07688	0.07688	Rac1
GO:0046598	positive regulation of viral entry into host cell	8	1	0.08	723	0.07688	0.07688	Lgals1
GO:0031622	positive regulation of fever generation	8	1	0.08	724	0.07688	0.07688	Ccl5
GO:0002553	histamine secretion by mast cell	8	1	0.08	725	0.07688	0.07688	Vamp8
GO:0051683	establishment of Golgi localization	8	1	0.08	726	0.07688	0.07688	Slc9a3r1
GO:0042268	regulation of cytolysis	8	1	0.08	727	0.07688	0.07688	Pglyrp1
GO:0106072	negative regulation of adenylate cyclase-activating G protein-coupled receptor signaling pathway	8	1	0.08	728	0.07688	0.07688	Gnai2
GO:1902255	positive regulation of intrinsic apoptotic signaling pathway by p53 class mediator	8	1	0.08	729	0.07688	0.07688	Ubb
GO:0048563	post-embryonic animal organ morphogenesis	8	1	0.08	730	0.07688	0.07688	Bak1
GO:0006265	DNA topological change	8	1	0.08	731	0.07688	0.07688	Rpa2
GO:0060020	Bergmann glial cell differentiation	8	1	0.08	732	0.07688	0.07688	Vim
GO:0003149	membranous septum morphogenesis	8	1	0.08	733	0.07688	0.07688	Id2
GO:0001580	detection of chemical stimulus involved in sensory perception of bitter taste	8	1	0.08	734	0.07688	0.07688	Rtp4
GO:0071225	cellular response to muramyl dipeptide	8	1	0.08	735	0.07688	0.07688	Vim
GO:0002349	histamine production involved in inflammatory response	8	1	0.08	736	0.07688	0.07688	Vamp8
GO:0072683	T cell extravasation	8	1	0.08	737	0.07688	0.07688	Ccl5
GO:1901299	negative regulation of hydrogen peroxide-mediated programmed cell death	8	1	0.08	738	0.07688	0.07688	Glrx
GO:0002441	histamine secretion involved in inflammatory response	8	1	0.08	739	0.07688	0.07688	Vamp8
GO:0060352	cell adhesion molecule production	8	1	0.08	740	0.07688	0.07688	Glrx
GO:0032667	regulation of interleukin-23 production	8	1	0.08	741	0.07688	0.07688	Rac1
GO:0032627	interleukin-23 production	8	1	0.08	742	0.07688	0.07688	Rac1
GO:2001179	regulation of interleukin-10 secretion	8	1	0.08	743	0.07688	0.07688	Pycard
GO:2001140	positive regulation of phospholipid transport	8	1	0.08	744	0.07688	0.07688	Prelid1
GO:2001138	regulation of phospholipid transport	8	1	0.08	745	0.07688	0.07688	Prelid1
GO:0022028	tangential migration from the subventricular zone to the olfactory bulb	8	1	0.08	746	0.07688	0.07688	Rac1
GO:0043252	sodium-independent organic anion transport	8	1	0.08	747	0.07688	0.07688	Slco3a1
GO:1901857	positive regulation of cellular respiration	8	1	0.08	748	0.07688	0.07688	Prelid1
GO:0006986	response to unfolded protein	100	3	0.99	750	0.07776	0.07776	Bak1 / Derl1 / Tmbim6
GO:2001233	regulation of apoptotic signaling pathway	367	12	3.65	94	0.07822	0.0003	Bak1 / Dapk2 / Gnai2 / Lck / Lgals3 / Ppp1ca / Prelid1 / Pycard / Slc25a5 / Slc9a3r1 / Tmbim6 / Ubb
GO:0022408	negative regulation of cell-cell adhesion	162	4	1.61	753	0.07833	0.07833	Lag3 / Lgals3 / Spn / Tbx21
GO:0001910	regulation of leukocyte mediated cytotoxicity	79	6	0.79	78	0.0788	0.00013	H2-K1 / H2-Q6 / H2-Q7 / H2-T22 / Lag3 / Tap1
GO:0001954	positive regulation of cell-matrix adhesion	47	2	0.47	754	0.07947	0.07947	Rac1 / S100a10
GO:0002673	regulation of acute inflammatory response	47	2	0.47	755	0.07947	0.07947	Ccl5 / Spn
GO:0045744	negative regulation of G protein-coupled receptor signaling pathway	47	2	0.47	756	0.07947	0.07947	Ccl5 / Gnai2
GO:0008347	glial cell migration	47	2	0.47	757	0.07947	0.07947	Ccl3 / Vim
GO:0046718	viral entry into host cell	47	2	0.47	758	0.07947	0.07947	Lgals1 / Vamp8
GO:0031341	regulation of cell killing	93	8	0.93	34	0.07978	3.9e-06	H2-K1 / H2-Q6 / H2-Q7 / H2-T22 / Lag3 / Pglyrp1 / Prf1 / Tap1
GO:0002685	regulation of leukocyte migration	168	10	1.67	40	0.08186	6.8e-06	Ccl4 / Ccl5 / Cxcr3 / Dapk2 / Ddt / Lgals3 / Pycard / Rac1 / Rac2 / Spn
GO:0007186	G protein-coupled receptor signaling pathway	544	11	5.41	398	0.0822	0.01997	Ccl3 / Ccl4 / Ccl5 / Cxcr3 / Cxcr6 / Gnai2 / Gnb2 / Gng2 / Rac1 / Rac2 / Slc9a3r1
GO:0031663	lipopolysaccharide-mediated signaling pathway	48	2	0.48	762	0.0824	0.0824	Ccl5 / Cd6
GO:0045806	negative regulation of endocytosis	48	2	0.48	763	0.0824	0.0824	Cnn2 / Lgals3
GO:0007015	actin filament organization	349	10	3.47	190	0.08243	0.00257	Pstpip1 / Pycard / Rac1 / Rac2 / Rhog / S100a10 / Tmsb4x / Vasp / Wdr1 / Zyx
GO:0098657	import into cell	610	10	6.07	765	0.08312	0.08312	Actg1 / Clta / Cnn2 / Cyba / Dbnl / Lgals3 / Pstpip1 / Pycard / Rac1 / Vamp8
GO:0034764	positive regulation of transmembrane transport	166	4	1.65	766	0.08392	0.08392	Cxcr3 / Glrx / Slc9a3r1 / Sri
GO:1902903	regulation of supramolecular fiber organization	305	6	3.03	768	0.08418	0.08418	Pycard / Rac1 / S100a10 / Tmsb4x / Vasp / Wdr1
GO:0060627	regulation of vesicle-mediated transport	455	8	4.53	769	0.08439	0.08439	Cnn2 / Cyba / Glrx / Gnai2 / Lgals3 / Pycard / Rac2 / Vamp8
GO:0032413	negative regulation of ion transmembrane transporter activity	49	2	0.49	771	0.08537	0.08537	Slc9a3r1 / Sri
GO:0001736	establishment of planar polarity	49	2	0.49	772	0.08537	0.08537	Rac1 / Wdr1
GO:0010823	negative regulation of mitochondrion organization	49	2	0.49	773	0.08537	0.08537	Prelid1 / Slc25a5
GO:0042531	positive regulation of tyrosine phosphorylation of STAT protein	49	2	0.49	774	0.08537	0.08537	Ccl5 / Lck
GO:0007164	establishment of tissue polarity	49	2	0.49	775	0.08537	0.08537	Rac1 / Wdr1
GO:2000343	positive regulation of chemokine (C-X-C motif) ligand 2 production	9	1	0.09	776	0.08606	0.08606	Ccl5
GO:1900103	positive regulation of endoplasmic reticulum unfolded protein response	9	1	0.09	777	0.08606	0.08606	Bak1
GO:0045475	locomotor rhythm	9	1	0.09	778	0.08606	0.08606	Id2
GO:0002725	negative regulation of T cell cytokine production	9	1	0.09	779	0.08606	0.08606	Tbx21
GO:0031077	post-embryonic camera-type eye development	9	1	0.09	780	0.08606	0.08606	Bak1
GO:0031620	regulation of fever generation	9	1	0.09	781	0.08606	0.08606	Ccl5
GO:0032471	negative regulation of endoplasmic reticulum calcium ion concentration	9	1	0.09	782	0.08606	0.08606	Bak1
GO:2000109	regulation of macrophage apoptotic process	9	1	0.09	783	0.08606	0.08606	Ccl5
GO:0046643	regulation of gamma-delta T cell activation	9	1	0.09	784	0.08606	0.08606	Lck
GO:0002084	protein depalmitoylation	9	1	0.09	785	0.08606	0.08606	Abhd17a
GO:0006123	mitochondrial electron transport, cytochrome c to oxygen	9	1	0.09	786	0.08606	0.08606	Cox5b
GO:0006268	DNA unwinding involved in DNA replication	9	1	0.09	787	0.08606	0.08606	Rpa2
GO:0019646	aerobic electron transport chain	9	1	0.09	788	0.08606	0.08606	Cox5b
GO:0045586	regulation of gamma-delta T cell differentiation	9	1	0.09	789	0.08606	0.08606	Lck
GO:2000551	regulation of T-helper 2 cell cytokine production	9	1	0.09	790	0.08606	0.08606	Tbx21
GO:0072505	divalent inorganic anion homeostasis	9	1	0.09	791	0.08606	0.08606	Slc9a3r1
GO:0072506	trivalent inorganic anion homeostasis	9	1	0.09	792	0.08606	0.08606	Slc9a3r1
GO:0046485	ether lipid metabolic process	9	1	0.09	793	0.08606	0.08606	Pla2g16
GO:0072608	interleukin-10 secretion	9	1	0.09	794	0.08606	0.08606	Pycard
GO:0098734	macromolecule depalmitoylation	9	1	0.09	795	0.08606	0.08606	Abhd17a
GO:0055062	phosphate ion homeostasis	9	1	0.09	796	0.08606	0.08606	Slc9a3r1
GO:0032070	regulation of deoxyribonuclease activity	9	1	0.09	797	0.08606	0.08606	Gzma
GO:0051280	negative regulation of release of sequestered calcium ion into cytosol	9	1	0.09	798	0.08606	0.08606	Sri
GO:0071888	macrophage apoptotic process	9	1	0.09	799	0.08606	0.08606	Ccl5
GO:0043117	positive regulation of vascular permeability	9	1	0.09	800	0.08606	0.08606	Ccl4
GO:1900426	positive regulation of defense response to bacterium	9	1	0.09	801	0.08606	0.08606	Cyba
GO:0045988	negative regulation of striated muscle contraction	9	1	0.09	802	0.08606	0.08606	Sri
GO:0070257	positive regulation of mucus secretion	9	1	0.09	803	0.08606	0.08606	Cyba
GO:0061024	membrane organization	536	9	5.33	804	0.0869	0.0869	Bak1 / Cnp / Mx1 / Prelid1 / Rac1 / Rtp4 / S100a10 / Slc25a5 / Vamp8
GO:0002705	positive regulation of leukocyte mediated immunity	139	7	1.38	110	0.08749	0.00048	H2-K1 / H2-Q6 / H2-Q7 / H2-T22 / Lag3 / Tbx21 / Vamp8
GO:0040011	locomotion	1395	28	13.88	88	0.08756	0.00024	Anxa6 / Ccl3 / Ccl4 / Ccl5 / Cnn2 / Csnk2b / Cxcr3 / Cxcr6 / Dapk2 / Ddt / Glipr2 / Gnai2 / Id2 / Jaml / Lgals3 / Lsp1 / Pycard / Rac1 / Rac2 / Rhog / Selplg / Slc9a3r1 / Spn / Tbx21 / Tmsb4x / Vasp / Vim / Wdr1
GO:0051828	entry into other organism involved in symbiotic interaction	50	2	0.5	805	0.08836	0.08836	Lgals1 / Vamp8
GO:0051806	entry into cell of other organism involved in symbiotic interaction	50	2	0.5	806	0.08836	0.08836	Lgals1 / Vamp8
GO:0021872	forebrain generation of neurons	50	2	0.5	807	0.08836	0.08836	Rac1 / Ubb
GO:0035456	response to interferon-beta	50	2	0.5	808	0.08836	0.08836	Gbp2 / Igtp
GO:0030260	entry into host cell	50	2	0.5	809	0.08836	0.08836	Lgals1 / Vamp8
GO:0044409	entry into host	50	2	0.5	810	0.08836	0.08836	Lgals1 / Vamp8
GO:0032651	regulation of interleukin-1 beta production	50	2	0.5	811	0.08836	0.08836	Ccl3 / Pycard
GO:0046887	positive regulation of hormone secretion	106	3	1.05	812	0.08897	0.08897	Glrx / Sri / Vamp8
GO:0050714	positive regulation of protein secretion	238	5	2.37	813	0.08915	0.08915	Ccl3 / Glrx / Pycard / Sri / Vamp8
GO:0019058	viral life cycle	170	4	1.69	814	0.08971	0.08971	Ccl5 / Isg20 / Lgals1 / Vamp8
GO:0010001	glial cell differentiation	170	4	1.69	815	0.08971	0.08971	Cnp / Id2 / Vim / Wdr1
GO:0051893	regulation of focal adhesion assembly	51	2	0.51	816	0.09139	0.09139	Rac1 / S100a10
GO:0002886	regulation of myeloid leukocyte mediated immunity	51	2	0.51	817	0.09139	0.09139	Rac2 / Vamp8
GO:0030239	myofibril assembly	51	2	0.51	818	0.09139	0.09139	Actg1 / Wdr1
GO:0050854	regulation of antigen receptor-mediated signaling pathway	51	2	0.51	819	0.09139	0.09139	Lck / Lgals3
GO:0042775	mitochondrial ATP synthesis coupled electron transport	51	2	0.51	820	0.09139	0.09139	Cox5b / Uqcrc1
GO:0090109	regulation of cell-substrate junction assembly	51	2	0.51	821	0.09139	0.09139	Rac1 / S100a10
GO:0007162	negative regulation of cell adhesion	240	5	2.39	822	0.09158	0.09158	Lag3 / Lgals1 / Lgals3 / Spn / Tbx21
GO:0002237	response to molecule of bacterial origin	240	5	2.39	823	0.09158	0.09158	Ccl5 / Cd6 / Gbp2 / Pycard / Vim
GO:0002684	positive regulation of immune system process	794	24	7.9	24	0.09206	9.8e-07	Ccl3 / Ccl4 / Ccl5 / Cd6 / Cyba / Dapk2 / H2-K1 / H2-Q6 / H2-Q7 / H2-T22 / Icos / Id2 / Irf7 / Lag3 / Lck / Lgals1 / Lgals3 / Pycard / Rac1 / Rac2 / Spn / Tbx21 / Vamp8 / Zbp1
GO:0032609	interferon-gamma production	108	3	1.07	824	0.09285	0.09285	Pglyrp1 / Pycard / Spn
GO:0097193	intrinsic apoptotic signaling pathway	266	9	2.65	150	0.0938	0.00137	Bak1 / Crip1 / Dapk2 / Lck / Pycard / Shisa5 / Slc9a3r1 / Tmbim6 / Ubb
GO:0030100	regulation of endocytosis	242	5	2.41	825	0.09406	0.09406	Cnn2 / Cyba / Lgals3 / Pycard / Vamp8
GO:0009416	response to light stimulus	242	5	2.41	826	0.09406	0.09406	Bak1 / Crip1 / Id2 / Ppp1ca / Ube2a
GO:0010810	regulation of cell-substrate adhesion	173	4	1.72	827	0.09417	0.09417	Lgals1 / Rac1 / Rac2 / S100a10
GO:0042773	ATP synthesis coupled electron transport	52	2	0.52	828	0.09445	0.09445	Cox5b / Uqcrc1
GO:0014911	positive regulation of smooth muscle cell migration	52	2	0.52	829	0.09445	0.09445	Ccl5 / Tmsb4x
GO:0070936	protein K48-linked ubiquitination	52	2	0.52	830	0.09445	0.09445	Nmi / Ube2a
GO:0002699	positive regulation of immune effector process	209	8	2.08	142	0.09481	0.00116	H2-K1 / H2-Q6 / H2-Q7 / H2-T22 / Lag3 / Rac2 / Tbx21 / Vamp8
GO:0001973	adenosine receptor signaling pathway	10	1	0.1	832	0.09516	0.09516	Gnai2
GO:0010917	negative regulation of mitochondrial membrane potential	10	1	0.1	833	0.09516	0.09516	Prelid1
GO:0021854	hypothalamus development	10	1	0.1	834	0.09516	0.09516	Ubb
GO:0008626	granzyme-mediated apoptotic signaling pathway	10	1	0.1	835	0.09516	0.09516	Gzmb
GO:0002883	regulation of hypersensitivity	10	1	0.1	836	0.09516	0.09516	Spn
GO:0032927	positive regulation of activin receptor signaling pathway	10	1	0.1	837	0.09516	0.09516	Csnk2b
GO:0051095	regulation of helicase activity	10	1	0.1	838	0.09516	0.09516	Rpa2
GO:0031652	positive regulation of heat generation	10	1	0.1	839	0.09516	0.09516	Ccl5
GO:0060700	regulation of ribonuclease activity	10	1	0.1	840	0.09516	0.09516	Tmbim6
GO:0002579	positive regulation of antigen processing and presentation	10	1	0.1	841	0.09516	0.09516	Pycard
GO:0010288	response to lead ion	10	1	0.1	842	0.09516	0.09516	Ppp1ca
GO:1904948	midbrain dopaminergic neuron differentiation	10	1	0.1	843	0.09516	0.09516	Rac1
GO:0043652	engulfment of apoptotic cell	10	1	0.1	844	0.09516	0.09516	Rac1
GO:0002674	negative regulation of acute inflammatory response	10	1	0.1	845	0.09516	0.09516	Spn
GO:0001765	membrane raft assembly	10	1	0.1	846	0.09516	0.09516	S100a10
GO:0090186	regulation of pancreatic juice secretion	10	1	0.1	847	0.09516	0.09516	Vamp8
GO:0060068	vagina development	10	1	0.1	848	0.09516	0.09516	Bak1
GO:0075522	IRES-dependent viral translational initiation	10	1	0.1	849	0.09516	0.09516	Eif3f
GO:1900038	negative regulation of cellular response to hypoxia	10	1	0.1	850	0.09516	0.09516	Tmbim6
GO:0035810	positive regulation of urine volume	10	1	0.1	851	0.09516	0.09516	Gnai2
GO:0050665	hydrogen peroxide biosynthetic process	10	1	0.1	852	0.09516	0.09516	Cyba
GO:0034116	positive regulation of heterotypic cell-cell adhesion	10	1	0.1	853	0.09516	0.09516	Lck
GO:0035588	G protein-coupled purinergic receptor signaling pathway	10	1	0.1	854	0.09516	0.09516	Gnai2
GO:0086103	G protein-coupled receptor signaling pathway involved in heart process	10	1	0.1	855	0.09516	0.09516	Gnai2
GO:0043497	regulation of protein heterodimerization activity	10	1	0.1	856	0.09516	0.09516	Bak1
GO:0060394	negative regulation of pathway-restricted SMAD protein phosphorylation	10	1	0.1	857	0.09516	0.09516	Pmepa1
GO:0043471	regulation of cellular carbohydrate catabolic process	10	1	0.1	858	0.09516	0.09516	Ppp1ca
GO:0010644	cell communication by electrical coupling	10	1	0.1	859	0.09516	0.09516	Sri
GO:0097421	liver regeneration	10	1	0.1	860	0.09516	0.09516	Csnk2b
GO:0071863	regulation of cell proliferation in bone marrow	10	1	0.1	861	0.09516	0.09516	Lgals3
GO:0051284	positive regulation of sequestering of calcium ion	10	1	0.1	862	0.09516	0.09516	Sri
GO:0032610	interleukin-1 alpha production	10	1	0.1	863	0.09516	0.09516	S100a13
GO:0050912	detection of chemical stimulus involved in sensory perception of taste	10	1	0.1	864	0.09516	0.09516	Rtp4
GO:0050913	sensory perception of bitter taste	10	1	0.1	865	0.09516	0.09516	Rtp4
GO:0045350	interferon-beta biosynthetic process	10	1	0.1	866	0.09516	0.09516	Nmi
GO:0003093	regulation of glomerular filtration	10	1	0.1	867	0.09516	0.09516	Cyba
GO:0045357	regulation of interferon-beta biosynthetic process	10	1	0.1	868	0.09516	0.09516	Nmi
GO:0042063	gliogenesis	243	5	2.42	869	0.09531	0.09531	Ccl3 / Cnp / Id2 / Vim / Wdr1
GO:0001775	cell activation	817	25	8.13	20	0.09612	4.5e-07	Bak1 / Ccl5 / Cd3d / Cd48 / Cd6 / Cd8a / Ctla2a / Icos / Id2 / Jaml / Lag3 / Lat / Lck / Lgals1 / Lgals3 / Pglyrp1 / Prelid1 / Prf1 / Psmb10 / Pycard / Rac2 / Selplg / Spn / Tbx21 / Vamp8
GO:0006937	regulation of muscle contraction	110	3	1.09	871	0.0968	0.0968	Anxa6 / Lck / Sri
GO:0032412	regulation of ion transmembrane transporter activity	175	4	1.74	872	0.09721	0.09721	Fxyd5 / Glrx / Slc9a3r1 / Sri
GO:0042440	pigment metabolic process	53	2	0.53	873	0.09754	0.09754	Ddt / Tmem14c
GO:0050766	positive regulation of phagocytosis	53	2	0.53	874	0.09754	0.09754	Cyba / Pycard
GO:1903078	positive regulation of protein localization to plasma membrane	53	2	0.53	875	0.09754	0.09754	Lgals3 / Rhog
GO:0006801	superoxide metabolic process	53	2	0.53	876	0.09754	0.09754	Cyba / Gnai2
GO:2001238	positive regulation of extrinsic apoptotic signaling pathway	53	2	0.53	877	0.09754	0.09754	Ppp1ca / Pycard
GO:0002761	regulation of myeloid leukocyte differentiation	111	3	1.1	878	0.0988	0.0988	Ccl3 / Ccl5 / Id2
GO:0033993	response to lipid	552	9	5.49	880	0.09965	0.09965	Ccl5 / Cd6 / Csnk2b / Gbp2 / Glrx / Gng2 / H2afz / Pycard / Vim
GO:0002690	positive regulation of leukocyte chemotaxis	77	5	0.77	132	0.10046	0.00101	Ccl4 / Ccl5 / Dapk2 / Rac1 / Rac2
GO:0032663	regulation of interleukin-2 production	54	2	0.54	882	0.10065	0.10065	Lag3 / Tbx21
GO:0030183	B cell differentiation	112	3	1.11	883	0.10081	0.10081	Bak1 / Id2 / Lgals1
GO:0032273	positive regulation of protein polymerization	113	3	1.12	886	0.10285	0.10285	Pycard / Rac1 / Vasp
GO:0009612	response to mechanical stimulus	113	3	1.12	887	0.10285	0.10285	Cnn2 / Lck / Rac1
GO:1904064	positive regulation of cation transmembrane transport	113	3	1.12	888	0.10285	0.10285	Cxcr3 / Glrx / Sri
GO:0006909	phagocytosis	179	4	1.78	889	0.10341	0.10341	Cnn2 / Cyba / Pycard / Rac1
GO:0032922	circadian regulation of gene expression	55	2	0.55	890	0.1038	0.1038	Id2 / Ppp1ca
GO:0061178	regulation of insulin secretion involved in cellular response to glucose stimulus	55	2	0.55	891	0.1038	0.1038	Sri / Ucp2
GO:1900118	negative regulation of execution phase of apoptosis	11	1	0.11	895	0.10417	0.10417	Cxcr3
GO:0002756	MyD88-independent toll-like receptor signaling pathway	11	1	0.11	896	0.10417	0.10417	Irf7
GO:0042989	sequestering of actin monomers	11	1	0.11	897	0.10417	0.10417	Tmsb4x
GO:0001977	renal system process involved in regulation of blood volume	11	1	0.11	898	0.10417	0.10417	Cyba
GO:1902916	positive regulation of protein polyubiquitination	11	1	0.11	899	0.10417	0.10417	Nmi
GO:0095500	acetylcholine receptor signaling pathway	11	1	0.11	900	0.10417	0.10417	Gnai2
GO:0002862	negative regulation of inflammatory response to antigenic stimulus	11	1	0.11	901	0.10417	0.10417	Spn
GO:1901077	regulation of relaxation of muscle	11	1	0.11	902	0.10417	0.10417	Sri
GO:1905144	response to acetylcholine	11	1	0.11	903	0.10417	0.10417	Gnai2
GO:1905145	cellular response to acetylcholine	11	1	0.11	904	0.10417	0.10417	Gnai2
GO:1903831	signal transduction involved in cellular response to ammonium ion	11	1	0.11	905	0.10417	0.10417	Gnai2
GO:0002524	hypersensitivity	11	1	0.11	906	0.10417	0.10417	Spn
GO:0106070	regulation of adenylate cyclase-activating G protein-coupled receptor signaling pathway	11	1	0.11	907	0.10417	0.10417	Gnai2
GO:0006122	mitochondrial electron transport, ubiquinol to cytochrome c	11	1	0.11	908	0.10417	0.10417	Uqcrc1
GO:0002638	negative regulation of immunoglobulin production	11	1	0.11	909	0.10417	0.10417	Tmbim6
GO:0035791	platelet-derived growth factor receptor-beta signaling pathway	11	1	0.11	910	0.10417	0.10417	Glrx
GO:0033632	regulation of cell-cell adhesion mediated by integrin	11	1	0.11	911	0.10417	0.10417	Ccl5
GO:0001820	serotonin secretion	11	1	0.11	912	0.10417	0.10417	Lgals3
GO:0030011	maintenance of cell polarity	11	1	0.11	913	0.10417	0.10417	Wdr1
GO:0034135	regulation of toll-like receptor 2 signaling pathway	11	1	0.11	914	0.10417	0.10417	Cyba
GO:0006895	Golgi to endosome transport	11	1	0.11	915	0.10417	0.10417	Sys1
GO:1905666	regulation of protein localization to endosome	11	1	0.11	916	0.10417	0.10417	Abhd17a
GO:1905668	positive regulation of protein localization to endosome	11	1	0.11	917	0.10417	0.10417	Abhd17a
GO:2000650	negative regulation of sodium ion transmembrane transporter activity	11	1	0.11	918	0.10417	0.10417	Slc9a3r1
GO:0034244	negative regulation of transcription elongation from RNA polymerase II promoter	11	1	0.11	919	0.10417	0.10417	Supt4a
GO:0001660	fever generation	11	1	0.11	920	0.10417	0.10417	Ccl5
GO:0060456	positive regulation of digestive system process	11	1	0.11	921	0.10417	0.10417	Vamp8
GO:0071838	cell proliferation in bone marrow	11	1	0.11	922	0.10417	0.10417	Lgals3
GO:0050907	detection of chemical stimulus involved in sensory perception	11	1	0.11	923	0.10417	0.10417	Rtp4
GO:0045955	negative regulation of calcium ion-dependent exocytosis	11	1	0.11	924	0.10417	0.10417	Gnai2
GO:0070293	renal absorption	11	1	0.11	925	0.10417	0.10417	Slc9a3r1
GO:0090073	positive regulation of protein homodimerization activity	11	1	0.11	926	0.10417	0.10417	Lgals3
GO:1901841	regulation of high voltage-gated calcium channel activity	11	1	0.11	927	0.10417	0.10417	Sri
GO:0070255	regulation of mucus secretion	11	1	0.11	928	0.10417	0.10417	Cyba
GO:2000320	negative regulation of T-helper 17 cell differentiation	11	1	0.11	929	0.10417	0.10417	Tbx21
GO:2000317	negative regulation of T-helper 17 type immune response	11	1	0.11	930	0.10417	0.10417	Tbx21
GO:0019882	antigen processing and presentation	83	7	0.83	54	0.10419	1.8e-05	H2-K1 / H2-Q6 / H2-Q7 / H2-T22 / Psmb9 / Pycard / Tap1
GO:0014013	regulation of gliogenesis	114	3	1.13	931	0.10489	0.10489	Id2 / Vim / Wdr1
GO:0016477	cell migration	1154	25	11.48	81	0.10649	0.00017	Anxa6 / Ccl3 / Ccl4 / Ccl5 / Cnn2 / Csnk2b / Cxcr3 / Cxcr6 / Dapk2 / Ddt / Glipr2 / Gnai2 / Jaml / Lgals3 / Pycard / Rac1 / Rac2 / Rhog / Selplg / Slc9a3r1 / Spn / Tbx21 / Tmsb4x / Vim / Wdr1
GO:0046879	hormone secretion	252	5	2.51	934	0.10693	0.10693	Ccl5 / Glrx / Sri / Ucp2 / Vamp8
GO:0051101	regulation of DNA binding	115	3	1.14	935	0.10696	0.10696	Gzma / Id2 / Sri
GO:0070059	intrinsic apoptotic signaling pathway in response to endoplasmic reticulum stress	56	2	0.56	936	0.10697	0.10697	Bak1 / Tmbim6
GO:0032233	positive regulation of actin filament bundle assembly	56	2	0.56	937	0.10697	0.10697	Rac1 / S100a10
GO:0032722	positive regulation of chemokine production	56	2	0.56	938	0.10697	0.10697	Ccl5 / Pycard
GO:0034121	regulation of toll-like receptor signaling pathway	56	2	0.56	939	0.10697	0.10697	Cyba / Irf7
GO:0060395	SMAD protein signal transduction	56	2	0.56	940	0.10697	0.10697	Sub1 / Vim
GO:0030968	endoplasmic reticulum unfolded protein response	56	2	0.56	941	0.10697	0.10697	Bak1 / Derl1
GO:0017157	regulation of exocytosis	182	4	1.81	943	0.10818	0.10818	Glrx / Gnai2 / Rac2 / Vamp8
GO:0022898	regulation of transmembrane transporter activity	182	4	1.81	944	0.10818	0.10818	Fxyd5 / Glrx / Slc9a3r1 / Sri
GO:0007178	transmembrane receptor protein serine/threonine kinase signaling pathway	253	5	2.52	945	0.10826	0.10826	Csnk2b / Pmepa1 / Sub1 / Vim / Zyx
GO:1904375	regulation of protein localization to cell periphery	116	3	1.15	946	0.10904	0.10904	Lgals3 / Rhog / Vamp8
GO:0032103	positive regulation of response to external stimulus	249	11	2.48	63	0.10955	3.9e-05	Ccl3 / Ccl4 / Ccl5 / Cd6 / Cxcr3 / Cyba / Dapk2 / Ddt / Rac1 / Rac2 / Vamp8
GO:0032102	negative regulation of response to external stimulus	254	5	2.53	947	0.1096	0.1096	Ctla2a / Ddt / Pglyrp1 / Pycard / Spn
GO:1901700	response to oxygen-containing compound	1067	15	10.61	949	0.10977	0.10977	Ccl5 / Cd6 / Csnk2b / Gbp2 / Glrx / Gnai2 / Gng2 / H2afz / Lck / Pycard / Serpina3g / Sri / Tmbim6 / Ucp2 / Vim
GO:0006812	cation transport	782	17	7.78	171	0.11016	0.00197	Anxa6 / Atp6v1f / Bak1 / Ccl4 / Ccl5 / Cox5b / Cxcr3 / Cyba / Fxyd5 / Glrx / Gnai2 / Lck / Lgals3 / Slc9a3r1 / Sri / Tmbim6 / Vamp8
GO:1903391	regulation of adherens junction organization	57	2	0.57	950	0.11016	0.11016	Rac1 / S100a10
GO:0051093	negative regulation of developmental process	813	12	8.09	952	0.11089	0.11089	Cxcr3 / H2-K1 / Hopx / Id2 / Lgals1 / Pglyrp1 / Plac8 / Sra1 / Srgn / Tbx21 / Vim / Zfp706
GO:0050709	negative regulation of protein secretion	117	3	1.16	953	0.11114	0.11114	Srgn / Tmbim6 / Ucp2
GO:0045730	respiratory burst	21	3	0.21	140	0.11166	0.00112	Cyba / Rac1 / Rac2
GO:0002793	positive regulation of peptide secretion	256	5	2.55	956	0.11231	0.11231	Ccl3 / Glrx / Pycard / Sri / Vamp8
GO:1903708	positive regulation of hemopoiesis	185	4	1.84	957	0.11304	0.11304	Ccl3 / Ccl5 / Id2 / Lck
GO:2000341	regulation of chemokine (C-X-C motif) ligand 2 production	12	1	0.12	959	0.11308	0.11308	Ccl5
GO:0030157	pancreatic juice secretion	12	1	0.12	960	0.11308	0.11308	Vamp8
GO:0097201	negative regulation of transcription from RNA polymerase II promoter in response to stress	12	1	0.12	961	0.11308	0.11308	Tmbim6
GO:2000484	positive regulation of interleukin-8 secretion	12	1	0.12	962	0.11308	0.11308	Pycard
GO:0045198	establishment of epithelial cell apical/basal polarity	12	1	0.12	963	0.11308	0.11308	Slc9a3r1
GO:0007214	gamma-aminobutyric acid signaling pathway	12	1	0.12	964	0.11308	0.11308	Gnai2
GO:1902306	negative regulation of sodium ion transmembrane transport	12	1	0.12	965	0.11308	0.11308	Slc9a3r1
GO:0002864	regulation of acute inflammatory response to antigenic stimulus	12	1	0.12	966	0.11308	0.11308	Spn
GO:0006968	cellular defense response	12	1	0.12	967	0.11308	0.11308	Lat
GO:0006972	hyperosmotic response	12	1	0.12	968	0.11308	0.11308	Rac1
GO:0031650	regulation of heat generation	12	1	0.12	969	0.11308	0.11308	Ccl5
GO:0048715	negative regulation of oligodendrocyte differentiation	12	1	0.12	970	0.11308	0.11308	Id2
GO:0042159	lipoprotein catabolic process	12	1	0.12	971	0.11308	0.11308	Abhd17a
GO:0002517	T cell tolerance induction	12	1	0.12	972	0.11308	0.11308	Icos
GO:0010226	response to lithium ion	12	1	0.12	973	0.11308	0.11308	Id2
GO:0030836	positive regulation of actin filament depolymerization	12	1	0.12	974	0.11308	0.11308	Wdr1
GO:0006107	oxaloacetate metabolic process	12	1	0.12	975	0.11308	0.11308	Mdh2
GO:0048541	Peyer's patch development	12	1	0.12	976	0.11308	0.11308	Id2
GO:0048537	mucosal-associated lymphoid tissue development	12	1	0.12	977	0.11308	0.11308	Id2
GO:0090197	positive regulation of chemokine secretion	12	1	0.12	978	0.11308	0.11308	Pycard
GO:0003161	cardiac conduction system development	12	1	0.12	979	0.11308	0.11308	Id2
GO:0048012	hepatocyte growth factor receptor signaling pathway	12	1	0.12	980	0.11308	0.11308	Rac1
GO:0001821	histamine secretion	12	1	0.12	981	0.11308	0.11308	Vamp8
GO:0035813	regulation of renal sodium excretion	12	1	0.12	982	0.11308	0.11308	Gnai2
GO:0009886	post-embryonic animal morphogenesis	12	1	0.12	983	0.11308	0.11308	Bak1
GO:0072540	T-helper 17 cell lineage commitment	12	1	0.12	984	0.11308	0.11308	Tbx21
GO:0045060	negative thymic T cell selection	12	1	0.12	985	0.11308	0.11308	Spn
GO:0071285	cellular response to lithium ion	12	1	0.12	986	0.11308	0.11308	Id2
GO:1901298	regulation of hydrogen peroxide-mediated programmed cell death	12	1	0.12	987	0.11308	0.11308	Glrx
GO:0051152	positive regulation of smooth muscle cell differentiation	12	1	0.12	988	0.11308	0.11308	Tmsb4x
GO:0071712	ER-associated misfolded protein catabolic process	12	1	0.12	989	0.11308	0.11308	Derl1
GO:0060314	regulation of ryanodine-sensitive calcium-release channel activity	12	1	0.12	990	0.11308	0.11308	Sri
GO:0006098	pentose-phosphate shunt	12	1	0.12	991	0.11308	0.11308	Tkt
GO:0006662	glycerol ether metabolic process	12	1	0.12	992	0.11308	0.11308	Pla2g16
GO:0007183	SMAD protein complex assembly	12	1	0.12	993	0.11308	0.11308	Pmepa1
GO:0045454	cell redox homeostasis	58	2	0.58	994	0.11339	0.11339	Glrx / Sh3bgrl3
GO:0032410	negative regulation of transporter activity	58	2	0.58	995	0.11339	0.11339	Slc9a3r1 / Sri
GO:0046649	lymphocyte activation	620	23	6.17	13	0.11357	4.6e-08	Bak1 / Ccl5 / Cd3d / Cd48 / Cd6 / Cd8a / Ctla2a / Icos / Id2 / Jaml / Lag3 / Lat / Lck / Lgals1 / Lgals3 / Pglyrp1 / Prelid1 / Prf1 / Psmb10 / Pycard / Rac2 / Spn / Tbx21
GO:0009914	hormone transport	257	5	2.56	996	0.11367	0.11367	Ccl5 / Glrx / Sri / Ucp2 / Vamp8
GO:0030334	regulation of cell migration	742	17	7.38	139	0.11395	0.00112	Ccl4 / Ccl5 / Cnn2 / Csnk2b / Cxcr3 / Dapk2 / Ddt / Glipr2 / Gnai2 / Lgals3 / Pycard / Rac1 / Rac2 / Slc9a3r1 / Spn / Tmsb4x / Vim
GO:1903169	regulation of calcium ion transmembrane transport	119	3	1.18	998	0.11538	0.11538	Cxcr3 / Cyba / Sri
GO:0045453	bone resorption	59	2	0.59	1001	0.11663	0.11663	Rac1 / Rac2
GO:1904377	positive regulation of protein localization to cell periphery	59	2	0.59	1002	0.11663	0.11663	Lgals3 / Rhog
GO:0042093	T-helper cell differentiation	59	2	0.59	1003	0.11663	0.11663	Spn / Tbx21
GO:1903900	regulation of viral life cycle	120	3	1.19	1004	0.11752	0.11752	Ccl5 / Isg20 / Lgals1
GO:0035966	response to topologically incorrect protein	121	3	1.2	1005	0.11968	0.11968	Bak1 / Derl1 / Tmbim6
GO:0032271	regulation of protein polymerization	189	4	1.88	1006	0.11968	0.11968	Pycard / Rac1 / Tmsb4x / Vasp
GO:0070509	calcium ion import	60	2	0.6	1007	0.1199	0.1199	Anxa6 / Lgals3
GO:0002294	CD4-positive, alpha-beta T cell differentiation involved in immune response	60	2	0.6	1008	0.1199	0.1199	Spn / Tbx21
GO:0003013	circulatory system process	338	6	3.36	1009	0.12126	0.12126	Ccl4 / Cyba / Gnai2 / Hopx / Id2 / Sri
GO:0051270	regulation of cellular component movement	839	18	8.35	165	0.12172	0.00168	Ccl4 / Ccl5 / Cnn2 / Csnk2b / Cxcr3 / Dapk2 / Ddt / Glipr2 / Gnai2 / Lgals3 / Pycard / Rac1 / Rac2 / Slc9a3r1 / Spn / Sri / Tmsb4x / Vim
GO:0002792	negative regulation of peptide secretion	122	3	1.21	1011	0.12185	0.12185	Srgn / Tmbim6 / Ucp2
GO:0042994	cytoplasmic sequestering of transcription factor	13	1	0.13	1012	0.12191	0.12191	Sri
GO:0042492	gamma-delta T cell differentiation	13	1	0.13	1013	0.12191	0.12191	Lck
GO:0045109	intermediate filament organization	13	1	0.13	1014	0.12191	0.12191	Vim
GO:0046628	positive regulation of insulin receptor signaling pathway	13	1	0.13	1015	0.12191	0.12191	Gnai2
GO:0014041	regulation of neuron maturation	13	1	0.13	1016	0.12191	0.12191	Rac1
GO:0051608	histamine transport	13	1	0.13	1017	0.12191	0.12191	Vamp8
GO:0071380	cellular response to prostaglandin E stimulus	13	1	0.13	1018	0.12191	0.12191	Gng2
GO:0090196	regulation of chemokine secretion	13	1	0.13	1019	0.12191	0.12191	Pycard
GO:0003159	morphogenesis of an endothelium	13	1	0.13	1020	0.12191	0.12191	Csnk2b
GO:0035745	T-helper 2 cell cytokine production	13	1	0.13	1021	0.12191	0.12191	Tbx21
GO:0030540	female genitalia development	13	1	0.13	1022	0.12191	0.12191	Bak1
GO:0045837	negative regulation of membrane potential	13	1	0.13	1023	0.12191	0.12191	Prelid1
GO:0060088	auditory receptor cell stereocilium organization	13	1	0.13	1024	0.12191	0.12191	Slc9a3r1
GO:0060644	mammary gland epithelial cell differentiation	13	1	0.13	1025	0.12191	0.12191	Id2
GO:0032785	negative regulation of DNA-templated transcription, elongation	13	1	0.13	1026	0.12191	0.12191	Supt4a
GO:0010820	positive regulation of T cell chemotaxis	13	1	0.13	1027	0.12191	0.12191	Ccl5
GO:0035812	renal sodium excretion	13	1	0.13	1028	0.12191	0.12191	Gnai2
GO:0072567	chemokine (C-X-C motif) ligand 2 production	13	1	0.13	1029	0.12191	0.12191	Ccl5
GO:0045059	positive thymic T cell selection	13	1	0.13	1030	0.12191	0.12191	Cd3d
GO:0035587	purinergic receptor signaling pathway	13	1	0.13	1031	0.12191	0.12191	Gnai2
GO:0061154	endothelial tube morphogenesis	13	1	0.13	1032	0.12191	0.12191	Csnk2b
GO:0043383	negative T cell selection	13	1	0.13	1033	0.12191	0.12191	Spn
GO:0061179	negative regulation of insulin secretion involved in cellular response to glucose stimulus	13	1	0.13	1034	0.12191	0.12191	Ucp2
GO:0042535	positive regulation of tumor necrosis factor biosynthetic process	13	1	0.13	1035	0.12191	0.12191	Spn
GO:0070307	lens fiber cell development	13	1	0.13	1036	0.12191	0.12191	Vim
GO:0031269	pseudopodium assembly	13	1	0.13	1037	0.12191	0.12191	Ccl5
GO:0048304	positive regulation of isotype switching to IgG isotypes	13	1	0.13	1038	0.12191	0.12191	Tbx21
GO:0006027	glycosaminoglycan catabolic process	13	1	0.13	1039	0.12191	0.12191	Pglyrp1
GO:0003084	positive regulation of systemic arterial blood pressure	13	1	0.13	1040	0.12191	0.12191	Cyba
GO:0051259	protein complex oligomerization	497	8	4.94	1041	0.12279	0.12279	Anxa6 / Ccl5 / Cd3d / Derl1 / Prf1 / Pycard / S100a10 / Vasp
GO:0032409	regulation of transporter activity	191	4	1.9	1042	0.12306	0.12306	Fxyd5 / Glrx / Slc9a3r1 / Sri
GO:1904427	positive regulation of calcium ion transmembrane transport	61	2	0.61	1043	0.12319	0.12319	Cxcr3 / Sri
GO:0032611	interleukin-1 beta production	61	2	0.61	1044	0.12319	0.12319	Ccl3 / Pycard
GO:0002293	alpha-beta T cell differentiation involved in immune response	61	2	0.61	1045	0.12319	0.12319	Spn / Tbx21
GO:0006928	movement of cell or subcellular component	1555	29	15.47	119	0.12346	0.00061	Anxa6 / Ccl3 / Ccl4 / Ccl5 / Cnn2 / Csnk2b / Cxcr3 / Cxcr6 / Dapk2 / Ddt / Glipr2 / Gnai2 / Jaml / Lgals3 / Myl6 / Pycard / Rac1 / Rac2 / Rhog / Selplg / Slc9a3r1 / Spn / Sri / Tbx21 / Tmsb4x / Ubb / Vasp / Vim / Wdr1
GO:0030072	peptide hormone secretion	192	4	1.91	1050	0.12477	0.12477	Ccl5 / Glrx / Sri / Ucp2
GO:0032535	regulation of cellular component size	341	6	3.39	1052	0.12498	0.12498	Pycard / Rac1 / Slc9a3r1 / Tmsb4x / Vasp / Wdr1
GO:0009306	protein secretion	471	10	4.68	388	0.12622	0.01929	Ccl3 / Ccl5 / Glrx / Pycard / S100a13 / Srgn / Sri / Tmbim6 / Ucp2 / Vamp8
GO:0035773	insulin secretion involved in cellular response to glucose stimulus	62	2	0.62	1054	0.12651	0.12651	Sri / Ucp2
GO:0042509	regulation of tyrosine phosphorylation of STAT protein	62	2	0.62	1055	0.12651	0.12651	Ccl5 / Lck
GO:0032623	interleukin-2 production	62	2	0.62	1056	0.12651	0.12651	Lag3 / Tbx21
GO:0002287	alpha-beta T cell activation involved in immune response	62	2	0.62	1057	0.12651	0.12651	Spn / Tbx21
GO:1904063	negative regulation of cation transmembrane transport	62	2	0.62	1058	0.12651	0.12651	Slc9a3r1 / Sri
GO:0070227	lymphocyte apoptotic process	78	4	0.78	285	0.12714	0.00758	Bak1 / Ccl5 / Lgals3 / Prelid1
GO:0043161	proteasome-mediated ubiquitin-dependent protein catabolic process	344	6	3.42	1060	0.12875	0.12875	Derl1 / Psmb10 / Psmb3 / Psmb9 / Tbx21 / Ube2a
GO:0006816	calcium ion transport	311	11	3.09	93	0.12919	0.00028	Anxa6 / Bak1 / Ccl4 / Ccl5 / Cxcr3 / Cyba / Gnai2 / Lck / Lgals3 / Sri / Tmbim6
GO:0006955	immune response	1110	42	11.04	2	0.12948	1.3e-14	Actg1 / Ccl3 / Ccl4 / Ccl5 / Cd3d / Cd48 / Cd6 / Cd8a / Cd8b1 / Cxcr3 / Cxcr6 / Cyba / Dbnl / Gbp2 / Gzmb / H2-K1 / H2-Q6 / H2-Q7 / H2-T22 / Irf7 / Isg20 / Lag3 / Lat / Lck / Lgals1 / Lgals3 / Mx1 / Nmi / Pglyrp1 / Prf1 / Pstpip1 / Pycard / Rac2 / Serpina3g / Spn / Tap1 / Tbx21 / Trafd1 / Vamp8 / Vim / Zbp1 / Zyx
GO:1990542	mitochondrial transmembrane transport	63	2	0.63	1061	0.12984	0.12984	Cox5b / Ucp2
GO:0030032	lamellipodium assembly	63	2	0.63	1062	0.12984	0.12984	Rac1 / Rac2
GO:0021954	central nervous system neuron development	63	2	0.63	1063	0.12984	0.12984	Rac1 / Ubb
GO:0032652	regulation of interleukin-1 production	63	2	0.63	1064	0.12984	0.12984	Ccl3 / Pycard
GO:0021895	cerebral cortex neuron differentiation	14	1	0.14	1066	0.13066	0.13066	Rac1
GO:1903779	regulation of cardiac conduction	14	1	0.14	1067	0.13066	0.13066	Sri
GO:0010421	hydrogen peroxide-mediated programmed cell death	14	1	0.14	1068	0.13066	0.13066	Glrx
GO:0042438	melanin biosynthetic process	14	1	0.14	1069	0.13066	0.13066	Ddt
GO:0002829	negative regulation of type 2 immune response	14	1	0.14	1070	0.13066	0.13066	Tbx21
GO:0017000	antibiotic biosynthetic process	14	1	0.14	1071	0.13066	0.13066	Cyba
GO:0014067	negative regulation of phosphatidylinositol 3-kinase signaling	14	1	0.14	1072	0.13066	0.13066	Slc9a3r1
GO:0051645	Golgi localization	14	1	0.14	1073	0.13066	0.13066	Slc9a3r1
GO:0071391	cellular response to estrogen stimulus	14	1	0.14	1074	0.13066	0.13066	Sra1
GO:0071379	cellular response to prostaglandin stimulus	14	1	0.14	1075	0.13066	0.13066	Gng2
GO:0048557	embryonic digestive tract morphogenesis	14	1	0.14	1076	0.13066	0.13066	Id2
GO:0090195	chemokine secretion	14	1	0.14	1077	0.13066	0.13066	Pycard
GO:0019081	viral translation	14	1	0.14	1078	0.13066	0.13066	Eif3f
GO:0033631	cell-cell adhesion mediated by integrin	14	1	0.14	1079	0.13066	0.13066	Ccl5
GO:0030502	negative regulation of bone mineralization	14	1	0.14	1080	0.13066	0.13066	Srgn
GO:1900017	positive regulation of cytokine production involved in inflammatory response	14	1	0.14	1081	0.13066	0.13066	Cd6
GO:1900037	regulation of cellular response to hypoxia	14	1	0.14	1082	0.13066	0.13066	Tmbim6
GO:0010819	regulation of T cell chemotaxis	14	1	0.14	1083	0.13066	0.13066	Ccl5
GO:0030002	cellular anion homeostasis	14	1	0.14	1084	0.13066	0.13066	Slc9a3r1
GO:0072520	seminiferous tubule development	14	1	0.14	1085	0.13066	0.13066	Ubb
GO:0045651	positive regulation of macrophage differentiation	14	1	0.14	1086	0.13066	0.13066	Id2
GO:0072672	neutrophil extravasation	14	1	0.14	1087	0.13066	0.13066	Jaml
GO:2000678	negative regulation of transcription regulatory region DNA binding	14	1	0.14	1088	0.13066	0.13066	Sri
GO:1903975	regulation of glial cell migration	14	1	0.14	1089	0.13066	0.13066	Vim
GO:0046184	aldehyde biosynthetic process	14	1	0.14	1090	0.13066	0.13066	Tkt
GO:0097468	programmed cell death in response to reactive oxygen species	14	1	0.14	1091	0.13066	0.13066	Glrx
GO:0030320	cellular monovalent inorganic anion homeostasis	14	1	0.14	1092	0.13066	0.13066	Slc9a3r1
GO:0071880	adenylate cyclase-activating adrenergic receptor signaling pathway	14	1	0.14	1093	0.13066	0.13066	Gnai2
GO:1900424	regulation of defense response to bacterium	14	1	0.14	1094	0.13066	0.13066	Cyba
GO:1901881	positive regulation of protein depolymerization	14	1	0.14	1095	0.13066	0.13066	Wdr1
GO:0031589	cell-substrate adhesion	269	5	2.68	1096	0.13067	0.13067	Lgals1 / Rac1 / Rac2 / S100a10 / Zyx
GO:0072331	signal transduction by p53 class mediator	126	3	1.25	1097	0.13068	0.13068	Pycard / Shisa5 / Ubb
GO:0051223	regulation of protein transport	588	9	5.85	1098	0.13207	0.13207	Ccl3 / Ccl5 / Glrx / Pycard / Srgn / Sri / Tmbim6 / Ucp2 / Vamp8
GO:0002274	myeloid leukocyte activation	168	6	1.67	268	0.13215	0.00668	Ccl5 / Cd48 / Lat / Pycard / Rac2 / Vamp8
GO:0045670	regulation of osteoclast differentiation	64	2	0.64	1099	0.1332	0.1332	Ccl3 / Ccl5
GO:0046427	positive regulation of JAK-STAT cascade	64	2	0.64	1100	0.1332	0.1332	Ccl5 / Lck
GO:0032024	positive regulation of insulin secretion	64	2	0.64	1101	0.1332	0.1332	Glrx / Sri
GO:0002703	regulation of leukocyte mediated immunity	202	10	2.01	61	0.13324	3.4e-05	H2-K1 / H2-Q6 / H2-Q7 / H2-T22 / Lag3 / Rac2 / Spn / Tap1 / Tbx21 / Vamp8
GO:0051336	regulation of hydrolase activity	786	16	7.82	240	0.13437	0.00506	Bak1 / Ccl3 / Ccl4 / Ccl5 / Gnai2 / Gzma / Ifi27l2a / Lck / Prelid1 / Psmb9 / Pycard / Rhog / Rpa2 / S100a10 / Serpina3g / Tmbim6
GO:1903532	positive regulation of secretion by cell	349	6	3.47	1102	0.13517	0.13517	Ccl3 / Glrx / Lgals3 / Pycard / Sri / Vamp8
GO:0007166	cell surface receptor signaling pathway	1897	27	18.87	487	0.13625	0.03362	Bak1 / Ccl3 / Ccl4 / Ccl5 / Cd3d / Cd6 / Cd8a / Csnk2b / Cxcr3 / Glrx / Gnai2 / Irf7 / Lag3 / Lat / Lck / Lgals3 / Nmi / Pmepa1 / Ppp1ca / Pycard / Rac1 / Slc9a3r1 / Spn / Sub1 / Vim / Zbp1 / Zyx
GO:0048708	astrocyte differentiation	65	2	0.65	1104	0.13657	0.13657	Id2 / Vim
GO:1905897	regulation of response to endoplasmic reticulum stress	65	2	0.65	1105	0.13657	0.13657	Bak1 / Tmbim6
GO:0050776	regulation of immune response	633	20	6.3	36	0.13687	4.5e-06	Cd48 / Cyba / H2-K1 / H2-Q6 / H2-Q7 / H2-T22 / Irf7 / Lag3 / Lck / Lgals3 / Nmi / Pglyrp1 / Pycard / Rac2 / Spn / Tap1 / Tbx21 / Trafd1 / Vamp8 / Zbp1
GO:1900119	positive regulation of execution phase of apoptosis	15	1	0.15	1106	0.13931	0.13931	Cxcr3
GO:0035493	SNARE complex assembly	15	1	0.15	1107	0.13931	0.13931	Vamp8
GO:0018904	ether metabolic process	15	1	0.15	1108	0.13931	0.13931	Pla2g16
GO:0030859	polarized epithelial cell differentiation	15	1	0.15	1109	0.13931	0.13931	Slc9a3r1
GO:0002689	negative regulation of leukocyte chemotaxis	15	1	0.15	1110	0.13931	0.13931	Ddt
GO:0033574	response to testosterone	15	1	0.15	1111	0.13931	0.13931	Csnk2b
GO:0044406	adhesion of symbiont to host	15	1	0.15	1112	0.13931	0.13931	Gbp2
GO:0019682	glyceraldehyde-3-phosphate metabolic process	15	1	0.15	1113	0.13931	0.13931	Tkt
GO:0045838	positive regulation of membrane potential	15	1	0.15	1114	0.13931	0.13931	Glrx
GO:0033008	positive regulation of mast cell activation involved in immune response	15	1	0.15	1115	0.13931	0.13931	Vamp8
GO:1900016	negative regulation of cytokine production involved in inflammatory response	15	1	0.15	1116	0.13931	0.13931	Pycard
GO:0090280	positive regulation of calcium ion import	15	1	0.15	1117	0.13931	0.13931	Lgals3
GO:0016045	detection of bacterium	15	1	0.15	1118	0.13931	0.13931	Pglyrp1
GO:0030033	microvillus assembly	15	1	0.15	1119	0.13931	0.13931	Slc9a3r1
GO:0043306	positive regulation of mast cell degranulation	15	1	0.15	1120	0.13931	0.13931	Vamp8
GO:0006837	serotonin transport	15	1	0.15	1121	0.13931	0.13931	Lgals3
GO:0051156	glucose 6-phosphate metabolic process	15	1	0.15	1122	0.13931	0.13931	Tkt
GO:0051131	chaperone-mediated protein complex assembly	15	1	0.15	1123	0.13931	0.13931	Hopx
GO:0031268	pseudopodium organization	15	1	0.15	1124	0.13931	0.13931	Ccl5
GO:0060307	regulation of ventricular cardiac muscle cell membrane repolarization	15	1	0.15	1125	0.13931	0.13931	Wdr1
GO:0003094	glomerular filtration	15	1	0.15	1126	0.13931	0.13931	Cyba
GO:0098543	detection of other organism	15	1	0.15	1127	0.13931	0.13931	Pglyrp1
GO:2001241	positive regulation of extrinsic apoptotic signaling pathway in absence of ligand	15	1	0.15	1128	0.13931	0.13931	Ppp1ca
GO:0007260	tyrosine phosphorylation of STAT protein	66	2	0.66	1131	0.13996	0.13996	Ccl5 / Lck
GO:0002637	regulation of immunoglobulin production	66	2	0.66	1132	0.13996	0.13996	Tbx21 / Tmbim6
GO:0045685	regulation of glial cell differentiation	66	2	0.66	1133	0.13996	0.13996	Id2 / Wdr1
GO:1903901	negative regulation of viral life cycle	66	2	0.66	1134	0.13996	0.13996	Ccl5 / Isg20
GO:0002292	T cell differentiation involved in immune response	66	2	0.66	1135	0.13996	0.13996	Spn / Tbx21
GO:0070252	actin-mediated cell contraction	66	2	0.66	1136	0.13996	0.13996	Myl6 / Sri
GO:2000145	regulation of cell motility	773	17	7.69	166	0.14021	0.00174	Ccl4 / Ccl5 / Cnn2 / Csnk2b / Cxcr3 / Dapk2 / Ddt / Glipr2 / Gnai2 / Lgals3 / Pycard / Rac1 / Rac2 / Slc9a3r1 / Spn / Tmsb4x / Vim
GO:1990266	neutrophil migration	98	9	0.97	22	0.14098	5.5e-07	Ccl3 / Ccl4 / Ccl5 / Dapk2 / Jaml / Lgals3 / Rac1 / Rac2 / Wdr1
GO:0010035	response to inorganic substance	354	6	3.52	1138	0.14173	0.14173	Crip1 / Glrx / Id2 / Lck / Ppp1ca / Ucp2
GO:1903305	regulation of regulated secretory pathway	131	3	1.3	1139	0.14203	0.14203	Gnai2 / Rac2 / Vamp8
GO:0033002	muscle cell proliferation	202	4	2.01	1141	0.14237	0.14237	Ccl5 / Cyba / Gnai2 / Id2
GO:0009411	response to UV	132	3	1.31	1144	0.14434	0.14434	Bak1 / Crip1 / Ube2a
GO:0030217	T cell differentiation	242	7	2.41	316	0.14449	0.01063	Cd3d / Cd8a / Ctla2a / Lck / Prelid1 / Spn / Tbx21
GO:0051241	negative regulation of multicellular organismal process	1022	18	10.17	336	0.14561	0.01274	Csnk2b / Cxcr3 / Cyba / Gnai2 / H2-K1 / Id2 / Lag3 / Lgals1 / Nmi / Pglyrp1 / Plac8 / Pycard / Rac1 / Srgn / Sri / Tbx21 / Vim / Zfp706
GO:0070588	calcium ion transmembrane transport	204	4	2.03	1145	0.146	0.146	Cxcr3 / Cyba / Lck / Sri
GO:0030279	negative regulation of ossification	68	2	0.68	1146	0.1468	0.1468	Id2 / Srgn
GO:0007045	cell-substrate adherens junction assembly	68	2	0.68	1147	0.1468	0.1468	Rac1 / S100a10
GO:0048041	focal adhesion assembly	68	2	0.68	1148	0.1468	0.1468	Rac1 / S100a10
GO:1904894	positive regulation of STAT cascade	68	2	0.68	1149	0.1468	0.1468	Ccl5 / Lck
GO:0065003	protein-containing complex assembly	1479	19	14.71	1150	0.14767	0.14767	Anxa6 / Ccl5 / Cd3d / Clta / Cyba / Dbnl / Derl1 / Hopx / Mx1 / Pmepa1 / Prf1 / Pstpip1 / Pycard / Rac1 / S100a10 / Sub1 / Tmsb4x / Vamp8 / Vasp
GO:0002687	positive regulation of leukocyte migration	122	8	1.21	59	0.14779	2.9e-05	Ccl4 / Ccl5 / Dapk2 / Lgals3 / Pycard / Rac1 / Rac2 / Spn
GO:0006936	muscle contraction	205	4	2.04	1151	0.14783	0.14783	Anxa6 / Lck / Myl6 / Sri
GO:0045665	negative regulation of neuron differentiation	205	4	2.04	1152	0.14783	0.14783	H2-K1 / Id2 / Lgals1 / Vim
GO:0097205	renal filtration	16	1	0.16	1153	0.14788	0.14788	Cyba
GO:0034643	establishment of mitochondrion localization, microtubule-mediated	16	1	0.16	1154	0.14788	0.14788	Ubb
GO:0048711	positive regulation of astrocyte differentiation	16	1	0.16	1155	0.14788	0.14788	Id2
GO:0015985	energy coupled proton transport, down electrochemical gradient	16	1	0.16	1156	0.14788	0.14788	Cox5b
GO:0015986	ATP synthesis coupled proton transport	16	1	0.16	1157	0.14788	0.14788	Cox5b
GO:0031649	heat generation	16	1	0.16	1158	0.14788	0.14788	Ccl5
GO:0047497	mitochondrion transport along microtubule	16	1	0.16	1159	0.14788	0.14788	Ubb
GO:0002577	regulation of antigen processing and presentation	16	1	0.16	1160	0.14788	0.14788	Pycard
GO:0010224	response to UV-B	16	1	0.16	1161	0.14788	0.14788	Crip1
GO:0009251	glucan catabolic process	16	1	0.16	1162	0.14788	0.14788	Ppp1ca
GO:1902236	negative regulation of endoplasmic reticulum stress-induced intrinsic apoptotic signaling pathway	16	1	0.16	1163	0.14788	0.14788	Tmbim6
GO:0040015	negative regulation of multicellular organism growth	16	1	0.16	1164	0.14788	0.14788	Plac8
GO:0033033	negative regulation of myeloid cell apoptotic process	16	1	0.16	1165	0.14788	0.14788	Ccl5
GO:0005980	glycogen catabolic process	16	1	0.16	1166	0.14788	0.14788	Ppp1ca
GO:0034134	toll-like receptor 2 signaling pathway	16	1	0.16	1167	0.14788	0.14788	Cyba
GO:0015732	prostaglandin transport	16	1	0.16	1168	0.14788	0.14788	Slco3a1
GO:2000651	positive regulation of sodium ion transmembrane transporter activity	16	1	0.16	1169	0.14788	0.14788	Glrx
GO:0099625	ventricular cardiac muscle cell membrane repolarization	16	1	0.16	1170	0.14788	0.14788	Wdr1
GO:0035089	establishment of apical/basal cell polarity	16	1	0.16	1171	0.14788	0.14788	Slc9a3r1
GO:0000722	telomere maintenance via recombination	16	1	0.16	1172	0.14788	0.14788	Rpa2
GO:0006582	melanin metabolic process	16	1	0.16	1173	0.14788	0.14788	Ddt
GO:0048302	regulation of isotype switching to IgG isotypes	16	1	0.16	1174	0.14788	0.14788	Tbx21
GO:0071875	adrenergic receptor signaling pathway	16	1	0.16	1175	0.14788	0.14788	Gnai2
GO:0045953	negative regulation of natural killer cell mediated cytotoxicity	16	1	0.16	1176	0.14788	0.14788	Tap1
GO:2000319	regulation of T-helper 17 cell differentiation	16	1	0.16	1177	0.14788	0.14788	Tbx21
GO:0010038	response to metal ion	206	4	2.05	1179	0.14967	0.14967	Crip1 / Id2 / Lck / Ppp1ca
GO:0097191	extrinsic apoptotic signaling pathway	206	4	2.05	1180	0.14967	0.14967	Bak1 / Lgals3 / Ppp1ca / Pycard
GO:0014015	positive regulation of gliogenesis	69	2	0.69	1182	0.15025	0.15025	Id2 / Vim
GO:0050830	defense response to Gram-positive bacterium	69	2	0.69	1183	0.15025	0.15025	Gbp2 / Pglyrp1
GO:0010822	positive regulation of mitochondrion organization	69	2	0.69	1184	0.15025	0.15025	Bak1 / Pycard
GO:0048872	homeostasis of number of cells	282	5	2.81	1186	0.15031	0.15031	Bak1 / Id2 / Lat / Rac1 / Tmem14c
GO:0006935	chemotaxis	440	14	4.38	77	0.15045	0.00013	Ccl3 / Ccl4 / Ccl5 / Cxcr3 / Cxcr6 / Dapk2 / Ddt / Jaml / Lgals3 / Lsp1 / Rac1 / Rac2 / Rhog / Vasp
GO:0007189	adenylate cyclase-activating G protein-coupled receptor signaling pathway	77	4	0.77	278	0.15047	0.00725	Cxcr3 / Gnai2 / Gng2 / Slc9a3r1
GO:0012501	programmed cell death	1630	32	16.21	74	0.15085	0.00012	Anxa6 / Bak1 / Ccl3 / Ccl5 / Crip1 / Cxcr3 / Dapk2 / Glrx / Gnai2 / Gzma / Gzmb / Ifi27l2a / Lck / Lgals1 / Lgals3 / Lsp1 / Pglyrp1 / Plac8 / Ppp1ca / Prelid1 / Prf1 / Pycard / Serpina3g / Shisa5 / Slc25a5 / Slc9a3r1 / Spn / Sra1 / Srgn / Tmbim6 / Ubb / Ucp2
GO:0032101	regulation of response to external stimulus	605	16	6.02	98	0.15281	0.00034	Ccl3 / Ccl4 / Ccl5 / Cd6 / Ctla2a / Cxcr3 / Cyba / Dapk2 / Ddt / Hopx / Pglyrp1 / Pycard / Rac1 / Rac2 / Spn / Vamp8
GO:0009628	response to abiotic stimulus	779	11	7.75	1187	0.15305	0.15305	Bak1 / Cnn2 / Crip1 / Id2 / Lck / Plac8 / Ppp1ca / Rac1 / Tmbim6 / Ube2a / Ucp2
GO:0032880	regulation of protein localization	866	12	8.61	1188	0.15358	0.15358	Abhd17a / Ccl3 / Ccl5 / Glrx / Lgals3 / Pycard / Rhog / Srgn / Sri / Tmbim6 / Ucp2 / Vamp8
GO:0072678	T cell migration	48	4	0.48	148	0.15366	0.0013	Ccl5 / Cxcr3 / Pycard / Spn
GO:0002218	activation of innate immune response	136	3	1.35	1189	0.1537	0.1537	Cyba / Irf7 / Pycard
GO:0022904	respiratory electron transport chain	70	2	0.7	1190	0.15371	0.15371	Cox5b / Uqcrc1
GO:0045576	mast cell activation	56	4	0.56	181	0.15374	0.00231	Cd48 / Lat / Rac2 / Vamp8
GO:0043433	negative regulation of DNA-binding transcription factor activity	137	3	1.36	1191	0.15607	0.15607	Id2 / Pycard / Sri
GO:0035372	protein localization to microtubule	17	1	0.17	1192	0.15637	0.15637	Abhd17a
GO:0034695	response to prostaglandin E	17	1	0.17	1193	0.15637	0.15637	Gng2
GO:0048291	isotype switching to IgG isotypes	17	1	0.17	1194	0.15637	0.15637	Tbx21
GO:0002716	negative regulation of natural killer cell mediated immunity	17	1	0.17	1195	0.15637	0.15637	Tap1
GO:0048268	clathrin coat assembly	17	1	0.17	1196	0.15637	0.15637	Clta
GO:0030220	platelet formation	17	1	0.17	1197	0.15637	0.15637	Wdr1
GO:1901028	regulation of mitochondrial outer membrane permeabilization involved in apoptotic signaling pathway	17	1	0.17	1198	0.15637	0.15637	Slc25a5
GO:0010155	regulation of proton transport	17	1	0.17	1199	0.15637	0.15637	Slc9a3r1
GO:0050860	negative regulation of T cell receptor signaling pathway	17	1	0.17	1200	0.15637	0.15637	Lgals3
GO:0003418	growth plate cartilage chondrocyte differentiation	17	1	0.17	1201	0.15637	0.15637	Anxa6
GO:0048569	post-embryonic animal organ development	17	1	0.17	1202	0.15637	0.15637	Bak1
GO:0010766	negative regulation of sodium ion transport	17	1	0.17	1203	0.15637	0.15637	Slc9a3r1
GO:0000188	inactivation of MAPK activity	17	1	0.17	1204	0.15637	0.15637	Dusp2
GO:0035809	regulation of urine volume	17	1	0.17	1205	0.15637	0.15637	Gnai2
GO:0090201	negative regulation of release of cytochrome c from mitochondria	17	1	0.17	1206	0.15637	0.15637	Prelid1
GO:0002323	natural killer cell activation involved in immune response	17	1	0.17	1207	0.15637	0.15637	Pglyrp1
GO:0099623	regulation of cardiac muscle cell membrane repolarization	17	1	0.17	1208	0.15637	0.15637	Wdr1
GO:2000001	regulation of DNA damage checkpoint	17	1	0.17	1209	0.15637	0.15637	Rpa2
GO:0003071	renal system process involved in regulation of systemic arterial blood pressure	17	1	0.17	1210	0.15637	0.15637	Cyba
GO:0090026	positive regulation of monocyte chemotaxis	17	1	0.17	1211	0.15637	0.15637	Ccl5
GO:0006508	proteolysis	1287	22	12.8	295	0.15714	0.00838	2010111I01Rik / Bak1 / Ctla2a / Ctsd / Ctsw / Derl1 / Eif3f / Gzma / Gzmb / Gzmk / Ifi27l2a / Lck / Prelid1 / Psmb10 / Psmb3 / Psmb9 / Pycard / Serpina3g / Srgn / Tbx21 / Ubb / Ube2a
GO:0045921	positive regulation of exocytosis	71	2	0.71	1212	0.15719	0.15719	Glrx / Vamp8
GO:0002376	immune system process	1950	59	19.4	1	0.15756	2.2e-16	Actg1 / Bak1 / Ccl3 / Ccl4 / Ccl5 / Cd3d / Cd48 / Cd6 / Cd8a / Cd8b1 / Cnn2 / Ctla2a / Cxcr3 / Cxcr6 / Cyba / Dapk2 / Dbnl / Ddt / Gbp2 / Gzmb / H2-K1 / H2-Q6 / H2-Q7 / H2-T22 / Icos / Id2 / Irf7 / Isg20 / Jaml / Lag3 / Lat / Lck / Lgals1 / Lgals3 / Mx1 / Nmi / Pglyrp1 / Prelid1 / Prf1 / Psmb10 / Psmb9 / Pstpip1 / Pycard / Rac1 / Rac2 / Rtp4 / Selplg / Serpina3g / Spn / Tap1 / Tbx21 / Tmbim6 / Tm…
GO:0090087	regulation of peptide transport	614	9	6.11	1213	0.15857	0.15857	Ccl3 / Ccl5 / Glrx / Pycard / Srgn / Sri / Tmbim6 / Ucp2 / Vamp8
GO:0002790	peptide secretion	499	10	4.96	447	0.15902	0.02739	Ccl3 / Ccl5 / Glrx / Pycard / S100a13 / Srgn / Sri / Tmbim6 / Ucp2 / Vamp8
GO:0070201	regulation of establishment of protein localization	615	9	6.12	1214	0.15964	0.15964	Ccl3 / Ccl5 / Glrx / Pycard / Srgn / Sri / Tmbim6 / Ucp2 / Vamp8
GO:0030101	natural killer cell activation	72	2	0.72	1215	0.16069	0.16069	Id2 / Pglyrp1
GO:0002312	B cell activation involved in immune response	72	2	0.72	1216	0.16069	0.16069	Lgals1 / Tbx21
GO:0051149	positive regulation of muscle cell differentiation	72	2	0.72	1217	0.16069	0.16069	Hopx / Tmsb4x
GO:0048871	multicellular organismal homeostasis	368	6	3.66	1218	0.16088	0.16088	Ccl5 / Plac8 / Rac1 / Rac2 / Ubb / Ucp2
GO:1901701	cellular response to oxygen-containing compound	790	11	7.86	1220	0.1634	0.1634	Ccl5 / Cd6 / Gbp2 / Glrx / Gnai2 / Gng2 / H2afz / Pycard / Sri / Ucp2 / Vim
GO:0050778	positive regulation of immune response	511	13	5.08	167	0.16388	0.00177	Cyba / H2-K1 / H2-Q6 / H2-Q7 / H2-T22 / Irf7 / Lag3 / Lck / Lgals3 / Pycard / Tbx21 / Vamp8 / Zbp1
GO:0002521	leukocyte differentiation	486	13	4.83	141	0.16414	0.00113	Bak1 / Ccl3 / Ccl5 / Cd3d / Cd8a / Ctla2a / Id2 / Lck / Lgals1 / Pglyrp1 / Prelid1 / Spn / Tbx21
GO:0014910	regulation of smooth muscle cell migration	73	2	0.73	1221	0.16419	0.16419	Ccl5 / Tmsb4x
GO:0038034	signal transduction in absence of ligand	73	2	0.73	1222	0.16419	0.16419	Bak1 / Ppp1ca
GO:0097192	extrinsic apoptotic signaling pathway in absence of ligand	73	2	0.73	1223	0.16419	0.16419	Bak1 / Ppp1ca
GO:0003012	muscle system process	291	5	2.89	1224	0.16459	0.16459	Anxa6 / Cyba / Lck / Myl6 / Sri
GO:0030336	negative regulation of cell migration	214	4	2.13	1225	0.1647	0.1647	Cnn2 / Csnk2b / Ddt / Slc9a3r1
GO:0007141	male meiosis I	18	1	0.18	1226	0.16477	0.16477	Ubb
GO:1900101	regulation of endoplasmic reticulum unfolded protein response	18	1	0.18	1227	0.16477	0.16477	Bak1
GO:0034694	response to prostaglandin	18	1	0.18	1228	0.16477	0.16477	Gng2
GO:0008053	mitochondrial fusion	18	1	0.18	1229	0.16477	0.16477	Bak1
GO:1902914	regulation of protein polyubiquitination	18	1	0.18	1230	0.16477	0.16477	Nmi
GO:0031571	mitotic G1 DNA damage checkpoint	18	1	0.18	1231	0.16477	0.16477	Rpa2
GO:0031579	membrane raft organization	18	1	0.18	1232	0.16477	0.16477	S100a10
GO:0045117	azole transport	18	1	0.18	1233	0.16477	0.16477	Vamp8
GO:0099170	postsynaptic modulation of chemical synaptic transmission	18	1	0.18	1234	0.16477	0.16477	Csnk2b
GO:0032495	response to muramyl dipeptide	18	1	0.18	1235	0.16477	0.16477	Vim
GO:0050765	negative regulation of phagocytosis	18	1	0.18	1236	0.16477	0.16477	Cnn2
GO:0048532	anatomical structure arrangement	18	1	0.18	1237	0.16477	0.16477	Rac1
GO:0010759	positive regulation of macrophage chemotaxis	18	1	0.18	1238	0.16477	0.16477	Ccl5
GO:0033630	positive regulation of cell adhesion mediated by integrin	18	1	0.18	1239	0.16477	0.16477	Ccl5
GO:1900078	positive regulation of cellular response to insulin stimulus	18	1	0.18	1240	0.16477	0.16477	Gnai2
GO:0001829	trophectodermal cell differentiation	18	1	0.18	1241	0.16477	0.16477	Hopx
GO:0044247	cellular polysaccharide catabolic process	18	1	0.18	1242	0.16477	0.16477	Ppp1ca
GO:0061162	establishment of monopolar cell polarity	18	1	0.18	1243	0.16477	0.16477	Slc9a3r1
GO:0045076	regulation of interleukin-2 biosynthetic process	18	1	0.18	1244	0.16477	0.16477	Lag3
GO:0032823	regulation of natural killer cell differentiation	18	1	0.18	1245	0.16477	0.16477	Pglyrp1
GO:0036344	platelet morphogenesis	18	1	0.18	1246	0.16477	0.16477	Wdr1
GO:0002495	antigen processing and presentation of peptide antigen via MHC class II	18	1	0.18	1247	0.16477	0.16477	Pycard
GO:0044550	secondary metabolite biosynthetic process	18	1	0.18	1248	0.16477	0.16477	Ddt
GO:0051205	protein insertion into membrane	18	1	0.18	1249	0.16477	0.16477	Rtp4
GO:0003081	regulation of systemic arterial blood pressure by renin-angiotensin	18	1	0.18	1250	0.16477	0.16477	Cyba
GO:0043122	regulation of I-kappaB kinase/NF-kappaB signaling	141	3	1.4	1251	0.16566	0.16566	Pycard / S100a13 / S100a4
GO:0034644	cellular response to UV	74	2	0.74	1253	0.16771	0.16771	Bak1 / Crip1
GO:0034766	negative regulation of ion transmembrane transport	74	2	0.74	1254	0.16771	0.16771	Slc9a3r1 / Sri
GO:0002260	lymphocyte homeostasis	74	2	0.74	1255	0.16771	0.16771	Bak1 / Lat
GO:1901888	regulation of cell junction assembly	74	2	0.74	1256	0.16771	0.16771	Rac1 / S100a10
GO:0010977	negative regulation of neuron projection development	142	3	1.41	1258	0.16808	0.16808	H2-K1 / Lgals1 / Vim
GO:0051262	protein tetramerization	142	3	1.41	1259	0.16808	0.16808	Ccl5 / S100a10 / Vasp
GO:2001236	regulation of extrinsic apoptotic signaling pathway	142	3	1.41	1260	0.16808	0.16808	Lgals3 / Ppp1ca / Pycard
GO:0071674	mononuclear cell migration	64	5	0.64	106	0.16917	0.00043	Ccl3 / Ccl4 / Ccl5 / Jaml / Lgals3
GO:0002443	leukocyte mediated immunity	320	16	3.18	17	0.1696	1.2e-07	Cd8a / Gzmb / H2-K1 / H2-Q6 / H2-Q7 / H2-T22 / Irf7 / Lag3 / Lat / Prf1 / Rac2 / Spn / Tap1 / Tbx21 / Vamp8 / Wdr1
GO:0104004	cellular response to environmental stimulus	217	4	2.16	1261	0.17047	0.17047	Bak1 / Cnn2 / Crip1 / Rac1
GO:0071214	cellular response to abiotic stimulus	217	4	2.16	1262	0.17047	0.17047	Bak1 / Cnn2 / Crip1 / Rac1
GO:1903707	negative regulation of hemopoiesis	143	3	1.42	1263	0.17051	0.17051	Id2 / Pglyrp1 / Tbx21
GO:0045069	regulation of viral genome replication	75	2	0.75	1264	0.17125	0.17125	Ccl5 / Isg20
GO:0043367	CD4-positive, alpha-beta T cell differentiation	75	2	0.75	1265	0.17125	0.17125	Spn / Tbx21
GO:0051017	actin filament bundle assembly	144	3	1.43	1267	0.17296	0.17296	Rac1 / S100a10 / Zyx
GO:0072337	modified amino acid transport	19	1	0.19	1268	0.17309	0.17309	Slc9a3r1
GO:0002755	MyD88-dependent toll-like receptor signaling pathway	19	1	0.19	1269	0.17309	0.17309	Irf7
GO:0060252	positive regulation of glial cell proliferation	19	1	0.19	1270	0.17309	0.17309	Vim
GO:2000482	regulation of interleukin-8 secretion	19	1	0.19	1271	0.17309	0.17309	Pycard
GO:0006907	pinocytosis	19	1	0.19	1272	0.17309	0.17309	Pycard
GO:0051654	establishment of mitochondrion localization	19	1	0.19	1273	0.17309	0.17309	Ubb
GO:0002504	antigen processing and presentation of peptide or polysaccharide antigen via MHC class II	19	1	0.19	1274	0.17309	0.17309	Pycard
GO:0018230	peptidyl-L-cysteine S-palmitoylation	19	1	0.19	1275	0.17309	0.17309	Zdhhc18
GO:0018231	peptidyl-S-diacylglycerol-L-cysteine biosynthetic process from peptidyl-cysteine	19	1	0.19	1276	0.17309	0.17309	Zdhhc18
GO:0061339	establishment or maintenance of monopolar cell polarity	19	1	0.19	1277	0.17309	0.17309	Slc9a3r1
GO:0006783	heme biosynthetic process	19	1	0.19	1278	0.17309	0.17309	Tmem14c
GO:0002313	mature B cell differentiation involved in immune response	19	1	0.19	1279	0.17309	0.17309	Lgals1
GO:0045649	regulation of macrophage differentiation	19	1	0.19	1280	0.17309	0.17309	Id2
GO:0044783	G1 DNA damage checkpoint	19	1	0.19	1281	0.17309	0.17309	Rpa2
GO:0099622	cardiac muscle cell membrane repolarization	19	1	0.19	1282	0.17309	0.17309	Wdr1
GO:0044819	mitotic G1/S transition checkpoint	19	1	0.19	1283	0.17309	0.17309	Rpa2
GO:0070168	negative regulation of biomineral tissue development	19	1	0.19	1284	0.17309	0.17309	Srgn
GO:0006026	aminoglycan catabolic process	19	1	0.19	1285	0.17309	0.17309	Pglyrp1
GO:0050909	sensory perception of taste	19	1	0.19	1286	0.17309	0.17309	Rtp4
GO:0031334	positive regulation of protein complex assembly	219	4	2.18	1287	0.17436	0.17436	Pycard / Rac1 / Sub1 / Vasp
GO:0006091	generation of precursor metabolites and energy	297	5	2.95	1288	0.17441	0.17441	Cox5b / Mdh2 / Ppp1ca / Prelid1 / Uqcrc1
GO:0045445	myoblast differentiation	76	2	0.76	1289	0.17479	0.17479	Lgals1 / Sra1
GO:0014066	regulation of phosphatidylinositol 3-kinase signaling	76	2	0.76	1290	0.17479	0.17479	Ccl5 / Slc9a3r1
GO:0022900	electron transport chain	76	2	0.76	1291	0.17479	0.17479	Cox5b / Uqcrc1
GO:0034333	adherens junction assembly	76	2	0.76	1292	0.17479	0.17479	Rac1 / S100a10
GO:0032755	positive regulation of interleukin-6 production	76	2	0.76	1293	0.17479	0.17479	Cyba / Pycard
GO:0051492	regulation of stress fiber assembly	76	2	0.76	1294	0.17479	0.17479	Rac1 / S100a10
GO:0032642	regulation of chemokine production	76	2	0.76	1295	0.17479	0.17479	Ccl5 / Pycard
GO:0001659	temperature homeostasis	145	3	1.44	1296	0.17541	0.17541	Ccl5 / Plac8 / Ucp2
GO:0030098	lymphocyte differentiation	334	11	3.32	115	0.17635	0.00051	Bak1 / Cd3d / Cd8a / Ctla2a / Id2 / Lck / Lgals1 / Pglyrp1 / Prelid1 / Spn / Tbx21
GO:0030029	actin filament-based process	631	15	6.28	159	0.17719	0.00155	Actg1 / Cnn2 / Myl6 / Pstpip1 / Pycard / Rac1 / Rac2 / Rhog / S100a10 / Slc9a3r1 / Sri / Tmsb4x / Vasp / Wdr1 / Zyx
GO:0051674	localization of cell	1250	25	12.43	116	0.17734	0.00057	Anxa6 / Ccl3 / Ccl4 / Ccl5 / Cnn2 / Csnk2b / Cxcr3 / Cxcr6 / Dapk2 / Ddt / Glipr2 / Gnai2 / Jaml / Lgals3 / Pycard / Rac1 / Rac2 / Rhog / Selplg / Slc9a3r1 / Spn / Tbx21 / Tmsb4x / Vim / Wdr1
GO:0048870	cell motility	1250	25	12.43	117	0.17734	0.00057	Anxa6 / Ccl3 / Ccl4 / Ccl5 / Cnn2 / Csnk2b / Cxcr3 / Cxcr6 / Dapk2 / Ddt / Glipr2 / Gnai2 / Jaml / Lgals3 / Pycard / Rac1 / Rac2 / Rhog / Selplg / Slc9a3r1 / Spn / Tbx21 / Tmsb4x / Vim / Wdr1
GO:0043900	regulation of multi-organism process	330	9	3.28	256	0.1792	0.00576	Ccl4 / Ccl5 / Cyba / Isg20 / Lgals1 / Pglyrp1 / Prf1 / Pycard / Spn
GO:0061572	actin filament bundle organization	147	3	1.46	1299	0.18035	0.18035	Rac1 / S100a10 / Zyx
GO:0070242	thymocyte apoptotic process	20	1	0.2	1300	0.18132	0.18132	Bak1
GO:0001911	negative regulation of leukocyte mediated cytotoxicity	20	1	0.2	1301	0.18132	0.18132	Tap1
GO:0010453	regulation of cell fate commitment	20	1	0.2	1302	0.18132	0.18132	Tbx21
GO:0060749	mammary gland alveolus development	20	1	0.2	1303	0.18132	0.18132	Id2
GO:0044346	fibroblast apoptotic process	20	1	0.2	1304	0.18132	0.18132	Bak1
GO:0036010	protein localization to endosome	20	1	0.2	1305	0.18132	0.18132	Abhd17a
GO:0045822	negative regulation of heart contraction	20	1	0.2	1306	0.18132	0.18132	Sri
GO:0061377	mammary gland lobule development	20	1	0.2	1307	0.18132	0.18132	Id2
GO:0090103	cochlea morphogenesis	20	1	0.2	1308	0.18132	0.18132	Rac1
GO:0034114	regulation of heterotypic cell-cell adhesion	20	1	0.2	1309	0.18132	0.18132	Lck
GO:0045063	T-helper 1 cell differentiation	20	1	0.2	1310	0.18132	0.18132	Spn
GO:0045623	negative regulation of T-helper cell differentiation	20	1	0.2	1311	0.18132	0.18132	Tbx21
GO:0000272	polysaccharide catabolic process	20	1	0.2	1312	0.18132	0.18132	Ppp1ca
GO:0042533	tumor necrosis factor biosynthetic process	20	1	0.2	1313	0.18132	0.18132	Spn
GO:0042534	regulation of tumor necrosis factor biosynthetic process	20	1	0.2	1314	0.18132	0.18132	Spn
GO:0042094	interleukin-2 biosynthetic process	20	1	0.2	1315	0.18132	0.18132	Lag3
GO:1903306	negative regulation of regulated secretory pathway	20	1	0.2	1316	0.18132	0.18132	Gnai2
GO:0031100	animal organ regeneration	20	1	0.2	1317	0.18132	0.18132	Csnk2b
GO:0002418	immune response to tumor cell	20	1	0.2	1318	0.18132	0.18132	Prf1
GO:0051220	cytoplasmic sequestering of protein	20	1	0.2	1319	0.18132	0.18132	Sri
GO:2000316	regulation of T-helper 17 type immune response	20	1	0.2	1320	0.18132	0.18132	Tbx21
GO:0006119	oxidative phosphorylation	78	2	0.78	1321	0.18192	0.18192	Cox5b / Uqcrc1
GO:0033077	T cell differentiation in thymus	78	2	0.78	1322	0.18192	0.18192	Cd3d / Spn
GO:0007044	cell-substrate junction assembly	78	2	0.78	1323	0.18192	0.18192	Rac1 / S100a10
GO:0120162	positive regulation of cold-induced thermogenesis	78	2	0.78	1324	0.18192	0.18192	Plac8 / Ucp2
GO:0006950	response to stress	2807	53	27.92	23	0.18344	7.3e-07	Actg1 / Bak1 / Ccl3 / Ccl4 / Ccl5 / Cd6 / Cd8a / Cnn2 / Cotl1 / Crip1 / Ctla2a / Cxcr3 / Cxcr6 / Cyba / Ddt / Derl1 / Gbp2 / Glrx / Gzmb / H2-K1 / H2-Q7 / Hopx / Id2 / Igtp / Irf7 / Isg20 / Jaml / Lag3 / Lat / Lck / Lgals3 / Lsp1 / Mx1 / Nmi / Pglyrp1 / Plac8 / Prf1 / Pstpip1 / Pycard / Rac1 / Rpa2 / Rtp4 / Shisa5 / Spn / Tap1 / Tmbim6 / Trafd1 / Ube2a / Ucp2 / Vamp8 / Vim / Zbp1 / Zyx
GO:0002708	positive regulation of lymphocyte mediated immunity	112	6	1.11	126	0.18522	0.00088	H2-K1 / H2-Q6 / H2-Q7 / H2-T22 / Lag3 / Tbx21
GO:0007229	integrin-mediated signaling pathway	79	2	0.79	1328	0.1855	0.1855	Lat / Zyx
GO:2000146	negative regulation of cell motility	225	4	2.24	1330	0.1862	0.1862	Cnn2 / Csnk2b / Ddt / Slc9a3r1
GO:0046849	bone remodeling	80	2	0.8	1334	0.18909	0.18909	Rac1 / Rac2
GO:0097581	lamellipodium organization	80	2	0.8	1335	0.18909	0.18909	Rac1 / Rac2
GO:0042752	regulation of circadian rhythm	80	2	0.8	1336	0.18909	0.18909	Id2 / Ppp1ca
GO:0008344	adult locomotory behavior	80	2	0.8	1337	0.18909	0.18909	Cnp / Id2
GO:0014909	smooth muscle cell migration	80	2	0.8	1338	0.18909	0.18909	Ccl5 / Tmsb4x
GO:0002520	immune system development	853	17	8.48	236	0.18933	0.00479	Bak1 / Ccl3 / Ccl5 / Cd3d / Cd8a / Cnn2 / Ctla2a / Icos / Id2 / Lck / Lgals1 / Pglyrp1 / Prelid1 / Spn / Tbx21 / Tmem14c / Wdr1
GO:0060261	positive regulation of transcription initiation from RNA polymerase II promoter	21	1	0.21	1340	0.18948	0.18948	Sub1
GO:0032925	regulation of activin receptor signaling pathway	21	1	0.21	1341	0.18948	0.18948	Csnk2b
GO:1901020	negative regulation of calcium ion transmembrane transporter activity	21	1	0.21	1342	0.18948	0.18948	Sri
GO:0051023	regulation of immunoglobulin secretion	21	1	0.21	1343	0.18948	0.18948	Tmbim6
GO:0009187	cyclic nucleotide metabolic process	21	1	0.21	1344	0.18948	0.18948	Cnp
GO:0051354	negative regulation of oxidoreductase activity	21	1	0.21	1345	0.18948	0.18948	Gzma
GO:1905523	positive regulation of macrophage migration	21	1	0.21	1346	0.18948	0.18948	Ccl5
GO:0043951	negative regulation of cAMP-mediated signaling	21	1	0.21	1347	0.18948	0.18948	Gnai2
GO:0071218	cellular response to misfolded protein	21	1	0.21	1348	0.18948	0.18948	Derl1
GO:0010043	response to zinc ion	21	1	0.21	1349	0.18948	0.18948	Crip1
GO:0060333	interferon-gamma-mediated signaling pathway	21	1	0.21	1350	0.18948	0.18948	Nmi
GO:0071870	cellular response to catecholamine stimulus	21	1	0.21	1351	0.18948	0.18948	Gng2
GO:0098581	detection of external biotic stimulus	21	1	0.21	1352	0.18948	0.18948	Pglyrp1
GO:0006814	sodium ion transport	151	3	1.5	1354	0.19034	0.19034	Fxyd5 / Glrx / Slc9a3r1
GO:0097435	supramolecular fiber organization	580	12	5.77	337	0.19164	0.01303	Actg1 / Pstpip1 / Pycard / Rac1 / Rac2 / Rhog / S100a10 / Tmsb4x / Vasp / Vim / Wdr1 / Zyx
GO:0090277	positive regulation of peptide hormone secretion	81	2	0.81	1356	0.19269	0.19269	Glrx / Sri
GO:0015696	ammonium transport	81	2	0.81	1357	0.19269	0.19269	Lgals3 / Vamp8
GO:0045766	positive regulation of angiogenesis	152	3	1.51	1358	0.19286	0.19286	Ccl5 / Cxcr3 / Lgals3
GO:0044057	regulation of system process	411	8	4.09	607	0.19443	0.05299	Anxa6 / Cyba / Gnai2 / Hopx / Lck / Slc9a3r1 / Sri / Vamp8
GO:0007623	circadian rhythm	153	3	1.52	1359	0.19539	0.19539	Id2 / Ppp1ca / Prf1
GO:0051129	negative regulation of cellular component organization	647	9	6.44	1360	0.19564	0.19564	Cnn2 / H2-K1 / Lgals1 / Lgals3 / Pmepa1 / Prelid1 / Slc25a5 / Tmsb4x / Vim
GO:0021782	glial cell development	82	2	0.82	1361	0.1963	0.1963	Id2 / Vim
GO:2000177	regulation of neural precursor cell proliferation	82	2	0.82	1362	0.1963	0.1963	Gnai2 / Id2
GO:0006497	protein lipidation	82	2	0.82	1363	0.1963	0.1963	Abhd17a / Zdhhc18
GO:0030097	hemopoiesis	769	16	7.65	223	0.19639	0.00411	Bak1 / Ccl3 / Ccl5 / Cd3d / Cd8a / Cnn2 / Ctla2a / Id2 / Lck / Lgals1 / Pglyrp1 / Prelid1 / Spn / Tbx21 / Tmem14c / Wdr1
GO:0030001	metal ion transport	605	14	6.02	203	0.19672	0.00283	Anxa6 / Bak1 / Ccl4 / Ccl5 / Cxcr3 / Cyba / Fxyd5 / Glrx / Gnai2 / Lck / Lgals3 / Slc9a3r1 / Sri / Tmbim6
GO:0002719	negative regulation of cytokine production involved in immune response	22	1	0.22	1365	0.19755	0.19755	Tbx21
GO:1902307	positive regulation of sodium ion transmembrane transport	22	1	0.22	1366	0.19755	0.19755	Glrx
GO:2000178	negative regulation of neural precursor cell proliferation	22	1	0.22	1367	0.19755	0.19755	Id2
GO:0050858	negative regulation of antigen receptor-mediated signaling pathway	22	1	0.22	1368	0.19755	0.19755	Lgals3
GO:0050832	defense response to fungus	22	1	0.22	1369	0.19755	0.19755	Cotl1
GO:0035743	CD4-positive, alpha-beta T cell cytokine production	22	1	0.22	1370	0.19755	0.19755	Tbx21
GO:0044117	growth of symbiont in host	22	1	0.22	1371	0.19755	0.19755	Pglyrp1
GO:0033005	positive regulation of mast cell activation	22	1	0.22	1372	0.19755	0.19755	Vamp8
GO:0032727	positive regulation of interferon-alpha production	22	1	0.22	1373	0.19755	0.19755	Irf7
GO:0002347	response to tumor cell	22	1	0.22	1374	0.19755	0.19755	Prf1
GO:0072606	interleukin-8 secretion	22	1	0.22	1375	0.19755	0.19755	Pycard
GO:0032528	microvillus organization	22	1	0.22	1376	0.19755	0.19755	Slc9a3r1
GO:0032515	negative regulation of phosphoprotein phosphatase activity	22	1	0.22	1377	0.19755	0.19755	Gnai2
GO:0071709	membrane assembly	22	1	0.22	1378	0.19755	0.19755	S100a10
GO:0071868	cellular response to monoamine stimulus	22	1	0.22	1379	0.19755	0.19755	Gng2
GO:0071869	response to catecholamine	22	1	0.22	1380	0.19755	0.19755	Gng2
GO:0071800	podosome assembly	22	1	0.22	1381	0.19755	0.19755	Dbnl
GO:1905475	regulation of protein localization to membrane	154	3	1.53	1383	0.19793	0.19793	Lgals3 / Rhog / Vamp8
GO:0048771	tissue remodeling	154	3	1.53	1384	0.19793	0.19793	Bak1 / Rac1 / Rac2
GO:0002262	myeloid cell homeostasis	154	3	1.53	1385	0.19793	0.19793	Bak1 / Id2 / Tmem14c
GO:0048002	antigen processing and presentation of peptide antigen	49	6	0.49	45	0.19946	8.6e-06	H2-K1 / H2-Q6 / H2-Q7 / H2-T22 / Pycard / Tap1
GO:0034446	substrate adhesion-dependent cell spreading	83	2	0.83	1387	0.19992	0.19992	Rac1 / S100a10
GO:0040012	regulation of locomotion	835	17	8.31	219	0.20128	0.00387	Ccl4 / Ccl5 / Cnn2 / Csnk2b / Cxcr3 / Dapk2 / Ddt / Glipr2 / Gnai2 / Lgals3 / Pycard / Rac1 / Rac2 / Slc9a3r1 / Spn / Tmsb4x / Vim
GO:0015672	monovalent inorganic cation transport	313	5	3.11	1388	0.20163	0.20163	Atp6v1f / Cox5b / Fxyd5 / Glrx / Slc9a3r1
GO:0071622	regulation of granulocyte chemotaxis	45	4	0.45	135	0.20198	0.00102	Ccl5 / Dapk2 / Rac1 / Rac2
GO:0002821	positive regulation of adaptive immune response	117	6	1.16	138	0.20279	0.0011	H2-K1 / H2-Q6 / H2-Q7 / H2-T22 / Pycard / Tbx21
GO:0070233	negative regulation of T cell apoptotic process	23	1	0.23	1389	0.20554	0.20554	Ccl5
GO:0010962	regulation of glucan biosynthetic process	23	1	0.23	1390	0.20554	0.20554	Ppp1ca
GO:1903206	negative regulation of hydrogen peroxide-induced cell death	23	1	0.23	1391	0.20554	0.20554	Glrx
GO:0002861	regulation of inflammatory response to antigenic stimulus	23	1	0.23	1392	0.20554	0.20554	Spn
GO:1901032	negative regulation of response to reactive oxygen species	23	1	0.23	1393	0.20554	0.20554	Glrx
GO:0043552	positive regulation of phosphatidylinositol 3-kinase activity	23	1	0.23	1394	0.20554	0.20554	Rac1
GO:0042104	positive regulation of activated T cell proliferation	23	1	0.23	1395	0.20554	0.20554	Pycard
GO:0002675	positive regulation of acute inflammatory response	23	1	0.23	1396	0.20554	0.20554	Ccl5
GO:2001039	negative regulation of cellular response to drug	23	1	0.23	1397	0.20554	0.20554	Glrx
GO:0003413	chondrocyte differentiation involved in endochondral bone morphogenesis	23	1	0.23	1398	0.20554	0.20554	Anxa6
GO:0000303	response to superoxide	23	1	0.23	1399	0.20554	0.20554	Ucp2
GO:0044110	growth involved in symbiotic interaction	23	1	0.23	1400	0.20554	0.20554	Pglyrp1
GO:0044116	growth of symbiont involved in interaction with host	23	1	0.23	1401	0.20554	0.20554	Pglyrp1
GO:0031342	negative regulation of cell killing	23	1	0.23	1402	0.20554	0.20554	Tap1
GO:0005979	regulation of glycogen biosynthetic process	23	1	0.23	1403	0.20554	0.20554	Ppp1ca
GO:0006779	porphyrin-containing compound biosynthetic process	23	1	0.23	1404	0.20554	0.20554	Tmem14c
GO:0009595	detection of biotic stimulus	23	1	0.23	1405	0.20554	0.20554	Pglyrp1
GO:0043950	positive regulation of cAMP-mediated signaling	23	1	0.23	1406	0.20554	0.20554	Cxcr3
GO:0043371	negative regulation of CD4-positive, alpha-beta T cell differentiation	23	1	0.23	1407	0.20554	0.20554	Tbx21
GO:0045648	positive regulation of erythrocyte differentiation	23	1	0.23	1408	0.20554	0.20554	Id2
GO:0043302	positive regulation of leukocyte degranulation	23	1	0.23	1409	0.20554	0.20554	Vamp8
GO:2000036	regulation of stem cell population maintenance	23	1	0.23	1410	0.20554	0.20554	Zfp706
GO:0071867	response to monoamine	23	1	0.23	1411	0.20554	0.20554	Gng2
GO:0045987	positive regulation of smooth muscle contraction	23	1	0.23	1412	0.20554	0.20554	Lck
GO:0051788	response to misfolded protein	23	1	0.23	1413	0.20554	0.20554	Derl1
GO:0090025	regulation of monocyte chemotaxis	23	1	0.23	1414	0.20554	0.20554	Ccl5
GO:0006915	apoptotic process	1598	31	15.9	84	0.20609	0.00019	Anxa6 / Bak1 / Ccl3 / Ccl5 / Crip1 / Cxcr3 / Dapk2 / Gnai2 / Gzma / Gzmb / Ifi27l2a / Lck / Lgals1 / Lgals3 / Lsp1 / Pglyrp1 / Plac8 / Ppp1ca / Prelid1 / Prf1 / Pycard / Serpina3g / Shisa5 / Slc25a5 / Slc9a3r1 / Spn / Sra1 / Srgn / Tmbim6 / Ubb / Ucp2
GO:0042158	lipoprotein biosynthetic process	85	2	0.85	1415	0.20718	0.20718	Abhd17a / Zdhhc18
GO:0051651	maintenance of location in cell	85	2	0.85	1416	0.20718	0.20718	Srgn / Tmsb4x
GO:0045785	positive regulation of cell adhesion	355	9	3.53	306	0.20797	0.0091	Ccl5 / Cd6 / Icos / Lck / Lgals1 / Pycard / Rac1 / S100a10 / Spn
GO:0070838	divalent metal ion transport	354	11	3.52	123	0.20811	0.00082	Anxa6 / Bak1 / Ccl4 / Ccl5 / Cxcr3 / Cyba / Gnai2 / Lck / Lgals3 / Sri / Tmbim6
GO:0003015	heart process	158	3	1.57	1417	0.20815	0.20815	Gnai2 / Hopx / Sri
GO:0007159	leukocyte cell-cell adhesion	282	12	2.81	57	0.20953	2.5e-05	Ccl5 / Cd6 / Icos / Lag3 / Lck / Lgals1 / Lgals3 / Pycard / Rac2 / Selplg / Spn / Tbx21
GO:0050679	positive regulation of epithelial cell proliferation	159	3	1.58	1418	0.21073	0.21073	Ccl5 / Cyba / Jaml
GO:1905477	positive regulation of protein localization to membrane	86	2	0.86	1419	0.21082	0.21082	Lgals3 / Rhog
GO:0071482	cellular response to light stimulus	86	2	0.86	1420	0.21082	0.21082	Bak1 / Crip1
GO:0030048	actin filament-based movement	86	2	0.86	1421	0.21082	0.21082	Myl6 / Sri
GO:0007167	enzyme linked receptor protein signaling pathway	682	11	6.78	751	0.21151	0.07787	Csnk2b / Glrx / Gnai2 / Lat / Lck / Pmepa1 / Rac1 / Slc9a3r1 / Sub1 / Vim / Zyx
GO:0043254	regulation of protein complex assembly	402	6	4	1422	0.21161	0.21161	Pmepa1 / Pycard / Rac1 / Sub1 / Tmsb4x / Vasp
GO:0072511	divalent inorganic cation transport	356	11	3.54	125	0.21209	0.00086	Anxa6 / Bak1 / Ccl4 / Ccl5 / Cxcr3 / Cyba / Gnai2 / Lck / Lgals3 / Sri / Tmbim6
GO:0001990	regulation of systemic arterial blood pressure by hormone	24	1	0.24	1424	0.21346	0.21346	Cyba
GO:0051560	mitochondrial calcium ion homeostasis	24	1	0.24	1425	0.21346	0.21346	Anxa6
GO:0006925	inflammatory cell apoptotic process	24	1	0.24	1426	0.21346	0.21346	Ccl5
GO:0015991	ATP hydrolysis coupled proton transport	24	1	0.24	1427	0.21346	0.21346	Atp6v1f
GO:0042119	neutrophil activation	24	1	0.24	1428	0.21346	0.21346	Ccl5
GO:0048566	embryonic digestive tract development	24	1	0.24	1429	0.21346	0.21346	Id2
GO:0000305	response to oxygen radical	24	1	0.24	1430	0.21346	0.21346	Ucp2
GO:0050849	negative regulation of calcium-mediated signaling	24	1	0.24	1431	0.21346	0.21346	Sri
GO:0006298	mismatch repair	24	1	0.24	1432	0.21346	0.21346	Rpa2
GO:0033014	tetrapyrrole biosynthetic process	24	1	0.24	1433	0.21346	0.21346	Tmem14c
GO:0034123	positive regulation of toll-like receptor signaling pathway	24	1	0.24	1434	0.21346	0.21346	Cyba
GO:0045686	negative regulation of glial cell differentiation	24	1	0.24	1435	0.21346	0.21346	Id2
GO:0002335	mature B cell differentiation	24	1	0.24	1436	0.21346	0.21346	Lgals1
GO:1903429	regulation of cell maturation	24	1	0.24	1437	0.21346	0.21346	Rac1
GO:1901798	positive regulation of signal transduction by p53 class mediator	24	1	0.24	1438	0.21346	0.21346	Ubb
GO:0060306	regulation of membrane repolarization	24	1	0.24	1439	0.21346	0.21346	Wdr1
GO:0071542	dopaminergic neuron differentiation	24	1	0.24	1440	0.21346	0.21346	Rac1
GO:0072348	sulfur compound transport	24	1	0.24	1441	0.21346	0.21346	Slc9a3r1
GO:0110020	regulation of actomyosin structure organization	87	2	0.87	1442	0.21446	0.21446	Rac1 / S100a10
GO:0032989	cellular component morphogenesis	936	17	9.31	328	0.21756	0.01163	Actg1 / Ccl3 / Cnp / Dbnl / Id2 / Myl12a / Psmb10 / Rac1 / Rac2 / Rhog / S100a10 / S100a13 / Slc9a3r1 / Ubb / Vasp / Vim / Wdr1
GO:0042089	cytokine biosynthetic process	103	4	1.02	390	0.21757	0.01945	Irf7 / Lag3 / Nmi / Spn
GO:0120032	regulation of plasma membrane bounded cell projection assembly	162	3	1.61	1445	0.21849	0.21849	Rac1 / Rac2 / Rhog
GO:0070232	regulation of T cell apoptotic process	40	3	0.4	279	0.21877	0.00728	Ccl5 / Lgals3 / Prelid1
GO:0042113	B cell activation	241	4	2.4	1446	0.21897	0.21897	Bak1 / Id2 / Lgals1 / Tbx21
GO:0016192	vesicle-mediated transport	1177	17	11.71	715	0.22091	0.07629	Actg1 / Ccl5 / Clta / Cnn2 / Cyba / Dbnl / Glrx / Gnai2 / Lat / Lgals3 / Pstpip1 / Pycard / Rac1 / Rac2 / S100a10 / Sys1 / Vamp8
GO:0006312	mitotic recombination	25	1	0.25	1447	0.2213	0.2213	Rpa2
GO:0015988	energy coupled proton transmembrane transport, against electrochemical gradient	25	1	0.25	1448	0.2213	0.2213	Atp6v1f
GO:0033522	histone H2A ubiquitination	25	1	0.25	1449	0.2213	0.2213	Ube2a
GO:2000778	positive regulation of interleukin-6 secretion	25	1	0.25	1450	0.2213	0.2213	Pycard
GO:1902235	regulation of endoplasmic reticulum stress-induced intrinsic apoptotic signaling pathway	25	1	0.25	1451	0.2213	0.2213	Tmbim6
GO:0001783	B cell apoptotic process	25	1	0.25	1452	0.2213	0.2213	Bak1
GO:0010803	regulation of tumor necrosis factor-mediated signaling pathway	25	1	0.25	1453	0.2213	0.2213	Pycard
GO:0006734	NADH metabolic process	25	1	0.25	1454	0.2213	0.2213	Mdh2
GO:0045662	negative regulation of myoblast differentiation	25	1	0.25	1455	0.2213	0.2213	Sra1
GO:0070306	lens fiber cell differentiation	25	1	0.25	1456	0.2213	0.2213	Vim
GO:0055083	monovalent inorganic anion homeostasis	25	1	0.25	1457	0.2213	0.2213	Slc9a3r1
GO:0043114	regulation of vascular permeability	25	1	0.25	1458	0.2213	0.2213	Ccl4
GO:0044058	regulation of digestive system process	25	1	0.25	1459	0.2213	0.2213	Vamp8
GO:0090075	relaxation of muscle	25	1	0.25	1460	0.2213	0.2213	Sri
GO:0043933	protein-containing complex subunit organization	1672	20	16.63	1461	0.22172	0.22172	Anxa6 / Ccl5 / Cd3d / Clta / Cyba / Dbnl / Derl1 / Hopx / Mx1 / Pmepa1 / Prf1 / Pstpip1 / Pycard / Rac1 / S100a10 / Sub1 / Tmsb4x / Vamp8 / Vasp / Wdr1
GO:0010927	cellular component assembly involved in morphogenesis	89	2	0.89	1462	0.22178	0.22178	Actg1 / Wdr1
GO:0000018	regulation of DNA recombination	89	2	0.89	1463	0.22178	0.22178	Rpa2 / Tbx21
GO:0002224	toll-like receptor signaling pathway	89	2	0.89	1464	0.22178	0.22178	Cyba / Irf7
GO:0060491	regulation of cell projection assembly	164	3	1.63	1468	0.2237	0.2237	Rac1 / Rac2 / Rhog
GO:0000902	cell morphogenesis	850	16	8.45	315	0.2247	0.01041	Ccl3 / Cnp / Dbnl / Id2 / Myl12a / Psmb10 / Rac1 / Rac2 / Rhog / S100a10 / S100a13 / Slc9a3r1 / Ubb / Vasp / Vim / Wdr1
GO:0032231	regulation of actin filament bundle assembly	90	2	0.9	1469	0.22544	0.22544	Rac1 / S100a10
GO:0006612	protein targeting to membrane	90	2	0.9	1470	0.22544	0.22544	Rtp4 / Zdhhc18
GO:0007160	cell-matrix adhesion	166	3	1.65	1472	0.22894	0.22894	Rac1 / S100a10 / Zyx
GO:0034067	protein localization to Golgi apparatus	26	1	0.26	1473	0.22905	0.22905	Sys1
GO:0086065	cell communication involved in cardiac conduction	26	1	0.26	1474	0.22905	0.22905	Sri
GO:0099131	ATP hydrolysis coupled ion transmembrane transport	26	1	0.26	1475	0.22905	0.22905	Atp6v1f
GO:0099132	ATP hydrolysis coupled cation transmembrane transport	26	1	0.26	1476	0.22905	0.22905	Atp6v1f
GO:0042168	heme metabolic process	26	1	0.26	1477	0.22905	0.22905	Tmem14c
GO:0046639	negative regulation of alpha-beta T cell differentiation	26	1	0.26	1478	0.22905	0.22905	Tbx21
GO:0002507	tolerance induction	26	1	0.26	1479	0.22905	0.22905	Icos
GO:0014002	astrocyte development	26	1	0.26	1480	0.22905	0.22905	Vim
GO:0014003	oligodendrocyte development	26	1	0.26	1481	0.22905	0.22905	Id2
GO:1903513	endoplasmic reticulum to cytosol transport	26	1	0.26	1482	0.22905	0.22905	Derl1
GO:0035774	positive regulation of insulin secretion involved in cellular response to glucose stimulus	26	1	0.26	1483	0.22905	0.22905	Sri
GO:0045830	positive regulation of isotype switching	26	1	0.26	1484	0.22905	0.22905	Tbx21
GO:1900027	regulation of ruffle assembly	26	1	0.26	1485	0.22905	0.22905	Rhog
GO:0090218	positive regulation of lipid kinase activity	26	1	0.26	1486	0.22905	0.22905	Rac1
GO:0072539	T-helper 17 cell differentiation	26	1	0.26	1487	0.22905	0.22905	Tbx21
GO:0070979	protein K11-linked ubiquitination	26	1	0.26	1488	0.22905	0.22905	Ube2a
GO:0097345	mitochondrial outer membrane permeabilization	26	1	0.26	1489	0.22905	0.22905	Slc25a5
GO:0031116	positive regulation of microtubule polymerization	26	1	0.26	1490	0.22905	0.22905	Rac1
GO:0043457	regulation of cellular respiration	26	1	0.26	1491	0.22905	0.22905	Prelid1
GO:0006515	protein quality control for misfolded or incompletely synthesized proteins	26	1	0.26	1492	0.22905	0.22905	Derl1
GO:0006099	tricarboxylic acid cycle	26	1	0.26	1493	0.22905	0.22905	Mdh2
GO:0030970	retrograde protein transport, ER to cytosol	26	1	0.26	1494	0.22905	0.22905	Derl1
GO:0090662	ATP hydrolysis coupled transmembrane transport	26	1	0.26	1495	0.22905	0.22905	Atp6v1f
GO:0045920	negative regulation of exocytosis	26	1	0.26	1496	0.22905	0.22905	Gnai2
GO:0007127	meiosis I	91	2	0.91	1497	0.22911	0.22911	Rpa2 / Ubb
GO:0014812	muscle cell migration	91	2	0.91	1498	0.22911	0.22911	Ccl5 / Tmsb4x
GO:1901654	response to ketone	91	2	0.91	1499	0.22911	0.22911	Csnk2b / Gng2
GO:0007565	female pregnancy	91	2	0.91	1500	0.22911	0.22911	H2-Q7 / Ube2a
GO:0019079	viral genome replication	91	2	0.91	1501	0.22911	0.22911	Ccl5 / Isg20
GO:0035710	CD4-positive, alpha-beta T cell activation	91	2	0.91	1502	0.22911	0.22911	Spn / Tbx21
GO:1904018	positive regulation of vasculature development	167	3	1.66	1503	0.23156	0.23156	Ccl5 / Cxcr3 / Lgals3
GO:0035690	cellular response to drug	247	4	2.46	1504	0.23164	0.23164	Ccl4 / Glrx / Gnai2 / Vim
GO:0008015	blood circulation	330	5	3.28	1505	0.23202	0.23202	Ccl4 / Cyba / Hopx / Id2 / Sri
GO:0042107	cytokine metabolic process	107	4	1.06	418	0.23203	0.02203	Irf7 / Lag3 / Nmi / Spn
GO:0045765	regulation of angiogenesis	248	4	2.47	1506	0.23377	0.23377	Ccl5 / Cxcr3 / Lgals3 / Rnh1
GO:0098542	defense response to other organism	381	16	3.79	26	0.23382	1.2e-06	Ccl5 / Cd8a / Cotl1 / Cyba / Gbp2 / H2-K1 / Irf7 / Isg20 / Mx1 / Pglyrp1 / Plac8 / Prf1 / Pycard / Rtp4 / Spn / Zbp1
GO:0007249	I-kappaB kinase/NF-kappaB signaling	168	3	1.67	1507	0.2342	0.2342	Pycard / S100a13 / S100a4
GO:0050707	regulation of cytokine secretion	168	3	1.67	1508	0.2342	0.2342	Ccl3 / Pycard / Srgn
GO:0051224	negative regulation of protein transport	168	3	1.67	1509	0.2342	0.2342	Srgn / Tmbim6 / Ucp2
GO:0071887	leukocyte apoptotic process	109	4	1.08	424	0.23568	0.02339	Bak1 / Ccl5 / Lgals3 / Prelid1
GO:0031343	positive regulation of cell killing	72	7	0.72	42	0.23606	7.1e-06	H2-K1 / H2-Q6 / H2-Q7 / H2-T22 / Lag3 / Pglyrp1 / Prf1
GO:2000379	positive regulation of reactive oxygen species metabolic process	93	2	0.93	1510	0.23645	0.23645	Cyba / Gnai2
GO:0002724	regulation of T cell cytokine production	27	1	0.27	1511	0.23674	0.23674	Tbx21
GO:0060260	regulation of transcription initiation from RNA polymerase II promoter	27	1	0.27	1512	0.23674	0.23674	Sub1
GO:0032967	positive regulation of collagen biosynthetic process	27	1	0.27	1513	0.23674	0.23674	Vim
GO:0046596	regulation of viral entry into host cell	27	1	0.27	1514	0.23674	0.23674	Lgals1
GO:0006953	acute-phase response	27	1	0.27	1515	0.23674	0.23674	Ccl5
GO:0043537	negative regulation of blood vessel endothelial cell migration	27	1	0.27	1516	0.23674	0.23674	Csnk2b
GO:0003417	growth plate cartilage development	27	1	0.27	1517	0.23674	0.23674	Anxa6
GO:0048535	lymph node development	27	1	0.27	1518	0.23674	0.23674	Id2
GO:0007097	nuclear migration	27	1	0.27	1519	0.23674	0.23674	Slc9a3r1
GO:0051932	synaptic transmission, GABAergic	27	1	0.27	1520	0.23674	0.23674	Rac1
GO:0043403	skeletal muscle tissue regeneration	27	1	0.27	1521	0.23674	0.23674	Hopx
GO:0048305	immunoglobulin secretion	27	1	0.27	1522	0.23674	0.23674	Tmbim6
GO:0033137	negative regulation of peptidyl-serine phosphorylation	27	1	0.27	1523	0.23674	0.23674	Bak1
GO:0031349	positive regulation of defense response	296	10	2.94	121	0.23892	0.00076	Ccl3 / Ccl5 / Cd6 / Cyba / Ddt / Irf7 / Lag3 / Pycard / Vamp8 / Zbp1
GO:0002253	activation of immune response	334	5	3.32	1525	0.23936	0.23936	Cyba / Irf7 / Lck / Lgals3 / Pycard
GO:0031345	negative regulation of cell projection organization	170	3	1.69	1526	0.23948	0.23948	H2-K1 / Lgals1 / Vim
GO:0120034	positive regulation of plasma membrane bounded cell projection assembly	94	2	0.94	1527	0.24013	0.24013	Rac1 / Rac2
GO:0043123	positive regulation of I-kappaB kinase/NF-kappaB signaling	94	2	0.94	1528	0.24013	0.24013	S100a13 / S100a4
GO:0048534	hematopoietic or lymphoid organ development	805	16	8.01	267	0.242	0.00634	Bak1 / Ccl3 / Ccl5 / Cd3d / Cd8a / Cnn2 / Ctla2a / Id2 / Lck / Lgals1 / Pglyrp1 / Prelid1 / Spn / Tbx21 / Tmem14c / Wdr1
GO:0051271	negative regulation of cellular component movement	252	4	2.51	1529	0.24234	0.24234	Cnn2 / Csnk2b / Ddt / Slc9a3r1
GO:0051924	regulation of calcium ion transport	207	9	2.06	86	0.24343	0.00023	Bak1 / Ccl4 / Ccl5 / Cxcr3 / Cyba / Gnai2 / Lgals3 / Sri / Tmbim6
GO:1902105	regulation of leukocyte differentiation	262	8	2.61	234	0.24379	0.0047	Ccl3 / Ccl5 / Ctla2a / Id2 / Lck / Pglyrp1 / Prelid1 / Tbx21
GO:0061982	meiosis I cell cycle process	95	2	0.94	1531	0.24381	0.24381	Rpa2 / Ubb
GO:2000045	regulation of G1/S transition of mitotic cell cycle	95	2	0.94	1532	0.24381	0.24381	Id2 / Rpa2
GO:0043467	regulation of generation of precursor metabolites and energy	95	2	0.94	1533	0.24381	0.24381	Ppp1ca / Prelid1
GO:0016999	antibiotic metabolic process	95	2	0.94	1534	0.24381	0.24381	Cyba / Mdh2
GO:0048812	neuron projection morphogenesis	509	7	5.06	1536	0.24382	0.24382	Cnp / Dbnl / Rac1 / Rac2 / Ubb / Vasp / Vim
GO:1900117	regulation of execution phase of apoptosis	28	1	0.28	1537	0.24434	0.24434	Cxcr3
GO:0070873	regulation of glycogen metabolic process	28	1	0.28	1538	0.24434	0.24434	Ppp1ca
GO:0017004	cytochrome complex assembly	28	1	0.28	1539	0.24434	0.24434	Cyba
GO:0006308	DNA catabolic process	28	1	0.28	1540	0.24434	0.24434	Isg20
GO:0046039	GTP metabolic process	28	1	0.28	1541	0.24434	0.24434	Gimap7
GO:0071398	cellular response to fatty acid	28	1	0.28	1542	0.24434	0.24434	Gng2
GO:1902253	regulation of intrinsic apoptotic signaling pathway by p53 class mediator	28	1	0.28	1543	0.24434	0.24434	Ubb
GO:0090162	establishment of epithelial cell polarity	28	1	0.28	1544	0.24434	0.24434	Slc9a3r1
GO:0044275	cellular carbohydrate catabolic process	28	1	0.28	1545	0.24434	0.24434	Ppp1ca
GO:0031112	positive regulation of microtubule polymerization or depolymerization	28	1	0.28	1546	0.24434	0.24434	Rac1
GO:0051150	regulation of smooth muscle cell differentiation	28	1	0.28	1547	0.24434	0.24434	Tmsb4x
GO:0055078	sodium ion homeostasis	28	1	0.28	1548	0.24434	0.24434	Gnai2
GO:1903170	negative regulation of calcium ion transmembrane transport	28	1	0.28	1549	0.24434	0.24434	Sri
GO:0033119	negative regulation of RNA splicing	28	1	0.28	1550	0.24434	0.24434	Tmbim6
GO:0045932	negative regulation of muscle contraction	28	1	0.28	1551	0.24434	0.24434	Sri
GO:0003044	regulation of systemic arterial blood pressure mediated by a chemical signal	28	1	0.28	1552	0.24434	0.24434	Cyba
GO:1904950	negative regulation of establishment of protein localization	172	3	1.71	1553	0.24478	0.24478	Srgn / Tmbim6 / Ucp2
GO:0034329	cell junction assembly	173	3	1.72	1556	0.24744	0.24744	Rac1 / S100a10 / Wdr1
GO:0099175	regulation of postsynapse organization	96	2	0.95	1557	0.2475	0.2475	Abhd17a / Srgn
GO:0098732	macromolecule deacylation	96	2	0.95	1558	0.2475	0.2475	Abhd17a / Hopx
GO:0035601	protein deacylation	96	2	0.95	1559	0.2475	0.2475	Abhd17a / Hopx
GO:0030316	osteoclast differentiation	96	2	0.95	1560	0.2475	0.2475	Ccl3 / Ccl5
GO:1902533	positive regulation of intracellular signal transduction	813	15	8.09	354	0.24982	0.01535	Ccl3 / Ccl4 / Ccl5 / Cd8a / Cxcr3 / Ddt / Glipr2 / Glrx / Gnai2 / Lck / Pycard / S100a13 / S100a4 / Slc9a3r1 / Ubb
GO:0052548	regulation of endopeptidase activity	258	7	2.57	347	0.25014	0.01469	Bak1 / Ifi27l2a / Lck / Prelid1 / Psmb9 / Pycard / Serpina3g
GO:0034763	negative regulation of transmembrane transport	97	2	0.96	1562	0.25118	0.25118	Slc9a3r1 / Sri
GO:0032649	regulation of interferon-gamma production	97	2	0.96	1563	0.25118	0.25118	Pglyrp1 / Pycard
GO:0086004	regulation of cardiac muscle cell contraction	29	1	0.29	1565	0.25187	0.25187	Sri
GO:2000144	positive regulation of DNA-templated transcription, initiation	29	1	0.29	1566	0.25187	0.25187	Sub1
GO:1902110	positive regulation of mitochondrial membrane permeability involved in apoptotic process	29	1	0.29	1567	0.25187	0.25187	Slc25a5
GO:0060561	apoptotic process involved in morphogenesis	29	1	0.29	1568	0.25187	0.25187	Bak1
GO:1905898	positive regulation of response to endoplasmic reticulum stress	29	1	0.29	1569	0.25187	0.25187	Bak1
GO:1901385	regulation of voltage-gated calcium channel activity	29	1	0.29	1570	0.25187	0.25187	Sri
GO:0090279	regulation of calcium ion import	29	1	0.29	1571	0.25187	0.25187	Lgals3
GO:0072538	T-helper 17 type immune response	29	1	0.29	1572	0.25187	0.25187	Tbx21
GO:0071242	cellular response to ammonium ion	29	1	0.29	1573	0.25187	0.25187	Gnai2
GO:0097352	autophagosome maturation	29	1	0.29	1574	0.25187	0.25187	Vamp8
GO:0032689	negative regulation of interferon-gamma production	29	1	0.29	1575	0.25187	0.25187	Pglyrp1
GO:0044091	membrane biogenesis	29	1	0.29	1576	0.25187	0.25187	S100a10
GO:0043243	positive regulation of protein complex disassembly	29	1	0.29	1577	0.25187	0.25187	Wdr1
GO:0036230	granulocyte activation	29	1	0.29	1578	0.25187	0.25187	Ccl5
GO:0001912	positive regulation of leukocyte mediated cytotoxicity	61	5	0.61	101	0.25357	0.00035	H2-K1 / H2-Q6 / H2-Q7 / H2-T22 / Lag3
GO:0019941	modification-dependent protein catabolic process	516	7	5.13	1579	0.25436	0.25436	Derl1 / Psmb10 / Psmb3 / Psmb9 / Tbx21 / Ubb / Ube2a
GO:0097529	myeloid leukocyte migration	171	10	1.7	43	0.25442	8e-06	Ccl3 / Ccl4 / Ccl5 / Dapk2 / Ddt / Jaml / Lgals3 / Rac1 / Rac2 / Wdr1
GO:0001952	regulation of cell-matrix adhesion	98	2	0.97	1580	0.25487	0.25487	Rac1 / S100a10
GO:0048284	organelle fusion	98	2	0.97	1581	0.25487	0.25487	Bak1 / Vamp8
GO:0071333	cellular response to glucose stimulus	98	2	0.97	1582	0.25487	0.25487	Sri / Ucp2
GO:0071901	negative regulation of protein serine/threonine kinase activity	98	2	0.97	1583	0.25487	0.25487	Dusp2 / Pycard
GO:0031398	positive regulation of protein ubiquitination	98	2	0.97	1584	0.25487	0.25487	Derl1 / Nmi
GO:0050768	negative regulation of neurogenesis	258	4	2.57	1585	0.25533	0.25533	H2-K1 / Id2 / Lgals1 / Vim
GO:0050673	epithelial cell proliferation	343	5	3.41	1587	0.2561	0.2561	Ccl5 / Cxcr3 / Cyba / Id2 / Jaml
GO:0022409	positive regulation of cell-cell adhesion	211	7	2.1	245	0.25634	0.00517	Ccl5 / Cd6 / Icos / Lck / Lgals1 / Pycard / Spn
GO:0045596	negative regulation of cell differentiation	607	8	6.04	1588	0.25761	0.25761	H2-K1 / Hopx / Id2 / Lgals1 / Pglyrp1 / Sra1 / Tbx21 / Vim
GO:0046660	female sex differentiation	99	2	0.98	1589	0.25856	0.25856	Bak1 / Ubb
GO:0071331	cellular response to hexose stimulus	99	2	0.98	1590	0.25856	0.25856	Sri / Ucp2
GO:0046425	regulation of JAK-STAT cascade	99	2	0.98	1591	0.25856	0.25856	Ccl5 / Lck
GO:0010955	negative regulation of protein processing	30	1	0.3	1592	0.25933	0.25933	Ctla2a
GO:0086009	membrane repolarization	30	1	0.3	1593	0.25933	0.25933	Wdr1
GO:0002828	regulation of type 2 immune response	30	1	0.3	1594	0.25933	0.25933	Tbx21
GO:0048710	regulation of astrocyte differentiation	30	1	0.3	1595	0.25933	0.25933	Id2
GO:0006101	citrate metabolic process	30	1	0.3	1596	0.25933	0.25933	Mdh2
GO:0010714	positive regulation of collagen metabolic process	30	1	0.3	1597	0.25933	0.25933	Vim
GO:0033032	regulation of myeloid cell apoptotic process	30	1	0.3	1598	0.25933	0.25933	Ccl5
GO:0007031	peroxisome organization	30	1	0.3	1599	0.25933	0.25933	Pla2g16
GO:0009593	detection of chemical stimulus	30	1	0.3	1600	0.25933	0.25933	Rtp4
GO:1903318	negative regulation of protein maturation	30	1	0.3	1601	0.25933	0.25933	Ctla2a
GO:0002446	neutrophil mediated immunity	30	1	0.3	1602	0.25933	0.25933	Wdr1
GO:0045954	positive regulation of natural killer cell mediated cytotoxicity	30	1	0.3	1603	0.25933	0.25933	Lag3
GO:2001258	negative regulation of cation channel activity	30	1	0.3	1604	0.25933	0.25933	Sri
GO:0043276	anoikis	30	1	0.3	1605	0.25933	0.25933	Dapk2
GO:0021799	cerebral cortex radially oriented cell migration	30	1	0.3	1606	0.25933	0.25933	Rac1
GO:0007266	Rho protein signal transduction	178	3	1.77	1607	0.26079	0.26079	Rac1 / Rac2 / Rhog
GO:0071326	cellular response to monosaccharide stimulus	100	2	0.99	1609	0.26225	0.26225	Sri / Ucp2
GO:0008219	cell death	1758	32	17.49	109	0.26234	0.00046	Anxa6 / Bak1 / Ccl3 / Ccl5 / Crip1 / Cxcr3 / Dapk2 / Glrx / Gnai2 / Gzma / Gzmb / Ifi27l2a / Lck / Lgals1 / Lgals3 / Lsp1 / Pglyrp1 / Plac8 / Ppp1ca / Prelid1 / Prf1 / Pycard / Serpina3g / Shisa5 / Slc25a5 / Slc9a3r1 / Spn / Sra1 / Srgn / Tmbim6 / Ubb / Ucp2
GO:0002275	myeloid cell activation involved in immune response	70	4	0.7	246	0.26254	0.00518	Lat / Pycard / Rac2 / Vamp8
GO:0000302	response to reactive oxygen species	179	3	1.78	1611	0.26347	0.26347	Glrx / Lck / Ucp2
GO:0120039	plasma membrane bounded cell projection morphogenesis	522	7	5.19	1612	0.2635	0.2635	Cnp / Dbnl / Rac1 / Rac2 / Ubb / Vasp / Vim
GO:0009314	response to radiation	347	5	3.45	1613	0.26363	0.26363	Bak1 / Crip1 / Id2 / Ppp1ca / Ube2a
GO:0043632	modification-dependent macromolecule catabolic process	523	7	5.2	1614	0.26503	0.26503	Derl1 / Psmb10 / Psmb3 / Psmb9 / Tbx21 / Ubb / Ube2a
GO:0001776	leukocyte homeostasis	101	2	1	1616	0.26594	0.26594	Bak1 / Lat
GO:0032092	positive regulation of protein binding	101	2	1	1617	0.26594	0.26594	Derl1 / Lgals3
GO:0030278	regulation of ossification	180	3	1.79	1618	0.26616	0.26616	Clic1 / Id2 / Srgn
GO:0090257	regulation of muscle system process	180	3	1.79	1619	0.26616	0.26616	Anxa6 / Lck / Sri
GO:0040017	positive regulation of locomotion	504	12	5.01	230	0.26653	0.0045	Ccl4 / Ccl5 / Cxcr3 / Dapk2 / Glipr2 / Gnai2 / Lgals3 / Pycard / Rac1 / Rac2 / Spn / Tmsb4x
GO:0007143	female meiotic nuclear division	31	1	0.31	1620	0.26671	0.26671	Ubb
GO:1903205	regulation of hydrogen peroxide-induced cell death	31	1	0.31	1621	0.26671	0.26671	Glrx
GO:0002717	positive regulation of natural killer cell mediated immunity	31	1	0.31	1622	0.26671	0.26671	Lag3
GO:0051647	nucleus localization	31	1	0.31	1623	0.26671	0.26671	Slc9a3r1
GO:0045577	regulation of B cell differentiation	31	1	0.31	1624	0.26671	0.26671	Id2
GO:0032733	positive regulation of interleukin-10 production	31	1	0.31	1625	0.26671	0.26671	Pycard
GO:0072583	clathrin-dependent endocytosis	31	1	0.31	1626	0.26671	0.26671	Clta
GO:0006778	porphyrin-containing compound metabolic process	31	1	0.31	1627	0.26671	0.26671	Tmem14c
GO:2000515	negative regulation of CD4-positive, alpha-beta T cell activation	31	1	0.31	1628	0.26671	0.26671	Tbx21
GO:0032885	regulation of polysaccharide biosynthetic process	31	1	0.31	1629	0.26671	0.26671	Ppp1ca
GO:0044764	multi-organism cellular process	31	1	0.31	1630	0.26671	0.26671	Pglyrp1
GO:0033363	secretory granule organization	31	1	0.31	1631	0.26671	0.26671	Srgn
GO:0051181	cofactor transport	31	1	0.31	1632	0.26671	0.26671	Slc9a3r1
GO:0046189	phenol-containing compound biosynthetic process	31	1	0.31	1633	0.26671	0.26671	Ddt
GO:1902686	mitochondrial outer membrane permeabilization involved in programmed cell death	31	1	0.31	1634	0.26671	0.26671	Slc25a5
GO:0035295	tube development	887	11	8.82	1635	0.26806	0.26806	Bak1 / Ccl5 / Csnk2b / Cxcr3 / Hopx / Id2 / Lgals3 / Ppp1ca / Rnh1 / Ubb / Vasp
GO:0048858	cell projection morphogenesis	525	7	5.22	1636	0.2681	0.2681	Cnp / Dbnl / Rac1 / Rac2 / Ubb / Vasp / Vim
GO:0002009	morphogenesis of an epithelium	439	6	4.37	1638	0.27224	0.27224	Csnk2b / Ppp1ca / Rac1 / Slc9a3r1 / Vasp / Wdr1
GO:0043069	negative regulation of programmed cell death	799	10	7.95	1640	0.27242	0.27242	Ccl5 / Cxcr3 / Glrx / Gnai2 / Lgals3 / Plac8 / Prelid1 / Slc25a5 / Tmbim6 / Ucp2
GO:0040013	negative regulation of locomotion	266	4	2.65	1641	0.27286	0.27286	Cnn2 / Csnk2b / Ddt / Slc9a3r1
GO:0045089	positive regulation of innate immune response	196	5	1.95	547	0.27307	0.04615	Cyba / Irf7 / Lag3 / Pycard / Zbp1
GO:0061025	membrane fusion	103	2	1.02	1642	0.27332	0.27332	Mx1 / Vamp8
GO:0015718	monocarboxylic acid transport	103	2	1.02	1643	0.27332	0.27332	Slc9a3r1 / Slco3a1
GO:0008277	regulation of G protein-coupled receptor signaling pathway	103	2	1.02	1644	0.27332	0.27332	Ccl5 / Gnai2
GO:1904892	regulation of STAT cascade	103	2	1.02	1645	0.27332	0.27332	Ccl5 / Lck
GO:0042098	T cell proliferation	186	7	1.85	192	0.27373	0.00259	Ccl5 / Cd6 / Lgals3 / Psmb10 / Pycard / Rac2 / Spn
GO:0034622	cellular protein-containing complex assembly	892	11	8.87	1646	0.27401	0.27401	Clta / Cyba / Hopx / Mx1 / Pmepa1 / Pstpip1 / Pycard / Rac1 / Tmsb4x / Vamp8 / Vasp
GO:0045597	positive regulation of cell differentiation	892	11	8.87	1647	0.27401	0.27401	Ccl3 / Ccl5 / Clic1 / Glipr2 / Hopx / Id2 / Lck / Rac1 / S100a10 / Tmsb4x / Vim
GO:0071684	organism emergence from protective structure	32	1	0.32	1648	0.27402	0.27402	Ube2a
GO:0035308	negative regulation of protein dephosphorylation	32	1	0.32	1649	0.27402	0.27402	Gnai2
GO:0032924	activin receptor signaling pathway	32	1	0.32	1650	0.27402	0.27402	Csnk2b
GO:0035188	hatching	32	1	0.32	1651	0.27402	0.27402	Ube2a
GO:1903523	negative regulation of blood circulation	32	1	0.32	1652	0.27402	0.27402	Sri
GO:0033598	mammary gland epithelial cell proliferation	32	1	0.32	1653	0.27402	0.27402	Id2
GO:0050869	negative regulation of B cell activation	32	1	0.32	1654	0.27402	0.27402	Id2
GO:0003416	endochondral bone growth	32	1	0.32	1655	0.27402	0.27402	Anxa6
GO:0048512	circadian behavior	32	1	0.32	1656	0.27402	0.27402	Id2
GO:0001773	myeloid dendritic cell activation	32	1	0.32	1657	0.27402	0.27402	Pycard
GO:1902742	apoptotic process involved in development	32	1	0.32	1658	0.27402	0.27402	Bak1
GO:0032728	positive regulation of interferon-beta production	32	1	0.32	1659	0.27402	0.27402	Irf7
GO:0001835	blastocyst hatching	32	1	0.32	1660	0.27402	0.27402	Ube2a
GO:0042832	defense response to protozoan	32	1	0.32	1661	0.27402	0.27402	Gbp2
GO:0006739	NADP metabolic process	32	1	0.32	1662	0.27402	0.27402	Tkt
GO:0032508	DNA duplex unwinding	32	1	0.32	1663	0.27402	0.27402	Rpa2
GO:0098868	bone growth	32	1	0.32	1664	0.27402	0.27402	Anxa6
GO:0060122	inner ear receptor cell stereocilium organization	32	1	0.32	1665	0.27402	0.27402	Slc9a3r1
GO:0045165	cell fate commitment	183	3	1.82	1666	0.27424	0.27424	Id2 / Spn / Tbx21
GO:0030099	myeloid cell differentiation	353	5	3.51	1667	0.27502	0.27502	Ccl3 / Ccl5 / Id2 / Tmem14c / Wdr1
GO:0051240	positive regulation of multicellular organismal process	1493	22	14.85	516	0.27568	0.03894	Ccl3 / Ccl4 / Ccl5 / Cd6 / Clic1 / Cxcr3 / Cyba / Ddt / Glipr2 / Gnai2 / Id2 / Irf7 / Lck / Lgals3 / Plac8 / Pycard / Rac1 / Spn / Tbx21 / Ucp2 / Vamp8 / Vim
GO:0090150	establishment of protein localization to membrane	184	3	1.83	1668	0.27694	0.27694	Rtp4 / Sys1 / Zdhhc18
GO:0014065	phosphatidylinositol 3-kinase signaling	104	2	1.03	1669	0.27701	0.27701	Ccl5 / Slc9a3r1
GO:0046632	alpha-beta T cell differentiation	104	2	1.03	1670	0.27701	0.27701	Spn / Tbx21
GO:0050852	T cell receptor signaling pathway	104	2	1.03	1671	0.27701	0.27701	Lck / Lgals3
GO:0007605	sensory perception of sound	104	2	1.03	1672	0.27701	0.27701	Slc9a3r1 / Wdr1
GO:0042157	lipoprotein metabolic process	105	2	1.04	1673	0.2807	0.2807	Abhd17a / Zdhhc18
GO:0034332	adherens junction organization	105	2	1.04	1674	0.2807	0.2807	Rac1 / S100a10
GO:0060251	regulation of glial cell proliferation	33	1	0.33	1675	0.28126	0.28126	Vim
GO:0045191	regulation of isotype switching	33	1	0.33	1676	0.28126	0.28126	Tbx21
GO:1901068	guanosine-containing compound metabolic process	33	1	0.33	1677	0.28126	0.28126	Gimap7
GO:0046006	regulation of activated T cell proliferation	33	1	0.33	1678	0.28126	0.28126	Pycard
GO:2001024	negative regulation of response to drug	33	1	0.33	1679	0.28126	0.28126	Glrx
GO:2001038	regulation of cellular response to drug	33	1	0.33	1680	0.28126	0.28126	Glrx
GO:0043001	Golgi to plasma membrane protein transport	33	1	0.33	1681	0.28126	0.28126	Sys1
GO:0010762	regulation of fibroblast migration	33	1	0.33	1682	0.28126	0.28126	Rac1
GO:0097009	energy homeostasis	33	1	0.33	1683	0.28126	0.28126	Ubb
GO:0033028	myeloid cell apoptotic process	33	1	0.33	1684	0.28126	0.28126	Ccl5
GO:1901976	regulation of cell cycle checkpoint	33	1	0.33	1685	0.28126	0.28126	Rpa2
GO:0060071	Wnt signaling pathway, planar cell polarity pathway	33	1	0.33	1686	0.28126	0.28126	Rac1
GO:0007622	rhythmic behavior	33	1	0.33	1687	0.28126	0.28126	Id2
GO:0010862	positive regulation of pathway-restricted SMAD protein phosphorylation	33	1	0.33	1688	0.28126	0.28126	Csnk2b
GO:0032786	positive regulation of DNA-templated transcription, elongation	33	1	0.33	1689	0.28126	0.28126	Supt4a
GO:0010518	positive regulation of phospholipase activity	33	1	0.33	1690	0.28126	0.28126	Ccl5
GO:1904707	positive regulation of vascular smooth muscle cell proliferation	33	1	0.33	1691	0.28126	0.28126	Gnai2
GO:0042592	homeostatic process	1478	24	14.7	324	0.28155	0.01086	Anxa6 / Bak1 / Ccl3 / Ccl5 / Cd52 / Cxcr3 / Cxcr6 / Cyba / Glrx / Gnai2 / Id2 / Lat / Lck / Plac8 / Rac1 / Rac2 / Rpa2 / Sh3bgrl3 / Slc9a3r1 / Sri / Tmbim6 / Tmem14c / Ubb / Ucp2
GO:0007163	establishment or maintenance of cell polarity	186	3	1.85	1692	0.28234	0.28234	Rhog / Slc9a3r1 / Wdr1
GO:0019933	cAMP-mediated signaling	114	4	1.13	443	0.28278	0.02703	Cxcr3 / Gnai2 / Gng2 / Slc9a3r1
GO:0051701	interaction with host	106	2	1.05	1693	0.28439	0.28439	Lgals1 / Vamp8
GO:0090066	regulation of anatomical structure size	448	6	4.46	1695	0.28762	0.28762	Pycard / Rac1 / Slc9a3r1 / Tmsb4x / Vasp / Wdr1
GO:0051099	positive regulation of binding	188	3	1.87	1696	0.28776	0.28776	Derl1 / Lgals3 / S100a10
GO:0031099	regeneration	107	2	1.06	1697	0.28807	0.28807	Csnk2b / Hopx
GO:0071322	cellular response to carbohydrate stimulus	107	2	1.06	1698	0.28807	0.28807	Sri / Ucp2
GO:0010811	positive regulation of cell-substrate adhesion	107	2	1.06	1699	0.28807	0.28807	Rac1 / S100a10
GO:0042542	response to hydrogen peroxide	107	2	1.06	1700	0.28807	0.28807	Glrx / Lck
GO:0044706	multi-multicellular organism process	107	2	1.06	1701	0.28807	0.28807	H2-Q7 / Ube2a
GO:1901571	fatty acid derivative transport	34	1	0.34	1702	0.28843	0.28843	Slco3a1
GO:0001937	negative regulation of endothelial cell proliferation	34	1	0.34	1703	0.28843	0.28843	Cxcr3
GO:0002888	positive regulation of myeloid leukocyte mediated immunity	34	1	0.34	1704	0.28843	0.28843	Vamp8
GO:0030225	macrophage differentiation	34	1	0.34	1705	0.28843	0.28843	Id2
GO:0045103	intermediate filament-based process	34	1	0.34	1706	0.28843	0.28843	Vim
GO:0045104	intermediate filament cytoskeleton organization	34	1	0.34	1707	0.28843	0.28843	Vim
GO:0043551	regulation of phosphatidylinositol 3-kinase activity	34	1	0.34	1708	0.28843	0.28843	Rac1
GO:0009250	glucan biosynthetic process	34	1	0.34	1709	0.28843	0.28843	Ppp1ca
GO:0035794	positive regulation of mitochondrial membrane permeability	34	1	0.34	1710	0.28843	0.28843	Slc25a5
GO:0097035	regulation of membrane lipid distribution	34	1	0.34	1711	0.28843	0.28843	Prelid1
GO:0033628	regulation of cell adhesion mediated by integrin	34	1	0.34	1712	0.28843	0.28843	Ccl5
GO:0090102	cochlea development	34	1	0.34	1713	0.28843	0.28843	Rac1
GO:0005978	glycogen biosynthetic process	34	1	0.34	1714	0.28843	0.28843	Ppp1ca
GO:0034243	regulation of transcription elongation from RNA polymerase II promoter	34	1	0.34	1715	0.28843	0.28843	Supt4a
GO:0072604	interleukin-6 secretion	34	1	0.34	1716	0.28843	0.28843	Pycard
GO:0036474	cell death in response to hydrogen peroxide	34	1	0.34	1717	0.28843	0.28843	Glrx
GO:0071715	icosanoid transport	34	1	0.34	1718	0.28843	0.28843	Slco3a1
GO:0072350	tricarboxylic acid metabolic process	34	1	0.34	1719	0.28843	0.28843	Mdh2
GO:0001933	negative regulation of protein phosphorylation	360	5	3.58	1720	0.28845	0.28845	Bak1 / Dusp2 / Pmepa1 / Pycard / Slc9a3r1
GO:0097530	granulocyte migration	122	9	1.21	32	0.28983	3.5e-06	Ccl3 / Ccl4 / Ccl5 / Dapk2 / Jaml / Lgals3 / Rac1 / Rac2 / Wdr1
GO:0044089	positive regulation of cellular component biogenesis	450	6	4.48	1722	0.29107	0.29107	Pycard / Rac1 / Rac2 / S100a10 / Sub1 / Vasp
GO:1902806	regulation of cell cycle G1/S phase transition	108	2	1.07	1723	0.29176	0.29176	Id2 / Rpa2
GO:0045667	regulation of osteoblast differentiation	108	2	1.07	1724	0.29176	0.29176	Clic1 / Id2
GO:1901342	regulation of vasculature development	275	4	2.74	1725	0.29283	0.29283	Ccl5 / Cxcr3 / Lgals3 / Rnh1
GO:0061061	muscle structure development	541	7	5.38	1726	0.29303	0.29303	Actg1 / Hopx / Lgals1 / Myl6 / Sra1 / Tmsb4x / Wdr1
GO:0009057	macromolecule catabolic process	1044	15	10.38	870	0.2936	0.0958	Abhd17a / Ctsd / Ctsw / Derl1 / Gzma / Isg20 / Pglyrp1 / Ppp1ca / Psmb10 / Psmb3 / Psmb9 / Tbx21 / Ubb / Ube2a / Vim
GO:0010817	regulation of hormone levels	363	5	3.61	1728	0.29424	0.29424	Ccl5 / Glrx / Sri / Ucp2 / Vamp8
GO:0001678	cellular glucose homeostasis	109	2	1.08	1729	0.29544	0.29544	Sri / Ucp2
GO:0060135	maternal process involved in female pregnancy	35	1	0.35	1730	0.29552	0.29552	Ube2a
GO:0051898	negative regulation of protein kinase B signaling	35	1	0.35	1731	0.29552	0.29552	Slc9a3r1
GO:1903727	positive regulation of phospholipid metabolic process	35	1	0.35	1732	0.29552	0.29552	Rac1
GO:0002686	negative regulation of leukocyte migration	35	1	0.35	1733	0.29552	0.29552	Ddt
GO:0090175	regulation of establishment of planar polarity	35	1	0.35	1734	0.29552	0.29552	Rac1
GO:0071158	positive regulation of cell cycle arrest	35	1	0.35	1735	0.29552	0.29552	Id2
GO:0000266	mitochondrial fission	35	1	0.35	1736	0.29552	0.29552	Mx1
GO:0045622	regulation of T-helper cell differentiation	35	1	0.35	1737	0.29552	0.29552	Tbx21
GO:0030901	midbrain development	35	1	0.35	1738	0.29552	0.29552	Rac1
GO:1903115	regulation of actin filament-based movement	35	1	0.35	1739	0.29552	0.29552	Sri
GO:0043277	apoptotic cell clearance	35	1	0.35	1740	0.29552	0.29552	Rac1
GO:0071526	semaphorin-plexin signaling pathway	35	1	0.35	1741	0.29552	0.29552	Rac1
GO:0045933	positive regulation of muscle contraction	35	1	0.35	1742	0.29552	0.29552	Lck
GO:0070229	negative regulation of lymphocyte apoptotic process	35	1	0.35	1743	0.29552	0.29552	Ccl5
GO:0002573	myeloid leukocyte differentiation	191	3	1.9	1744	0.2959	0.2959	Ccl3 / Ccl5 / Id2
GO:0051222	positive regulation of protein transport	365	5	3.63	1746	0.29811	0.29811	Ccl3 / Glrx / Pycard / Sri / Vamp8
GO:0045637	regulation of myeloid cell differentiation	192	3	1.91	1747	0.29861	0.29861	Ccl3 / Ccl5 / Id2
GO:0001936	regulation of endothelial cell proliferation	110	2	1.09	1748	0.29911	0.29911	Cxcr3 / Cyba
GO:0051961	negative regulation of nervous system development	278	4	2.77	1750	0.29953	0.29953	H2-K1 / Id2 / Lgals1 / Vim
GO:0009117	nucleotide metabolic process	455	6	4.53	1751	0.29972	0.29972	Cnp / Cox5b / Gimap7 / Mdh2 / Tkt / Uqcrc1
GO:0051239	regulation of multicellular organismal process	2492	39	24.79	170	0.3007	0.00195	Anxa6 / Ccl3 / Ccl4 / Ccl5 / Cd6 / Clic1 / Csnk2b / Ctla2a / Cxcr3 / Cyba / Ddt / Glipr2 / Gnai2 / H2-K1 / Hopx / Id2 / Irf7 / Lag3 / Lck / Lgals1 / Lgals3 / Nmi / Pglyrp1 / Pla2g16 / Plac8 / Prelid1 / Pycard / Rac1 / Rnh1 / Slc9a3r1 / Spn / Srgn / Sri / Tbx21 / Ucp2 / Vamp8 / Vim / Wdr1 / Zfp706
GO:0032990	cell part morphogenesis	546	7	5.43	1752	0.30092	0.30092	Cnp / Dbnl / Rac1 / Rac2 / Ubb / Vasp / Vim
GO:0050807	regulation of synapse organization	193	3	1.92	1753	0.30133	0.30133	Abhd17a / Srgn / Tuba1a
GO:0003382	epithelial cell morphogenesis	36	1	0.36	1754	0.30254	0.30254	Rac1
GO:0014014	negative regulation of gliogenesis	36	1	0.36	1755	0.30254	0.30254	Id2
GO:1902108	regulation of mitochondrial membrane permeability involved in apoptotic process	36	1	0.36	1756	0.30254	0.30254	Slc25a5
GO:0048806	genitalia development	36	1	0.36	1757	0.30254	0.30254	Bak1
GO:1905710	positive regulation of membrane permeability	36	1	0.36	1758	0.30254	0.30254	Slc25a5
GO:0042743	hydrogen peroxide metabolic process	36	1	0.36	1759	0.30254	0.30254	Cyba
GO:0042551	neuron maturation	36	1	0.36	1760	0.30254	0.30254	Rac1
GO:0010569	regulation of double-strand break repair via homologous recombination	36	1	0.36	1761	0.30254	0.30254	Rpa2
GO:0032881	regulation of polysaccharide metabolic process	36	1	0.36	1762	0.30254	0.30254	Ppp1ca
GO:0042092	type 2 immune response	36	1	0.36	1763	0.30254	0.30254	Tbx21
GO:0030218	erythrocyte differentiation	111	2	1.1	1764	0.30279	0.30279	Id2 / Tmem14c
GO:1902532	negative regulation of intracellular signal transduction	457	6	4.55	1768	0.30319	0.30319	Dusp2 / Gnai2 / Pycard / Slc9a3r1 / Sri / Tmbim6
GO:0002449	lymphocyte mediated immunity	247	12	2.46	38	0.30887	6.6e-06	Cd8a / Gzmb / H2-K1 / H2-Q6 / H2-Q7 / H2-T22 / Irf7 / Lag3 / Prf1 / Spn / Tap1 / Tbx21
GO:2000142	regulation of DNA-templated transcription, initiation	37	1	0.37	1771	0.3095	0.3095	Sub1
GO:1903573	negative regulation of response to endoplasmic reticulum stress	37	1	0.37	1772	0.3095	0.3095	Tmbim6
GO:0001782	B cell homeostasis	37	1	0.37	1773	0.3095	0.3095	Bak1
GO:0002369	T cell cytokine production	37	1	0.37	1774	0.3095	0.3095	Tbx21
GO:0032814	regulation of natural killer cell activation	37	1	0.37	1775	0.3095	0.3095	Pglyrp1
GO:0045911	positive regulation of DNA recombination	37	1	0.37	1776	0.3095	0.3095	Tbx21
GO:0061844	antimicrobial humoral immune response mediated by antimicrobial peptide	37	1	0.37	1777	0.3095	0.3095	Pglyrp1
GO:0016064	immunoglobulin mediated immune response	113	2	1.12	1778	0.31013	0.31013	Irf7 / Tbx21
GO:0051094	positive regulation of developmental process	1205	14	11.99	1779	0.31156	0.31156	Ccl3 / Ccl5 / Clic1 / Cxcr3 / Glipr2 / Hopx / Id2 / Lck / Lgals3 / Rac1 / S100a10 / Tbx21 / Tmsb4x / Vim
GO:0006753	nucleoside phosphate metabolic process	462	6	4.6	1780	0.31191	0.31191	Cnp / Cox5b / Gimap7 / Mdh2 / Tkt / Uqcrc1
GO:0071310	cellular response to organic substance	1679	29	16.7	176	0.31376	0.00203	Actg1 / Bak1 / Ccl3 / Ccl4 / Ccl5 / Cd6 / Csnk2b / Cyba / Derl1 / Gbp2 / Glrx / Gnai2 / Gng2 / H2-Q7 / H2afz / Igtp / Irf7 / Nmi / Pmepa1 / Pycard / Slc25a5 / Sri / Tbx21 / Tmbim6 / Ucp2 / Vamp8 / Vim / Zbp1 / Zyx
GO:0045216	cell-cell junction organization	114	2	1.13	1783	0.3138	0.3138	Rac1 / Wdr1
GO:0050803	regulation of synapse structure or activity	198	3	1.97	1784	0.31494	0.31494	Abhd17a / Srgn / Tuba1a
GO:0048873	homeostasis of number of cells within a tissue	38	1	0.38	1785	0.31638	0.31638	Rac1
GO:0045740	positive regulation of DNA replication	38	1	0.38	1786	0.31638	0.31638	Rac1
GO:0048546	digestive tract morphogenesis	38	1	0.38	1787	0.31638	0.31638	Id2
GO:0033013	tetrapyrrole metabolic process	38	1	0.38	1788	0.31638	0.31638	Tmem14c
GO:0038083	peptidyl-tyrosine autophosphorylation	38	1	0.38	1789	0.31638	0.31638	Lck
GO:0032527	protein exit from endoplasmic reticulum	38	1	0.38	1790	0.31638	0.31638	Derl1
GO:0060351	cartilage development involved in endochondral bone morphogenesis	38	1	0.38	1791	0.31638	0.31638	Anxa6
GO:0050918	positive chemotaxis	38	1	0.38	1792	0.31638	0.31638	Lgals3
GO:0051493	regulation of cytoskeleton organization	465	6	4.63	1793	0.31716	0.31716	Pycard / Rac1 / S100a10 / Tmsb4x / Vasp / Wdr1
GO:0055085	transmembrane transport	917	17	9.12	312	0.31745	0.00962	Anxa6 / Atp6v1f / Bak1 / Clic1 / Cox5b / Cxcr3 / Cyba / Fxyd5 / Glrx / Lck / Slc25a5 / Slc9a3r1 / Slco3a1 / Sri / Tap1 / Ucp2 / Wdr1
GO:0019724	B cell mediated immunity	115	2	1.14	1794	0.31746	0.31746	Irf7 / Tbx21
GO:0002757	immune response-activating signal transduction	286	4	2.84	1795	0.31749	0.31749	Cyba / Irf7 / Lck / Lgals3
GO:0023061	signal release	375	5	3.73	1796	0.3176	0.3176	Ccl5 / Glrx / Sri / Ucp2 / Vamp8
GO:0035239	tube morphogenesis	742	9	7.38	1797	0.31895	0.31895	Bak1 / Ccl5 / Csnk2b / Cxcr3 / Id2 / Lgals3 / Ppp1ca / Rnh1 / Vasp
GO:0007188	adenylate cyclase-modulating G protein-coupled receptor signaling pathway	124	4	1.23	494	0.31903	0.03525	Cxcr3 / Gnai2 / Gng2 / Slc9a3r1
GO:0009615	response to virus	229	11	2.28	52	0.32081	1.8e-05	Ccl5 / Cd8a / Ifi27l2a / Irf7 / Isg20 / Mx1 / Prf1 / Pycard / Rtp4 / Spn / Zbp1
GO:0071236	cellular response to antibiotic	116	2	1.15	1799	0.32111	0.32111	Crip1 / Glrx
GO:0032392	DNA geometric change	39	1	0.39	1803	0.3232	0.3232	Rpa2
GO:0046676	negative regulation of insulin secretion	39	1	0.39	1804	0.3232	0.3232	Ucp2
GO:0051646	mitochondrion localization	39	1	0.39	1805	0.3232	0.3232	Ubb
GO:0042246	tissue regeneration	39	1	0.39	1806	0.3232	0.3232	Hopx
GO:0010765	positive regulation of sodium ion transport	39	1	0.39	1807	0.3232	0.3232	Glrx
GO:0019674	NAD metabolic process	39	1	0.39	1808	0.3232	0.3232	Mdh2
GO:0006284	base-excision repair	39	1	0.39	1809	0.3232	0.3232	Rpa2
GO:0032757	positive regulation of interleukin-8 production	39	1	0.39	1810	0.3232	0.3232	Pycard
GO:1903307	positive regulation of regulated secretory pathway	39	1	0.39	1811	0.3232	0.3232	Vamp8
GO:0007259	JAK-STAT cascade	117	2	1.16	1813	0.32477	0.32477	Ccl5 / Lck
GO:0046677	response to antibiotic	202	3	2.01	1815	0.32583	0.32583	Crip1 / Glrx / Lck
GO:0050678	regulation of epithelial cell proliferation	290	4	2.88	1816	0.3265	0.3265	Ccl5 / Cxcr3 / Cyba / Jaml
GO:0031175	neuron projection development	841	10	8.37	1818	0.32662	0.32662	Cnp / Dbnl / H2-K1 / Lgals1 / Rac1 / Rac2 / Slc9a3r1 / Ubb / Vasp / Vim
GO:0072657	protein localization to membrane	456	11	4.54	259	0.32776	0.00587	Abhd17a / Lgals3 / Myl12a / Rac1 / Rhog / Rtp4 / S100a10 / Slc9a3r1 / Sys1 / Vamp8 / Zdhhc18
GO:0008217	regulation of blood pressure	118	2	1.17	1819	0.32841	0.32841	Cyba / Id2
GO:0032675	regulation of interleukin-6 production	118	2	1.17	1820	0.32841	0.32841	Cyba / Pycard
GO:0002221	pattern recognition receptor signaling pathway	118	2	1.17	1821	0.32841	0.32841	Cyba / Irf7
GO:0034976	response to endoplasmic reticulum stress	203	3	2.02	1822	0.32856	0.32856	Bak1 / Derl1 / Tmbim6
GO:0010721	negative regulation of cell development	291	4	2.89	1823	0.32876	0.32876	H2-K1 / Id2 / Lgals1 / Vim
GO:0032965	regulation of collagen biosynthetic process	40	1	0.4	1824	0.32995	0.32995	Vim
GO:1901031	regulation of response to reactive oxygen species	40	1	0.4	1825	0.32995	0.32995	Glrx
GO:0007566	embryo implantation	40	1	0.4	1826	0.32995	0.32995	H2-Q7
GO:1902041	regulation of extrinsic apoptotic signaling pathway via death domain receptors	40	1	0.4	1827	0.32995	0.32995	Lgals3
GO:0043124	negative regulation of I-kappaB kinase/NF-kappaB signaling	40	1	0.4	1828	0.32995	0.32995	Pycard
GO:0060412	ventricular septum morphogenesis	40	1	0.4	1829	0.32995	0.32995	Id2
GO:0060193	positive regulation of lipase activity	40	1	0.4	1830	0.32995	0.32995	Ccl5
GO:0007193	adenylate cyclase-inhibiting G protein-coupled receptor signaling pathway	40	1	0.4	1831	0.32995	0.32995	Gnai2
GO:1904951	positive regulation of establishment of protein localization	382	5	3.8	1832	0.33133	0.33133	Ccl3 / Glrx / Pycard / Sri / Vamp8
GO:1901652	response to peptide	293	4	2.91	1833	0.33328	0.33328	Gnai2 / H2afz / Serpina3g / Vim
GO:0002758	innate immune response-activating signal transduction	120	2	1.19	1834	0.33569	0.33569	Cyba / Irf7
GO:0097696	STAT cascade	120	2	1.19	1835	0.33569	0.33569	Ccl5 / Lck
GO:1903322	positive regulation of protein modification by small protein conjugation or removal	120	2	1.19	1836	0.33569	0.33569	Derl1 / Nmi
GO:0031214	biomineral tissue development	120	2	1.19	1837	0.33569	0.33569	Anxa6 / Srgn
GO:0002714	positive regulation of B cell mediated immunity	41	1	0.41	1838	0.33664	0.33664	Tbx21
GO:0002891	positive regulation of immunoglobulin mediated immune response	41	1	0.41	1839	0.33664	0.33664	Tbx21
GO:0021536	diencephalon development	41	1	0.41	1840	0.33664	0.33664	Ubb
GO:0050798	activated T cell proliferation	41	1	0.41	1841	0.33664	0.33664	Pycard
GO:0046636	negative regulation of alpha-beta T cell activation	41	1	0.41	1842	0.33664	0.33664	Tbx21
GO:0050873	brown fat cell differentiation	41	1	0.41	1843	0.33664	0.33664	Plac8
GO:0061337	cardiac conduction	41	1	0.41	1844	0.33664	0.33664	Sri
GO:0045668	negative regulation of osteoblast differentiation	41	1	0.41	1845	0.33664	0.33664	Id2
GO:0045687	positive regulation of glial cell differentiation	41	1	0.41	1846	0.33664	0.33664	Id2
GO:0002822	regulation of adaptive immune response based on somatic recombination of immune receptors built from immunoglobulin superfamily domains	155	6	1.54	231	0.33865	0.00454	H2-K1 / H2-Q6 / H2-Q7 / H2-T22 / Spn / Tbx21
GO:0030534	adult behavior	121	2	1.2	1847	0.33932	0.33932	Cnp / Id2
GO:0048511	rhythmic process	207	3	2.06	1848	0.33946	0.33946	Id2 / Ppp1ca / Prf1
GO:0030595	leukocyte chemotaxis	186	10	1.85	50	0.34095	1.7e-05	Ccl3 / Ccl4 / Ccl5 / Cxcr3 / Dapk2 / Ddt / Jaml / Lgals3 / Rac1 / Rac2
GO:0001101	response to acid chemical	208	3	2.07	1849	0.34218	0.34218	Gng2 / S100a10 / Tmbim6
GO:0043543	protein acylation	208	3	2.07	1850	0.34218	0.34218	Abhd17a / Mdh2 / Zdhhc18
GO:0001935	endothelial cell proliferation	122	2	1.21	1851	0.34294	0.34294	Cxcr3 / Cyba
GO:0008016	regulation of heart contraction	122	2	1.21	1852	0.34294	0.34294	Hopx / Sri
GO:0050715	positive regulation of cytokine secretion	122	2	1.21	1853	0.34294	0.34294	Ccl3 / Pycard
GO:0048015	phosphatidylinositol-mediated signaling	122	2	1.21	1854	0.34294	0.34294	Ccl5 / Slc9a3r1
GO:0031333	negative regulation of protein complex assembly	122	2	1.21	1855	0.34294	0.34294	Pmepa1 / Tmsb4x
GO:0120161	regulation of cold-induced thermogenesis	122	2	1.21	1856	0.34294	0.34294	Plac8 / Ucp2
GO:0034101	erythrocyte homeostasis	122	2	1.21	1857	0.34294	0.34294	Id2 / Tmem14c
GO:0106106	cold-induced thermogenesis	122	2	1.21	1858	0.34294	0.34294	Plac8 / Ucp2
GO:0007131	reciprocal meiotic recombination	42	1	0.42	1859	0.34325	0.34325	Rpa2
GO:0001974	blood vessel remodeling	42	1	0.42	1860	0.34325	0.34325	Bak1
GO:0043550	regulation of lipid kinase activity	42	1	0.42	1861	0.34325	0.34325	Rac1
GO:0018198	peptidyl-cysteine modification	42	1	0.42	1862	0.34325	0.34325	Zdhhc18
GO:0014009	glial cell proliferation	42	1	0.42	1863	0.34325	0.34325	Vim
GO:0070542	response to fatty acid	42	1	0.42	1864	0.34325	0.34325	Gng2
GO:0043627	response to estrogen	42	1	0.42	1865	0.34325	0.34325	Sra1
GO:0010718	positive regulation of epithelial to mesenchymal transition	42	1	0.42	1866	0.34325	0.34325	Glipr2
GO:0045581	negative regulation of T cell differentiation	42	1	0.42	1867	0.34325	0.34325	Tbx21
GO:0035825	homologous recombination	42	1	0.42	1868	0.34325	0.34325	Rpa2
GO:0034113	heterotypic cell-cell adhesion	42	1	0.42	1869	0.34325	0.34325	Lck
GO:0010596	negative regulation of endothelial cell migration	42	1	0.42	1870	0.34325	0.34325	Csnk2b
GO:2000677	regulation of transcription regulatory region DNA binding	42	1	0.42	1871	0.34325	0.34325	Sri
GO:0043470	regulation of carbohydrate catabolic process	42	1	0.42	1872	0.34325	0.34325	Ppp1ca
GO:0010563	negative regulation of phosphorus metabolic process	480	6	4.77	1874	0.34362	0.34362	Bak1 / Dusp2 / Gnai2 / Pmepa1 / Pycard / Slc9a3r1
GO:0045936	negative regulation of phosphate metabolic process	480	6	4.77	1875	0.34362	0.34362	Bak1 / Dusp2 / Gnai2 / Pmepa1 / Pycard / Slc9a3r1
GO:0002764	immune response-regulating signaling pathway	298	4	2.96	1876	0.34458	0.34458	Cyba / Irf7 / Lck / Lgals3
GO:0002444	myeloid leukocyte mediated immunity	82	4	0.82	305	0.34467	0.00902	Lat / Rac2 / Vamp8 / Wdr1
GO:0051588	regulation of neurotransmitter transport	123	2	1.22	1877	0.34656	0.34656	Lgals3 / Vamp8
GO:0001824	blastocyst development	123	2	1.22	1878	0.34656	0.34656	Hopx / Ube2a
GO:0007140	male meiotic nuclear division	43	1	0.43	1882	0.3498	0.3498	Ubb
GO:1903202	negative regulation of oxidative stress-induced cell death	43	1	0.43	1883	0.3498	0.3498	Glrx
GO:0031648	protein destabilization	43	1	0.43	1884	0.3498	0.3498	Derl1
GO:0090303	positive regulation of wound healing	43	1	0.43	1885	0.3498	0.3498	Hopx
GO:0030834	regulation of actin filament depolymerization	43	1	0.43	1886	0.3498	0.3498	Wdr1
GO:0010517	regulation of phospholipase activity	43	1	0.43	1887	0.3498	0.3498	Ccl5
GO:2001239	regulation of extrinsic apoptotic signaling pathway in absence of ligand	43	1	0.43	1888	0.3498	0.3498	Ppp1ca
GO:0032635	interleukin-6 production	124	2	1.23	1889	0.35018	0.35018	Cyba / Pycard
GO:0052547	regulation of peptidase activity	296	7	2.94	450	0.3508	0.02858	Bak1 / Ifi27l2a / Lck / Prelid1 / Psmb9 / Pycard / Serpina3g
GO:0019935	cyclic-nucleotide-mediated signaling	133	4	1.32	535	0.35129	0.04376	Cxcr3 / Gnai2 / Gng2 / Slc9a3r1
GO:0048017	inositol lipid-mediated signaling	125	2	1.24	1891	0.35378	0.35378	Ccl5 / Slc9a3r1
GO:0007187	G protein-coupled receptor signaling pathway, coupled to cyclic nucleotide second messenger	134	4	1.33	539	0.35485	0.04478	Cxcr3 / Gnai2 / Gng2 / Slc9a3r1
GO:0006368	transcription elongation from RNA polymerase II promoter	44	1	0.44	1892	0.35629	0.35629	Supt4a
GO:0019748	secondary metabolic process	44	1	0.44	1893	0.35629	0.35629	Ddt
GO:0010761	fibroblast migration	44	1	0.44	1894	0.35629	0.35629	Rac1
GO:0001755	neural crest cell migration	44	1	0.44	1895	0.35629	0.35629	Anxa6
GO:1900408	negative regulation of cellular response to oxidative stress	44	1	0.44	1896	0.35629	0.35629	Glrx
GO:0051606	detection of stimulus	126	2	1.25	1897	0.35738	0.35738	Pglyrp1 / Rtp4
GO:0046496	nicotinamide nucleotide metabolic process	126	2	1.25	1898	0.35738	0.35738	Mdh2 / Tkt
GO:0017156	calcium ion regulated exocytosis	126	2	1.25	1899	0.35738	0.35738	Gnai2 / Vamp8
GO:0034330	cell junction organization	214	3	2.13	1900	0.3585	0.3585	Rac1 / S100a10 / Wdr1
GO:0002700	regulation of production of molecular mediator of immune response	127	2	1.26	1901	0.36097	0.36097	Tbx21 / Tmbim6
GO:0050954	sensory perception of mechanical stimulus	127	2	1.26	1902	0.36097	0.36097	Slc9a3r1 / Wdr1
GO:1903793	positive regulation of anion transport	45	1	0.45	1903	0.36271	0.36271	Prelid1
GO:0016574	histone ubiquitination	45	1	0.45	1904	0.36271	0.36271	Ube2a
GO:0090278	negative regulation of peptide hormone secretion	45	1	0.45	1905	0.36271	0.36271	Ucp2
GO:0045646	regulation of erythrocyte differentiation	45	1	0.45	1906	0.36271	0.36271	Id2
GO:0042088	T-helper 1 type immune response	45	1	0.45	1907	0.36271	0.36271	Spn
GO:0043297	apical junction assembly	45	1	0.45	1908	0.36271	0.36271	Wdr1
GO:0019362	pyridine nucleotide metabolic process	128	2	1.27	1910	0.36455	0.36455	Mdh2 / Tkt
GO:0042326	negative regulation of phosphorylation	399	5	3.97	1911	0.36491	0.36491	Bak1 / Dusp2 / Pmepa1 / Pycard / Slc9a3r1
GO:0030335	positive regulation of cell migration	466	11	4.64	272	0.36513	0.00687	Ccl4 / Ccl5 / Dapk2 / Glipr2 / Gnai2 / Lgals3 / Pycard / Rac1 / Rac2 / Spn / Tmsb4x
GO:0019080	viral gene expression	55	3	0.55	369	0.36518	0.01735	Ccl4 / Ccl5 / Eif3f
GO:0048839	inner ear development	145	4	1.44	616	0.36573	0.05676	H2-K1 / Lrp10 / Rac1 / Slc9a3r1
GO:0006470	protein dephosphorylation	217	3	2.16	1913	0.36664	0.36664	Dusp2 / Gnai2 / Ppp1ca
GO:0009205	purine ribonucleoside triphosphate metabolic process	217	3	2.16	1914	0.36664	0.36664	Cox5b / Gimap7 / Uqcrc1
GO:1990845	adaptive thermogenesis	129	2	1.28	1915	0.36813	0.36813	Plac8 / Ucp2
GO:0002377	immunoglobulin production	129	2	1.28	1916	0.36813	0.36813	Tbx21 / Tmbim6
GO:0002833	positive regulation of response to biotic stimulus	46	1	0.46	1917	0.36907	0.36907	Cyba
GO:0006940	regulation of smooth muscle contraction	46	1	0.46	1918	0.36907	0.36907	Lck
GO:0030865	cortical cytoskeleton organization	46	1	0.46	1919	0.36907	0.36907	Wdr1
GO:0002639	positive regulation of immunoglobulin production	46	1	0.46	1920	0.36907	0.36907	Tbx21
GO:0010712	regulation of collagen metabolic process	46	1	0.46	1921	0.36907	0.36907	Vim
GO:0048663	neuron fate commitment	46	1	0.46	1922	0.36907	0.36907	Id2
GO:0030042	actin filament depolymerization	46	1	0.46	1923	0.36907	0.36907	Wdr1
GO:0035567	non-canonical Wnt signaling pathway	46	1	0.46	1924	0.36907	0.36907	Rac1
GO:0031113	regulation of microtubule polymerization	46	1	0.46	1925	0.36907	0.36907	Rac1
GO:0051290	protein heterotetramerization	46	1	0.46	1926	0.36907	0.36907	S100a10
GO:0032653	regulation of interleukin-10 production	46	1	0.46	1927	0.36907	0.36907	Pycard
GO:0050922	negative regulation of chemotaxis	46	1	0.46	1928	0.36907	0.36907	Ddt
GO:0021795	cerebral cortex cell migration	46	1	0.46	1929	0.36907	0.36907	Rac1
GO:0060341	regulation of cellular localization	799	11	7.95	1266	0.36922	0.17211	Abhd17a / Bak1 / Cxcr3 / Cyba / Lgals3 / Rac2 / Rhog / Sri / Tmbim6 / Ucp2 / Vamp8
GO:0042692	muscle cell differentiation	309	4	3.07	1930	0.36947	0.36947	Actg1 / Hopx / Tmsb4x / Wdr1
GO:0070228	regulation of lymphocyte apoptotic process	62	3	0.62	429	0.37156	0.02379	Ccl5 / Lgals3 / Prelid1
GO:0051248	negative regulation of protein metabolic process	875	10	8.7	1931	0.37207	0.37207	Bak1 / Ctla2a / Dusp2 / Gnai2 / Lag3 / Nmi / Pmepa1 / Pycard / Serpina3g / Slc9a3r1
GO:0032870	cellular response to hormone stimulus	404	5	4.02	1933	0.37481	0.37481	Csnk2b / Glrx / Gnai2 / Gng2 / H2afz
GO:0009749	response to glucose	131	2	1.3	1934	0.37526	0.37526	Sri / Ucp2
GO:0045190	isotype switching	47	1	0.47	1935	0.37537	0.37537	Tbx21
GO:0086003	cardiac muscle cell contraction	47	1	0.47	1936	0.37537	0.37537	Sri
GO:1990874	vascular smooth muscle cell proliferation	47	1	0.47	1937	0.37537	0.37537	Gnai2
GO:0032784	regulation of DNA-templated transcription, elongation	47	1	0.47	1938	0.37537	0.37537	Supt4a
GO:0001825	blastocyst formation	47	1	0.47	1939	0.37537	0.37537	Hopx
GO:0010812	negative regulation of cell-substrate adhesion	47	1	0.47	1940	0.37537	0.37537	Lgals1
GO:1902883	negative regulation of response to oxidative stress	47	1	0.47	1941	0.37537	0.37537	Glrx
GO:0043370	regulation of CD4-positive, alpha-beta T cell differentiation	47	1	0.47	1942	0.37537	0.37537	Tbx21
GO:1904705	regulation of vascular smooth muscle cell proliferation	47	1	0.47	1943	0.37537	0.37537	Gnai2
GO:0002204	somatic recombination of immunoglobulin genes involved in immune response	47	1	0.47	1944	0.37537	0.37537	Tbx21
GO:0002208	somatic diversification of immunoglobulins involved in immune response	47	1	0.47	1945	0.37537	0.37537	Tbx21
GO:0009199	ribonucleoside triphosphate metabolic process	221	3	2.2	1947	0.37747	0.37747	Cox5b / Gimap7 / Uqcrc1
GO:0016050	vesicle organization	221	3	2.2	1948	0.37747	0.37747	S100a10 / Srgn / Vamp8
GO:0043066	negative regulation of apoptotic process	784	9	7.8	1949	0.37831	0.37831	Ccl5 / Cxcr3 / Gnai2 / Lgals3 / Plac8 / Prelid1 / Slc25a5 / Tmbim6 / Ucp2
GO:0009266	response to temperature stimulus	132	2	1.31	1950	0.37881	0.37881	Plac8 / Ucp2
GO:0009746	response to hexose	132	2	1.31	1951	0.37881	0.37881	Sri / Ucp2
GO:0072524	pyridine-containing compound metabolic process	132	2	1.31	1952	0.37881	0.37881	Mdh2 / Tkt
GO:0010332	response to gamma radiation	48	1	0.48	1954	0.3816	0.3816	Bak1
GO:0048286	lung alveolus development	48	1	0.48	1955	0.3816	0.3816	Hopx
GO:0032481	positive regulation of type I interferon production	48	1	0.48	1956	0.3816	0.3816	Irf7
GO:0043666	regulation of phosphoprotein phosphatase activity	48	1	0.48	1957	0.3816	0.3816	Gnai2
GO:0043618	regulation of transcription from RNA polymerase II promoter in response to stress	48	1	0.48	1958	0.3816	0.3816	Tmbim6
GO:0021953	central nervous system neuron differentiation	133	2	1.32	1959	0.38236	0.38236	Rac1 / Ubb
GO:0034284	response to monosaccharide	133	2	1.32	1960	0.38236	0.38236	Sri / Ucp2
GO:0031400	negative regulation of protein modification process	502	6	4.99	1961	0.38279	0.38279	Bak1 / Dusp2 / Gnai2 / Pmepa1 / Pycard / Slc9a3r1
GO:2000147	positive regulation of cell motility	476	11	4.73	289	0.38418	0.008	Ccl4 / Ccl5 / Dapk2 / Glipr2 / Gnai2 / Lgals3 / Pycard / Rac1 / Rac2 / Spn / Tmsb4x
GO:0051147	regulation of muscle cell differentiation	134	2	1.33	1962	0.38589	0.38589	Hopx / Tmsb4x
GO:0051050	positive regulation of transport	820	14	8.16	491	0.38615	0.03381	Bak1 / Ccl3 / Ccl4 / Ccl5 / Cxcr3 / Cyba / Glrx / Gnai2 / Lgals3 / Prelid1 / Pycard / Slc9a3r1 / Sri / Vamp8
GO:0006511	ubiquitin-dependent protein catabolic process	504	6	5.01	1963	0.38636	0.38636	Derl1 / Psmb10 / Psmb3 / Psmb9 / Tbx21 / Ube2a
GO:0043902	positive regulation of multi-organism process	149	4	1.48	655	0.38671	0.06151	Cyba / Lgals1 / Pglyrp1 / Prf1
GO:0032964	collagen biosynthetic process	49	1	0.49	1964	0.38777	0.38777	Vim
GO:0019730	antimicrobial humoral response	49	1	0.49	1965	0.38777	0.38777	Pglyrp1
GO:2000179	positive regulation of neural precursor cell proliferation	49	1	0.49	1966	0.38777	0.38777	Gnai2
GO:0015914	phospholipid transport	49	1	0.49	1967	0.38777	0.38777	Prelid1
GO:0030837	negative regulation of actin filament polymerization	49	1	0.49	1968	0.38777	0.38777	Tmsb4x
GO:0032613	interleukin-10 production	49	1	0.49	1969	0.38777	0.38777	Pycard
GO:0048168	regulation of neuronal synaptic plasticity	49	1	0.49	1970	0.38777	0.38777	Rac1
GO:0009144	purine nucleoside triphosphate metabolic process	225	3	2.24	1971	0.38826	0.38826	Cox5b / Gimap7 / Uqcrc1
GO:0048469	cell maturation	135	2	1.34	1973	0.38942	0.38942	Id2 / Rac1
GO:0060548	negative regulation of cell death	888	10	8.83	1975	0.38966	0.38966	Ccl5 / Cxcr3 / Glrx / Gnai2 / Lgals3 / Plac8 / Prelid1 / Slc25a5 / Tmbim6 / Ucp2
GO:0051704	multi-organism process	1546	32	15.38	66	0.39377	4.2e-05	Bak1 / Ccl4 / Ccl5 / Cd52 / Cd6 / Cd8a / Cotl1 / Cyba / Eif3f / Gbp2 / Gzma / H2-K1 / H2-Q7 / Ifi27l2a / Irf7 / Isg20 / Lgals1 / Ly6a / Mx1 / Pglyrp1 / Pla2g16 / Plac8 / Prf1 / Psmb9 / Pycard / Rtp4 / Spn / Ubb / Ube2a / Vamp8 / Vim / Zbp1
GO:0006900	vesicle budding from membrane	50	1	0.5	1978	0.39388	0.39388	S100a10
GO:0050829	defense response to Gram-negative bacterium	50	1	0.5	1979	0.39388	0.39388	Pycard
GO:0033692	cellular polysaccharide biosynthetic process	50	1	0.5	1980	0.39388	0.39388	Ppp1ca
GO:0061951	establishment of protein localization to plasma membrane	50	1	0.5	1981	0.39388	0.39388	Sys1
GO:0055081	anion homeostasis	50	1	0.5	1982	0.39388	0.39388	Slc9a3r1
GO:0051049	regulation of transport	1480	23	14.72	401	0.39928	0.02034	Bak1 / Ccl3 / Ccl4 / Ccl5 / Clic1 / Cnn2 / Cxcr3 / Cyba / Fxyd5 / Glrx / Gnai2 / Lgals3 / Prelid1 / Pycard / Rac2 / Slc25a5 / Slc9a3r1 / Srgn / Sri / Tmbim6 / Ucp2 / Vamp8 / Wdr1
GO:2000134	negative regulation of G1/S transition of mitotic cell cycle	51	1	0.51	1983	0.39993	0.39993	Rpa2
GO:0055117	regulation of cardiac muscle contraction	51	1	0.51	1984	0.39993	0.39993	Sri
GO:0045661	regulation of myoblast differentiation	51	1	0.51	1985	0.39993	0.39993	Sra1
GO:0072698	protein localization to microtubule cytoskeleton	51	1	0.51	1986	0.39993	0.39993	Abhd17a
GO:0046128	purine ribonucleoside metabolic process	51	1	0.51	1987	0.39993	0.39993	Gimap7
GO:1903428	positive regulation of reactive oxygen species biosynthetic process	51	1	0.51	1988	0.39993	0.39993	Cyba
GO:0048584	positive regulation of response to stimulus	1736	35	17.27	58	0.40273	2.9e-05	Bak1 / Ccl3 / Ccl4 / Ccl5 / Cd6 / Cd8a / Csnk2b / Cxcr3 / Cyba / Dapk2 / Ddt / Glipr2 / Glrx / Gnai2 / H2-K1 / H2-Q6 / H2-Q7 / H2-T22 / Hopx / Irf7 / Lag3 / Lck / Lgals3 / Ppp1ca / Pycard / Rac1 / Rac2 / S100a13 / S100a4 / Slc9a3r1 / Sri / Tbx21 / Ubb / Vamp8 / Zbp1
GO:0050864	regulation of B cell activation	139	2	1.38	1990	0.40344	0.40344	Id2 / Tbx21
GO:0045807	positive regulation of endocytosis	139	2	1.38	1991	0.40344	0.40344	Cyba / Pycard
GO:1901653	cellular response to peptide	231	3	2.3	1992	0.40436	0.40436	Gnai2 / H2afz / Vim
GO:0043085	positive regulation of catalytic activity	918	15	9.13	517	0.40554	0.03965	Bak1 / Ccl3 / Ccl4 / Ccl5 / Cyba / Gnai2 / Ifi27l2a / Lat / Lck / Prelid1 / Pycard / Rac1 / Rhog / Rpa2 / S100a10
GO:0033209	tumor necrosis factor-mediated signaling pathway	52	1	0.52	1993	0.40592	0.40592	Pycard
GO:0032370	positive regulation of lipid transport	52	1	0.52	1994	0.40592	0.40592	Prelid1
GO:2000107	negative regulation of leukocyte apoptotic process	52	1	0.52	1995	0.40592	0.40592	Ccl5
GO:0050710	negative regulation of cytokine secretion	52	1	0.52	1996	0.40592	0.40592	Srgn
GO:0016447	somatic recombination of immunoglobulin gene segments	52	1	0.52	1997	0.40592	0.40592	Tbx21
GO:0055086	nucleobase-containing small molecule metabolic process	515	6	5.12	1998	0.40599	0.40599	Cnp / Cox5b / Gimap7 / Mdh2 / Tkt / Uqcrc1
GO:0071478	cellular response to radiation	140	2	1.39	1999	0.40692	0.40692	Bak1 / Crip1
GO:0050808	synapse organization	326	4	3.24	2000	0.40782	0.40782	Abhd17a / Dbnl / Srgn / Tuba1a
GO:0051272	positive regulation of cellular component movement	490	11	4.87	313	0.41082	0.00982	Ccl4 / Ccl5 / Dapk2 / Glipr2 / Gnai2 / Lgals3 / Pycard / Rac1 / Rac2 / Spn / Tmsb4x
GO:0032940	secretion by cell	819	14	8.15	486	0.41126	0.03351	Ccl3 / Ccl5 / Glrx / Gnai2 / Lat / Lgals3 / Pycard / Rac2 / S100a13 / Srgn / Sri / Tmbim6 / Ucp2 / Vamp8
GO:0002712	regulation of B cell mediated immunity	53	1	0.53	2002	0.41185	0.41185	Tbx21
GO:0002889	regulation of immunoglobulin mediated immune response	53	1	0.53	2003	0.41185	0.41185	Tbx21
GO:0014068	positive regulation of phosphatidylinositol 3-kinase signaling	53	1	0.53	2004	0.41185	0.41185	Ccl5
GO:0046626	regulation of insulin receptor signaling pathway	53	1	0.53	2005	0.41185	0.41185	Gnai2
GO:0043620	regulation of DNA-templated transcription in response to stress	53	1	0.53	2006	0.41185	0.41185	Tmbim6
GO:0006289	nucleotide-excision repair	53	1	0.53	2007	0.41185	0.41185	Rpa2
GO:0003229	ventricular cardiac muscle tissue development	53	1	0.53	2008	0.41185	0.41185	Id2
GO:0044773	mitotic DNA damage checkpoint	53	1	0.53	2009	0.41185	0.41185	Rpa2
GO:1903902	positive regulation of viral life cycle	53	1	0.53	2010	0.41185	0.41185	Lgals1
GO:0032677	regulation of interleukin-8 production	53	1	0.53	2011	0.41185	0.41185	Pycard
GO:0006081	cellular aldehyde metabolic process	53	1	0.53	2012	0.41185	0.41185	Tkt
GO:0055002	striated muscle cell development	142	2	1.41	2013	0.41385	0.41385	Actg1 / Wdr1
GO:0002682	regulation of immune system process	1120	35	11.14	6	0.41429	7.3e-10	Ccl3 / Ccl4 / Ccl5 / Cd48 / Cd6 / Ctla2a / Cxcr3 / Cyba / Dapk2 / Ddt / H2-K1 / H2-Q6 / H2-Q7 / H2-T22 / Icos / Id2 / Irf7 / Lag3 / Lat / Lck / Lgals1 / Lgals3 / Nmi / Pglyrp1 / Prelid1 / Pycard / Rac1 / Rac2 / Spn / Tap1 / Tbx21 / Tmbim6 / Trafd1 / Vamp8 / Zbp1
GO:0050920	regulation of chemotaxis	180	7	1.79	177	0.41461	0.00215	Ccl4 / Ccl5 / Cxcr3 / Dapk2 / Ddt / Rac1 / Rac2
GO:0009725	response to hormone	520	6	5.17	2014	0.41491	0.41491	Csnk2b / Glrx / Gnai2 / Gng2 / H2afz / Serpina3g
GO:0046631	alpha-beta T cell activation	143	2	1.42	2015	0.4173	0.4173	Spn / Tbx21
GO:0009743	response to carbohydrate	143	2	1.42	2016	0.4173	0.4173	Sri / Ucp2
GO:0050792	regulation of viral process	154	4	1.53	695	0.41756	0.06773	Ccl4 / Ccl5 / Isg20 / Lgals1
GO:0002088	lens development in camera-type eye	54	1	0.54	2017	0.41773	0.41773	Vim
GO:1903036	positive regulation of response to wounding	54	1	0.54	2018	0.41773	0.41773	Hopx
GO:0033627	cell adhesion mediated by integrin	54	1	0.54	2019	0.41773	0.41773	Ccl5
GO:0140238	presynaptic endocytosis	54	1	0.54	2020	0.41773	0.41773	Actg1
GO:0071156	regulation of cell cycle arrest	54	1	0.54	2021	0.41773	0.41773	Id2
GO:0045600	positive regulation of fat cell differentiation	54	1	0.54	2022	0.41773	0.41773	Id2
GO:0060350	endochondral bone morphogenesis	54	1	0.54	2023	0.41773	0.41773	Anxa6
GO:0048488	synaptic vesicle endocytosis	54	1	0.54	2024	0.41773	0.41773	Actg1
GO:0060191	regulation of lipase activity	54	1	0.54	2025	0.41773	0.41773	Ccl5
GO:0009891	positive regulation of biosynthetic process	1594	17	15.86	2026	0.41857	0.41857	Ccl3 / Ccl5 / Cxcr3 / Cyba / H2afz / Id2 / Irf7 / Plac8 / Rac1 / Rhog / Spn / Sra1 / Sub1 / Supt4a / Tbx21 / Tmsb4x / Vim
GO:0030036	actin cytoskeleton organization	566	13	5.63	225	0.4201	0.00425	Actg1 / Cnn2 / Pstpip1 / Pycard / Rac1 / Rac2 / Rhog / S100a10 / Slc9a3r1 / Tmsb4x / Vasp / Wdr1 / Zyx
GO:0051146	striated muscle cell differentiation	237	3	2.36	2028	0.42035	0.42035	Actg1 / Hopx / Wdr1
GO:0061351	neural precursor cell proliferation	144	2	1.43	2029	0.42074	0.42074	Gnai2 / Id2
GO:0006733	oxidoreduction coenzyme metabolic process	144	2	1.43	2030	0.42074	0.42074	Mdh2 / Tkt
GO:0007179	transforming growth factor beta receptor signaling pathway	144	2	1.43	2031	0.42074	0.42074	Pmepa1 / Zyx
GO:0044093	positive regulation of molecular function	1234	18	12.27	662	0.42279	0.06423	Bak1 / Ccl3 / Ccl4 / Ccl5 / Cyba / Derl1 / Glrx / Gnai2 / Ifi27l2a / Lat / Lck / Lgals3 / Prelid1 / Pycard / Rac1 / Rhog / Rpa2 / S100a10
GO:0006970	response to osmotic stress	55	1	0.55	2033	0.42354	0.42354	Rac1
GO:0042278	purine nucleoside metabolic process	55	1	0.55	2034	0.42354	0.42354	Gimap7
GO:0002027	regulation of heart rate	55	1	0.55	2035	0.42354	0.42354	Sri
GO:1902807	negative regulation of cell cycle G1/S phase transition	55	1	0.55	2036	0.42354	0.42354	Rpa2
GO:0006893	Golgi to plasma membrane transport	55	1	0.55	2037	0.42354	0.42354	Sys1
GO:0022029	telencephalon cell migration	55	1	0.55	2038	0.42354	0.42354	Rac1
GO:0071229	cellular response to acid chemical	145	2	1.44	2039	0.42418	0.42418	Gng2 / S100a10
GO:0010243	response to organonitrogen compound	622	7	6.19	2040	0.42445	0.42445	Derl1 / Gnai2 / Gng2 / H2afz / Serpina3g / Tmbim6 / Vim
GO:0010638	positive regulation of organelle organization	526	6	5.23	2041	0.42559	0.42559	Bak1 / Pycard / Rac1 / S100a10 / Vasp / Wdr1
GO:0044087	regulation of cellular component biogenesis	818	9	8.14	2044	0.42708	0.42708	Pmepa1 / Pycard / Rac1 / Rac2 / Rhog / S100a10 / Sub1 / Tmsb4x / Vasp
GO:0002381	immunoglobulin production involved in immunoglobulin mediated immune response	56	1	0.56	2045	0.42929	0.42929	Tbx21
GO:0060999	positive regulation of dendritic spine development	56	1	0.56	2046	0.42929	0.42929	Rac1
GO:0009141	nucleoside triphosphate metabolic process	241	3	2.4	2047	0.43093	0.43093	Cox5b / Gimap7 / Uqcrc1
GO:0071407	cellular response to organic cyclic compound	337	4	3.35	2048	0.43241	0.43241	Ccl5 / Glrx / Gng2 / H2afz
GO:0048729	tissue morphogenesis	530	6	5.27	2049	0.4327	0.4327	Csnk2b / Ppp1ca / Rac1 / Slc9a3r1 / Vasp / Wdr1
GO:0010950	positive regulation of endopeptidase activity	138	5	1.37	334	0.43328	0.01226	Bak1 / Ifi27l2a / Lck / Prelid1 / Pycard
GO:0140013	meiotic nuclear division	148	2	1.47	2050	0.43441	0.43441	Rpa2 / Ubb
GO:0044380	protein localization to cytoskeleton	57	1	0.57	2051	0.43499	0.43499	Abhd17a
GO:0030512	negative regulation of transforming growth factor beta receptor signaling pathway	57	1	0.57	2052	0.43499	0.43499	Pmepa1
GO:0045669	positive regulation of osteoblast differentiation	57	1	0.57	2053	0.43499	0.43499	Clic1
GO:0000271	polysaccharide biosynthetic process	57	1	0.57	2054	0.43499	0.43499	Ppp1ca
GO:0006821	chloride transport	57	1	0.57	2055	0.43499	0.43499	Clic1
GO:0051193	regulation of cofactor metabolic process	57	1	0.57	2056	0.43499	0.43499	Tmem14c
GO:0051155	positive regulation of striated muscle cell differentiation	57	1	0.57	2057	0.43499	0.43499	Hopx
GO:0097306	cellular response to alcohol	57	1	0.57	2058	0.43499	0.43499	Gng2
GO:0032637	interleukin-8 production	57	1	0.57	2059	0.43499	0.43499	Pycard
GO:0016445	somatic diversification of immunoglobulins	57	1	0.57	2060	0.43499	0.43499	Tbx21
GO:0043583	ear development	166	4	1.65	767	0.43799	0.08392	H2-K1 / Lrp10 / Rac1 / Slc9a3r1
GO:0007409	axonogenesis	340	4	3.38	2061	0.43907	0.43907	Cnp / Rac1 / Vasp / Vim
GO:0008637	apoptotic mitochondrial changes	102	4	1.01	385	0.4403	0.01884	Bak1 / Prelid1 / Pycard / Slc25a5
GO:0034637	cellular carbohydrate biosynthetic process	58	1	0.58	2062	0.44064	0.44064	Ppp1ca
GO:0021885	forebrain cell migration	58	1	0.58	2063	0.44064	0.44064	Rac1
GO:0006354	DNA-templated transcription, elongation	58	1	0.58	2064	0.44064	0.44064	Supt4a
GO:0090398	cellular senescence	58	1	0.58	2065	0.44064	0.44064	Id2
GO:0010633	negative regulation of epithelial cell migration	58	1	0.58	2066	0.44064	0.44064	Csnk2b
GO:0001649	osteoblast differentiation	150	2	1.49	2067	0.44117	0.44117	Clic1 / Id2
GO:0001667	ameboidal-type cell migration	341	4	3.39	2068	0.44129	0.44129	Anxa6 / Csnk2b / Glipr2 / Rac1
GO:0019725	cellular homeostasis	696	15	6.92	222	0.44172	0.00394	Anxa6 / Bak1 / Ccl3 / Ccl5 / Cd52 / Cxcr3 / Cxcr6 / Cyba / Glrx / Lck / Sh3bgrl3 / Slc9a3r1 / Sri / Tmbim6 / Ucp2
GO:0050793	regulation of developmental process	2132	30	21.21	452	0.44256	0.029	Ccl3 / Ccl5 / Clic1 / Ctla2a / Cxcr3 / Glipr2 / H2-K1 / Hopx / Id2 / Lck / Lgals1 / Lgals3 / Myl12a / Pglyrp1 / Pla2g16 / Plac8 / Prelid1 / Rac1 / Rhog / Rnh1 / S100a10 / S100a13 / Slc9a3r1 / Sra1 / Srgn / Tbx21 / Tmsb4x / Vim / Wdr1 / Zfp706
GO:0060047	heart contraction	151	2	1.5	2070	0.44454	0.44454	Hopx / Sri
GO:0043491	protein kinase B signaling	151	2	1.5	2071	0.44454	0.44454	Ccl5 / Slc9a3r1
GO:0043067	regulation of programmed cell death	1299	21	12.92	372	0.44554	0.01786	Bak1 / Ccl3 / Ccl5 / Cxcr3 / Dapk2 / Glrx / Gnai2 / Gzma / Ifi27l2a / Lck / Lgals3 / Plac8 / Ppp1ca / Prelid1 / Pycard / Slc25a5 / Slc9a3r1 / Sra1 / Tmbim6 / Ubb / Ucp2
GO:0051865	protein autoubiquitination	59	1	0.59	2072	0.44622	0.44622	Ube2a
GO:1903725	regulation of phospholipid metabolic process	59	1	0.59	2073	0.44622	0.44622	Rac1
GO:0006367	transcription initiation from RNA polymerase II promoter	59	1	0.59	2074	0.44622	0.44622	Sub1
GO:1903845	negative regulation of cellular response to transforming growth factor beta stimulus	59	1	0.59	2075	0.44622	0.44622	Pmepa1
GO:0002562	somatic diversification of immune receptors via germline recombination within a single locus	59	1	0.59	2076	0.44622	0.44622	Tbx21
GO:0042108	positive regulation of cytokine biosynthetic process	59	1	0.59	2077	0.44622	0.44622	Spn
GO:0006278	RNA-dependent DNA biosynthetic process	59	1	0.59	2078	0.44622	0.44622	Rpa2
GO:0007004	telomere maintenance via telomerase	59	1	0.59	2079	0.44622	0.44622	Rpa2
GO:2000514	regulation of CD4-positive, alpha-beta T cell activation	59	1	0.59	2080	0.44622	0.44622	Tbx21
GO:1901224	positive regulation of NIK/NF-kappaB signaling	59	1	0.59	2081	0.44622	0.44622	Glrx
GO:0050906	detection of stimulus involved in sensory perception	59	1	0.59	2082	0.44622	0.44622	Rtp4
GO:0016444	somatic cell DNA recombination	59	1	0.59	2083	0.44622	0.44622	Tbx21
GO:0006869	lipid transport	247	3	2.46	2084	0.44666	0.44666	Lrp10 / Prelid1 / Slco3a1
GO:0043434	response to peptide hormone	247	3	2.46	2085	0.44666	0.44666	Gnai2 / H2afz / Serpina3g
GO:0000082	G1/S transition of mitotic cell cycle	152	2	1.51	2086	0.4479	0.4479	Id2 / Rpa2
GO:0043409	negative regulation of MAPK cascade	152	2	1.51	2087	0.4479	0.4479	Dusp2 / Slc9a3r1
GO:0006914	autophagy	344	4	3.42	2088	0.44792	0.44792	Ctsd / Pycard / Tmbim6 / Vamp8
GO:0061919	process utilizing autophagic mechanism	344	4	3.42	2089	0.44792	0.44792	Ctsd / Pycard / Tmbim6 / Vamp8
GO:0050853	B cell receptor signaling pathway	60	1	0.6	2091	0.45175	0.45175	Lck
GO:0050805	negative regulation of synaptic transmission	60	1	0.6	2092	0.45175	0.45175	Gnai2
GO:0015844	monoamine transport	60	1	0.6	2093	0.45175	0.45175	Lgals3
GO:0060359	response to ammonium ion	60	1	0.6	2094	0.45175	0.45175	Gnai2
GO:0022600	digestive system process	60	1	0.6	2095	0.45175	0.45175	Vamp8
GO:0030163	protein catabolic process	776	11	7.72	1185	0.4542	0.15029	Abhd17a / Ctsd / Ctsw / Derl1 / Gzma / Psmb10 / Psmb3 / Psmb9 / Tbx21 / Ubb / Ube2a
GO:0099173	postsynapse organization	154	2	1.53	2096	0.45457	0.45457	Abhd17a / Srgn
GO:0055001	muscle cell development	154	2	1.53	2097	0.45457	0.45457	Actg1 / Wdr1
GO:0006942	regulation of striated muscle contraction	61	1	0.61	2099	0.45723	0.45723	Sri
GO:2000779	regulation of double-strand break repair	61	1	0.61	2100	0.45723	0.45723	Rpa2
GO:0044774	mitotic DNA integrity checkpoint	61	1	0.61	2101	0.45723	0.45723	Rpa2
GO:0051145	smooth muscle cell differentiation	61	1	0.61	2102	0.45723	0.45723	Tmsb4x
GO:0097194	execution phase of apoptosis	61	1	0.61	2103	0.45723	0.45723	Cxcr3
GO:0050851	antigen receptor-mediated signaling pathway	155	2	1.54	2104	0.45789	0.45789	Lck / Lgals3
GO:0097485	neuron projection guidance	155	2	1.54	2105	0.45789	0.45789	Rac1 / Vasp
GO:0007411	axon guidance	155	2	1.54	2106	0.45789	0.45789	Rac1 / Vasp
GO:0051341	regulation of oxidoreductase activity	67	3	0.67	454	0.45809	0.02908	Cyba / Gnai2 / Gzma
GO:0001932	regulation of protein phosphorylation	1163	17	11.57	701	0.4589	0.06997	Bak1 / Ccl3 / Ccl4 / Ccl5 / Cd6 / Csnk2b / Ddt / Dusp2 / Glipr2 / Gnai2 / Lat / Lck / Pmepa1 / Pycard / Rac1 / Slc9a3r1 / Spn
GO:0006887	exocytosis	296	6	2.94	714	0.4605	0.07534	Ccl5 / Glrx / Gnai2 / Lat / Rac2 / Vamp8
GO:0001817	regulation of cytokine production	560	15	5.57	107	0.46116	0.00046	Ccl3 / Ccl4 / Ccl5 / Cd6 / Cyba / Ddt / Irf7 / Lag3 / Nmi / Pglyrp1 / Pycard / Rac1 / Spn / Srgn / Tbx21
GO:0032869	cellular response to insulin stimulus	156	2	1.55	2108	0.4612	0.4612	Gnai2 / H2afz
GO:1901655	cellular response to ketone	62	1	0.62	2110	0.46265	0.46265	Gng2
GO:1901019	regulation of calcium ion transmembrane transporter activity	62	1	0.62	2111	0.46265	0.46265	Sri
GO:0006911	phagocytosis, engulfment	62	1	0.62	2112	0.46265	0.46265	Rac1
GO:0050886	endocrine process	62	1	0.62	2113	0.46265	0.46265	Cyba
GO:0032272	negative regulation of protein polymerization	62	1	0.62	2114	0.46265	0.46265	Tmsb4x
GO:1900076	regulation of cellular response to insulin stimulus	62	1	0.62	2115	0.46265	0.46265	Gnai2
GO:0043407	negative regulation of MAP kinase activity	62	1	0.62	2116	0.46265	0.46265	Dusp2
GO:0032606	type I interferon production	77	3	0.77	524	0.46364	0.04136	Irf7 / Nmi / Pycard
GO:0002252	immune effector process	617	26	6.14	5	0.46623	3.6e-10	Ccl5 / Cd8a / Gzmb / H2-K1 / H2-Q6 / H2-Q7 / H2-T22 / Irf7 / Isg20 / Lag3 / Lat / Lgals1 / Lgals3 / Mx1 / Pglyrp1 / Prf1 / Pycard / Rac2 / Rtp4 / Spn / Tap1 / Tbx21 / Tmbim6 / Vamp8 / Wdr1 / Zbp1
GO:0008283	cell proliferation	1634	24	16.25	478	0.46664	0.03251	Bak1 / Ccl5 / Cd6 / Cnn2 / Cxcr3 / Cyba / Gnai2 / Gng2 / Id2 / Jaml / Lgals3 / Plac8 / Psmb10 / Pycard / Rac1 / Rac2 / S100a13 / Sdcbp2 / Slc25a5 / Slc9a3r1 / Spn / Sra1 / Ube2a / Vim
GO:0007200	phospholipase C-activating G protein-coupled receptor signaling pathway	63	1	0.63	2117	0.46802	0.46802	Slc9a3r1
GO:0042130	negative regulation of T cell proliferation	63	1	0.63	2118	0.46802	0.46802	Spn
GO:0009119	ribonucleoside metabolic process	63	1	0.63	2119	0.46802	0.46802	Gimap7
GO:0005977	glycogen metabolic process	63	1	0.63	2120	0.46802	0.46802	Ppp1ca
GO:0001656	metanephros development	63	1	0.63	2121	0.46802	0.46802	Id2
GO:0006073	cellular glucan metabolic process	63	1	0.63	2122	0.46802	0.46802	Ppp1ca
GO:0044042	glucan metabolic process	63	1	0.63	2123	0.46802	0.46802	Ppp1ca
GO:0010770	positive regulation of cell morphogenesis involved in differentiation	159	2	1.58	2124	0.47106	0.47106	Rac1 / S100a10
GO:0008625	extrinsic apoptotic signaling pathway via death domain receptors	64	1	0.64	2125	0.47333	0.47333	Lgals3
GO:0015908	fatty acid transport	64	1	0.64	2126	0.47333	0.47333	Slco3a1
GO:0046637	regulation of alpha-beta T cell differentiation	64	1	0.64	2127	0.47333	0.47333	Tbx21
GO:0070613	regulation of protein processing	64	1	0.64	2128	0.47333	0.47333	Ctla2a
GO:0036465	synaptic vesicle recycling	64	1	0.64	2129	0.47333	0.47333	Actg1
GO:0030433	ubiquitin-dependent ERAD pathway	64	1	0.64	2130	0.47333	0.47333	Derl1
GO:0010952	positive regulation of peptidase activity	146	5	1.45	353	0.47608	0.01532	Bak1 / Ifi27l2a / Lck / Prelid1 / Pycard
GO:0002688	regulation of leukocyte chemotaxis	100	6	0.99	112	0.47763	0.00048	Ccl4 / Ccl5 / Dapk2 / Ddt / Rac1 / Rac2
GO:0019693	ribose phosphate metabolic process	358	4	3.56	2131	0.47854	0.47854	Cox5b / Gimap7 / Tkt / Uqcrc1
GO:1903201	regulation of oxidative stress-induced cell death	65	1	0.65	2132	0.47859	0.47859	Glrx
GO:0030203	glycosaminoglycan metabolic process	65	1	0.65	2133	0.47859	0.47859	Pglyrp1
GO:0030500	regulation of bone mineralization	65	1	0.65	2134	0.47859	0.47859	Srgn
GO:0015748	organophosphate ester transport	65	1	0.65	2135	0.47859	0.47859	Prelid1
GO:0060411	cardiac septum morphogenesis	65	1	0.65	2136	0.47859	0.47859	Id2
GO:0003073	regulation of systemic arterial blood pressure	65	1	0.65	2137	0.47859	0.47859	Cyba
GO:0002200	somatic diversification of immune receptors	65	1	0.65	2138	0.47859	0.47859	Tbx21
GO:1903522	regulation of blood circulation	162	2	1.61	2140	0.48082	0.48082	Hopx / Sri
GO:0030324	lung development	162	2	1.61	2141	0.48082	0.48082	Hopx / Ppp1ca
GO:0051246	regulation of protein metabolic process	2219	29	22.07	705	0.48115	0.07119	Bak1 / Ccl3 / Ccl4 / Ccl5 / Cd6 / Csnk2b / Ctla2a / Ddt / Derl1 / Dusp2 / Glipr2 / Gnai2 / Ifi27l2a / Lag3 / Lat / Lck / Nmi / Pmepa1 / Ppp1ca / Prelid1 / Psmb9 / Pycard / Rac1 / Serpina3g / Slc9a3r1 / Spn / Ubb / Vim / Zfp706
GO:0043200	response to amino acid	66	1	0.66	2142	0.4838	0.4838	Tmbim6
GO:0010923	negative regulation of phosphatase activity	66	1	0.66	2143	0.4838	0.4838	Gnai2
GO:0006112	energy reserve metabolic process	66	1	0.66	2144	0.4838	0.4838	Ppp1ca
GO:0007586	digestion	66	1	0.66	2145	0.4838	0.4838	Vamp8
GO:1903317	regulation of protein maturation	66	1	0.66	2146	0.4838	0.4838	Ctla2a
GO:0021761	limbic system development	66	1	0.66	2147	0.4838	0.4838	Ubb
GO:0050731	positive regulation of peptidyl-tyrosine phosphorylation	163	2	1.62	2148	0.48404	0.48404	Ccl5 / Lck
GO:0007568	aging	163	2	1.62	2149	0.48404	0.48404	Id2 / Ifi27l2a
GO:0031328	positive regulation of cellular biosynthetic process	1559	16	15.51	2150	0.48683	0.48683	Ccl3 / Ccl5 / Cxcr3 / H2afz / Id2 / Irf7 / Plac8 / Rac1 / Rhog / Spn / Sra1 / Sub1 / Supt4a / Tbx21 / Tmsb4x / Vim
GO:0050804	modulation of chemical synaptic transmission	362	4	3.6	2151	0.48718	0.48718	Csnk2b / Gnai2 / Rac1 / Srgn
GO:0030323	respiratory tube development	164	2	1.63	2152	0.48726	0.48726	Hopx / Ppp1ca
GO:0046888	negative regulation of hormone secretion	67	1	0.67	2153	0.48896	0.48896	Ucp2
GO:0018958	phenol-containing compound metabolic process	67	1	0.67	2154	0.48896	0.48896	Ddt
GO:0014032	neural crest cell development	67	1	0.67	2155	0.48896	0.48896	Anxa6
GO:0003281	ventricular septum development	67	1	0.67	2156	0.48896	0.48896	Id2
GO:0061180	mammary gland epithelium development	67	1	0.67	2157	0.48896	0.48896	Id2
GO:0070373	negative regulation of ERK1 and ERK2 cascade	67	1	0.67	2158	0.48896	0.48896	Slc9a3r1
GO:1901796	regulation of signal transduction by p53 class mediator	67	1	0.67	2159	0.48896	0.48896	Ubb
GO:0140056	organelle localization by membrane tethering	67	1	0.67	2160	0.48896	0.48896	Vamp8
GO:0099177	regulation of trans-synaptic signaling	363	4	3.61	2161	0.48933	0.48933	Csnk2b / Gnai2 / Rac1 / Srgn
GO:0044843	cell cycle G1/S phase transition	165	2	1.64	2162	0.49046	0.49046	Id2 / Rpa2
GO:1903046	meiotic cell cycle process	166	2	1.65	2163	0.49365	0.49365	Rpa2 / Ubb
GO:0016575	histone deacetylation	68	1	0.68	2164	0.49407	0.49407	Hopx
GO:0032729	positive regulation of interferon-gamma production	68	1	0.68	2165	0.49407	0.49407	Pycard
GO:0051235	maintenance of location	265	7	2.64	365	0.49411	0.01678	Anxa6 / Cxcr3 / Cyba / Lck / Srgn / Sri / Tmsb4x
GO:0051603	proteolysis involved in cellular protein catabolic process	600	9	5.97	1143	0.49566	0.14399	Ctsw / Derl1 / Gzma / Psmb10 / Psmb3 / Psmb9 / Tbx21 / Ubb / Ube2a
GO:0070372	regulation of ERK1 and ERK2 cascade	260	8	2.59	229	0.49629	0.00449	Ccl3 / Ccl4 / Ccl5 / Ddt / Glipr2 / Gnai2 / Pycard / Slc9a3r1
GO:0030162	regulation of proteolysis	557	9	5.54	894	0.49653	0.10385	Bak1 / Ctla2a / Ifi27l2a / Lck / Prelid1 / Psmb9 / Pycard / Serpina3g / Ubb
GO:0009056	catabolic process	1827	21	18.17	1637	0.4974	0.27192	Abhd17a / Cnp / Ctsd / Ctsw / Derl1 / Gzma / Isg20 / Pglyrp1 / Pla2g16 / Pld3 / Ppp1ca / Psmb10 / Psmb3 / Psmb9 / Pycard / Tbx21 / Tmbim6 / Ubb / Ube2a / Vamp8 / Vim
GO:0009653	anatomical structure morphogenesis	2098	26	20.87	1103	0.4991	0.13616	Actg1 / Anxa6 / Bak1 / Ccl3 / Ccl5 / Cnp / Csnk2b / Cxcr3 / Dbnl / Hopx / Id2 / Lgals3 / Myl12a / Ppp1ca / Psmb10 / Rac1 / Rac2 / Rhog / Rnh1 / S100a10 / S100a13 / Slc9a3r1 / Ubb / Vasp / Vim / Wdr1
GO:0032088	negative regulation of NF-kappaB transcription factor activity	69	1	0.69	2166	0.49913	0.49913	Pycard
GO:0072384	organelle transport along microtubule	69	1	0.69	2167	0.49913	0.49913	Ubb
GO:1905954	positive regulation of lipid localization	69	1	0.69	2168	0.49913	0.49913	Prelid1
GO:0046717	acid secretion	69	1	0.69	2169	0.49913	0.49913	Slc9a3r1
GO:0048525	negative regulation of viral process	79	3	0.79	537	0.49947	0.04408	Ccl4 / Ccl5 / Isg20
GO:0007626	locomotory behavior	168	2	1.67	2170	0.49999	0.49999	Cnp / Id2
GO:0022607	cellular component assembly	2355	26	23.42	1781	0.50056	0.312	Actg1 / Anxa6 / Ccl5 / Cd3d / Clta / Ctsd / Cyba / Dbnl / Derl1 / Hopx / Mx1 / Pmepa1 / Prf1 / Pstpip1 / Pycard / Rac1 / Rac2 / Rhog / S100a10 / Slc9a3r1 / Sub1 / Tmsb4x / Vamp8 / Vasp / Wdr1 / Zyx
GO:1901575	organic substance catabolic process	1525	18	15.17	1586	0.50238	0.25561	Abhd17a / Cnp / Ctsd / Ctsw / Derl1 / Gzma / Isg20 / Pglyrp1 / Pla2g16 / Pld3 / Ppp1ca / Psmb10 / Psmb3 / Psmb9 / Tbx21 / Ubb / Ube2a / Vim
GO:0016485	protein processing	184	4	1.83	955	0.50244	0.11141	Bak1 / Ctla2a / Pycard / Srgn
GO:0007010	cytoskeleton organization	1127	18	11.21	470	0.50269	0.03076	Actg1 / Cnn2 / Cnp / Dctn6 / Lsp1 / Pstpip1 / Pycard / Rac1 / Rac2 / Rhog / S100a10 / Slc9a3r1 / Tmsb4x / Tuba1a / Vasp / Vim / Wdr1 / Zyx
GO:0008285	negative regulation of cell proliferation	570	6	5.67	2171	0.50273	0.50273	Bak1 / Cxcr3 / Id2 / Lgals3 / Slc9a3r1 / Spn
GO:0032507	maintenance of protein location in cell	70	1	0.7	2172	0.50413	0.50413	Tmsb4x
GO:0010942	positive regulation of cell death	608	13	6.05	286	0.50498	0.00763	Bak1 / Ccl3 / Ccl5 / Cxcr3 / Gzma / Ifi27l2a / Lck / Ppp1ca / Prelid1 / Pycard / Slc9a3r1 / Ubb / Ucp2
GO:0000209	protein polyubiquitination	170	2	1.69	2173	0.50628	0.50628	Nmi / Ube2a
GO:0010648	negative regulation of cell communication	1103	13	10.97	1765	0.50773	0.30295	Ccl5 / Dusp2 / Glrx / Gnai2 / Lgals3 / Pmepa1 / Prelid1 / Pycard / Slc25a5 / Slc9a3r1 / Sri / Tmbim6 / Ucp2
GO:0061564	axon development	372	4	3.7	2174	0.50851	0.50851	Cnp / Rac1 / Vasp / Vim
GO:0006820	anion transport	372	4	3.7	2175	0.50851	0.50851	Clic1 / Prelid1 / Slc9a3r1 / Slco3a1
GO:0002718	regulation of cytokine production involved in immune response	71	1	0.71	2176	0.50909	0.50909	Tbx21
GO:0043525	positive regulation of neuron apoptotic process	71	1	0.71	2177	0.50909	0.50909	Ccl3
GO:0014031	mesenchymal cell development	71	1	0.71	2178	0.50909	0.50909	Anxa6
GO:0099024	plasma membrane invagination	71	1	0.71	2179	0.50909	0.50909	Rac1
GO:0090630	activation of GTPase activity	71	1	0.71	2180	0.50909	0.50909	Rhog
GO:0090092	regulation of transmembrane receptor protein serine/threonine kinase signaling pathway	171	2	1.7	2181	0.5094	0.5094	Csnk2b / Pmepa1
GO:0032879	regulation of localization	2213	35	22.01	206	0.50987	0.00297	Abhd17a / Anxa6 / Bak1 / Ccl3 / Ccl4 / Ccl5 / Clic1 / Cnn2 / Csnk2b / Cxcr3 / Cyba / Dapk2 / Ddt / Fxyd5 / Glipr2 / Glrx / Gnai2 / Lck / Lgals3 / Prelid1 / Pycard / Rac1 / Rac2 / Rhog / Slc25a5 / Slc9a3r1 / Spn / Srgn / Sri / Tmbim6 / Tmsb4x / Ucp2 / Vamp8 / Vim / Wdr1
GO:0001819	positive regulation of cytokine production	366	9	3.64	325	0.51216	0.01096	Ccl3 / Ccl4 / Ccl5 / Cd6 / Cyba / Ddt / Irf7 / Pycard / Spn
GO:0023057	negative regulation of signaling	1107	13	11.01	1770	0.51274	0.30746	Ccl5 / Dusp2 / Glrx / Gnai2 / Lgals3 / Pmepa1 / Prelid1 / Pycard / Slc25a5 / Slc9a3r1 / Sri / Tmbim6 / Ucp2
GO:0007005	mitochondrion organization	424	7	4.22	1065	0.51312	0.13042	Bak1 / Cnp / Dctn6 / Mx1 / Prelid1 / Pycard / Slc25a5
GO:1901698	response to nitrogen compound	677	7	6.73	2182	0.5132	0.5132	Derl1 / Gnai2 / Gng2 / H2afz / Serpina3g / Tmbim6 / Vim
GO:0014033	neural crest cell differentiation	72	1	0.72	2183	0.51399	0.51399	Anxa6
GO:0048864	stem cell development	72	1	0.72	2184	0.51399	0.51399	Anxa6
GO:0022406	membrane docking	72	1	0.72	2185	0.51399	0.51399	Vamp8
GO:0010833	telomere maintenance via telomere lengthening	72	1	0.72	2186	0.51399	0.51399	Rpa2
GO:0032543	mitochondrial translation	72	1	0.72	2187	0.51399	0.51399	Mrps16
GO:0046785	microtubule polymerization	72	1	0.72	2188	0.51399	0.51399	Rac1
GO:1901879	regulation of protein depolymerization	72	1	0.72	2189	0.51399	0.51399	Wdr1
GO:0010498	proteasomal protein catabolic process	405	7	4.03	948	0.5141	0.10964	Derl1 / Psmb10 / Psmb3 / Psmb9 / Tbx21 / Ubb / Ube2a
GO:1903829	positive regulation of cellular protein localization	274	3	2.73	2190	0.51514	0.51514	Abhd17a / Lgals3 / Rhog
GO:2000377	regulation of reactive oxygen species metabolic process	173	2	1.72	2191	0.51562	0.51562	Cyba / Gnai2
GO:0043903	regulation of symbiosis, encompassing mutualism through parasitism	185	4	1.84	958	0.51767	0.11304	Ccl4 / Ccl5 / Isg20 / Lgals1
GO:0019637	organophosphate metabolic process	781	8	7.77	2192	0.51786	0.51786	Cnp / Cox5b / Gimap7 / Mdh2 / Pla2g16 / Rac1 / Tkt / Uqcrc1
GO:0001666	response to hypoxia	174	2	1.73	2193	0.51871	0.51871	Tmbim6 / Ucp2
GO:0010557	positive regulation of macromolecule biosynthetic process	1488	15	14.8	2194	0.51872	0.51872	Ccl3 / Cxcr3 / H2afz / Id2 / Irf7 / Plac8 / Rac1 / Rhog / Spn / Sra1 / Sub1 / Supt4a / Tbx21 / Tmsb4x / Vim
GO:0040014	regulation of multicellular organism growth	73	1	0.73	2195	0.51885	0.51885	Plac8
GO:0031110	regulation of microtubule polymerization or depolymerization	73	1	0.73	2196	0.51885	0.51885	Rac1
GO:0051289	protein homotetramerization	73	1	0.73	2197	0.51885	0.51885	Vasp
GO:0006641	triglyceride metabolic process	73	1	0.73	2198	0.51885	0.51885	Pla2g16
GO:0006469	negative regulation of protein kinase activity	175	2	1.74	2199	0.52178	0.52178	Dusp2 / Pycard
GO:0009968	negative regulation of signal transduction	1012	12	10.07	1769	0.52196	0.30619	Ccl5 / Dusp2 / Glrx / Gnai2 / Lgals3 / Pmepa1 / Prelid1 / Pycard / Slc25a5 / Slc9a3r1 / Sri / Tmbim6
GO:0048762	mesenchymal cell differentiation	176	2	1.75	2200	0.52484	0.52484	Anxa6 / Glipr2
GO:0008361	regulation of cell size	176	2	1.75	2201	0.52484	0.52484	Rac1 / Slc9a3r1
GO:0001894	tissue homeostasis	176	2	1.75	2202	0.52484	0.52484	Rac1 / Rac2
GO:0030900	forebrain development	278	3	2.77	2203	0.52491	0.52491	Id2 / Rac1 / Ubb
GO:0071417	cellular response to organonitrogen compound	380	4	3.78	2204	0.52529	0.52529	Gnai2 / Gng2 / H2afz / Vim
GO:0042060	wound healing	279	3	2.78	2205	0.52733	0.52733	Cnn2 / Hopx / Jaml
GO:0032945	negative regulation of mononuclear cell proliferation	75	1	0.75	2206	0.52843	0.52843	Spn
GO:0006939	smooth muscle contraction	75	1	0.75	2207	0.52843	0.52843	Lck
GO:0006906	vesicle fusion	75	1	0.75	2208	0.52843	0.52843	Vamp8
GO:0050672	negative regulation of lymphocyte proliferation	75	1	0.75	2209	0.52843	0.52843	Spn
GO:0043488	regulation of mRNA stability	75	1	0.75	2210	0.52843	0.52843	Vim
GO:0070167	regulation of biomineral tissue development	75	1	0.75	2211	0.52843	0.52843	Srgn
GO:1900407	regulation of cellular response to oxidative stress	75	1	0.75	2212	0.52843	0.52843	Glrx
GO:2000106	regulation of leukocyte apoptotic process	91	3	0.91	656	0.52852	0.06223	Ccl5 / Lgals3 / Prelid1
GO:0010876	lipid localization	280	3	2.79	2213	0.52975	0.52975	Lrp10 / Prelid1 / Slco3a1
GO:0051641	cellular localization	2215	30	22.03	542	0.53047	0.04527	Abhd17a / Actg1 / Bak1 / Clta / Cox5b / Cxcr3 / Cyba / Derl1 / Gbp2 / Lat / Lck / Lgals3 / Myl12a / Rac1 / Rac2 / Rhog / Rpa2 / Rtp4 / S100a10 / Slc9a3r1 / Srgn / Sri / Sys1 / Tap1 / Tmbim6 / Tmsb4x / Ubb / Ucp2 / Vamp8 / Zdhhc18
GO:0036293	response to decreased oxygen levels	178	2	1.77	2214	0.53093	0.53093	Tmbim6 / Ucp2
GO:0071560	cellular response to transforming growth factor beta stimulus	178	2	1.77	2215	0.53093	0.53093	Pmepa1 / Zyx
GO:0000904	cell morphogenesis involved in differentiation	610	8	6.07	1608	0.53224	0.26184	Cnp / Id2 / Rac1 / S100a10 / Slc9a3r1 / Vasp / Vim / Wdr1
GO:0031401	positive regulation of protein modification process	1010	15	10.05	749	0.53329	0.07731	Ccl3 / Ccl4 / Ccl5 / Cd6 / Csnk2b / Ddt / Derl1 / Glipr2 / Gnai2 / Lat / Lck / Nmi / Pycard / Rac1 / Spn
GO:0031396	regulation of protein ubiquitination	179	2	1.78	2216	0.53395	0.53395	Derl1 / Nmi
GO:0002429	immune response-activating cell surface receptor signaling pathway	179	2	1.78	2217	0.53395	0.53395	Lck / Lgals3
GO:0010628	positive regulation of gene expression	1605	16	15.96	2218	0.53588	0.53588	Ccl3 / Ccl5 / Cnn2 / Cxcr3 / H2afz / Id2 / Irf7 / Lck / Plac8 / Rhog / Sra1 / Sub1 / Supt4a / Tbx21 / Tmsb4x / Vim
GO:0032268	regulation of cellular protein metabolic process	2064	27	20.53	760	0.53622	0.07993	Bak1 / Ccl3 / Ccl4 / Ccl5 / Cd6 / Csnk2b / Ctla2a / Ddt / Derl1 / Dusp2 / Glipr2 / Gnai2 / Ifi27l2a / Lat / Lck / Nmi / Pmepa1 / Ppp1ca / Prelid1 / Pycard / Rac1 / Serpina3g / Slc9a3r1 / Spn / Ubb / Vim / Zfp706
GO:0021537	telencephalon development	180	2	1.79	2219	0.53696	0.53696	Id2 / Rac1
GO:0002824	positive regulation of adaptive immune response based on somatic recombination of immune receptors built from immunoglobulin superfamily domains	110	5	1.09	237	0.53765	0.00482	H2-K1 / H2-Q6 / H2-Q7 / H2-T22 / Tbx21
GO:0032414	positive regulation of ion transmembrane transporter activity	77	1	0.77	2220	0.53781	0.53781	Glrx
GO:0070664	negative regulation of leukocyte proliferation	77	1	0.77	2221	0.53781	0.53781	Spn
GO:0010717	regulation of epithelial to mesenchymal transition	77	1	0.77	2222	0.53781	0.53781	Glipr2
GO:0070301	cellular response to hydrogen peroxide	77	1	0.77	2223	0.53781	0.53781	Glrx
GO:0045595	regulation of cell differentiation	1508	19	15	1252	0.53803	0.16753	Ccl3 / Ccl5 / Clic1 / Ctla2a / Glipr2 / H2-K1 / Hopx / Id2 / Lck / Lgals1 / Pglyrp1 / Prelid1 / Rac1 / S100a10 / Sra1 / Tbx21 / Tmsb4x / Vim / Wdr1
GO:0015711	organic anion transport	284	3	2.82	2224	0.53936	0.53936	Prelid1 / Slc9a3r1 / Slco3a1
GO:0051052	regulation of DNA metabolic process	388	4	3.86	2225	0.5418	0.5418	Gzma / Rac1 / Rpa2 / Tbx21
GO:0010324	membrane invagination	78	1	0.78	2226	0.54243	0.54243	Rac1
GO:0035304	regulation of protein dephosphorylation	78	1	0.78	2227	0.54243	0.54243	Gnai2
GO:0048524	positive regulation of viral process	78	1	0.78	2228	0.54243	0.54243	Lgals1
GO:0032868	response to insulin	182	2	1.81	2229	0.54293	0.54293	Gnai2 / H2afz
GO:0071559	response to transforming growth factor beta	182	2	1.81	2230	0.54293	0.54293	Pmepa1 / Zyx
GO:0010769	regulation of cell morphogenesis involved in differentiation	286	3	2.84	2231	0.54412	0.54412	Rac1 / S100a10 / Vim
GO:0006417	regulation of translation	287	3	2.85	2232	0.54649	0.54649	Ppp1ca / Vim / Zfp706
GO:0035305	negative regulation of dephosphorylation	79	1	0.79	2233	0.54701	0.54701	Gnai2
GO:0009116	nucleoside metabolic process	79	1	0.79	2234	0.54701	0.54701	Gimap7
GO:0098876	vesicle-mediated transport to the plasma membrane	79	1	0.79	2235	0.54701	0.54701	Sys1
GO:0006022	aminoglycan metabolic process	79	1	0.79	2236	0.54701	0.54701	Pglyrp1
GO:0001934	positive regulation of protein phosphorylation	808	13	8.04	648	0.54795	0.05912	Ccl3 / Ccl4 / Ccl5 / Cd6 / Csnk2b / Ddt / Glipr2 / Gnai2 / Lat / Lck / Pycard / Rac1 / Spn
GO:0048666	neuron development	931	11	9.26	1801	0.5485	0.32172	Cnp / Dbnl / H2-K1 / Id2 / Lgals1 / Rac1 / Rac2 / Slc9a3r1 / Ubb / Vasp / Vim
GO:0032984	protein-containing complex disassembly	184	2	1.83	2238	0.54886	0.54886	Vamp8 / Wdr1
GO:0010821	regulation of mitochondrion organization	124	4	1.23	495	0.54949	0.03525	Bak1 / Prelid1 / Pycard / Slc25a5
GO:0001938	positive regulation of endothelial cell proliferation	80	1	0.8	2239	0.55154	0.55154	Cyba
GO:0043535	regulation of blood vessel endothelial cell migration	80	1	0.8	2240	0.55154	0.55154	Csnk2b
GO:0045778	positive regulation of ossification	80	1	0.8	2241	0.55154	0.55154	Clic1
GO:0140029	exocytic process	80	1	0.8	2242	0.55154	0.55154	Vamp8
GO:0043255	regulation of carbohydrate biosynthetic process	80	1	0.8	2243	0.55154	0.55154	Ppp1ca
GO:0016236	macroautophagy	185	2	1.84	2244	0.5518	0.5518	Ctsd / Vamp8
GO:0060541	respiratory system development	185	2	1.84	2245	0.5518	0.5518	Hopx / Ppp1ca
GO:0006898	receptor-mediated endocytosis	185	2	1.84	2246	0.5518	0.5518	Clta / Dbnl
GO:0002683	negative regulation of immune system process	412	11	4.1	199	0.55359	0.00275	Ddt / Id2 / Lag3 / Lgals3 / Nmi / Pglyrp1 / Spn / Tap1 / Tbx21 / Tmbim6 / Trafd1
GO:0042493	response to drug	601	6	5.98	2247	0.55491	0.55491	Ccl4 / Glrx / Gnai2 / Lck / Tmbim6 / Vim
GO:0001816	cytokine production	626	17	6.23	80	0.55515	0.00016	Ccl3 / Ccl4 / Ccl5 / Cd6 / Cxcr3 / Cyba / Ddt / Irf7 / Lag3 / Nmi / Pglyrp1 / Pycard / Rac1 / S100a13 / Spn / Srgn / Tbx21
GO:0001959	regulation of cytokine-mediated signaling pathway	93	3	0.93	671	0.55567	0.06554	Irf7 / Pycard / Zbp1
GO:0001503	ossification	291	3	2.89	2248	0.5559	0.5559	Clic1 / Id2 / Srgn
GO:0090174	organelle membrane fusion	81	1	0.81	2249	0.55602	0.55602	Vamp8
GO:0044264	cellular polysaccharide metabolic process	81	1	0.81	2250	0.55602	0.55602	Ppp1ca
GO:0035637	multicellular organismal signaling	81	1	0.81	2251	0.55602	0.55602	Sri
GO:0002706	regulation of lymphocyte mediated immunity	154	8	1.53	79	0.55713	0.00015	H2-K1 / H2-Q6 / H2-Q7 / H2-T22 / Lag3 / Spn / Tap1 / Tbx21
GO:0048585	negative regulation of response to stimulus	1320	21	13.13	404	0.55915	0.02096	Ccl5 / Ctla2a / Ddt / Dusp2 / Glrx / Gnai2 / Lgals3 / Nmi / Pglyrp1 / Pmepa1 / Prelid1 / Pycard / Slc25a5 / Slc9a3r1 / Spn / Sri / Tap1 / Tbx21 / Tmbim6 / Trafd1 / Ucp2
GO:0070371	ERK1 and ERK2 cascade	274	8	2.73	263	0.56018	0.00612	Ccl3 / Ccl4 / Ccl5 / Ddt / Glipr2 / Gnai2 / Pycard / Slc9a3r1
GO:0034502	protein localization to chromosome	82	1	0.82	2253	0.56046	0.56046	Rpa2
GO:0014896	muscle hypertrophy	82	1	0.82	2254	0.56046	0.56046	Cyba
GO:0048565	digestive tract development	82	1	0.82	2255	0.56046	0.56046	Id2
GO:0007584	response to nutrient	82	1	0.82	2256	0.56046	0.56046	Tmbim6
GO:0071456	cellular response to hypoxia	82	1	0.82	2257	0.56046	0.56046	Tmbim6
GO:0007043	cell-cell junction assembly	82	1	0.82	2258	0.56046	0.56046	Wdr1
[truncated: 6,437 more rows]

## Sheet: TopGO analysis Combo vs Control
GO.ID	Term	Annotated	Significant	Expected	Rank in Fisher.classic	Fisher.elim	Fisher.classic	Sig.Gene
GO:0071346	cellular response to interferon-gamma	103	7	0.43	14	2.4e-07	2.4e-07	Actg1 / Ccl5 / Gbp2 / Gbp4 / Gbp6 / H2-Q7 / Rpl13a
GO:0051607	defense response to virus	188	10	0.79	12	2.9e-07	5.5e-09	Ccl5 / Cd8a / Gbp4 / Il10rb / Mx1 / Oas3 / Pycard / Samhd1 / Spn / Zbp1
GO:0050901	leukocyte tethering or rolling	21	3	0.09	41	9e-05	9e-05	Itgb7 / Selplg / Spn
GO:0009617	response to bacterium	487	12	2.05	15	9.9e-05	7.1e-07	Ccl5 / Gbp2 / Gbp6 / Gzma / H2-T23 / Hba-a1 / Hba-a2 / Pla2g16 / Plac8 / Pycard / Rpl13a / Spn
GO:0071593	lymphocyte aggregation	5	2	0.02	48	0.00017	0.00017	Rac2 / Spn
GO:0042270	protection from natural killer cell mediated cytotoxicity	5	2	0.02	49	0.00017	0.00017	H2-T23 / Tap1
GO:0034112	positive regulation of homotypic cell-cell adhesion	6	2	0.03	57	0.00026	0.00026	Ccl5 / Lgals1
GO:2000406	positive regulation of T cell migration	31	3	0.13	58	0.00029	0.00029	Ccl5 / Pycard / Spn
GO:0042832	defense response to protozoan	32	3	0.13	59	0.00032	0.00032	Batf / Gbp2 / Gbp6
GO:0002474	antigen processing and presentation of peptide antigen via MHC class I	20	4	0.08	18	0.00034	1.3e-06	H2-Q7 / H2-T23 / Tap1 / Tapbp
GO:2001187	positive regulation of CD8-positive, alpha-beta T cell activation	8	2	0.03	64	0.00048	0.00048	H2-T23 / Runx3
GO:0060753	regulation of mast cell chemotaxis	8	2	0.03	65	0.00048	0.00048	Ccl5 / Rac2
GO:0042590	antigen processing and presentation of exogenous peptide antigen via MHC class I	8	2	0.03	66	0.00048	0.00048	Tap1 / Tapbp
GO:0019885	antigen processing and presentation of endogenous peptide antigen via MHC class I	8	2	0.03	67	0.00048	0.00048	Tap1 / Tapbp
GO:0042102	positive regulation of T cell proliferation	87	4	0.37	68	0.00049	0.00049	Ccl5 / H2-T23 / Pycard / Spn
GO:0035458	cellular response to interferon-beta	41	3	0.17	73	0.00068	0.00068	Gbp2 / Gbp6 / Igtp
GO:0006857	oligopeptide transport	11	2	0.05	79	0.00094	0.00094	Slc9a3r1 / Slco3a1
GO:0044406	adhesion of symbiont to host	15	2	0.06	103	0.00177	0.00177	Gbp2 / Gbp6
GO:0097190	apoptotic signaling pathway	541	8	2.28	108	0.00186	0.00186	Anxa6 / Crip1 / Gzmb / Ifi27l2a / Pycard / Runx3 / Slc9a3r1 / Spn
GO:0002476	antigen processing and presentation of endogenous peptide antigen via MHC class Ib	16	2	0.07	111	0.00202	0.00202	H2-Q7 / H2-T23
GO:0002295	T-helper cell lineage commitment	16	2	0.07	112	0.00202	0.00202	Batf / Spn
GO:0042744	hydrogen peroxide catabolic process	17	2	0.07	119	0.00228	0.00228	Hba-a1 / Hbb-bt
GO:0060338	regulation of type I interferon-mediated signaling pathway	19	2	0.08	128	0.00285	0.00285	Samhd1 / Zbp1
GO:0002250	adaptive immune response	360	10	1.52	21	0.00304	2.3e-06	Batf / Cd8a / Dbnl / Gzmb / H2-Q7 / H2-T23 / Pou2f2 / Pycard / Spn / Tap1
GO:0050830	defense response to Gram-positive bacterium	69	3	0.29	131	0.00306	0.00306	Gbp2 / Gbp6 / H2-T23
GO:0002456	T cell mediated immunity	106	5	0.45	39	0.00355	8.2e-05	Cd8a / Gzmb / H2-Q7 / H2-T23 / Spn
GO:0032069	regulation of nuclease activity	22	2	0.09	139	0.00382	0.00382	Gzma / Oas3
GO:0071222	cellular response to lipopolysaccharide	154	4	0.65	141	0.00402	0.00402	Ccl5 / Gbp2 / Gbp6 / Pycard
GO:0002335	mature B cell differentiation	24	2	0.1	146	0.00454	0.00454	Lgals1 / Pou2f2
GO:0032480	negative regulation of type I interferon production	24	2	0.1	147	0.00454	0.00454	Gbp4 / Pycard
GO:0031348	negative regulation of defense response	171	6	0.72	38	0.00465	8.1e-05	H2-T23 / Pycard / Samhd1 / Spn / Tap1 / Trafd1
GO:0051259	protein complex oligomerization	497	7	2.09	151	0.00473	0.00473	Anxa6 / Ccl5 / Hba-a1 / Hbb-bt / Pycard / S100a10 / Samhd1
GO:0031295	T cell costimulation	25	2	0.11	154	0.00492	0.00492	Lgals1 / Spn
GO:0032760	positive regulation of tumor necrosis factor production	83	3	0.35	158	0.00515	0.00515	H2-T23 / Pycard / Spn
GO:0019835	cytolysis	26	2	0.11	159	0.00532	0.00532	Gzma / Gzmb
GO:0002230	positive regulation of defense response to virus by host	26	2	0.11	160	0.00532	0.00532	Ccl5 / Pycard
GO:0048305	immunoglobulin secretion	27	2	0.11	167	0.00573	0.00573	H2-T23 / Pou2f2
GO:0048821	erythrocyte development	29	2	0.12	170	0.00659	0.00659	Hba-a1 / Hba-a2
GO:0001916	positive regulation of T cell mediated cytotoxicity	31	2	0.13	176	0.00751	0.00751	H2-Q7 / H2-T23
GO:0001773	myeloid dendritic cell activation	32	2	0.13	180	0.00799	0.00799	Batf / Pycard
GO:0016601	Rac protein signal transduction	34	2	0.14	182	0.00898	0.00898	Dbnl / Rac2
GO:0048246	macrophage chemotaxis	37	2	0.16	188	0.01058	0.01058	Ccl5 / Rpl13a
GO:0042742	defense response to bacterium	182	6	0.77	43	0.0106	0.00011	Gbp2 / Gbp6 / H2-T23 / Plac8 / Pycard / Spn
GO:0032609	interferon-gamma production	108	3	0.46	190	0.01062	0.01062	Pycard / Runx3 / Spn
GO:0061448	connective tissue development	206	4	0.87	191	0.01105	0.01105	Anxa6 / Id2 / Pla2g16 / Runx3
GO:0060612	adipose tissue development	38	2	0.16	193	0.01114	0.01114	Id2 / Pla2g16
GO:0001562	response to protozoan	35	4	0.15	28	0.012	1.4e-05	Batf / Gbp2 / Gbp6 / Spn
GO:0050688	regulation of defense response to virus	68	4	0.29	52	0.01271	0.00019	Ccl5 / Gbp4 / Pycard / Spn
GO:0045824	negative regulation of innate immune response	48	4	0.2	33	0.01326	4.8e-05	H2-T23 / Samhd1 / Tap1 / Trafd1
GO:1903900	regulation of viral life cycle	120	3	0.51	200	0.0141	0.0141	Ccl5 / Lgals1 / Oas3
GO:1905517	macrophage migration	43	2	0.18	201	0.01411	0.01411	Ccl5 / Rpl13a
GO:0050701	interleukin-1 secretion	43	2	0.18	202	0.01411	0.01411	Pycard / S100a13
GO:0050777	negative regulation of immune response	132	5	0.56	54	0.01501	0.00023	H2-T23 / Samhd1 / Spn / Tap1 / Trafd1
GO:0045071	negative regulation of viral genome replication	45	2	0.19	207	0.01539	0.01539	Ccl5 / Oas3
GO:0071622	regulation of granulocyte chemotaxis	45	2	0.19	208	0.01539	0.01539	Ccl5 / Rac2
GO:0032989	cellular component morphogenesis	936	9	3.94	210	0.01588	0.01588	Actg1 / Dbnl / Id2 / Itgb7 / Rac2 / Runx3 / S100a10 / S100a13 / Slc9a3r1
GO:0043392	negative regulation of DNA binding	46	2	0.19	211	0.01605	0.01605	Gzma / Id2
GO:0002673	regulation of acute inflammatory response	47	2	0.2	213	0.01672	0.01672	Ccl5 / Spn
GO:0045087	innate immune response	556	16	2.34	9	0.01683	7.4e-10	Actg1 / Ccl5 / Gbp2 / Gbp4 / Gbp6 / Gzmb / H2-Q7 / H2-T23 / Mx1 / Oas3 / Pycard / Rpl13a / Samhd1 / Tap1 / Trafd1 / Zbp1
GO:0045620	negative regulation of lymphocyte differentiation	50	2	0.21	216	0.01879	0.01879	Id2 / Runx3
GO:0048469	cell maturation	135	3	0.57	221	0.01926	0.01926	Id2 / Pou2f2 / Runx3
GO:0051250	negative regulation of lymphocyte activation	137	3	0.58	223	0.02002	0.02002	Id2 / Runx3 / Spn
GO:0016032	viral process	248	4	1.04	225	0.02048	0.02048	Ccl5 / Lgals1 / Oas3 / Zbp1
GO:2001181	positive regulation of interleukin-10 secretion	5	1	0.02	227	0.02089	0.02089	Pycard
GO:0034316	negative regulation of Arp2/3 complex-mediated actin nucleation	5	1	0.02	228	0.02089	0.02089	Gmfg
GO:0002580	regulation of antigen processing and presentation of peptide or polysaccharide antigen via MHC class II	5	1	0.02	229	0.02089	0.02089	Pycard
GO:2000110	negative regulation of macrophage apoptotic process	5	1	0.02	230	0.02089	0.02089	Ccl5
GO:0010792	DNA double-strand break processing involved in repair via single-strand annealing	5	1	0.02	231	0.02089	0.02089	Rnf138
GO:0050904	diapedesis	5	1	0.02	232	0.02089	0.02089	Ccl5
GO:0046070	dGTP metabolic process	5	1	0.02	233	0.02089	0.02089	Samhd1
GO:0009217	purine deoxyribonucleoside triphosphate catabolic process	5	1	0.02	234	0.02089	0.02089	Samhd1
GO:0060158	phospholipase C-activating dopamine receptor signaling pathway	5	1	0.02	235	0.02089	0.02089	Slc9a3r1
GO:0032415	regulation of sodium:proton antiporter activity	5	1	0.02	236	0.02089	0.02089	Slc9a3r1
GO:0032687	negative regulation of interferon-alpha production	5	1	0.02	237	0.02089	0.02089	Gbp4
GO:0031584	activation of phospholipase D activity	5	1	0.02	238	0.02089	0.02089	Ccl5
GO:2001238	positive regulation of extrinsic apoptotic signaling pathway	53	2	0.22	239	0.02097	0.02097	Pycard / Runx3
GO:0051291	protein heterooligomerization	140	3	0.59	240	0.02119	0.02119	Hba-a1 / Hbb-bt / S100a10
GO:0043122	regulation of I-kappaB kinase/NF-kappaB signaling	141	3	0.59	243	0.02158	0.02158	Pycard / S100a13 / S100a4
GO:0033627	cell adhesion mediated by integrin	54	2	0.23	244	0.02172	0.02172	Ccl5 / Itgb7
GO:0051262	protein tetramerization	142	3	0.6	245	0.02198	0.02198	Ccl5 / S100a10 / Samhd1
GO:0002763	positive regulation of myeloid leukocyte differentiation	56	2	0.24	247	0.02325	0.02325	Ccl5 / Id2
GO:0002381	immunoglobulin production involved in immunoglobulin mediated immune response	56	2	0.24	248	0.02325	0.02325	Batf / Pou2f2
GO:0032722	positive regulation of chemokine production	56	2	0.24	249	0.02325	0.02325	Ccl5 / Pycard
GO:0016445	somatic diversification of immunoglobulins	57	2	0.24	251	0.02403	0.02403	Batf / Samhd1
GO:0002683	negative regulation of immune system process	412	7	1.74	99	0.02483	0.00167	H2-T23 / Id2 / Runx3 / Samhd1 / Spn / Tap1 / Trafd1
GO:1904177	regulation of adipose tissue development	6	1	0.03	254	0.02502	0.02502	Pla2g16
GO:0043376	regulation of CD8-positive, alpha-beta T cell differentiation	6	1	0.03	255	0.02502	0.02502	Runx3
GO:2000501	regulation of natural killer cell chemotaxis	6	1	0.03	256	0.02502	0.02502	Ccl5
GO:0031293	membrane protein intracellular domain proteolysis	6	1	0.03	257	0.02502	0.02502	Aph1a
GO:0035747	natural killer cell chemotaxis	6	1	0.03	258	0.02502	0.02502	Ccl5
GO:0009155	purine deoxyribonucleotide catabolic process	6	1	0.03	259	0.02502	0.02502	Samhd1
GO:0009146	purine nucleoside triphosphate catabolic process	6	1	0.03	260	0.02502	0.02502	Samhd1
GO:0006108	malate metabolic process	6	1	0.03	261	0.02502	0.02502	Mdh1
GO:0072501	cellular divalent inorganic anion homeostasis	6	1	0.03	262	0.02502	0.02502	Slc9a3r1
GO:0072502	cellular trivalent inorganic anion homeostasis	6	1	0.03	263	0.02502	0.02502	Slc9a3r1
GO:0030643	cellular phosphate ion homeostasis	6	1	0.03	264	0.02502	0.02502	Slc9a3r1
GO:0033634	positive regulation of cell-cell adhesion mediated by integrin	6	1	0.03	265	0.02502	0.02502	Ccl5
GO:0000902	cell morphogenesis	850	8	3.58	266	0.02553	0.02553	Dbnl / Id2 / Itgb7 / Rac2 / Runx3 / S100a10 / S100a13 / Slc9a3r1
GO:1902107	positive regulation of leukocyte differentiation	151	3	0.64	268	0.02578	0.02578	Ccl5 / Id2 / Runx3
GO:0031589	cell-substrate adhesion	269	4	1.13	270	0.02662	0.02662	Itgb7 / Lgals1 / Rac2 / S100a10
GO:0050792	regulation of viral process	154	3	0.65	271	0.02711	0.02711	Ccl5 / Lgals1 / Oas3
GO:0002695	negative regulation of leukocyte activation	156	3	0.66	277	0.02803	0.02803	Id2 / Runx3 / Spn
GO:0001656	metanephros development	63	2	0.27	279	0.02893	0.02893	Aph1a / Id2
GO:0043065	positive regulation of apoptotic process	556	6	2.34	282	0.02913	0.02913	Ccl5 / Gzma / Ifi27l2a / Pycard / Runx3 / Slc9a3r1
GO:0044351	macropinocytosis	7	1	0.03	283	0.02913	0.02913	Pycard
GO:0045002	double-strand break repair via single-strand annealing	7	1	0.03	284	0.02913	0.02913	Rnf138
GO:0032071	regulation of endodeoxyribonuclease activity	7	1	0.03	285	0.02913	0.02913	Gzma
GO:0032074	negative regulation of nuclease activity	7	1	0.03	286	0.02913	0.02913	Gzma
GO:0043353	enucleate erythrocyte differentiation	7	1	0.03	287	0.02913	0.02913	Id2
GO:2000564	regulation of CD8-positive, alpha-beta T cell proliferation	7	1	0.03	288	0.02913	0.02913	H2-T23
GO:0060754	positive regulation of mast cell chemotaxis	7	1	0.03	289	0.02913	0.02913	Ccl5
GO:0007191	adenylate cyclase-activating dopamine receptor signaling pathway	7	1	0.03	290	0.02913	0.02913	Slc9a3r1
GO:0090148	membrane fission	7	1	0.03	291	0.02913	0.02913	Mx1
GO:0002583	regulation of antigen processing and presentation of peptide antigen	7	1	0.03	292	0.02913	0.02913	Pycard
GO:0035740	CD8-positive, alpha-beta T cell proliferation	7	1	0.03	293	0.02913	0.02913	H2-T23
GO:0050703	interleukin-1 alpha secretion	7	1	0.03	294	0.02913	0.02913	S100a13
GO:0051126	negative regulation of actin nucleation	7	1	0.03	295	0.02913	0.02913	Gmfg
GO:0009204	deoxyribonucleoside triphosphate catabolic process	7	1	0.03	296	0.02913	0.02913	Samhd1
GO:0071493	cellular response to UV-B	7	1	0.03	297	0.02913	0.02913	Crip1
GO:2000766	negative regulation of cytoplasmic translation	7	1	0.03	298	0.02913	0.02913	Rpl13a
GO:0043068	positive regulation of programmed cell death	561	6	2.36	300	0.03025	0.03025	Ccl5 / Gzma / Ifi27l2a / Pycard / Runx3 / Slc9a3r1
GO:0002200	somatic diversification of immune receptors	65	2	0.27	301	0.03065	0.03065	Batf / Samhd1
GO:0030036	actin cytoskeleton organization	566	6	2.38	302	0.0314	0.0314	Actg1 / Gmfg / Pycard / Rac2 / S100a10 / Slc9a3r1
GO:0071347	cellular response to interleukin-1	66	2	0.28	303	0.03152	0.03152	Ccl5 / Pycard
GO:1903901	negative regulation of viral life cycle	66	2	0.28	304	0.03152	0.03152	Ccl5 / Oas3
GO:2001235	positive regulation of apoptotic signaling pathway	165	3	0.7	306	0.03233	0.03233	Pycard / Runx3 / Slc9a3r1
GO:2001179	regulation of interleukin-10 secretion	8	1	0.03	308	0.03322	0.03322	Pycard
GO:0031622	positive regulation of fever generation	8	1	0.03	309	0.03322	0.03322	Ccl5
GO:0046598	positive regulation of viral entry into host cell	8	1	0.03	310	0.03322	0.03322	Lgals1
GO:0061635	regulation of protein complex stability	8	1	0.03	311	0.03322	0.03322	Tapbp
GO:0051683	establishment of Golgi localization	8	1	0.03	312	0.03322	0.03322	Slc9a3r1
GO:0003149	membranous septum morphogenesis	8	1	0.03	313	0.03322	0.03322	Id2
GO:0046060	dATP metabolic process	8	1	0.03	314	0.03322	0.03322	Samhd1
GO:0072683	T cell extravasation	8	1	0.03	315	0.03322	0.03322	Ccl5
GO:0043252	sodium-independent organic anion transport	8	1	0.03	316	0.03322	0.03322	Slco3a1
GO:0007249	I-kappaB kinase/NF-kappaB signaling	168	3	0.71	317	0.03384	0.03384	Pycard / S100a13 / S100a4
GO:0044403	symbiont process	315	6	1.33	115	0.03389	0.00206	Ccl5 / Gbp2 / Gbp6 / Lgals1 / Oas3 / Zbp1
GO:0019058	viral life cycle	170	3	0.72	318	0.03487	0.03487	Ccl5 / Lgals1 / Oas3
GO:0002275	myeloid cell activation involved in immune response	70	2	0.29	319	0.03512	0.03512	Pycard / Rac2
GO:0043900	regulation of multi-organism process	330	6	1.39	126	0.0354	0.00259	Ccl5 / Gbp4 / Lgals1 / Oas3 / Pycard / Spn
GO:0050866	negative regulation of cell activation	172	3	0.72	321	0.03591	0.03591	Id2 / Runx3 / Spn
GO:0031349	positive regulation of defense response	296	4	1.25	322	0.03599	0.03599	Ccl5 / H2-T23 / Pycard / Zbp1
GO:0006919	activation of cysteine-type endopeptidase activity involved in apoptotic process	71	2	0.3	323	0.03604	0.03604	Ifi27l2a / Pycard
GO:0010810	regulation of cell-substrate adhesion	173	3	0.73	325	0.03644	0.03644	Lgals1 / Rac2 / S100a10
GO:1902905	positive regulation of supramolecular fiber organization	174	3	0.73	326	0.03697	0.03697	Gmfg / Pycard / S100a10
GO:0002312	B cell activation involved in immune response	72	2	0.3	327	0.03697	0.03697	Batf / Lgals1
GO:0043922	negative regulation by host of viral transcription	9	1	0.04	329	0.0373	0.0373	Ccl5
GO:0035634	response to stilbenoid	9	1	0.04	330	0.0373	0.0373	Hba-a1
GO:0060263	regulation of respiratory burst	9	1	0.04	331	0.0373	0.0373	Rac2
GO:0031620	regulation of fever generation	9	1	0.04	332	0.0373	0.0373	Ccl5
GO:0032070	regulation of deoxyribonuclease activity	9	1	0.04	333	0.0373	0.0373	Gzma
GO:2000343	positive regulation of chemokine (C-X-C motif) ligand 2 production	9	1	0.04	334	0.0373	0.0373	Ccl5
GO:0046485	ether lipid metabolic process	9	1	0.04	335	0.0373	0.0373	Pla2g16
GO:0055062	phosphate ion homeostasis	9	1	0.04	336	0.0373	0.0373	Slc9a3r1
GO:0071888	macrophage apoptotic process	9	1	0.04	337	0.0373	0.0373	Ccl5
GO:0060339	negative regulation of type I interferon-mediated signaling pathway	9	1	0.04	338	0.0373	0.0373	Samhd1
GO:2000109	regulation of macrophage apoptotic process	9	1	0.04	339	0.0373	0.0373	Ccl5
GO:0045475	locomotor rhythm	9	1	0.04	340	0.0373	0.0373	Id2
GO:0072505	divalent inorganic anion homeostasis	9	1	0.04	341	0.0373	0.0373	Slc9a3r1
GO:0072506	trivalent inorganic anion homeostasis	9	1	0.04	342	0.0373	0.0373	Slc9a3r1
GO:0051014	actin filament severing	9	1	0.04	343	0.0373	0.0373	Gmfg
GO:0072608	interleukin-10 secretion	9	1	0.04	344	0.0373	0.0373	Pycard
GO:0044419	interspecies interaction between organisms	330	6	1.39	127	0.03944	0.00259	Ccl5 / Gbp2 / Gbp6 / Lgals1 / Oas3 / Zbp1
GO:0045069	regulation of viral genome replication	75	2	0.32	349	0.03982	0.03982	Ccl5 / Oas3
GO:0032612	interleukin-1 production	75	2	0.32	350	0.03982	0.03982	Pycard / S100a13
GO:0014066	regulation of phosphatidylinositol 3-kinase signaling	76	2	0.32	351	0.04078	0.04078	Ccl5 / Slc9a3r1
GO:0032642	regulation of chemokine production	76	2	0.32	352	0.04078	0.04078	Ccl5 / Pycard
GO:0008626	granzyme-mediated apoptotic signaling pathway	10	1	0.04	353	0.04136	0.04136	Gzmb
GO:0031652	positive regulation of heat generation	10	1	0.04	354	0.04136	0.04136	Ccl5
GO:0002883	regulation of hypersensitivity	10	1	0.04	355	0.04136	0.04136	Spn
GO:0046386	deoxyribose phosphate catabolic process	10	1	0.04	356	0.04136	0.04136	Samhd1
GO:0001765	membrane raft assembly	10	1	0.04	357	0.04136	0.04136	S100a10
GO:0001731	formation of translation preinitiation complex	10	1	0.04	358	0.04136	0.04136	Rpl13a
GO:0060700	regulation of ribonuclease activity	10	1	0.04	359	0.04136	0.04136	Oas3
GO:0002579	positive regulation of antigen processing and presentation	10	1	0.04	360	0.04136	0.04136	Pycard
GO:0007220	Notch receptor processing	10	1	0.04	361	0.04136	0.04136	Aph1a
GO:0002674	negative regulation of acute inflammatory response	10	1	0.04	362	0.04136	0.04136	Spn
GO:0032610	interleukin-1 alpha production	10	1	0.04	363	0.04136	0.04136	S100a13
GO:0002690	positive regulation of leukocyte chemotaxis	77	2	0.32	364	0.04176	0.04176	Ccl5 / Rac2
GO:0010942	positive regulation of cell death	608	6	2.56	368	0.04224	0.04224	Ccl5 / Gzma / Ifi27l2a / Pycard / Runx3 / Slc9a3r1
GO:0043903	regulation of symbiosis, encompassing mutualism through parasitism	185	3	0.78	369	0.04307	0.04307	Ccl5 / Lgals1 / Oas3
GO:1903708	positive regulation of hemopoiesis	185	3	0.78	370	0.04307	0.04307	Ccl5 / Id2 / Runx3
GO:0032602	chemokine production	79	2	0.33	372	0.04374	0.04374	Ccl5 / Pycard
GO:0048525	negative regulation of viral process	79	2	0.33	373	0.04374	0.04374	Ccl5 / Oas3
GO:0002862	negative regulation of inflammatory response to antigenic stimulus	11	1	0.05	375	0.0454	0.0454	Spn
GO:2000650	negative regulation of sodium ion transmembrane transporter activity	11	1	0.05	376	0.0454	0.0454	Slc9a3r1
GO:0002524	hypersensitivity	11	1	0.05	377	0.0454	0.0454	Spn
GO:0060340	positive regulation of type I interferon-mediated signaling pathway	11	1	0.05	378	0.0454	0.0454	Zbp1
GO:0009264	deoxyribonucleotide catabolic process	11	1	0.05	379	0.0454	0.0454	Samhd1
GO:0070293	renal absorption	11	1	0.05	380	0.0454	0.0454	Slc9a3r1
GO:0033632	regulation of cell-cell adhesion mediated by integrin	11	1	0.05	381	0.0454	0.0454	Ccl5
GO:0001660	fever generation	11	1	0.05	382	0.0454	0.0454	Ccl5
GO:0070555	response to interleukin-1	81	2	0.34	383	0.04575	0.04575	Ccl5 / Pycard
GO:0006955	immune response	1110	23	4.68	7	0.04634	4e-11	Actg1 / Batf / Ccl5 / Cd8a / Dbnl / Gbp2 / Gbp4 / Gbp6 / Gzmb / H2-Q7 / H2-T23 / Lgals1 / Mx1 / Oas3 / Pou2f2 / Pycard / Rac2 / Rpl13a / Samhd1 / Spn / Tap1 / Trafd1 / Zbp1
GO:0002573	myeloid leukocyte differentiation	191	3	0.8	384	0.0466	0.0466	Batf / Ccl5 / Id2
GO:0030593	neutrophil chemotaxis	82	2	0.35	385	0.04677	0.04677	Ccl5 / Rac2
GO:0002443	leukocyte mediated immunity	320	9	1.35	26	0.04746	7.1e-06	Batf / Cd8a / Gzmb / H2-Q7 / H2-T23 / Pou2f2 / Rac2 / Spn / Tap1
GO:0034446	substrate adhesion-dependent cell spreading	83	2	0.35	386	0.0478	0.0478	Itgb7 / S100a10
GO:0002366	leukocyte activation involved in immune response	216	5	0.91	118	0.04818	0.00213	Batf / Lgals1 / Pycard / Rac2 / Spn
GO:0051495	positive regulation of cytoskeleton organization	194	3	0.82	388	0.04841	0.04841	Gmfg / Pycard / S100a10
GO:0048468	cell development	1783	14	7.51	204	0.0487	0.01463	Actg1 / Anxa6 / Ccl5 / Dbnl / Hba-a1 / Hba-a2 / Id2 / Itgb7 / Lgals1 / Pou2f2 / Rac2 / Runx3 / S100a10 / Slc9a3r1
GO:0030838	positive regulation of actin filament polymerization	84	2	0.35	389	0.04884	0.04884	Gmfg / Pycard
GO:0030029	actin filament-based process	631	6	2.66	390	0.04907	0.04907	Actg1 / Gmfg / Pycard / Rac2 / S100a10 / Slc9a3r1
GO:0031650	regulation of heat generation	12	1	0.05	391	0.04943	0.04943	Ccl5
GO:0090197	positive regulation of chemokine secretion	12	1	0.05	392	0.04943	0.04943	Pycard
GO:0002864	regulation of acute inflammatory response to antigenic stimulus	12	1	0.05	393	0.04943	0.04943	Spn
GO:2000341	regulation of chemokine (C-X-C motif) ligand 2 production	12	1	0.05	394	0.04943	0.04943	Ccl5
GO:0071285	cellular response to lithium ion	12	1	0.05	395	0.04943	0.04943	Id2
GO:1902306	negative regulation of sodium ion transmembrane transport	12	1	0.05	396	0.04943	0.04943	Slc9a3r1
GO:0016446	somatic hypermutation of immunoglobulin genes	12	1	0.05	397	0.04943	0.04943	Samhd1
GO:2000484	positive regulation of interleukin-8 secretion	12	1	0.05	398	0.04943	0.04943	Pycard
GO:0006662	glycerol ether metabolic process	12	1	0.05	399	0.04943	0.04943	Pla2g16
GO:0003161	cardiac conduction system development	12	1	0.05	400	0.04943	0.04943	Id2
GO:0010226	response to lithium ion	12	1	0.05	401	0.04943	0.04943	Id2
GO:0048715	negative regulation of oligodendrocyte differentiation	12	1	0.05	402	0.04943	0.04943	Id2
GO:0009143	nucleoside triphosphate catabolic process	12	1	0.05	403	0.04943	0.04943	Samhd1
GO:0072540	T-helper 17 cell lineage commitment	12	1	0.05	404	0.04943	0.04943	Batf
GO:0006107	oxaloacetate metabolic process	12	1	0.05	405	0.04943	0.04943	Mdh1
GO:0051024	positive regulation of immunoglobulin secretion	12	1	0.05	406	0.04943	0.04943	H2-T23
GO:0045198	establishment of epithelial cell apical/basal polarity	12	1	0.05	407	0.04943	0.04943	Slc9a3r1
GO:0045060	negative thymic T cell selection	12	1	0.05	408	0.04943	0.04943	Spn
GO:0048541	Peyer's patch development	12	1	0.05	409	0.04943	0.04943	Id2
GO:0048537	mucosal-associated lymphoid tissue development	12	1	0.05	410	0.04943	0.04943	Id2
GO:0045089	positive regulation of innate immune response	196	3	0.83	411	0.04964	0.04964	H2-T23 / Pycard / Zbp1
GO:0045639	positive regulation of myeloid cell differentiation	85	2	0.36	412	0.04988	0.04988	Ccl5 / Id2
GO:0002263	cell activation involved in immune response	220	5	0.93	124	0.05057	0.00231	Batf / Lgals1 / Pycard / Rac2 / Spn
GO:0002526	acute inflammatory response	88	2	0.37	415	0.05306	0.05306	Ccl5 / Spn
GO:0060088	auditory receptor cell stereocilium organization	13	1	0.05	416	0.05343	0.05343	Slc9a3r1
GO:0090196	regulation of chemokine secretion	13	1	0.05	417	0.05343	0.05343	Pycard
GO:0043383	negative T cell selection	13	1	0.05	418	0.05343	0.05343	Spn
GO:0010642	negative regulation of platelet-derived growth factor receptor signaling pathway	13	1	0.05	419	0.05343	0.05343	Slc9a3r1
GO:0097202	activation of cysteine-type endopeptidase activity	13	1	0.05	420	0.05343	0.05343	Pycard
GO:0002566	somatic diversification of immune receptors via somatic mutation	13	1	0.05	421	0.05343	0.05343	Samhd1
GO:0031269	pseudopodium assembly	13	1	0.05	422	0.05343	0.05343	Ccl5
GO:0042535	positive regulation of tumor necrosis factor biosynthetic process	13	1	0.05	423	0.05343	0.05343	Spn
GO:0072567	chemokine (C-X-C motif) ligand 2 production	13	1	0.05	424	0.05343	0.05343	Ccl5
GO:0009215	purine deoxyribonucleoside triphosphate metabolic process	13	1	0.05	425	0.05343	0.05343	Samhd1
GO:0060644	mammary gland epithelial cell differentiation	13	1	0.05	426	0.05343	0.05343	Id2
GO:0010820	positive regulation of T cell chemotaxis	13	1	0.05	427	0.05343	0.05343	Ccl5
GO:0002062	chondrocyte differentiation	89	2	0.38	428	0.05414	0.05414	Anxa6 / Runx3
GO:0019079	viral genome replication	91	2	0.38	430	0.05631	0.05631	Ccl5 / Oas3
GO:1902106	negative regulation of leukocyte differentiation	92	2	0.39	431	0.05741	0.05741	Id2 / Runx3
GO:0030002	cellular anion homeostasis	14	1	0.06	432	0.05743	0.05743	Slc9a3r1
GO:0090195	chemokine secretion	14	1	0.06	433	0.05743	0.05743	Pycard
GO:0043374	CD8-positive, alpha-beta T cell differentiation	14	1	0.06	434	0.05743	0.05743	Runx3
GO:0045947	negative regulation of translational initiation	14	1	0.06	435	0.05743	0.05743	Rpl13a
GO:0014067	negative regulation of phosphatidylinositol 3-kinase signaling	14	1	0.06	436	0.05743	0.05743	Slc9a3r1
GO:0034315	regulation of Arp2/3 complex-mediated actin nucleation	14	1	0.06	437	0.05743	0.05743	Gmfg
GO:0032736	positive regulation of interleukin-13 production	14	1	0.06	438	0.05743	0.05743	H2-T23
GO:0030320	cellular monovalent inorganic anion homeostasis	14	1	0.06	439	0.05743	0.05743	Slc9a3r1
GO:0051645	Golgi localization	14	1	0.06	440	0.05743	0.05743	Slc9a3r1
GO:0009151	purine deoxyribonucleotide metabolic process	14	1	0.06	441	0.05743	0.05743	Samhd1
GO:0045651	positive regulation of macrophage differentiation	14	1	0.06	442	0.05743	0.05743	Id2
GO:0033631	cell-cell adhesion mediated by integrin	14	1	0.06	443	0.05743	0.05743	Ccl5
GO:0048557	embryonic digestive tract morphogenesis	14	1	0.06	444	0.05743	0.05743	Id2
GO:0010819	regulation of T cell chemotaxis	14	1	0.06	445	0.05743	0.05743	Ccl5
GO:0007015	actin filament organization	349	4	1.47	448	0.05933	0.05933	Gmfg / Pycard / Rac2 / S100a10
GO:0043123	positive regulation of I-kappaB kinase/NF-kappaB signaling	94	2	0.4	449	0.05963	0.05963	S100a13 / S100a4
GO:0030033	microvillus assembly	15	1	0.06	453	0.0614	0.0614	Slc9a3r1
GO:0030859	polarized epithelial cell differentiation	15	1	0.06	454	0.0614	0.0614	Slc9a3r1
GO:0031268	pseudopodium organization	15	1	0.06	455	0.0614	0.0614	Ccl5
GO:1900016	negative regulation of cytokine production involved in inflammatory response	15	1	0.06	456	0.0614	0.0614	Pycard
GO:0018904	ether metabolic process	15	1	0.06	457	0.0614	0.0614	Pla2g16
GO:0044062	regulation of excretion	15	1	0.06	458	0.0614	0.0614	Slc9a3r1
GO:0042308	negative regulation of protein import into nucleus	15	1	0.06	459	0.0614	0.0614	Gbp4
GO:1904590	negative regulation of protein import	15	1	0.06	460	0.0614	0.0614	Gbp4
GO:0002093	auditory receptor cell morphogenesis	15	1	0.06	461	0.0614	0.0614	Slc9a3r1
GO:0070234	positive regulation of T cell apoptotic process	15	1	0.06	462	0.0614	0.0614	Ccl5
GO:1990266	neutrophil migration	98	2	0.41	464	0.06416	0.06416	Ccl5 / Rac2
GO:0002831	regulation of response to biotic stimulus	128	4	0.54	116	0.06511	0.00206	Ccl5 / Gbp4 / Pycard / Spn
GO:0002377	immunoglobulin production	129	4	0.54	117	0.06512	0.00212	Batf / H2-T23 / Pou2f2 / Samhd1
GO:0015732	prostaglandin transport	16	1	0.07	465	0.06536	0.06536	Slco3a1
GO:0033033	negative regulation of myeloid cell apoptotic process	16	1	0.07	466	0.06536	0.06536	Ccl5
GO:0031649	heat generation	16	1	0.07	467	0.06536	0.06536	Ccl5
GO:0035089	establishment of apical/basal cell polarity	16	1	0.07	468	0.06536	0.06536	Slc9a3r1
GO:0140131	positive regulation of lymphocyte chemotaxis	16	1	0.07	469	0.06536	0.06536	Ccl5
GO:0002577	regulation of antigen processing and presentation	16	1	0.07	470	0.06536	0.06536	Pycard
GO:0010224	response to UV-B	16	1	0.07	471	0.06536	0.06536	Crip1
GO:0048711	positive regulation of astrocyte differentiation	16	1	0.07	472	0.06536	0.06536	Id2
GO:0040015	negative regulation of multicellular organism growth	16	1	0.07	473	0.06536	0.06536	Plac8
GO:0032688	negative regulation of interferon-beta production	16	1	0.07	474	0.06536	0.06536	Pycard
GO:0072678	T cell migration	48	4	0.2	34	0.06614	4.8e-05	Ccl5 / Itgb7 / Pycard / Spn
GO:0048661	positive regulation of smooth muscle cell proliferation	100	2	0.42	475	0.06647	0.06647	Ccl5 / Id2
GO:0110053	regulation of actin filament organization	225	3	0.95	478	0.06917	0.06917	Gmfg / Pycard / S100a10
GO:0060218	hematopoietic stem cell differentiation	17	1	0.07	479	0.0693	0.0693	Batf
GO:0010155	regulation of proton transport	17	1	0.07	480	0.0693	0.0693	Slc9a3r1
GO:0003418	growth plate cartilage chondrocyte differentiation	17	1	0.07	481	0.0693	0.0693	Anxa6
GO:0090026	positive regulation of monocyte chemotaxis	17	1	0.07	482	0.0693	0.0693	Ccl5
GO:0010766	negative regulation of sodium ion transport	17	1	0.07	483	0.0693	0.0693	Slc9a3r1
GO:0000729	DNA double-strand break processing	17	1	0.07	484	0.0693	0.0693	Rnf138
GO:0045064	T-helper 2 cell differentiation	17	1	0.07	485	0.0693	0.0693	Batf
GO:0021700	developmental maturation	226	3	0.95	486	0.06989	0.06989	Id2 / Pou2f2 / Runx3
GO:0015718	monocarboxylic acid transport	103	2	0.43	487	0.06998	0.06998	Slc9a3r1 / Slco3a1
GO:0071621	granulocyte chemotaxis	103	2	0.43	488	0.06998	0.06998	Ccl5 / Rac2
GO:0014065	phosphatidylinositol 3-kinase signaling	104	2	0.44	489	0.07117	0.07117	Ccl5 / Slc9a3r1
GO:0048002	antigen processing and presentation of peptide antigen	49	5	0.21	20	0.0724	1.9e-06	H2-Q7 / H2-T23 / Pycard / Tap1 / Tapbp
GO:0002710	negative regulation of T cell mediated immunity	18	1	0.08	490	0.07323	0.07323	Spn
GO:0042789	mRNA transcription by RNA polymerase II	18	1	0.08	491	0.07323	0.07323	Runx3
GO:0061162	establishment of monopolar cell polarity	18	1	0.08	492	0.07323	0.07323	Slc9a3r1
GO:0002495	antigen processing and presentation of peptide antigen via MHC class II	18	1	0.08	493	0.07323	0.07323	Pycard
GO:0010759	positive regulation of macrophage chemotaxis	18	1	0.08	494	0.07323	0.07323	Ccl5
GO:0002183	cytoplasmic translational initiation	18	1	0.08	495	0.07323	0.07323	Rpl13a
GO:0033630	positive regulation of cell adhesion mediated by integrin	18	1	0.08	496	0.07323	0.07323	Ccl5
GO:0032656	regulation of interleukin-13 production	18	1	0.08	497	0.07323	0.07323	H2-T23
GO:0010818	T cell chemotaxis	18	1	0.08	498	0.07323	0.07323	Ccl5
GO:0031579	membrane raft organization	18	1	0.08	499	0.07323	0.07323	S100a10
GO:0008630	intrinsic apoptotic signaling pathway in response to DNA damage	106	2	0.45	500	0.07355	0.07355	Crip1 / Pycard
GO:0050868	negative regulation of T cell activation	108	2	0.46	501	0.07597	0.07597	Runx3 / Spn
GO:0043280	positive regulation of cysteine-type endopeptidase activity involved in apoptotic process	108	2	0.46	502	0.07597	0.07597	Ifi27l2a / Pycard
GO:0010592	positive regulation of lamellipodium assembly	19	1	0.08	505	0.07714	0.07714	Rac2
GO:0006907	pinocytosis	19	1	0.08	506	0.07714	0.07714	Pycard
GO:0061339	establishment or maintenance of monopolar cell polarity	19	1	0.08	507	0.07714	0.07714	Slc9a3r1
GO:0018230	peptidyl-L-cysteine S-palmitoylation	19	1	0.08	508	0.07714	0.07714	Zdhhc18
GO:0018231	peptidyl-S-diacylglycerol-L-cysteine biosynthetic process from peptidyl-cysteine	19	1	0.08	509	0.07714	0.07714	Zdhhc18
GO:2000482	regulation of interleukin-8 secretion	19	1	0.08	510	0.07714	0.07714	Pycard
GO:0002313	mature B cell differentiation involved in immune response	19	1	0.08	511	0.07714	0.07714	Lgals1
GO:0048245	eosinophil chemotaxis	19	1	0.08	512	0.07714	0.07714	Ccl5
GO:0002504	antigen processing and presentation of peptide or polysaccharide antigen via MHC class II	19	1	0.08	513	0.07714	0.07714	Pycard
GO:0072337	modified amino acid transport	19	1	0.08	514	0.07714	0.07714	Slc9a3r1
GO:0045649	regulation of macrophage differentiation	19	1	0.08	515	0.07714	0.07714	Id2
GO:0009200	deoxyribonucleoside triphosphate metabolic process	19	1	0.08	516	0.07714	0.07714	Samhd1
GO:0032616	interleukin-13 production	19	1	0.08	517	0.07714	0.07714	H2-T23
GO:0002761	regulation of myeloid leukocyte differentiation	111	2	0.47	520	0.07964	0.07964	Ccl5 / Id2
GO:0000724	double-strand break repair via homologous recombination	111	2	0.47	521	0.07964	0.07964	Rnf138 / Samhd1
GO:0000725	recombinational repair	111	2	0.47	522	0.07964	0.07964	Rnf138 / Samhd1
GO:0051258	protein polymerization	239	3	1.01	523	0.07967	0.07967	Gmfg / Mx1 / Pycard
GO:0007162	negative regulation of cell adhesion	240	3	1.01	524	0.08044	0.08044	Lgals1 / Runx3 / Spn
GO:0061377	mammary gland lobule development	20	1	0.08	526	0.08103	0.08103	Id2
GO:0060749	mammary gland alveolus development	20	1	0.08	527	0.08103	0.08103	Id2
GO:0002320	lymphoid progenitor cell differentiation	20	1	0.08	528	0.08103	0.08103	Batf
GO:0046641	positive regulation of alpha-beta T cell proliferation	20	1	0.08	529	0.08103	0.08103	H2-T23
GO:0032897	negative regulation of viral transcription	20	1	0.08	530	0.08103	0.08103	Ccl5
GO:0042533	tumor necrosis factor biosynthetic process	20	1	0.08	531	0.08103	0.08103	Spn
GO:0042534	regulation of tumor necrosis factor biosynthetic process	20	1	0.08	532	0.08103	0.08103	Spn
GO:0002438	acute inflammatory response to antigenic stimulus	20	1	0.08	533	0.08103	0.08103	Spn
GO:0043011	myeloid dendritic cell differentiation	20	1	0.08	534	0.08103	0.08103	Batf
GO:0045063	T-helper 1 cell differentiation	20	1	0.08	535	0.08103	0.08103	Spn
GO:0060117	auditory receptor cell development	20	1	0.08	536	0.08103	0.08103	Slc9a3r1
GO:0019221	cytokine-mediated signaling pathway	269	5	1.13	162	0.08206	0.00544	Ccl5 / Il10rb / Pycard / Samhd1 / Zbp1
GO:0032273	positive regulation of protein polymerization	113	2	0.48	537	0.08211	0.08211	Gmfg / Pycard
GO:0016064	immunoglobulin mediated immune response	113	2	0.48	538	0.08211	0.08211	Batf / Pou2f2
GO:0050728	negative regulation of inflammatory response	115	2	0.48	542	0.08461	0.08461	Pycard / Spn
GO:0051101	regulation of DNA binding	115	2	0.48	543	0.08461	0.08461	Gzma / Id2
GO:0019724	B cell mediated immunity	115	2	0.48	544	0.08461	0.08461	Batf / Pou2f2
GO:0045730	respiratory burst	21	1	0.09	545	0.08491	0.08491	Rac2
GO:0051354	negative regulation of oxidoreductase activity	21	1	0.09	546	0.08491	0.08491	Gzma
GO:1905523	positive regulation of macrophage migration	21	1	0.09	547	0.08491	0.08491	Ccl5
GO:0010640	regulation of platelet-derived growth factor receptor signaling pathway	21	1	0.09	548	0.08491	0.08491	Slc9a3r1
GO:0010043	response to zinc ion	21	1	0.09	549	0.08491	0.08491	Crip1
GO:0043153	entrainment of circadian clock by photoperiod	21	1	0.09	550	0.08491	0.08491	Id2
GO:1901623	regulation of lymphocyte chemotaxis	21	1	0.09	551	0.08491	0.08491	Ccl5
GO:0051023	regulation of immunoglobulin secretion	21	1	0.09	552	0.08491	0.08491	H2-T23
GO:0071677	positive regulation of mononuclear cell migration	21	1	0.09	553	0.08491	0.08491	Ccl5
GO:0006310	DNA recombination	247	3	1.04	554	0.08597	0.08597	Batf / Rnf138 / Samhd1
GO:1903038	negative regulation of leukocyte cell-cell adhesion	118	2	0.5	557	0.0884	0.0884	Runx3 / Spn
GO:0002252	immune effector process	617	18	2.6	8	0.08865	4e-11	Batf / Ccl5 / Cd8a / Gbp4 / Gzmb / H2-Q7 / H2-T23 / Il10rb / Lgals1 / Mx1 / Oas3 / Pou2f2 / Pycard / Rac2 / Samhd1 / Spn / Tap1 / Zbp1
GO:0031069	hair follicle morphogenesis	22	1	0.09	558	0.08877	0.08877	Runx3
GO:0090023	positive regulation of neutrophil chemotaxis	22	1	0.09	559	0.08877	0.08877	Rac2
GO:0032753	positive regulation of interleukin-4 production	22	1	0.09	560	0.08877	0.08877	H2-T23
GO:0009648	photoperiodism	22	1	0.09	561	0.08877	0.08877	Id2
GO:0009649	entrainment of circadian clock	22	1	0.09	562	0.08877	0.08877	Id2
GO:0071709	membrane assembly	22	1	0.09	563	0.08877	0.08877	S100a10
GO:2000178	negative regulation of neural precursor cell proliferation	22	1	0.09	564	0.08877	0.08877	Id2
GO:0071800	podosome assembly	22	1	0.09	565	0.08877	0.08877	Dbnl
GO:0072677	eosinophil migration	22	1	0.09	566	0.08877	0.08877	Ccl5
GO:0032528	microvillus organization	22	1	0.09	567	0.08877	0.08877	Slc9a3r1
GO:0019731	antibacterial humoral response	22	1	0.09	568	0.08877	0.08877	H2-T23
GO:0072606	interleukin-8 secretion	22	1	0.09	569	0.08877	0.08877	Pycard
GO:0070230	positive regulation of lymphocyte apoptotic process	22	1	0.09	570	0.08877	0.08877	Ccl5
GO:0050921	positive regulation of chemotaxis	119	2	0.5	572	0.08968	0.08968	Ccl5 / Rac2
GO:0001913	T cell mediated cytotoxicity	54	3	0.23	92	0.0899	0.00152	Gzmb / H2-Q7 / H2-T23
GO:0045786	negative regulation of cell cycle	405	4	1.71	573	0.09097	0.09097	Id2 / Pla2g16 / Runx3 / Slc9a3r1
GO:0071356	cellular response to tumor necrosis factor	121	2	0.51	574	0.09225	0.09225	Ccl5 / Pycard
GO:0043921	modulation by host of viral transcription	23	1	0.1	575	0.09262	0.09262	Ccl5
GO:0051894	positive regulation of focal adhesion assembly	23	1	0.1	576	0.09262	0.09262	S100a10
GO:0052312	modulation of transcription in other organism involved in symbiotic interaction	23	1	0.1	577	0.09262	0.09262	Ccl5
GO:0046823	negative regulation of nucleocytoplasmic transport	23	1	0.1	578	0.09262	0.09262	Gbp4
GO:0002861	regulation of inflammatory response to antigenic stimulus	23	1	0.1	579	0.09262	0.09262	Spn
GO:0052472	modulation by host of symbiont transcription	23	1	0.1	580	0.09262	0.09262	Ccl5
GO:0043371	negative regulation of CD4-positive, alpha-beta T cell differentiation	23	1	0.1	581	0.09262	0.09262	Runx3
GO:0003413	chondrocyte differentiation involved in endochondral bone morphogenesis	23	1	0.1	582	0.09262	0.09262	Anxa6
GO:0090025	regulation of monocyte chemotaxis	23	1	0.1	583	0.09262	0.09262	Ccl5
GO:0002675	positive regulation of acute inflammatory response	23	1	0.1	584	0.09262	0.09262	Ccl5
GO:0045648	positive regulation of erythrocyte differentiation	23	1	0.1	585	0.09262	0.09262	Id2
GO:0070233	negative regulation of T cell apoptotic process	23	1	0.1	586	0.09262	0.09262	Ccl5
GO:0042104	positive regulation of activated T cell proliferation	23	1	0.1	587	0.09262	0.09262	Pycard
GO:2000765	regulation of cytoplasmic translation	23	1	0.1	588	0.09262	0.09262	Rpl13a
GO:0045061	thymic T cell selection	23	1	0.1	589	0.09262	0.09262	Spn
GO:0048015	phosphatidylinositol-mediated signaling	122	2	0.51	590	0.09354	0.09354	Ccl5 / Slc9a3r1
GO:0097530	granulocyte migration	122	2	0.51	591	0.09354	0.09354	Ccl5 / Rac2
GO:2001056	positive regulation of cysteine-type endopeptidase activity	124	2	0.52	593	0.09614	0.09614	Ifi27l2a / Pycard
GO:0007588	excretion	24	1	0.1	594	0.09645	0.09645	Slc9a3r1
GO:0051560	mitochondrial calcium ion homeostasis	24	1	0.1	595	0.09645	0.09645	Anxa6
GO:0006195	purine nucleotide catabolic process	24	1	0.1	596	0.09645	0.09645	Samhd1
GO:0072348	sulfur compound transport	24	1	0.1	597	0.09645	0.09645	Slc9a3r1
GO:0045686	negative regulation of glial cell differentiation	24	1	0.1	598	0.09645	0.09645	Id2
GO:0009299	mRNA transcription	24	1	0.1	599	0.09645	0.09645	Runx3
GO:0042119	neutrophil activation	24	1	0.1	600	0.09645	0.09645	Ccl5
GO:0048566	embryonic digestive tract development	24	1	0.1	601	0.09645	0.09645	Id2
GO:0006925	inflammatory cell apoptotic process	24	1	0.1	602	0.09645	0.09645	Ccl5
GO:0071624	positive regulation of granulocyte chemotaxis	24	1	0.1	603	0.09645	0.09645	Rac2
GO:0002697	regulation of immune effector process	340	8	1.43	40	0.09646	8.5e-05	Ccl5 / Gbp4 / H2-Q7 / H2-T23 / Pycard / Rac2 / Spn / Tap1
GO:0070372	regulation of ERK1 and ERK2 cascade	260	3	1.1	604	0.09664	0.09664	Ccl5 / Pycard / Slc9a3r1
GO:0097435	supramolecular fiber organization	580	5	2.44	605	0.09688	0.09688	Actg1 / Gmfg / Pycard / Rac2 / S100a10
GO:0048017	inositol lipid-mediated signaling	125	2	0.53	606	0.09745	0.09745	Ccl5 / Slc9a3r1
GO:1902105	regulation of leukocyte differentiation	262	3	1.1	607	0.09833	0.09833	Ccl5 / Id2 / Runx3
GO:0072331	signal transduction by p53 class mediator	126	2	0.53	608	0.09876	0.09876	Batf / Pycard
GO:0002521	leukocyte differentiation	486	8	2.05	80	0.09905	0.00094	Batf / Ccl5 / Cd8a / Id2 / Lgals1 / Pou2f2 / Runx3 / Spn
GO:0002449	lymphocyte mediated immunity	247	8	1.04	27	0.09907	8.7e-06	Batf / Cd8a / Gzmb / H2-Q7 / H2-T23 / Pou2f2 / Spn / Tap1
GO:0045777	positive regulation of blood pressure	25	1	0.11	609	0.10026	0.10026	Id2
GO:0055083	monovalent inorganic anion homeostasis	25	1	0.11	610	0.10026	0.10026	Slc9a3r1
GO:0051125	regulation of actin nucleation	25	1	0.11	611	0.10026	0.10026	Gmfg
GO:0021772	olfactory bulb development	25	1	0.11	612	0.10026	0.10026	Id2
GO:0034205	amyloid-beta formation	25	1	0.11	613	0.10026	0.10026	Aph1a
GO:2000778	positive regulation of interleukin-6 secretion	25	1	0.11	614	0.10026	0.10026	Pycard
GO:0006734	NADH metabolic process	25	1	0.11	615	0.10026	0.10026	Mdh1
GO:0010803	regulation of tumor necrosis factor-mediated signaling pathway	25	1	0.11	616	0.10026	0.10026	Pycard
GO:0097193	intrinsic apoptotic signaling pathway	266	3	1.12	617	0.10174	0.10174	Crip1 / Pycard / Slc9a3r1
GO:0120031	plasma membrane bounded cell projection assembly	422	4	1.78	618	0.10192	0.10192	Ccl5 / Dbnl / Rac2 / Slc9a3r1
GO:0043087	regulation of GTPase activity	267	3	1.13	620	0.1026	0.1026	Ccl5 / Pycard / S100a10
GO:0014003	oligodendrocyte development	26	1	0.11	621	0.10406	0.10406	Id2
GO:0046639	negative regulation of alpha-beta T cell differentiation	26	1	0.11	622	0.10406	0.10406	Runx3
GO:0050718	positive regulation of interleukin-1 beta secretion	26	1	0.11	623	0.10406	0.10406	Pycard
GO:0048730	epidermis morphogenesis	26	1	0.11	624	0.10406	0.10406	Runx3
GO:0006099	tricarboxylic acid cycle	26	1	0.11	625	0.10406	0.10406	Mdh1
GO:0072539	T-helper 17 cell differentiation	26	1	0.11	626	0.10406	0.10406	Batf
GO:1902745	positive regulation of lamellipodium organization	26	1	0.11	627	0.10406	0.10406	Rac2
GO:0002274	myeloid leukocyte activation	168	4	0.71	163	0.1065	0.00546	Batf / Ccl5 / Pycard / Rac2
GO:0050727	regulation of inflammatory response	272	3	1.15	628	0.10695	0.10695	Ccl5 / Pycard / Spn
GO:0033006	regulation of mast cell activation involved in immune response	27	1	0.11	629	0.10784	0.10784	Rac2
GO:0009394	2'-deoxyribonucleotide metabolic process	27	1	0.11	630	0.10784	0.10784	Samhd1
GO:0019692	deoxyribose phosphate metabolic process	27	1	0.11	631	0.10784	0.10784	Samhd1
GO:0046596	regulation of viral entry into host cell	27	1	0.11	632	0.10784	0.10784	Lgals1
GO:1900181	negative regulation of protein localization to nucleus	27	1	0.11	633	0.10784	0.10784	Gbp4
GO:0043304	regulation of mast cell degranulation	27	1	0.11	634	0.10784	0.10784	Rac2
GO:0003417	growth plate cartilage development	27	1	0.11	635	0.10784	0.10784	Anxa6
GO:0007097	nuclear migration	27	1	0.11	636	0.10784	0.10784	Slc9a3r1
GO:0090200	positive regulation of release of cytochrome c from mitochondria	27	1	0.11	637	0.10784	0.10784	Pycard
GO:0050716	positive regulation of interleukin-1 secretion	27	1	0.11	638	0.10784	0.10784	Pycard
GO:0045672	positive regulation of osteoclast differentiation	27	1	0.11	639	0.10784	0.10784	Ccl5
GO:0010758	regulation of macrophage chemotaxis	27	1	0.11	640	0.10784	0.10784	Ccl5
GO:0021988	olfactory lobe development	27	1	0.11	641	0.10784	0.10784	Id2
GO:0006953	acute-phase response	27	1	0.11	642	0.10784	0.10784	Ccl5
GO:0032673	regulation of interleukin-4 production	27	1	0.11	643	0.10784	0.10784	H2-T23
GO:0048535	lymph node development	27	1	0.11	644	0.10784	0.10784	Id2
GO:0032647	regulation of interferon-alpha production	27	1	0.11	645	0.10784	0.10784	Gbp4
GO:0070371	ERK1 and ERK2 cascade	274	3	1.15	647	0.10871	0.10871	Ccl5 / Pycard / Slc9a3r1
GO:0002819	regulation of adaptive immune response	169	4	0.71	165	0.1091	0.00558	H2-Q7 / H2-T23 / Pycard / Spn
GO:0030098	lymphocyte differentiation	334	7	1.41	69	0.10992	0.00049	Batf / Cd8a / Id2 / Lgals1 / Pou2f2 / Runx3 / Spn
GO:0045123	cellular extravasation	50	4	0.21	35	0.11015	5.7e-05	Ccl5 / Itgb7 / Selplg / Spn
GO:0030031	cell projection assembly	435	4	1.83	649	0.11069	0.11069	Ccl5 / Dbnl / Rac2 / Slc9a3r1
GO:0006952	defense response	1095	23	4.61	5	0.11146	3e-11	Actg1 / Batf / Ccl5 / Cd8a / Gbp2 / Gbp4 / Gbp6 / Gzmb / H2-Q7 / H2-T23 / Igtp / Il10rb / Mx1 / Oas3 / Plac8 / Pycard / Rpl13a / Samhd1 / Spn / Tap1 / Tapbp / Trafd1 / Zbp1
GO:0032607	interferon-alpha production	28	1	0.12	651	0.11161	0.11161	Gbp4
GO:0090162	establishment of epithelial cell polarity	28	1	0.12	652	0.11161	0.11161	Slc9a3r1
GO:0090022	regulation of neutrophil chemotaxis	28	1	0.12	653	0.11161	0.11161	Rac2
GO:0018345	protein palmitoylation	28	1	0.12	654	0.11161	0.11161	Zdhhc18
GO:0043433	negative regulation of DNA-binding transcription factor activity	137	2	0.58	656	0.11352	0.11352	Id2 / Pycard
GO:0000904	cell morphogenesis involved in differentiation	610	5	2.57	657	0.11365	0.11365	Id2 / Itgb7 / Runx3 / S100a10 / Slc9a3r1
GO:0034612	response to tumor necrosis factor	138	2	0.58	660	0.11489	0.11489	Ccl5 / Pycard
GO:0010950	positive regulation of endopeptidase activity	138	2	0.58	661	0.11489	0.11489	Ifi27l2a / Pycard
GO:0008360	regulation of cell shape	138	2	0.58	662	0.11489	0.11489	S100a13 / Slc9a3r1
GO:0036230	granulocyte activation	29	1	0.12	663	0.11536	0.11536	Ccl5
GO:1901890	positive regulation of cell junction assembly	29	1	0.12	664	0.11536	0.11536	S100a10
GO:0034314	Arp2/3 complex-mediated actin nucleation	29	1	0.12	665	0.11536	0.11536	Gmfg
GO:0031297	replication fork processing	29	1	0.12	666	0.11536	0.11536	Samhd1
GO:1902624	positive regulation of neutrophil migration	29	1	0.12	667	0.11536	0.11536	Rac2
GO:0044091	membrane biogenesis	29	1	0.12	668	0.11536	0.11536	S100a10
GO:0009409	response to cold	29	1	0.12	669	0.11536	0.11536	Plac8
GO:0072538	T-helper 17 type immune response	29	1	0.12	670	0.11536	0.11536	Batf
GO:2000249	regulation of actin cytoskeleton reorganization	29	1	0.12	671	0.11536	0.11536	Gmfg
GO:1903393	positive regulation of adherens junction organization	29	1	0.12	672	0.11536	0.11536	S100a10
GO:0030833	regulation of actin filament polymerization	140	2	0.59	676	0.11764	0.11764	Gmfg / Pycard
GO:0033032	regulation of myeloid cell apoptotic process	30	1	0.13	677	0.11909	0.11909	Ccl5
GO:0001779	natural killer cell differentiation	30	1	0.13	678	0.11909	0.11909	Id2
GO:0007031	peroxisome organization	30	1	0.13	679	0.11909	0.11909	Pla2g16
GO:0007212	dopamine receptor signaling pathway	30	1	0.13	680	0.11909	0.11909	Slc9a3r1
GO:0048710	regulation of astrocyte differentiation	30	1	0.13	681	0.11909	0.11909	Id2
GO:0006101	citrate metabolic process	30	1	0.13	682	0.11909	0.11909	Mdh1
GO:0045197	establishment or maintenance of epithelial cell apical/basal polarity	30	1	0.13	683	0.11909	0.11909	Slc9a3r1
GO:2001236	regulation of extrinsic apoptotic signaling pathway	142	2	0.6	685	0.12041	0.12041	Pycard / Runx3
GO:0044089	positive regulation of cellular component biogenesis	450	4	1.9	686	0.12122	0.12122	Gmfg / Pycard / Rac2 / S100a10
GO:1903707	negative regulation of hemopoiesis	143	2	0.6	687	0.1218	0.1218	Id2 / Runx3
GO:0051345	positive regulation of hydrolase activity	451	4	1.9	688	0.12193	0.12193	Ccl5 / Ifi27l2a / Pycard / S100a10
GO:0010591	regulation of lamellipodium assembly	31	1	0.13	689	0.12281	0.12281	Rac2
GO:0002717	positive regulation of natural killer cell mediated immunity	31	1	0.13	690	0.12281	0.12281	H2-T23
GO:1905521	regulation of macrophage migration	31	1	0.13	691	0.12281	0.12281	Ccl5
GO:2000515	negative regulation of CD4-positive, alpha-beta T cell activation	31	1	0.13	692	0.12281	0.12281	Runx3
GO:0032733	positive regulation of interleukin-10 production	31	1	0.13	693	0.12281	0.12281	Pycard
GO:0045577	regulation of B cell differentiation	31	1	0.13	694	0.12281	0.12281	Id2
GO:0051647	nucleus localization	31	1	0.13	695	0.12281	0.12281	Slc9a3r1
GO:0051181	cofactor transport	31	1	0.13	696	0.12281	0.12281	Slc9a3r1
GO:0050706	regulation of interleukin-1 beta secretion	31	1	0.13	697	0.12281	0.12281	Pycard
GO:0051260	protein homooligomerization	291	3	1.23	698	0.12411	0.12411	Anxa6 / Pycard / Samhd1
GO:0048839	inner ear development	145	2	0.61	699	0.12459	0.12459	H2-T23 / Slc9a3r1
GO:0001659	temperature homeostasis	145	2	0.61	700	0.12459	0.12459	Ccl5 / Plac8
GO:0072657	protein localization to membrane	456	4	1.92	701	0.12555	0.12555	Itgb7 / S100a10 / Slc9a3r1 / Zdhhc18
GO:0032956	regulation of actin cytoskeleton organization	293	3	1.23	702	0.12597	0.12597	Gmfg / Pycard / S100a10
GO:0048660	regulation of smooth muscle cell proliferation	146	2	0.62	703	0.12599	0.12599	Ccl5 / Id2
GO:0010952	positive regulation of peptidase activity	146	2	0.62	704	0.12599	0.12599	Ifi27l2a / Pycard
GO:0002460	adaptive immune response based on somatic recombination of immune receptors built from immunoglobulin superfamily domains	264	7	1.11	44	0.12612	0.00012	Batf / Cd8a / Gzmb / H2-Q7 / H2-T23 / Pou2f2 / Spn
GO:1902533	positive regulation of intracellular signal transduction	813	6	3.43	705	0.12637	0.12637	Ccl5 / Cd8a / Pycard / S100a13 / S100a4 / Slc9a3r1
GO:0007157	heterophilic cell-cell adhesion via plasma membrane cell adhesion molecules	32	1	0.13	706	0.12652	0.12652	Lgals1
GO:0098868	bone growth	32	1	0.13	707	0.12652	0.12652	Anxa6
GO:0003416	endochondral bone growth	32	1	0.13	708	0.12652	0.12652	Anxa6
GO:0033598	mammary gland epithelial cell proliferation	32	1	0.13	709	0.12652	0.12652	Id2
GO:0050869	negative regulation of B cell activation	32	1	0.13	710	0.12652	0.12652	Id2
GO:0009262	deoxyribonucleotide metabolic process	32	1	0.13	711	0.12652	0.12652	Samhd1
GO:0048512	circadian behavior	32	1	0.13	712	0.12652	0.12652	Id2
GO:0060122	inner ear receptor cell stereocilium organization	32	1	0.13	713	0.12652	0.12652	Slc9a3r1
GO:0051100	negative regulation of binding	148	2	0.62	715	0.12881	0.12881	Gzma / Id2
GO:0032633	interleukin-4 production	33	1	0.14	717	0.1302	0.1302	H2-T23
GO:0033028	myeloid cell apoptotic process	33	1	0.14	718	0.1302	0.1302	Ccl5
GO:0010518	positive regulation of phospholipase activity	33	1	0.14	719	0.1302	0.1302	Ccl5
GO:0042987	amyloid precursor protein catabolic process	33	1	0.14	720	0.1302	0.1302	Aph1a
GO:0007622	rhythmic behavior	33	1	0.14	721	0.1302	0.1302	Id2
GO:1900026	positive regulation of substrate adhesion-dependent cell spreading	33	1	0.14	722	0.1302	0.1302	S100a10
GO:1900015	regulation of cytokine production involved in inflammatory response	33	1	0.14	723	0.1302	0.1302	Pycard
GO:0032731	positive regulation of interleukin-1 beta production	33	1	0.14	724	0.1302	0.1302	Pycard
GO:0046006	regulation of activated T cell proliferation	33	1	0.14	725	0.1302	0.1302	Pycard
GO:0043901	negative regulation of multi-organism process	149	2	0.63	726	0.13022	0.13022	Ccl5 / Oas3
GO:0051216	cartilage development	150	2	0.63	727	0.13164	0.13164	Anxa6 / Runx3
GO:0048659	smooth muscle cell proliferation	151	2	0.64	729	0.13306	0.13306	Ccl5 / Id2
GO:0043491	protein kinase B signaling	151	2	0.64	730	0.13306	0.13306	Ccl5 / Slc9a3r1
GO:0030225	macrophage differentiation	34	1	0.14	731	0.13388	0.13388	Id2
GO:1901571	fatty acid derivative transport	34	1	0.14	732	0.13388	0.13388	Slco3a1
GO:0071715	icosanoid transport	34	1	0.14	733	0.13388	0.13388	Slco3a1
GO:0072350	tricarboxylic acid metabolic process	34	1	0.14	734	0.13388	0.13388	Mdh1
GO:0072523	purine-containing compound catabolic process	34	1	0.14	735	0.13388	0.13388	Samhd1
GO:2000108	positive regulation of leukocyte apoptotic process	34	1	0.14	736	0.13388	0.13388	Ccl5
GO:0033628	regulation of cell adhesion mediated by integrin	34	1	0.14	737	0.13388	0.13388	Ccl5
GO:0072604	interleukin-6 secretion	34	1	0.14	738	0.13388	0.13388	Pycard
GO:0030041	actin filament polymerization	153	2	0.64	740	0.13591	0.13591	Gmfg / Pycard
GO:0009615	response to virus	229	11	0.96	10	0.13654	2.5e-09	Ccl5 / Cd8a / Gbp4 / Ifi27l2a / Il10rb / Mx1 / Oas3 / Pycard / Samhd1 / Spn / Zbp1
GO:0009967	positive regulation of signal transduction	1216	8	5.12	741	0.13697	0.13697	Ccl5 / Cd8a / Pycard / Runx3 / S100a13 / S100a4 / Slc9a3r1 / Zbp1
GO:2001242	regulation of intrinsic apoptotic signaling pathway	154	2	0.65	742	0.13734	0.13734	Pycard / Slc9a3r1
GO:1902903	regulation of supramolecular fiber organization	305	3	1.29	743	0.13736	0.13736	Gmfg / Pycard / S100a10
GO:0071158	positive regulation of cell cycle arrest	35	1	0.15	744	0.13754	0.13754	Id2
GO:0051898	negative regulation of protein kinase B signaling	35	1	0.15	745	0.13754	0.13754	Slc9a3r1
GO:0097028	dendritic cell differentiation	35	1	0.15	746	0.13754	0.13754	Batf
GO:0046640	regulation of alpha-beta T cell proliferation	35	1	0.15	747	0.13754	0.13754	H2-T23
GO:0048713	regulation of oligodendrocyte differentiation	35	1	0.15	748	0.13754	0.13754	Id2
GO:0000266	mitochondrial fission	35	1	0.15	749	0.13754	0.13754	Mx1
GO:0070229	negative regulation of lymphocyte apoptotic process	35	1	0.15	750	0.13754	0.13754	Ccl5
GO:0002707	negative regulation of lymphocyte mediated immunity	42	3	0.18	77	0.14044	0.00073	H2-T23 / Spn / Tap1
GO:0045214	sarcomere organization	36	1	0.15	752	0.14118	0.14118	Actg1
GO:0050435	amyloid-beta metabolic process	36	1	0.15	753	0.14118	0.14118	Aph1a
GO:0014014	negative regulation of gliogenesis	36	1	0.15	754	0.14118	0.14118	Id2
GO:0002534	cytokine production involved in inflammatory response	36	1	0.15	755	0.14118	0.14118	Pycard
GO:0042491	inner ear auditory receptor cell differentiation	36	1	0.15	756	0.14118	0.14118	Slc9a3r1
GO:0050704	regulation of interleukin-1 secretion	36	1	0.15	757	0.14118	0.14118	Pycard
GO:0042092	type 2 immune response	36	1	0.15	758	0.14118	0.14118	Batf
GO:0008064	regulation of actin polymerization or depolymerization	158	2	0.67	759	0.1431	0.1431	Gmfg / Pycard
GO:0051046	regulation of secretion	658	5	2.77	760	0.14319	0.14319	Ccl5 / H2-T23 / Pycard / Rac2 / Slc9a3r1
GO:0035088	establishment or maintenance of apical/basal cell polarity	37	1	0.16	761	0.14481	0.14481	Slc9a3r1
GO:1902622	regulation of neutrophil migration	37	1	0.16	762	0.14481	0.14481	Rac2
GO:0061245	establishment or maintenance of bipolar cell polarity	37	1	0.16	763	0.14481	0.14481	Slc9a3r1
GO:0050702	interleukin-1 beta secretion	37	1	0.16	764	0.14481	0.14481	Pycard
GO:0030832	regulation of actin filament length	160	2	0.67	766	0.146	0.146	Gmfg / Pycard
GO:0030099	myeloid cell differentiation	353	5	1.49	212	0.14609	0.01635	Batf / Ccl5 / Hba-a1 / Hba-a2 / Id2
GO:0002703	regulation of leukocyte mediated immunity	202	5	0.85	95	0.14615	0.00159	H2-Q7 / H2-T23 / Rac2 / Spn / Tap1
GO:0045005	DNA-dependent DNA replication maintenance of fidelity	38	1	0.16	767	0.14842	0.14842	Samhd1
GO:0032732	positive regulation of interleukin-1 production	38	1	0.16	768	0.14842	0.14842	Pycard
GO:0046633	alpha-beta T cell proliferation	38	1	0.16	769	0.14842	0.14842	H2-T23
GO:0060351	cartilage development involved in endochondral bone morphogenesis	38	1	0.16	770	0.14842	0.14842	Anxa6
GO:0048546	digestive tract morphogenesis	38	1	0.16	771	0.14842	0.14842	Id2
GO:0022408	negative regulation of cell-cell adhesion	162	2	0.68	772	0.14892	0.14892	Runx3 / Spn
GO:0007568	aging	163	2	0.69	773	0.15038	0.15038	Id2 / Ifi27l2a
GO:0001816	cytokine production	626	8	2.64	149	0.15141	0.00455	Batf / Ccl5 / Gbp4 / H2-T23 / Pycard / Runx3 / S100a13 / Spn
GO:0048863	stem cell differentiation	164	2	0.69	775	0.15184	0.15184	Anxa6 / Batf
GO:0045619	regulation of lymphocyte differentiation	164	2	0.69	776	0.15184	0.15184	Id2 / Runx3
GO:0033003	regulation of mast cell activation	39	1	0.16	777	0.15202	0.15202	Rac2
GO:0097178	ruffle assembly	39	1	0.16	778	0.15202	0.15202	Dbnl
GO:0002823	negative regulation of adaptive immune response based on somatic recombination of immune receptors built from immunoglobulin superfamily domains	39	1	0.16	779	0.15202	0.15202	Spn
GO:0019674	NAD metabolic process	39	1	0.16	780	0.15202	0.15202	Mdh1
GO:0043303	mast cell degranulation	39	1	0.16	781	0.15202	0.15202	Rac2
GO:0006509	membrane protein ectodomain proteolysis	39	1	0.16	782	0.15202	0.15202	Aph1a
GO:0032757	positive regulation of interleukin-8 production	39	1	0.16	783	0.15202	0.15202	Pycard
GO:0035315	hair cell differentiation	39	1	0.16	784	0.15202	0.15202	Slc9a3r1
GO:0002279	mast cell activation involved in immune response	39	1	0.16	785	0.15202	0.15202	Rac2
GO:0046782	regulation of viral transcription	39	1	0.16	786	0.15202	0.15202	Ccl5
GO:0031032	actomyosin structure organization	165	2	0.7	787	0.15331	0.15331	Actg1 / S100a10
GO:0002709	regulation of T cell mediated immunity	72	3	0.3	138	0.15467	0.00345	H2-Q7 / H2-T23 / Spn
GO:0043583	ear development	166	2	0.7	788	0.15478	0.15478	H2-T23 / Slc9a3r1
GO:0007160	cell-matrix adhesion	166	2	0.7	789	0.15478	0.15478	Itgb7 / S100a10
GO:0007566	embryo implantation	40	1	0.17	790	0.1556	0.1556	H2-Q7
GO:0001961	positive regulation of cytokine-mediated signaling pathway	40	1	0.17	791	0.1556	0.1556	Zbp1
GO:0043300	regulation of leukocyte degranulation	40	1	0.17	792	0.1556	0.1556	Rac2
GO:0046513	ceramide biosynthetic process	40	1	0.17	793	0.1556	0.1556	Cers4
GO:0002448	mast cell mediated immunity	40	1	0.17	794	0.1556	0.1556	Rac2
GO:0043124	negative regulation of I-kappaB kinase/NF-kappaB signaling	40	1	0.17	795	0.1556	0.1556	Pycard
GO:0060412	ventricular septum morphogenesis	40	1	0.17	796	0.1556	0.1556	Id2
GO:0060193	positive regulation of lipase activity	40	1	0.17	797	0.1556	0.1556	Ccl5
GO:0070232	regulation of T cell apoptotic process	40	1	0.17	798	0.1556	0.1556	Ccl5
GO:1902743	regulation of lamellipodium organization	40	1	0.17	799	0.1556	0.1556	Rac2
GO:0051707	response to other organism	696	21	2.93	1	0.15839	3.1e-13	Batf / Ccl5 / Cd8a / Gbp2 / Gbp4 / Gbp6 / Gzma / H2-T23 / Hba-a1 / Hba-a2 / Ifi27l2a / Il10rb / Mx1 / Oas3 / Pla2g16 / Plac8 / Pycard / Rpl13a / Samhd1 / Spn / Zbp1
GO:0006974	cellular response to DNA damage stimulus	681	5	2.87	800	0.15845	0.15845	Batf / Crip1 / Pycard / Rnf138 / Samhd1
GO:0050798	activated T cell proliferation	41	1	0.17	801	0.15917	0.15917	Pycard
GO:0046636	negative regulation of alpha-beta T cell activation	41	1	0.17	802	0.15917	0.15917	Runx3
GO:0045668	negative regulation of osteoblast differentiation	41	1	0.17	803	0.15917	0.15917	Id2
GO:0045687	positive regulation of glial cell differentiation	41	1	0.17	804	0.15917	0.15917	Id2
GO:0050873	brown fat cell differentiation	41	1	0.17	805	0.15917	0.15917	Plac8
GO:0045010	actin nucleation	41	1	0.17	806	0.15917	0.15917	Gmfg
GO:0043207	response to external biotic stimulus	697	21	2.94	2	0.1609	3.2e-13	Batf / Ccl5 / Cd8a / Gbp2 / Gbp4 / Gbp6 / Gzma / H2-T23 / Hba-a1 / Hba-a2 / Ifi27l2a / Il10rb / Mx1 / Oas3 / Pla2g16 / Plac8 / Pycard / Rpl13a / Samhd1 / Spn / Zbp1
GO:0032970	regulation of actin filament-based process	329	3	1.39	807	0.16115	0.16115	Gmfg / Pycard / S100a10
GO:0042771	intrinsic apoptotic signaling pathway in response to DNA damage by p53 class mediator	42	1	0.18	809	0.16272	0.16272	Pycard
GO:0002820	negative regulation of adaptive immune response	42	1	0.18	810	0.16272	0.16272	Spn
GO:0001960	negative regulation of cytokine-mediated signaling pathway	42	1	0.18	811	0.16272	0.16272	Samhd1
GO:0045581	negative regulation of T cell differentiation	42	1	0.18	812	0.16272	0.16272	Runx3
GO:0019083	viral transcription	42	1	0.18	813	0.16272	0.16272	Ccl5
GO:0034113	heterotypic cell-cell adhesion	42	1	0.18	814	0.16272	0.16272	Itgb7
GO:0050850	positive regulation of calcium-mediated signaling	42	1	0.18	815	0.16272	0.16272	Cd8a
GO:0018198	peptidyl-cysteine modification	42	1	0.18	816	0.16272	0.16272	Zdhhc18
GO:0045321	leukocyte activation	732	12	3.08	31	0.16358	4.5e-05	Batf / Ccl5 / Cd8a / H2-T23 / Id2 / Lgals1 / Pou2f2 / Pycard / Rac2 / Runx3 / Selplg / Spn
GO:0009653	anatomical structure morphogenesis	2098	12	8.84	817	0.16493	0.16493	Actg1 / Anxa6 / Ccl5 / Dbnl / Id2 / Itgb7 / Rac2 / Rpl13a / Runx3 / S100a10 / S100a13 / Slc9a3r1
GO:0032502	developmental process	4568	27	19.25	253	0.16577	0.02482	Actg1 / Anxa6 / Aph1a / Batf / Ccl5 / Cd8a / Dbnl / H2-Q7 / H2-T23 / Hba-a1 / Hba-a2 / Id2 / Ifi27l2a / Itgb7 / Lgals1 / Phc2 / Pla2g16 / Plac8 / Pou2f2 / Rac2 / Rpl13a / Runx3 / S100a10 / S100a13 / Samhd1 / Slc9a3r1 / Spn
GO:0002440	production of molecular mediator of immune response	206	4	0.87	192	0.1658	0.01105	Batf / H2-T23 / Pou2f2 / Samhd1
GO:0010517	regulation of phospholipase activity	43	1	0.18	819	0.16626	0.16626	Ccl5
GO:0090199	regulation of release of cytochrome c from mitochondria	43	1	0.18	820	0.16626	0.16626	Pycard
GO:0031638	zymogen activation	43	1	0.18	821	0.16626	0.16626	Pycard
GO:0002437	inflammatory response to antigenic stimulus	43	1	0.18	822	0.16626	0.16626	Spn
GO:0090317	negative regulation of intracellular protein transport	43	1	0.18	823	0.16626	0.16626	Gbp4
GO:0060119	inner ear receptor cell development	43	1	0.18	824	0.16626	0.16626	Slc9a3r1
GO:0071675	regulation of mononuclear cell migration	43	1	0.18	825	0.16626	0.16626	Ccl5
GO:0001755	neural crest cell migration	44	1	0.19	827	0.16978	0.16978	Anxa6
GO:0002704	negative regulation of leukocyte mediated immunity	51	3	0.21	88	0.17156	0.00128	H2-T23 / Spn / Tap1
GO:0042982	amyloid precursor protein metabolic process	45	1	0.19	828	0.17329	0.17329	Aph1a
GO:0048247	lymphocyte chemotaxis	45	1	0.19	829	0.17329	0.17329	Ccl5
GO:0002548	monocyte chemotaxis	45	1	0.19	830	0.17329	0.17329	Ccl5
GO:0045646	regulation of erythrocyte differentiation	45	1	0.19	831	0.17329	0.17329	Id2
GO:0042088	T-helper 1 type immune response	45	1	0.19	832	0.17329	0.17329	Spn
GO:0032535	regulation of cellular component size	341	3	1.44	833	0.17349	0.17349	Gmfg / Pycard / Slc9a3r1
GO:0008154	actin polymerization or depolymerization	179	2	0.75	834	0.17411	0.17411	Gmfg / Pycard
GO:0050673	epithelial cell proliferation	343	3	1.45	835	0.17558	0.17558	Ccl5 / Id2 / Runx3
GO:0043281	regulation of cysteine-type endopeptidase activity involved in apoptotic process	180	2	0.76	836	0.17562	0.17562	Ifi27l2a / Pycard
GO:0048663	neuron fate commitment	46	1	0.19	838	0.17678	0.17678	Id2
GO:0060760	positive regulation of response to cytokine stimulus	46	1	0.19	839	0.17678	0.17678	Zbp1
GO:0060761	negative regulation of response to cytokine stimulus	46	1	0.19	840	0.17678	0.17678	Samhd1
GO:0051496	positive regulation of stress fiber assembly	46	1	0.19	841	0.17678	0.17678	S100a10
GO:1900024	regulation of substrate adhesion-dependent cell spreading	46	1	0.19	842	0.17678	0.17678	S100a10
GO:2000649	regulation of sodium ion transmembrane transporter activity	46	1	0.19	843	0.17678	0.17678	Slc9a3r1
GO:0046638	positive regulation of alpha-beta T cell differentiation	46	1	0.19	844	0.17678	0.17678	Runx3
GO:0002639	positive regulation of immunoglobulin production	46	1	0.19	845	0.17678	0.17678	H2-T23
GO:0051290	protein heterotetramerization	46	1	0.19	846	0.17678	0.17678	S100a10
GO:0032653	regulation of interleukin-10 production	46	1	0.19	847	0.17678	0.17678	Pycard
GO:0002520	immune system development	853	11	3.59	78	0.17835	0.00077	Batf / Ccl5 / Cd8a / Hba-a1 / Hba-a2 / Id2 / Lgals1 / Pou2f2 / Runx3 / Samhd1 / Spn
GO:0002204	somatic recombination of immunoglobulin genes involved in immune response	47	1	0.2	849	0.18026	0.18026	Batf
GO:0046718	viral entry into host cell	47	1	0.2	850	0.18026	0.18026	Lgals1
GO:0002208	somatic diversification of immunoglobulins involved in immune response	47	1	0.2	851	0.18026	0.18026	Batf
GO:0045744	negative regulation of G protein-coupled receptor signaling pathway	47	1	0.2	852	0.18026	0.18026	Ccl5
GO:0043370	regulation of CD4-positive, alpha-beta T cell differentiation	47	1	0.2	853	0.18026	0.18026	Runx3
GO:0001954	positive regulation of cell-matrix adhesion	47	1	0.2	854	0.18026	0.18026	S100a10
GO:0070098	chemokine-mediated signaling pathway	47	1	0.2	855	0.18026	0.18026	Ccl5
GO:0045190	isotype switching	47	1	0.2	856	0.18026	0.18026	Batf
GO:0060425	lung morphogenesis	47	1	0.2	857	0.18026	0.18026	Rpl13a
GO:0010812	negative regulation of cell-substrate adhesion	47	1	0.2	858	0.18026	0.18026	Lgals1
GO:0016485	protein processing	184	2	0.78	859	0.18166	0.18166	Aph1a / Pycard
GO:0031663	lipopolysaccharide-mediated signaling pathway	48	1	0.2	860	0.18373	0.18373	Ccl5
GO:0033619	membrane protein proteolysis	48	1	0.2	861	0.18373	0.18373	Aph1a
GO:0002066	columnar/cuboidal epithelial cell development	48	1	0.2	862	0.18373	0.18373	Slc9a3r1
GO:0030182	neuron differentiation	1110	7	4.68	863	0.18454	0.18454	Ccl5 / Dbnl / Id2 / Lgals1 / Rac2 / Runx3 / Slc9a3r1
GO:0072676	lymphocyte migration	82	4	0.35	61	0.18579	0.00039	Ccl5 / Itgb7 / Pycard / Spn
GO:0051098	regulation of binding	354	3	1.49	865	0.18716	0.18716	Gzma / Id2 / S100a10
GO:0031529	ruffle organization	49	1	0.21	866	0.18718	0.18718	Dbnl
GO:0042531	positive regulation of tyrosine phosphorylation of STAT protein	49	1	0.21	867	0.18718	0.18718	Ccl5
GO:0019730	antimicrobial humoral response	49	1	0.21	868	0.18718	0.18718	H2-T23
GO:0000726	non-recombinational repair	49	1	0.21	869	0.18718	0.18718	Rnf138
GO:0032413	negative regulation of ion transmembrane transporter activity	49	1	0.21	870	0.18718	0.18718	Slc9a3r1
GO:0032613	interleukin-10 production	49	1	0.21	871	0.18718	0.18718	Pycard
GO:0050776	regulation of immune response	633	9	2.67	87	0.18823	0.00125	H2-Q7 / H2-T23 / Pycard / Rac2 / Samhd1 / Spn / Tap1 / Trafd1 / Zbp1
GO:0042267	natural killer cell mediated cytotoxicity	56	3	0.24	101	0.18837	0.00168	Gzmb / H2-T23 / Tap1
GO:0032271	regulation of protein polymerization	189	2	0.8	873	0.18925	0.18925	Gmfg / Pycard
GO:0070374	positive regulation of ERK1 and ERK2 cascade	189	2	0.8	874	0.18925	0.18925	Ccl5 / Pycard
GO:0019882	antigen processing and presentation	83	5	0.35	29	0.18934	2.5e-05	H2-Q7 / H2-T23 / Pycard / Tap1 / Tapbp
GO:0030260	entry into host cell	50	1	0.21	875	0.19062	0.19062	Lgals1
GO:0006900	vesicle budding from membrane	50	1	0.21	876	0.19062	0.19062	S100a10
GO:0051828	entry into other organism involved in symbiotic interaction	50	1	0.21	877	0.19062	0.19062	Lgals1
GO:0051806	entry into cell of other organism involved in symbiotic interaction	50	1	0.21	878	0.19062	0.19062	Lgals1
GO:0044409	entry into host	50	1	0.21	879	0.19062	0.19062	Lgals1
GO:0055081	anion homeostasis	50	1	0.21	880	0.19062	0.19062	Slc9a3r1
GO:0050829	defense response to Gram-negative bacterium	50	1	0.21	881	0.19062	0.19062	Pycard
GO:0032651	regulation of interleukin-1 beta production	50	1	0.21	882	0.19062	0.19062	Pycard
GO:0032648	regulation of interferon-beta production	50	1	0.21	883	0.19062	0.19062	Pycard
GO:0050663	cytokine secretion	190	2	0.8	884	0.19077	0.19077	Pycard / S100a13
GO:0001933	negative regulation of protein phosphorylation	360	3	1.52	885	0.19357	0.19357	Gbp4 / Pycard / Slc9a3r1
GO:1903706	regulation of hemopoiesis	360	3	1.52	886	0.19357	0.19357	Ccl5 / Id2 / Runx3
GO:0045637	regulation of myeloid cell differentiation	192	2	0.81	887	0.19382	0.19382	Ccl5 / Id2
GO:0030239	myofibril assembly	51	1	0.21	888	0.19404	0.19404	Actg1
GO:0051893	regulation of focal adhesion assembly	51	1	0.21	889	0.19404	0.19404	S100a10
GO:0002886	regulation of myeloid leukocyte mediated immunity	51	1	0.21	890	0.19404	0.19404	Rac2
GO:0090109	regulation of cell-substrate junction assembly	51	1	0.21	891	0.19404	0.19404	S100a10
GO:0002228	natural killer cell mediated immunity	58	3	0.24	109	0.19499	0.00186	Gzmb / H2-T23 / Tap1
GO:0048666	neuron development	931	6	3.92	892	0.19693	0.19693	Dbnl / Id2 / Lgals1 / Rac2 / Runx3 / Slc9a3r1
GO:0032608	interferon-beta production	52	1	0.22	893	0.19745	0.19745	Pycard
GO:0033209	tumor necrosis factor-mediated signaling pathway	52	1	0.22	894	0.19745	0.19745	Pycard
GO:0016447	somatic recombination of immunoglobulin gene segments	52	1	0.22	895	0.19745	0.19745	Batf
GO:0014911	positive regulation of smooth muscle cell migration	52	1	0.22	896	0.19745	0.19745	Ccl5
GO:0043113	receptor clustering	52	1	0.22	897	0.19745	0.19745	Itgb7
GO:2000107	negative regulation of leukocyte apoptotic process	52	1	0.22	898	0.19745	0.19745	Ccl5
GO:0043547	positive regulation of GTPase activity	195	2	0.82	899	0.19842	0.19842	Ccl5 / S100a10
GO:0045088	regulation of innate immune response	233	6	0.98	62	0.19934	0.00043	H2-T23 / Pycard / Samhd1 / Tap1 / Trafd1 / Zbp1
GO:0006302	double-strand break repair	196	2	0.83	900	0.19995	0.19995	Rnf138 / Samhd1
GO:0014068	positive regulation of phosphatidylinositol 3-kinase signaling	53	1	0.22	902	0.20084	0.20084	Ccl5
GO:0050766	positive regulation of phagocytosis	53	1	0.22	903	0.20084	0.20084	Pycard
GO:0003229	ventricular cardiac muscle tissue development	53	1	0.22	904	0.20084	0.20084	Id2
GO:1903902	positive regulation of viral life cycle	53	1	0.22	905	0.20084	0.20084	Lgals1
GO:0032677	regulation of interleukin-8 production	53	1	0.22	906	0.20084	0.20084	Pycard
GO:2001233	regulation of apoptotic signaling pathway	367	3	1.55	907	0.20111	0.20111	Pycard / Runx3 / Slc9a3r1
GO:0048871	multicellular organismal homeostasis	368	3	1.55	909	0.2022	0.2022	Ccl5 / Plac8 / Rac2
GO:0048488	synaptic vesicle endocytosis	54	1	0.23	910	0.20422	0.20422	Actg1
GO:0071156	regulation of cell cycle arrest	54	1	0.23	911	0.20422	0.20422	Id2
GO:1902305	regulation of sodium ion transmembrane transport	54	1	0.23	912	0.20422	0.20422	Slc9a3r1
GO:0060350	endochondral bone morphogenesis	54	1	0.23	913	0.20422	0.20422	Anxa6
GO:0140238	presynaptic endocytosis	54	1	0.23	914	0.20422	0.20422	Actg1
GO:0045600	positive regulation of fat cell differentiation	54	1	0.23	915	0.20422	0.20422	Id2
GO:0060191	regulation of lipase activity	54	1	0.23	916	0.20422	0.20422	Ccl5
GO:0071345	cellular response to cytokine stimulus	588	13	2.48	16	0.20503	7.8e-07	Actg1 / Ccl5 / Gbp2 / Gbp4 / Gbp6 / H2-Q7 / Igtp / Il10rb / Pycard / Rnf138 / Rpl13a / Samhd1 / Zbp1
GO:0010647	positive regulation of cell communication	1351	8	5.69	918	0.20591	0.20591	Ccl5 / Cd8a / Pycard / Runx3 / S100a13 / S100a4 / Slc9a3r1 / Zbp1
GO:0048008	platelet-derived growth factor receptor signaling pathway	55	1	0.23	919	0.20759	0.20759	Slc9a3r1
GO:0032922	circadian regulation of gene expression	55	1	0.23	920	0.20759	0.20759	Id2
GO:0001836	release of cytochrome c from mitochondria	55	1	0.23	921	0.20759	0.20759	Pycard
GO:1990868	response to chemokine	55	1	0.23	922	0.20759	0.20759	Ccl5
GO:1990869	cellular response to chemokine	55	1	0.23	923	0.20759	0.20759	Ccl5
GO:0019080	viral gene expression	55	1	0.23	924	0.20759	0.20759	Ccl5
GO:0060563	neuroepithelial cell differentiation	55	1	0.23	925	0.20759	0.20759	Slc9a3r1
GO:0070231	T cell apoptotic process	55	1	0.23	926	0.20759	0.20759	Ccl5
GO:2000116	regulation of cysteine-type endopeptidase activity	201	2	0.85	927	0.20764	0.20764	Ifi27l2a / Pycard
GO:0023056	positive regulation of signaling	1356	8	5.71	928	0.20871	0.20871	Ccl5 / Cd8a / Pycard / Runx3 / S100a13 / S100a4 / Slc9a3r1 / Zbp1
GO:0033002	muscle cell proliferation	202	2	0.85	929	0.20918	0.20918	Ccl5 / Id2
GO:0032233	positive regulation of actin filament bundle assembly	56	1	0.24	930	0.21094	0.21094	S100a10
GO:0006446	regulation of translational initiation	56	1	0.24	931	0.21094	0.21094	Rpl13a
GO:0045576	mast cell activation	56	1	0.24	932	0.21094	0.21094	Rac2
GO:0046942	carboxylic acid transport	204	2	0.86	933	0.21227	0.21227	Slc9a3r1 / Slco3a1
GO:0015849	organic acid transport	205	2	0.86	935	0.21382	0.21382	Slc9a3r1 / Slco3a1
GO:0045665	negative regulation of neuron differentiation	205	2	0.86	936	0.21382	0.21382	Id2 / Lgals1
GO:0032637	interleukin-8 production	57	1	0.24	937	0.21428	0.21428	Pycard
GO:1903391	regulation of adherens junction organization	57	1	0.24	938	0.21428	0.21428	S100a10
GO:0060113	inner ear receptor cell differentiation	57	1	0.24	939	0.21428	0.21428	Slc9a3r1
GO:0043367	CD4-positive, alpha-beta T cell differentiation	75	3	0.32	140	0.2147	0.00387	Batf / Runx3 / Spn
GO:0050708	regulation of protein secretion	380	3	1.6	940	0.21531	0.21531	Ccl5 / H2-T23 / Pycard
GO:0097191	extrinsic apoptotic signaling pathway	206	2	0.87	941	0.21536	0.21536	Pycard / Runx3
GO:0010038	response to metal ion	206	2	0.87	942	0.21536	0.21536	Crip1 / Id2
GO:0045444	fat cell differentiation	206	2	0.87	943	0.21536	0.21536	Id2 / Plac8
GO:0090398	cellular senescence	58	1	0.24	945	0.2176	0.2176	Id2
GO:0032410	negative regulation of transporter activity	58	1	0.24	946	0.2176	0.2176	Slc9a3r1
GO:0008285	negative regulation of cell proliferation	570	4	2.4	947	0.21878	0.21878	Id2 / Runx3 / Slc9a3r1 / Spn
GO:0016444	somatic cell DNA recombination	59	1	0.25	948	0.22091	0.22091	Batf
GO:2000514	regulation of CD4-positive, alpha-beta T cell activation	59	1	0.25	949	0.22091	0.22091	Runx3
GO:0002562	somatic diversification of immune receptors via germline recombination within a single locus	59	1	0.25	950	0.22091	0.22091	Batf
GO:0045453	bone resorption	59	1	0.25	951	0.22091	0.22091	Rac2
GO:0043299	leukocyte degranulation	59	1	0.25	952	0.22091	0.22091	Rac2
GO:0042108	positive regulation of cytokine biosynthetic process	59	1	0.25	953	0.22091	0.22091	Spn
GO:0001822	kidney development	210	2	0.88	954	0.22156	0.22156	Aph1a / Id2
GO:0042113	B cell activation	241	4	1.02	215	0.22192	0.01865	Batf / Id2 / Lgals1 / Pou2f2
GO:0008544	epidermis development	211	2	0.89	956	0.22311	0.22311	Runx3 / Slc9a3r1
GO:0070509	calcium ion import	60	1	0.25	957	0.22421	0.22421	Anxa6
GO:0002532	production of molecular mediator involved in inflammatory response	60	1	0.25	958	0.22421	0.22421	Pycard
GO:0030330	DNA damage response, signal transduction by p53 class mediator	60	1	0.25	959	0.22421	0.22421	Batf
GO:0032418	lysosome localization	60	1	0.25	960	0.22421	0.22421	Rac2
GO:0051851	modification by host of symbiont morphology or physiology	61	1	0.26	963	0.22749	0.22749	Ccl5
GO:2001244	positive regulation of intrinsic apoptotic signaling pathway	61	1	0.26	964	0.22749	0.22749	Slc9a3r1
GO:0042490	mechanoreceptor differentiation	61	1	0.26	965	0.22749	0.22749	Slc9a3r1
GO:0032611	interleukin-1 beta production	61	1	0.26	966	0.22749	0.22749	Pycard
GO:0001775	cell activation	817	12	3.44	45	0.22792	0.00013	Batf / Ccl5 / Cd8a / H2-T23 / Id2 / Lgals1 / Pou2f2 / Pycard / Rac2 / Runx3 / Selplg / Spn
GO:0007166	cell surface receptor signaling pathway	1897	12	7.99	592	0.23075	0.09565	Aph1a / Ccl5 / Cd8a / Il10rb / Itgb7 / Pycard / Rnf138 / Runx3 / Samhd1 / Slc9a3r1 / Spn / Zbp1
GO:1904063	negative regulation of cation transmembrane transport	62	1	0.26	967	0.23076	0.23076	Slc9a3r1
GO:0042509	regulation of tyrosine phosphorylation of STAT protein	62	1	0.26	968	0.23076	0.23076	Ccl5
GO:0009060	aerobic respiration	62	1	0.26	969	0.23076	0.23076	Mdh1
GO:0070228	regulation of lymphocyte apoptotic process	62	1	0.26	970	0.23076	0.23076	Ccl5
GO:0030148	sphingolipid biosynthetic process	62	1	0.26	971	0.23076	0.23076	Cers4
GO:0042129	regulation of T cell proliferation	153	5	0.64	63	0.23091	0.00046	Ccl5 / H2-T23 / Pycard / Rac2 / Spn
GO:0048856	anatomical structure development	4283	25	18.05	346	0.23377	0.03758	Actg1 / Anxa6 / Aph1a / Batf / Ccl5 / Cd8a / Dbnl / H2-Q7 / H2-T23 / Hba-a1 / Hba-a2 / Id2 / Itgb7 / Lgals1 / Phc2 / Pla2g16 / Pou2f2 / Rac2 / Rpl13a / Runx3 / S100a10 / S100a13 / Samhd1 / Slc9a3r1 / Spn
GO:0030032	lamellipodium assembly	63	1	0.27	972	0.23401	0.23401	Rac2
GO:0007200	phospholipase C-activating G protein-coupled receptor signaling pathway	63	1	0.27	973	0.23401	0.23401	Slc9a3r1
GO:0042130	negative regulation of T cell proliferation	63	1	0.27	974	0.23401	0.23401	Spn
GO:0032652	regulation of interleukin-1 production	63	1	0.27	975	0.23401	0.23401	Pycard
GO:0009607	response to biotic stimulus	728	21	3.07	3	0.23501	7.3e-13	Batf / Ccl5 / Cd8a / Gbp2 / Gbp4 / Gbp6 / Gzma / H2-T23 / Hba-a1 / Hba-a2 / Ifi27l2a / Il10rb / Mx1 / Oas3 / Pla2g16 / Plac8 / Pycard / Rpl13a / Samhd1 / Spn / Zbp1
GO:0051223	regulation of protein transport	588	4	2.48	976	0.23502	0.23502	Ccl5 / Gbp4 / H2-T23 / Pycard
GO:0030217	T cell differentiation	242	4	1.02	218	0.2353	0.0189	Batf / Cd8a / Runx3 / Spn
GO:0031334	positive regulation of protein complex assembly	219	2	0.92	977	0.23556	0.23556	Gmfg / Pycard
GO:0042326	negative regulation of phosphorylation	399	3	1.68	978	0.23643	0.23643	Gbp4 / Pycard / Slc9a3r1
GO:0015908	fatty acid transport	64	1	0.27	979	0.23725	0.23725	Slco3a1
GO:0006672	ceramide metabolic process	64	1	0.27	980	0.23725	0.23725	Cers4
GO:0046427	positive regulation of JAK-STAT cascade	64	1	0.27	981	0.23725	0.23725	Ccl5
GO:0046637	regulation of alpha-beta T cell differentiation	64	1	0.27	982	0.23725	0.23725	Runx3
GO:0036465	synaptic vesicle recycling	64	1	0.27	983	0.23725	0.23725	Actg1
GO:0003014	renal system process	64	1	0.27	984	0.23725	0.23725	Slc9a3r1
GO:0045670	regulation of osteoclast differentiation	64	1	0.27	985	0.23725	0.23725	Ccl5
GO:0071674	mononuclear cell migration	64	1	0.27	986	0.23725	0.23725	Ccl5
GO:0043254	regulation of protein complex assembly	402	3	1.69	989	0.2398	0.2398	Gmfg / Pycard / Rpl13a
GO:0001738	morphogenesis of a polarized epithelium	65	1	0.27	990	0.24048	0.24048	Slc9a3r1
GO:0048708	astrocyte differentiation	65	1	0.27	991	0.24048	0.24048	Id2
GO:0032387	negative regulation of intracellular transport	65	1	0.27	992	0.24048	0.24048	Gbp4
GO:0060411	cardiac septum morphogenesis	65	1	0.27	993	0.24048	0.24048	Id2
GO:0032496	response to lipopolysaccharide	223	5	0.94	125	0.24103	0.00245	Ccl5 / Gbp2 / Gbp6 / Pycard / Rpl13a
GO:0002791	regulation of peptide secretion	404	3	1.7	994	0.24205	0.24205	Ccl5 / H2-T23 / Pycard
GO:0051702	interaction with symbiont	66	1	0.28	996	0.2437	0.2437	Ccl5
GO:0007260	tyrosine phosphorylation of STAT protein	66	1	0.28	997	0.2437	0.2437	Ccl5
GO:0002637	regulation of immunoglobulin production	66	1	0.28	998	0.2437	0.2437	H2-T23
GO:0045685	regulation of glial cell differentiation	66	1	0.28	999	0.2437	0.2437	Id2
GO:0051341	regulation of oxidoreductase activity	67	1	0.28	1000	0.2469	0.2469	Gzma
GO:0070373	negative regulation of ERK1 and ERK2 cascade	67	1	0.28	1001	0.2469	0.2469	Slc9a3r1
GO:0061180	mammary gland epithelium development	67	1	0.28	1002	0.2469	0.2469	Id2
GO:0014032	neural crest cell development	67	1	0.28	1003	0.2469	0.2469	Anxa6
GO:0048709	oligodendrocyte differentiation	67	1	0.28	1004	0.2469	0.2469	Id2
GO:0003281	ventricular septum development	67	1	0.28	1005	0.2469	0.2469	Id2
GO:0031397	negative regulation of protein ubiquitination	67	1	0.28	1006	0.2469	0.2469	Gbp4
GO:0043270	positive regulation of ion transport	228	2	0.96	1007	0.24962	0.24962	Ccl5 / Slc9a3r1
GO:0030279	negative regulation of ossification	68	1	0.29	1008	0.25009	0.25009	Id2
GO:0048041	focal adhesion assembly	68	1	0.29	1009	0.25009	0.25009	S100a10
GO:0032729	positive regulation of interferon-gamma production	68	1	0.29	1010	0.25009	0.25009	Pycard
GO:0007045	cell-substrate adherens junction assembly	68	1	0.29	1011	0.25009	0.25009	S100a10
GO:1904894	positive regulation of STAT cascade	68	1	0.29	1012	0.25009	0.25009	Ccl5
GO:0072001	renal system development	229	2	0.96	1013	0.25118	0.25118	Aph1a / Id2
GO:0046717	acid secretion	69	1	0.29	1014	0.25326	0.25326	Slc9a3r1
GO:0032088	negative regulation of NF-kappaB transcription factor activity	69	1	0.29	1015	0.25326	0.25326	Pycard
GO:0014015	positive regulation of gliogenesis	69	1	0.29	1016	0.25326	0.25326	Id2
GO:0010822	positive regulation of mitochondrion organization	69	1	0.29	1017	0.25326	0.25326	Pycard
GO:0048584	positive regulation of response to stimulus	1736	11	7.31	646	0.25697	0.10792	Ccl5 / Cd8a / H2-Q7 / H2-T23 / Pycard / Rac2 / Runx3 / S100a13 / S100a4 / Slc9a3r1 / Zbp1
GO:0090087	regulation of peptide transport	614	4	2.59	1018	0.25899	0.25899	Ccl5 / Gbp4 / H2-T23 / Pycard
GO:0014031	mesenchymal cell development	71	1	0.3	1019	0.25957	0.25957	Anxa6
GO:1902600	proton transmembrane transport	71	1	0.3	1020	0.25957	0.25957	Slc9a3r1
GO:0072332	intrinsic apoptotic signaling pathway by p53 class mediator	71	1	0.3	1021	0.25957	0.25957	Pycard
GO:0070201	regulation of establishment of protein localization	615	4	2.59	1023	0.25992	0.25992	Ccl5 / Gbp4 / H2-T23 / Pycard
GO:0042330	taxis	442	5	1.86	347	0.26017	0.03818	Ccl5 / Id2 / Rac2 / Rpl13a / Runx3
GO:0001909	leukocyte mediated cytotoxicity	109	4	0.46	84	0.26108	0.00114	Gzmb / H2-Q7 / H2-T23 / Tap1
GO:0044087	regulation of cellular component biogenesis	818	5	3.45	1025	0.26117	0.26117	Gmfg / Pycard / Rac2 / Rpl13a / S100a10
GO:0001959	regulation of cytokine-mediated signaling pathway	93	3	0.39	172	0.26167	0.00706	Pycard / Samhd1 / Zbp1
GO:0014033	neural crest cell differentiation	72	1	0.3	1026	0.26271	0.26271	Anxa6
GO:0042306	regulation of protein import into nucleus	72	1	0.3	1027	0.26271	0.26271	Gbp4
GO:0048864	stem cell development	72	1	0.3	1028	0.26271	0.26271	Anxa6
GO:0030101	natural killer cell activation	72	1	0.3	1029	0.26271	0.26271	Id2
GO:0035710	CD4-positive, alpha-beta T cell activation	91	3	0.38	171	0.26465	0.00665	Batf / Runx3 / Spn
GO:0050714	positive regulation of protein secretion	238	2	1	1030	0.26527	0.26527	H2-T23 / Pycard
GO:1903530	regulation of secretion by cell	621	4	2.62	1031	0.26553	0.26553	Ccl5 / H2-T23 / Pycard / Rac2
GO:0006641	triglyceride metabolic process	73	1	0.31	1032	0.26583	0.26583	Pla2g16
GO:0014910	regulation of smooth muscle cell migration	73	1	0.31	1033	0.26583	0.26583	Ccl5
GO:0040014	regulation of multicellular organism growth	73	1	0.31	1034	0.26583	0.26583	Plac8
GO:0051289	protein homotetramerization	73	1	0.31	1035	0.26583	0.26583	Samhd1
GO:0046649	lymphocyte activation	620	11	2.61	32	0.2662	4.8e-05	Batf / Ccl5 / Cd8a / H2-T23 / Id2 / Lgals1 / Pou2f2 / Pycard / Rac2 / Runx3 / Spn
GO:0048562	embryonic organ morphogenesis	239	2	1.01	1036	0.26684	0.26684	Id2 / Slc9a3r1
GO:0051604	protein maturation	240	2	1.01	1037	0.2684	0.2684	Aph1a / Pycard
GO:1901888	regulation of cell junction assembly	74	1	0.31	1038	0.26894	0.26894	S100a10
GO:0034644	cellular response to UV	74	1	0.31	1039	0.26894	0.26894	Crip1
GO:0034766	negative regulation of ion transmembrane transport	74	1	0.31	1040	0.26894	0.26894	Slc9a3r1
GO:0009416	response to light stimulus	242	2	1.02	1041	0.27154	0.27154	Crip1 / Id2
GO:0009306	protein secretion	471	5	1.98	387	0.27189	0.04794	Ccl5 / H2-T23 / Pou2f2 / Pycard / S100a13
GO:0050672	negative regulation of lymphocyte proliferation	75	1	0.32	1042	0.27203	0.27203	Spn
GO:0032945	negative regulation of mononuclear cell proliferation	75	1	0.32	1043	0.27203	0.27203	Spn
GO:0016999	antibiotic metabolic process	95	3	0.4	175	0.27368	0.00748	Hba-a1 / Hbb-bt / Mdh1
GO:0048699	generation of neurons	1253	7	5.28	1044	0.27424	0.27424	Ccl5 / Dbnl / Id2 / Lgals1 / Rac2 / Runx3 / Slc9a3r1
GO:1903321	negative regulation of protein modification by small protein conjugation or removal	76	1	0.32	1046	0.27512	0.27512	Gbp4
GO:0034333	adherens junction assembly	76	1	0.32	1047	0.27512	0.27512	S100a10
GO:0051492	regulation of stress fiber assembly	76	1	0.32	1048	0.27512	0.27512	S100a10
GO:0032755	positive regulation of interleukin-6 production	76	1	0.32	1049	0.27512	0.27512	Pycard
GO:0045445	myoblast differentiation	76	1	0.32	1050	0.27512	0.27512	Lgals1
GO:0072659	protein localization to plasma membrane	245	2	1.03	1051	0.27624	0.27624	S100a10 / Slc9a3r1
GO:0051704	multi-organism process	1546	24	6.51	11	0.27675	4.8e-09	Batf / Ccl5 / Cd8a / Gbp2 / Gbp4 / Gbp6 / Gzma / H2-Q7 / H2-T23 / Hba-a1 / Hba-a2 / Ifi27l2a / Il10rb / Lgals1 / Mx1 / Oas3 / Phc2 / Pla2g16 / Plac8 / Pycard / Rpl13a / Samhd1 / Spn / Zbp1
GO:0030097	hemopoiesis	769	10	3.24	89	0.27774	0.0013	Batf / Ccl5 / Cd8a / Hba-a1 / Hba-a2 / Id2 / Lgals1 / Pou2f2 / Runx3 / Spn
GO:0007189	adenylate cyclase-activating G protein-coupled receptor signaling pathway	77	1	0.32	1052	0.27819	0.27819	Slc9a3r1
GO:0070664	negative regulation of leukocyte proliferation	77	1	0.32	1053	0.27819	0.27819	Spn
GO:0050764	regulation of phagocytosis	77	1	0.32	1054	0.27819	0.27819	Pycard
GO:0002181	cytoplasmic translation	77	1	0.32	1055	0.27819	0.27819	Rpl13a
GO:1904589	regulation of protein import	77	1	0.32	1056	0.27819	0.27819	Gbp4
GO:0031175	neuron projection development	841	5	3.54	1058	0.27991	0.27991	Dbnl / Lgals1 / Rac2 / Runx3 / Slc9a3r1
GO:0033077	T cell differentiation in thymus	78	1	0.33	1059	0.28124	0.28124	Spn
GO:0007044	cell-substrate junction assembly	78	1	0.33	1060	0.28124	0.28124	S100a10
GO:0120162	positive regulation of cold-induced thermogenesis	78	1	0.33	1061	0.28124	0.28124	Plac8
GO:0070227	lymphocyte apoptotic process	78	1	0.33	1062	0.28124	0.28124	Ccl5
GO:0002028	regulation of sodium ion transport	78	1	0.33	1063	0.28124	0.28124	Slc9a3r1
GO:0048524	positive regulation of viral process	78	1	0.33	1064	0.28124	0.28124	Lgals1
GO:0032103	positive regulation of response to external stimulus	249	2	1.05	1065	0.2825	0.2825	Ccl5 / Rac2
GO:0007229	integrin-mediated signaling pathway	79	1	0.33	1066	0.28429	0.28429	Itgb7
GO:0042472	inner ear morphogenesis	79	1	0.33	1067	0.28429	0.28429	Slc9a3r1
GO:0034097	response to cytokine	672	13	2.83	24	0.28511	3.5e-06	Actg1 / Ccl5 / Gbp2 / Gbp4 / Gbp6 / H2-Q7 / Igtp / Il10rb / Pycard / Rnf138 / Rpl13a / Samhd1 / Zbp1
GO:0030218	erythrocyte differentiation	111	3	0.47	195	0.28573	0.01144	Hba-a1 / Hba-a2 / Id2
GO:0022604	regulation of cell morphogenesis	443	3	1.87	1068	0.28659	0.28659	S100a10 / S100a13 / Slc9a3r1
GO:0042752	regulation of circadian rhythm	80	1	0.34	1069	0.28732	0.28732	Id2
GO:0051817	modification of morphology or physiology of other organism involved in symbiotic interaction	80	1	0.34	1070	0.28732	0.28732	Ccl5
GO:0046849	bone remodeling	80	1	0.34	1071	0.28732	0.28732	Rac2
GO:0014909	smooth muscle cell migration	80	1	0.34	1072	0.28732	0.28732	Ccl5
GO:0097581	lamellipodium organization	80	1	0.34	1073	0.28732	0.28732	Rac2
GO:0008344	adult locomotory behavior	80	1	0.34	1074	0.28732	0.28732	Id2
GO:0032102	negative regulation of response to external stimulus	254	2	1.07	1075	0.29032	0.29032	Pycard / Spn
GO:0035725	sodium ion transmembrane transport	81	1	0.34	1076	0.29034	0.29034	Slc9a3r1
GO:0002237	response to molecule of bacterial origin	240	5	1.01	137	0.29104	0.00336	Ccl5 / Gbp2 / Gbp6 / Pycard / Rpl13a
GO:0046903	secretion	909	7	3.83	556	0.2911	0.08656	Ccl5 / H2-T23 / Pou2f2 / Pycard / Rac2 / S100a13 / Slc9a3r1
GO:0034504	protein localization to nucleus	255	2	1.07	1077	0.29189	0.29189	Gbp2 / Gbp4
GO:0090066	regulation of anatomical structure size	448	3	1.89	1078	0.29237	0.29237	Gmfg / Pycard / Slc9a3r1
GO:0006497	protein lipidation	82	1	0.35	1079	0.29335	0.29335	Zdhhc18
GO:0001942	hair follicle development	82	1	0.35	1080	0.29335	0.29335	Runx3
GO:2000177	regulation of neural precursor cell proliferation	82	1	0.35	1081	0.29335	0.29335	Id2
GO:0002444	myeloid leukocyte mediated immunity	82	1	0.35	1082	0.29335	0.29335	Rac2
GO:0021782	glial cell development	82	1	0.35	1083	0.29335	0.29335	Id2
GO:0048565	digestive tract development	82	1	0.35	1084	0.29335	0.29335	Id2
GO:0002793	positive regulation of peptide secretion	256	2	1.08	1086	0.29345	0.29345	H2-T23 / Pycard
GO:0042981	regulation of apoptotic process	1282	7	5.4	1087	0.29384	0.29384	Ccl5 / Gzma / Ifi27l2a / Plac8 / Pycard / Runx3 / Slc9a3r1
GO:0060759	regulation of response to cytokine stimulus	104	3	0.44	184	0.29432	0.00959	Pycard / Samhd1 / Zbp1
GO:0060349	bone morphogenesis	83	1	0.35	1088	0.29634	0.29634	Anxa6
GO:0050848	regulation of calcium-mediated signaling	83	1	0.35	1089	0.29634	0.29634	Cd8a
GO:0052548	regulation of endopeptidase activity	258	2	1.09	1090	0.29658	0.29658	Ifi27l2a / Pycard
GO:0050768	negative regulation of neurogenesis	258	2	1.09	1091	0.29658	0.29658	Id2 / Lgals1
GO:0002821	positive regulation of adaptive immune response	117	3	0.49	199	0.29742	0.01318	H2-Q7 / H2-T23 / Pycard
GO:0098773	skin epidermis development	84	1	0.35	1092	0.29933	0.29933	Runx3
GO:0022404	molting cycle process	84	1	0.35	1093	0.29933	0.29933	Runx3
GO:0022405	hair cycle process	84	1	0.35	1094	0.29933	0.29933	Runx3
GO:0043648	dicarboxylic acid metabolic process	84	1	0.35	1095	0.29933	0.29933	Mdh1
GO:0008284	positive regulation of cell proliferation	788	8	3.32	214	0.30146	0.01702	Ccl5 / H2-T23 / Id2 / Plac8 / Pycard / Rac2 / S100a13 / Spn
GO:0042770	signal transduction in response to DNA damage	85	1	0.36	1096	0.30229	0.30229	Batf
GO:0042158	lipoprotein biosynthetic process	85	1	0.36	1097	0.30229	0.30229	Zdhhc18
GO:0046632	alpha-beta T cell differentiation	104	3	0.44	185	0.30292	0.00959	Batf / Runx3 / Spn
GO:0030183	B cell differentiation	112	3	0.47	196	0.30306	0.01172	Id2 / Lgals1 / Pou2f2
GO:0002790	peptide secretion	499	5	2.1	447	0.30321	0.05867	Ccl5 / H2-T23 / Pou2f2 / Pycard / S100a13
GO:0051249	regulation of lymphocyte activation	390	8	1.64	53	0.30349	0.00022	Ccl5 / H2-T23 / Id2 / Lgals1 / Pycard / Rac2 / Runx3 / Spn
GO:0045582	positive regulation of T cell differentiation	86	1	0.36	1098	0.30525	0.30525	Runx3
GO:0071482	cellular response to light stimulus	86	1	0.36	1099	0.30525	0.30525	Crip1
GO:0043067	regulation of programmed cell death	1299	7	5.47	1100	0.30549	0.30549	Ccl5 / Gzma / Ifi27l2a / Plac8 / Pycard / Runx3 / Slc9a3r1
GO:0002687	positive regulation of leukocyte migration	122	4	0.51	102	0.30736	0.00173	Ccl5 / Pycard / Rac2 / Spn
GO:0001655	urogenital system development	265	2	1.12	1101	0.30751	0.30751	Aph1a / Id2
GO:0110020	regulation of actomyosin structure organization	87	1	0.37	1102	0.3082	0.3082	S100a10
GO:0098542	defense response to other organism	381	15	1.61	6	0.30875	3.6e-11	Batf / Ccl5 / Cd8a / Gbp2 / Gbp4 / Gbp6 / H2-T23 / Il10rb / Mx1 / Oas3 / Plac8 / Pycard / Samhd1 / Spn / Zbp1
GO:0048534	hematopoietic or lymphoid organ development	805	10	3.39	106	0.3089	0.00182	Batf / Ccl5 / Cd8a / Hba-a1 / Hba-a2 / Id2 / Lgals1 / Pou2f2 / Runx3 / Spn
GO:0051493	regulation of cytoskeleton organization	465	3	1.96	1104	0.31206	0.31206	Gmfg / Pycard / S100a10
GO:0030038	contractile actin filament bundle assembly	89	1	0.38	1106	0.31405	0.31405	S100a10
GO:0043149	stress fiber assembly	89	1	0.38	1107	0.31405	0.31405	S100a10
GO:0010927	cellular component assembly involved in morphogenesis	89	1	0.38	1108	0.31405	0.31405	Actg1
GO:0048667	cell morphogenesis involved in neuron differentiation	469	3	1.98	1109	0.31671	0.31671	Id2 / Runx3 / Slc9a3r1
GO:0031532	actin cytoskeleton reorganization	90	1	0.38	1110	0.31696	0.31696	Gmfg
GO:0002702	positive regulation of production of molecular mediator of immune response	90	1	0.38	1111	0.31696	0.31696	H2-T23
GO:0032231	regulation of actin filament bundle assembly	90	1	0.38	1112	0.31696	0.31696	S100a10
GO:0006612	protein targeting to membrane	90	1	0.38	1113	0.31696	0.31696	Zdhhc18
GO:0034101	erythrocyte homeostasis	122	3	0.51	205	0.31735	0.01474	Hba-a1 / Hba-a2 / Id2
GO:0007565	female pregnancy	91	1	0.38	1114	0.31985	0.31985	H2-Q7
GO:2000106	regulation of leukocyte apoptotic process	91	1	0.38	1115	0.31985	0.31985	Ccl5
GO:0014812	muscle cell migration	91	1	0.38	1116	0.31985	0.31985	Ccl5
GO:0007569	cell aging	92	1	0.39	1117	0.32274	0.32274	Id2
GO:0055123	digestive system development	92	1	0.39	1118	0.32274	0.32274	Id2
GO:0042035	regulation of cytokine biosynthetic process	92	1	0.39	1119	0.32274	0.32274	Spn
GO:0042110	T cell activation	423	9	1.78	36	0.32558	6.4e-05	Batf / Ccl5 / Cd8a / H2-T23 / Lgals1 / Pycard / Rac2 / Runx3 / Spn
GO:0042098	T cell proliferation	186	5	0.78	83	0.32583	0.0011	Ccl5 / H2-T23 / Pycard / Rac2 / Spn
GO:0001906	cell killing	132	4	0.56	123	0.32677	0.00231	Gzmb / H2-Q7 / H2-T23 / Tap1
GO:0051961	negative regulation of nervous system development	278	2	1.17	1120	0.32772	0.32772	Id2 / Lgals1
GO:0120034	positive regulation of plasma membrane bounded cell projection assembly	94	1	0.4	1121	0.32847	0.32847	Rac2
GO:0006639	acylglycerol metabolic process	94	1	0.4	1122	0.32847	0.32847	Pla2g16
GO:0051283	negative regulation of sequestering of calcium ion	94	1	0.4	1123	0.32847	0.32847	Anxa6
GO:0065003	protein-containing complex assembly	1479	12	6.23	220	0.32913	0.01907	Anxa6 / Ccl5 / Dbnl / Gmfg / Hba-a1 / Hbb-bt / Mx1 / Pycard / Rpl13a / S100a10 / Samhd1 / Tapbp
GO:0010563	negative regulation of phosphorus metabolic process	480	3	2.02	1124	0.32949	0.32949	Gbp4 / Pycard / Slc9a3r1
GO:0045936	negative regulation of phosphate metabolic process	480	3	2.02	1125	0.32949	0.32949	Gbp4 / Pycard / Slc9a3r1
GO:0022008	neurogenesis	1334	7	5.62	1126	0.32978	0.32978	Ccl5 / Dbnl / Id2 / Lgals1 / Rac2 / Runx3 / Slc9a3r1
GO:0042471	ear morphogenesis	95	1	0.4	1127	0.33132	0.33132	Slc9a3r1
GO:2000045	regulation of G1/S transition of mitotic cell cycle	95	1	0.4	1128	0.33132	0.33132	Id2
GO:0051282	regulation of sequestering of calcium ion	95	1	0.4	1129	0.33132	0.33132	Anxa6
GO:0006873	cellular ion homeostasis	482	3	2.03	1130	0.33181	0.33181	Anxa6 / Ccl5 / Slc9a3r1
GO:0048640	negative regulation of developmental growth	96	1	0.4	1131	0.33415	0.33415	Plac8
GO:0006638	neutral lipid metabolic process	96	1	0.4	1132	0.33415	0.33415	Pla2g16
GO:0030316	osteoclast differentiation	96	1	0.4	1133	0.33415	0.33415	Ccl5
GO:0042303	molting cycle	96	1	0.4	1134	0.33415	0.33415	Runx3
GO:0035821	modification of morphology or physiology of other organism	96	1	0.4	1135	0.33415	0.33415	Ccl5
GO:0042633	hair cycle	96	1	0.4	1136	0.33415	0.33415	Runx3
GO:0051208	sequestering of calcium ion	96	1	0.4	1137	0.33415	0.33415	Anxa6
GO:0090090	negative regulation of canonical Wnt signaling pathway	97	1	0.41	1138	0.33698	0.33698	Slc9a3r1
GO:0002065	columnar/cuboidal epithelial cell differentiation	97	1	0.41	1139	0.33698	0.33698	Slc9a3r1
GO:0034763	negative regulation of transmembrane transport	97	1	0.41	1140	0.33698	0.33698	Slc9a3r1
GO:0032649	regulation of interferon-gamma production	97	1	0.41	1141	0.33698	0.33698	Pycard
GO:0015711	organic anion transport	284	2	1.2	1142	0.337	0.337	Slc9a3r1 / Slco3a1
GO:0007010	cytoskeleton organization	1127	6	4.75	1143	0.338	0.338	Actg1 / Gmfg / Pycard / Rac2 / S100a10 / Slc9a3r1
GO:0001952	regulation of cell-matrix adhesion	98	1	0.41	1144	0.33979	0.33979	S100a10
GO:0046467	membrane lipid biosynthetic process	98	1	0.41	1145	0.33979	0.33979	Cers4
GO:0071901	negative regulation of protein serine/threonine kinase activity	98	1	0.41	1146	0.33979	0.33979	Pycard
GO:0006665	sphingolipid metabolic process	99	1	0.42	1147	0.34259	0.34259	Cers4
GO:0046425	regulation of JAK-STAT cascade	99	1	0.42	1148	0.34259	0.34259	Ccl5
GO:0045621	positive regulation of lymphocyte differentiation	99	1	0.42	1149	0.34259	0.34259	Runx3
GO:0043085	positive regulation of catalytic activity	918	5	3.87	1150	0.34439	0.34439	Aph1a / Ccl5 / Ifi27l2a / Pycard / S100a10
GO:0003279	cardiac septum development	100	1	0.42	1151	0.34538	0.34538	Id2
GO:1901136	carbohydrate derivative catabolic process	100	1	0.42	1152	0.34538	0.34538	Samhd1
GO:0050678	regulation of epithelial cell proliferation	290	2	1.22	1153	0.34624	0.34624	Ccl5 / Runx3
GO:0010721	negative regulation of cell development	291	2	1.23	1154	0.34778	0.34778	Id2 / Lgals1
GO:0051928	positive regulation of calcium ion transport	101	1	0.43	1155	0.34816	0.34816	Ccl5
GO:0006413	translational initiation	101	1	0.43	1156	0.34816	0.34816	Rpl13a
GO:1990778	protein localization to cell periphery	292	2	1.23	1157	0.34932	0.34932	S100a10 / Slc9a3r1
GO:0045862	positive regulation of proteolysis	293	2	1.23	1158	0.35085	0.35085	Ifi27l2a / Pycard
GO:0008637	apoptotic mitochondrial changes	102	1	0.43	1159	0.35092	0.35092	Pycard
GO:0008277	regulation of G protein-coupled receptor signaling pathway	103	1	0.43	1161	0.35368	0.35368	Ccl5
GO:0061025	membrane fusion	103	1	0.43	1162	0.35368	0.35368	Mx1
GO:1904892	regulation of STAT cascade	103	1	0.43	1163	0.35368	0.35368	Ccl5
GO:0042089	cytokine biosynthetic process	103	1	0.43	1164	0.35368	0.35368	Spn
GO:0031400	negative regulation of protein modification process	502	3	2.12	1166	0.35505	0.35505	Gbp4 / Pycard / Slc9a3r1
GO:0006887	exocytosis	296	2	1.25	1167	0.35545	0.35545	Ccl5 / Rac2
GO:0052547	regulation of peptidase activity	296	2	1.25	1168	0.35545	0.35545	Ifi27l2a / Pycard
GO:0007605	sensory perception of sound	104	1	0.44	1169	0.35642	0.35642	Slc9a3r1
GO:0034332	adherens junction organization	105	1	0.44	1170	0.35915	0.35915	S100a10
GO:0009166	nucleotide catabolic process	105	1	0.44	1171	0.35915	0.35915	Samhd1
GO:0042157	lipoprotein metabolic process	105	1	0.44	1172	0.35915	0.35915	Zdhhc18
GO:1903828	negative regulation of cellular protein localization	105	1	0.44	1173	0.35915	0.35915	Gbp4
GO:0051701	interaction with host	106	1	0.45	1174	0.36187	0.36187	Lgals1
GO:0048812	neuron projection morphogenesis	509	3	2.14	1175	0.36317	0.36317	Dbnl / Rac2 / Runx3
GO:0044706	multi-multicellular organism process	107	1	0.45	1177	0.36458	0.36458	H2-Q7
GO:0042107	cytokine metabolic process	107	1	0.45	1178	0.36458	0.36458	Spn
GO:0010811	positive regulation of cell-substrate adhesion	107	1	0.45	1179	0.36458	0.36458	S100a10
GO:0002698	negative regulation of immune effector process	116	3	0.49	198	0.36567	0.01288	H2-T23 / Spn / Tap1
GO:1902806	regulation of cell cycle G1/S phase transition	108	1	0.46	1180	0.36728	0.36728	Id2
GO:0045667	regulation of osteoblast differentiation	108	1	0.46	1181	0.36728	0.36728	Id2
GO:0050670	regulation of lymphocyte proliferation	202	5	0.85	96	0.36761	0.00159	Ccl5 / H2-T23 / Pycard / Rac2 / Spn
GO:0050729	positive regulation of inflammatory response	109	1	0.46	1183	0.36996	0.36996	Ccl5
GO:0071887	leukocyte apoptotic process	109	1	0.46	1184	0.36996	0.36996	Ccl5
GO:0006937	regulation of muscle contraction	110	1	0.46	1186	0.37264	0.37264	Anxa6
GO:0032944	regulation of mononuclear cell proliferation	204	5	0.86	98	0.37265	0.00166	Ccl5 / H2-T23 / Pycard / Rac2 / Spn
GO:0010720	positive regulation of cell development	520	3	2.19	1187	0.3759	0.3759	Ccl5 / Id2 / S100a10
GO:0016192	vesicle-mediated transport	1177	6	4.96	1188	0.37645	0.37645	Actg1 / Ccl5 / Dbnl / Pycard / Rac2 / S100a10
GO:0120039	plasma membrane bounded cell projection morphogenesis	522	3	2.2	1190	0.37821	0.37821	Dbnl / Rac2 / Runx3
GO:0006816	calcium ion transport	311	2	1.31	1191	0.37827	0.37827	Anxa6 / Ccl5
GO:0019932	second-messenger-mediated signaling	311	2	1.31	1192	0.37827	0.37827	Cd8a / Slc9a3r1
GO:0042592	homeostatic process	1478	9	6.23	818	0.37946	0.16582	Anxa6 / Ccl5 / Hba-a1 / Hba-a2 / Id2 / Plac8 / Rac2 / Rpl13a / Slc9a3r1
GO:0051336	regulation of hydrolase activity	786	6	3.31	655	0.37997	0.11234	Ccl5 / Gzma / Ifi27l2a / Oas3 / Pycard / S100a10
GO:0002244	hematopoietic progenitor cell differentiation	113	1	0.48	1193	0.3806	0.3806	Batf
GO:0048858	cell projection morphogenesis	525	3	2.21	1194	0.38167	0.38167	Dbnl / Rac2 / Runx3
GO:0010638	positive regulation of organelle organization	526	3	2.22	1195	0.38282	0.38282	Gmfg / Pycard / S100a10
GO:0071248	cellular response to metal ion	114	1	0.48	1196	0.38323	0.38323	Id2
GO:0014013	regulation of gliogenesis	114	1	0.48	1197	0.38323	0.38323	Id2
GO:1901292	nucleoside phosphate catabolic process	114	1	0.48	1198	0.38323	0.38323	Samhd1
GO:0019933	cAMP-mediated signaling	114	1	0.48	1199	0.38323	0.38323	Slc9a3r1
GO:0042127	regulation of cell proliferation	1349	10	5.68	429	0.38368	0.05421	Ccl5 / H2-T23 / Id2 / Plac8 / Pycard / Rac2 / Runx3 / S100a13 / Slc9a3r1 / Spn
GO:0002706	regulation of lymphocyte mediated immunity	154	4	0.65	142	0.38422	0.00402	H2-Q7 / H2-T23 / Spn / Tap1
GO:0070663	regulation of leukocyte proliferation	209	5	0.88	107	0.38508	0.00185	Ccl5 / H2-T23 / Pycard / Rac2 / Spn
GO:0010959	regulation of metal ion transport	316	2	1.33	1200	0.38581	0.38581	Ccl5 / Slc9a3r1
GO:0017148	negative regulation of translation	115	1	0.48	1201	0.38585	0.38585	Rpl13a
GO:0045598	regulation of fat cell differentiation	115	1	0.48	1202	0.38585	0.38585	Id2
GO:0051092	positive regulation of NF-kappaB transcription factor activity	115	1	0.48	1203	0.38585	0.38585	Pycard
GO:0003231	cardiac ventricle development	115	1	0.48	1204	0.38585	0.38585	Id2
GO:0006897	endocytosis	529	3	2.23	1205	0.38628	0.38628	Actg1 / Dbnl / Pycard
GO:0050680	negative regulation of epithelial cell proliferation	116	1	0.49	1206	0.38846	0.38846	Runx3
GO:0022612	gland morphogenesis	116	1	0.49	1207	0.38846	0.38846	Slc9a3r1
GO:0071236	cellular response to antibiotic	116	1	0.49	1208	0.38846	0.38846	Crip1
GO:1990823	response to leukemia inhibitory factor	116	1	0.49	1209	0.38846	0.38846	Rnf138
GO:1990830	cellular response to leukemia inhibitory factor	116	1	0.49	1210	0.38846	0.38846	Rnf138
GO:0003206	cardiac chamber morphogenesis	116	1	0.49	1211	0.38846	0.38846	Id2
GO:0006954	inflammatory response	532	3	2.24	1212	0.38973	0.38973	Ccl5 / Pycard / Spn
GO:0010941	regulation of cell death	1420	7	5.98	1213	0.39069	0.39069	Ccl5 / Gzma / Ifi27l2a / Plac8 / Pycard / Runx3 / Slc9a3r1
GO:0030879	mammary gland development	117	1	0.49	1214	0.39105	0.39105	Id2
GO:0007259	JAK-STAT cascade	117	1	0.49	1215	0.39105	0.39105	Ccl5
GO:0007416	synapse assembly	118	1	0.5	1216	0.39364	0.39364	Dbnl
GO:0008217	regulation of blood pressure	118	1	0.5	1217	0.39364	0.39364	Id2
GO:0032675	regulation of interleukin-6 production	118	1	0.5	1218	0.39364	0.39364	Pycard
GO:0046822	regulation of nucleocytoplasmic transport	119	1	0.5	1219	0.39622	0.39622	Gbp4
GO:1900180	regulation of protein localization to nucleus	119	1	0.5	1220	0.39622	0.39622	Gbp4
GO:0046330	positive regulation of JNK cascade	120	1	0.51	1221	0.39878	0.39878	Pycard
GO:0031214	biomineral tissue development	120	1	0.51	1222	0.39878	0.39878	Anxa6
GO:0097696	STAT cascade	120	1	0.51	1223	0.39878	0.39878	Ccl5
GO:0002822	regulation of adaptive immune response based on somatic recombination of immune receptors built from immunoglobulin superfamily domains	155	3	0.65	275	0.3993	0.02757	H2-Q7 / H2-T23 / Spn
GO:0030010	establishment of cell polarity	121	1	0.51	1224	0.40134	0.40134	Slc9a3r1
GO:1902904	negative regulation of supramolecular fiber organization	121	1	0.51	1225	0.40134	0.40134	Gmfg
GO:0030534	adult behavior	121	1	0.51	1226	0.40134	0.40134	Id2
GO:0002262	myeloid cell homeostasis	154	3	0.65	272	0.40173	0.02711	Hba-a1 / Hba-a2 / Id2
GO:0007186	G protein-coupled receptor signaling pathway	544	3	2.29	1228	0.4035	0.4035	Ccl5 / Rac2 / Slc9a3r1
GO:0106106	cold-induced thermogenesis	122	1	0.51	1229	0.40388	0.40388	Plac8
GO:0050715	positive regulation of cytokine secretion	122	1	0.51	1230	0.40388	0.40388	Pycard
GO:0120161	regulation of cold-induced thermogenesis	122	1	0.51	1231	0.40388	0.40388	Plac8
GO:0030178	negative regulation of Wnt signaling pathway	122	1	0.51	1232	0.40388	0.40388	Slc9a3r1
GO:0031333	negative regulation of protein complex assembly	122	1	0.51	1233	0.40388	0.40388	Rpl13a
GO:0002694	regulation of leukocyte activation	463	8	1.95	75	0.4049	0.00069	Ccl5 / H2-T23 / Id2 / Lgals1 / Pycard / Rac2 / Runx3 / Spn
GO:0032990	cell part morphogenesis	546	3	2.3	1234	0.40579	0.40579	Dbnl / Rac2 / Runx3
GO:0009913	epidermal cell differentiation	123	1	0.52	1235	0.40641	0.40641	Slc9a3r1
GO:0043271	negative regulation of ion transport	123	1	0.52	1236	0.40641	0.40641	Slc9a3r1
GO:0032940	secretion by cell	819	6	3.45	716	0.4065	0.12961	Ccl5 / H2-T23 / Pou2f2 / Pycard / Rac2 / S100a13
GO:0120036	plasma membrane bounded cell projection organization	1219	6	5.14	1240	0.40893	0.40893	Ccl5 / Dbnl / Lgals1 / Rac2 / Runx3 / Slc9a3r1
GO:0032635	interleukin-6 production	124	1	0.52	1241	0.40894	0.40894	Pycard
GO:0007188	adenylate cyclase-modulating G protein-coupled receptor signaling pathway	124	1	0.52	1242	0.40894	0.40894	Slc9a3r1
GO:0010821	regulation of mitochondrion organization	124	1	0.52	1243	0.40894	0.40894	Pycard
GO:0051896	regulation of protein kinase B signaling	125	1	0.53	1244	0.41145	0.41145	Slc9a3r1
GO:0007050	cell cycle arrest	125	1	0.53	1245	0.41145	0.41145	Id2
GO:0008104	protein localization	2231	12	9.4	955	0.41211	0.22228	Ccl5 / Gbp2 / Gbp4 / H2-T23 / Itgb7 / Pou2f2 / Pycard / S100a10 / S100a13 / Slc9a3r1 / Tap1 / Zdhhc18
GO:0046496	nicotinamide nucleotide metabolic process	126	1	0.53	1246	0.41395	0.41395	Mdh1
GO:0034767	positive regulation of ion transmembrane transport	126	1	0.53	1247	0.41395	0.41395	Slc9a3r1
GO:0002700	regulation of production of molecular mediator of immune response	127	1	0.54	1248	0.41644	0.41644	H2-T23
GO:0050954	sensory perception of mechanical stimulus	127	1	0.54	1249	0.41644	0.41644	Slc9a3r1
GO:0016055	Wnt signaling pathway	337	2	1.42	1250	0.41703	0.41703	Rnf138 / Slc9a3r1
GO:0098771	inorganic ion homeostasis	556	3	2.34	1251	0.41719	0.41719	Anxa6 / Ccl5 / Slc9a3r1
GO:0051090	regulation of DNA-binding transcription factor activity	338	2	1.42	1252	0.4185	0.4185	Id2 / Pycard
GO:0019362	pyridine nucleotide metabolic process	128	1	0.54	1253	0.41892	0.41892	Mdh1
GO:0198738	cell-cell signaling by wnt	339	2	1.43	1254	0.41996	0.41996	Rnf138 / Slc9a3r1
GO:0033036	macromolecule localization	2484	13	10.47	987	0.42096	0.23844	Ccl5 / Gbp2 / Gbp4 / H2-T23 / Itgb7 / Pou2f2 / Pycard / S100a10 / S100a13 / Slc9a3r1 / Slco3a1 / Tap1 / Zdhhc18
GO:0051494	negative regulation of cytoskeleton organization	129	1	0.54	1255	0.42139	0.42139	Gmfg
GO:1990845	adaptive thermogenesis	129	1	0.54	1256	0.42139	0.42139	Plac8
GO:0006874	cellular calcium ion homeostasis	340	2	1.43	1257	0.42143	0.42143	Anxa6 / Ccl5
GO:0001667	ameboidal-type cell migration	341	2	1.44	1258	0.42289	0.42289	Anxa6 / Itgb7
GO:0006261	DNA-dependent DNA replication	130	1	0.55	1259	0.42385	0.42385	Samhd1
GO:0034249	negative regulation of cellular amide metabolic process	130	1	0.55	1260	0.42385	0.42385	Rpl13a
GO:1903305	regulation of regulated secretory pathway	131	1	0.55	1261	0.4263	0.4263	Rac2
GO:0098742	cell-cell adhesion via plasma-membrane adhesion molecules	131	1	0.55	1262	0.4263	0.4263	Lgals1
GO:0006959	humoral immune response	131	1	0.55	1263	0.4263	0.4263	H2-T23
GO:0009887	animal organ morphogenesis	789	4	3.32	1264	0.42718	0.42718	Anxa6 / Id2 / Rpl13a / Slc9a3r1
GO:0048732	gland development	344	2	1.45	1265	0.42727	0.42727	Id2 / Slc9a3r1
GO:0009411	response to UV	132	1	0.56	1267	0.42874	0.42874	Crip1
GO:0050796	regulation of insulin secretion	132	1	0.56	1268	0.42874	0.42874	Ccl5
GO:0072524	pyridine-containing compound metabolic process	132	1	0.56	1269	0.42874	0.42874	Mdh1
GO:0009266	response to temperature stimulus	132	1	0.56	1270	0.42874	0.42874	Plac8
GO:0022607	cellular component assembly	2355	15	9.92	452	0.42932	0.06119	Actg1 / Anxa6 / Ccl5 / Dbnl / Gmfg / Hba-a1 / Hbb-bt / Mx1 / Pycard / Rac2 / Rpl13a / S100a10 / Samhd1 / Slc9a3r1 / Tapbp
GO:0044092	negative regulation of molecular function	792	4	3.34	1271	0.43005	0.43005	Gzma / Id2 / Pycard / Slc9a3r1
GO:0071241	cellular response to inorganic substance	133	1	0.56	1272	0.43117	0.43117	Id2
GO:0051053	negative regulation of DNA metabolic process	133	1	0.56	1273	0.43117	0.43117	Gzma
GO:0019935	cyclic-nucleotide-mediated signaling	133	1	0.56	1274	0.43117	0.43117	Slc9a3r1
GO:0009314	response to radiation	347	2	1.46	1275	0.43163	0.43163	Crip1 / Id2
GO:0007187	G protein-coupled receptor signaling pathway, coupled to cyclic nucleotide second messenger	134	1	0.56	1276	0.43359	0.43359	Slc9a3r1
GO:1903532	positive regulation of secretion by cell	349	2	1.47	1277	0.43453	0.43453	H2-T23 / Pycard
GO:0002285	lymphocyte activation involved in immune response	155	3	0.65	276	0.43504	0.02757	Batf / Lgals1 / Spn
GO:0045580	regulation of T cell differentiation	135	1	0.57	1279	0.436	0.436	Runx3
GO:0055074	calcium ion homeostasis	351	2	1.48	1280	0.43742	0.43742	Anxa6 / Ccl5
GO:0002218	activation of innate immune response	136	1	0.57	1281	0.4384	0.4384	Pycard
GO:0034404	nucleobase-containing small molecule biosynthetic process	137	1	0.58	1282	0.44078	0.44078	Samhd1
GO:0070838	divalent metal ion transport	354	2	1.49	1283	0.44174	0.44174	Anxa6 / Ccl5
GO:0010035	response to inorganic substance	354	2	1.49	1284	0.44174	0.44174	Crip1 / Id2
GO:0030030	cell projection organization	1262	6	5.32	1285	0.44212	0.44212	Ccl5 / Dbnl / Lgals1 / Rac2 / Runx3 / Slc9a3r1
GO:0006643	membrane lipid metabolic process	138	1	0.58	1287	0.44316	0.44316	Cers4
GO:0072511	divalent inorganic cation transport	356	2	1.5	1288	0.44461	0.44461	Anxa6 / Ccl5
GO:0045807	positive regulation of endocytosis	139	1	0.59	1289	0.44553	0.44553	Pycard
GO:0045333	cellular respiration	139	1	0.59	1290	0.44553	0.44553	Mdh1
GO:0050864	regulation of B cell activation	139	1	0.59	1291	0.44553	0.44553	Id2
GO:0002684	positive regulation of immune system process	794	10	3.35	97	0.44686	0.00165	Ccl5 / H2-Q7 / H2-T23 / Id2 / Lgals1 / Pycard / Rac2 / Runx3 / Spn / Zbp1
GO:0071478	cellular response to radiation	140	1	0.59	1292	0.44789	0.44789	Crip1
GO:0050865	regulation of cell activation	497	8	2.09	82	0.4499	0.00108	Ccl5 / H2-T23 / Id2 / Lgals1 / Pycard / Rac2 / Runx3 / Spn
GO:0051093	negative regulation of developmental process	813	4	3.43	1293	0.45008	0.45008	Id2 / Lgals1 / Plac8 / Runx3
GO:0055082	cellular chemical homeostasis	586	3	2.47	1294	0.45098	0.45098	Anxa6 / Ccl5 / Slc9a3r1
GO:0072503	cellular divalent inorganic cation homeostasis	361	2	1.52	1295	0.45175	0.45175	Anxa6 / Ccl5
GO:0032874	positive regulation of stress-activated MAPK cascade	142	1	0.6	1296	0.45258	0.45258	Pycard
GO:0055002	striated muscle cell development	142	1	0.6	1297	0.45258	0.45258	Actg1
GO:0010977	negative regulation of neuron projection development	142	1	0.6	1298	0.45258	0.45258	Lgals1
GO:0048869	cellular developmental process	3273	19	13.79	518	0.45334	0.07779	Actg1 / Anxa6 / Batf / Ccl5 / Cd8a / Dbnl / Hba-a1 / Hba-a2 / Id2 / Itgb7 / Lgals1 / Plac8 / Pou2f2 / Rac2 / Runx3 / S100a10 / S100a13 / Slc9a3r1 / Spn
GO:0070304	positive regulation of stress-activated protein kinase signaling cascade	143	1	0.6	1299	0.45491	0.45491	Pycard
GO:0032269	negative regulation of cellular protein metabolic process	820	4	3.46	1300	0.45671	0.45671	Gbp4 / Pycard / Rpl13a / Slc9a3r1
GO:0006259	DNA metabolic process	820	4	3.46	1301	0.45671	0.45671	Batf / Gzma / Rnf138 / Samhd1
GO:0051050	positive regulation of transport	820	4	3.46	1302	0.45671	0.45671	Ccl5 / H2-T23 / Pycard / Slc9a3r1
GO:0051017	actin filament bundle assembly	144	1	0.61	1303	0.45723	0.45723	S100a10
GO:0006733	oxidoreduction coenzyme metabolic process	144	1	0.61	1304	0.45723	0.45723	Mdh1
GO:0061351	neural precursor cell proliferation	144	1	0.61	1305	0.45723	0.45723	Id2
GO:0051222	positive regulation of protein transport	365	2	1.54	1306	0.45743	0.45743	H2-T23 / Pycard
GO:0071229	cellular response to acid chemical	145	1	0.61	1307	0.45954	0.45954	S100a10
GO:0006508	proteolysis	1287	6	5.42	1308	0.4613	0.4613	Aph1a / Gzma / Gzmb / Gzmk / Ifi27l2a / Pycard
GO:0008654	phospholipid biosynthetic process	146	1	0.62	1309	0.46184	0.46184	Pla2g16
GO:0007219	Notch signaling pathway	146	1	0.62	1310	0.46184	0.46184	Aph1a
GO:0043408	regulation of MAPK cascade	596	3	2.51	1311	0.46209	0.46209	Ccl5 / Pycard / Slc9a3r1
GO:0061572	actin filament bundle organization	147	1	0.62	1312	0.46413	0.46413	S100a10
GO:0051047	positive regulation of secretion	370	2	1.56	1313	0.46448	0.46448	H2-T23 / Pycard
GO:0006820	anion transport	372	2	1.57	1314	0.46728	0.46728	Slc9a3r1 / Slco3a1
GO:0043603	cellular amide metabolic process	832	4	3.51	1315	0.46802	0.46802	Aph1a / Cers4 / Rpl13a / Tapbp
GO:0043902	positive regulation of multi-organism process	149	1	0.63	1316	0.46868	0.46868	Lgals1
GO:0006606	protein import into nucleus	149	1	0.63	1317	0.46868	0.46868	Gbp4
GO:0001649	osteoblast differentiation	150	1	0.63	1319	0.47094	0.47094	Id2
GO:0030001	metal ion transport	605	3	2.55	1320	0.472	0.472	Anxa6 / Ccl5 / Slc9a3r1
GO:0050801	ion homeostasis	606	3	2.55	1321	0.4731	0.4731	Anxa6 / Ccl5 / Slc9a3r1
GO:0006814	sodium ion transport	151	1	0.64	1322	0.4732	0.4732	Slc9a3r1
GO:0051668	localization within membrane	151	1	0.64	1323	0.4732	0.4732	Itgb7
GO:0045596	negative regulation of cell differentiation	607	3	2.56	1324	0.47419	0.47419	Id2 / Lgals1 / Runx3
GO:0045766	positive regulation of angiogenesis	152	1	0.64	1326	0.47544	0.47544	Ccl5
GO:0043409	negative regulation of MAPK cascade	152	1	0.64	1327	0.47544	0.47544	Slc9a3r1
GO:0000082	G1/S transition of mitotic cell cycle	152	1	0.64	1328	0.47544	0.47544	Id2
GO:0032386	regulation of intracellular transport	378	2	1.59	1329	0.47565	0.47565	Gbp4 / Rac2
GO:0072507	divalent inorganic cation homeostasis	379	2	1.6	1330	0.47704	0.47704	Anxa6 / Ccl5
GO:0045664	regulation of neuron differentiation	610	3	2.57	1331	0.47747	0.47747	Ccl5 / Id2 / Lgals1
GO:0098657	import into cell	610	3	2.57	1332	0.47747	0.47747	Actg1 / Dbnl / Pycard
GO:0007623	circadian rhythm	153	1	0.64	1333	0.47767	0.47767	Id2
GO:0051170	import into nucleus	153	1	0.64	1334	0.47767	0.47767	Gbp4
GO:0003205	cardiac chamber development	153	1	0.64	1335	0.47767	0.47767	Id2
GO:0051726	regulation of cell cycle	844	4	3.56	1336	0.47926	0.47926	Id2 / Pla2g16 / Runx3 / Slc9a3r1
GO:0043933	protein-containing complex subunit organization	1672	12	7.05	374	0.47984	0.04412	Anxa6 / Ccl5 / Dbnl / Gmfg / Hba-a1 / Hbb-bt / Mx1 / Pycard / Rpl13a / S100a10 / Samhd1 / Tapbp
GO:0048771	tissue remodeling	154	1	0.65	1337	0.4799	0.4799	Rac2
GO:0055001	muscle cell development	154	1	0.65	1338	0.4799	0.4799	Actg1
GO:1904951	positive regulation of establishment of protein localization	382	2	1.61	1339	0.48119	0.48119	H2-T23 / Pycard
GO:0007411	axon guidance	155	1	0.65	1340	0.48211	0.48211	Runx3
GO:0097485	neuron projection guidance	155	1	0.65	1341	0.48211	0.48211	Runx3
GO:0048568	embryonic organ development	383	2	1.61	1342	0.48256	0.48256	Id2 / Slc9a3r1
GO:0050863	regulation of T cell activation	272	7	1.15	47	0.48283	0.00014	Ccl5 / H2-T23 / Lgals1 / Pycard / Rac2 / Runx3 / Spn
GO:0048513	animal organ development	2558	16	10.78	451	0.48454	0.06115	Anxa6 / Aph1a / Batf / Ccl5 / Cd8a / H2-T23 / Hba-a1 / Hba-a2 / Id2 / Lgals1 / Pla2g16 / Pou2f2 / Rpl13a / Runx3 / Slc9a3r1 / Spn
GO:0090276	regulation of peptide hormone secretion	157	1	0.66	1343	0.48652	0.48652	Ccl5
GO:0097529	myeloid leukocyte migration	171	3	0.72	320	0.48818	0.03539	Ccl5 / Rac2 / Rpl13a
GO:0046328	regulation of JNK cascade	158	1	0.67	1344	0.4887	0.4887	Pycard
GO:0060284	regulation of cell development	855	4	3.6	1346	0.48948	0.48948	Ccl5 / Id2 / Lgals1 / S100a10
GO:0031328	positive regulation of cellular biosynthetic process	1559	7	6.57	1347	0.48953	0.48953	Batf / Ccl5 / Id2 / Plac8 / Pou2f2 / Runx3 / Spn
GO:0006811	ion transport	1090	5	4.59	1349	0.48998	0.48998	Anxa6 / Ccl5 / Slc9a3r1 / Slco3a1 / Tmc6
GO:0050679	positive regulation of epithelial cell proliferation	159	1	0.67	1350	0.49088	0.49088	Ccl5
GO:0035265	organ growth	159	1	0.67	1351	0.49088	0.49088	Anxa6
GO:0010770	positive regulation of cell morphogenesis involved in differentiation	159	1	0.67	1352	0.49088	0.49088	S100a10
GO:0030073	insulin secretion	159	1	0.67	1353	0.49088	0.49088	Ccl5
GO:0051656	establishment of organelle localization	391	2	1.65	1354	0.49351	0.49351	Rac2 / Slc9a3r1
GO:0001501	skeletal system development	393	2	1.66	1355	0.49623	0.49623	Anxa6 / Runx3
GO:0045165	cell fate commitment	183	3	0.77	367	0.49677	0.04192	Batf / Id2 / Spn
GO:0046651	lymphocyte proliferation	259	5	1.09	150	0.49679	0.00464	Ccl5 / H2-T23 / Pycard / Rac2 / Spn
GO:0120032	regulation of plasma membrane bounded cell projection assembly	162	1	0.68	1356	0.49736	0.49736	Rac2
GO:0030324	lung development	162	1	0.68	1357	0.49736	0.49736	Rpl13a
GO:0050731	positive regulation of peptidyl-tyrosine phosphorylation	163	1	0.69	1358	0.4995	0.4995	Ccl5
GO:0032880	regulation of protein localization	866	4	3.65	1359	0.49963	0.49963	Ccl5 / Gbp4 / H2-T23 / Pycard
GO:0032943	mononuclear cell proliferation	261	5	1.1	152	0.50082	0.00479	Ccl5 / H2-T23 / Pycard / Rac2 / Spn
GO:0046434	organophosphate catabolic process	164	1	0.69	1360	0.50164	0.50164	Samhd1
GO:0030323	respiratory tube development	164	1	0.69	1361	0.50164	0.50164	Rpl13a
GO:0060491	regulation of cell projection assembly	164	1	0.69	1362	0.50164	0.50164	Rac2
GO:0044843	cell cycle G1/S phase transition	165	1	0.7	1363	0.50376	0.50376	Id2
GO:0030154	cell differentiation	3115	18	13.13	571	0.50406	0.08922	Actg1 / Anxa6 / Batf / Ccl5 / Cd8a / Dbnl / Hba-a1 / Hba-a2 / Id2 / Itgb7 / Lgals1 / Plac8 / Pou2f2 / Rac2 / Runx3 / S100a10 / Slc9a3r1 / Spn
GO:0034764	positive regulation of transmembrane transport	166	1	0.7	1364	0.50587	0.50587	Slc9a3r1
GO:1905114	cell surface receptor signaling pathway involved in cell-cell signaling	401	2	1.69	1365	0.507	0.507	Rnf138 / Slc9a3r1
GO:0051248	negative regulation of protein metabolic process	875	4	3.69	1366	0.50787	0.50787	Gbp4 / Pycard / Rpl13a / Slc9a3r1
GO:1904018	positive regulation of vasculature development	167	1	0.7	1367	0.50798	0.50798	Ccl5
GO:0007254	JNK cascade	167	1	0.7	1368	0.50798	0.50798	Pycard
GO:0007626	locomotory behavior	168	1	0.71	1369	0.51008	0.51008	Id2
GO:0050707	regulation of cytokine secretion	168	1	0.71	1370	0.51008	0.51008	Pycard
GO:0051224	negative regulation of protein transport	168	1	0.71	1371	0.51008	0.51008	Gbp4
GO:0000165	MAPK cascade	643	3	2.71	1372	0.51295	0.51295	Ccl5 / Pycard / Slc9a3r1
GO:0009891	positive regulation of biosynthetic process	1594	7	6.72	1373	0.51392	0.51392	Batf / Ccl5 / Id2 / Plac8 / Pou2f2 / Runx3 / Spn
GO:0010001	glial cell differentiation	170	1	0.72	1374	0.51425	0.51425	Id2
GO:0060348	bone development	170	1	0.72	1375	0.51425	0.51425	Anxa6
GO:0031345	negative regulation of cell projection organization	170	1	0.72	1376	0.51425	0.51425	Lgals1
GO:0022603	regulation of anatomical structure morphogenesis	883	4	3.72	1377	0.51515	0.51515	Ccl5 / S100a10 / S100a13 / Slc9a3r1
GO:0035264	multicellular organism growth	171	1	0.72	1378	0.51632	0.51632	Plac8
GO:0051129	negative regulation of cellular component organization	647	3	2.73	1379	0.51717	0.51717	Gmfg / Lgals1 / Rpl13a
GO:1904950	negative regulation of establishment of protein localization	172	1	0.72	1380	0.51838	0.51838	Gbp4
GO:0007275	multicellular organism development	3928	21	16.55	714	0.51866	0.12827	Anxa6 / Aph1a / Batf / Ccl5 / Cd8a / Dbnl / H2-Q7 / H2-T23 / Hba-a1 / Hba-a2 / Id2 / Lgals1 / Phc2 / Pla2g16 / Pou2f2 / Rac2 / Rpl13a / Runx3 / Samhd1 / Slc9a3r1 / Spn
GO:0030595	leukocyte chemotaxis	186	3	0.78	371	0.51896	0.04365	Ccl5 / Rac2 / Rpl13a
GO:0002699	positive regulation of immune effector process	209	3	0.88	446	0.51953	0.05801	H2-Q7 / H2-T23 / Rac2
GO:0044057	regulation of system process	411	2	1.73	1381	0.52025	0.52025	Anxa6 / Slc9a3r1
GO:0034329	cell junction assembly	173	1	0.73	1382	0.52043	0.52043	S100a10
GO:0019722	calcium-mediated signaling	173	1	0.73	1383	0.52043	0.52043	Cd8a
GO:0070661	leukocyte proliferation	272	5	1.15	166	0.52241	0.0057	Ccl5 / H2-T23 / Pycard / Rac2 / Spn
GO:0045597	positive regulation of cell differentiation	892	4	3.76	1385	0.52329	0.52329	Ccl5 / Id2 / Runx3 / S100a10
GO:0034622	cellular protein-containing complex assembly	892	4	3.76	1386	0.52329	0.52329	Gmfg / Mx1 / Pycard / Rpl13a
GO:0099504	synaptic vesicle cycle	175	1	0.74	1387	0.52452	0.52452	Actg1
GO:0006469	negative regulation of protein kinase activity	175	1	0.74	1388	0.52452	0.52452	Pycard
GO:0032412	regulation of ion transmembrane transporter activity	175	1	0.74	1389	0.52452	0.52452	Slc9a3r1
GO:0051051	negative regulation of transport	415	2	1.75	1390	0.52549	0.52549	Gbp4 / Slc9a3r1
GO:0001894	tissue homeostasis	176	1	0.74	1391	0.52654	0.52654	Rac2
GO:0048762	mesenchymal cell differentiation	176	1	0.74	1392	0.52654	0.52654	Anxa6
GO:0008361	regulation of cell size	176	1	0.74	1393	0.52654	0.52654	Slc9a3r1
GO:0001701	in utero embryonic development	416	2	1.75	1394	0.52679	0.52679	Hba-a1 / Hba-a2
GO:0006935	chemotaxis	440	4	1.85	658	0.52958	0.11415	Ccl5 / Rac2 / Rpl13a / Runx3
GO:0007266	Rho protein signal transduction	178	1	0.75	1395	0.53057	0.53057	Rac2
GO:0023014	signal transduction by protein phosphorylation	661	3	2.79	1396	0.53178	0.53178	Ccl5 / Pycard / Slc9a3r1
GO:0006909	phagocytosis	179	1	0.75	1397	0.53258	0.53258	Pycard
GO:0031396	regulation of protein ubiquitination	179	1	0.75	1398	0.53258	0.53258	Gbp4
GO:0043410	positive regulation of MAPK cascade	421	2	1.77	1399	0.53328	0.53328	Ccl5 / Pycard
GO:0006518	peptide metabolic process	663	3	2.79	1400	0.53385	0.53385	Aph1a / Rpl13a / Tapbp
GO:0006875	cellular metal ion homeostasis	422	2	1.78	1401	0.53457	0.53457	Anxa6 / Ccl5
GO:0030278	regulation of ossification	180	1	0.76	1402	0.53457	0.53457	Id2
GO:0021537	telencephalon development	180	1	0.76	1403	0.53457	0.53457	Id2
GO:0090257	regulation of muscle system process	180	1	0.76	1404	0.53457	0.53457	Anxa6
GO:0007423	sensory organ development	423	2	1.78	1405	0.53585	0.53585	H2-T23 / Slc9a3r1
GO:0007005	mitochondrion organization	424	2	1.79	1406	0.53714	0.53714	Mx1 / Pycard
GO:0017157	regulation of exocytosis	182	1	0.77	1407	0.53853	0.53853	Rac2
GO:0071559	response to transforming growth factor beta	182	1	0.77	1408	0.53853	0.53853	Runx3
GO:0022898	regulation of transmembrane transporter activity	182	1	0.77	1409	0.53853	0.53853	Slc9a3r1
GO:0030855	epithelial cell differentiation	426	2	1.79	1410	0.5397	0.5397	Id2 / Slc9a3r1
GO:0006281	DNA repair	427	2	1.8	1411	0.54098	0.54098	Rnf138 / Samhd1
GO:0090150	establishment of protein localization to membrane	184	1	0.78	1412	0.54246	0.54246	Zdhhc18
GO:0006898	receptor-mediated endocytosis	185	1	0.78	1413	0.54442	0.54442	Dbnl
GO:0060828	regulation of canonical Wnt signaling pathway	185	1	0.78	1414	0.54442	0.54442	Slc9a3r1
GO:0060541	respiratory system development	185	1	0.78	1415	0.54442	0.54442	Rpl13a
GO:1902531	regulation of intracellular signal transduction	1399	6	5.89	1416	0.54503	0.54503	Ccl5 / Cd8a / Pycard / S100a13 / S100a4 / Slc9a3r1
GO:0055085	transmembrane transport	917	4	3.86	1417	0.54556	0.54556	Anxa6 / Slc9a3r1 / Slco3a1 / Tap1
GO:0007163	establishment or maintenance of cell polarity	186	1	0.78	1418	0.54636	0.54636	Slc9a3r1
GO:0030155	regulation of cell adhesion	580	8	2.44	130	0.54694	0.00287	Ccl5 / H2-T23 / Lgals1 / Pycard / Rac2 / Runx3 / S100a10 / Spn
GO:0008610	lipid biosynthetic process	432	2	1.82	1419	0.54733	0.54733	Cers4 / Pla2g16
GO:0001932	regulation of protein phosphorylation	1163	5	4.9	1420	0.54895	0.54895	Ccl5 / Gbp4 / Pycard / Slc9a3r1 / Spn
GO:0051099	positive regulation of binding	188	1	0.79	1421	0.55023	0.55023	S100a10
GO:0043588	skin development	189	1	0.8	1422	0.55215	0.55215	Runx3
GO:0050793	regulation of developmental process	2132	9	8.98	1423	0.55286	0.55286	Ccl5 / Id2 / Lgals1 / Pla2g16 / Plac8 / Runx3 / S100a10 / S100a13 / Slc9a3r1
GO:0002064	epithelial cell development	190	1	0.8	1424	0.55406	0.55406	Slc9a3r1
GO:0044085	cellular component biogenesis	2562	15	10.8	648	0.55502	0.10924	Actg1 / Anxa6 / Ccl5 / Dbnl / Gmfg / Hba-a1 / Hbb-bt / Mx1 / Pycard / Rac2 / Rpl13a / S100a10 / Samhd1 / Slc9a3r1 / Tapbp
GO:0033673	negative regulation of kinase activity	191	1	0.8	1425	0.55596	0.55596	Pycard
GO:0032409	regulation of transporter activity	191	1	0.8	1426	0.55596	0.55596	Slc9a3r1
GO:0002009	morphogenesis of an epithelium	439	2	1.85	1427	0.55612	0.55612	Runx3 / Slc9a3r1
GO:0045055	regulated exocytosis	192	1	0.81	1429	0.55786	0.55786	Rac2
GO:0030072	peptide hormone secretion	192	1	0.81	1430	0.55786	0.55786	Ccl5
GO:0009605	response to external stimulus	1643	24	6.92	13	0.55946	1.6e-08	Batf / Ccl5 / Cd8a / Gbp2 / Gbp4 / Gbp6 / Gzma / H2-T23 / Hba-a1 / Hba-a2 / Id2 / Ifi27l2a / Il10rb / Mx1 / Oas3 / Pla2g16 / Plac8 / Pycard / Rac2 / Rpl13a / Runx3 / Samhd1 / Spn / Zbp1
GO:0048705	skeletal system morphogenesis	193	1	0.81	1431	0.55975	0.55975	Anxa6
GO:0006950	response to stress	2807	26	11.83	30	0.56137	2.7e-05	Actg1 / Batf / Ccl5 / Cd8a / Crip1 / Gbp2 / Gbp4 / Gbp6 / Gzmb / H2-Q7 / H2-T23 / Id2 / Igtp / Il10rb / Mx1 / Oas3 / Plac8 / Pycard / Rnf138 / Rpl13a / Samhd1 / Spn / Tap1 / Tapbp / Trafd1 / Zbp1
GO:0099003	vesicle-mediated transport in synapse	194	1	0.82	1432	0.56163	0.56163	Actg1
GO:0007346	regulation of mitotic cell cycle	445	2	1.88	1433	0.56357	0.56357	Id2 / Slc9a3r1
GO:0015833	peptide transport	1558	10	6.56	673	0.56368	0.1154	Ccl5 / Gbp4 / H2-T23 / Pou2f2 / Pycard / S100a13 / Slc9a3r1 / Slco3a1 / Tap1 / Zdhhc18
GO:0032872	regulation of stress-activated MAPK cascade	196	1	0.83	1434	0.56536	0.56536	Pycard
GO:0050790	regulation of catalytic activity	1497	8	6.31	1085	0.56676	0.29338	Aph1a / Ccl5 / Gzma / Ifi27l2a / Oas3 / Pycard / S100a10 / Slc9a3r1
GO:1901215	negative regulation of neuron death	197	1	0.83	1435	0.56722	0.56722	Ccl5
GO:0019725	cellular homeostasis	696	3	2.93	1436	0.56726	0.56726	Anxa6 / Ccl5 / Slc9a3r1
GO:0070302	regulation of stress-activated protein kinase signaling cascade	198	1	0.83	1437	0.56907	0.56907	Pycard
GO:0048731	system development	3511	19	14.79	739	0.56966	0.13452	Anxa6 / Aph1a / Batf / Ccl5 / Cd8a / Dbnl / H2-T23 / Hba-a1 / Hba-a2 / Id2 / Lgals1 / Pla2g16 / Pou2f2 / Rac2 / Rpl13a / Runx3 / Samhd1 / Slc9a3r1 / Spn
GO:0042886	amide transport	1570	10	6.62	684	0.57171	0.1198	Ccl5 / Gbp4 / H2-T23 / Pou2f2 / Pycard / S100a13 / Slc9a3r1 / Slco3a1 / Tap1 / Zdhhc18
GO:0009117	nucleotide metabolic process	455	2	1.92	1439	0.57578	0.57578	Mdh1 / Samhd1
GO:0060627	regulation of vesicle-mediated transport	455	2	1.92	1440	0.57578	0.57578	Pycard / Rac2
GO:0009790	embryo development	952	4	4.01	1441	0.57586	0.57586	Hba-a1 / Hba-a2 / Id2 / Slc9a3r1
GO:0046677	response to antibiotic	202	1	0.85	1442	0.57639	0.57639	Crip1
GO:0048738	cardiac muscle tissue development	202	1	0.85	1443	0.57639	0.57639	Id2
GO:1902532	negative regulation of intracellular signal transduction	457	2	1.93	1444	0.57819	0.57819	Pycard / Slc9a3r1
GO:0017038	protein import	203	1	0.86	1445	0.5782	0.5782	Gbp4
GO:0033157	regulation of intracellular protein transport	203	1	0.86	1446	0.5782	0.5782	Gbp4
GO:0006915	apoptotic process	1598	12	6.73	307	0.57861	0.03268	Anxa6 / Ccl5 / Crip1 / Gzma / Gzmb / Ifi27l2a / Lgals1 / Plac8 / Pycard / Runx3 / Slc9a3r1 / Spn
GO:0046883	regulation of hormone secretion	204	1	0.86	1447	0.58	0.58	Ccl5
GO:0022618	ribonucleoprotein complex assembly	204	1	0.86	1448	0.58	0.58	Rpl13a
GO:0050769	positive regulation of neurogenesis	460	2	1.94	1449	0.58179	0.58179	Ccl5 / Id2
GO:0006936	muscle contraction	205	1	0.86	1450	0.58179	0.58179	Anxa6
GO:0015031	protein transport	1526	8	6.43	1103	0.58354	0.3119	Ccl5 / Gbp4 / H2-T23 / Pou2f2 / Pycard / S100a13 / Tap1 / Zdhhc18
GO:0006753	nucleoside phosphate metabolic process	462	2	1.95	1451	0.58418	0.58418	Mdh1 / Samhd1
GO:0008283	cell proliferation	1634	10	6.88	765	0.58511	0.14485	Ccl5 / H2-T23 / Id2 / Plac8 / Pycard / Rac2 / Runx3 / S100a13 / Slc9a3r1 / Spn
GO:0051924	regulation of calcium ion transport	207	1	0.87	1452	0.58536	0.58536	Ccl5
GO:0048511	rhythmic process	207	1	0.87	1453	0.58536	0.58536	Id2
GO:0050900	leukocyte migration	284	7	1.2	51	0.58604	0.00018	Ccl5 / Itgb7 / Pycard / Rac2 / Rpl13a / Selplg / Spn
GO:1903320	regulation of protein modification by small protein conjugation or removal	208	1	0.88	1454	0.58713	0.58713	Gbp4
GO:0001101	response to acid chemical	208	1	0.88	1455	0.58713	0.58713	S100a10
GO:0043543	protein acylation	208	1	0.88	1456	0.58713	0.58713	Zdhhc18
GO:0050778	positive regulation of immune response	511	4	2.15	826	0.58818	0.16816	H2-Q7 / H2-T23 / Pycard / Zbp1
GO:0040011	locomotion	1395	11	5.88	299	0.58832	0.02985	Anxa6 / Ccl5 / Id2 / Itgb7 / Pycard / Rac2 / Rpl13a / Runx3 / Selplg / Slc9a3r1 / Spn
GO:0051241	negative regulation of multicellular organismal process	1022	6	4.31	1022	0.58865	0.25972	Gbp4 / Id2 / Lgals1 / Plac8 / Pycard / Runx3
GO:0015980	energy derivation by oxidation of organic compounds	209	1	0.88	1457	0.5889	0.5889	Mdh1
GO:0045930	negative regulation of mitotic cell cycle	209	1	0.88	1458	0.5889	0.5889	Slc9a3r1
GO:0051091	positive regulation of DNA-binding transcription factor activity	210	1	0.88	1459	0.59066	0.59066	Pycard
GO:0030003	cellular cation homeostasis	471	2	1.98	1461	0.59481	0.59481	Anxa6 / Ccl5
GO:0090068	positive regulation of cell cycle process	213	1	0.9	1462	0.59588	0.59588	Id2
GO:0000122	negative regulation of transcription by RNA polymerase II	727	3	3.06	1463	0.59733	0.59733	Gbp4 / Id2 / Runx3
GO:0010506	regulation of autophagy	214	1	0.9	1464	0.59761	0.59761	Pycard
GO:0034330	cell junction organization	214	1	0.9	1465	0.59761	0.59761	S100a10
GO:0030336	negative regulation of cell migration	214	1	0.9	1466	0.59761	0.59761	Slc9a3r1
GO:0016042	lipid catabolic process	214	1	0.9	1467	0.59761	0.59761	Pla2g16
GO:0051403	stress-activated MAPK cascade	215	1	0.91	1468	0.59933	0.59933	Pycard
GO:0071826	ribonucleoprotein complex subunit organization	216	1	0.91	1469	0.60105	0.60105	Rpl13a
GO:0060485	mesenchyme development	216	1	0.91	1470	0.60105	0.60105	Anxa6
GO:0090596	sensory organ morphogenesis	216	1	0.91	1471	0.60105	0.60105	Slc9a3r1
GO:0051641	cellular localization	2215	9	9.33	1472	0.60187	0.60187	Actg1 / Gbp2 / Gbp4 / Itgb7 / Rac2 / S100a10 / Slc9a3r1 / Tap1 / Zdhhc18
GO:0007399	nervous system development	1726	7	7.27	1473	0.60208	0.60208	Ccl5 / Dbnl / Id2 / Lgals1 / Rac2 / Runx3 / Slc9a3r1
GO:0051049	regulation of transport	1480	6	6.24	1474	0.60217	0.60217	Ccl5 / Gbp4 / H2-T23 / Pycard / Rac2 / Slc9a3r1
GO:0071214	cellular response to abiotic stimulus	217	1	0.91	1475	0.60275	0.60275	Crip1
GO:0104004	cellular response to environmental stimulus	217	1	0.91	1476	0.60275	0.60275	Crip1
GO:0012501	programmed cell death	1630	12	6.87	345	0.60286	0.03732	Anxa6 / Ccl5 / Crip1 / Gzma / Gzmb / Ifi27l2a / Lgals1 / Plac8 / Pycard / Runx3 / Slc9a3r1 / Spn
GO:0044093	positive regulation of molecular function	1234	5	5.2	1477	0.60324	0.60324	Aph1a / Ccl5 / Ifi27l2a / Pycard / S100a10
GO:0045944	positive regulation of transcription by RNA polymerase II	986	4	4.15	1478	0.60424	0.60424	Batf / Plac8 / Pou2f2 / Runx3
GO:0010557	positive regulation of macromolecule biosynthetic process	1488	6	6.27	1479	0.60762	0.60762	Batf / Id2 / Plac8 / Pou2f2 / Runx3 / Spn
GO:0016050	vesicle organization	221	1	0.93	1480	0.60951	0.60951	S100a10
GO:0050730	regulation of peptidyl-tyrosine phosphorylation	221	1	0.93	1481	0.60951	0.60951	Ccl5
GO:0003007	heart morphogenesis	221	1	0.93	1482	0.60951	0.60951	Id2
GO:0034613	cellular protein localization	1491	6	6.28	1483	0.60966	0.60966	Gbp2 / Gbp4 / Itgb7 / S100a10 / Slc9a3r1 / Zdhhc18
GO:0051348	negative regulation of transferase activity	223	1	0.94	1484	0.61284	0.61284	Pycard
GO:0060070	canonical Wnt signaling pathway	224	1	0.94	1485	0.6145	0.6145	Slc9a3r1
GO:0070727	cellular macromolecule localization	1499	6	6.32	1486	0.61505	0.61505	Gbp2 / Gbp4 / Itgb7 / S100a10 / Slc9a3r1 / Zdhhc18
GO:0055065	metal ion homeostasis	489	2	2.06	1487	0.61547	0.61547	Anxa6 / Ccl5
GO:2000146	negative regulation of cell motility	225	1	0.95	1489	0.61615	0.61615	Slc9a3r1
GO:0009144	purine nucleoside triphosphate metabolic process	225	1	0.95	1490	0.61615	0.61615	Samhd1
GO:0050767	regulation of neurogenesis	751	3	3.16	1491	0.61969	0.61969	Ccl5 / Id2 / Lgals1
GO:0045785	positive regulation of cell adhesion	355	7	1.5	76	0.61977	0.0007	Ccl5 / H2-T23 / Lgals1 / Pycard / Runx3 / S100a10 / Spn
GO:0006605	protein targeting	228	1	0.96	1492	0.62106	0.62106	Zdhhc18
GO:0060326	cell chemotaxis	244	3	1.03	540	0.62176	0.08358	Ccl5 / Rac2 / Rpl13a
GO:0045893	positive regulation of transcription, DNA-templated	1260	5	5.31	1493	0.62222	0.62222	Batf / Id2 / Plac8 / Pou2f2 / Runx3
GO:0006260	DNA replication	229	1	0.96	1494	0.62268	0.62268	Samhd1
GO:0051962	positive regulation of nervous system development	496	2	2.09	1495	0.62329	0.62329	Ccl5 / Id2
GO:0045926	negative regulation of growth	230	1	0.97	1496	0.62429	0.62429	Plac8
GO:1903508	positive regulation of nucleic acid-templated transcription	1263	5	5.32	1497	0.62438	0.62438	Batf / Id2 / Plac8 / Pou2f2 / Runx3
GO:0042325	regulation of phosphorylation	1263	5	5.32	1498	0.62438	0.62438	Ccl5 / Gbp4 / Pycard / Slc9a3r1 / Spn
GO:0006468	protein phosphorylation	1514	6	6.38	1499	0.62506	0.62506	Ccl5 / Gbp4 / Pycard / Runx3 / Slc9a3r1 / Spn
GO:1902680	positive regulation of RNA biosynthetic process	1264	5	5.33	1500	0.6251	0.6251	Batf / Id2 / Plac8 / Pou2f2 / Runx3
GO:0009968	negative regulation of signal transduction	1012	4	4.26	1501	0.62519	0.62519	Ccl5 / Pycard / Samhd1 / Slc9a3r1
GO:0048598	embryonic morphogenesis	500	2	2.11	1502	0.6277	0.6277	Id2 / Slc9a3r1
GO:0050896	response to stimulus	6001	43	25.29	25	0.6278	4.1e-06	Actg1 / Anxa6 / Aph1a / Batf / Ccl5 / Cd8a / Crip1 / Dbnl / Gbp2 / Gbp4 / Gbp6 / Gzma / Gzmb / H2-Q7 / H2-T23 / Hba-a1 / Hba-a2 / Id2 / Ifi27l2a / Igtp / Il10rb / Itgb7 / Lgals1 / Mx1 / Oas3 / Pla2g16 / Plac8 / Pou2f2 / Pycard / Rac2 / Rnf138 / Rpl13a / Runx3 / S100a10 / S100a13 / S100a4 / Samhd1 / Slc9a3r1 / Spn / Tap1 / Tapbp / Trafd1 / Zbp1
GO:0051640	organelle localization	502	2	2.12	1503	0.62989	0.62989	Rac2 / Slc9a3r1
GO:1901990	regulation of mitotic cell cycle phase transition	234	1	0.99	1504	0.63069	0.63069	Id2
GO:0014070	response to organic cyclic compound	503	2	2.12	1505	0.63099	0.63099	Ccl5 / Hba-a1
GO:0043269	regulation of ion transport	505	2	2.13	1506	0.63316	0.63316	Ccl5 / Slc9a3r1
GO:0051146	striated muscle cell differentiation	237	1	1	1507	0.63541	0.63541	Actg1
GO:0033554	cellular response to stress	1533	6	6.46	1508	0.63754	0.63754	Batf / Crip1 / Id2 / Pycard / Rnf138 / Samhd1
GO:0035556	intracellular signal transduction	2129	10	8.97	1239	0.63811	0.40808	Batf / Ccl5 / Cd8a / Crip1 / Dbnl / Pycard / Rac2 / S100a13 / S100a4 / Slc9a3r1
GO:0030111	regulation of Wnt signaling pathway	239	1	1.01	1509	0.63853	0.63853	Slc9a3r1
GO:0031647	regulation of protein stability	241	1	1.02	1510	0.64162	0.64162	Pycard
GO:0009141	nucleoside triphosphate metabolic process	241	1	1.02	1511	0.64162	0.64162	Samhd1
GO:0045184	establishment of protein localization	1616	8	6.81	1185	0.64236	0.37086	Ccl5 / Gbp4 / H2-T23 / Pou2f2 / Pycard / S100a13 / Tap1 / Zdhhc18
GO:0030100	regulation of endocytosis	242	1	1.02	1512	0.64316	0.64316	Pycard
GO:0002682	regulation of immune system process	1120	14	4.72	50	0.64323	0.00018	Ccl5 / Gbp4 / H2-Q7 / H2-T23 / Id2 / Lgals1 / Pycard / Rac2 / Runx3 / Samhd1 / Spn / Tap1 / Trafd1 / Zbp1
GO:0016567	protein ubiquitination	515	2	2.17	1513	0.64391	0.64391	Gbp4 / Rnf138
GO:0055086	nucleobase-containing small molecule metabolic process	515	2	2.17	1514	0.64391	0.64391	Mdh1 / Samhd1
GO:0042063	gliogenesis	243	1	1.02	1515	0.64469	0.64469	Id2
GO:0009628	response to abiotic stimulus	779	3	3.28	1516	0.64474	0.64474	Crip1 / Id2 / Plac8
GO:1904062	regulation of cation transmembrane transport	244	1	1.03	1517	0.64621	0.64621	Slc9a3r1
GO:0019637	organophosphate metabolic process	781	3	3.29	1518	0.64648	0.64648	Mdh1 / Pla2g16 / Samhd1
GO:0006812	cation transport	782	3	3.3	1519	0.64735	0.64735	Anxa6 / Ccl5 / Slc9a3r1
GO:0048872	homeostasis of number of cells	282	3	1.19	674	0.64811	0.11586	Hba-a1 / Hba-a2 / Id2
GO:0031098	stress-activated protein kinase signaling cascade	246	1	1.04	1520	0.64924	0.64924	Pycard
GO:0006869	lipid transport	247	1	1.04	1521	0.65074	0.65074	Slco3a1
GO:0045765	regulation of angiogenesis	248	1	1.04	1522	0.65224	0.65224	Ccl5
GO:0043086	negative regulation of catalytic activity	523	2	2.2	1523	0.65232	0.65232	Gzma / Pycard
GO:0046879	hormone secretion	252	1	1.06	1524	0.65816	0.65816	Ccl5
GO:0009636	response to toxic substance	252	1	1.06	1525	0.65816	0.65816	Ccl5
GO:0051271	negative regulation of cellular component movement	252	1	1.06	1526	0.65816	0.65816	Slc9a3r1
GO:0048729	tissue morphogenesis	530	2	2.23	1527	0.65956	0.65956	Runx3 / Slc9a3r1
GO:0009914	hormone transport	257	1	1.08	1528	0.66543	0.66543	Ccl5
GO:0061024	membrane organization	536	2	2.26	1529	0.66567	0.66567	Mx1 / S100a10
GO:0048523	negative regulation of cellular process	3807	15	16.04	1530	0.66642	0.66642	Anxa6 / Ccl5 / Gbp4 / Gmfg / Gzma / Id2 / Lgals1 / Pla2g16 / Plac8 / Pycard / Rpl13a / Runx3 / Samhd1 / Slc9a3r1 / Spn
GO:0001934	positive regulation of protein phosphorylation	808	3	3.4	1531	0.66947	0.66947	Ccl5 / Pycard / Spn
GO:1901987	regulation of cell cycle phase transition	260	1	1.1	1532	0.66972	0.66972	Id2
GO:0061061	muscle structure development	541	2	2.28	1533	0.6707	0.6707	Actg1 / Lgals1
GO:0046907	intracellular transport	1336	5	5.63	1534	0.67468	0.67468	Gbp4 / Rac2 / Slc9a3r1 / Tap1 / Zdhhc18
GO:0055080	cation homeostasis	545	2	2.3	1535	0.67468	0.67468	Anxa6 / Ccl5
GO:0032101	regulation of response to external stimulus	605	5	2.55	650	0.67506	0.11076	Ccl5 / Gbp4 / Pycard / Rac2 / Spn
GO:0019216	regulation of lipid metabolic process	264	1	1.11	1536	0.67535	0.67535	Id2
GO:0051235	maintenance of location	265	1	1.12	1537	0.67674	0.67674	Anxa6
GO:0051130	positive regulation of cellular component organization	1081	4	4.55	1538	0.67742	0.67742	Gmfg / Pycard / Rac2 / S100a10
GO:0040013	negative regulation of locomotion	266	1	1.12	1539	0.67813	0.67813	Slc9a3r1
GO:0006732	coenzyme metabolic process	266	1	1.12	1540	0.67813	0.67813	Mdh1
GO:0006357	regulation of transcription by RNA polymerase II	1599	6	6.74	1541	0.67903	0.67903	Batf / Gbp4 / Id2 / Plac8 / Pou2f2 / Runx3
GO:0065008	regulation of biological quality	2971	13	12.52	1348	0.67909	0.48986	Anxa6 / Ccl5 / Gmfg / Hba-a1 / Hba-a2 / Id2 / Plac8 / Pycard / Rac2 / Rpl13a / S100a13 / Slc9a3r1 / Tapbp
GO:0031347	regulation of defense response	503	9	2.12	55	0.67987	0.00024	Ccl5 / Gbp4 / H2-T23 / Pycard / Samhd1 / Spn / Tap1 / Trafd1 / Zbp1
GO:0051254	positive regulation of RNA metabolic process	1345	5	5.67	1542	0.68057	0.68057	Batf / Id2 / Plac8 / Pou2f2 / Runx3
GO:0010628	positive regulation of gene expression	1605	6	6.76	1543	0.68266	0.68266	Batf / Ccl5 / Id2 / Plac8 / Pou2f2 / Runx3
GO:0051960	regulation of nervous system development	825	3	3.48	1544	0.68339	0.68339	Ccl5 / Id2 / Lgals1
GO:0001819	positive regulation of cytokine production	366	4	1.54	477	0.68463	0.06819	Ccl5 / H2-T23 / Pycard / Spn
GO:0030162	regulation of proteolysis	557	2	2.35	1545	0.68638	0.68638	Ifi27l2a / Pycard
GO:0032446	protein modification by small protein conjugation	557	2	2.35	1546	0.68638	0.68638	Gbp4 / Rnf138
GO:0018108	peptidyl-tyrosine phosphorylation	274	1	1.15	1547	0.68902	0.68902	Ccl5
GO:0051346	negative regulation of hydrolase activity	274	1	1.15	1548	0.68902	0.68902	Gzma
GO:1901342	regulation of vasculature development	275	1	1.16	1549	0.69036	0.69036	Ccl5
GO:0046486	glycerolipid metabolic process	275	1	1.16	1550	0.69036	0.69036	Pla2g16
GO:0008219	cell death	1758	12	7.41	450	0.69141	0.06069	Anxa6 / Ccl5 / Crip1 / Gzma / Gzmb / Ifi27l2a / Lgals1 / Plac8 / Pycard / Runx3 / Slc9a3r1 / Spn
GO:0018212	peptidyl-tyrosine modification	277	1	1.17	1551	0.69301	0.69301	Ccl5
GO:0010648	negative regulation of cell communication	1103	4	4.65	1552	0.69301	0.69301	Ccl5 / Pycard / Samhd1 / Slc9a3r1
GO:0051172	negative regulation of nitrogen compound metabolic process	1879	7	7.92	1553	0.69364	0.69364	Gbp4 / Gzma / Id2 / Pycard / Rpl13a / Runx3 / Slc9a3r1
GO:0030900	forebrain development	278	1	1.17	1554	0.69433	0.69433	Id2
GO:0023057	negative regulation of signaling	1107	4	4.66	1555	0.69579	0.69579	Ccl5 / Pycard / Samhd1 / Slc9a3r1
GO:0010876	lipid localization	280	1	1.18	1556	0.69695	0.69695	Slco3a1
GO:0051169	nuclear transport	283	1	1.19	1557	0.70084	0.70084	Gbp4
GO:0006913	nucleocytoplasmic transport	283	1	1.19	1558	0.70084	0.70084	Gbp4
GO:0042327	positive regulation of phosphorylation	849	3	3.58	1559	0.70232	0.70232	Ccl5 / Pycard / Spn
GO:0051649	establishment of localization in cell	1640	6	6.91	1560	0.7033	0.7033	Actg1 / Gbp4 / Rac2 / Slc9a3r1 / Tap1 / Zdhhc18
GO:0045859	regulation of protein kinase activity	575	2	2.42	1561	0.70331	0.70331	Pycard / Slc9a3r1
GO:0006810	transport	3400	16	14.33	1160	0.70409	0.35267	Actg1 / Anxa6 / Ccl5 / Dbnl / Gbp4 / H2-T23 / Pou2f2 / Pycard / Rac2 / S100a10 / S100a13 / Slc9a3r1 / Slco3a1 / Tap1 / Tmc6 / Zdhhc18
GO:0010769	regulation of cell morphogenesis involved in differentiation	286	1	1.21	1562	0.70468	0.70468	S100a10
GO:0071705	nitrogen compound transport	1789	10	7.54	944	0.70468	0.21597	Ccl5 / Gbp4 / H2-T23 / Pou2f2 / Pycard / S100a13 / Slc9a3r1 / Slco3a1 / Tap1 / Zdhhc18
GO:0006417	regulation of translation	287	1	1.21	1563	0.70595	0.70595	Rpl13a
GO:0003012	muscle system process	291	1	1.23	1564	0.71098	0.71098	Anxa6
GO:0001503	ossification	291	1	1.23	1565	0.71098	0.71098	Id2
GO:0006366	transcription by RNA polymerase II	1654	6	6.97	1566	0.71131	0.71131	Batf / Gbp4 / Id2 / Plac8 / Pou2f2 / Runx3
GO:0019220	regulation of phosphate metabolic process	1394	5	5.87	1567	0.71147	0.71147	Ccl5 / Gbp4 / Pycard / Slc9a3r1 / Spn
GO:0051174	regulation of phosphorus metabolic process	1395	5	5.88	1568	0.71208	0.71208	Ccl5 / Gbp4 / Pycard / Slc9a3r1 / Spn
GO:0051128	regulation of cellular component organization	2169	8	9.14	1569	0.7125	0.7125	Gmfg / Lgals1 / Pycard / Rac2 / Rpl13a / S100a10 / S100a13 / Slc9a3r1
GO:0060429	epithelium development	864	3	3.64	1570	0.71372	0.71372	Id2 / Runx3 / Slc9a3r1
GO:0048878	chemical homeostasis	865	3	3.64	1571	0.71447	0.71447	Anxa6 / Ccl5 / Slc9a3r1
GO:0006091	generation of precursor metabolites and energy	297	1	1.25	1572	0.71835	0.71835	Mdh1
GO:0006644	phospholipid metabolic process	299	1	1.26	1573	0.72077	0.72077	Pla2g16
GO:0048589	developmental growth	596	2	2.51	1574	0.72211	0.72211	Anxa6 / Plac8
GO:1901214	regulation of neuron death	303	1	1.28	1575	0.72555	0.72555	Ccl5
GO:0006796	phosphate-containing compound metabolic process	2451	9	10.33	1576	0.72617	0.72617	Ccl5 / Gbp4 / Mdh1 / Pla2g16 / Pycard / Runx3 / Samhd1 / Slc9a3r1 / Spn
GO:0065009	regulation of molecular function	2029	9	8.55	1345	0.7291	0.48945	Aph1a / Ccl5 / Gzma / Id2 / Ifi27l2a / Oas3 / Pycard / S100a10 / Slc9a3r1
GO:0035295	tube development	887	3	3.74	1577	0.73056	0.73056	Ccl5 / Id2 / Rpl13a
GO:0048638	regulation of developmental growth	309	1	1.3	1578	0.73256	0.73256	Plac8
GO:0042692	muscle cell differentiation	309	1	1.3	1579	0.73256	0.73256	Actg1
GO:0006793	phosphorus metabolic process	2471	9	10.41	1581	0.7355	0.7355	Ccl5 / Gbp4 / Mdh1 / Pla2g16 / Pycard / Runx3 / Samhd1 / Slc9a3r1 / Spn
GO:2000113	negative regulation of cellular macromolecule biosynthetic process	1168	4	4.92	1582	0.73603	0.73603	Gbp4 / Id2 / Rpl13a / Runx3
GO:0009888	tissue development	1437	5	6.05	1583	0.73689	0.73689	Anxa6 / Id2 / Pla2g16 / Runx3 / Slc9a3r1
GO:0045787	positive regulation of cell cycle	313	1	1.32	1584	0.73714	0.73714	Id2
GO:0015672	monovalent inorganic cation transport	313	1	1.32	1585	0.73714	0.73714	Slc9a3r1
GO:0034220	ion transmembrane transport	616	2	2.6	1586	0.73909	0.73909	Anxa6 / Slc9a3r1
GO:0060249	anatomical structure homeostasis	316	1	1.33	1587	0.74052	0.74052	Rac2
GO:0010556	regulation of macromolecule biosynthetic process	2737	10	11.53	1588	0.74098	0.74098	Batf / Ccl5 / Gbp4 / Id2 / Plac8 / Pou2f2 / Pycard / Rpl13a / Runx3 / Spn
GO:0010562	positive regulation of phosphorus metabolic process	904	3	3.81	1589	0.74252	0.74252	Ccl5 / Pycard / Spn
GO:0045937	positive regulation of phosphate metabolic process	904	3	3.81	1590	0.74252	0.74252	Ccl5 / Pycard / Spn
GO:0048522	positive regulation of cellular process	4229	20	17.82	1105	0.74428	0.31247	Batf / Ccl5 / Cd8a / Gmfg / Gzma / H2-T23 / Id2 / Ifi27l2a / Lgals1 / Plac8 / Pou2f2 / Pycard / Rac2 / Runx3 / S100a10 / S100a13 / S100a4 / Slc9a3r1 / Spn / Zbp1
GO:0045934	negative regulation of nucleobase-containing compound metabolic process	1183	4	4.98	1591	0.74531	0.74531	Gbp4 / Gzma / Id2 / Runx3
GO:0044772	mitotic cell cycle phase transition	321	1	1.35	1592	0.74606	0.74606	Id2
GO:0051252	regulation of RNA metabolic process	2498	9	10.53	1593	0.74777	0.74777	Batf / Ccl5 / Gbp4 / Id2 / Oas3 / Plac8 / Pou2f2 / Pycard / Runx3
GO:0051234	establishment of localization	3511	16	14.79	1238	0.74901	0.40688	Actg1 / Anxa6 / Ccl5 / Dbnl / Gbp4 / H2-T23 / Pou2f2 / Pycard / Rac2 / S100a10 / S100a13 / Slc9a3r1 / Slco3a1 / Tap1 / Tmc6 / Zdhhc18
GO:0043549	regulation of kinase activity	630	2	2.65	1594	0.75046	0.75046	Pycard / Slc9a3r1
GO:0043604	amide biosynthetic process	630	2	2.65	1595	0.75046	0.75046	Cers4 / Rpl13a
GO:0050808	synapse organization	326	1	1.37	1597	0.75148	0.75148	Dbnl
GO:0034248	regulation of cellular amide metabolic process	326	1	1.37	1598	0.75148	0.75148	Rpl13a
GO:0034765	regulation of ion transmembrane transport	326	1	1.37	1599	0.75148	0.75148	Slc9a3r1
GO:0051239	regulation of multicellular organismal process	2492	12	10.5	1165	0.75189	0.35491	Anxa6 / Ccl5 / Gbp4 / H2-T23 / Id2 / Lgals1 / Pla2g16 / Plac8 / Pycard / Runx3 / Slc9a3r1 / Spn
GO:0120035	regulation of plasma membrane bounded cell projection organization	632	2	2.66	1600	0.75205	0.75205	Lgals1 / Rac2
GO:0010558	negative regulation of macromolecule biosynthetic process	1197	4	5.04	1601	0.75375	0.75375	Gbp4 / Id2 / Rpl13a / Runx3
GO:0032501	multicellular organismal process	5090	25	21.45	917	0.75391	0.20483	Anxa6 / Aph1a / Batf / Ccl5 / Cd8a / Dbnl / Gbp4 / H2-Q7 / H2-T23 / Hba-a1 / Hba-a2 / Id2 / Lgals1 / Phc2 / Pla2g16 / Plac8 / Pou2f2 / Pycard / Rac2 / Rpl13a / Runx3 / S100a13 / Samhd1 / Slc9a3r1 / Spn
GO:0008015	blood circulation	330	1	1.39	1602	0.75574	0.75574	Id2
GO:0051094	positive regulation of developmental process	1205	4	5.08	1603	0.75848	0.75848	Ccl5 / Id2 / Runx3 / S100a10
GO:0031344	regulation of cell projection organization	641	2	2.7	1605	0.7591	0.7591	Lgals1 / Rac2
GO:0043009	chordate embryonic development	642	2	2.71	1606	0.75987	0.75987	Hba-a1 / Hba-a2
GO:0070997	neuron death	334	1	1.41	1607	0.75993	0.75993	Ccl5
GO:0002253	activation of immune response	334	1	1.41	1608	0.75993	0.75993	Pycard
GO:0031399	regulation of protein modification process	1482	5	6.24	1609	0.76177	0.76177	Ccl5 / Gbp4 / Pycard / Slc9a3r1 / Spn
GO:0071407	cellular response to organic cyclic compound	337	1	1.42	1610	0.76302	0.76302	Ccl5
GO:0003013	circulatory system process	338	1	1.42	1611	0.76404	0.76404	Id2
GO:0007409	axonogenesis	340	1	1.43	1612	0.76608	0.76608	Runx3
GO:0014706	striated muscle tissue development	341	1	1.44	1614	0.76708	0.76708	Id2
GO:0006629	lipid metabolic process	941	3	3.96	1615	0.76712	0.76712	Cers4 / Id2 / Pla2g16
GO:0070887	cellular response to chemical stimulus	2102	17	8.86	157	0.76768	0.00498	Actg1 / Ccl5 / Crip1 / Gbp2 / Gbp4 / Gbp6 / H2-Q7 / Id2 / Igtp / Il10rb / Pycard / Rac2 / Rnf138 / Rpl13a / S100a10 / Samhd1 / Zbp1
GO:0072594	establishment of protein localization to organelle	342	1	1.44	1616	0.76809	0.76809	Gbp4
GO:0051173	positive regulation of nitrogen compound metabolic process	2545	9	10.72	1617	0.76824	0.76824	Batf / Ccl5 / Id2 / Ifi27l2a / Plac8 / Pou2f2 / Pycard / Runx3 / Spn
GO:0031324	negative regulation of cellular metabolic process	2028	7	8.55	1618	0.7693	0.7693	Gbp4 / Gzma / Id2 / Pycard / Rpl13a / Runx3 / Slc9a3r1
GO:0061919	process utilizing autophagic mechanism	344	1	1.45	1619	0.77009	0.77009	Pycard
GO:0006914	autophagy	344	1	1.45	1620	0.77009	0.77009	Pycard
GO:0009792	embryo development ending in birth or egg hatching	656	2	2.76	1621	0.77047	0.77047	Hba-a1 / Hba-a2
GO:2001141	regulation of RNA biosynthetic process	2297	8	9.68	1622	0.7728	0.7728	Batf / Ccl5 / Gbp4 / Id2 / Plac8 / Pou2f2 / Pycard / Runx3
GO:0034655	nucleobase-containing compound catabolic process	347	1	1.46	1623	0.77305	0.77305	Samhd1
GO:0070647	protein modification by small protein conjugation or removal	662	2	2.79	1624	0.77488	0.77488	Gbp4 / Rnf138
GO:0045595	regulation of cell differentiation	1508	5	6.35	1625	0.77534	0.77534	Ccl5 / Id2 / Lgals1 / Runx3 / S100a10
GO:0045935	positive regulation of nucleobase-containing compound metabolic process	1511	5	6.37	1626	0.77687	0.77687	Batf / Id2 / Plac8 / Pou2f2 / Runx3
GO:0044703	multi-organism reproductive process	667	2	2.81	1627	0.77851	0.77851	H2-Q7 / Phc2
GO:0010639	negative regulation of organelle organization	354	1	1.49	1628	0.77982	0.77982	Gmfg
GO:0006163	purine nucleotide metabolic process	354	1	1.49	1629	0.77982	0.77982	Samhd1
GO:0044770	cell cycle phase transition	354	1	1.49	1630	0.77982	0.77982	Id2
GO:0002376	immune system process	1950	31	8.22	4	0.78045	3.1e-12	Actg1 / Batf / Ccl5 / Cd8a / Dbnl / Gbp2 / Gbp4 / Gbp6 / Gzmb / H2-Q7 / H2-T23 / Hba-a1 / Hba-a2 / Id2 / Il10rb / Itgb7 / Lgals1 / Mx1 / Oas3 / Pou2f2 / Pycard / Rac2 / Rpl13a / Runx3 / Samhd1 / Selplg / Spn / Tap1 / Tapbp / Trafd1 / Zbp1
GO:0031327	negative regulation of cellular biosynthetic process	1244	4	5.24	1631	0.78057	0.78057	Gbp4 / Id2 / Rpl13a / Runx3
GO:0060537	muscle tissue development	358	1	1.51	1632	0.7836	0.7836	Id2
GO:0032268	regulation of cellular protein metabolic process	2064	7	8.7	1633	0.78547	0.78547	Ccl5 / Gbp4 / Ifi27l2a / Pycard / Rpl13a / Slc9a3r1 / Spn
GO:0045666	positive regulation of neuron differentiation	361	1	1.52	1634	0.7864	0.7864	Ccl5
GO:0031326	regulation of cellular biosynthetic process	2848	10	12	1635	0.78682	0.78682	Batf / Ccl5 / Gbp4 / Id2 / Plac8 / Pou2f2 / Pycard / Rpl13a / Runx3 / Spn
GO:0010605	negative regulation of macromolecule metabolic process	2069	7	8.72	1636	0.78765	0.78765	Gbp4 / Gzma / Id2 / Pycard / Rpl13a / Runx3 / Slc9a3r1
GO:0010817	regulation of hormone levels	363	1	1.53	1637	0.78824	0.78824	Ccl5
GO:0070925	organelle assembly	681	2	2.87	1638	0.7884	0.7884	Actg1 / Dbnl
GO:0042221	response to chemical	2805	19	11.82	219	0.79013	0.01899	Actg1 / Ccl5 / Crip1 / Gbp2 / Gbp4 / Gbp6 / H2-Q7 / Hba-a1 / Id2 / Igtp / Il10rb / Pycard / Rac2 / Rnf138 / Rpl13a / Runx3 / S100a10 / Samhd1 / Zbp1
GO:0007283	spermatogenesis	366	1	1.54	1639	0.79097	0.79097	Phc2
GO:0071900	regulation of protein serine/threonine kinase activity	369	1	1.55	1640	0.79367	0.79367	Pycard
GO:0016310	phosphorylation	1820	6	7.67	1641	0.79544	0.79544	Ccl5 / Gbp4 / Pycard / Runx3 / Slc9a3r1 / Spn
GO:0051186	cofactor metabolic process	401	3	1.69	988	0.79632	0.23868	Hba-a1 / Hbb-bt / Mdh1
GO:0061564	axon development	372	1	1.57	1642	0.79634	0.79634	Runx3
GO:0033365	protein localization to organelle	694	2	2.92	1643	0.79724	0.79724	Gbp2 / Gbp4
GO:0009890	negative regulation of biosynthetic process	1278	4	5.38	1645	0.79854	0.79854	Gbp4 / Id2 / Rpl13a / Runx3
GO:0023061	signal release	375	1	1.58	1646	0.79897	0.79897	Ccl5
GO:0033993	response to lipid	552	5	2.33	539	0.80001	0.08248	Ccl5 / Gbp2 / Gbp6 / Pycard / Rpl13a
GO:0016477	cell migration	1154	9	4.86	414	0.80056	0.05139	Anxa6 / Ccl5 / Itgb7 / Pycard / Rac2 / Rpl13a / Selplg / Slc9a3r1 / Spn
GO:0045892	negative regulation of transcription, DNA-templated	997	3	4.2	1648	0.80078	0.80078	Gbp4 / Id2 / Runx3
GO:0044270	cellular nitrogen compound catabolic process	379	1	1.6	1649	0.80242	0.80242	Samhd1
GO:1903507	negative regulation of nucleic acid-templated transcription	1000	3	4.21	1650	0.80246	0.80246	Gbp4 / Id2 / Runx3
GO:1902679	negative regulation of RNA biosynthetic process	1000	3	4.21	1651	0.80246	0.80246	Gbp4 / Id2 / Runx3
GO:0046700	heterocycle catabolic process	383	1	1.61	1652	0.80582	0.80582	Samhd1
GO:0072521	purine-containing compound metabolic process	383	1	1.61	1653	0.80582	0.80582	Samhd1
GO:0048232	male gamete generation	385	1	1.62	1654	0.8075	0.8075	Phc2
GO:0031401	positive regulation of protein modification process	1010	3	4.26	1655	0.808	0.808	Ccl5 / Pycard / Spn
GO:0009889	regulation of biosynthetic process	2909	10	12.26	1656	0.80953	0.80953	Batf / Ccl5 / Gbp4 / Id2 / Plac8 / Pou2f2 / Pycard / Rpl13a / Runx3 / Spn
GO:0032270	positive regulation of cellular protein metabolic process	1300	4	5.48	1657	0.80955	0.80955	Ccl5 / Ifi27l2a / Pycard / Spn
GO:0009059	macromolecule biosynthetic process	3423	12	14.42	1658	0.80974	0.80974	Batf / Ccl5 / Gbp4 / Id2 / Plac8 / Pou2f2 / Pycard / Rpl13a / Runx3 / Samhd1 / Spn / Zdhhc18
GO:0031325	positive regulation of cellular metabolic process	2650	9	11.17	1659	0.80985	0.80985	Batf / Ccl5 / Id2 / Ifi27l2a / Plac8 / Pou2f2 / Pycard / Runx3 / Spn
GO:0007600	sensory perception	388	1	1.63	1660	0.80999	0.80999	Slc9a3r1
[truncated: 6,909 more rows]

## Sheet: TopGO analysis CD47 vs Control
GO.ID	Term	Annotated	Significant	Expected	Rank in Fisher.classic	Fisher.elim	Fisher.classic	Sig.Gene
[truncated: 8,436 more rows]

[truncated: 2 more sheets: TopGO analysis PD-L1 vs Control, GSE analysis BisAb vs Control]
