# Supplementary material for: Dual checkpoint blockade of CD47 and PD-L1 using an affinity-tuned bispecific antibody maximizes antitumor immunity
Source: HighWire-hosted journal article supplement (doi:10.1136/jitc-2021-003464), 2021-10-01
Supplement: jitc-2021-003464supp008_data_supplement.xlsx [file jitc-2021-003464supp008_data_supplement.xlsx]

## Sheet: Cluster 1
	gene_name	pval	exp_case	exp_control	pct_case	pct_control	adjust_pval	pct_diff	rawLog2FoldChange	direction
Igfbp4	Igfbp4	3.3e-53	172.8	58	0.388	0.14	1e-50	0.25	1.57	UP
Tdrp	Tdrp	6.3e-25	75	29	0.269	0.12	4.2e-23	0.15	1.36	UP
Rgcc	Rgcc	9.2e-28	120.6	48	0.347	0.18	7.4e-26	0.17	1.32	UP
Ccr9	Ccr9	2.2e-42	166.4	68	0.371	0.14	3.8e-40	0.23	1.29	UP
Fam241a	Fam241a	3.7e-21	102.9	44	0.333	0.19	1.9e-19	0.14	1.23	UP
Dapl1	Dapl1	5.3e-68	513.7	221	0.595	0.26	3e-65	0.33	1.22	UP
Ccr7	Ccr7	2.1e-58	265	118	0.621	0.33	8.3e-56	0.29	1.16	UP
Il6ra	Il6ra	4.9e-31	116.3	53	0.39	0.2	4.9e-29	0.19	1.14	UP
Als2cl	Als2cl	3.6e-18	66.8	31	0.256	0.13	1.4e-16	0.12	1.12	UP
Lef1	Lef1	9.1e-88	543.8	254	0.847	0.57	2.2e-84	0.27	1.1	UP
Pik3ip1	Pik3ip1	1.4e-36	180.6	86	0.506	0.29	1.8e-34	0.21	1.07	UP
Gm20696	Gm20696	1.1e-12	65.2	32	0.252	0.15	2.3e-11	0.1	1.02	UP
Actn1	Actn1	3.7e-29	190.4	97	0.519	0.33	3.3e-27	0.19	0.97	UP
Rflnb	Rflnb	8.5e-18	114	59	0.34	0.2	3.2e-16	0.14	0.96	UP
Pdk1	Pdk1	5.5e-19	122.6	65	0.401	0.26	2.3e-17	0.14	0.93	UP
Inpp4b	Inpp4b	7.2e-30	211.4	112	0.561	0.37	6.8e-28	0.19	0.92	UP
Ramp1	Ramp1	1.2e-18	84.1	44	0.301	0.16	4.9e-17	0.14	0.92	UP
Sh3bp5	Sh3bp5	2.1e-14	82.6	45	0.303	0.19	5.4e-13	0.11	0.89	UP
Slfn5	Slfn5	1.5e-07	74.7	41	0.204	0.13	1.6e-06	0.074	0.87	UP
Satb1	Satb1	7.7e-55	495.9	277	0.816	0.57	2.6e-52	0.24	0.84	UP
Treml2	Treml2	5.2e-11	74.8	42	0.285	0.19	9.2e-10	0.098	0.84	UP
Slc12a7	Slc12a7	3.2e-12	91.1	51	0.323	0.21	6.4e-11	0.11	0.82	UP
Pecam1	Pecam1	5.6e-12	109.2	63	0.35	0.25	1.1e-10	0.1	0.8	UP
Tmem108	Tmem108	4.1e-11	58.2	34	0.235	0.14	7.3e-10	0.094	0.79	UP
Znrf1	Znrf1	3.2e-10	77.7	45	0.302	0.21	5.1e-09	0.093	0.79	UP
Bach2	Bach2	1.3e-11	85.7	50	0.291	0.19	2.4e-10	0.1	0.78	UP
Dph5	Dph5	1.1e-09	104.8	61	0.347	0.26	1.7e-08	0.086	0.78	UP
Fam78a	Fam78a	9.2e-19	174.7	103	0.509	0.38	3.8e-17	0.13	0.76	UP
Card6	Card6	2.6e-07	55.6	33	0.222	0.15	2.6e-06	0.071	0.76	UP
Cmah	Cmah	9.6e-24	272.8	162	0.608	0.47	5.9e-22	0.14	0.75	UP
Il6st	Il6st	2.6e-11	93.6	56	0.33	0.23	4.7e-10	0.1	0.75	UP
Tanc1	Tanc1	6.1e-08	59.4	35	0.233	0.16	6.8e-07	0.077	0.75	UP
Mettl9	Mettl9	5.1e-05	58.2	35	0.239	0.19	0.00032	0.05	0.75	UP
Fam169b	Fam169b	4.2e-16	159.9	96	0.453	0.33	1.3e-14	0.13	0.74	UP
Tsc22d3	Tsc22d3	8.2e-22	207.9	125	0.542	0.39	4.4e-20	0.16	0.73	UP
Gm12840	Gm12840	1.1e-11	166.5	100	0.331	0.22	2e-10	0.11	0.73	UP
Scml4	Scml4	3.7e-12	96	58	0.339	0.23	7.3e-11	0.11	0.72	UP
Epb41l4aos	Epb41l4aos	5.3e-06	72.3	44	0.266	0.21	4.1e-05	0.06	0.72	UP
Rapgef6	Rapgef6	7.2e-36	427.8	264	0.771	0.66	8.8e-34	0.11	0.7	UP
Selenop	Selenop	1e-05	63.2	39	0.221	0.16	7.6e-05	0.059	0.69	UP
Washc4	Washc4	3.9e-05	50.7	31	0.203	0.15	0.00025	0.054	0.69	UP
Ndrg3	Ndrg3	0.0053	55.1	34	0.212	0.18	0.019	0.031	0.69	UP
Ssbp2	Ssbp2	7.8e-08	72.6	45	0.268	0.19	8.5e-07	0.079	0.68	UP
Il7r	Il7r	4.8e-27	581.7	364	0.704	0.53	3.8e-25	0.18	0.67	UP
Npc2	Npc2	1.4e-42	539	340	0.852	0.75	2.6e-40	0.11	0.66	UP
Gpatch4	Gpatch4	0.00074	64.7	41	0.243	0.2	0.0035	0.041	0.66	UP
Gramd1a	Gramd1a	4.9e-13	160.8	103	0.483	0.37	1.1e-11	0.11	0.65	UP
Pde3b	Pde3b	5.2e-11	108.5	69	0.373	0.27	9.2e-10	0.11	0.65	UP
Kif1b	Kif1b	2.7e-06	94.6	60	0.301	0.24	2.2e-05	0.064	0.65	UP
Sell	Sell	9.8e-36	495.2	318	0.795	0.57	1.2e-33	0.23	0.64	UP
Grap2	Grap2	4.8e-24	274.4	177	0.665	0.53	3.1e-22	0.13	0.63	UP
Art2b	Art2b	6.6e-05	64	42	0.241	0.19	0.00041	0.053	0.63	UP
Sipa1l1	Sipa1l1	7.8e-05	76.4	49	0.278	0.23	0.00047	0.051	0.63	UP
N4bp2	N4bp2	0.00042	63.7	41	0.239	0.19	0.0021	0.046	0.63	UP
Peli1	Peli1	1.1e-26	390.3	254	0.746	0.63	8.7e-25	0.11	0.62	UP
Klf7	Klf7	5e-06	79.9	52	0.282	0.22	3.9e-05	0.065	0.62	UP
Cd2ap	Cd2ap	0.00013	74	49	0.274	0.22	0.00074	0.052	0.6	UP
Foxp1	Foxp1	7.2e-28	471.3	314	0.794	0.68	5.9e-26	0.12	0.59	UP
Tet3	Tet3	8.4e-10	136.3	91	0.445	0.36	1.3e-08	0.087	0.59	UP
Dpp4	Dpp4	1.2e-08	93.2	62	0.337	0.25	1.5e-07	0.09	0.59	UP
Tbxa2r	Tbxa2r	0.0012	52.3	35	0.206	0.16	0.0052	0.042	0.59	UP
Ikbke	Ikbke	4.4e-07	75.8	51	0.29	0.21	4.2e-06	0.075	0.58	UP
Itk	Itk	7.3e-14	222.9	150	0.597	0.5	1.8e-12	0.093	0.57	UP
Tcp11l2	Tcp11l2	2.9e-07	79.1	53	0.302	0.22	2.9e-06	0.08	0.57	UP
Cd55	Cd55	5.6e-05	58.4	39	0.226	0.17	0.00035	0.058	0.57	UP
Aff3	Aff3	0.00035	51.2	34	0.213	0.17	0.0018	0.047	0.57	UP
Pde4b	Pde4b	0.00066	58	39	0.219	0.17	0.0031	0.046	0.57	UP
Setx	Setx	1.6e-09	182.8	124	0.509	0.44	2.3e-08	0.073	0.56	UP
Ppm1h	Ppm1h	1.4e-08	110.5	75	0.389	0.3	1.7e-07	0.085	0.56	UP
Ttc3	Ttc3	2e-07	144.3	98	0.427	0.35	2e-06	0.072	0.56	UP
Gm26551	Gm26551	7e-05	48.1	33	0.204	0.15	0.00043	0.053	0.56	UP
Cep97	Cep97	0.0018	55.2	38	0.208	0.17	0.0075	0.039	0.56	UP
Rgs10	Rgs10	9.9e-14	192.7	131	0.534	0.4	2.4e-12	0.13	0.55	UP
Stk38	Stk38	1.4e-13	270.2	186	0.639	0.55	3.2e-12	0.085	0.54	UP
Slfn1	Slfn1	1.3e-09	139.7	96	0.43	0.34	1.9e-08	0.093	0.54	UP
Dopey1	Dopey1	0.00053	69.4	48	0.259	0.21	0.0026	0.046	0.54	UP
Tcf7	Tcf7	5.4e-23	378	262	0.745	0.6	3.2e-21	0.15	0.53	UP
Kdm5b	Kdm5b	1.9e-05	64.1	44	0.25	0.18	0.00013	0.065	0.53	UP
Gm20186	Gm20186	0.0001	57.9	40	0.226	0.17	0.00059	0.055	0.53	UP
Fam208b	Fam208b	0.00083	103.5	72	0.34	0.3	0.0038	0.04	0.53	UP
Filip1l	Filip1l	0.014	56.6	39	0.204	0.18	0.042	0.028	0.53	UP
Cd8b1	Cd8b1	5.1e-43	1241.1	863	0.953	0.67	9.2e-41	0.28	0.52	UP
Dgka	Dgka	6.7e-14	255	178	0.642	0.55	1.6e-12	0.095	0.52	UP
Ifi213	Ifi213	9.6e-08	102.8	72	0.345	0.26	1e-06	0.085	0.52	UP
Gm10073	Gm10073	2.2e-05	106.4	74	0.38	0.33	0.00015	0.053	0.52	UP
Dip2b	Dip2b	2.6e-05	67.8	47	0.273	0.21	0.00017	0.059	0.52	UP
Rps29	Rps29	1.8e-68	12164.3	8566	1	1	1.1e-65		0.51	UP
Rps28	Rps28	5.5e-59	4972.1	3480	0.999	0.99	2.2e-56	0.0085	0.51	UP
Nsg2	Nsg2	5.9e-10	124.3	87	0.424	0.32	9e-09	0.11	0.51	UP
Ift80	Ift80	6.1e-06	65.9	46	0.231	0.17	4.7e-05	0.064	0.51	UP
Snhg12	Snhg12	9.1e-05	87.1	61	0.316	0.26	0.00054	0.053	0.51	UP
S1pr1	S1pr1	3.1e-15	270	191	0.644	0.52	8.8e-14	0.13	0.5	UP
Themis	Themis	1.1e-10	186.4	132	0.527	0.42	1.8e-09	0.1	0.5	UP
Itga6	Itga6	0.0091	59.3	42	0.217	0.19	0.03	0.032	0.5	UP
Smad7	Smad7	1.3e-11	182.3	130	0.536	0.43	2.5e-10	0.1	0.49	UP
Pced1b	Pced1b	0.00094	52.4	37	0.218	0.17	0.0042	0.046	0.49	UP
Jun	Jun	0.016	100.8	72	0.269	0.24	0.049	0.027	0.48	UP
Tnrc6b	Tnrc6b	1.3e-13	298.7	215	0.684	0.61	3e-12	0.072	0.47	UP
Slamf6	Slamf6	9.6e-10	257.8	186	0.578	0.49	1.4e-08	0.084	0.47	UP
4932438A13Rik	4932438A13Rik	1.3e-07	208.2	150	0.547	0.49	1.4e-06	0.058	0.47	UP
Ifi214	Ifi214	3.4e-06	89.7	65	0.317	0.24	2.7e-05	0.074	0.47	UP
Zeb1	Zeb1	0.00051	89.7	65	0.319	0.28	0.0025	0.041	0.47	UP
Uvrag	Uvrag	0.0057	57.6	42	0.232	0.2	0.02	0.034	0.47	UP
Rps24	Rps24	7.5e-108	12294.3	8957	1	1	3.7e-104		0.46	UP
Rps27	Rps27	3.1e-73	9341.8	6801	1	1	3.6e-70		0.46	UP
Cd8a	Cd8a	5.2e-24	498.9	362	0.808	0.61	3.3e-22	0.2	0.46	UP
Ssh2	Ssh2	9.5e-13	256.8	186	0.631	0.53	2e-11	0.097	0.46	UP
4930523C07Rik	4930523C07Rik	2.1e-12	279.1	202	0.654	0.57	4.2e-11	0.084	0.46	UP
Ikbkb	Ikbkb	1.4e-08	179.7	131	0.538	0.47	1.8e-07	0.064	0.46	UP
Sun2	Sun2	6.8e-05	126.1	92	0.411	0.36	0.00042	0.048	0.46	UP
Mycbp2	Mycbp2	5.9e-15	376.6	275	0.764	0.7	1.7e-13	0.067	0.45	UP
Cyth1	Cyth1	1.5e-06	107.7	79	0.395	0.32	1.3e-05	0.072	0.45	UP
Tgfbr2	Tgfbr2	0.0002	113.6	83	0.388	0.34	0.0011	0.05	0.45	UP
H2-DMa	H2-DMa	0.002	53.3	39	0.216	0.17	0.0082	0.042	0.45	UP
Il4ra	Il4ra	0.0025	66.2	48	0.261	0.22	0.0097	0.042	0.45	UP
Epc2	Epc2	0.005	57.2	42	0.237	0.2	0.018	0.034	0.45	UP
Mbnl2	Mbnl2	0.0069	72.4	53	0.279	0.24	0.023	0.034	0.45	UP
Crlf3	Crlf3	5.7e-07	272.2	201	0.616	0.59	5.3e-06	0.028	0.44	UP
Smarca2	Smarca2	1.6e-05	110.8	82	0.382	0.32	0.00012	0.059	0.44	UP
Ankhd1	Ankhd1	0.0075	90.2	66	0.318	0.29	0.025	0.024	0.44	UP
Chd6	Chd6	0.01	93.8	69	0.311	0.29	0.032	0.026	0.44	UP
Gramd4	Gramd4	0.014	72	53	0.279	0.25	0.042	0.03	0.44	UP
Rpl5	Rpl5	5.8e-69	3197.1	2379	0.994	0.99	4.3e-66	0.00083	0.43	UP
Kmt2a	Kmt2a	3.2e-12	305.6	226	0.69	0.6	6.3e-11	0.086	0.43	UP
Stat1	Stat1	5.3e-09	336.5	251	0.63	0.56	7e-08	0.066	0.43	UP
Chd2	Chd2	1.6e-07	221	164	0.559	0.5	1.7e-06	0.061	0.43	UP
Madd	Madd	2.8e-05	124.4	93	0.419	0.36	0.00019	0.058	0.43	UP
Rpl12	Rpl12	6.2e-70	6027.7	4500	1	1	5.1e-67	0.0032	0.42	UP
Rps19	Rps19	2.6e-69	6350.6	4752	1	1	2e-66	0.0016	0.42	UP
Plcxd2	Plcxd2	0.00081	56.8	42	0.223	0.17	0.0037	0.049	0.42	UP
Retreg1	Retreg1	0.01	55.9	42	0.233	0.2	0.033	0.032	0.42	UP
Rps21	Rps21	2.1e-73	7159.6	5377	1	1	2.6e-70	0.00053	0.41	UP
Rps20	Rps20	1.4e-62	7698.1	5812	1	1	6.5e-60	0.0021	0.41	UP
Rpl35	Rpl35	1.1e-53	2682.6	2025	0.998	0.98	3.6e-51	0.015	0.41	UP
Klf13	Klf13	1.1e-13	315.9	239	0.727	0.65	2.7e-12	0.076	0.41	UP
Add3	Add3	1.1e-07	195.8	147	0.572	0.51	1.2e-06	0.062	0.41	UP
Kmt2c	Kmt2c	4.8e-06	160.1	121	0.477	0.41	3.7e-05	0.067	0.41	UP
Rpl10-ps3	Rpl10-ps3	0.00071	135.1	102	0.449	0.43	0.0033	0.02	0.41	UP
Trpm7	Trpm7	0.0034	81.6	62	0.307	0.27	0.013	0.033	0.41	UP
Zfp281	Zfp281	0.0097	52.2	39	0.208	0.17	0.032	0.034	0.41	UP
Epc1	Epc1	0.014	63.9	48	0.258	0.23	0.043	0.029	0.41	UP
Evl	Evl	2.4e-12	268.6	204	0.682	0.59	4.9e-11	0.094	0.4	UP
Etnk1	Etnk1	5.6e-05	162.3	123	0.492	0.45	0.00035	0.041	0.4	UP
Rpl35a	Rpl35a	4.2e-80	4995.6	3818	1	1	6.9e-77	0.0032	0.39	UP
Rplp1	Rplp1	1.8e-75	10228.9	7786	1	1	2.5e-72	0.00053	0.39	UP
Arhgap15	Arhgap15	2.5e-09	315.3	241	0.691	0.65	3.5e-08	0.044	0.39	UP
Fam189b	Fam189b	2.6e-07	173.5	132	0.522	0.46	2.6e-06	0.058	0.39	UP
Fam208a	Fam208a	5.7e-05	137.8	105	0.444	0.39	0.00036	0.05	0.39	UP
Mgst2	Mgst2	0.0042	75.6	58	0.291	0.25	0.015	0.042	0.39	UP
Rpl36a	Rpl36a	1.3e-46	2543.6	1949	0.997	0.98	3e-44	0.02	0.38	UP
mt-Nd4l	mt-Nd4l	1.2e-08	336.1	259	0.697	0.64	1.5e-07	0.059	0.38	UP
Zfp292	Zfp292	2e-06	227	175	0.574	0.54	1.7e-05	0.032	0.38	UP
Nin	Nin	0.0099	95.9	74	0.338	0.31	0.032	0.028	0.38	UP
Rps6ka3	Rps6ka3	0.014	88	68	0.319	0.29	0.042	0.028	0.38	UP
Rpl37a	Rpl37a	2.6e-68	7067.1	5474	1	1	1.5e-65	0.0011	0.37	UP
Eef1b2	Eef1b2	6.7e-41	2188.7	1693	0.991	0.97	1.1e-38	0.019	0.37	UP
Btg1	Btg1	1.3e-23	1283	992	0.941	0.9	7.7e-22	0.037	0.37	UP
Rps27rt	Rps27rt	8.5e-14	427.9	331	0.765	0.7	2e-12	0.067	0.37	UP
Utrn	Utrn	4.2e-10	309.9	239	0.681	0.62	6.5e-09	0.058	0.37	UP
Orai2	Orai2	0.0011	72.1	56	0.281	0.23	0.0047	0.048	0.37	UP
Rpl31	Rpl31	1.9e-26	1038.4	811	0.966	0.92	1.4e-24	0.045	0.36	UP
Cox7a2l	Cox7a2l	5.3e-20	602.4	468	0.902	0.85	2.5e-18	0.047	0.36	UP
Saraf	Saraf	5.2e-12	350.6	273	0.76	0.7	1e-10	0.064	0.36	UP
Wdr89	Wdr89	9.4e-10	297.6	232	0.7	0.64	1.4e-08	0.056	0.36	UP
Rhoh	Rhoh	3.5e-09	283.4	221	0.683	0.62	4.8e-08	0.06	0.36	UP
Klhl24	Klhl24	0.00019	87.1	68	0.315	0.26	0.0011	0.058	0.36	UP
Prkd2	Prkd2	0.0019	93.5	73	0.348	0.31	0.0077	0.042	0.36	UP
Rb1cc1	Rb1cc1	0.0033	125.3	98	0.405	0.37	0.012	0.031	0.36	UP
Phc3	Phc3	0.013	82.4	64	0.299	0.27	0.041	0.026	0.36	UP
Tpt1	Tpt1	3e-84	10632.2	8344	1	1	5.6e-81		0.35	UP
Rps3a1	Rps3a1	2e-67	5625.4	4423	1	1	1.1e-64	0.0011	0.35	UP
Rps7	Rps7	2.4e-55	5884.1	4619	0.999	1	8.5e-53	5.1e-05	0.35	UP
Clk1	Clk1	1.2e-09	320.4	251	0.67	0.62	1.8e-08	0.047	0.35	UP
Zbtb20	Zbtb20	6.9e-07	171	135	0.424	0.34	6.3e-06	0.087	0.35	UP
Numa1	Numa1	0.00094	163.7	128	0.485	0.47	0.0042	0.018	0.35	UP
Psme2b	Psme2b	0.011	52.8	41	0.217	0.18	0.036	0.034	0.35	UP
Rps4x	Rps4x	1.5e-54	4955.1	3907	0.998	1	4.9e-52	-0.00042	0.34	UP
Rps26	Rps26	8.7e-46	3613.4	2861	1	0.99	1.9e-43	0.0058	0.34	UP
Zcchc7	Zcchc7	1.1e-06	191.5	151	0.575	0.52	1e-05	0.059	0.34	UP
Rasgrp1	Rasgrp1	0.0024	120.4	95	0.407	0.37	0.0097	0.039	0.34	UP
Tmem71	Tmem71	0.0076	126.4	100	0.386	0.35	0.026	0.031	0.34	UP
Rplp2	Rplp2	2.4e-62	5468.6	4340	0.998	1	1.1e-59	-0.00095	0.33	UP
Rps8	Rps8	3.9e-60	6870.5	5478	1	1	1.7e-57	0.00053	0.33	UP
Rpl23	Rpl23	5e-58	7451.6	5933	1	1	1.9e-55		0.33	UP
Rpl26	Rpl26	5.2e-50	3974.2	3159	0.999	1	1.4e-47	5.1e-05	0.33	UP
Rps25	Rps25	3.4e-41	2173.4	1727	0.993	0.99	5.6e-39	0.0077	0.33	UP
Malat1	Malat1	1.1e-32	31289.8	24856	1	1	1.2e-30	0.0016	0.33	UP
Bcl11b	Bcl11b	9e-09	361.4	288	0.72	0.67	1.1e-07	0.049	0.33	UP
Vps37b	Vps37b	1.7e-05	193.2	154	0.462	0.4	0.00012	0.067	0.33	UP
Slc44a2	Slc44a2	2.8e-05	152.9	122	0.502	0.45	0.00019	0.055	0.33	UP
Prdx6	Prdx6	0.0012	164.7	131	0.503	0.48	0.0054	0.022	0.33	UP
Rnf167	Rnf167	0.0016	129.3	103	0.43	0.39	0.0068	0.036	0.33	UP
Mdn1	Mdn1	0.0045	79.8	63	0.289	0.25	0.017	0.039	0.33	UP
Rps15a	Rps15a	5.8e-53	7044	5654	0.999	1	1.7e-50	0.00058	0.32	UP
Rpl37	Rpl37	1.1e-48	5234.3	4204	1	1	2.7e-46	0.0037	0.32	UP
Akap13	Akap13	5.6e-12	562.3	449	0.836	0.82	1.1e-10	0.019	0.32	UP
Pik3cd	Pik3cd	3.2e-05	200.7	161	0.557	0.52	0.00021	0.036	0.32	UP
Phf3	Phf3	7.7e-05	187.8	150	0.552	0.51	0.00046	0.042	0.32	UP
Adcy7	Adcy7	0.0038	149.7	120	0.462	0.44	0.014	0.021	0.32	UP
Rpl13	Rpl13	1.3e-47	8593.9	6937	1	1	3.3e-45		0.31	UP
Rps15	Rps15	2.4e-46	3642.6	2938	0.997	1	5.3e-44	0.00015	0.31	UP
Emb	Emb	7.8e-12	400.5	324	0.73	0.63	1.5e-10	0.097	0.31	UP
Eif4a2	Eif4a2	8.5e-06	227.8	183	0.608	0.58	6.3e-05	0.029	0.31	UP
Top2b	Top2b	2.5e-05	253	204	0.626	0.59	0.00017	0.034	0.31	UP
Acp5	Acp5	2.9e-05	202.1	163	0.563	0.53	0.00019	0.035	0.31	UP
Dock10	Dock10	0.00023	280.9	227	0.646	0.62	0.0013	0.022	0.31	UP
Dyrk2	Dyrk2	0.0062	72.1	58	0.288	0.25	0.022	0.037	0.31	UP
Map4k2	Map4k2	0.016	92.1	75	0.349	0.32	0.047	0.028	0.31	UP
Rps9	Rps9	2e-49	5015.4	4074	0.998	1	5.2e-47	0.0001	0.3	UP
Rps16	Rps16	3.6e-47	7825	6359	1	1	8.6e-45		0.3	UP
Rpl30	Rpl30	1.5e-46	5169.4	4189	0.997	1	3.3e-44	-0.003	0.3	UP
Rps18	Rps18	7e-46	6028.5	4888	0.999	1	1.5e-43	-0.00047	0.3	UP
Rpl39	Rpl39	1.3e-45	6513.8	5282	1	1	2.6e-43	0.0011	0.3	UP
Rpl8	Rpl8	7.1e-44	4396.2	3561	0.999	1	1.3e-41	0.0022	0.3	UP
Ltb	Ltb	7.9e-15	736.7	600	0.898	0.81	2.1e-13	0.086	0.3	UP
Pnrc1	Pnrc1	3.1e-08	279.4	227	0.675	0.63	3.7e-07	0.049	0.3	UP
Klk8	Klk8	3e-05	171.1	139	0.515	0.46	0.0002	0.056	0.3	UP
Nsd3	Nsd3	9.9e-05	288.9	234	0.657	0.64	0.00058	0.019	0.3	UP
Tnrc6c	Tnrc6c	0.0004	183.2	149	0.542	0.52	0.002	0.023	0.3	UP
Use1	Use1	0.00095	152.8	124	0.491	0.46	0.0043	0.028	0.3	UP
Tnik	Tnik	0.0084	129.6	106	0.413	0.39	0.028	0.025	0.3	UP
Foxo1	Foxo1	0.0089	138.4	112	0.435	0.42	0.029	0.017	0.3	UP
Mrpl24	Mrpl24	0.012	125.6	102	0.436	0.42	0.039	0.015	0.3	UP
Rpl6	Rpl6	1.1e-43	3924.9	3208	0.998	1	2e-41	0.0017	0.29	UP
Rpl38	Rpl38	3.4e-30	5636.7	4611	1	1	3.3e-28	0.0011	0.29	UP
Arl4c	Arl4c	1.9e-12	440.7	360	0.793	0.7	3.9e-11	0.094	0.29	UP
Nsa2	Nsa2	2.5e-12	721.7	588	0.884	0.86	5e-11	0.023	0.29	UP
Rasal3	Rasal3	0.0017	155.6	127	0.498	0.48	0.0072	0.022	0.29	UP
Ubn2	Ubn2	0.006	119.4	98	0.403	0.37	0.021	0.029	0.29	UP
Crebrf	Crebrf	0.0091	83.7	69	0.293	0.26	0.03	0.038	0.29	UP
Rpl36	Rpl36	2.6e-39	4120	3392	0.999	1	3.9e-37	-0.00047	0.28	UP
Rpl21	Rpl21	1.1e-38	4861.1	4016	0.997	1	1.5e-36	-0.0014	0.28	UP
Rps6	Rps6	3.1e-34	2949.9	2429	0.999	1	3.6e-32	0.0027	0.28	UP
Rpl23a	Rpl23a	3.1e-27	2498.2	2055	0.994	0.99	2.4e-25	0.0045	0.28	UP
Ablim1	Ablim1	4.9e-08	467.2	386	0.809	0.8	5.6e-07	0.0055	0.28	UP
Prkcq	Prkcq	5.4e-07	222.2	184	0.615	0.56	5e-06	0.056	0.28	UP
Tnrc6a	Tnrc6a	6.6e-06	181.8	149	0.542	0.49	5e-05	0.054	0.28	UP
Sptbn1	Sptbn1	0.00013	247	203	0.599	0.58	0.00077	0.023	0.28	UP
Bptf	Bptf	0.00026	298	246	0.679	0.66	0.0014	0.018	0.28	UP
mt-Atp8	mt-Atp8	0.00045	229.4	189	0.562	0.51	0.0022	0.052	0.28	UP
Lars2	Lars2	0.0011	189.1	155	0.547	0.52	0.0049	0.028	0.28	UP
Nisch	Nisch	0.011	139.2	115	0.437	0.42	0.034	0.017	0.28	UP
Smap2	Smap2	0.015	170.6	140	0.499	0.49	0.045	0.0045	0.28	UP
Bcl9l	Bcl9l	0.015	91.4	76	0.333	0.3	0.046	0.032	0.28	UP
Rps14	Rps14	2.4e-46	6045.5	5009	0.999	1	5.3e-44	-0.001	0.27	UP
Rps23	Rps23	5e-41	5031.1	4184	0.998	1	8.2e-39	-0.0015	0.27	UP
Rps27a	Rps27a	3.3e-40	5276.2	4361	0.999	1	5.1e-38	0.0011	0.27	UP
Rpl17	Rpl17	2.5e-38	5762.1	4792	1	1	3.5e-36	0.00053	0.27	UP
Rpl27a	Rpl27a	2.8e-38	5978.6	4956	1	1	3.8e-36		0.27	UP
mt-Nd2	mt-Nd2	1.6e-26	2765.5	2298	0.995	0.99	1.2e-24	0.0034	0.27	UP
Rps17	Rps17	1e-19	1422.9	1179	0.979	0.95	4.8e-18	0.029	0.27	UP
Ighm	Ighm	5.6e-08	369.5	307	0.692	0.61	6.3e-07	0.08	0.27	UP
Macf1	Macf1	1.8e-07	497	411	0.779	0.75	1.9e-06	0.028	0.27	UP
Ipcef1	Ipcef1	0.00038	176.9	146	0.508	0.47	0.0019	0.035	0.27	UP
Smg1	Smg1	0.0019	165.6	138	0.51	0.48	0.0078	0.031	0.27	UP
Slc38a2	Slc38a2	0.004	254.2	210	0.579	0.58	0.015	0.00097	0.27	UP
Huwe1	Huwe1	0.0076	170.7	142	0.505	0.49	0.026	0.011	0.27	UP
Rpl19	Rpl19	3.9e-42	5748.1	4816	0.999	1	6.8e-40	0.00058	0.26	UP
Bclaf1	Bclaf1	3.8e-06	276.5	231	0.681	0.64	3e-05	0.04	0.26	UP
Txnip	Txnip	9.5e-06	282.1	236	0.645	0.59	7e-05	0.052	0.26	UP
Cytip	Cytip	9e-05	237.2	198	0.623	0.6	0.00054	0.028	0.26	UP
Crebbp	Crebbp	0.0031	151.4	126	0.483	0.46	0.012	0.022	0.26	UP
Rpl7	Rpl7	1.4e-31	2868.5	2408	0.993	0.99	1.4e-29	0.0014	0.25	UP
Rpl14	Rpl14	4.6e-27	2730.4	2288	1	0.99	3.6e-25	0.0068	0.25	UP
Prrc2c	Prrc2c	7.8e-08	624.9	525	0.871	0.86	8.5e-07	0.013	0.25	UP
Nipbl	Nipbl	3.4e-05	259.4	217	0.649	0.62	0.00022	0.034	0.25	UP
Ppp2r5a	Ppp2r5a	0.0019	209.4	176	0.587	0.57	0.0079	0.015	0.25	UP
Coro1a	Coro1a	3.9e-12	1174.7	1402	0.968	0.97	7.7e-11	-0.00047	-0.25	DOWN
Psmb1	Psmb1	4.6e-08	312.7	373	0.723	0.8	5.2e-07	-0.075	-0.25	DOWN
Ghitm	Ghitm	2e-05	90.1	107	0.331	0.43	0.00014	-0.1	-0.25	DOWN
Hspa4	Hspa4	3.4e-05	92.5	110	0.337	0.43	0.00022	-0.094	-0.25	DOWN
Polr2m	Polr2m	4.3e-05	72.1	86	0.277	0.37	0.00028	-0.093	-0.25	DOWN
Mrps14	Mrps14	9.9e-05	107.3	128	0.401	0.49	0.00058	-0.087	-0.25	DOWN
Ppp2r2d	Ppp2r2d	0.0001	35.9	43	0.144	0.21	0.00059	-0.068	-0.25	DOWN
Chrac1	Chrac1	0.00022	56.2	67	0.233	0.31	0.0012	-0.08	-0.25	DOWN
Aprt	Aprt	0.00027	103.8	124	0.369	0.45	0.0014	-0.086	-0.25	DOWN
Tcp1	Tcp1	0.00033	120.3	143	0.417	0.5	0.0017	-0.082	-0.25	DOWN
Sirt7	Sirt7	0.00054	70.4	84	0.281	0.36	0.0026	-0.081	-0.25	DOWN
Sorl1	Sorl1	0.0019	73.9	88	0.286	0.35	0.0079	-0.067	-0.25	DOWN
Arrdc1	Arrdc1	0.002	36.3	43	0.162	0.22	0.008	-0.053	-0.25	DOWN
Dnajb6	Dnajb6	0.0023	127.8	152	0.453	0.52	0.009	-0.065	-0.25	DOWN
Impdh1	Impdh1	0.0048	41.5	49	0.182	0.23	0.017	-0.052	-0.25	DOWN
H2-K1	H2-K1	1.2e-13	2104.8	2528	0.991	0.99	2.8e-12	-0.0027	-0.26	DOWN
Hspa8	Hspa8	4.7e-12	1140.2	1370	0.969	0.97	9.2e-11	-0.00052	-0.26	DOWN
Hnrnpa2b1	Hnrnpa2b1	1.1e-09	528.7	631	0.838	0.89	1.6e-08	-0.051	-0.26	DOWN
Hnrnpa3	Hnrnpa3	1.7e-07	374.7	449	0.769	0.81	1.7e-06	-0.038	-0.26	DOWN
Ssr4	Ssr4	2.3e-07	165.9	198	0.502	0.63	2.3e-06	-0.12	-0.26	DOWN
H2afy	H2afy	4.4e-07	273.5	327	0.669	0.76	4.2e-06	-0.095	-0.26	DOWN
Dazap2	Dazap2	3.6e-06	117.5	141	0.405	0.52	2.9e-05	-0.11	-0.26	DOWN
Dazap1	Dazap1	4e-06	71.6	86	0.272	0.37	3.1e-05	-0.099	-0.26	DOWN
Txnl4a	Txnl4a	5.8e-06	37.8	45	0.154	0.24	4.4e-05	-0.085	-0.26	DOWN
Ndufab1	Ndufab1	1.1e-05	81.8	98	0.315	0.42	8.3e-05	-0.1	-0.26	DOWN
Rtf2	Rtf2	1.5e-05	51.3	62	0.198	0.29	0.00011	-0.088	-0.26	DOWN
Ube2b	Ube2b	1.9e-05	136.2	164	0.449	0.56	0.00013	-0.11	-0.26	DOWN
Cnot6l	Cnot6l	5.8e-05	153.2	183	0.475	0.58	0.00036	-0.1	-0.26	DOWN
Mrps15	Mrps15	6.2e-05	54.8	66	0.227	0.31	0.00039	-0.087	-0.26	DOWN
Ctcf	Ctcf	7.4e-05	151.1	181	0.496	0.58	0.00045	-0.079	-0.26	DOWN
Tmed2	Tmed2	7.5e-05	122.2	146	0.436	0.53	0.00046	-0.091	-0.26	DOWN
Ebna1bp2	Ebna1bp2	9e-05	62.7	75	0.257	0.34	0.00053	-0.082	-0.26	DOWN
Cdc5l	Cdc5l	9.1e-05	94.8	114	0.35	0.44	0.00054	-0.094	-0.26	DOWN
Chmp2a	Chmp2a	0.00011	119.4	143	0.416	0.51	0.00062	-0.095	-0.26	DOWN
Zc3h18	Zc3h18	0.00011	56.3	68	0.218	0.3	0.00064	-0.081	-0.26	DOWN
Snrpb2	Snrpb2	0.00027	73	88	0.287	0.37	0.0014	-0.087	-0.26	DOWN
Pdcd2	Pdcd2	0.00028	38.2	46	0.164	0.23	0.0015	-0.066	-0.26	DOWN
Gpr171	Gpr171	0.0003	34.3	41	0.141	0.2	0.0016	-0.06	-0.26	DOWN
Ptges3	Ptges3	0.00036	88.2	106	0.335	0.41	0.0018	-0.08	-0.26	DOWN
Gadd45gip1	Gadd45gip1	0.00043	73.1	88	0.296	0.38	0.0022	-0.081	-0.26	DOWN
Ift20	Ift20	0.00045	53.4	64	0.216	0.29	0.0023	-0.07	-0.26	DOWN
Tmem131l	Tmem131l	0.0005	59.2	71	0.235	0.31	0.0024	-0.073	-0.26	DOWN
Etfa	Etfa	0.00058	39.9	48	0.178	0.24	0.0028	-0.065	-0.26	DOWN
Lage3	Lage3	0.00067	31.8	38	0.151	0.21	0.0032	-0.059	-0.26	DOWN
Tacc1	Tacc1	0.0008	122.1	147	0.428	0.51	0.0037	-0.079	-0.26	DOWN
Exosc4	Exosc4	0.00083	36.2	43	0.155	0.21	0.0038	-0.059	-0.26	DOWN
Isy1	Isy1	0.0011	44.6	54	0.199	0.26	0.0049	-0.065	-0.26	DOWN
Smarcc2	Smarcc2	0.0012	44.8	54	0.195	0.26	0.0051	-0.062	-0.26	DOWN
Lyar	Lyar	0.0013	50.6	61	0.208	0.27	0.0056	-0.062	-0.26	DOWN
Ythdf1	Ythdf1	0.0014	33.8	40	0.149	0.2	0.006	-0.053	-0.26	DOWN
Adar	Adar	0.0019	40.8	49	0.173	0.23	0.0077	-0.056	-0.26	DOWN
Qars	Qars	0.002	46	55	0.202	0.26	0.0081	-0.06	-0.26	DOWN
Ccdc59	Ccdc59	0.0023	66.6	80	0.268	0.34	0.009	-0.068	-0.26	DOWN
Ric8a	Ric8a	0.0035	35.5	43	0.158	0.21	0.013	-0.051	-0.26	DOWN
Mxd4	Mxd4	0.012	87.7	105	0.306	0.36	0.038	-0.051	-0.26	DOWN
Tpm3	Tpm3	2.7e-10	374.6	450	0.752	0.82	4.3e-09	-0.068	-0.27	DOWN
Gng5	Gng5	9.4e-09	259.7	313	0.672	0.76	1.2e-07	-0.085	-0.27	DOWN
Ftl1	Ftl1	2.5e-08	536.3	646	0.86	0.89	3e-07	-0.034	-0.27	DOWN
Scand1	Scand1	1.3e-06	164.4	198	0.5	0.62	1.1e-05	-0.12	-0.27	DOWN
Psme2	Psme2	4.7e-06	281.9	339	0.691	0.74	3.7e-05	-0.053	-0.27	DOWN
Rdx	Rdx	8.7e-06	113.5	137	0.379	0.48	6.5e-05	-0.1	-0.27	DOWN
Ndufa5	Ndufa5	1.2e-05	83.4	101	0.322	0.42	8.4e-05	-0.1	-0.27	DOWN
Map2k2	Map2k2	1.2e-05	94.1	113	0.348	0.45	8.9e-05	-0.1	-0.27	DOWN
Tsn	Tsn	1.8e-05	118.2	143	0.422	0.52	0.00012	-0.097	-0.27	DOWN
Pcbp1	Pcbp1	2.9e-05	149	179	0.486	0.57	0.00019	-0.088	-0.27	DOWN
Tap1	Tap1	4.7e-05	151.7	182	0.47	0.57	0.0003	-0.096	-0.27	DOWN
Cltc	Cltc	5.1e-05	74.4	90	0.277	0.37	0.00032	-0.09	-0.27	DOWN
Med28	Med28	5.6e-05	67.1	81	0.27	0.36	0.00035	-0.089	-0.27	DOWN
Fam96b	Fam96b	5.9e-05	44.8	54	0.197	0.28	0.00037	-0.08	-0.27	DOWN
Ndufv1	Ndufv1	7.4e-05	47.6	58	0.199	0.28	0.00045	-0.081	-0.27	DOWN
Sema4d	Sema4d	7.5e-05	60.5	73	0.247	0.33	0.00046	-0.082	-0.27	DOWN
Suds3	Suds3	8.8e-05	49.8	60	0.207	0.28	0.00052	-0.077	-0.27	DOWN
Krcc1	Krcc1	9.4e-05	68.2	82	0.261	0.35	0.00056	-0.088	-0.27	DOWN
Hmox2	Hmox2	0.0001	40	48	0.175	0.25	0.0006	-0.073	-0.27	DOWN
Epn1	Epn1	0.00011	51.3	62	0.216	0.29	0.00066	-0.078	-0.27	DOWN
Derl1	Derl1	0.00011	51.4	62	0.224	0.31	0.00066	-0.083	-0.27	DOWN
Ifi35	Ifi35	0.00013	55.2	67	0.221	0.3	0.00072	-0.08	-0.27	DOWN
Vrk3	Vrk3	0.00021	46.5	56	0.193	0.26	0.0011	-0.07	-0.27	DOWN
1700123O20Rik	1700123O20Rik	0.00039	31.3	38	0.141	0.2	0.0019	-0.061	-0.27	DOWN
Lsm7	Lsm7	0.0011	74.6	90	0.3	0.37	0.005	-0.07	-0.27	DOWN
Atp2a3	Atp2a3	0.0018	52.4	63	0.224	0.29	0.0073	-0.068	-0.27	DOWN
Atg12	Atg12	0.0039	37.3	45	0.165	0.22	0.014	-0.051	-0.27	DOWN
Aes	Aes	6e-10	418	508	0.805	0.86	9.1e-09	-0.059	-0.28	DOWN
Zcchc17	Zcchc17	1.1e-06	51.2	62	0.202	0.3	9.5e-06	-0.1	-0.28	DOWN
Flii	Flii	1.2e-06	57.5	70	0.215	0.32	1e-05	-0.1	-0.28	DOWN
Lsm4	Lsm4	1.5e-06	170	206	0.529	0.62	1.3e-05	-0.09	-0.28	DOWN
Pfdn6	Pfdn6	4.4e-06	69.3	84	0.265	0.37	3.5e-05	-0.1	-0.28	DOWN
Suclg1	Suclg1	8.5e-06	71.8	87	0.282	0.39	6.3e-05	-0.1	-0.28	DOWN
Mrpl58	Mrpl58	1.3e-05	86	104	0.324	0.42	9.1e-05	-0.098	-0.28	DOWN
Picalm	Picalm	1.6e-05	79.5	97	0.297	0.4	0.00011	-0.098	-0.28	DOWN
Cbx3	Cbx3	3e-05	169.7	206	0.521	0.6	0.0002	-0.08	-0.28	DOWN
Nek7	Nek7	4.2e-05	56.4	68	0.212	0.29	0.00027	-0.079	-0.28	DOWN
Akirin2	Akirin2	4.7e-05	41.8	51	0.173	0.25	0.0003	-0.077	-0.28	DOWN
Nip7	Nip7	4.7e-05	36.2	44	0.155	0.23	0.0003	-0.071	-0.28	DOWN
Borcs8	Borcs8	6e-05	44.4	54	0.174	0.25	0.00037	-0.077	-0.28	DOWN
Tomm40	Tomm40	6.3e-05	47.5	58	0.202	0.28	0.00039	-0.08	-0.28	DOWN
Frg1	Frg1	6.3e-05	67.9	82	0.266	0.36	0.00039	-0.093	-0.28	DOWN
Emc10	Emc10	7.4e-05	77.2	93	0.296	0.39	0.00045	-0.09	-0.28	DOWN
Gatad2a	Gatad2a	0.0002	78.9	96	0.3	0.38	0.0011	-0.085	-0.28	DOWN
Dcun1d5	Dcun1d5	0.0002	75.1	91	0.313	0.4	0.0011	-0.083	-0.28	DOWN
Adgre5	Adgre5	0.00027	125.1	152	0.403	0.49	0.0014	-0.083	-0.28	DOWN
Sdcbp	Sdcbp	0.00028	77.7	94	0.312	0.39	0.0015	-0.077	-0.28	DOWN
Samm50	Samm50	0.00029	49.8	60	0.224	0.3	0.0015	-0.08	-0.28	DOWN
Capn1	Capn1	0.00041	61.5	75	0.245	0.32	0.0021	-0.079	-0.28	DOWN
M6pr	M6pr	0.00043	63.7	77	0.262	0.33	0.0021	-0.071	-0.28	DOWN
Arhgef2	Arhgef2	0.00049	63	76	0.258	0.33	0.0024	-0.074	-0.28	DOWN
Tagln2	Tagln2	0.00069	302.3	367	0.676	0.72	0.0032	-0.048	-0.28	DOWN
Reps1	Reps1	0.0014	33.1	40	0.151	0.21	0.0059	-0.055	-0.28	DOWN
Ubl3	Ubl3	0.0026	59.4	72	0.241	0.3	0.01	-0.06	-0.28	DOWN
Inpp1	Inpp1	0.0027	49	59	0.209	0.27	0.011	-0.057	-0.28	DOWN
Ppp3cc	Ppp3cc	0.0033	41.8	51	0.184	0.24	0.013	-0.052	-0.28	DOWN
Vezf1	Vezf1	0.0034	62	75	0.258	0.32	0.013	-0.059	-0.28	DOWN
Pou2f2	Pou2f2	0.0044	84.8	103	0.243	0.3	0.016	-0.058	-0.28	DOWN
Xist	Xist	1.1e-10	917.6	1121	0.8	0.88	1.9e-09	-0.083	-0.29	DOWN
Fth1	Fth1	1.4e-09	720.2	881	0.917	0.95	2.1e-08	-0.031	-0.29	DOWN
Ly6e	Ly6e	8e-08	594.3	727	0.842	0.87	8.8e-07	-0.027	-0.29	DOWN
Spcs2	Spcs2	6.7e-07	154.6	188	0.501	0.6	6.2e-06	-0.1	-0.29	DOWN
Ptpn22	Ptpn22	1.9e-06	167.7	205	0.485	0.6	1.6e-05	-0.12	-0.29	DOWN
Set	Set	4.7e-06	346.8	424	0.726	0.77	3.6e-05	-0.042	-0.29	DOWN
D8Ertd738e	D8Ertd738e	4.8e-06	153.2	187	0.508	0.61	3.7e-05	-0.098	-0.29	DOWN
Mdh2	Mdh2	4.9e-06	139.8	171	0.474	0.56	3.8e-05	-0.091	-0.29	DOWN
Tmem50a	Tmem50a	8.5e-06	189.5	232	0.573	0.67	6.3e-05	-0.092	-0.29	DOWN
Abhd17a	Abhd17a	8.7e-06	68.5	84	0.275	0.38	6.5e-05	-0.1	-0.29	DOWN
Cd2bp2	Cd2bp2	1.9e-05	41.6	51	0.171	0.25	0.00013	-0.08	-0.29	DOWN
Higd2a	Higd2a	2e-05	80.2	98	0.316	0.42	0.00014	-0.1	-0.29	DOWN
Ptp4a2	Ptp4a2	2.9e-05	248.2	303	0.651	0.72	0.0002	-0.073	-0.29	DOWN
Isyna1	Isyna1	3.4e-05	33	40	0.143	0.21	0.00023	-0.072	-0.29	DOWN
Tmed9	Tmed9	3.8e-05	138	168	0.479	0.56	0.00025	-0.083	-0.29	DOWN
Dnajc2	Dnajc2	8.1e-05	85.6	104	0.317	0.41	0.00049	-0.09	-0.29	DOWN
Nifk	Nifk	9.1e-05	45.6	56	0.188	0.26	0.00054	-0.076	-0.29	DOWN
Tmem128	Tmem128	9.8e-05	44.1	54	0.194	0.27	0.00058	-0.076	-0.29	DOWN
Tab2	Tab2	0.00011	79.8	98	0.303	0.39	0.00063	-0.088	-0.29	DOWN
Def6	Def6	0.00013	67.5	82	0.266	0.35	0.00074	-0.084	-0.29	DOWN
Ppil3	Ppil3	0.00013	31.6	39	0.141	0.21	0.00075	-0.066	-0.29	DOWN
Tmem160	Tmem160	0.00013	106	129	0.387	0.48	0.00077	-0.091	-0.29	DOWN
Cebpg	Cebpg	0.00016	33.2	41	0.141	0.21	0.0009	-0.066	-0.29	DOWN
Gatad1	Gatad1	0.00016	36.2	44	0.153	0.22	0.00091	-0.066	-0.29	DOWN
Trappc6b	Trappc6b	0.00033	51.5	63	0.226	0.3	0.0017	-0.076	-0.29	DOWN
Copb2	Copb2	0.00038	57.4	70	0.244	0.32	0.0019	-0.074	-0.29	DOWN
Prmt5	Prmt5	0.00042	32.7	40	0.145	0.21	0.0021	-0.061	-0.29	DOWN
Dusp2	Dusp2	0.00044	112.9	138	0.339	0.42	0.0022	-0.083	-0.29	DOWN
Raf1	Raf1	0.00048	52.6	64	0.211	0.28	0.0024	-0.072	-0.29	DOWN
Trim30a	Trim30a	0.00055	96	117	0.338	0.41	0.0026	-0.073	-0.29	DOWN
Slc20a1	Slc20a1	0.00055	45.3	56	0.183	0.25	0.0027	-0.065	-0.29	DOWN
Arhgef3	Arhgef3	0.0017	58.4	71	0.234	0.3	0.007	-0.062	-0.29	DOWN
Rapgef1	Rapgef1	0.0032	46	56	0.2	0.25	0.012	-0.054	-0.29	DOWN
Clec2i	Clec2i	0.0035	54.4	66	0.214	0.27	0.013	-0.054	-0.29	DOWN
Baz2b	Baz2b	0.008	46.3	57	0.183	0.23	0.027	-0.047	-0.29	DOWN
Nr3c1	Nr3c1	0.0096	67.8	83	0.266	0.32	0.031	-0.057	-0.29	DOWN
Cox4i1	Cox4i1	7.5e-14	569.1	700	0.877	0.92	1.8e-12	-0.043	-0.3	DOWN
Atp5l	Atp5l	1.5e-11	370.6	456	0.783	0.84	2.8e-10	-0.059	-0.3	DOWN
Ssb	Ssb	5e-07	189.3	233	0.55	0.65	4.7e-06	-0.1	-0.3	DOWN
Cct5	Cct5	6.4e-07	166.9	206	0.521	0.62	5.9e-06	-0.1	-0.3	DOWN
Ddx39b	Ddx39b	1.3e-06	153.2	189	0.497	0.6	1.1e-05	-0.1	-0.3	DOWN
Tmem167	Tmem167	1.4e-06	104.5	128	0.381	0.49	1.2e-05	-0.11	-0.3	DOWN
Arpp19	Arpp19	3.2e-06	167.8	206	0.537	0.62	2.6e-05	-0.086	-0.3	DOWN
Trir	Trir	4.5e-06	159.7	196	0.521	0.62	3.5e-05	-0.095	-0.3	DOWN
Cript	Cript	4.9e-06	66.6	82	0.263	0.37	3.8e-05	-0.1	-0.3	DOWN
Cdv3	Cdv3	4.9e-06	92.4	113	0.335	0.44	3.8e-05	-0.11	-0.3	DOWN
Ngdn	Ngdn	5e-06	45.3	56	0.198	0.29	3.9e-05	-0.09	-0.3	DOWN
Dbnl	Dbnl	5.1e-06	88.9	110	0.339	0.44	3.9e-05	-0.1	-0.3	DOWN
Cbx1	Cbx1	5.4e-06	95.8	118	0.344	0.45	4.2e-05	-0.1	-0.3	DOWN
Ogfr	Ogfr	5.9e-06	44.1	54	0.181	0.27	4.5e-05	-0.089	-0.3	DOWN
Cyc1	Cyc1	6.7e-06	74.1	91	0.292	0.4	5e-05	-0.1	-0.3	DOWN
Lsm1	Lsm1	6.8e-06	41.9	52	0.182	0.27	5.2e-05	-0.088	-0.3	DOWN
Rheb	Rheb	7.1e-06	54.8	67	0.227	0.32	5.3e-05	-0.096	-0.3	DOWN
Rbm42	Rbm42	7.8e-06	66.5	82	0.277	0.38	5.8e-05	-0.1	-0.3	DOWN
Cdc34	Cdc34	8.5e-06	38.4	47	0.164	0.25	6.3e-05	-0.083	-0.3	DOWN
BC031181	BC031181	1.1e-05	61.5	75	0.247	0.34	8.3e-05	-0.095	-0.3	DOWN
Top1	Top1	2.9e-05	172.2	212	0.52	0.6	0.00019	-0.083	-0.3	DOWN
Nmi	Nmi	4.5e-05	70.1	86	0.266	0.36	0.00029	-0.093	-0.3	DOWN
Pitpnb	Pitpnb	0.00016	31.4	38	0.14	0.2	0.0009	-0.064	-0.3	DOWN
Tpst2	Tpst2	0.00016	99.9	123	0.37	0.45	0.0009	-0.082	-0.3	DOWN
Supt16	Supt16	0.00016	97.8	120	0.364	0.45	0.0009	-0.082	-0.3	DOWN
Nrf1	Nrf1	0.00018	35.6	44	0.153	0.22	0.001	-0.066	-0.3	DOWN
Tmem208	Tmem208	0.0002	54.7	67	0.227	0.31	0.0011	-0.079	-0.3	DOWN
Cblb	Cblb	0.00021	81.8	101	0.295	0.37	0.0011	-0.077	-0.3	DOWN
Fuca1	Fuca1	0.00021	36.8	45	0.165	0.23	0.0012	-0.067	-0.3	DOWN
Maea	Maea	0.00026	32.6	40	0.146	0.21	0.0014	-0.063	-0.3	DOWN
Rab5a	Rab5a	0.00035	35.9	44	0.154	0.22	0.0018	-0.063	-0.3	DOWN
Arhgap25	Arhgap25	0.00039	50.2	62	0.204	0.27	0.002	-0.068	-0.3	DOWN
Napa	Napa	0.00048	45.9	56	0.205	0.27	0.0023	-0.069	-0.3	DOWN
Ubp1	Ubp1	0.00077	40.5	50	0.176	0.24	0.0036	-0.06	-0.3	DOWN
Slc3a2	Slc3a2	0.00078	78.7	97	0.302	0.38	0.0036	-0.074	-0.3	DOWN
Selenos	Selenos	0.0019	69.8	86	0.28	0.34	0.0077	-0.064	-0.3	DOWN
Tuba1a	Tuba1a	0.011	65.8	81	0.271	0.32	0.035	-0.051	-0.3	DOWN
H3f3a	H3f3a	1.2e-14	714.1	887	0.918	0.93	3.1e-13	-0.016	-0.31	DOWN
Sec61g	Sec61g	6e-10	295.3	365	0.706	0.79	9.1e-09	-0.082	-0.31	DOWN
Tln1	Tln1	9.1e-10	269.5	334	0.663	0.74	1.4e-08	-0.078	-0.31	DOWN
Itm2b	Itm2b	3.2e-08	444.5	551	0.841	0.87	3.7e-07	-0.029	-0.31	DOWN
Capza1	Capza1	5.4e-08	130.7	162	0.426	0.55	6.1e-07	-0.12	-0.31	DOWN
Ndufb5	Ndufb5	1.5e-07	132.6	164	0.454	0.57	1.5e-06	-0.11	-0.31	DOWN
Clta	Clta	2.1e-07	223	277	0.624	0.72	2.1e-06	-0.093	-0.31	DOWN
Utp3	Utp3	1e-06	79.4	99	0.292	0.4	9.2e-06	-0.11	-0.31	DOWN
Fam111a	Fam111a	1.2e-06	71.1	88	0.246	0.35	1.1e-05	-0.1	-0.31	DOWN
Rtraf	Rtraf	2.1e-06	137.4	170	0.474	0.58	1.8e-05	-0.1	-0.31	DOWN
Polr2g	Polr2g	2.4e-06	59.5	74	0.245	0.35	2e-05	-0.1	-0.31	DOWN
Idh3g	Idh3g	2.7e-06	57.6	71	0.243	0.34	2.2e-05	-0.1	-0.31	DOWN
Ppil2	Ppil2	4e-06	62.5	77	0.251	0.35	3.2e-05	-0.1	-0.31	DOWN
Ndufs7	Ndufs7	7.6e-06	90.9	113	0.347	0.45	5.7e-05	-0.1	-0.31	DOWN
Eif1b	Eif1b	1.1e-05	72	89	0.286	0.39	8.2e-05	-0.1	-0.31	DOWN
Arf6	Arf6	1.1e-05	59.7	74	0.247	0.34	8.3e-05	-0.095	-0.31	DOWN
Cab39	Cab39	1.6e-05	78.7	98	0.303	0.4	0.00011	-0.093	-0.31	DOWN
Ufc1	Ufc1	2.8e-05	56.8	70	0.241	0.33	0.00019	-0.091	-0.31	DOWN
Ahsa1	Ahsa1	2.8e-05	56.4	70	0.235	0.32	0.00019	-0.086	-0.31	DOWN
Polr2e	Polr2e	2.9e-05	74.3	92	0.298	0.39	0.00019	-0.097	-0.31	DOWN
Ube2e1	Ube2e1	3.3e-05	42.5	53	0.185	0.26	0.00022	-0.08	-0.31	DOWN
Fam162a	Fam162a	3.4e-05	43.3	54	0.186	0.27	0.00022	-0.082	-0.31	DOWN
2210016F16Rik	2210016F16Rik	5.2e-05	41.2	51	0.174	0.25	0.00033	-0.074	-0.31	DOWN
Pdia4	Pdia4	6e-05	42.2	52	0.176	0.25	0.00037	-0.075	-0.31	DOWN
Dctn3	Dctn3	6e-05	80.5	100	0.327	0.41	0.00038	-0.086	-0.31	DOWN
Sra1	Sra1	6.4e-05	63.6	79	0.258	0.34	0.0004	-0.087	-0.31	DOWN
Glo1	Glo1	6.8e-05	42.3	52	0.193	0.27	0.00042	-0.076	-0.31	DOWN
Pebp1	Pebp1	7.1e-05	115.4	143	0.434	0.52	0.00043	-0.082	-0.31	DOWN
Coro7	Coro7	7.8e-05	32.5	40	0.143	0.21	0.00047	-0.069	-0.31	DOWN
Eif3j1	Eif3j1	0.00013	98.3	122	0.35	0.43	0.00077	-0.082	-0.31	DOWN
Vrk1	Vrk1	0.00015	32.8	41	0.151	0.22	0.00082	-0.067	-0.31	DOWN
Hcfc1	Hcfc1	0.00022	45.2	56	0.201	0.27	0.0012	-0.073	-0.31	DOWN
Ubald2	Ubald2	0.00039	66	82	0.263	0.33	0.002	-0.07	-0.31	DOWN
Stat4	Stat4	0.0005	111.7	139	0.405	0.47	0.0025	-0.069	-0.31	DOWN
Timm44	Timm44	0.00073	38.9	48	0.175	0.24	0.0034	-0.061	-0.31	DOWN
Rhof	Rhof	0.00081	49.4	61	0.215	0.28	0.0038	-0.064	-0.31	DOWN
Nhp2	Nhp2	0.0013	88.4	109	0.334	0.4	0.0056	-0.07	-0.31	DOWN
Ppia	Ppia	1.8e-19	1660	2078	0.984	0.99	8.3e-18	-0.005	-0.32	DOWN
Atp5e	Atp5e	1.3e-18	607.4	758	0.909	0.92	5.5e-17	-0.008	-0.32	DOWN
Cd52	Cd52	6.9e-18	2017.3	2512	0.981	0.98	2.6e-16	0.00044	-0.32	DOWN
Atp5c1	Atp5c1	1.9e-10	244.5	304	0.633	0.74	3.1e-09	-0.1	-0.32	DOWN
Cotl1	Cotl1	4.7e-10	317.2	396	0.708	0.78	7.3e-09	-0.071	-0.32	DOWN
Snrpd2	Snrpd2	1.5e-08	197.4	247	0.58	0.67	1.8e-07	-0.089	-0.32	DOWN
Dnajc8	Dnajc8	5.8e-08	132.6	165	0.443	0.56	6.5e-07	-0.12	-0.32	DOWN
Gdi2	Gdi2	1.1e-07	146.8	183	0.478	0.58	1.1e-06	-0.11	-0.32	DOWN
Ppm1g	Ppm1g	1.2e-07	84.9	106	0.323	0.44	1.2e-06	-0.12	-0.32	DOWN
Srsf2	Srsf2	4.1e-07	168.9	211	0.507	0.59	4e-06	-0.084	-0.32	DOWN
Dad1	Dad1	7.5e-07	211.6	264	0.606	0.7	6.8e-06	-0.09	-0.32	DOWN
Rala	Rala	2.2e-06	49	61	0.201	0.29	1.9e-05	-0.093	-0.32	DOWN
2310011J03Rik	2310011J03Rik	2.4e-06	37	46	0.15	0.24	2e-05	-0.085	-0.32	DOWN
Hadha	Hadha	3.1e-06	70	87	0.282	0.39	2.5e-05	-0.11	-0.32	DOWN
Trappc2l	Trappc2l	4e-06	41.1	51	0.17	0.26	3.2e-05	-0.087	-0.32	DOWN
Psenen	Psenen	4e-06	125.4	157	0.449	0.55	3.2e-05	-0.1	-0.32	DOWN
Psmd4	Psmd4	7.9e-06	118.2	147	0.415	0.52	5.9e-05	-0.11	-0.32	DOWN
Mrfap1	Mrfap1	1e-05	87.9	110	0.34	0.44	7.5e-05	-0.1	-0.32	DOWN
Rab10	Rab10	1.2e-05	83.6	104	0.324	0.43	8.6e-05	-0.1	-0.32	DOWN
Mrps33	Mrps33	1.2e-05	80.7	101	0.318	0.41	8.8e-05	-0.096	-0.32	DOWN
G3bp1	G3bp1	1.3e-05	135.6	169	0.465	0.55	9.5e-05	-0.084	-0.32	DOWN
Arl2bp	Arl2bp	1.5e-05	61.2	76	0.244	0.33	0.0001	-0.09	-0.32	DOWN
Lasp1	Lasp1	1.5e-05	57.8	72	0.232	0.32	0.00011	-0.086	-0.32	DOWN
Gtf3a	Gtf3a	1.8e-05	48.4	60	0.199	0.28	0.00013	-0.084	-0.32	DOWN
Canx	Canx	2e-05	104.5	130	0.376	0.47	0.00014	-0.091	-0.32	DOWN
Nt5c3b	Nt5c3b	2.8e-05	37.4	47	0.164	0.24	0.00019	-0.078	-0.32	DOWN
Uchl3	Uchl3	5.5e-05	46.2	58	0.202	0.28	0.00034	-0.081	-0.32	DOWN
Ubxn4	Ubxn4	6.8e-05	87.3	109	0.34	0.43	0.00042	-0.088	-0.32	DOWN
Surf4	Surf4	0.00012	43.4	54	0.189	0.26	0.00067	-0.075	-0.32	DOWN
Arap2	Arap2	0.00012	74.1	93	0.266	0.34	0.00068	-0.077	-0.32	DOWN
Wbp2	Wbp2	0.00015	40.1	50	0.171	0.24	0.00083	-0.068	-0.32	DOWN
Oxa1l	Oxa1l	0.0002	36.4	45	0.163	0.23	0.0011	-0.065	-0.32	DOWN
Mrps25	Mrps25	0.00024	31.5	39	0.141	0.2	0.0013	-0.063	-0.32	DOWN
Wdr61	Wdr61	0.00029	41.2	51	0.181	0.25	0.0015	-0.065	-0.32	DOWN
Cd5	Cd5	0.00095	89.9	112	0.307	0.38	0.0043	-0.07	-0.32	DOWN
Dguok	Dguok	0.0011	62.6	78	0.262	0.33	0.0048	-0.067	-0.32	DOWN
Mfng	Mfng	0.0011	40	50	0.173	0.23	0.0049	-0.058	-0.32	DOWN
Degs1	Degs1	0.0011	40	50	0.181	0.24	0.005	-0.06	-0.32	DOWN
Atp6v0e	Atp6v0e	3e-09	153.1	192	0.476	0.61	4.2e-08	-0.14	-0.33	DOWN
Rbx1	Rbx1	3.7e-09	207.8	261	0.616	0.7	5e-08	-0.087	-0.33	DOWN
Cox6a1	Cox6a1	6.7e-08	183.1	230	0.562	0.65	7.5e-07	-0.089	-0.33	DOWN
Mrpl57	Mrpl57	8.9e-08	90.6	114	0.322	0.44	9.7e-07	-0.12	-0.33	DOWN
Mrpl52	Mrpl52	9e-08	163.1	205	0.502	0.61	9.8e-07	-0.1	-0.33	DOWN
Ppp1cc	Ppp1cc	2.6e-07	126.7	159	0.436	0.54	2.6e-06	-0.1	-0.33	DOWN
Psmd6	Psmd6	3.4e-07	57.8	73	0.236	0.34	3.3e-06	-0.11	-0.33	DOWN
Psmb6	Psmb6	5.8e-07	111.6	140	0.408	0.52	5.4e-06	-0.11	-0.33	DOWN
Ola1	Ola1	1.1e-06	61.7	77	0.241	0.35	9.9e-06	-0.1	-0.33	DOWN
Immp1l	Immp1l	1.4e-06	35.3	44	0.15	0.24	1.2e-05	-0.086	-0.33	DOWN
Ndufv3	Ndufv3	1.6e-06	137	172	0.471	0.58	1.4e-05	-0.11	-0.33	DOWN
Rars	Rars	1.9e-06	44.1	56	0.183	0.28	1.6e-05	-0.092	-0.33	DOWN
Ccng1	Ccng1	2.8e-06	35.3	45	0.143	0.22	2.3e-05	-0.081	-0.33	DOWN
Tnfaip8	Tnfaip8	3e-06	100.7	126	0.354	0.46	2.4e-05	-0.1	-0.33	DOWN
Ndufs4	Ndufs4	3.5e-06	82.1	103	0.322	0.44	2.8e-05	-0.11	-0.33	DOWN
Tmem165	Tmem165	5.2e-06	34.7	44	0.145	0.22	4e-05	-0.079	-0.33	DOWN
Eif4h	Eif4h	6.8e-06	99.9	125	0.381	0.47	5.1e-05	-0.09	-0.33	DOWN
Riok3	Riok3	7.3e-06	41.9	53	0.175	0.26	5.4e-05	-0.085	-0.33	DOWN
Anapc11	Anapc11	1.6e-05	64.5	81	0.253	0.35	0.00011	-0.094	-0.33	DOWN
Tgfb1	Tgfb1	1.6e-05	78.4	98	0.29	0.38	0.00011	-0.092	-0.33	DOWN
Usp14	Usp14	3e-05	32	40	0.143	0.21	0.0002	-0.071	-0.33	DOWN
Cacybp	Cacybp	3.3e-05	77.9	98	0.312	0.41	0.00022	-0.096	-0.33	DOWN
Psph	Psph	3.4e-05	33.3	42	0.157	0.23	0.00022	-0.074	-0.33	DOWN
Dctn4	Dctn4	0.00052	48.3	61	0.202	0.27	0.0025	-0.069	-0.33	DOWN
Atp5a1	Atp5a1	5.6e-12	252.1	319	0.662	0.75	1.1e-10	-0.085	-0.34	DOWN
Hnrnpk	Hnrnpk	5.9e-11	280.1	355	0.682	0.77	1e-09	-0.092	-0.34	DOWN
Swi5	Swi5	7.1e-09	110.3	140	0.392	0.52	9.2e-08	-0.13	-0.34	DOWN
Fam103a1	Fam103a1	2.1e-08	63.1	80	0.241	0.36	2.5e-07	-0.12	-0.34	DOWN
Gmfg	Gmfg	2.2e-08	319.1	403	0.71	0.79	2.7e-07	-0.078	-0.34	DOWN
Ssu72	Ssu72	3.2e-08	91.5	116	0.335	0.46	3.7e-07	-0.13	-0.34	DOWN
Atp5o.1	Atp5o.1	3.9e-08	163.8	207	0.534	0.62	4.5e-07	-0.087	-0.34	DOWN
Psmb10	Psmb10	4.3e-08	156	198	0.476	0.6	4.9e-07	-0.12	-0.34	DOWN
Csk	Csk	7e-08	139.4	176	0.462	0.58	7.8e-07	-0.12	-0.34	DOWN
Babam1	Babam1	8.3e-08	40.7	52	0.162	0.26	9.1e-07	-0.1	-0.34	DOWN
Atp5k	Atp5k	2.5e-07	219	276	0.594	0.67	2.5e-06	-0.075	-0.34	DOWN
Psmb9	Psmb9	4.2e-07	177	224	0.527	0.62	4e-06	-0.09	-0.34	DOWN
Timm13	Timm13	1.4e-06	119	151	0.429	0.53	1.2e-05	-0.1	-0.34	DOWN
Ndufs5	Ndufs5	1.7e-06	89.5	114	0.343	0.45	1.4e-05	-0.11	-0.34	DOWN
Rbbp4	Rbbp4	1.7e-06	106.3	134	0.378	0.48	1.5e-05	-0.1	-0.34	DOWN
Bzw1	Bzw1	1.7e-06	140.5	178	0.46	0.56	1.5e-05	-0.099	-0.34	DOWN
Polr2a	Polr2a	3.1e-06	82.8	105	0.312	0.42	2.5e-05	-0.1	-0.34	DOWN
Srp19	Srp19	3.6e-06	79.3	101	0.309	0.41	2.9e-05	-0.1	-0.34	DOWN
Grpel1	Grpel1	3.9e-06	54.8	69	0.23	0.33	3.1e-05	-0.097	-0.34	DOWN
Was	Was	5.5e-06	65	82	0.26	0.36	4.2e-05	-0.1	-0.34	DOWN
Lsm12	Lsm12	6.9e-06	63.5	81	0.254	0.35	5.2e-05	-0.097	-0.34	DOWN
Bin1	Bin1	9.1e-06	65.6	83	0.266	0.36	6.7e-05	-0.093	-0.34	DOWN
Elavl1	Elavl1	1.5e-05	58.5	74	0.25	0.34	0.00011	-0.091	-0.34	DOWN
Ppp4c	Ppp4c	2e-05	81.4	103	0.332	0.42	0.00014	-0.093	-0.34	DOWN
Ivns1abp	Ivns1abp	2.4e-05	46.2	58	0.198	0.28	0.00016	-0.082	-0.34	DOWN
Golga7	Golga7	3.1e-05	34.4	44	0.152	0.22	0.00021	-0.072	-0.34	DOWN
Idh3b	Idh3b	3.5e-05	53.3	68	0.233	0.32	0.00023	-0.086	-0.34	DOWN
Exosc8	Exosc8	4.3e-05	62.8	79	0.262	0.35	0.00027	-0.084	-0.34	DOWN
Mrps23	Mrps23	4.9e-05	52.7	67	0.23	0.32	0.00031	-0.086	-0.34	DOWN
Stt3a	Stt3a	5.3e-05	32.6	41	0.149	0.22	0.00033	-0.071	-0.34	DOWN
Psme3	Psme3	8.1e-05	42.5	54	0.187	0.26	0.00048	-0.074	-0.34	DOWN
Necap2	Necap2	0.00011	29.6	37	0.137	0.2	0.00065	-0.063	-0.34	DOWN
Stap1	Stap1	0.00014	67	85	0.254	0.33	0.0008	-0.08	-0.34	DOWN
Sema4a	Sema4a	0.00094	59.7	76	0.248	0.31	0.0042	-0.064	-0.34	DOWN
Runx1	Runx1	0.0017	48.6	61	0.203	0.26	0.0071	-0.056	-0.34	DOWN
Ms4a4b	Ms4a4b	1e-13	1150.9	1464	0.959	0.96	2.4e-12	-0.0037	-0.35	DOWN
Polr1d	Polr1d	4.1e-10	169.4	216	0.511	0.63	6.4e-09	-0.12	-0.35	DOWN
Ywhab	Ywhab	4.6e-09	166.6	212	0.524	0.63	6.2e-08	-0.11	-0.35	DOWN
Psma3	Psma3	2e-08	168.5	215	0.524	0.64	2.4e-07	-0.11	-0.35	DOWN
Atp6v1f	Atp6v1f	2.4e-08	172.1	220	0.547	0.66	2.8e-07	-0.11	-0.35	DOWN
Prkar1a	Prkar1a	4.8e-08	146.1	186	0.481	0.6	5.4e-07	-0.12	-0.35	DOWN
Rab11b	Rab11b	6.4e-08	78	99	0.305	0.43	7.1e-07	-0.12	-0.35	DOWN
Puf60	Puf60	2.4e-07	89.8	115	0.338	0.45	2.4e-06	-0.11	-0.35	DOWN
Glrx3	Glrx3	3.8e-07	74.4	95	0.288	0.4	3.7e-06	-0.11	-0.35	DOWN
Psmc2	Psmc2	4e-07	56.1	72	0.237	0.34	3.9e-06	-0.11	-0.35	DOWN
Mrps12	Mrps12	1e-06	44.1	56	0.187	0.28	9.2e-06	-0.096	-0.35	DOWN
Pigt	Pigt	1.3e-06	33.7	43	0.142	0.23	1.1e-05	-0.084	-0.35	DOWN
Armc1	Armc1	2.3e-06	30.3	39	0.134	0.21	1.9e-05	-0.079	-0.35	DOWN
Mrps16	Mrps16	2.3e-06	116	148	0.417	0.52	1.9e-05	-0.1	-0.35	DOWN
Naa38	Naa38	3.3e-06	51.6	66	0.213	0.31	2.6e-05	-0.095	-0.35	DOWN
Ufd1	Ufd1	3.4e-06	30.1	38	0.125	0.2	2.7e-05	-0.076	-0.35	DOWN
Rbbp7	Rbbp7	3.5e-06	83.4	107	0.312	0.4	2.8e-05	-0.093	-0.35	DOWN
Akr1a1	Akr1a1	4.2e-06	88.9	113	0.348	0.45	3.3e-05	-0.1	-0.35	DOWN
Letm1	Letm1	4.7e-06	42	53	0.177	0.26	3.7e-05	-0.085	-0.35	DOWN
Gimap9	Gimap9	5.5e-06	110.3	140	0.39	0.49	4.2e-05	-0.097	-0.35	DOWN
Manf	Manf	1.1e-05	83.6	106	0.322	0.41	8.2e-05	-0.092	-0.35	DOWN
Mgat2	Mgat2	2.2e-05	41	52	0.181	0.26	0.00015	-0.079	-0.35	DOWN
Psmc1	Psmc1	4e-05	51.7	66	0.226	0.31	0.00026	-0.083	-0.35	DOWN
Emc7	Emc7	0.00011	50.5	64	0.218	0.29	0.00066	-0.077	-0.35	DOWN
Gstp3	Gstp3	0.00021	38.2	49	0.162	0.23	0.0011	-0.064	-0.35	DOWN
Fcho2	Fcho2	0.00022	41.8	53	0.175	0.24	0.0012	-0.064	-0.35	DOWN
Dpysl2	Dpysl2	0.00026	37.5	48	0.163	0.23	0.0014	-0.063	-0.35	DOWN
Rasa3	Rasa3	0.00068	98.1	125	0.352	0.42	0.0032	-0.071	-0.35	DOWN
Chchd2	Chchd2	8.4e-17	392.1	503	0.806	0.86	2.8e-15	-0.057	-0.36	DOWN
Laptm5	Laptm5	9.7e-15	568.7	730	0.882	0.93	2.6e-13	-0.053	-0.36	DOWN
Atp5b	Atp5b	7.1e-13	344.7	443	0.754	0.81	1.5e-11	-0.057	-0.36	DOWN
H2-Q7	H2-Q7	8.1e-11	791.9	1016	0.933	0.95	1.4e-09	-0.02	-0.36	DOWN
Maz	Maz	1.7e-08	70.8	91	0.257	0.38	2.1e-07	-0.12	-0.36	DOWN
Bin2	Bin2	2.1e-08	184.6	237	0.553	0.66	2.5e-07	-0.11	-0.36	DOWN
Fis1	Fis1	5e-08	137	176	0.469	0.59	5.7e-07	-0.12	-0.36	DOWN
Metap2	Metap2	6.7e-08	118.3	151	0.41	0.52	7.4e-07	-0.11	-0.36	DOWN
Pdcd5	Pdcd5	8.4e-08	98.3	126	0.365	0.49	9.1e-07	-0.12	-0.36	DOWN
Ppp2ca	Ppp2ca	9e-08	123.6	159	0.432	0.55	9.8e-07	-0.12	-0.36	DOWN
Psma5	Psma5	2e-07	80.4	103	0.325	0.43	2.1e-06	-0.11	-0.36	DOWN
Larp7	Larp7	2.6e-07	54	69	0.205	0.31	2.6e-06	-0.1	-0.36	DOWN
Trappc4	Trappc4	8.8e-07	52.2	67	0.21	0.31	8e-06	-0.098	-0.36	DOWN
Cuta	Cuta	9.1e-07	70.2	90	0.283	0.38	8.2e-06	-0.1	-0.36	DOWN
Mrps24	Mrps24	1.2e-06	101.5	130	0.379	0.49	1e-05	-0.11	-0.36	DOWN
Cops6	Cops6	1.3e-06	62	80	0.257	0.36	1.1e-05	-0.11	-0.36	DOWN
Ptk2b	Ptk2b	2.5e-06	74.1	95	0.279	0.38	2.1e-05	-0.1	-0.36	DOWN
Calr	Calr	2.7e-06	253	326	0.63	0.68	2.2e-05	-0.053	-0.36	DOWN
Ergic2	Ergic2	9.7e-06	32.2	41	0.137	0.21	7.1e-05	-0.075	-0.36	DOWN
Slc1a5	Slc1a5	1e-05	60	77	0.238	0.33	7.4e-05	-0.089	-0.36	DOWN
March2	March2	1.1e-05	50.3	65	0.198	0.28	7.7e-05	-0.085	-0.36	DOWN
Commd7	Commd7	1.8e-05	48.9	63	0.213	0.3	0.00013	-0.088	-0.36	DOWN
Bnip2	Bnip2	2.6e-05	49.4	63	0.214	0.3	0.00017	-0.082	-0.36	DOWN
Bbip1	Bbip1	3.1e-05	37.5	48	0.163	0.24	0.00021	-0.073	-0.36	DOWN
Sdhaf2	Sdhaf2	6.8e-05	30.8	40	0.141	0.21	0.00042	-0.066	-0.36	DOWN
Smndc1	Smndc1	0.00011	43.8	56	0.179	0.25	0.00066	-0.069	-0.36	DOWN
Adamts10	Adamts10	0.00014	38.6	50	0.161	0.23	0.00081	-0.067	-0.36	DOWN
Ruvbl1	Ruvbl1	0.00016	32.9	42	0.144	0.21	0.00092	-0.064	-0.36	DOWN
Il10rb	Il10rb	0.0002	50.8	65	0.214	0.29	0.0011	-0.075	-0.36	DOWN
Naa35	Naa35	0.00023	31.2	40	0.139	0.2	0.0013	-0.061	-0.36	DOWN
Plekha2	Plekha2	0.00033	45.3	58	0.198	0.27	0.0017	-0.068	-0.36	DOWN
Zfp622	Zfp622	0.0007	50.8	65	0.221	0.29	0.0033	-0.07	-0.36	DOWN
Glrx2	Glrx2	0.0011	39.7	51	0.183	0.24	0.0047	-0.058	-0.36	DOWN
Egln1	Egln1	0.0021	37.4	48	0.175	0.23	0.0083	-0.054	-0.36	DOWN
Pik3r5	Pik3r5	0.0024	38	49	0.159	0.21	0.0096	-0.049	-0.36	DOWN
H2-D1	H2-D1	5.2e-25	1351.1	1745	0.972	0.99	3.5e-23	-0.018	-0.37	DOWN
Psmb8	Psmb8	2.4e-14	470	606	0.819	0.87	6.1e-13	-0.054	-0.37	DOWN
Fkbp8	Fkbp8	2.4e-10	98.6	128	0.352	0.5	3.9e-09	-0.14	-0.37	DOWN
Mdh1	Mdh1	5.5e-10	127.9	166	0.434	0.56	8.4e-09	-0.13	-0.37	DOWN
Tmbim6	Tmbim6	2.3e-09	179	231	0.54	0.67	3.3e-08	-0.13	-0.37	DOWN
Banf1	Banf1	1.3e-08	109.4	142	0.374	0.49	1.6e-07	-0.12	-0.37	DOWN
Ndufa1	Ndufa1	2e-08	124.9	161	0.456	0.57	2.4e-07	-0.11	-0.37	DOWN
Polr2f	Polr2f	4.2e-08	78.1	101	0.301	0.42	4.8e-07	-0.12	-0.37	DOWN
Eno1	Eno1	7e-08	131.6	170	0.446	0.55	7.8e-07	-0.11	-0.37	DOWN
March5	March5	1.4e-07	40.6	53	0.165	0.26	1.5e-06	-0.098	-0.37	DOWN
Mien1	Mien1	2.3e-07	83.7	108	0.317	0.43	2.3e-06	-0.11	-0.37	DOWN
Ndufa8	Ndufa8	4.6e-07	82.4	106	0.33	0.44	4.4e-06	-0.11	-0.37	DOWN
Commd3	Commd3	4.9e-07	49.8	65	0.205	0.31	4.6e-06	-0.1	-0.37	DOWN
Gtf3c6	Gtf3c6	6.4e-07	35.5	46	0.149	0.24	5.9e-06	-0.087	-0.37	DOWN
H2-Q6	H2-Q6	6.9e-07	207.5	268	0.566	0.66	6.4e-06	-0.093	-0.37	DOWN
Wdr83os	Wdr83os	9.3e-07	68.2	88	0.266	0.37	8.3e-06	-0.11	-0.37	DOWN
Eif1ax	Eif1ax	1.3e-06	69.8	90	0.273	0.37	1.2e-05	-0.1	-0.37	DOWN
Fmnl1	Fmnl1	1.6e-06	70.8	92	0.275	0.38	1.4e-05	-0.1	-0.37	DOWN
Mrpl43	Mrpl43	3.6e-06	54.5	71	0.238	0.33	2.9e-05	-0.093	-0.37	DOWN
Psmd8	Psmd8	4.1e-06	91.3	118	0.354	0.45	3.3e-05	-0.093	-0.37	DOWN
Commd4	Commd4	8.4e-06	48.1	62	0.209	0.3	6.2e-05	-0.091	-0.37	DOWN
Smu1	Smu1	1e-05	43.4	56	0.195	0.28	7.3e-05	-0.086	-0.37	DOWN
Prkca	Prkca	2.4e-05	39.4	51	0.168	0.24	0.00016	-0.073	-0.37	DOWN
Tbl1xr1	Tbl1xr1	2.9e-05	48.3	62	0.203	0.29	0.00019	-0.082	-0.37	DOWN
Acp1	Acp1	3.2e-05	44.7	58	0.199	0.28	0.00021	-0.078	-0.37	DOWN
Atf4	Atf4	3.2e-05	75.6	97	0.3	0.39	0.00021	-0.089	-0.37	DOWN
Lfng	Lfng	3.6e-05	74.5	97	0.288	0.37	0.00024	-0.082	-0.37	DOWN
Spcs3	Spcs3	3.7e-05	32.6	42	0.14	0.21	0.00024	-0.067	-0.37	DOWN
Tle3	Tle3	0.0001	61.2	79	0.243	0.32	0.0006	-0.076	-0.37	DOWN
Cpsf3	Cpsf3	0.0026	32.8	42	0.154	0.2	0.01	-0.05	-0.37	DOWN
Snrpe	Snrpe	4.8e-14	296.4	387	0.72	0.79	1.2e-12	-0.066	-0.38	DOWN
Rac1	Rac1	4.3e-09	148	192	0.496	0.61	5.8e-08	-0.11	-0.38	DOWN
Psmb4	Psmb4	7.6e-09	136.4	178	0.464	0.58	9.7e-08	-0.12	-0.38	DOWN
Srsf3	Srsf3	1.1e-08	261.1	339	0.682	0.73	1.4e-07	-0.049	-0.38	DOWN
Arf5	Arf5	1.3e-08	221.8	289	0.623	0.71	1.6e-07	-0.092	-0.38	DOWN
Fam53b	Fam53b	2.3e-08	78.9	103	0.274	0.39	2.8e-07	-0.12	-0.38	DOWN
Sin3b	Sin3b	2.5e-08	85.2	111	0.329	0.45	3e-07	-0.12	-0.38	DOWN
Akna	Akna	3.1e-08	98.5	128	0.347	0.47	3.7e-07	-0.12	-0.38	DOWN
Mrpl20	Mrpl20	5.3e-08	68.7	90	0.274	0.39	6e-07	-0.11	-0.38	DOWN
Tomm22	Tomm22	1.9e-07	117.9	154	0.43	0.54	1.9e-06	-0.11	-0.38	DOWN
Pa2g4	Pa2g4	1.9e-07	93.9	122	0.337	0.45	2e-06	-0.11	-0.38	DOWN
Rex1bd	Rex1bd	2.8e-07	57.6	75	0.237	0.34	2.8e-06	-0.1	-0.38	DOWN
Rer1	Rer1	3.4e-07	89.5	117	0.35	0.46	3.3e-06	-0.11	-0.38	DOWN
Cwc15	Cwc15	3.6e-07	101.3	132	0.385	0.5	3.5e-06	-0.11	-0.38	DOWN
Trappc5	Trappc5	4.8e-07	34	44	0.148	0.24	4.5e-06	-0.087	-0.38	DOWN
Ssna1	Ssna1	6.6e-07	49.3	64	0.202	0.3	6.1e-06	-0.1	-0.38	DOWN
Fkbp1a	Fkbp1a	6.9e-07	105.5	138	0.385	0.49	6.4e-06	-0.1	-0.38	DOWN
Eny2	Eny2	1.8e-06	68.6	89	0.276	0.38	1.5e-05	-0.1	-0.38	DOWN
Cbfb	Cbfb	4.1e-06	45.5	59	0.192	0.28	3.2e-05	-0.089	-0.38	DOWN
Pcmt1	Pcmt1	6.4e-06	53.3	69	0.219	0.31	4.8e-05	-0.091	-0.38	DOWN
Drg1	Drg1	7.1e-06	33.6	44	0.155	0.23	5.3e-05	-0.08	-0.38	DOWN
Mknk2	Mknk2	1.1e-05	89.3	116	0.346	0.44	7.8e-05	-0.097	-0.38	DOWN
Cep250	Cep250	2.4e-05	47.7	62	0.195	0.27	0.00016	-0.078	-0.38	DOWN
Hspd1	Hspd1	3.6e-05	135.1	175	0.426	0.5	0.00023	-0.078	-0.38	DOWN
Hsd11b1	Hsd11b1	0.00031	72.3	94	0.278	0.35	0.0016	-0.074	-0.38	DOWN
Terf1	Terf1	0.00063	34	44	0.149	0.2	0.003	-0.055	-0.38	DOWN
Atp5h	Atp5h	2.9e-19	493.9	645	0.849	0.9	1.3e-17	-0.056	-0.39	DOWN
Tma7	Tma7	7.4e-16	308	404	0.738	0.82	2.3e-14	-0.08	-0.39	DOWN
Sept7	Sept7	7.5e-12	193.8	253	0.542	0.66	1.4e-10	-0.12	-0.39	DOWN
Hnrnpd	Hnrnpd	8.1e-10	161.8	211	0.505	0.61	1.2e-08	-0.11	-0.39	DOWN
Dynll1	Dynll1	2.7e-09	232.7	304	0.613	0.71	3.8e-08	-0.095	-0.39	DOWN
Ostc	Ostc	1.7e-08	82.9	109	0.321	0.44	2.1e-07	-0.12	-0.39	DOWN
Psmc5	Psmc5	1.7e-08	64	84	0.265	0.38	2.1e-07	-0.12	-0.39	DOWN
Rab5c	Rab5c	2.4e-08	71	93	0.276	0.4	2.8e-07	-0.12	-0.39	DOWN
Tomm5	Tomm5	3.6e-08	82	107	0.312	0.43	4.1e-07	-0.12	-0.39	DOWN
Polr2k	Polr2k	4.1e-08	53.3	70	0.216	0.33	4.7e-07	-0.11	-0.39	DOWN
Plekhj1	Plekhj1	9.1e-08	85.3	112	0.327	0.45	9.9e-07	-0.12	-0.39	DOWN
Uqcrb	Uqcrb	1e-07	133	174	0.463	0.57	1.1e-06	-0.1	-0.39	DOWN
Brk1	Brk1	1.8e-07	115	150	0.418	0.54	1.9e-06	-0.12	-0.39	DOWN
Rbm8a	Rbm8a	1.9e-07	92.3	120	0.358	0.47	2e-06	-0.11	-0.39	DOWN
Rap1b	Rap1b	2.2e-07	213.1	280	0.602	0.69	2.2e-06	-0.092	-0.39	DOWN
Zfp36l2	Zfp36l2	2.5e-07	284.1	371	0.623	0.73	2.5e-06	-0.11	-0.39	DOWN
Cdkn2aipnl	Cdkn2aipnl	3.1e-07	36.1	47	0.152	0.24	3e-06	-0.09	-0.39	DOWN
1700020I14Rik	1700020I14Rik	4e-07	79	103	0.29	0.4	3.9e-06	-0.11	-0.39	DOWN
Snrpa1	Snrpa1	4.3e-07	54.9	72	0.222	0.32	4.1e-06	-0.1	-0.39	DOWN
Yipf1	Yipf1	6.5e-07	37.3	49	0.159	0.25	6e-06	-0.09	-0.39	DOWN
Mrpl42	Mrpl42	1.5e-06	62.7	82	0.264	0.37	1.3e-05	-0.11	-0.39	DOWN
Ssrp1	Ssrp1	2e-06	107.8	141	0.39	0.48	1.7e-05	-0.088	-0.39	DOWN
Nap1l1	Nap1l1	2e-06	170.6	223	0.505	0.57	1.7e-05	-0.068	-0.39	DOWN
Mrpl54	Mrpl54	2.4e-06	61.2	80	0.246	0.34	2e-05	-0.095	-0.39	DOWN
Aup1	Aup1	3.3e-06	67.1	88	0.282	0.38	2.7e-05	-0.096	-0.39	DOWN
Mtch2	Mtch2	3.9e-06	46.3	61	0.2	0.29	3.1e-05	-0.09	-0.39	DOWN
Erg28	Erg28	4e-06	35.1	46	0.156	0.24	3.2e-05	-0.084	-0.39	DOWN
D16Ertd472e	D16Ertd472e	6.8e-06	58.1	76	0.234	0.32	5.1e-05	-0.09	-0.39	DOWN
Nfyb	Nfyb	8.6e-06	48	63	0.195	0.28	6.4e-05	-0.085	-0.39	DOWN
Eloa	Eloa	1.4e-05	34.1	45	0.15	0.22	0.0001	-0.072	-0.39	DOWN
Smim7	Smim7	1.7e-05	28.1	37	0.132	0.2	0.00012	-0.071	-0.39	DOWN
Hint3	Hint3	2e-05	31.9	42	0.133	0.2	0.00014	-0.07	-0.39	DOWN
Dcaf13	Dcaf13	2e-05	36.8	48	0.165	0.24	0.00014	-0.077	-0.39	DOWN
Polr2h	Polr2h	2.9e-05	30.6	40	0.142	0.21	0.0002	-0.069	-0.39	DOWN
Scamp2	Scamp2	0.0007	32.1	42	0.149	0.21	0.0033	-0.058	-0.39	DOWN
Serf2	Serf2	2.8e-30	684.3	905	0.911	0.95	2.8e-28	-0.039	-0.4	DOWN
Ppib	Ppib	5.3e-13	248.4	328	0.668	0.74	1.2e-11	-0.076	-0.4	DOWN
Cox7b	Cox7b	2.8e-12	220.3	290	0.605	0.71	5.6e-11	-0.11	-0.4	DOWN
Psma7	Psma7	1.4e-11	260.3	343	0.674	0.76	2.6e-10	-0.083	-0.4	DOWN
Cd2	Cd2	4.8e-11	260.4	345	0.664	0.76	8.5e-10	-0.094	-0.4	DOWN
Mrpl33	Mrpl33	8.5e-10	156.4	206	0.494	0.61	1.3e-08	-0.12	-0.4	DOWN
Ilk	Ilk	1.5e-08	50.6	67	0.2	0.31	1.9e-07	-0.11	-0.4	DOWN
Hcls1	Hcls1	2.1e-08	91	120	0.345	0.46	2.6e-07	-0.12	-0.4	DOWN
Sf3b6	Sf3b6	5.3e-08	129.4	171	0.471	0.57	6e-07	-0.1	-0.4	DOWN
Ier3ip1	Ier3ip1	5.9e-08	81.8	108	0.312	0.43	6.6e-07	-0.12	-0.4	DOWN
Nudt21	Nudt21	9.5e-08	76.4	101	0.308	0.42	1e-06	-0.11	-0.4	DOWN
Btg2	Btg2	2e-07	168.9	222	0.464	0.58	2e-06	-0.12	-0.4	DOWN
Polr2l	Polr2l	2.2e-07	34.9	46	0.157	0.25	2.2e-06	-0.094	-0.4	DOWN
Sdhd	Sdhd	3.3e-07	39.6	52	0.177	0.27	3.2e-06	-0.095	-0.4	DOWN
Rnf7	Rnf7	3.7e-07	52.5	69	0.224	0.33	3.5e-06	-0.1	-0.4	DOWN
Hdgf	Hdgf	8.3e-07	108	143	0.371	0.47	7.5e-06	-0.097	-0.4	DOWN
Timm17a	Timm17a	9.6e-07	42	56	0.184	0.28	8.6e-06	-0.094	-0.4	DOWN
Agpat3	Agpat3	9.8e-07	67.9	90	0.267	0.37	8.8e-06	-0.1	-0.4	DOWN
Cib1	Cib1	2.4e-06	47.3	62	0.204	0.29	2e-05	-0.09	-0.4	DOWN
Ptpn2	Ptpn2	3.1e-06	38	50	0.156	0.24	2.5e-05	-0.082	-0.4	DOWN
Cops3	Cops3	5.1e-06	32.7	43	0.145	0.23	3.9e-05	-0.08	-0.4	DOWN
Anxa5	Anxa5	1.5e-05	42.9	57	0.173	0.25	0.00011	-0.075	-0.4	DOWN
Ctdsp1	Ctdsp1	2e-05	37.2	49	0.157	0.23	0.00014	-0.073	-0.4	DOWN
Prkcsh	Prkcsh	2.2e-05	43	57	0.189	0.27	0.00015	-0.078	-0.4	DOWN
Bri3	Bri3	2.4e-05	52.7	69	0.225	0.31	0.00016	-0.084	-0.4	DOWN
Ywhag	Ywhag	0.00013	30.4	40	0.143	0.21	0.00072	-0.062	-0.4	DOWN
Actr3	Actr3	4.4e-19	428.9	568	0.813	0.88	1.9e-17	-0.065	-0.41	DOWN
Ndufa13	Ndufa13	6.4e-15	266.9	356	0.687	0.78	1.8e-13	-0.091	-0.41	DOWN
Myl12a	Myl12a	1.2e-12	250	332	0.639	0.74	2.5e-11	-0.1	-0.41	DOWN
Ndufb11	Ndufb11	3.8e-11	167.3	222	0.527	0.64	6.7e-10	-0.12	-0.41	DOWN
Ndufb3	Ndufb3	2.1e-10	99.9	132	0.367	0.51	3.3e-09	-0.14	-0.41	DOWN
Arf1	Arf1	2.6e-09	126	167	0.446	0.56	3.6e-08	-0.12	-0.41	DOWN
Selenof	Selenof	6.2e-09	91.3	122	0.356	0.48	8.1e-08	-0.13	-0.41	DOWN
Zmat2	Zmat2	1.3e-08	63.6	85	0.268	0.39	1.6e-07	-0.12	-0.41	DOWN
Cyb5b	Cyb5b	2.9e-08	35.8	47	0.151	0.25	3.5e-07	-0.1	-0.41	DOWN
Map1lc3b	Map1lc3b	3.3e-08	136.6	181	0.455	0.57	3.8e-07	-0.12	-0.41	DOWN
Snu13	Snu13	7.6e-08	119.1	158	0.429	0.53	8.4e-07	-0.11	-0.41	DOWN
Sf3b5	Sf3b5	8e-08	98.4	131	0.379	0.49	8.7e-07	-0.11	-0.41	DOWN
Dnajc1	Dnajc1	1.2e-07	73.4	98	0.275	0.39	1.3e-06	-0.11	-0.41	DOWN
Sf3a2	Sf3a2	1.8e-07	35.9	48	0.157	0.25	1.8e-06	-0.095	-0.41	DOWN
Fnbp1	Fnbp1	1.8e-07	123	163	0.435	0.54	1.9e-06	-0.1	-0.41	DOWN
Arf4	Arf4	1.9e-07	74.3	99	0.291	0.4	2e-06	-0.11	-0.41	DOWN
Anapc13	Anapc13	4e-07	53.9	72	0.22	0.32	3.9e-06	-0.1	-0.41	DOWN
Aip	Aip	4.2e-07	56.7	75	0.237	0.34	4e-06	-0.11	-0.41	DOWN
Clptm1l	Clptm1l	6.7e-07	43.4	58	0.18	0.27	6.2e-06	-0.093	-0.41	DOWN
Pgp	Pgp	8.3e-07	33.5	44	0.139	0.22	7.6e-06	-0.085	-0.41	DOWN
Sap30l	Sap30l	1e-06	38.2	51	0.167	0.26	9.2e-06	-0.088	-0.41	DOWN
Otub1	Otub1	1.4e-06	32.3	43	0.144	0.23	1.2e-05	-0.084	-0.41	DOWN
Dpy30	Dpy30	1.5e-06	42.4	56	0.185	0.27	1.3e-05	-0.09	-0.41	DOWN
Zfand5	Zfand5	1.8e-06	53.4	71	0.213	0.3	1.5e-05	-0.092	-0.41	DOWN
Anxa11	Anxa11	2e-06	27.7	37	0.124	0.2	1.7e-05	-0.077	-0.41	DOWN
Cnpy2	Cnpy2	4.7e-06	27.7	37	0.128	0.2	3.6e-05	-0.074	-0.41	DOWN
Rhog	Rhog	2.5e-05	73.9	98	0.321	0.41	0.00017	-0.084	-0.41	DOWN
Cox6c	Cox6c	1.3e-20	382	510	0.788	0.84	6.3e-19	-0.055	-0.42	DOWN
Slc25a5	Slc25a5	6.6e-15	298.4	398	0.695	0.78	1.8e-13	-0.081	-0.42	DOWN
Ubc	Ubc	3e-12	260.5	349	0.665	0.76	6e-11	-0.099	-0.42	DOWN
Nedd8	Nedd8	2.9e-11	176.8	236	0.554	0.67	5.2e-10	-0.12	-0.42	DOWN
Ostf1	Ostf1	4.7e-11	164.9	221	0.511	0.64	8.3e-10	-0.13	-0.42	DOWN
Ube2i	Ube2i	1.3e-10	168.1	225	0.538	0.66	2.2e-09	-0.12	-0.42	DOWN
Vcp	Vcp	1.1e-09	127.8	171	0.443	0.56	1.6e-08	-0.12	-0.42	DOWN
Slc9a3r1	Slc9a3r1	8.1e-08	94.9	127	0.353	0.47	8.8e-07	-0.12	-0.42	DOWN
Grb2	Grb2	1.1e-07	99.5	133	0.37	0.49	1.2e-06	-0.12	-0.42	DOWN
Mrps36	Mrps36	1.7e-07	56.9	76	0.245	0.35	1.7e-06	-0.1	-0.42	DOWN
Gtf2h5	Gtf2h5	2.1e-07	70.1	94	0.28	0.39	2.1e-06	-0.11	-0.42	DOWN
Srsf9	Srsf9	2.2e-07	38.5	51	0.172	0.26	2.2e-06	-0.091	-0.42	DOWN
Ino80e	Ino80e	5.6e-07	35.7	48	0.155	0.24	5.2e-06	-0.09	-0.42	DOWN
Fcho1	Fcho1	2.1e-06	32.5	44	0.139	0.22	1.8e-05	-0.08	-0.42	DOWN
Sirt2	Sirt2	3.5e-06	34.9	47	0.148	0.23	2.8e-05	-0.079	-0.42	DOWN
Brd9	Brd9	1.3e-05	69.2	93	0.285	0.37	9.1e-05	-0.089	-0.42	DOWN
Txnrd1	Txnrd1	1.4e-05	33.3	45	0.154	0.23	0.0001	-0.077	-0.42	DOWN
Ndfip2	Ndfip2	2.1e-05	39.9	53	0.166	0.24	0.00014	-0.076	-0.42	DOWN
AI413582	AI413582	0.00011	39.2	52	0.171	0.24	0.00066	-0.069	-0.42	DOWN
Vasp	Vasp	1.8e-11	175.2	237	0.535	0.66	3.3e-10	-0.12	-0.43	DOWN
Wdr1	Wdr1	1.1e-10	116.7	157	0.426	0.55	1.9e-09	-0.13	-0.43	DOWN
Srsf4	Srsf4	6.3e-09	35.3	48	0.146	0.25	8.2e-08	-0.1	-0.43	DOWN
U2af1	U2af1	7.3e-09	84.1	113	0.331	0.45	9.5e-08	-0.12	-0.43	DOWN
Nab1	Nab1	1.4e-08	55.2	74	0.209	0.32	1.7e-07	-0.11	-0.43	DOWN
Lman2	Lman2	2.3e-08	76.2	102	0.298	0.41	2.7e-07	-0.12	-0.43	DOWN
Ndufv2	Ndufv2	3.6e-08	73.7	99	0.304	0.42	4.2e-07	-0.12	-0.43	DOWN
Ap2m1	Ap2m1	3.7e-08	72.1	97	0.292	0.41	4.3e-07	-0.12	-0.43	DOWN
Spcs1	Spcs1	4.4e-08	83	112	0.334	0.45	5e-07	-0.12	-0.43	DOWN
Gnb1	Gnb1	4.5e-08	95.8	129	0.374	0.48	5.1e-07	-0.11	-0.43	DOWN
Mrpl32	Mrpl32	4.9e-08	45.2	61	0.189	0.29	5.6e-07	-0.1	-0.43	DOWN
Ppa1	Ppa1	7.7e-08	36.9	50	0.144	0.24	8.5e-07	-0.095	-0.43	DOWN
Stub1	Stub1	8.2e-08	50.7	68	0.212	0.32	9e-07	-0.1	-0.43	DOWN
Mrpl35	Mrpl35	1.7e-07	31.8	43	0.139	0.23	1.8e-06	-0.091	-0.43	DOWN
Ssr3	Ssr3	2.2e-07	50.2	67	0.21	0.31	2.2e-06	-0.1	-0.43	DOWN
Pcbd2	Pcbd2	2.7e-07	35.5	48	0.145	0.23	2.6e-06	-0.089	-0.43	DOWN
Impa1	Impa1	5.8e-07	45.9	62	0.191	0.28	5.4e-06	-0.094	-0.43	DOWN
Sptssa	Sptssa	7e-07	64.2	86	0.271	0.37	6.4e-06	-0.1	-0.43	DOWN
Bub3	Bub3	2e-06	75.2	102	0.293	0.39	1.7e-05	-0.093	-0.43	DOWN
Spata13	Spata13	3.9e-06	57.5	77	0.226	0.32	3.1e-05	-0.092	-0.43	DOWN
Cers2	Cers2	5.7e-06	35.1	47	0.155	0.23	4.4e-05	-0.08	-0.43	DOWN
Cep57	Cep57	6.9e-06	32.7	44	0.145	0.22	5.2e-05	-0.077	-0.43	DOWN
Hars	Hars	1.3e-05	28.1	38	0.133	0.21	9.1e-05	-0.073	-0.43	DOWN
Zbp1	Zbp1	1.6e-05	45.7	62	0.183	0.26	0.00011	-0.078	-0.43	DOWN
Mdm2	Mdm2	1.6e-05	35.1	47	0.145	0.22	0.00011	-0.074	-0.43	DOWN
Atp5d	Atp5d	7.8e-17	232.6	316	0.642	0.76	2.6e-15	-0.12	-0.44	DOWN
Ubl5	Ubl5	2.4e-16	222.1	302	0.622	0.74	7.8e-15	-0.12	-0.44	DOWN
Jpt1	Jpt1	4.1e-11	229.1	311	0.628	0.72	7.3e-10	-0.09	-0.44	DOWN
Atp5g1	Atp5g1	1.1e-10	192.6	260	0.553	0.67	1.8e-09	-0.11	-0.44	DOWN
Polr2j	Polr2j	5.1e-10	74.3	101	0.295	0.43	7.8e-09	-0.13	-0.44	DOWN
Hdac1	Hdac1	9.4e-09	78.3	107	0.309	0.43	1.2e-07	-0.12	-0.44	DOWN
Fam173a	Fam173a	2.4e-08	58.7	79	0.235	0.35	2.8e-07	-0.11	-0.44	DOWN
Sf3b4	Sf3b4	3e-08	34.1	46	0.15	0.25	3.5e-07	-0.1	-0.44	DOWN
Gmps	Gmps	4.8e-08	40.9	55	0.172	0.27	5.5e-07	-0.1	-0.44	DOWN
Mrpl14	Mrpl14	5.1e-08	42.3	57	0.175	0.28	5.8e-07	-0.1	-0.44	DOWN
Pdap1	Pdap1	7.9e-08	110.4	150	0.383	0.49	8.6e-07	-0.11	-0.44	DOWN
Mrpl4	Mrpl4	1.7e-07	38.7	52	0.167	0.26	1.8e-06	-0.097	-0.44	DOWN
Psmd2	Psmd2	2.8e-07	64.8	88	0.266	0.37	2.8e-06	-0.1	-0.44	DOWN
Hsbp1	Hsbp1	3.5e-07	52.4	71	0.222	0.33	3.4e-06	-0.1	-0.44	DOWN
Glrx5	Glrx5	4.1e-07	65.4	89	0.258	0.36	4e-06	-0.1	-0.44	DOWN
Mrpl13	Mrpl13	7.8e-07	40	54	0.177	0.27	7.1e-06	-0.093	-0.44	DOWN
Dph3	Dph3	9.1e-07	48.7	66	0.208	0.3	8.2e-06	-0.096	-0.44	DOWN
Gemin7	Gemin7	1.5e-06	29.7	40	0.134	0.21	1.3e-05	-0.078	-0.44	DOWN
Emc3	Emc3	4.3e-06	34.7	47	0.159	0.24	3.4e-05	-0.08	-0.44	DOWN
Hikeshi	Hikeshi	4.5e-06	31.2	43	0.145	0.22	3.5e-05	-0.079	-0.44	DOWN
Vdac1	Vdac1	6.9e-06	50.1	68	0.226	0.31	5.2e-05	-0.082	-0.44	DOWN
Naa20	Naa20	9e-06	29.8	40	0.137	0.21	6.6e-05	-0.073	-0.44	DOWN
E2f4	E2f4	1.3e-05	38.4	52	0.178	0.26	9.1e-05	-0.079	-0.44	DOWN
Lamtor3	Lamtor3	2.3e-05	32.3	44	0.152	0.22	0.00016	-0.071	-0.44	DOWN
St8sia4	St8sia4	3e-05	65.8	89	0.244	0.33	0.0002	-0.081	-0.44	DOWN
Cfl1	Cfl1	2.6e-31	857.3	1172	0.941	0.96	2.7e-29	-0.018	-0.45	DOWN
Gnai2	Gnai2	6.8e-20	413.5	564	0.798	0.86	3.2e-18	-0.064	-0.45	DOWN
Sept1	Sept1	1.2e-19	290.2	396	0.68	0.81	5.3e-18	-0.13	-0.45	DOWN
Lcp1	Lcp1	7e-19	392.3	536	0.742	0.84	2.9e-17	-0.095	-0.45	DOWN
Ucp2	Ucp2	2.9e-13	248.5	341	0.643	0.75	6.6e-12	-0.11	-0.45	DOWN
Taldo1	Taldo1	9.1e-12	138.5	189	0.475	0.61	1.7e-10	-0.13	-0.45	DOWN
Arhgdia	Arhgdia	1.7e-11	178.1	243	0.546	0.65	3.1e-10	-0.11	-0.45	DOWN
Taf15	Taf15	4.4e-10	78.5	107	0.293	0.43	6.8e-09	-0.13	-0.45	DOWN
Psma4	Psma4	5.9e-10	116.5	159	0.411	0.54	9e-09	-0.12	-0.45	DOWN
Cenpb	Cenpb	2.9e-09	33.6	46	0.132	0.23	4.1e-08	-0.1	-0.45	DOWN
Lbr	Lbr	3.5e-09	116.1	159	0.397	0.52	4.8e-08	-0.12	-0.45	DOWN
Nasp	Nasp	3.1e-08	69.9	96	0.252	0.36	3.7e-07	-0.11	-0.45	DOWN
Zdhhc18	Zdhhc18	4.3e-08	84.3	116	0.321	0.44	5e-07	-0.12	-0.45	DOWN
Sumo3	Sumo3	4.6e-08	33.3	45	0.148	0.24	5.3e-07	-0.096	-0.45	DOWN
Nme1	Nme1	6.8e-08	182.5	249	0.535	0.61	7.5e-07	-0.072	-0.45	DOWN
Ncaph2	Ncaph2	1.8e-07	36.6	50	0.161	0.26	1.8e-06	-0.095	-0.45	DOWN
Cdc123	Cdc123	2e-07	34.4	47	0.154	0.25	2.1e-06	-0.091	-0.45	DOWN
Fam192a	Fam192a	2.2e-07	32.1	44	0.139	0.23	2.2e-06	-0.089	-0.45	DOWN
Psmc3	Psmc3	2.3e-07	90.2	123	0.353	0.46	2.3e-06	-0.11	-0.45	DOWN
Eif2s1	Eif2s1	2.5e-07	68.8	94	0.296	0.4	2.5e-06	-0.11	-0.45	DOWN
Cfdp1	Cfdp1	2.8e-07	51	70	0.206	0.31	2.7e-06	-0.1	-0.45	DOWN
Ppp1r35	Ppp1r35	2.9e-07	27.3	37	0.119	0.2	2.9e-06	-0.083	-0.45	DOWN
Srpr	Srpr	3.6e-07	48.9	67	0.207	0.3	3.5e-06	-0.096	-0.45	DOWN
Commd6	Commd6	4.1e-07	39.9	55	0.175	0.27	3.9e-06	-0.093	-0.45	DOWN
Peak1	Peak1	1.5e-06	59.2	81	0.227	0.32	1.3e-05	-0.092	-0.45	DOWN
Glmp	Glmp	2e-06	38	52	0.161	0.24	1.7e-05	-0.084	-0.45	DOWN
Atad2	Atad2	4.3e-06	68.5	94	0.251	0.34	3.4e-05	-0.09	-0.45	DOWN
Rin3	Rin3	4.7e-06	31.1	43	0.137	0.21	3.7e-05	-0.075	-0.45	DOWN
Jak2	Jak2	1.2e-05	41.1	56	0.172	0.25	8.3e-05	-0.076	-0.45	DOWN
Polr2i	Polr2i	1.3e-05	34.1	47	0.151	0.23	9.2e-05	-0.077	-0.45	DOWN
Rnf115	Rnf115	1.6e-05	39.5	54	0.176	0.25	0.00011	-0.078	-0.45	DOWN
Rap2c	Rap2c	4.2e-05	32.8	45	0.142	0.21	0.00027	-0.068	-0.45	DOWN
Arpc3	Arpc3	4.3e-19	293	404	0.727	0.81	1.9e-17	-0.08	-0.46	DOWN
Sumo2	Sumo2	1.2e-16	267.2	368	0.68	0.76	4.1e-15	-0.081	-0.46	DOWN
Cox7a2	Cox7a2	1.5e-13	212.8	294	0.615	0.71	3.5e-12	-0.097	-0.46	DOWN
Usmg5	Usmg5	2.9e-13	108.2	149	0.386	0.53	6.5e-12	-0.15	-0.46	DOWN
Bcap31	Bcap31	4.6e-11	87	120	0.333	0.48	8.1e-10	-0.14	-0.46	DOWN
Raly	Raly	8.9e-11	145.2	199	0.491	0.6	1.5e-09	-0.11	-0.46	DOWN
Arpc5l	Arpc5l	1.1e-10	90.2	124	0.329	0.47	1.8e-09	-0.14	-0.46	DOWN
Ufm1	Ufm1	1.7e-09	37.8	52	0.15	0.26	2.5e-08	-0.11	-0.46	DOWN
Eif4e2	Eif4e2	2.6e-09	79.4	109	0.296	0.42	3.6e-08	-0.13	-0.46	DOWN
Ndufc2	Ndufc2	3.2e-09	81.1	112	0.327	0.45	4.3e-08	-0.12	-0.46	DOWN
Cenpx	Cenpx	3.7e-09	72.5	100	0.278	0.4	5e-08	-0.12	-0.46	DOWN
Psma1	Psma1	5.4e-09	83.9	115	0.329	0.45	7.1e-08	-0.12	-0.46	DOWN
Psmd12	Psmd12	6e-09	52.9	73	0.216	0.33	7.9e-08	-0.12	-0.46	DOWN
Mif	Mif	2.1e-08	267.1	369	0.652	0.72	2.6e-07	-0.073	-0.46	DOWN
Exosc3	Exosc3	2.5e-08	42.4	58	0.184	0.29	3e-07	-0.11	-0.46	DOWN
Pstpip1	Pstpip1	5.3e-08	63	87	0.241	0.35	6e-07	-0.11	-0.46	DOWN
Mrpl41	Mrpl41	1.2e-07	39.7	55	0.173	0.27	1.3e-06	-0.097	-0.46	DOWN
Coa3	Coa3	2.2e-07	51	70	0.228	0.33	2.2e-06	-0.1	-0.46	DOWN
Ccnh	Ccnh	5.3e-07	27.5	38	0.122	0.2	5e-06	-0.081	-0.46	DOWN
Eftud2	Eftud2	7e-07	36.5	50	0.164	0.25	6.4e-06	-0.089	-0.46	DOWN
Nucks1	Nucks1	1.5e-06	156.2	214	0.496	0.57	1.3e-05	-0.075	-0.46	DOWN
Khsrp	Khsrp	1.8e-06	35.8	49	0.168	0.25	1.5e-05	-0.086	-0.46	DOWN
Mrps18a	Mrps18a	1.1e-05	31.5	43	0.15	0.23	7.7e-05	-0.076	-0.46	DOWN
N4bp1	N4bp1	0.0002	33.6	46	0.146	0.21	0.0011	-0.061	-0.46	DOWN
Ubb	Ubb	5.8e-31	1177	1634	0.961	0.98	5.8e-29	-0.024	-0.47	DOWN
Arpc2	Arpc2	2.8e-26	443.3	614	0.82	0.9	2.1e-24	-0.079	-0.47	DOWN
Oaz1	Oaz1	1.5e-25	615.1	849	0.884	0.93	1e-23	-0.044	-0.47	DOWN
Sem1	Sem1	1e-16	238	330	0.653	0.75	3.5e-15	-0.094	-0.47	DOWN
Psma2	Psma2	9.3e-16	177.1	246	0.548	0.67	2.8e-14	-0.12	-0.47	DOWN
Gabarap	Gabarap	1.1e-13	165.9	230	0.553	0.69	2.7e-12	-0.13	-0.47	DOWN
Apobec3	Apobec3	4e-13	177.2	246	0.498	0.64	8.9e-12	-0.14	-0.47	DOWN
Rinl	Rinl	2.2e-12	179.5	248	0.531	0.68	4.4e-11	-0.15	-0.47	DOWN
Gimap5	Gimap5	1.3e-10	129.5	180	0.43	0.56	2.2e-09	-0.13	-0.47	DOWN
Cope	Cope	2.8e-10	74.5	103	0.296	0.43	4.4e-09	-0.13	-0.47	DOWN
Ppp2r1a	Ppp2r1a	1.1e-09	46.4	64	0.193	0.31	1.6e-08	-0.12	-0.47	DOWN
Ndufa12	Ndufa12	1.4e-09	83	115	0.31	0.44	2e-08	-0.13	-0.47	DOWN
Dcps	Dcps	7.4e-09	33.1	46	0.145	0.25	9.6e-08	-0.1	-0.47	DOWN
Lsm5	Lsm5	1.5e-08	84.6	117	0.327	0.44	1.9e-07	-0.11	-0.47	DOWN
Lypla2	Lypla2	1.8e-08	45.9	64	0.193	0.3	2.2e-07	-0.11	-0.47	DOWN
Me2	Me2	4.3e-08	42.1	58	0.182	0.28	4.9e-07	-0.1	-0.47	DOWN
Snapc5	Snapc5	6.4e-08	44.5	62	0.187	0.29	7.2e-07	-0.1	-0.47	DOWN
Ndufs8	Ndufs8	8.5e-08	59	82	0.241	0.35	9.3e-07	-0.1	-0.47	DOWN
Gtf2f1	Gtf2f1	1.6e-07	35.5	49	0.156	0.25	1.7e-06	-0.092	-0.47	DOWN
Ptpa	Ptpa	1.7e-07	41.1	57	0.17	0.27	1.7e-06	-0.096	-0.47	DOWN
Sft2d1	Sft2d1	6.1e-07	39.9	55	0.18	0.27	5.7e-06	-0.091	-0.47	DOWN
Inpp5d	Inpp5d	1.4e-05	49.8	69	0.213	0.29	0.0001	-0.082	-0.47	DOWN
S1pr4	S1pr4	7.5e-05	78.7	109	0.313	0.39	0.00045	-0.078	-0.47	DOWN
Eva1b	Eva1b	9.2e-05	33.8	47	0.148	0.21	0.00055	-0.064	-0.47	DOWN
Rac2	Rac2	3.9e-29	678.6	946	0.898	0.94	3.4e-27	-0.041	-0.48	DOWN
Ywhae	Ywhae	1e-11	137.1	191	0.451	0.57	1.9e-10	-0.12	-0.48	DOWN
Emp3	Emp3	2.7e-10	325.3	455	0.714	0.77	4.3e-09	-0.055	-0.48	DOWN
Bax	Bax	1.2e-09	89.2	125	0.336	0.47	1.8e-08	-0.13	-0.48	DOWN
Hnrnpab	Hnrnpab	4.5e-09	165.6	232	0.506	0.59	6e-08	-0.087	-0.48	DOWN
Sec11c	Sec11c	5.4e-09	116.4	162	0.418	0.53	7.1e-08	-0.11	-0.48	DOWN
Snrpa	Snrpa	6.5e-09	38	53	0.165	0.27	8.5e-08	-0.11	-0.48	DOWN
Mrpl12	Mrpl12	1.6e-08	63.4	88	0.256	0.37	2e-07	-0.12	-0.48	DOWN
Ddt	Ddt	3.8e-08	49.1	69	0.201	0.31	4.4e-07	-0.1	-0.48	DOWN
Sec13	Sec13	1.5e-07	35.8	50	0.16	0.25	1.6e-06	-0.095	-0.48	DOWN
Cpsf2	Cpsf2	1.6e-07	35.4	49	0.149	0.24	1.7e-06	-0.091	-0.48	DOWN
Srsf7	Srsf7	3.9e-07	87.4	122	0.348	0.45	3.8e-06	-0.1	-0.48	DOWN
Polr3k	Polr3k	7.3e-07	26.4	37	0.123	0.2	6.7e-06	-0.081	-0.48	DOWN
Szrd1	Szrd1	9.3e-07	32.7	45	0.153	0.24	8.3e-06	-0.087	-0.48	DOWN
Dhrs7	Dhrs7	4.8e-06	30.9	43	0.131	0.21	3.7e-05	-0.074	-0.48	DOWN
Ctsz	Ctsz	4.9e-05	30.7	43	0.144	0.21	0.00031	-0.066	-0.48	DOWN
Gpx1	Gpx1	0.0038	164.5	230	0.483	0.54	0.014	-0.057	-0.48	DOWN
Atp5j2	Atp5j2	7.3e-21	286.7	404	0.711	0.8	3.7e-19	-0.089	-0.49	DOWN
Snrpb	Snrpb	6.1e-15	163.4	229	0.506	0.65	1.7e-13	-0.14	-0.49	DOWN
Hcst	Hcst	4.9e-14	357	501	0.733	0.84	1.2e-12	-0.1	-0.49	DOWN
Gnb2	Gnb2	2.5e-13	167	235	0.527	0.63	5.6e-12	-0.11	-0.49	DOWN
Tkt	Tkt	4.9e-10	107.4	151	0.395	0.51	7.5e-09	-0.12	-0.49	DOWN
Kdelr2	Kdelr2	1.1e-09	26.6	37	0.109	0.21	1.7e-08	-0.098	-0.49	DOWN
Bud31	Bud31	2.7e-09	44.3	62	0.195	0.31	3.7e-08	-0.11	-0.49	DOWN
Spn	Spn	8.7e-09	164.4	232	0.491	0.6	1.1e-07	-0.11	-0.49	DOWN
Ifnar2	Ifnar2	1e-08	41.4	58	0.168	0.27	1.3e-07	-0.11	-0.49	DOWN
Txndc17	Txndc17	3.2e-08	77.6	109	0.303	0.42	3.8e-07	-0.12	-0.49	DOWN
Riok1	Riok1	5.8e-08	48.4	68	0.208	0.31	6.5e-07	-0.11	-0.49	DOWN
Dtymk	Dtymk	6.9e-08	39.2	55	0.16	0.25	7.7e-07	-0.094	-0.49	DOWN
Elf4	Elf4	1.5e-07	54.5	76	0.229	0.33	1.6e-06	-0.1	-0.49	DOWN
Ptp4a3	Ptp4a3	3.2e-07	71.2	100	0.28	0.38	3.1e-06	-0.1	-0.49	DOWN
Idh3a	Idh3a	4.5e-07	32.4	45	0.141	0.23	4.3e-06	-0.085	-0.49	DOWN
Derl2	Derl2	5.3e-07	30.6	43	0.134	0.22	4.9e-06	-0.083	-0.49	DOWN
Ppt1	Ppt1	8.8e-06	33.4	47	0.156	0.23	6.5e-05	-0.075	-0.49	DOWN
Thap3	Thap3	6.3e-05	57.5	81	0.235	0.31	0.00039	-0.071	-0.49	DOWN
Tmsb4x	Tmsb4x	7.9e-69	9039.3	12768	1	1	5.3e-66		-0.5	DOWN
Ptprcap	Ptprcap	4e-29	499.3	707	0.844	0.92	3.5e-27	-0.071	-0.5	DOWN
Uqcr11	Uqcr11	9.5e-14	112.7	159	0.405	0.55	2.3e-12	-0.15	-0.5	DOWN
Cox20	Cox20	1e-10	64	91	0.25	0.38	1.8e-09	-0.13	-0.5	DOWN
Dynlrb1	Dynlrb1	1.3e-10	84.7	120	0.324	0.46	2.2e-09	-0.14	-0.5	DOWN
Pbdc1	Pbdc1	1.3e-09	38.9	55	0.165	0.28	1.8e-08	-0.11	-0.5	DOWN
Nudc	Nudc	1.3e-09	78.6	111	0.309	0.43	1.9e-08	-0.12	-0.5	DOWN
Rab1a	Rab1a	2.6e-09	34	48	0.141	0.24	3.6e-08	-0.1	-0.5	DOWN
Uqcc2	Uqcc2	2.6e-09	65.7	93	0.275	0.39	3.6e-08	-0.12	-0.5	DOWN
Lamtor1	Lamtor1	3.9e-09	62.1	88	0.258	0.38	5.3e-08	-0.12	-0.5	DOWN
Rbmxl1	Rbmxl1	6e-09	39.4	56	0.173	0.28	7.9e-08	-0.11	-0.5	DOWN
Ube2j2	Ube2j2	1.8e-08	43	61	0.188	0.29	2.2e-07	-0.11	-0.5	DOWN
Ppp1r11	Ppp1r11	2.3e-08	58.5	83	0.243	0.36	2.8e-07	-0.11	-0.5	DOWN
Lsm8	Lsm8	1.2e-07	44.2	62	0.192	0.29	1.3e-06	-0.099	-0.5	DOWN
Mrpl28	Mrpl28	1.7e-07	35.1	50	0.158	0.25	1.8e-06	-0.094	-0.5	DOWN
Btbd1	Btbd1	6.8e-06	31.9	45	0.153	0.23	5.1e-05	-0.076	-0.5	DOWN
Uhmk1	Uhmk1	0.00028	30.4	43	0.145	0.2	0.0015	-0.059	-0.5	DOWN
Hspa5	Hspa5	1.5e-12	198.2	283	0.534	0.65	3e-11	-0.12	-0.51	DOWN
Prdx5	Prdx5	2.5e-11	80.1	114	0.316	0.46	4.5e-10	-0.14	-0.51	DOWN
Rrbp1	Rrbp1	3.8e-10	94.3	135	0.329	0.47	5.9e-09	-0.14	-0.51	DOWN
Ndufs6	Ndufs6	5.7e-10	96.9	138	0.364	0.49	8.6e-09	-0.12	-0.51	DOWN
Lamtor5	Lamtor5	6.4e-09	54.6	78	0.229	0.34	8.3e-08	-0.11	-0.51	DOWN
Kcnab2	Kcnab2	1e-08	58.4	83	0.233	0.35	1.3e-07	-0.11	-0.51	DOWN
Mical1	Mical1	2.3e-08	52.6	75	0.207	0.31	2.8e-07	-0.11	-0.51	DOWN
Mrps18c	Mrps18c	5.2e-08	46.4	66	0.21	0.31	5.9e-07	-0.1	-0.51	DOWN
Pdcl3	Pdcl3	6e-08	31.9	45	0.144	0.24	6.7e-07	-0.092	-0.51	DOWN
Azin1	Azin1	1.3e-07	36.8	52	0.16	0.25	1.4e-06	-0.091	-0.51	DOWN
Mrps7	Mrps7	2.1e-07	31.1	44	0.14	0.23	2.1e-06	-0.089	-0.51	DOWN
Yipf4	Yipf4	6.8e-07	30.4	43	0.142	0.23	6.3e-06	-0.084	-0.51	DOWN
Gna13	Gna13	7.4e-07	58.3	83	0.246	0.34	6.7e-06	-0.099	-0.51	DOWN
Pdlim2	Pdlim2	9.4e-07	37	53	0.17	0.26	8.5e-06	-0.086	-0.51	DOWN
Taf12	Taf12	9.7e-07	33.9	48	0.152	0.24	8.7e-06	-0.086	-0.51	DOWN
Abhd2	Abhd2	1.8e-06	27.6	39	0.127	0.2	1.6e-05	-0.076	-0.51	DOWN
Crot	Crot	0.00027	35.6	51	0.158	0.22	0.0014	-0.061	-0.51	DOWN
Ppp1ca	Ppp1ca	1.2e-21	299	428	0.728	0.82	6.3e-20	-0.089	-0.52	DOWN
Atp5f1	Atp5f1	2.6e-21	196.9	282	0.584	0.72	1.4e-19	-0.13	-0.52	DOWN
Cox6b1	Cox6b1	3.2e-20	238.2	341	0.661	0.76	1.5e-18	-0.1	-0.52	DOWN
Hint1	Hint1	2.5e-17	282.1	404	0.692	0.77	8.8e-16	-0.08	-0.52	DOWN
Psmb3	Psmb3	4.5e-17	188.1	269	0.584	0.7	1.6e-15	-0.12	-0.52	DOWN
Minos1	Minos1	1.6e-14	125.9	180	0.443	0.59	4.1e-13	-0.14	-0.52	DOWN
Ppp1r18	Ppp1r18	2.5e-12	147.4	212	0.476	0.61	5e-11	-0.13	-0.52	DOWN
Cap1	Cap1	4.4e-12	94.9	136	0.352	0.5	8.7e-11	-0.15	-0.52	DOWN
Zap70	Zap70	4.5e-12	90.8	130	0.341	0.49	8.8e-11	-0.15	-0.52	DOWN
Fundc2	Fundc2	3.6e-11	71.2	102	0.283	0.42	6.5e-10	-0.13	-0.52	DOWN
Lrp10	Lrp10	5.3e-11	76.5	110	0.293	0.43	9.2e-10	-0.13	-0.52	DOWN
Snx5	Snx5	2.4e-10	67.3	97	0.267	0.4	3.9e-09	-0.13	-0.52	DOWN
Pgk1	Pgk1	4.3e-10	93.7	134	0.345	0.46	6.7e-09	-0.12	-0.52	DOWN
Cmc1	Cmc1	5.7e-09	40.6	58	0.178	0.29	7.6e-08	-0.11	-0.52	DOWN
Erp44	Erp44	2e-08	37.9	54	0.167	0.27	2.5e-07	-0.1	-0.52	DOWN
Lta4h	Lta4h	3.5e-08	54.9	78	0.215	0.32	4e-07	-0.11	-0.52	DOWN
Prmt1	Prmt1	6.7e-08	66.6	95	0.282	0.39	7.4e-07	-0.11	-0.52	DOWN
Coro1c	Coro1c	1.4e-07	28.9	41	0.124	0.21	1.5e-06	-0.085	-0.52	DOWN
Usp1	Usp1	3.8e-07	46.6	67	0.193	0.28	3.6e-06	-0.089	-0.52	DOWN
Eif1ad	Eif1ad	4.3e-07	28.1	40	0.136	0.22	4.1e-06	-0.084	-0.52	DOWN
Rnf166	Rnf166	4.7e-07	63.5	91	0.244	0.34	4.5e-06	-0.098	-0.52	DOWN
Zfp593	Zfp593	4.1e-06	28.7	41	0.128	0.2	3.2e-05	-0.074	-0.52	DOWN
Jaml	Jaml	6.3e-05	39.8	57	0.153	0.22	0.00039	-0.064	-0.52	DOWN
Arpc5	Arpc5	8e-17	223.9	322	0.612	0.73	2.7e-15	-0.11	-0.53	DOWN
Uqcr10	Uqcr10	4.5e-16	161.3	233	0.509	0.65	1.4e-14	-0.14	-0.53	DOWN
Rap1a	Rap1a	2.1e-15	116.7	168	0.408	0.57	6.2e-14	-0.16	-0.53	DOWN
Taf10	Taf10	7.6e-15	169.8	244	0.535	0.67	2.1e-13	-0.13	-0.53	DOWN
Ccdc12	Ccdc12	3.1e-13	110.8	160	0.39	0.55	7e-12	-0.16	-0.53	DOWN
Eif5a	Eif5a	9.7e-13	313.7	454	0.718	0.78	2.1e-11	-0.058	-0.53	DOWN
Uqcrc1	Uqcrc1	1.1e-12	78	112	0.311	0.46	2.2e-11	-0.15	-0.53	DOWN
Rtn3	Rtn3	1.4e-12	62	90	0.242	0.38	3e-11	-0.14	-0.53	DOWN
Selenok	Selenok	9.6e-12	90.1	130	0.347	0.49	1.8e-10	-0.15	-0.53	DOWN
Vdac3	Vdac3	2.4e-11	59.6	86	0.23	0.37	4.3e-10	-0.14	-0.53	DOWN
Esd	Esd	3e-11	79.5	115	0.314	0.45	5.3e-10	-0.14	-0.53	DOWN
Sfr1	Sfr1	1.1e-09	74.7	108	0.283	0.41	1.6e-08	-0.13	-0.53	DOWN
Ifngr1	Ifngr1	2.3e-09	121.4	175	0.378	0.5	3.2e-08	-0.13	-0.53	DOWN
Ssbp4	Ssbp4	2.4e-09	60	87	0.248	0.37	3.4e-08	-0.12	-0.53	DOWN
Sf3a1	Sf3a1	6.9e-09	32.1	46	0.142	0.24	9e-08	-0.1	-0.53	DOWN
Ak2	Ak2	7.9e-09	53.7	78	0.228	0.34	1e-07	-0.11	-0.53	DOWN
Ptpre	Ptpre	1.7e-08	37.8	55	0.135	0.23	2.1e-07	-0.093	-0.53	DOWN
Rangap1	Rangap1	9.4e-08	59.4	86	0.247	0.35	1e-06	-0.1	-0.53	DOWN
Afg3l1	Afg3l1	1.6e-07	27.4	40	0.119	0.2	1.7e-06	-0.083	-0.53	DOWN
Gars	Gars	2.2e-07	42.1	61	0.191	0.29	2.2e-06	-0.098	-0.53	DOWN
Nabp2	Nabp2	4.6e-07	27.7	40	0.13	0.21	4.4e-06	-0.083	-0.53	DOWN
Cox8a	Cox8a	4.1e-35	474.6	692	0.831	0.91	4.9e-33	-0.084	-0.54	DOWN
Ndufa4	Ndufa4	6.6e-24	283.5	412	0.694	0.8	4.2e-22	-0.1	-0.54	DOWN
Elob	Elob	1.2e-23	256.8	374	0.655	0.78	7.2e-22	-0.12	-0.54	DOWN
Ndufb9	Ndufb9	1e-16	130.1	189	0.455	0.6	3.4e-15	-0.15	-0.54	DOWN
Atp5g3	Atp5g3	5.3e-15	139.8	203	0.464	0.6	1.5e-13	-0.13	-0.54	DOWN
Csnk2b	Csnk2b	6e-14	99.7	145	0.365	0.52	1.5e-12	-0.15	-0.54	DOWN
Pdia3	Pdia3	2.4e-12	109.2	159	0.39	0.52	4.8e-11	-0.13	-0.54	DOWN
Eif4a3	Eif4a3	1.1e-10	63	91	0.248	0.38	1.8e-09	-0.13	-0.54	DOWN
Tmem126a	Tmem126a	2.2e-10	33.6	49	0.144	0.26	3.5e-09	-0.11	-0.54	DOWN
Cmpk1	Cmpk1	9.3e-10	53.1	77	0.224	0.35	1.4e-08	-0.12	-0.54	DOWN
Ndufb6	Ndufb6	1.9e-09	57.8	84	0.242	0.36	2.7e-08	-0.12	-0.54	DOWN
Mydgf	Mydgf	8.9e-09	35.6	52	0.161	0.26	1.1e-07	-0.1	-0.54	DOWN
Lsm2	Lsm2	1.1e-08	42.1	61	0.179	0.28	1.4e-07	-0.11	-0.54	DOWN
Usp48	Usp48	2.4e-08	56.2	82	0.235	0.34	2.9e-07	-0.1	-0.54	DOWN
Glipr1	Glipr1	2.2e-06	39	57	0.172	0.25	1.9e-05	-0.082	-0.54	DOWN
Xaf1	Xaf1	2.7e-06	39.6	57	0.159	0.24	2.2e-05	-0.079	-0.54	DOWN
Id3	Id3	2.4e-05	55.2	81	0.158	0.23	0.00016	-0.071	-0.54	DOWN
Gnas	Gnas	1.2e-29	389.3	571	0.762	0.86	1.1e-27	-0.095	-0.55	DOWN
Ybx1	Ybx1	1.4e-19	390.1	572	0.803	0.86	6.3e-18	-0.054	-0.55	DOWN
Cox17	Cox17	2.6e-12	122.3	179	0.434	0.56	5.2e-11	-0.13	-0.55	DOWN
Cycs	Cycs	4.7e-12	102.7	150	0.369	0.5	9.2e-11	-0.13	-0.55	DOWN
Phf5a	Phf5a	1e-11	61.8	90	0.245	0.38	1.9e-10	-0.13	-0.55	DOWN
Sdhb	Sdhb	6.7e-11	80.5	118	0.322	0.45	1.2e-09	-0.13	-0.55	DOWN
Sap18	Sap18	5.4e-10	59.2	87	0.248	0.37	8.2e-09	-0.13	-0.55	DOWN
Mtpn	Mtpn	3e-09	65.6	96	0.276	0.4	4.1e-08	-0.12	-0.55	DOWN
Zbtb8os	Zbtb8os	4.7e-09	41.6	61	0.182	0.29	6.3e-08	-0.11	-0.55	DOWN
Psmd14	Psmd14	9.9e-09	50.6	74	0.218	0.33	1.3e-07	-0.11	-0.55	DOWN
Itgb1bp1	Itgb1bp1	4.3e-08	32.3	47	0.139	0.23	5e-07	-0.092	-0.55	DOWN
Rab35	Rab35	5.8e-08	31.8	46	0.146	0.24	6.5e-07	-0.094	-0.55	DOWN
Itm2c	Itm2c	3.3e-07	40.1	59	0.173	0.26	3.2e-06	-0.091	-0.55	DOWN
Hjurp	Hjurp	1.5e-05	46.9	69	0.198	0.27	0.00011	-0.074	-0.55	DOWN
Klrd1	Klrd1	0.00026	198.1	290	0.528	0.55	0.0014	-0.024	-0.55	DOWN
Myl6	Myl6	2.7e-44	747.9	1104	0.928	0.96	5.2e-42	-0.036	-0.56	DOWN
Edf1	Edf1	9.8e-20	172.5	255	0.546	0.7	4.5e-18	-0.15	-0.56	DOWN
Ldha	Ldha	9e-18	221.8	327	0.611	0.7	3.4e-16	-0.092	-0.56	DOWN
Krtcap2	Krtcap2	3.3e-15	153.1	226	0.498	0.64	9.4e-14	-0.14	-0.56	DOWN
Cd28	Cd28	8.7e-13	108.9	161	0.338	0.48	1.9e-11	-0.14	-0.56	DOWN
Atox1	Atox1	8.9e-13	107	158	0.396	0.53	1.9e-11	-0.14	-0.56	DOWN
Snrpc	Snrpc	3e-12	63.6	94	0.266	0.41	5.9e-11	-0.14	-0.56	DOWN
Eif6	Eif6	5.7e-12	70.9	104	0.283	0.43	1.1e-10	-0.15	-0.56	DOWN
Mrpl51	Mrpl51	2.9e-11	54.5	80	0.23	0.37	5.2e-10	-0.14	-0.56	DOWN
Eloc	Eloc	9.3e-11	70.5	104	0.289	0.42	1.6e-09	-0.13	-0.56	DOWN
Txnl1	Txnl1	3.4e-10	55.1	81	0.236	0.36	5.4e-09	-0.12	-0.56	DOWN
Cbx5	Cbx5	7.2e-10	45.2	67	0.169	0.28	1.1e-08	-0.11	-0.56	DOWN
P4hb	P4hb	1.1e-09	42.3	62	0.182	0.3	1.6e-08	-0.12	-0.56	DOWN
Vars	Vars	4.6e-09	55.6	82	0.234	0.35	6.2e-08	-0.11	-0.56	DOWN
Ptma	Ptma	6.6e-09	1231.7	1812	0.972	0.96	8.6e-08	0.015	-0.56	DOWN
Mlf2	Mlf2	7.7e-09	37.6	56	0.162	0.27	9.9e-08	-0.1	-0.56	DOWN
Psmd1	Psmd1	1e-08	34.3	50	0.148	0.25	1.3e-07	-0.097	-0.56	DOWN
Pttg1	Pttg1	1.1e-08	37.6	55	0.16	0.26	1.4e-07	-0.1	-0.56	DOWN
1810058I24Rik	1810058I24Rik	1.2e-08	80.4	119	0.333	0.45	1.5e-07	-0.12	-0.56	DOWN
Cisd1	Cisd1	1.7e-08	29	43	0.122	0.21	2.1e-07	-0.09	-0.56	DOWN
R3hdm4	R3hdm4	2e-08	46.2	68	0.201	0.31	2.5e-07	-0.11	-0.56	DOWN
Phgdh	Phgdh	2.4e-08	57.4	85	0.233	0.34	2.9e-07	-0.11	-0.56	DOWN
Mrpl40	Mrpl40	9.1e-08	29.8	44	0.135	0.23	9.9e-07	-0.091	-0.56	DOWN
Tpm1	Tpm1	2.2e-07	32.7	48	0.132	0.22	2.2e-06	-0.085	-0.56	DOWN
Calm1	Calm1	4.3e-39	673.9	1004	0.901	0.95	6.4e-37	-0.045	-0.57	DOWN
Arpc1b	Arpc1b	9.6e-35	374.3	555	0.779	0.88	1.1e-32	-0.1	-0.57	DOWN
H3f3b	H3f3b	2.3e-32	604.6	900	0.868	0.93	2.5e-30	-0.064	-0.57	DOWN
Uqcrq	Uqcrq	3.3e-17	166.9	247	0.523	0.65	1.2e-15	-0.13	-0.57	DOWN
Arpc4	Arpc4	1.7e-15	129.7	193	0.434	0.59	4.9e-14	-0.15	-0.57	DOWN
Flna	Flna	7.8e-15	149.3	222	0.448	0.59	2.1e-13	-0.15	-0.57	DOWN
Smdt1	Smdt1	2.1e-14	120.1	178	0.426	0.56	5.4e-13	-0.14	-0.57	DOWN
Hsp90aa1	Hsp90aa1	1.3e-12	261.7	388	0.657	0.73	2.8e-11	-0.073	-0.57	DOWN
Actn4	Actn4	2.3e-12	60.5	90	0.247	0.39	4.7e-11	-0.14	-0.57	DOWN
Bag1	Bag1	7e-12	88.7	131	0.342	0.48	1.3e-10	-0.14	-0.57	DOWN
Mrps21	Mrps21	9.3e-11	71.6	106	0.303	0.43	1.6e-09	-0.13	-0.57	DOWN
Dnajb11	Dnajb11	1.1e-10	46.5	69	0.194	0.32	1.8e-09	-0.12	-0.57	DOWN
1110008F13Rik	1110008F13Rik	1.3e-10	66	98	0.286	0.42	2.2e-09	-0.13	-0.57	DOWN
Vps36	Vps36	3.7e-10	55.2	82	0.23	0.35	5.8e-09	-0.12	-0.57	DOWN
Bola3	Bola3	3.7e-10	46.2	69	0.199	0.32	5.8e-09	-0.12	-0.57	DOWN
Cst3	Cst3	5e-10	76.3	113	0.294	0.42	7.6e-09	-0.13	-0.57	DOWN
Dnajc9	Dnajc9	6.4e-10	87.2	129	0.317	0.44	9.7e-09	-0.13	-0.57	DOWN
Trabd	Trabd	6.8e-10	31.4	47	0.129	0.23	1e-08	-0.1	-0.57	DOWN
Ube2m	Ube2m	1.1e-09	69.7	104	0.286	0.41	1.6e-08	-0.12	-0.57	DOWN
Mkrn1	Mkrn1	4.5e-09	80.3	119	0.291	0.41	6.1e-08	-0.12	-0.57	DOWN
Ide	Ide	4.9e-09	34.9	52	0.152	0.26	6.5e-08	-0.1	-0.57	DOWN
Uba2	Uba2	1.1e-08	40.8	60	0.185	0.29	1.4e-07	-0.1	-0.57	DOWN
Spg21	Spg21	4.6e-08	26.8	40	0.123	0.21	5.3e-07	-0.089	-0.57	DOWN
Hif1a	Hif1a	1.1e-07	48	72	0.202	0.3	1.2e-06	-0.094	-0.57	DOWN
Slirp	Slirp	5.7e-07	28.7	43	0.152	0.24	5.3e-06	-0.084	-0.57	DOWN
Aph1a	Aph1a	1.8e-06	29.8	44	0.144	0.22	1.5e-05	-0.078	-0.57	DOWN
Mrpl18	Mrpl18	2.1e-14	80.3	120	0.302	0.45	5.4e-13	-0.15	-0.58	DOWN
Ppp1r12a	Ppp1r12a	5.3e-14	172.6	258	0.522	0.66	1.3e-12	-0.14	-0.58	DOWN
Ndufb2	Ndufb2	3.1e-13	63.5	95	0.259	0.41	7.1e-12	-0.15	-0.58	DOWN
Baz1a	Baz1a	3.3e-11	81	121	0.302	0.43	5.9e-10	-0.13	-0.58	DOWN
Cdk4	Cdk4	1.4e-10	65.9	99	0.272	0.4	2.4e-09	-0.12	-0.58	DOWN
Arl6ip4	Arl6ip4	4.9e-10	41.9	62	0.186	0.31	7.6e-09	-0.12	-0.58	DOWN
Pop7	Pop7	8.3e-10	24.8	37	0.109	0.21	1.2e-08	-0.097	-0.58	DOWN
Sae1	Sae1	1.3e-09	38.7	58	0.177	0.29	1.8e-08	-0.11	-0.58	DOWN
Sfxn1	Sfxn1	4.4e-09	46.2	69	0.194	0.3	5.9e-08	-0.11	-0.58	DOWN
Med8	Med8	5e-09	35.2	53	0.155	0.26	6.6e-08	-0.1	-0.58	DOWN
Nubp1	Nubp1	5.3e-09	40.1	60	0.184	0.29	7e-08	-0.11	-0.58	DOWN
Kmt5a	Kmt5a	6.9e-09	48.4	72	0.206	0.31	9e-08	-0.11	-0.58	DOWN
Arl6ip1	Arl6ip1	3e-08	229	341	0.602	0.69	3.6e-07	-0.092	-0.58	DOWN
Rad21	Rad21	1.9e-07	74.6	111	0.292	0.39	2e-06	-0.097	-0.58	DOWN
Vta1	Vta1	5.3e-07	25.1	37	0.123	0.2	5e-06	-0.08	-0.58	DOWN
Nabp1	Nabp1	5.4e-07	49.7	74	0.195	0.28	5e-06	-0.089	-0.58	DOWN
Actb	Actb	5.6e-63	5676.3	8558	1	1	2.8e-60	0.00053	-0.59	DOWN
Cox5a	Cox5a	5.2e-21	193.2	291	0.569	0.7	2.6e-19	-0.13	-0.59	DOWN
Ndufa11	Ndufa11	2.2e-14	92.9	140	0.352	0.5	5.6e-13	-0.15	-0.59	DOWN
Rnaseh2c	Rnaseh2c	5.1e-13	81.8	123	0.308	0.46	1.1e-11	-0.15	-0.59	DOWN
Pfdn1	Pfdn1	1.7e-12	47.2	71	0.201	0.34	3.5e-11	-0.14	-0.59	DOWN
Atp2b1	Atp2b1	1.8e-11	129.3	194	0.394	0.53	3.3e-10	-0.14	-0.59	DOWN
Lsm3	Lsm3	2.6e-10	51.7	78	0.223	0.34	4.2e-09	-0.12	-0.59	DOWN
Adprh	Adprh	7e-10	33.8	51	0.147	0.26	1.1e-08	-0.11	-0.59	DOWN
Lgals3bp	Lgals3bp	1.2e-08	49.8	75	0.201	0.3	1.5e-07	-0.1	-0.59	DOWN
Stx8	Stx8	5.4e-08	29.1	44	0.131	0.22	6.1e-07	-0.09	-0.59	DOWN
Cdc42	Cdc42	4e-30	354.5	537	0.753	0.86	3.8e-28	-0.1	-0.6	DOWN
Capzb	Capzb	1.5e-22	214.5	325	0.611	0.73	8.6e-21	-0.12	-0.6	DOWN
Dnajc19	Dnajc19	8.2e-11	42.9	65	0.19	0.31	1.4e-09	-0.12	-0.6	DOWN
Vbp1	Vbp1	4.4e-10	37	56	0.162	0.28	6.8e-09	-0.11	-0.6	DOWN
Nfatc1	Nfatc1	4.8e-10	60.5	92	0.243	0.36	7.4e-09	-0.12	-0.6	DOWN
Hpf1	Hpf1	7.4e-08	45.3	69	0.199	0.3	8.1e-07	-0.098	-0.6	DOWN
Rassf1	Rassf1	8e-06	32.5	49	0.152	0.22	6e-05	-0.073	-0.6	DOWN
Sh3bgrl3	Sh3bgrl3	1.1e-33	582.8	891	0.877	0.93	1.2e-31	-0.049	-0.61	DOWN
Psmb5	Psmb5	1.3e-16	106.6	162	0.394	0.55	4.3e-15	-0.16	-0.61	DOWN
Tmem14c	Tmem14c	1.2e-12	88.2	135	0.34	0.48	2.6e-11	-0.14	-0.61	DOWN
Bscl2	Bscl2	4.2e-09	33.7	51	0.149	0.25	5.6e-08	-0.1	-0.61	DOWN
Sar1b	Sar1b	4.4e-09	32.8	50	0.143	0.24	5.9e-08	-0.1	-0.61	DOWN
Nxt1	Nxt1	6.2e-09	24.7	38	0.115	0.21	8.1e-08	-0.093	-0.61	DOWN
Map4k1	Map4k1	3.2e-08	29.2	45	0.132	0.22	3.8e-07	-0.089	-0.61	DOWN
Rnf138	Rnf138	5.3e-08	45.1	69	0.201	0.3	6e-07	-0.099	-0.61	DOWN
Rbm3	Rbm3	8e-29	338	520	0.723	0.82	7e-27	-0.099	-0.62	DOWN
Hsp90b1	Hsp90b1	2.2e-17	181.8	279	0.516	0.65	7.9e-16	-0.14	-0.62	DOWN
Lsm6	Lsm6	5.2e-15	72.1	111	0.275	0.43	1.5e-13	-0.16	-0.62	DOWN
Psmb7	Psmb7	4.8e-12	53	82	0.229	0.36	9.3e-11	-0.13	-0.62	DOWN
Rnps1	Rnps1	1e-11	47.2	73	0.193	0.32	1.9e-10	-0.13	-0.62	DOWN
Ssr1	Ssr1	1.5e-11	45.3	70	0.189	0.32	2.8e-10	-0.13	-0.62	DOWN
Topbp1	Topbp1	1.4e-10	37	57	0.154	0.27	2.3e-09	-0.11	-0.62	DOWN
Coro1b	Coro1b	3.4e-10	53.7	83	0.229	0.35	5.4e-09	-0.12	-0.62	DOWN
Cdk5rap3	Cdk5rap3	3.7e-10	36.9	57	0.163	0.28	5.9e-09	-0.11	-0.62	DOWN
Snrnp40	Snrnp40	3.9e-10	37.5	58	0.174	0.29	6.1e-09	-0.12	-0.62	DOWN
Nptn	Nptn	4.9e-10	45	69	0.193	0.31	7.5e-09	-0.11	-0.62	DOWN
Lpxn	Lpxn	2.9e-09	29.5	45	0.134	0.23	4e-08	-0.1	-0.62	DOWN
Phf11b	Phf11b	3.4e-09	42.3	65	0.163	0.26	4.6e-08	-0.1	-0.62	DOWN
Csrp1	Csrp1	7.9e-09	27.5	42	0.117	0.21	1e-07	-0.092	-0.62	DOWN
Cox5b	Cox5b	3e-24	236.5	367	0.641	0.75	1.9e-22	-0.11	-0.63	DOWN
Hmgb1	Hmgb1	7.7e-24	421.6	651	0.794	0.87	4.8e-22	-0.075	-0.63	DOWN
Abracl	Abracl	2.3e-22	215.2	334	0.612	0.74	1.3e-20	-0.13	-0.63	DOWN
Ube2l3	Ube2l3	2.2e-16	97.5	151	0.369	0.52	7e-15	-0.16	-0.63	DOWN
1810037I17Rik	1810037I17Rik	4.4e-14	100.3	155	0.37	0.51	1.1e-12	-0.14	-0.63	DOWN
Ube2n	Ube2n	1.3e-12	53.2	82	0.233	0.37	2.7e-11	-0.14	-0.63	DOWN
Sla	Sla	3.7e-12	60.6	94	0.238	0.38	7.2e-11	-0.14	-0.63	DOWN
Rpn1	Rpn1	4e-11	44.1	68	0.191	0.32	7.1e-10	-0.13	-0.63	DOWN
Cstb	Cstb	5e-11	35.9	56	0.158	0.28	8.8e-10	-0.12	-0.63	DOWN
Timm8b	Timm8b	2.7e-09	36.2	56	0.151	0.26	3.8e-08	-0.11	-0.63	DOWN
Rab11a	Rab11a	1.7e-08	31.8	49	0.145	0.24	2.1e-07	-0.093	-0.63	DOWN
Tspo	Tspo	6.8e-17	197.9	308	0.575	0.7	2.3e-15	-0.12	-0.64	DOWN
Pfkp	Pfkp	6.3e-16	72.5	113	0.273	0.44	1.9e-14	-0.17	-0.64	DOWN
Magoh	Magoh	2.1e-13	70.6	110	0.284	0.43	4.8e-12	-0.15	-0.64	DOWN
Fam96a	Fam96a	1.5e-12	50.2	78	0.211	0.35	3.1e-11	-0.14	-0.64	DOWN
Iqgap2	Iqgap2	4.1e-10	52.9	82	0.2	0.32	6.5e-09	-0.12	-0.64	DOWN
Anp32e	Anp32e	8.9e-10	84.6	131	0.316	0.43	1.3e-08	-0.11	-0.64	DOWN
Dbf4	Dbf4	2.7e-07	28.3	44	0.124	0.2	2.7e-06	-0.078	-0.64	DOWN
Pfn1	Pfn1	3.4e-59	1017	1599	0.933	0.97	1.4e-56	-0.036	-0.65	DOWN
Anp32b	Anp32b	2.3e-18	257.4	404	0.653	0.73	9.1e-17	-0.08	-0.65	DOWN
Aurkaip1	Aurkaip1	4.2e-18	83.9	132	0.313	0.5	1.6e-16	-0.18	-0.65	DOWN
Ost4	Ost4	2.9e-17	102.5	161	0.389	0.55	1e-15	-0.16	-0.65	DOWN
Mea1	Mea1	9.7e-10	28.9	45	0.129	0.23	1.4e-08	-0.1	-0.65	DOWN
Cmtm7	Cmtm7	9.7e-10	70.4	110	0.272	0.38	1.4e-08	-0.11	-0.65	DOWN
Ndfip1	Ndfip1	9.2e-09	32.1	50	0.139	0.24	1.2e-07	-0.096	-0.65	DOWN
Rbl2	Rbl2	7.9e-07	41.4	65	0.187	0.27	7.2e-06	-0.085	-0.65	DOWN
Atp5j	Atp5j	3.3e-25	208.6	330	0.59	0.73	2.3e-23	-0.14	-0.66	DOWN
Ywhaq	Ywhaq	2e-19	107.6	170	0.396	0.56	8.9e-18	-0.17	-0.66	DOWN
Higd1a	Higd1a	9.6e-18	74.2	118	0.283	0.46	3.5e-16	-0.17	-0.66	DOWN
Pim1	Pim1	7e-14	81.6	129	0.242	0.39	1.7e-12	-0.15	-0.66	DOWN
Commd1	Commd1	1.9e-11	28.4	45	0.123	0.24	3.5e-10	-0.11	-0.66	DOWN
Arpc1a	Arpc1a	2.3e-10	26.5	42	0.124	0.23	3.8e-09	-0.11	-0.66	DOWN
Sh2d3c	Sh2d3c	7.5e-09	40.3	64	0.177	0.28	9.7e-08	-0.099	-0.66	DOWN
Hexb	Hexb	4e-08	25.1	40	0.119	0.2	4.6e-07	-0.085	-0.66	DOWN
Tox	Tox	1.3e-06	53.3	84	0.203	0.29	1.1e-05	-0.082	-0.66	DOWN
Psmd13	Psmd13	7.3e-16	53.6	85	0.223	0.38	2.2e-14	-0.16	-0.67	DOWN
Ccdc124	Ccdc124	9.4e-15	42.2	67	0.173	0.32	2.5e-13	-0.14	-0.67	DOWN
Akt1	Akt1	9.3e-12	36.2	57	0.158	0.28	1.8e-10	-0.12	-0.67	DOWN
Pin1	Pin1	1.3e-10	34.3	55	0.158	0.27	2.1e-09	-0.11	-0.67	DOWN
Arl1	Arl1	3.8e-10	30.4	48	0.138	0.24	5.9e-09	-0.11	-0.67	DOWN
Racgap1	Racgap1	2.3e-07	52.5	84	0.207	0.3	2.3e-06	-0.091	-0.67	DOWN
Pkm	Pkm	1.1e-17	155.9	250	0.499	0.62	4e-16	-0.13	-0.68	DOWN
Ndufb8	Ndufb8	1.7e-17	81.3	131	0.317	0.48	6.1e-16	-0.16	-0.68	DOWN
Gabarapl2	Gabarapl2	9.3e-15	85.5	137	0.329	0.48	2.5e-13	-0.15	-0.68	DOWN
Smpdl3a	Smpdl3a	2.3e-09	57	91	0.238	0.35	3.3e-08	-0.11	-0.68	DOWN
Anxa6	Anxa6	8.5e-24	211.4	340	0.59	0.73	5.2e-22	-0.14	-0.69	DOWN
Capns1	Capns1	7.2e-17	91.3	147	0.352	0.52	2.4e-15	-0.17	-0.69	DOWN
Psmb2	Psmb2	5e-16	85.9	138	0.34	0.49	1.6e-14	-0.15	-0.69	DOWN
Rab1b	Rab1b	1.2e-12	35.2	57	0.153	0.28	2.6e-11	-0.13	-0.69	DOWN
Vps29	Vps29	1.2e-12	51.3	83	0.224	0.36	2.6e-11	-0.14	-0.69	DOWN
Mvb12a	Mvb12a	2.9e-11	35.9	58	0.156	0.27	5.2e-10	-0.12	-0.69	DOWN
Pnp	Pnp	3.6e-11	29.6	48	0.13	0.24	6.4e-10	-0.11	-0.69	DOWN
Ube2a	Ube2a	1e-10	32.9	53	0.153	0.27	1.7e-09	-0.11	-0.69	DOWN
C1d	C1d	1.6e-10	26.7	43	0.121	0.23	2.7e-09	-0.11	-0.69	DOWN
Cyba	Cyba	1.6e-33	342.4	557	0.726	0.85	1.8e-31	-0.13	-0.7	DOWN
Ywhah	Ywhah	7.1e-18	93.8	152	0.336	0.5	2.7e-16	-0.17	-0.7	DOWN
Lamtor4	Lamtor4	6.3e-15	66.3	108	0.27	0.43	1.8e-13	-0.16	-0.7	DOWN
Med10	Med10	2.4e-13	45.3	73	0.192	0.33	5.6e-12	-0.14	-0.7	DOWN
Elof1	Elof1	3.6e-12	31.7	51	0.143	0.26	7.1e-11	-0.12	-0.7	DOWN
Mcm4	Mcm4	6.1e-10	33.5	55	0.142	0.24	9.2e-09	-0.1	-0.7	DOWN
Acsl5	Acsl5	1.6e-09	33.8	55	0.153	0.26	2.3e-08	-0.1	-0.7	DOWN
Tmem256	Tmem256	1.3e-13	45	74	0.199	0.34	3e-12	-0.14	-0.71	DOWN
Rgs3	Rgs3	6.7e-12	35.2	58	0.144	0.26	1.3e-10	-0.12	-0.71	DOWN
Ranbp1	Ranbp1	7.4e-11	105.9	173	0.385	0.48	1.3e-09	-0.098	-0.71	DOWN
Timm17b	Timm17b	5e-10	26.3	43	0.125	0.23	7.7e-09	-0.1	-0.71	DOWN
Ckap5	Ckap5	1.6e-08	32.5	53	0.136	0.23	1.9e-07	-0.092	-0.71	DOWN
Clic1	Clic1	9.4e-35	328.1	539	0.736	0.83	1.1e-32	-0.098	-0.72	DOWN
Pomp	Pomp	1e-25	147.4	243	0.504	0.66	7.2e-24	-0.15	-0.72	DOWN
Ndufb7	Ndufb7	1.3e-22	135.9	223	0.468	0.62	7.6e-21	-0.16	-0.72	DOWN
Lsp1	Lsp1	2e-22	322.4	531	0.717	0.81	1.1e-20	-0.094	-0.72	DOWN
Snx3	Snx3	1.9e-19	75.7	125	0.303	0.48	8.5e-18	-0.17	-0.72	DOWN
Hprt	Hprt	4.5e-15	57.1	94	0.244	0.39	1.3e-13	-0.15	-0.72	DOWN
Prex1	Prex1	5.6e-13	95.4	157	0.338	0.47	1.2e-11	-0.14	-0.72	DOWN
Ebp	Ebp	3.3e-12	39.7	65	0.177	0.3	6.5e-11	-0.13	-0.72	DOWN
Crlf2	Crlf2	6.7e-12	35.5	59	0.147	0.27	1.3e-10	-0.12	-0.72	DOWN
B3gat3	B3gat3	1.9e-10	30	49	0.136	0.24	3.1e-09	-0.11	-0.72	DOWN
Dennd4a	Dennd4a	3.2e-10	52.3	86	0.186	0.3	5.1e-09	-0.11	-0.72	DOWN
Ppp1r2	Ppp1r2	2.4e-08	25.4	42	0.126	0.22	2.8e-07	-0.09	-0.72	DOWN
Sipa1	Sipa1	5.2e-20	76.5	127	0.291	0.48	2.5e-18	-0.19	-0.73	DOWN
Ap2s1	Ap2s1	1.9e-17	68.9	114	0.273	0.44	6.7e-16	-0.17	-0.73	DOWN
Bsg	Bsg	6.1e-16	88	146	0.336	0.49	1.9e-14	-0.15	-0.73	DOWN
Snf8	Snf8	9.5e-15	47.2	78	0.208	0.36	2.5e-13	-0.15	-0.73	DOWN
Emd	Emd	1.4e-13	36.8	61	0.16	0.29	3.2e-12	-0.13	-0.73	DOWN
Tmpo	Tmpo	8e-11	81.2	135	0.299	0.42	1.4e-09	-0.12	-0.73	DOWN
Blmh	Blmh	1e-10	33.5	56	0.159	0.27	1.8e-09	-0.11	-0.73	DOWN
Ap3s1	Ap3s1	1.2e-10	26.8	45	0.12	0.22	2.1e-09	-0.1	-0.73	DOWN
Pkp3	Pkp3	6.7e-08	38.4	64	0.167	0.26	7.5e-07	-0.089	-0.73	DOWN
Srgn	Srgn	3.5e-33	290.3	486	0.656	0.8	3.9e-31	-0.15	-0.74	DOWN
Snrpd1	Snrpd1	3.3e-15	78.5	131	0.3	0.44	9.4e-14	-0.14	-0.74	DOWN
Psmc4	Psmc4	5.3e-18	54	91	0.226	0.4	2e-16	-0.17	-0.75	DOWN
Tm6sf1	Tm6sf1	3.6e-14	67.7	114	0.248	0.39	9e-13	-0.14	-0.75	DOWN
Mtch1	Mtch1	5.2e-14	37.8	63	0.155	0.29	1.3e-12	-0.14	-0.75	DOWN
Myo1g	Myo1g	2.3e-12	61.9	104	0.259	0.39	4.7e-11	-0.13	-0.75	DOWN
Cited2	Cited2	1.9e-11	49.8	84	0.178	0.3	3.4e-10	-0.12	-0.75	DOWN
Serinc3	Serinc3	1.5e-17	103.7	176	0.338	0.5	5.3e-16	-0.16	-0.76	DOWN
Cst7	Cst7	1.6e-15	69.5	118	0.256	0.41	4.7e-14	-0.15	-0.76	DOWN
Pgam1	Pgam1	2e-15	46.7	79	0.203	0.36	5.8e-14	-0.15	-0.76	DOWN
Prdx1	Prdx1	2.4e-26	172.7	293	0.533	0.68	1.8e-24	-0.14	-0.77	DOWN
Ran	Ran	6e-21	230.4	394	0.631	0.72	3e-19	-0.085	-0.77	DOWN
Zmiz1	Zmiz1	5.3e-13	44.6	76	0.181	0.31	1.2e-11	-0.13	-0.77	DOWN
Pon2	Pon2	4.8e-10	27.2	46	0.127	0.23	7.4e-09	-0.099	-0.77	DOWN
Ergic3	Ergic3	8e-10	29.9	51	0.137	0.24	1.2e-08	-0.1	-0.77	DOWN
Ptpn7	Ptpn7	3.7e-18	50.2	86	0.197	0.36	1.4e-16	-0.16	-0.78	DOWN
Ddost	Ddost	4.2e-16	44.4	76	0.2	0.35	1.3e-14	-0.15	-0.78	DOWN
Nsmaf	Nsmaf	4.8e-13	38	65	0.157	0.28	1.1e-11	-0.13	-0.78	DOWN
Vamp8	Vamp8	3.2e-14	70.9	123	0.291	0.44	8e-13	-0.15	-0.79	DOWN
Lrmp	Lrmp	1.6e-13	43.2	75	0.188	0.32	3.7e-12	-0.13	-0.79	DOWN
Ptpn11	Ptpn11	2.2e-09	32.3	56	0.144	0.24	3.1e-08	-0.097	-0.79	DOWN
Ctsb	Ctsb	6.6e-15	59.2	103	0.233	0.38	1.8e-13	-0.15	-0.8	DOWN
Ddx39	Ddx39	2.9e-14	46.8	81	0.209	0.35	7.3e-13	-0.14	-0.8	DOWN
Rab8b	Rab8b	9.6e-14	49.9	87	0.21	0.35	2.3e-12	-0.14	-0.8	DOWN
Rnh1	Rnh1	1.1e-13	30.5	53	0.137	0.26	2.5e-12	-0.13	-0.8	DOWN
Fkbp2	Fkbp2	2.2e-12	30	52	0.133	0.25	4.5e-11	-0.12	-0.8	DOWN
Siva1	Siva1	7.1e-11	26.7	46	0.118	0.22	1.2e-09	-0.1	-0.8	DOWN
Prelid1	Prelid1	1.7e-24	101.5	179	0.387	0.56	1.1e-22	-0.18	-0.81	DOWN
Dek	Dek	8.2e-18	158.4	278	0.5	0.62	3.1e-16	-0.12	-0.81	DOWN
Erh	Erh	7e-15	41.8	73	0.18	0.32	1.9e-13	-0.14	-0.81	DOWN
Acadl	Acadl	3.9e-13	39.9	70	0.168	0.3	8.8e-12	-0.13	-0.81	DOWN
Bex3	Bex3	7.9e-13	29.2	51	0.12	0.24	1.7e-11	-0.12	-0.81	DOWN
Hras	Hras	3.4e-13	29.8	52	0.133	0.26	7.7e-12	-0.12	-0.82	DOWN
Rfc2	Rfc2	1.5e-12	36.7	65	0.163	0.28	3.1e-11	-0.12	-0.82	DOWN
Tpm4	Tpm4	1.2e-18	85	151	0.307	0.47	4.9e-17	-0.16	-0.83	DOWN
Ikzf3	Ikzf3	4e-17	78.3	139	0.276	0.44	1.4e-15	-0.16	-0.83	DOWN
Hmgn5	Hmgn5	3.6e-14	30.7	55	0.116	0.24	9e-13	-0.12	-0.83	DOWN
Etfb	Etfb	6.1e-19	48.4	86	0.203	0.37	2.5e-17	-0.17	-0.84	DOWN
Ssr2	Ssr2	3.4e-16	46.7	83	0.204	0.36	1.1e-14	-0.15	-0.84	DOWN
Ubl4a	Ubl4a	9.1e-15	29.8	53	0.13	0.26	2.5e-13	-0.13	-0.84	DOWN
Sntb2	Sntb2	7.7e-10	27.2	49	0.115	0.21	1.2e-08	-0.095	-0.84	DOWN
Sh2d2a	Sh2d2a	1.6e-21	69.4	125	0.256	0.44	8.6e-20	-0.19	-0.85	DOWN
H2afv	H2afv	3.2e-16	133.5	241	0.438	0.58	1e-14	-0.14	-0.85	DOWN
Alyref	Alyref	3.4e-16	44.7	81	0.196	0.34	1.1e-14	-0.15	-0.85	DOWN
Nucb1	Nucb1	2.1e-14	36.8	67	0.168	0.3	5.4e-13	-0.14	-0.85	DOWN
Ttc39b	Ttc39b	2.5e-14	36.2	65	0.148	0.28	6.3e-13	-0.13	-0.85	DOWN
Trappc1	Trappc1	1.4e-12	24	43	0.106	0.22	2.8e-11	-0.11	-0.85	DOWN
Ctsw	Ctsw	1.9e-26	137.1	249	0.433	0.61	1.4e-24	-0.18	-0.86	DOWN
Prdx2	Prdx2	7.1e-15	98.3	179	0.343	0.49	1.9e-13	-0.15	-0.86	DOWN
Fyn	Fyn	2.1e-28	130.5	238	0.431	0.63	1.8e-26	-0.2	-0.87	DOWN
Rps27l	Rps27l	4.2e-23	83	152	0.315	0.5	2.5e-21	-0.19	-0.87	DOWN
Cdk6	Cdk6	2.3e-14	34.1	63	0.126	0.25	5.9e-13	-0.13	-0.87	DOWN
Dap	Dap	5e-14	47.3	86	0.194	0.33	1.2e-12	-0.14	-0.87	DOWN
1110008P14Rik	1110008P14Rik	9.7e-12	30.2	55	0.134	0.25	1.8e-10	-0.11	-0.87	DOWN
Gimap4	Gimap4	1.8e-45	300.5	552	0.665	0.82	3.6e-43	-0.16	-0.88	DOWN
Itgal	Itgal	2.9e-25	112.3	207	0.393	0.59	2e-23	-0.19	-0.88	DOWN
Dynll2	Dynll2	2e-13	26.2	48	0.117	0.24	4.6e-12	-0.12	-0.88	DOWN
Ech1	Ech1	6.8e-16	41.2	76	0.176	0.32	2.1e-14	-0.15	-0.89	DOWN
Slc25a39	Slc25a39	1e-13	20.8	39	0.088	0.2	2.5e-12	-0.11	-0.89	DOWN
Map7d1	Map7d1	5.1e-13	26.5	49	0.123	0.24	1.1e-11	-0.12	-0.89	DOWN
Aplp2	Aplp2	1e-10	26.9	50	0.11	0.21	1.7e-09	-0.1	-0.89	DOWN
Dbi	Dbi	2.9e-21	88.4	165	0.318	0.48	1.5e-19	-0.17	-0.9	DOWN
Selenoh	Selenoh	5.6e-18	73.9	138	0.299	0.45	2.1e-16	-0.15	-0.9	DOWN
Tnfrsf18	Tnfrsf18	5.9e-15	37.1	69	0.158	0.29	1.6e-13	-0.14	-0.9	DOWN
Smap1	Smap1	2e-22	68.9	129	0.263	0.46	1.1e-20	-0.2	-0.91	DOWN
Calm3	Calm3	1.1e-22	80.6	152	0.308	0.48	6.2e-21	-0.18	-0.92	DOWN
Hat1	Hat1	2.3e-12	23	44	0.111	0.22	4.8e-11	-0.11	-0.92	DOWN
Hba-a1	Hba-a1	0.00029	1256.4	2379	0.562	0.64	0.0015	-0.08	-0.92	DOWN
Hba-a2	Hba-a2	0.0027	941.9	1783	0.525	0.58	0.01	-0.056	-0.92	DOWN
Actg1	Actg1	7.3e-65	1081.6	2062	0.939	0.97	3.7e-62	-0.028	-0.93	DOWN
Calm2	Calm2	2e-29	142.5	272	0.468	0.65	1.8e-27	-0.19	-0.93	DOWN
Dnmt1	Dnmt1	7e-17	58.5	111	0.24	0.39	2.4e-15	-0.15	-0.93	DOWN
Samsn1	Samsn1	2.8e-14	28.6	54	0.119	0.24	7e-13	-0.12	-0.93	DOWN
Batf	Batf	3.6e-10	26.7	51	0.117	0.21	5.7e-09	-0.097	-0.93	DOWN
Hbb-bs	Hbb-bs	0.0025	3569.9	6800	0.661	0.7	0.0098	-0.039	-0.93	DOWN
Atpif1	Atpif1	1.4e-18	75.6	145	0.286	0.45	5.8e-17	-0.16	-0.94	DOWN
Cers4	Cers4	2.9e-11	30.2	58	0.127	0.23	5.2e-10	-0.11	-0.94	DOWN
Cd82	Cd82	4.5e-22	64	124	0.237	0.42	2.5e-20	-0.18	-0.95	DOWN
Ly6c2	Ly6c2	3e-19	326.3	630	0.388	0.53	1.3e-17	-0.14	-0.95	DOWN
Itga4	Itga4	8e-15	254.5	492	0.553	0.64	2.2e-13	-0.089	-0.95	DOWN
Prelid3b	Prelid3b	1e-14	19.7	38	0.087	0.2	2.8e-13	-0.12	-0.95	DOWN
Zfpm1	Zfpm1	1e-15	28.3	55	0.116	0.25	3.1e-14	-0.13	-0.96	DOWN
Gata3	Gata3	1.5e-12	22.8	44	0.099	0.21	3.2e-11	-0.11	-0.96	DOWN
Pla2g16	Pla2g16	5.8e-28	68.3	134	0.256	0.47	4.9e-26	-0.22	-0.97	DOWN
Prf1	Prf1	1.6e-10	42.8	84	0.168	0.27	2.7e-09	-0.11	-0.97	DOWN
Sub1	Sub1	1.8e-53	314	621	0.688	0.84	5.6e-51	-0.15	-0.98	DOWN
Pdia6	Pdia6	3e-19	40.7	81	0.178	0.34	1.3e-17	-0.16	-0.98	DOWN
Fam204a	Fam204a	1.3e-13	24	47	0.102	0.22	3.1e-12	-0.11	-0.98	DOWN
Pcna	Pcna	7.9e-14	42.3	84	0.176	0.3	1.9e-12	-0.13	-0.99	DOWN
Syngr2	Syngr2	1.3e-14	22.2	44	0.107	0.23	3.4e-13	-0.12	-1	DOWN
Hbb-bt	Hbb-bt	0.0077	1128.7	2270	0.546	0.61	0.026	-0.061	-1.01	DOWN
Cdk2ap1	Cdk2ap1	8.8e-17	27.9	57	0.134	0.27	2.9e-15	-0.14	-1.02	DOWN
Mcm7	Mcm7	3.2e-14	41.3	83	0.16	0.28	8e-13	-0.12	-1.02	DOWN
Pycard	Pycard	2.9e-27	145.6	296	0.461	0.63	2.3e-25	-0.17	-1.03	DOWN
Hist1h1e	Hist1h1e	4.3e-06	63.6	131	0.22	0.29	3.4e-05	-0.072	-1.04	DOWN
Cd48	Cd48	3.9e-28	122.8	255	0.428	0.62	3.3e-26	-0.19	-1.05	DOWN
Nans	Nans	1.6e-18	30	62	0.143	0.3	6.6e-17	-0.15	-1.05	DOWN
Sh3bgrl	Sh3bgrl	7.1e-15	25.5	53	0.12	0.25	1.9e-13	-0.13	-1.05	DOWN
Bak1	Bak1	1.2e-14	22.3	46	0.108	0.23	3.2e-13	-0.12	-1.05	DOWN
Ctsd	Ctsd	4.1e-38	161.9	339	0.516	0.7	5.6e-36	-0.19	-1.06	DOWN
Reep5	Reep5	1.1e-26	79.1	165	0.303	0.49	8.5e-25	-0.19	-1.06	DOWN
Fkbp5	Fkbp5	2.8e-12	20	42	0.098	0.2	5.6e-11	-0.1	-1.06	DOWN
Vmp1	Vmp1	5.9e-20	35.1	74	0.151	0.31	2.8e-18	-0.16	-1.07	DOWN
Cmc2	Cmc2	1.1e-14	21.6	45	0.095	0.21	2.9e-13	-0.12	-1.07	DOWN
Tuba1b	Tuba1b	3.3e-07	153.7	322	0.467	0.51	3.2e-06	-0.045	-1.07	DOWN
Crip1	Crip1	5.9e-45	606.3	1281	0.826	0.89	1.2e-42	-0.063	-1.08	DOWN
S100a13	S100a13	5.1e-32	105.7	225	0.393	0.6	5.5e-30	-0.21	-1.09	DOWN
Tbcb	Tbcb	1.2e-21	28.9	61	0.134	0.3	6.5e-20	-0.17	-1.09	DOWN
St3gal6	St3gal6	1.7e-14	26.1	55	0.126	0.25	4.5e-13	-0.12	-1.09	DOWN
Slbp	Slbp	6.2e-22	51.7	111	0.205	0.38	3.4e-20	-0.17	-1.1	DOWN
Rpa2	Rpa2	1.2e-18	28.7	62	0.122	0.27	4.9e-17	-0.15	-1.1	DOWN
Lpin1	Lpin1	8.5e-12	26.5	57	0.109	0.21	1.6e-10	-0.1	-1.1	DOWN
Gapdh	Gapdh	5e-67	395.6	861	0.78	0.88	2.6e-64	-0.1	-1.12	DOWN
Bcl7c	Bcl7c	4.6e-18	23.1	50	0.105	0.24	1.8e-16	-0.14	-1.12	DOWN
Vim	Vim	1.7e-24	214.2	472	0.494	0.64	1.1e-22	-0.14	-1.14	DOWN
Mirt1	Mirt1	6.1e-17	30.3	67	0.122	0.26	2.1e-15	-0.13	-1.14	DOWN
Itgb2	Itgb2	7.5e-42	102.4	227	0.359	0.61	1.3e-39	-0.25	-1.15	DOWN
Nbeal2	Nbeal2	4.8e-19	29.7	66	0.135	0.29	2e-17	-0.15	-1.15	DOWN
Cdc42ep3	Cdc42ep3	3e-16	28.8	64	0.127	0.26	9.7e-15	-0.13	-1.15	DOWN
Psen2	Psen2	3.2e-16	21	47	0.098	0.22	1e-14	-0.12	-1.15	DOWN
Tpi1	Tpi1	1e-17	26.4	59	0.124	0.26	3.8e-16	-0.14	-1.16	DOWN
Lax1	Lax1	1.3e-16	24.6	55	0.112	0.24	4.3e-15	-0.13	-1.16	DOWN
Dok2	Dok2	4.8e-21	30.1	68	0.125	0.28	2.4e-19	-0.16	-1.17	DOWN
AU020206	AU020206	1.1e-16	33	74	0.144	0.28	3.6e-15	-0.14	-1.17	DOWN
Hist1h4d	Hist1h4d	4.6e-07	31.6	71	0.136	0.21	4.3e-06	-0.075	-1.17	DOWN
Sh2d1a	Sh2d1a	2.6e-29	62.5	142	0.232	0.44	2.3e-27	-0.21	-1.18	DOWN
Cdc25b	Cdc25b	1.9e-13	23.6	54	0.1	0.21	4.3e-12	-0.11	-1.18	DOWN
Mapre2	Mapre2	7.9e-19	18.6	43	0.078	0.21	3.3e-17	-0.13	-1.2	DOWN
Mcm6	Mcm6	1.8e-17	40.2	92	0.173	0.31	6.6e-16	-0.14	-1.2	DOWN
Ube2s	Ube2s	1e-20	89.3	207	0.326	0.49	5.2e-19	-0.16	-1.21	DOWN
Mcm2	Mcm2	9e-18	19	45	0.087	0.22	3.4e-16	-0.13	-1.24	DOWN
Ubash3b	Ubash3b	1.4e-17	24.6	58	0.109	0.24	5.3e-16	-0.13	-1.25	DOWN
Mcm3	Mcm3	3.1e-16	34.9	83	0.141	0.27	9.9e-15	-0.13	-1.25	DOWN
Sept11	Sept11	2.3e-34	51.8	124	0.198	0.43	2.7e-32	-0.23	-1.26	DOWN
Zyx	Zyx	2.2e-43	87.2	212	0.31	0.57	4e-41	-0.26	-1.28	DOWN
Odc1	Odc1	1.4e-15	24.9	60	0.114	0.24	4.2e-14	-0.13	-1.28	DOWN
Tuba1c	Tuba1c	1.6e-12	25.5	62	0.116	0.22	3.3e-11	-0.11	-1.28	DOWN
Hmgn2	Hmgn2	1.2e-20	48.5	119	0.198	0.35	6.1e-19	-0.16	-1.29	DOWN
Rilpl2	Rilpl2	8.8e-16	22.2	54	0.11	0.23	2.6e-14	-0.12	-1.29	DOWN
Tubb4b	Tubb4b	1.1e-17	75.9	186	0.272	0.42	4e-16	-0.15	-1.3	DOWN
Txndc5	Txndc5	2.1e-17	20.6	52	0.096	0.22	7.7e-16	-0.13	-1.32	DOWN
Ly6a	Ly6a	6.9e-12	70.7	177	0.2	0.3	1.3e-10	-0.1	-1.32	DOWN
Dctpp1	Dctpp1	4.7e-20	19.7	50	0.093	0.23	2.3e-18	-0.14	-1.35	DOWN
S100a10	S100a10	3.8e-57	368.1	949	0.72	0.85	1.4e-54	-0.13	-1.37	DOWN
Gimap7	Gimap7	2.4e-36	75.1	194	0.277	0.5	3e-34	-0.23	-1.37	DOWN
Cldnd1	Cldnd1	6.3e-23	20	52	0.083	0.24	3.7e-21	-0.15	-1.38	DOWN
AW112010	AW112010	6.5e-69	371.6	979	0.696	0.85	4.5e-66	-0.16	-1.4	DOWN
Gng2	Gng2	5.5e-28	36.5	96	0.161	0.36	4.6e-26	-0.19	-1.4	DOWN
Smc2	Smc2	8.8e-20	35.8	94	0.131	0.28	4.1e-18	-0.15	-1.4	DOWN
Ccdc50	Ccdc50	3.1e-18	17.2	46	0.083	0.21	1.2e-16	-0.13	-1.43	DOWN
Il18r1	Il18r1	4.1e-24	40	108	0.147	0.32	2.6e-22	-0.17	-1.44	DOWN
Nkg7	Nkg7	4.6e-71	451.1	1233	0.75	0.84	4.3e-68	-0.089	-1.45	DOWN
Txn1	Txn1	2.9e-58	111.4	305	0.39	0.64	1.1e-55	-0.25	-1.45	DOWN
Rrm1	Rrm1	3e-19	17.8	49	0.079	0.21	1.3e-17	-0.13	-1.47	DOWN
Eomes	Eomes	1.9e-28	34.9	98	0.105	0.29	1.7e-26	-0.18	-1.5	DOWN
S100a11	S100a11	3.6e-49	113.3	328	0.407	0.63	9.6e-47	-0.22	-1.53	DOWN
Efhd2	Efhd2	6.7e-41	38.9	119	0.164	0.41	1.1e-38	-0.24	-1.61	DOWN
Dut	Dut	1.1e-28	41.4	129	0.165	0.35	9.7e-27	-0.19	-1.63	DOWN
Atxn1	Atxn1	1.7e-24	25.7	79	0.112	0.28	1.1e-22	-0.16	-1.63	DOWN
Car2	Car2	3.5e-14	34.1	105	0.103	0.21	8.8e-13	-0.11	-1.63	DOWN
H2afz	H2afz	9.3e-73	270.3	841	0.657	0.82	9.8e-70	-0.16	-1.64	DOWN
Id2	Id2	3e-36	96.3	305	0.265	0.49	3.7e-34	-0.22	-1.66	DOWN
Cenpa	Cenpa	1.3e-10	31.1	98	0.137	0.23	2.2e-09	-0.092	-1.66	DOWN
Cd7	Cd7	1.4e-18	86.4	274	0.271	0.42	5.8e-17	-0.15	-1.67	DOWN
Prr13	Prr13	7.3e-52	44.3	149	0.184	0.46	2.1e-49	-0.28	-1.75	DOWN
H2afx	H2afx	4.2e-15	30.2	104	0.134	0.26	1.2e-13	-0.12	-1.79	DOWN
Mcm5	Mcm5	6.3e-24	16.8	59	0.077	0.23	4e-22	-0.15	-1.81	DOWN
Hopx	Hopx	9.6e-51	39.3	141	0.157	0.43	2.7e-48	-0.27	-1.84	DOWN
Ahnak	Ahnak	1.3e-61	129	482	0.323	0.61	5.8e-59	-0.28	-1.9	DOWN
Ybx3	Ybx3	1.8e-44	27.4	102	0.12	0.36	3.6e-42	-0.24	-1.9	DOWN
1700025G04Rik	1700025G04Rik	7.3e-28	14.4	54	0.059	0.22	6e-26	-0.16	-1.91	DOWN
Bcl2a1b	Bcl2a1b	1.6e-25	16.9	65	0.073	0.23	1.1e-23	-0.15	-1.93	DOWN
Rgs1	Rgs1	6.5e-22	16.9	65	0.071	0.21	3.5e-20	-0.14	-1.94	DOWN
Cd44	Cd44	9.9e-38	15.3	63	0.07	0.28	1.3e-35	-0.21	-2.05	DOWN
Pglyrp1	Pglyrp1	9.7e-55	28.9	126	0.127	0.4	3.2e-52	-0.27	-2.13	DOWN
Il2rb	Il2rb	2.6e-96	76.2	338	0.255	0.63	9.6e-93	-0.37	-2.15	DOWN
Myo1f	Myo1f	1.4e-45	19.4	86	0.093	0.33	2.9e-43	-0.24	-2.15	DOWN
Chsy1	Chsy1	1.1e-37	15.4	68	0.07	0.27	1.5e-35	-0.2	-2.15	DOWN
Ezh2	Ezh2	7.6e-38	16.9	80	0.071	0.27	1e-35	-0.2	-2.24	DOWN
Cks2	Cks2	2.6e-23	14.4	71	0.067	0.21	1.6e-21	-0.14	-2.3	DOWN
Slamf7	Slamf7	8.8e-51	17.1	86	0.04	0.27	2.5e-48	-0.23	-2.32	DOWN
Nsd2	Nsd2	2.1e-35	12	60	0.054	0.24	2.5e-33	-0.18	-2.32	DOWN
Lig1	Lig1	5.3e-30	12.2	63	0.052	0.21	5e-28	-0.16	-2.37	DOWN
Lmnb1	Lmnb1	5.5e-38	16.7	91	0.073	0.27	7.4e-36	-0.2	-2.44	DOWN
Ikzf2	Ikzf2	3.4e-34	34.8	198	0.104	0.3	3.9e-32	-0.19	-2.51	DOWN
Ctla2a	Ctla2a	5.6e-70	45.7	267	0.094	0.41	4.8e-67	-0.31	-2.54	DOWN
Cd160	Cd160	2.5e-40	18	106	0.076	0.29	4e-38	-0.21	-2.55	DOWN
Hmgb2	Hmgb2	6e-63	152.9	914	0.448	0.67	2.8e-60	-0.22	-2.58	DOWN
Serpinb6b	Serpinb6b	2e-37	13.5	81	0.064	0.26	2.6e-35	-0.19	-2.59	DOWN
Itgb1	Itgb1	2e-71	42.2	277	0.169	0.49	2e-68	-0.32	-2.71	DOWN
Acot7	Acot7	4.3e-41	6.6	50	0.036	0.23	7.1e-39	-0.19	-2.91	DOWN
Lgals1	Lgals1	6.9e-92	128.8	1022	0.317	0.65	2e-88	-0.33	-2.99	DOWN
Cxcr3	Cxcr3	1.4e-68	14.1	112	0.056	0.35	8.7e-66	-0.3	-2.99	DOWN
Il18rap	Il18rap	6.2e-39	8.2	67	0.033	0.22	9.1e-37	-0.18	-3.02	DOWN
Plek	Plek	8.2e-49	9.4	83	0.04	0.26	2.1e-46	-0.22	-3.14	DOWN
Ptms	Ptms	3.8e-48	8.2	81	0.035	0.25	9.6e-46	-0.22	-3.29	DOWN
Anxa2	Anxa2	2.1e-85	15.6	208	0.069	0.41	4.4e-82	-0.34	-3.73	DOWN
Mki67	Mki67	4.6e-38	16.7	230	0.057	0.25	6.2e-36	-0.19	-3.78	DOWN
Top2a	Top2a	5.8e-37	13.2	187	0.048	0.23	7.4e-35	-0.18	-3.82	DOWN
Tbx21	Tbx21	3.4e-47	3.9	56	0.019	0.22	8.2e-45	-0.2	-3.85	DOWN
Stmn1	Stmn1	1.3e-44	17.3	274	0.072	0.29	2.6e-42	-0.21	-3.98	DOWN
Ccl5	Ccl5	2.1e-157	228.7	7857	0.112	0.61	3.1e-153	-0.5	-5.1	DOWN
Klrk1	Klrk1	1e-51	4	153	0.014	0.23	2.9e-49	-0.21	-5.27	DOWN
Lgals3	Lgals3	1e-46	2.7	135	0.01	0.2	2.4e-44	-0.19	-5.65	DOWN
S100a6	S100a6	6.6e-122	14.8	900	0.05	0.48	4.9e-118	-0.43	-5.93	DOWN
S100a4	S100a4	2.4e-77	5.4	515	0.017	0.31	3.6e-74	-0.3	-6.58	DOWN

## Sheet: Cluster 2
	gene_name	pval	exp_case	exp_control	pct_case	pct_control	adjust_pval	pct_diff	rawLog2FoldChange	direction
Trdc	Trdc	9e-36	410	132	0.292	0.111	1.9e-32	0.1806	1.63	UP
Trgv2	Trgv2	1.9e-26	81	27	0.214	0.077	9.2e-24	0.1368	1.57	UP
Tcrg-C2	Tcrg-C2	1.6e-34	117	40	0.27	0.096	2.5e-31	0.1738	1.53	UP
Klra6	Klra6	7.4e-29	73	25	0.205	0.066	4.7e-26	0.1393	1.52	UP
Tcrg-C4	Tcrg-C4	2.7e-28	108	38	0.251	0.099	1.6e-25	0.1522	1.51	UP
Samd3	Samd3	1.9e-33	104	47	0.397	0.194	1.9e-30	0.2031	1.16	UP
Ikzf2	Ikzf2	2.7e-31	377	173	0.477	0.282	2.1e-28	0.1953	1.12	UP
Klra7	Klra7	3.2e-23	133	61	0.25	0.107	9.6e-21	0.1433	1.12	UP
Gzmm	Gzmm	2.8e-17	74	34	0.225	0.108	3.2e-15	0.1167	1.1	UP
Ttc28	Ttc28	7.5e-11	50	25	0.211	0.123	3.2e-09	0.0875	1	UP
Xcl1	Xcl1	7.8e-36	229	116	0.418	0.196	1.9e-32	0.222	0.99	UP
1700025G04Rik	1700025G04Rik	1.1e-22	106	56	0.395	0.23	3e-20	0.1648	0.93	UP
Ctla2a	Ctla2a	4.9e-42	494	269	0.665	0.421	2.4e-38	0.2441	0.88	UP
Klrc2	Klrc2	7.3e-16	154	84	0.337	0.202	6.6e-14	0.1352	0.87	UP
Lrrk1	Lrrk1	1.3e-09	51	28	0.212	0.129	4.8e-08	0.0827	0.87	UP
Cd160	Cd160	1.8e-15	177	100	0.424	0.289	1.5e-13	0.135	0.82	UP
Dennd4a	Dennd4a	2.9e-14	145	83	0.423	0.296	2e-12	0.1272	0.81	UP
Neurl3	Neurl3	8.9e-12	123	70	0.382	0.272	4.4e-10	0.1098	0.81	UP
Klre1	Klre1	4.9e-21	183	105	0.326	0.167	1.1e-18	0.1589	0.8	UP
Dusp5	Dusp5	2.1e-05	67	39	0.208	0.15	0.00034	0.0577	0.8	UP
Il4ra	Il4ra	3.4e-17	93	54	0.385	0.247	3.9e-15	0.138	0.79	UP
Nsg2	Nsg2	6e-21	151	88	0.496	0.331	1.3e-18	0.1655	0.77	UP
Bcl2	Bcl2	2.8e-51	637	376	0.839	0.627	4.2e-47	0.2121	0.76	UP
Itm2a	Itm2a	1.9e-08	57	34	0.228	0.149	5.9e-07	0.0788	0.76	UP
Txk	Txk	2.3e-40	460	275	0.794	0.617	8.4e-37	0.1766	0.74	UP
Mfsd10	Mfsd10	0.0079	58	34	0.209	0.179	0.048	0.0298	0.74	UP
Peak1	Peak1	6.3e-18	133	80	0.462	0.315	8.3e-16	0.1467	0.72	UP
Mirt1	Mirt1	2.3e-12	104	63	0.356	0.239	1.3e-10	0.1169	0.72	UP
Il2rb	Il2rb	3.5e-44	543	332	0.832	0.63	2.6e-40	0.2025	0.71	UP
N4bp2	N4bp2	5.7e-06	69	42	0.262	0.2	0.00011	0.0618	0.71	UP
Klrc1	Klrc1	2.2e-05	101	62	0.217	0.157	0.00034	0.0604	0.71	UP
Nfkbiz	Nfkbiz	0.0012	61	38	0.212	0.168	0.011	0.0438	0.71	UP
Wwp1	Wwp1	2.2e-09	58	36	0.264	0.174	7.7e-08	0.0895	0.7	UP
Sidt1	Sidt1	1.7e-24	191	119	0.592	0.401	5.6e-22	0.1911	0.69	UP
Kbtbd11	Kbtbd11	1e-19	193	120	0.565	0.407	1.7e-17	0.1583	0.69	UP
Rras2	Rras2	8.6e-11	83	52	0.337	0.232	3.7e-09	0.1053	0.69	UP
Parp8	Parp8	1e-05	57	35	0.216	0.153	0.00017	0.0626	0.68	UP
Myb	Myb	3.9e-05	91	57	0.228	0.171	0.00057	0.0572	0.68	UP
Sell	Sell	9.3e-33	506	318	0.774	0.583	8.5e-30	0.1907	0.67	UP
Bcl2l11	Bcl2l11	3.7e-07	91	58	0.3	0.221	9.1e-06	0.0793	0.65	UP
Ly6c2	Ly6c2	4.9e-34	950	611	0.735	0.514	6e-31	0.2205	0.64	UP
Hdac4	Hdac4	6.7e-07	75	48	0.295	0.221	1.5e-05	0.0738	0.64	UP
Cd7	Cd7	1e-15	411	265	0.564	0.414	8.9e-14	0.1499	0.63	UP
Tnfsf8	Tnfsf8	1.6e-11	69	45	0.296	0.187	7.3e-10	0.1095	0.63	UP
Adora2a	Adora2a	0.00035	48	31	0.204	0.158	0.0037	0.0458	0.63	UP
Coro2a	Coro2a	0.0021	53	34	0.2	0.159	0.016	0.0408	0.62	UP
Arap2	Arap2	1.4e-10	140	92	0.455	0.351	6e-09	0.104	0.61	UP
Zbtb20	Zbtb20	1.4e-09	196	129	0.448	0.342	4.9e-08	0.1059	0.61	UP
Mylip	Mylip	1.7e-08	67	44	0.274	0.183	5.2e-07	0.0906	0.61	UP
Clec2i	Clec2i	4.7e-08	97	64	0.357	0.269	1.4e-06	0.088	0.61	UP
Junb	Junb	0.00016	464	304	0.582	0.534	0.0019	0.0481	0.61	UP
Plcb2	Plcb2	4e-05	47	31	0.213	0.157	0.00058	0.0564	0.6	UP
Ms4a4c	Ms4a4c	1.1e-13	154	102	0.447	0.316	7.3e-12	0.1307	0.59	UP
Galnt10	Galnt10	9.5e-06	45	30	0.212	0.149	0.00017	0.0633	0.58	UP
Tmem108	Tmem108	1.4e-05	43	29	0.202	0.14	0.00023	0.0622	0.58	UP
Stat4	Stat4	1.7e-16	212	142	0.614	0.485	1.8e-14	0.129	0.57	UP
Zfp652	Zfp652	4.1e-08	97	66	0.368	0.278	1.2e-06	0.09	0.57	UP
Ifngr1	Ifngr1	2.9e-21	272	184	0.683	0.527	6.4e-19	0.1559	0.56	UP
Ssh2	Ssh2	7.7e-20	266	181	0.683	0.543	1.3e-17	0.1396	0.56	UP
Cbx7	Cbx7	6.3e-05	61	41	0.246	0.188	0.00086	0.0579	0.56	UP
Filip1l	Filip1l	7.7e-05	63	43	0.246	0.188	0.001	0.0579	0.56	UP
Il7r	Il7r	3.1e-20	536	365	0.701	0.523	5.9e-18	0.1781	0.55	UP
Tcf12	Tcf12	1.1e-11	159	109	0.526	0.413	5.5e-10	0.1135	0.55	UP
Arid5a	Arid5a	1.7e-10	107	73	0.409	0.301	6.9e-09	0.1084	0.55	UP
Eomes	Eomes	5e-15	139	96	0.422	0.276	4e-13	0.1456	0.54	UP
Cd44	Cd44	8e-07	91	63	0.363	0.286	1.8e-05	0.0771	0.53	UP
Arhgef3	Arhgef3	1.4e-06	98	68	0.373	0.3	3.1e-05	0.0735	0.53	UP
Jun	Jun	0.00013	109	76	0.3	0.244	0.0015	0.0562	0.53	UP
Ppp1r15a	Ppp1r15a	0.00054	82	57	0.269	0.217	0.0054	0.052	0.53	UP
Trim12a	Trim12a	6.6e-14	226	157	0.622	0.504	4.5e-12	0.1175	0.52	UP
Rgs3	Rgs3	2e-06	83	58	0.338	0.265	4.2e-05	0.0726	0.52	UP
Cd69	Cd69	3.1e-06	201	142	0.481	0.407	6.2e-05	0.0737	0.5	UP
Elmsan1	Elmsan1	0.00033	44	31	0.201	0.152	0.0036	0.0491	0.5	UP
Tm6sf1	Tm6sf1	4.7e-11	157	112	0.501	0.385	2.1e-09	0.1163	0.49	UP
Gm20696	Gm20696	2.7e-05	45	32	0.207	0.146	0.00041	0.0609	0.49	UP
Iqsec1	Iqsec1	0.00032	49	35	0.234	0.182	0.0034	0.0517	0.49	UP
Ubash3b	Ubash3b	0.0021	75	53	0.274	0.23	0.017	0.0438	0.49	UP
Mef2a	Mef2a	3.3e-08	114	82	0.431	0.343	9.9e-07	0.0879	0.48	UP
Pag1	Pag1	5.9e-05	96	69	0.358	0.295	0.0008	0.0632	0.48	UP
Ppp3cc	Ppp3cc	5.9e-05	71	51	0.314	0.256	0.00081	0.0581	0.48	UP
Kdm6b	Kdm6b	7.9e-05	79	56	0.273	0.213	0.001	0.0597	0.48	UP
Crtam	Crtam	0.00016	55	39	0.224	0.168	0.0019	0.0564	0.48	UP
Crybg1	Crybg1	0.00016	50	35	0.225	0.17	0.0019	0.0553	0.48	UP
Emb	Emb	5.3e-12	446	322	0.745	0.645	2.7e-10	0.0997	0.47	UP
Pitpnc1	Pitpnc1	2.4e-09	168	122	0.525	0.422	8.3e-08	0.1025	0.47	UP
Ifitm10	Ifitm10	1.1e-07	60	43	0.265	0.178	2.9e-06	0.0869	0.47	UP
Socs1	Socs1	0.00012	52	38	0.232	0.174	0.0015	0.0581	0.47	UP
Treml2	Treml2	5.8e-05	57	41	0.242	0.18	0.0008	0.0623	0.46	UP
Pim2	Pim2	0.00014	54	39	0.228	0.172	0.0016	0.0562	0.46	UP
Ifnar1	Ifnar1	0.0013	84	61	0.32	0.275	0.011	0.0446	0.46	UP
Pdcd4	Pdcd4	1.6e-21	616	451	0.854	0.753	3.7e-19	0.101	0.45	UP
Klrd1	Klrd1	8.6e-19	379	278	0.707	0.54	1.3e-16	0.1668	0.45	UP
Il18rap	Il18rap	2.9e-09	90	66	0.325	0.224	9.9e-08	0.1011	0.45	UP
Dgkd	Dgkd	4.4e-06	89	65	0.368	0.295	8.4e-05	0.0727	0.45	UP
Cxcr4	Cxcr4	1.2e-05	59	43	0.248	0.181	0.0002	0.0667	0.45	UP
Rpgrip1	Rpgrip1	0.00017	67	49	0.28	0.223	0.002	0.0567	0.45	UP
Lta4h	Lta4h	0.001	106	78	0.383	0.346	0.0095	0.0372	0.45	UP
Cln3	Cln3	0.0022	46	34	0.206	0.164	0.017	0.0415	0.45	UP
Klhl6	Klhl6	8.6e-09	151	111	0.498	0.401	2.8e-07	0.0971	0.44	UP
Cbl	Cbl	2.1e-07	185	137	0.559	0.49	5.3e-06	0.0687	0.44	UP
Rnf138	Rnf138	1.8e-06	92	68	0.385	0.308	3.8e-05	0.0765	0.44	UP
Ppp1r9b	Ppp1r9b	1.9e-05	84	62	0.35	0.282	0.00031	0.0678	0.44	UP
Usp48	Usp48	1.9e-05	107	79	0.411	0.345	0.00031	0.0658	0.44	UP
Uhrf1bp1l	Uhrf1bp1l	8.5e-05	52	38	0.24	0.183	0.0011	0.0571	0.44	UP
Zfp318	Zfp318	0.00011	47	34	0.206	0.151	0.0014	0.0552	0.44	UP
Slc25a36	Slc25a36	0.00025	55	40	0.24	0.186	0.0028	0.054	0.44	UP
Rasa2	Rasa2	0.0013	99	73	0.354	0.313	0.011	0.0408	0.44	UP
Aff4	Aff4	0.0072	68	50	0.263	0.227	0.045	0.036	0.44	UP
Gramd3	Gramd3	3.8e-08	165	122	0.494	0.406	1.1e-06	0.0883	0.43	UP
Igf2r	Igf2r	0.00025	62	46	0.28	0.226	0.0028	0.054	0.43	UP
Kdm5b	Kdm5b	0.0006	59	44	0.237	0.183	0.0059	0.0536	0.43	UP
Kri1	Kri1	0.0053	54	40	0.236	0.197	0.035	0.0395	0.43	UP
Pik3ip1	Pik3ip1	1.8e-07	110	82	0.384	0.29	4.8e-06	0.0939	0.42	UP
Lncpint	Lncpint	6.9e-06	63	47	0.268	0.195	0.00012	0.0725	0.42	UP
Zfhx2	Zfhx2	1.3e-05	58	44	0.25	0.181	0.00022	0.0692	0.42	UP
Chsy1	Chsy1	4.1e-05	95	71	0.357	0.287	0.00059	0.0701	0.42	UP
Lyst	Lyst	6.2e-05	128	96	0.418	0.357	0.00084	0.0607	0.42	UP
Psen2	Psen2	0.00022	65	49	0.277	0.22	0.0025	0.0568	0.42	UP
Fcer1g	Fcer1g	1.4e-12	172	130	0.269	0.153	8.1e-11	0.1156	0.41	UP
Pde7a	Pde7a	2.6e-10	165	124	0.539	0.431	1.1e-08	0.1076	0.41	UP
Pim1	Pim1	5.7e-05	175	131	0.456	0.393	0.00079	0.0629	0.41	UP
Armc7	Armc7	0.0004	60	45	0.252	0.199	0.0042	0.0528	0.41	UP
Hmg20a	Hmg20a	0.0024	48	37	0.22	0.179	0.018	0.0408	0.41	UP
Elovl5	Elovl5	0.0067	58	44	0.259	0.222	0.043	0.0367	0.41	UP
Gpr183	Gpr183	2.2e-06	134	101	0.39	0.312	4.5e-05	0.0779	0.4	UP
Tbc1d1	Tbc1d1	2.9e-05	113	85	0.428	0.363	0.00044	0.0654	0.4	UP
Atp1b1	Atp1b1	0.0033	53	40	0.219	0.178	0.024	0.0409	0.4	UP
Golgb1	Golgb1	0.0065	87	66	0.308	0.274	0.041	0.0337	0.4	UP
Satb1	Satb1	4e-18	377	287	0.757	0.586	5.6e-16	0.1711	0.39	UP
Cdc42ep3	Cdc42ep3	0.00011	80	61	0.313	0.253	0.0014	0.0597	0.39	UP
Malt1	Malt1	3.4e-05	134	103	0.464	0.393	0.00051	0.0709	0.38	UP
Ehd3	Ehd3	6.6e-05	75	57	0.32	0.256	0.0009	0.0641	0.38	UP
Plekha5	Plekha5	0.0016	55	42	0.238	0.193	0.014	0.0446	0.38	UP
Mbnl2	Mbnl2	0.0061	68	52	0.286	0.248	0.039	0.0385	0.38	UP
Klf6	Klf6	0.00026	167	129	0.462	0.409	0.0028	0.0526	0.37	UP
Fam46a	Fam46a	3e-05	101	78	0.348	0.276	0.00045	0.0721	0.36	UP
Itch	Itch	0.0023	110	86	0.4	0.36	0.018	0.04	0.36	UP
Pik3r5	Pik3r5	0.0034	57	45	0.247	0.202	0.025	0.0452	0.36	UP
Tcf7	Tcf7	1.4e-11	330	259	0.731	0.595	6.6e-10	0.1356	0.35	UP
Il18r1	Il18r1	4e-07	135	106	0.412	0.318	9.8e-06	0.0941	0.35	UP
Zfp36l1	Zfp36l1	4.1e-07	240	189	0.586	0.509	1e-05	0.0768	0.35	UP
Rcsd1	Rcsd1	3.1e-05	192	151	0.563	0.512	0.00046	0.0507	0.35	UP
Traf1	Traf1	7.9e-05	168	132	0.507	0.447	0.001	0.0598	0.35	UP
Sorl1	Sorl1	8.5e-05	114	90	0.424	0.362	0.0011	0.0625	0.35	UP
Atp8b4	Atp8b4	0.0002	103	81	0.372	0.312	0.0023	0.0599	0.35	UP
Id3	Id3	0.00027	97	76	0.293	0.231	0.003	0.0623	0.35	UP
St3gal6	St3gal6	0.00038	67	52	0.302	0.245	0.0039	0.0566	0.35	UP
Gm19585	Gm19585	0.0012	51	40	0.236	0.187	0.011	0.0489	0.35	UP
St8sia4	St8sia4	0.0014	123	97	0.396	0.348	0.012	0.0481	0.35	UP
Hvcn1	Hvcn1	0.0019	76	59	0.306	0.257	0.015	0.049	0.35	UP
Lax1	Lax1	0.0066	68	54	0.283	0.244	0.042	0.0392	0.35	UP
Atp11b	Atp11b	6.6e-07	222	175	0.626	0.558	1.5e-05	0.0679	0.34	UP
Tcp11l2	Tcp11l2	0.00046	64	51	0.272	0.214	0.0047	0.0576	0.34	UP
Cyth1	Cyth1	0.0012	89	71	0.363	0.313	0.011	0.0498	0.34	UP
Padi2	Padi2	0.0047	43	34	0.205	0.164	0.032	0.041	0.34	UP
Cirbp	Cirbp	0.0059	88	69	0.34	0.3	0.038	0.0405	0.34	UP
Ier2	Ier2	0.0064	155	122	0.441	0.41	0.041	0.0306	0.34	UP
Tanc1	Tanc1	0.008	46	37	0.2	0.163	0.048	0.0371	0.34	UP
Zcchc11	Zcchc11	3.3e-08	245	195	0.658	0.565	9.9e-07	0.0926	0.33	UP
Smg1	Smg1	2.8e-05	164	131	0.527	0.465	0.00043	0.0619	0.33	UP
Jaml	Jaml	3.3e-05	78	62	0.303	0.231	0.0005	0.0718	0.33	UP
Ppm1h	Ppm1h	0.00017	93	74	0.367	0.303	0.002	0.0643	0.33	UP
Rabgap1l	Rabgap1l	0.00027	137	108	0.461	0.408	0.003	0.0532	0.33	UP
Rps12-ps3	Rps12-ps3	0.0064	75	60	0.325	0.288	0.041	0.037	0.33	UP
Zkscan3	Zkscan3	0.0077	73	58	0.296	0.255	0.047	0.0406	0.33	UP
Gimap4	Gimap4	5.4e-16	683	548	0.899	0.83	5.1e-14	0.0693	0.32	UP
Zfp36l2	Zfp36l2	7.3e-11	459	369	0.803	0.738	3.2e-09	0.0652	0.32	UP
Evl	Evl	4.1e-09	256	205	0.691	0.584	1.4e-07	0.1072	0.32	UP
Cmah	Cmah	1.6e-07	206	165	0.564	0.471	4.1e-06	0.0926	0.32	UP
Cnot6l	Cnot6l	3.7e-06	230	185	0.646	0.59	7.1e-05	0.0559	0.32	UP
Gm26740	Gm26740	4.9e-06	167	134	0.531	0.454	9.2e-05	0.077	0.32	UP
Il6st	Il6st	0.00053	66	53	0.285	0.226	0.0053	0.059	0.32	UP
Fchsd2	Fchsd2	0.0018	71	57	0.293	0.242	0.015	0.0508	0.32	UP
Cblb	Cblb	0.0018	112	90	0.395	0.349	0.015	0.0456	0.32	UP
Gpr174	Gpr174	0.0019	87	70	0.342	0.298	0.015	0.0435	0.32	UP
Riok1	Riok1	0.0024	88	70	0.369	0.325	0.019	0.0437	0.32	UP
mt-Nd2	mt-Nd2	2e-34	2836	2289	0.995	0.992	2.9e-31	0.0034	0.31	UP
Hcst	Hcst	8.1e-16	611	493	0.875	0.827	7.2e-14	0.0484	0.31	UP
Ctsw	Ctsw	2.6e-10	313	253	0.715	0.606	1.1e-08	0.1086	0.31	UP
Zbtb7a	Zbtb7a	0.0018	156	126	0.504	0.472	0.015	0.0321	0.31	UP
Pde3b	Pde3b	0.0043	87	70	0.324	0.279	0.03	0.0455	0.31	UP
Herc3	Herc3	0.0063	46	37	0.22	0.179	0.041	0.0408	0.31	UP
Btg1	Btg1	1.9e-11	1255	1021	0.944	0.913	8.6e-10	0.0307	0.3	UP
Gm2682	Gm2682	1.7e-08	303	246	0.689	0.602	5.3e-07	0.0873	0.3	UP
Itpkb	Itpkb	1.4e-06	250	203	0.659	0.606	3.1e-05	0.0526	0.3	UP
Apobec3	Apobec3	2.8e-06	298	242	0.708	0.631	5.6e-05	0.0774	0.3	UP
Chd7	Chd7	4.5e-06	138	112	0.496	0.416	8.5e-05	0.0798	0.3	UP
Map4k4	Map4k4	8.6e-06	190	155	0.586	0.523	0.00015	0.0626	0.3	UP
Ugcg	Ugcg	5.8e-05	191	155	0.561	0.51	0.0008	0.0508	0.3	UP
Jmjd1c	Jmjd1c	0.0012	129	105	0.449	0.4	0.011	0.0486	0.3	UP
Il21r	Il21r	0.0034	92	75	0.369	0.322	0.025	0.0474	0.3	UP
Stap1	Stap1	0.0044	98	79	0.374	0.329	0.031	0.045	0.3	UP
Gimap6	Gimap6	3.3e-11	554	454	0.877	0.832	1.5e-09	0.0446	0.29	UP
Ptpn22	Ptpn22	2.1e-06	251	205	0.666	0.605	4.4e-05	0.0612	0.29	UP
Slc38a1	Slc38a1	6e-05	187	152	0.572	0.52	0.00082	0.0523	0.29	UP
Ubald2	Ubald2	7.9e-05	97	79	0.398	0.329	0.001	0.069	0.29	UP
Cyfip2	Cyfip2	0.0011	147	120	0.506	0.46	0.0098	0.0457	0.29	UP
Efhd2	Efhd2	0.0011	143	117	0.47	0.419	0.01	0.0512	0.29	UP
Klf7	Klf7	0.0041	60	49	0.252	0.207	0.029	0.045	0.29	UP
Sh2d3c	Sh2d3c	0.0045	72	59	0.312	0.266	0.031	0.0456	0.29	UP
Trp53inp1	Trp53inp1	0.0054	81	66	0.32	0.275	0.036	0.0452	0.29	UP
Ubr2	Ubr2	0.0059	97	79	0.377	0.338	0.039	0.0391	0.29	UP
Jak1	Jak1	1.2e-14	690	567	0.917	0.888	9.1e-13	0.0295	0.28	UP
Rapgef6	Rapgef6	4.3e-08	324	268	0.739	0.673	1.3e-06	0.0664	0.28	UP
Pik3cd	Pik3cd	1.2e-05	197	163	0.603	0.532	0.0002	0.0712	0.28	UP
Ptpn6	Ptpn6	0.00061	183	151	0.515	0.475	0.006	0.0405	0.28	UP
Hipk1	Hipk1	0.00086	153	126	0.498	0.452	0.008	0.0456	0.28	UP
Gramd4	Gramd4	0.005	70	58	0.306	0.261	0.034	0.0454	0.28	UP
Gimap3	Gimap3	1.1e-11	552	457	0.875	0.832	5.5e-10	0.0426	0.27	UP
mt-Nd5	mt-Nd5	2.2e-09	512	425	0.84	0.798	7.7e-08	0.0423	0.27	UP
Mxd4	Mxd4	0.0055	122	101	0.401	0.359	0.037	0.0421	0.27	UP
Zfp638	Zfp638	0.0081	134	111	0.461	0.422	0.049	0.0385	0.27	UP
Ptprc	Ptprc	3.3e-12	1754	1460	0.991	0.983	1.8e-10	0.0078	0.26	UP
Tecpr1	Tecpr1	6.7e-05	178	148	0.554	0.49	0.00091	0.0642	0.26	UP
Gimap5	Gimap5	8.2e-05	212	178	0.616	0.561	0.0011	0.0548	0.26	UP
Arid4b	Arid4b	0.0019	165	138	0.523	0.482	0.015	0.0411	0.26	UP
Klrk1	Klrk1	0.0031	184	154	0.276	0.225	0.023	0.0506	0.26	UP
Kdm2a	Kdm2a	0.0035	127	106	0.45	0.405	0.025	0.0454	0.26	UP
Etnk1	Etnk1	0.00021	150	126	0.516	0.451	0.0024	0.0646	0.25	UP
Adcy7	Adcy7	0.0015	139	117	0.494	0.444	0.013	0.0505	0.25	UP
Sesn3	Sesn3	0.0023	121	102	0.447	0.394	0.018	0.0529	0.25	UP
Prkch	Prkch	0.0067	168	142	0.533	0.504	0.042	0.0285	0.25	UP
Cox7c	Cox7c	1.3e-09	439	523	0.834	0.877	4.7e-08	-0.043	-0.25	DOWN
Hnrnpa3	Hnrnpa3	2.9e-06	369	440	0.782	0.801	5.9e-05	-0.0194	-0.25	DOWN
Taf10	Taf10	1.1e-05	207	247	0.637	0.678	0.00018	-0.0414	-0.25	DOWN
Hdac1	Hdac1	0.00013	85	101	0.348	0.417	0.0016	-0.0687	-0.25	DOWN
Arhgdia	Arhgdia	0.00016	209	250	0.628	0.667	0.0019	-0.0388	-0.25	DOWN
Pspc1	Pspc1	0.00057	32	38	0.15	0.209	0.0057	-0.0586	-0.25	DOWN
Flna	Flna	0.00078	183	218	0.534	0.59	0.0074	-0.0561	-0.25	DOWN
Mrpl57	Mrpl57	0.00084	93	110	0.372	0.443	0.0079	-0.071	-0.25	DOWN
Dph3	Dph3	0.00099	57	68	0.246	0.315	0.0091	-0.0688	-0.25	DOWN
Sub1	Sub1	0.0017	529	630	0.864	0.852	0.014	0.0117	-0.25	DOWN
Dazap1	Dazap1	0.0042	72	86	0.31	0.366	0.03	-0.0563	-0.25	DOWN
Psmd11	Psmd11	0.0053	77	91	0.344	0.4	0.035	-0.0559	-0.25	DOWN
Map2k2	Map2k2	0.0064	94	111	0.386	0.441	0.041	-0.0554	-0.25	DOWN
H3f3b	H3f3b	1.2e-08	747	891	0.92	0.93	3.9e-07	-0.0096	-0.26	DOWN
Cox6b1	Cox6b1	3.9e-06	289	345	0.765	0.776	7.6e-05	-0.0106	-0.26	DOWN
Gnb1	Gnb1	0.00019	107	128	0.42	0.494	0.0022	-0.074	-0.26	DOWN
Mrpl42	Mrpl42	0.00023	64	76	0.285	0.36	0.0026	-0.075	-0.26	DOWN
Spcs2	Spcs2	0.00031	159	191	0.554	0.607	0.0033	-0.0535	-0.26	DOWN
Krtcap2	Krtcap2	0.0004	193	232	0.615	0.662	0.0042	-0.0466	-0.26	DOWN
Dnajc19	Dnajc19	0.00061	57	68	0.258	0.327	0.006	-0.0689	-0.26	DOWN
Baz1b	Baz1b	0.00061	120	144	0.418	0.483	0.006	-0.0654	-0.26	DOWN
Fcf1	Fcf1	0.00077	42	51	0.207	0.272	0.0073	-0.0647	-0.26	DOWN
Ddx39b	Ddx39b	0.001	152	182	0.542	0.583	0.0093	-0.0408	-0.26	DOWN
Keap1	Keap1	0.0012	44	52	0.195	0.253	0.011	-0.0578	-0.26	DOWN
Ilf2	Ilf2	0.0013	63	75	0.273	0.336	0.011	-0.0628	-0.26	DOWN
Mrps26	Mrps26	0.0013	59	71	0.258	0.326	0.012	-0.0678	-0.26	DOWN
Srebf2	Srebf2	0.0014	41	49	0.192	0.25	0.012	-0.0576	-0.26	DOWN
Cacybp	Cacybp	0.0016	87	104	0.36	0.425	0.014	-0.0651	-0.26	DOWN
Uchl3	Uchl3	0.0024	47	56	0.225	0.284	0.019	-0.0588	-0.26	DOWN
Mrpl41	Mrpl41	0.0029	44	52	0.206	0.264	0.022	-0.0578	-0.26	DOWN
Mtpn	Mtpn	0.0031	84	100	0.361	0.417	0.023	-0.0562	-0.26	DOWN
Khsrp	Khsrp	0.0039	41	49	0.196	0.25	0.028	-0.0541	-0.26	DOWN
Serp1	Serp1	0.0042	71	85	0.305	0.364	0.03	-0.0586	-0.26	DOWN
Nme1	Nme1	0.0059	209	251	0.61	0.625	0.038	-0.0148	-0.26	DOWN
Med13l	Med13l	0.0073	39	47	0.173	0.218	0.045	-0.0446	-0.26	DOWN
Slamf6	Slamf6	0.0073	155	185	0.457	0.499	0.045	-0.0422	-0.26	DOWN
Ccdc59	Ccdc59	0.0081	70	84	0.296	0.353	0.049	-0.0566	-0.26	DOWN
Usmg5	Usmg5	3e-05	125	151	0.461	0.533	0.00046	-0.0718	-0.27	DOWN
Snx3	Snx3	4.4e-05	104	126	0.413	0.482	0.00063	-0.0689	-0.27	DOWN
Snrpb	Snrpb	4.9e-05	189	228	0.613	0.658	0.00069	-0.0449	-0.27	DOWN
Gdi2	Gdi2	8.2e-05	150	181	0.523	0.58	0.0011	-0.0566	-0.27	DOWN
Itga4	Itga4	0.00011	392	472	0.564	0.632	0.0013	-0.0682	-0.27	DOWN
Mrpl33	Mrpl33	0.00013	171	206	0.574	0.616	0.0016	-0.0424	-0.27	DOWN
Ube2d2a	Ube2d2a	0.00025	100	120	0.4	0.47	0.0028	-0.0703	-0.27	DOWN
Prpf40a	Prpf40a	0.00026	131	158	0.468	0.532	0.0028	-0.0643	-0.27	DOWN
Atp5k	Atp5k	0.00037	230	278	0.642	0.667	0.0039	-0.0254	-0.27	DOWN
Uqcc2	Uqcc2	0.00041	80	96	0.339	0.409	0.0042	-0.0704	-0.27	DOWN
Uchl5	Uchl5	0.00048	35	42	0.169	0.23	0.0049	-0.0612	-0.27	DOWN
Ak2	Ak2	0.00058	64	77	0.286	0.352	0.0057	-0.0661	-0.27	DOWN
Cdk2ap1	Cdk2ap1	0.00078	45	55	0.214	0.274	0.0074	-0.0598	-0.27	DOWN
Mrpl4	Mrpl4	0.00094	47	56	0.219	0.282	0.0087	-0.0632	-0.27	DOWN
Glrx5	Glrx5	0.0011	73	88	0.308	0.372	0.01	-0.0635	-0.27	DOWN
Pop5	Pop5	0.0012	78	94	0.344	0.41	0.01	-0.0664	-0.27	DOWN
Mrpl28	Mrpl28	0.0012	42	50	0.201	0.262	0.011	-0.0607	-0.27	DOWN
Nrip1	Nrip1	0.0017	86	103	0.286	0.354	0.014	-0.0677	-0.27	DOWN
Snx20	Snx20	0.002	44	53	0.2	0.256	0.016	-0.0559	-0.27	DOWN
Elof1	Elof1	0.0021	42	51	0.198	0.254	0.017	-0.0563	-0.27	DOWN
Sdhd	Sdhd	0.0026	44	53	0.21	0.263	0.02	-0.0533	-0.27	DOWN
Frmd8	Frmd8	0.0027	45	55	0.207	0.26	0.021	-0.0531	-0.27	DOWN
Ehd1	Ehd1	0.0043	33	40	0.159	0.205	0.03	-0.0459	-0.27	DOWN
Ctdspl2	Ctdspl2	0.0051	42	51	0.193	0.245	0.034	-0.0519	-0.27	DOWN
Sh3gl1	Sh3gl1	0.0054	37	45	0.177	0.224	0.036	-0.0469	-0.27	DOWN
Bst2	Bst2	0.0069	92	110	0.341	0.391	0.043	-0.05	-0.27	DOWN
Fbxl14	Fbxl14	0.0075	34	41	0.171	0.217	0.046	-0.0455	-0.27	DOWN
Arpp19	Arpp19	1.4e-06	166	201	0.558	0.635	3e-05	-0.0768	-0.28	DOWN
Uqcrq	Uqcrq	1.9e-05	201	244	0.634	0.665	0.00031	-0.0307	-0.28	DOWN
Hnrnpd	Hnrnpd	2.7e-05	169	205	0.531	0.596	0.00041	-0.0654	-0.28	DOWN
Psma5	Psma5	4.7e-05	90	110	0.378	0.458	0.00066	-0.0797	-0.28	DOWN
Raly	Raly	6.8e-05	169	205	0.579	0.617	0.00091	-0.0384	-0.28	DOWN
Dynll1	Dynll1	8.2e-05	245	297	0.664	0.7	0.0011	-0.0365	-0.28	DOWN
Uqcrb	Uqcrb	8.3e-05	145	177	0.527	0.579	0.0011	-0.0521	-0.28	DOWN
Srrt	Srrt	0.00012	76	92	0.314	0.389	0.0015	-0.0754	-0.28	DOWN
Uqcr10	Uqcr10	0.00015	190	230	0.623	0.65	0.0018	-0.0265	-0.28	DOWN
Esd	Esd	0.00031	97	118	0.398	0.472	0.0033	-0.0744	-0.28	DOWN
Pcbd2	Pcbd2	0.00033	40	49	0.174	0.237	0.0035	-0.063	-0.28	DOWN
Chchd1	Chchd1	0.00051	66	81	0.297	0.364	0.0052	-0.0666	-0.28	DOWN
Rap1b	Rap1b	0.00076	231	281	0.658	0.698	0.0073	-0.0398	-0.28	DOWN
Sf3b5	Sf3b5	0.0012	109	132	0.431	0.49	0.01	-0.0593	-0.28	DOWN
Eri1	Eri1	0.0014	45	55	0.212	0.273	0.012	-0.0607	-0.28	DOWN
Magoh	Magoh	0.0015	87	106	0.365	0.422	0.013	-0.057	-0.28	DOWN
Srsf9	Srsf9	0.0016	44	53	0.216	0.275	0.013	-0.0594	-0.28	DOWN
Nubp1	Nubp1	0.0024	50	60	0.238	0.297	0.019	-0.0589	-0.28	DOWN
Snx2	Snx2	0.0029	44	54	0.214	0.272	0.022	-0.0577	-0.28	DOWN
Nabp2	Nabp2	0.0061	31	38	0.164	0.21	0.04	-0.0462	-0.28	DOWN
Oaz1	Oaz1	3.3e-12	698	852	0.932	0.936	1.8e-10	-0.0044	-0.29	DOWN
Actb	Actb	1.2e-11	6959	8506	1	1	5.7e-10		-0.29	DOWN
Snrpg	Snrpg	4e-10	360	439	0.791	0.83	1.6e-08	-0.0393	-0.29	DOWN
Gnai2	Gnai2	9.1e-09	464	567	0.857	0.871	3e-07	-0.0137	-0.29	DOWN
Cyba	Cyba	3.4e-07	467	569	0.839	0.854	8.6e-06	-0.0149	-0.29	DOWN
Trac	Trac	7e-07	398	486	0.682	0.76	1.6e-05	-0.0779	-0.29	DOWN
Myl12a	Myl12a	2.4e-06	270	330	0.721	0.741	4.8e-05	-0.0205	-0.29	DOWN
Smdt1	Smdt1	2.8e-06	153	187	0.525	0.594	5.6e-05	-0.0693	-0.29	DOWN
Cdk2ap2	Cdk2ap2	1.4e-05	199	243	0.598	0.675	0.00023	-0.0767	-0.29	DOWN
Cct5	Cct5	1.5e-05	168	206	0.576	0.635	0.00026	-0.0588	-0.29	DOWN
Psmd3	Psmd3	9.5e-05	43	52	0.206	0.281	0.0012	-0.0746	-0.29	DOWN
Atp5g1	Atp5g1	0.0001	215	263	0.643	0.678	0.0013	-0.0349	-0.29	DOWN
Mrpl35	Mrpl35	0.00011	34	42	0.165	0.231	0.0013	-0.0662	-0.29	DOWN
Mbd2	Mbd2	0.00013	151	185	0.535	0.598	0.0016	-0.063	-0.29	DOWN
Smc3	Smc3	0.00015	105	128	0.387	0.46	0.0018	-0.0733	-0.29	DOWN
Ndufv2	Ndufv2	0.00018	82	100	0.352	0.427	0.0021	-0.0747	-0.29	DOWN
Mien1	Mien1	0.00034	87	107	0.359	0.436	0.0036	-0.0766	-0.29	DOWN
Dynlrb1	Dynlrb1	0.00042	100	122	0.399	0.468	0.0043	-0.0692	-0.29	DOWN
Mrps24	Mrps24	0.00047	105	128	0.437	0.499	0.0048	-0.0622	-0.29	DOWN
Anapc5	Anapc5	0.00053	101	123	0.391	0.455	0.0053	-0.0635	-0.29	DOWN
Vdac1	Vdac1	0.00056	55	68	0.25	0.316	0.0056	-0.0658	-0.29	DOWN
Acly	Acly	0.00057	46	57	0.204	0.271	0.0056	-0.0666	-0.29	DOWN
Snrpc	Snrpc	0.0011	81	99	0.355	0.415	0.0098	-0.0596	-0.29	DOWN
Azin1	Azin1	0.0012	43	52	0.199	0.261	0.01	-0.0616	-0.29	DOWN
Acp1	Acp1	0.0013	50	61	0.235	0.297	0.011	-0.0619	-0.29	DOWN
Gsk3a	Gsk3a	0.0015	44	54	0.214	0.274	0.013	-0.0598	-0.29	DOWN
Cycs	Cycs	0.002	122	148	0.452	0.495	0.016	-0.043	-0.29	DOWN
Etf1	Etf1	0.0023	57	70	0.272	0.329	0.018	-0.057	-0.29	DOWN
Ncaph2	Ncaph2	0.0028	41	50	0.204	0.255	0.021	-0.0514	-0.29	DOWN
Prpf31	Prpf31	0.0032	31	38	0.162	0.213	0.024	-0.0508	-0.29	DOWN
Ngly1	Ngly1	0.0032	37	45	0.177	0.225	0.024	-0.0479	-0.29	DOWN
Cdkn2aipnl	Cdkn2aipnl	0.0036	40	49	0.203	0.254	0.026	-0.0513	-0.29	DOWN
Prdx3	Prdx3	0.004	38	46	0.193	0.244	0.028	-0.0508	-0.29	DOWN
Ncbp2	Ncbp2	0.0049	34	41	0.168	0.215	0.033	-0.0469	-0.29	DOWN
Rcc2	Rcc2	0.0062	61	74	0.276	0.328	0.04	-0.0524	-0.29	DOWN
Ccl5	Ccl5	2.2e-17	6275	7705	0.862	0.61	2.7e-15	0.2519	-0.3	DOWN
Tma7	Tma7	1e-10	324	400	0.77	0.826	4.2e-09	-0.0555	-0.3	DOWN
Sh3bgrl3	Sh3bgrl3	1.8e-10	722	891	0.919	0.934	7.6e-09	-0.0148	-0.3	DOWN
Rbx1	Rbx1	1.1e-07	209	256	0.638	0.698	2.9e-06	-0.0604	-0.3	DOWN
Pomp	Pomp	3.4e-06	194	239	0.615	0.665	6.7e-05	-0.0497	-0.3	DOWN
Nono	Nono	6.2e-06	129	159	0.471	0.556	0.00011	-0.085	-0.3	DOWN
Cbx1	Cbx1	2.2e-05	97	119	0.373	0.452	0.00035	-0.0794	-0.3	DOWN
Psmc5	Psmc5	4.3e-05	68	84	0.305	0.391	0.00062	-0.086	-0.3	DOWN
Cbx3	Cbx3	4.8e-05	170	209	0.554	0.603	0.00068	-0.0493	-0.3	DOWN
Stat1	Stat1	0.00017	209	256	0.526	0.588	0.002	-0.062	-0.3	DOWN
Tbcb	Tbcb	0.00023	50	62	0.23	0.302	0.0026	-0.0722	-0.3	DOWN
Fkbp3	Fkbp3	0.00029	152	188	0.544	0.59	0.0032	-0.0456	-0.3	DOWN
Cox20	Cox20	0.00039	71	87	0.317	0.384	0.004	-0.0671	-0.3	DOWN
Ndufa5	Ndufa5	0.0004	81	100	0.358	0.426	0.0041	-0.0676	-0.3	DOWN
Psmc2	Psmc2	0.0004	58	72	0.278	0.347	0.0042	-0.0688	-0.3	DOWN
Sars	Sars	0.0005	114	141	0.436	0.509	0.0051	-0.0732	-0.3	DOWN
Vps36	Vps36	0.00063	66	81	0.28	0.35	0.0062	-0.0705	-0.3	DOWN
Parp1	Parp1	0.00071	47	58	0.219	0.282	0.0068	-0.0632	-0.3	DOWN
Ndufv1	Ndufv1	0.00091	49	61	0.229	0.291	0.0084	-0.0621	-0.3	DOWN
Snf8	Snf8	0.001	66	81	0.304	0.368	0.0091	-0.0638	-0.3	DOWN
Atxn10	Atxn10	0.0016	44	54	0.219	0.276	0.013	-0.0574	-0.3	DOWN
Cdc123	Cdc123	0.002	38	47	0.186	0.242	0.016	-0.0557	-0.3	DOWN
Ppp1r2	Ppp1r2	0.0021	31	39	0.158	0.208	0.017	-0.0501	-0.3	DOWN
Ptpn11	Ptpn11	0.0026	42	51	0.183	0.234	0.02	-0.0514	-0.3	DOWN
Tspo	Tspo	0.0057	254	312	0.707	0.707	0.038	-0.0003	-0.3	DOWN
Calm1	Calm1	2.3e-12	818	1011	0.945	0.948	1.3e-10	-0.003	-0.31	DOWN
Edf1	Edf1	4.7e-07	206	255	0.636	0.699	1.1e-05	-0.0629	-0.31	DOWN
Atp5g3	Atp5g3	1.5e-05	157	195	0.54	0.597	0.00026	-0.057	-0.31	DOWN
Derl1	Derl1	0.00019	48	60	0.229	0.3	0.0022	-0.0705	-0.31	DOWN
Mvb12a	Mvb12a	0.00054	46	57	0.212	0.275	0.0054	-0.0634	-0.31	DOWN
Ifi209	Ifi209	0.0006	116	144	0.408	0.469	0.0059	-0.0607	-0.31	DOWN
Sh3bgrl	Sh3bgrl	0.00077	44	55	0.192	0.252	0.0073	-0.0602	-0.31	DOWN
Cdk4	Cdk4	0.00092	76	94	0.341	0.4	0.0085	-0.0589	-0.31	DOWN
Cops4	Cops4	0.0014	37	46	0.179	0.235	0.012	-0.0559	-0.31	DOWN
Gspt1	Gspt1	0.0014	88	109	0.373	0.432	0.012	-0.0595	-0.31	DOWN
Rhof	Rhof	0.0015	49	60	0.226	0.285	0.013	-0.0588	-0.31	DOWN
Polr3c	Polr3c	0.0061	32	40	0.165	0.211	0.039	-0.0462	-0.31	DOWN
Smim7	Smim7	0.0072	31	38	0.164	0.21	0.045	-0.0457	-0.31	DOWN
Hnrnpf	Hnrnpf	1.1e-14	415	519	0.843	0.875	8e-13	-0.0319	-0.32	DOWN
Snrpe	Snrpe	2.8e-10	308	383	0.754	0.784	1.1e-08	-0.03	-0.32	DOWN
Ppp1ca	Ppp1ca	1.3e-08	340	423	0.793	0.823	4.2e-07	-0.0304	-0.32	DOWN
Clic1	Clic1	6.4e-07	429	535	0.844	0.853	1.5e-05	-0.0089	-0.32	DOWN
Hmg20b	Hmg20b	1.4e-05	34	43	0.148	0.222	0.00023	-0.0743	-0.32	DOWN
Mrps16	Mrps16	1.6e-05	119	149	0.451	0.533	0.00026	-0.0818	-0.32	DOWN
Pon2	Pon2	7.8e-05	36	45	0.159	0.226	0.001	-0.0675	-0.32	DOWN
Ppp1cc	Ppp1cc	8.4e-05	133	166	0.515	0.564	0.0011	-0.0488	-0.32	DOWN
Psmb5	Psmb5	8.5e-05	127	158	0.49	0.549	0.0011	-0.0591	-0.32	DOWN
Pin1	Pin1	0.00011	44	54	0.207	0.28	0.0014	-0.0726	-0.32	DOWN
Tmem126a	Tmem126a	0.00015	40	50	0.187	0.257	0.0018	-0.07	-0.32	DOWN
Tmem208	Tmem208	0.00017	56	70	0.254	0.327	0.002	-0.0734	-0.32	DOWN
Rangap1	Rangap1	0.00018	65	82	0.276	0.345	0.0021	-0.0687	-0.32	DOWN
Psmb2	Psmb2	0.00042	109	137	0.438	0.487	0.0043	-0.0486	-0.32	DOWN
Psmd1	Psmd1	0.00046	39	49	0.181	0.245	0.0047	-0.0639	-0.32	DOWN
Dda1	Dda1	0.00046	42	53	0.203	0.268	0.0047	-0.065	-0.32	DOWN
Faim	Faim	0.00056	33	41	0.154	0.211	0.0055	-0.0567	-0.32	DOWN
Eif2b2	Eif2b2	0.00064	27	34	0.146	0.202	0.0062	-0.0558	-0.32	DOWN
Derl2	Derl2	0.00066	38	47	0.178	0.241	0.0064	-0.0632	-0.32	DOWN
Bri3	Bri3	0.00077	51	64	0.231	0.296	0.0074	-0.0648	-0.32	DOWN
Exosc7	Exosc7	0.00089	44	55	0.221	0.282	0.0083	-0.0607	-0.32	DOWN
Med28	Med28	0.00095	67	84	0.313	0.376	0.0087	-0.0627	-0.32	DOWN
Htatsf1	Htatsf1	0.0012	36	45	0.17	0.226	0.01	-0.056	-0.32	DOWN
Pdcl3	Pdcl3	0.0014	34	42	0.179	0.235	0.012	-0.0564	-0.32	DOWN
Nudc	Nudc	0.0017	92	115	0.386	0.442	0.014	-0.0559	-0.32	DOWN
Rbbp4	Rbbp4	0.0019	106	131	0.427	0.473	0.015	-0.0465	-0.32	DOWN
Parl	Parl	0.0025	32	40	0.159	0.209	0.019	-0.0501	-0.32	DOWN
Rilpl2	Rilpl2	0.0038	43	54	0.19	0.237	0.027	-0.047	-0.32	DOWN
Slc25a5	Slc25a5	2e-09	313	393	0.759	0.78	7.1e-08	-0.0208	-0.33	DOWN
Calr	Calr	1e-06	267	335	0.651	0.698	2.3e-05	-0.0468	-0.33	DOWN
Cox5b	Cox5b	3e-06	288	363	0.74	0.75	6e-05	-0.0099	-0.33	DOWN
Psma4	Psma4	1.4e-05	125	157	0.479	0.545	0.00024	-0.0659	-0.33	DOWN
Hsp90b1	Hsp90b1	4.3e-05	219	275	0.605	0.644	0.00062	-0.0387	-0.33	DOWN
Erh	Erh	4.6e-05	56	70	0.243	0.323	0.00065	-0.0796	-0.33	DOWN
Eloc	Eloc	9.1e-05	85	107	0.357	0.429	0.0012	-0.0723	-0.33	DOWN
Eif2s1	Eif2s1	0.00018	74	93	0.337	0.405	0.0021	-0.0681	-0.33	DOWN
Szrd1	Szrd1	0.00026	36	45	0.171	0.236	0.0028	-0.0655	-0.33	DOWN
Eif4e	Eif4e	0.00032	43	53	0.212	0.277	0.0034	-0.0655	-0.33	DOWN
Prpf18	Prpf18	0.00062	34	43	0.161	0.219	0.0061	-0.0581	-0.33	DOWN
Hmgn5	Hmgn5	0.0007	38	47	0.161	0.217	0.0067	-0.0555	-0.33	DOWN
Polr2k	Polr2k	0.0016	60	75	0.282	0.341	0.013	-0.0585	-0.33	DOWN
Jtb	Jtb	0.0016	49	61	0.234	0.294	0.013	-0.0603	-0.33	DOWN
Pdlim2	Pdlim2	0.0023	44	56	0.223	0.278	0.018	-0.055	-0.33	DOWN
Cmtm7	Cmtm7	0.003	85	107	0.335	0.385	0.022	-0.0497	-0.33	DOWN
Nadk	Nadk	0.005	32	41	0.166	0.212	0.034	-0.0458	-0.33	DOWN
Cox7a2	Cox7a2	8.4e-08	228	289	0.678	0.706	2.3e-06	-0.0277	-0.34	DOWN
Ube2l3	Ube2l3	4.6e-06	122	155	0.471	0.548	8.8e-05	-0.0766	-0.34	DOWN
Prelid1	Prelid1	2.1e-05	137	173	0.51	0.566	0.00034	-0.0559	-0.34	DOWN
Psip1	Psip1	2.2e-05	107	135	0.391	0.467	0.00035	-0.0762	-0.34	DOWN
Anapc11	Anapc11	2.9e-05	63	80	0.269	0.352	0.00045	-0.0831	-0.34	DOWN
Nop58	Nop58	5.4e-05	113	144	0.394	0.47	0.00075	-0.0763	-0.34	DOWN
Nudt21	Nudt21	7.2e-05	78	99	0.348	0.42	0.00095	-0.0719	-0.34	DOWN
Polr2c	Polr2c	0.00028	46	59	0.227	0.296	0.003	-0.0694	-0.34	DOWN
Coro1b	Coro1b	0.00048	65	82	0.284	0.355	0.0049	-0.0712	-0.34	DOWN
Txndc17	Txndc17	0.00066	85	107	0.362	0.423	0.0064	-0.061	-0.34	DOWN
Ppp1r35	Ppp1r35	0.0015	32	40	0.165	0.22	0.013	-0.0547	-0.34	DOWN
M6pr	M6pr	0.0023	67	85	0.304	0.355	0.018	-0.0512	-0.34	DOWN
Ndufa4	Ndufa4	4.2e-11	317	403	0.771	0.793	1.9e-09	-0.022	-0.35	DOWN
Srsf3	Srsf3	3.3e-08	266	337	0.719	0.733	9.9e-07	-0.0141	-0.35	DOWN
Ndufb9	Ndufb9	3.7e-07	148	189	0.52	0.6	9.3e-06	-0.0796	-0.35	DOWN
Srsf2	Srsf2	7.8e-07	167	214	0.546	0.6	1.8e-05	-0.0541	-0.35	DOWN
Ndufa11	Ndufa11	2e-06	109	139	0.434	0.509	4.2e-05	-0.0747	-0.35	DOWN
Tomm22	Tomm22	2.4e-06	118	150	0.459	0.548	4.9e-05	-0.0886	-0.35	DOWN
Sugt1	Sugt1	5.2e-06	102	130	0.398	0.488	9.8e-05	-0.0902	-0.35	DOWN
Rdx	Rdx	6.1e-06	110	140	0.415	0.498	0.00011	-0.0832	-0.35	DOWN
Atox1	Atox1	6.7e-06	123	156	0.459	0.542	0.00012	-0.0833	-0.35	DOWN
Ndufb8	Ndufb8	7.6e-06	107	136	0.421	0.498	0.00014	-0.0772	-0.35	DOWN
Dctn3	Dctn3	1.4e-05	78	100	0.338	0.423	0.00024	-0.085	-0.35	DOWN
Dnajb11	Dnajb11	3e-05	55	70	0.254	0.334	0.00046	-0.0802	-0.35	DOWN
Actn4	Actn4	4.9e-05	72	92	0.315	0.395	0.00069	-0.0796	-0.35	DOWN
Senp1	Senp1	0.00017	33	43	0.164	0.229	0.002	-0.0646	-0.35	DOWN
Arpc1a	Arpc1a	0.00017	35	45	0.167	0.233	0.002	-0.0663	-0.35	DOWN
Ddost	Ddost	0.00019	59	75	0.283	0.351	0.0022	-0.068	-0.35	DOWN
Bbip1	Bbip1	0.00021	40	51	0.186	0.253	0.0024	-0.0668	-0.35	DOWN
Psmd2	Psmd2	0.00071	71	90	0.313	0.376	0.0068	-0.0627	-0.35	DOWN
Phb	Phb	0.001	37	47	0.166	0.222	0.0095	-0.0563	-0.35	DOWN
Vmp1	Vmp1	0.0019	59	75	0.263	0.321	0.015	-0.0581	-0.35	DOWN
Hdgfl2	Hdgfl2	0.0051	31	39	0.156	0.204	0.034	-0.0479	-0.35	DOWN
Atp5j2	Atp5j2	1.6e-12	318	409	0.778	0.813	9.2e-11	-0.0349	-0.36	DOWN
Ube2n	Ube2n	4.3e-07	64	83	0.28	0.375	1e-05	-0.0947	-0.36	DOWN
Taldo1	Taldo1	4.7e-07	153	196	0.543	0.626	1.1e-05	-0.0834	-0.36	DOWN
Ywhae	Ywhae	8.3e-07	156	201	0.525	0.597	1.9e-05	-0.0725	-0.36	DOWN
Ostc	Ostc	2.1e-06	84	108	0.364	0.452	4.4e-05	-0.0884	-0.36	DOWN
Supt16	Supt16	2.2e-06	97	124	0.376	0.463	4.5e-05	-0.0875	-0.36	DOWN
Tkt	Tkt	5.4e-06	115	149	0.44	0.508	0.0001	-0.0676	-0.36	DOWN
Sec11c	Sec11c	9.7e-06	128	164	0.482	0.533	0.00017	-0.0508	-0.36	DOWN
Uba2	Uba2	1.2e-05	48	62	0.221	0.304	0.0002	-0.0833	-0.36	DOWN
Pnp	Pnp	1.5e-05	37	47	0.164	0.242	0.00025	-0.0782	-0.36	DOWN
Mbd3	Mbd3	2.6e-05	64	82	0.274	0.359	0.00039	-0.0854	-0.36	DOWN
Cenpx	Cenpx	3e-05	74	95	0.32	0.393	0.00045	-0.0731	-0.36	DOWN
Ube2m	Ube2m	3.4e-05	76	98	0.323	0.403	0.00051	-0.08	-0.36	DOWN
U2af1	U2af1	4.5e-05	86	111	0.367	0.441	0.00064	-0.0739	-0.36	DOWN
Mtch2	Mtch2	5e-05	47	60	0.216	0.295	0.0007	-0.0793	-0.36	DOWN
Rbbp7	Rbbp7	6.4e-05	84	108	0.347	0.413	0.00087	-0.066	-0.36	DOWN
Cdc34	Cdc34	6.5e-05	41	53	0.202	0.274	0.00088	-0.0718	-0.36	DOWN
Mrpl14	Mrpl14	9.2e-05	43	56	0.201	0.273	0.0012	-0.0717	-0.36	DOWN
Mettl9	Mettl9	0.00017	30	38	0.142	0.202	0.002	-0.0603	-0.36	DOWN
Snrpb2	Snrpb2	0.00021	71	91	0.312	0.386	0.0024	-0.0737	-0.36	DOWN
Polr2h	Polr2h	0.00047	32	41	0.166	0.223	0.0048	-0.0573	-0.36	DOWN
Yipf4	Yipf4	0.00057	36	46	0.182	0.243	0.0057	-0.0608	-0.36	DOWN
Lyar	Lyar	0.00066	49	63	0.221	0.28	0.0064	-0.0591	-0.36	DOWN
Rbm3	Rbm3	5.4e-12	404	520	0.814	0.829	2.8e-10	-0.0152	-0.37	DOWN
Psme2	Psme2	5.6e-10	270	348	0.704	0.759	2.1e-08	-0.0553	-0.37	DOWN
Cox5a	Cox5a	2.7e-09	230	297	0.67	0.716	9.3e-08	-0.0462	-0.37	DOWN
Mdh2	Mdh2	6e-09	139	181	0.5	0.597	2e-07	-0.097	-0.37	DOWN
Ldha	Ldha	9.5e-08	248	321	0.656	0.702	2.6e-06	-0.0455	-0.37	DOWN
Bcl11b	Bcl11b	3.6e-07	228	294	0.595	0.669	9.1e-06	-0.0739	-0.37	DOWN
Ndufs6	Ndufs6	2.3e-06	109	141	0.434	0.507	4.6e-05	-0.0731	-0.37	DOWN
Psma1	Psma1	3.7e-06	93	120	0.387	0.47	7.2e-05	-0.0828	-0.37	DOWN
Banf1	Banf1	1.1e-05	107	138	0.424	0.491	0.00019	-0.0673	-0.37	DOWN
Med8	Med8	7.6e-05	40	52	0.193	0.265	0.001	-0.0724	-0.37	DOWN
Drg1	Drg1	9.1e-05	36	47	0.183	0.253	0.0012	-0.0698	-0.37	DOWN
Dpy30	Dpy30	0.00013	42	54	0.203	0.271	0.0016	-0.0682	-0.37	DOWN
Ndufb6	Ndufb6	0.00017	64	83	0.3	0.371	0.002	-0.071	-0.37	DOWN
Spcs3	Spcs3	0.00031	33	43	0.162	0.222	0.0033	-0.0603	-0.37	DOWN
Gps1	Gps1	0.0012	30	39	0.158	0.211	0.011	-0.0532	-0.37	DOWN
Elob	Elob	7.6e-12	284	371	0.735	0.783	3.8e-10	-0.048	-0.38	DOWN
Lsm4	Lsm4	1.5e-09	161	210	0.553	0.63	5.4e-08	-0.0771	-0.38	DOWN
Ndufb7	Ndufb7	7.3e-07	174	226	0.592	0.634	1.7e-05	-0.0417	-0.38	DOWN
Psmb7	Psmb7	2.8e-06	62	80	0.27	0.36	5.7e-05	-0.0905	-0.38	DOWN
Hspa14	Hspa14	6.8e-06	43	55	0.199	0.281	0.00012	-0.0821	-0.38	DOWN
Ssna1	Ssna1	1.9e-05	51	66	0.232	0.311	0.0003	-0.0786	-0.38	DOWN
Syngr2	Syngr2	4.3e-05	34	44	0.163	0.234	0.00062	-0.0714	-0.38	DOWN
Mrpl13	Mrpl13	7.2e-05	42	55	0.205	0.277	0.00096	-0.0725	-0.38	DOWN
Dtymk	Dtymk	8.2e-05	40	52	0.184	0.25	0.0011	-0.0661	-0.38	DOWN
Cyc1	Cyc1	9.8e-05	67	88	0.314	0.387	0.0012	-0.0733	-0.38	DOWN
Pcnt	Pcnt	0.00022	52	67	0.228	0.296	0.0025	-0.0678	-0.38	DOWN
Myo1g	Myo1g	0.00023	82	107	0.339	0.403	0.0027	-0.0635	-0.38	DOWN
Cd6	Cd6	0.00033	67	87	0.275	0.338	0.0035	-0.0629	-0.38	DOWN
Usp14	Usp14	0.00065	33	43	0.165	0.221	0.0063	-0.0562	-0.38	DOWN
Atp5f1	Atp5f1	2e-11	222	291	0.663	0.724	9.2e-10	-0.0606	-0.39	DOWN
Actg1	Actg1	6.1e-08	1605	2097	0.984	0.973	1.7e-06	0.0113	-0.39	DOWN
Spcs1	Spcs1	8.3e-07	84	111	0.356	0.455	1.9e-05	-0.0991	-0.39	DOWN
Bag1	Bag1	1.8e-06	103	135	0.412	0.501	3.8e-05	-0.0888	-0.39	DOWN
Ndufs8	Ndufs8	4.5e-06	64	84	0.283	0.369	8.5e-05	-0.0864	-0.39	DOWN
Psmd13	Psmd13	1.2e-05	69	91	0.315	0.398	0.00021	-0.0833	-0.39	DOWN
Maz	Maz	5.7e-05	73	95	0.316	0.391	0.00079	-0.0755	-0.39	DOWN
Sf3b4	Sf3b4	0.00011	35	46	0.184	0.252	0.0014	-0.0677	-0.39	DOWN
Kdelr2	Kdelr2	0.00029	28	36	0.143	0.202	0.0032	-0.0593	-0.39	DOWN
Tap1	Tap1	9.3e-08	136	180	0.467	0.561	2.6e-06	-0.0937	-0.4	DOWN
Atp1a1	Atp1a1	3.3e-07	103	135	0.4	0.5	8.3e-06	-0.0997	-0.4	DOWN
Hsp90aa1	Hsp90aa1	3.8e-07	297	391	0.719	0.732	9.4e-06	-0.013	-0.4	DOWN
Fkbp1a	Fkbp1a	4.8e-07	106	140	0.419	0.506	1.1e-05	-0.087	-0.4	DOWN
Rnaseh2c	Rnaseh2c	1.1e-06	95	126	0.386	0.479	2.4e-05	-0.0932	-0.4	DOWN
Rwdd1	Rwdd1	2.1e-06	92	122	0.386	0.471	4.4e-05	-0.0848	-0.4	DOWN
Vdac3	Vdac3	2.2e-06	64	84	0.283	0.375	4.5e-05	-0.0917	-0.4	DOWN
1810037I17Rik	1810037I17Rik	4e-06	119	158	0.458	0.522	7.7e-05	-0.0638	-0.4	DOWN
Pdap1	Pdap1	7.4e-06	115	151	0.429	0.496	0.00013	-0.0671	-0.4	DOWN
Rtn3	Rtn3	7.5e-06	64	85	0.294	0.378	0.00013	-0.0843	-0.4	DOWN
Ubl4a	Ubl4a	2e-05	40	52	0.186	0.264	0.00032	-0.0783	-0.4	DOWN
Lsm12	Lsm12	2.3e-05	70	92	0.306	0.39	0.00036	-0.0839	-0.4	DOWN
Ssr2	Ssr2	0.00022	62	82	0.296	0.359	0.0025	-0.0634	-0.4	DOWN
Pgk1	Pgk1	0.00024	100	132	0.398	0.453	0.0027	-0.0555	-0.4	DOWN
Tox	Tox	0.0041	60	80	0.227	0.275	0.029	-0.0484	-0.4	DOWN
Tagln2	Tagln2	2.7e-09	282	376	0.686	0.743	9.3e-08	-0.0565	-0.41	DOWN
Ssbp3	Ssbp3	1.6e-06	48	64	0.189	0.276	3.4e-05	-0.0869	-0.41	DOWN
Mrpl20	Mrpl20	2.4e-06	69	91	0.317	0.403	4.9e-05	-0.0855	-0.41	DOWN
Ap2s1	Ap2s1	3e-06	90	119	0.38	0.458	5.9e-05	-0.0777	-0.41	DOWN
Rnpep	Rnpep	7.3e-06	29	39	0.131	0.205	0.00013	-0.0745	-0.41	DOWN
Snrnp40	Snrnp40	9.4e-06	45	60	0.218	0.302	0.00016	-0.0842	-0.41	DOWN
Grpel1	Grpel1	1.7e-05	55	73	0.255	0.341	0.00028	-0.086	-0.41	DOWN
Ndufc2	Ndufc2	1.9e-05	87	116	0.388	0.459	0.00031	-0.0707	-0.41	DOWN
Ccdc82	Ccdc82	2e-05	46	61	0.203	0.28	0.00031	-0.0766	-0.41	DOWN
Timm8b	Timm8b	2e-05	42	56	0.188	0.263	0.00032	-0.0753	-0.41	DOWN
Fam96a	Fam96a	3.2e-05	58	77	0.269	0.346	0.00048	-0.0773	-0.41	DOWN
Ptpa	Ptpa	3.3e-05	41	55	0.195	0.268	0.00049	-0.073	-0.41	DOWN
Ube2a	Ube2a	5e-05	40	53	0.196	0.271	0.00069	-0.0746	-0.41	DOWN
Magt1	Magt1	0.00066	46	61	0.225	0.284	0.0064	-0.0593	-0.41	DOWN
Polr2j	Polr2j	8.1e-08	78	104	0.343	0.45	2.3e-06	-0.1073	-0.42	DOWN
Sh3bp1	Sh3bp1	1.3e-05	46	62	0.208	0.286	0.00023	-0.0779	-0.42	DOWN
Stip1	Stip1	3e-05	58	77	0.261	0.339	0.00045	-0.0779	-0.42	DOWN
Gadd45gip1	Gadd45gip1	3.6e-05	70	93	0.307	0.393	0.00053	-0.0861	-0.42	DOWN
Gars	Gars	3.7e-05	47	62	0.221	0.296	0.00054	-0.0748	-0.42	DOWN
Rbmxl1	Rbmxl1	6.7e-05	40	54	0.196	0.27	0.00091	-0.0736	-0.42	DOWN
Immp1l	Immp1l	7e-05	32	43	0.162	0.23	0.00093	-0.0676	-0.42	DOWN
Pkp3	Pkp3	0.00024	49	66	0.198	0.26	0.0027	-0.0621	-0.42	DOWN
Cd5	Cd5	0.0014	84	113	0.332	0.383	0.012	-0.0511	-0.42	DOWN
Arl6ip1	Arl6ip1	0.0033	257	344	0.696	0.698	0.024	-0.0024	-0.42	DOWN
2310001H17Rik	2310001H17Rik	0.0034	33	44	0.156	0.202	0.025	-0.0458	-0.42	DOWN
Sdhb	Sdhb	6.9e-07	91	123	0.382	0.469	1.6e-05	-0.0867	-0.43	DOWN
Mrpl40	Mrpl40	5.3e-06	35	47	0.163	0.241	9.9e-05	-0.0777	-0.43	DOWN
Tmem14c	Tmem14c	5.3e-06	105	142	0.42	0.497	9.9e-05	-0.0766	-0.43	DOWN
Lsm8	Lsm8	6.5e-06	51	69	0.233	0.317	0.00012	-0.0839	-0.43	DOWN
Slirp	Slirp	9.1e-06	33	44	0.165	0.243	0.00016	-0.0783	-0.43	DOWN
Nans	Nans	1.7e-05	46	62	0.225	0.304	0.00027	-0.0793	-0.43	DOWN
Ap3s1	Ap3s1	3e-05	34	46	0.16	0.231	0.00045	-0.0707	-0.43	DOWN
1110008P14Rik	1110008P14Rik	4e-05	42	56	0.184	0.256	0.00058	-0.0719	-0.43	DOWN
Nudt5	Nudt5	0.00014	33	45	0.167	0.231	0.0017	-0.0642	-0.43	DOWN
Cpsf2	Cpsf2	0.00021	38	51	0.186	0.251	0.0024	-0.0652	-0.43	DOWN
Snrpa	Snrpa	0.00021	38	51	0.198	0.263	0.0024	-0.0653	-0.43	DOWN
Hmgb1	Hmgb1	1.5e-09	478	649	0.855	0.864	5.5e-08	-0.0089	-0.44	DOWN
Cox17	Cox17	5.4e-08	132	179	0.482	0.571	1.6e-06	-0.0887	-0.44	DOWN
Reep5	Reep5	1.2e-07	123	167	0.421	0.511	3.2e-06	-0.0898	-0.44	DOWN
Lsm6	Lsm6	1.6e-07	84	113	0.358	0.448	4.3e-06	-0.0897	-0.44	DOWN
Manf	Manf	4.4e-07	80	108	0.33	0.428	1.1e-05	-0.0983	-0.44	DOWN
Ntan1	Ntan1	6.1e-07	45	62	0.2	0.294	1.4e-05	-0.0937	-0.44	DOWN
Snrpa1	Snrpa1	2.3e-06	52	71	0.24	0.329	4.7e-05	-0.0895	-0.44	DOWN
Lsm5	Lsm5	6.2e-06	84	114	0.364	0.441	0.00011	-0.0774	-0.44	DOWN
Atg3	Atg3	0.00013	44	59	0.223	0.293	0.0016	-0.0697	-0.44	DOWN
Atp5j	Atp5j	4.9e-14	239	326	0.673	0.733	3.4e-12	-0.0595	-0.45	DOWN
Akt1	Akt1	7e-07	43	59	0.201	0.293	1.6e-05	-0.0922	-0.45	DOWN
Cd48	Cd48	8e-07	186	254	0.565	0.616	1.8e-05	-0.0514	-0.45	DOWN
Hprt	Hprt	8.7e-07	68	92	0.302	0.389	2e-05	-0.0869	-0.45	DOWN
Timm17a	Timm17a	2e-06	42	57	0.197	0.285	4.1e-05	-0.0883	-0.45	DOWN
Rpa1	Rpa1	3e-06	43	59	0.207	0.291	5.9e-05	-0.0836	-0.45	DOWN
Rfc2	Rfc2	6.8e-06	44	60	0.199	0.276	0.00012	-0.0774	-0.45	DOWN
Pbdc1	Pbdc1	2.5e-05	41	56	0.207	0.28	0.00038	-0.0731	-0.45	DOWN
Vamp8	Vamp8	4.2e-05	94	128	0.381	0.454	0.00061	-0.073	-0.45	DOWN
Ndfip1	Ndfip1	0.00017	36	49	0.176	0.24	0.002	-0.0636	-0.45	DOWN
Tpi1	Tpi1	0.00041	44	61	0.212	0.27	0.0042	-0.0581	-0.45	DOWN
Ybx1	Ybx1	2.8e-14	416	572	0.841	0.864	2e-12	-0.0229	-0.46	DOWN
Abracl	Abracl	2.4e-12	236	324	0.663	0.735	1.3e-10	-0.0722	-0.46	DOWN
Ssrp1	Ssrp1	1.4e-07	102	140	0.394	0.484	3.7e-06	-0.09	-0.46	DOWN
Hnrnpab	Hnrnpab	7.3e-07	163	225	0.542	0.59	1.7e-05	-0.0476	-0.46	DOWN
2010111I01Rik	2010111I01Rik	1.2e-06	35	48	0.149	0.229	2.7e-05	-0.0796	-0.46	DOWN
Mrps36	Mrps36	1.5e-06	57	78	0.268	0.358	3.3e-05	-0.0899	-0.46	DOWN
Phf5a	Phf5a	1.6e-06	68	93	0.308	0.396	3.4e-05	-0.0882	-0.46	DOWN
Suz12	Suz12	2.4e-06	66	91	0.283	0.372	4.9e-05	-0.0885	-0.46	DOWN
Ehmt2	Ehmt2	6.1e-06	34	46	0.155	0.231	0.00011	-0.0762	-0.46	DOWN
S100a13	S100a13	1.7e-05	160	221	0.554	0.602	0.00028	-0.0477	-0.46	DOWN
Etfa	Etfa	3.7e-05	35	48	0.18	0.251	0.00054	-0.0707	-0.46	DOWN
Sympk	Sympk	0.00042	27	37	0.147	0.204	0.0043	-0.0569	-0.46	DOWN
Prdx2	Prdx2	0.0019	126	173	0.458	0.498	0.016	-0.0396	-0.46	DOWN
Fkbp5	Fkbp5	1.1e-07	31	43	0.125	0.209	3.1e-06	-0.0836	-0.47	DOWN
Bcl7c	Bcl7c	1.3e-06	36	50	0.164	0.248	2.9e-05	-0.084	-0.47	DOWN
Txnl4a	Txnl4a	4.6e-05	34	47	0.174	0.245	0.00066	-0.0709	-0.47	DOWN
Sssca1	Sssca1	4.8e-05	30	41	0.151	0.218	0.00068	-0.0671	-0.47	DOWN
Dynll2	Dynll2	0.00014	32	44	0.162	0.223	0.0017	-0.0608	-0.47	DOWN
Npc2	Npc2	1.3e-13	236	329	0.63	0.747	8e-12	-0.1172	-0.48	DOWN
Rps27l	Rps27l	2.1e-08	113	157	0.439	0.516	6.3e-07	-0.077	-0.48	DOWN
Sar1b	Sar1b	2e-06	35	49	0.172	0.252	4.2e-05	-0.0802	-0.48	DOWN
Med21	Med21	2.7e-06	37	51	0.186	0.267	5.4e-05	-0.0809	-0.48	DOWN
Hif1a	Hif1a	2.1e-05	53	74	0.228	0.3	0.00034	-0.0715	-0.48	DOWN
Igtp	Igtp	0.00013	49	68	0.201	0.264	0.0015	-0.0633	-0.48	DOWN
Hint1	Hint1	1e-14	286	400	0.744	0.774	7.7e-13	-0.0295	-0.49	DOWN
Srsf7	Srsf7	1.3e-08	89	125	0.359	0.458	4e-07	-0.0992	-0.49	DOWN
Etfb	Etfb	4.1e-07	59	83	0.269	0.36	1e-05	-0.0915	-0.49	DOWN
Nasp	Nasp	5.5e-07	65	91	0.266	0.355	1.3e-05	-0.0887	-0.49	DOWN
Ctsb	Ctsb	8.2e-06	73	102	0.297	0.381	0.00015	-0.084	-0.49	DOWN
P4hb	P4hb	9.9e-06	47	66	0.229	0.308	0.00017	-0.0795	-0.49	DOWN
Taf12	Taf12	2.4e-05	34	48	0.173	0.246	0.00038	-0.0729	-0.49	DOWN
Itgb7	Itgb7	8.1e-12	175	248	0.534	0.631	4e-10	-0.0971	-0.5	DOWN
Eif1ax	Eif1ax	1.6e-07	63	89	0.278	0.376	4.3e-06	-0.0977	-0.5	DOWN
Map4k1	Map4k1	8.7e-06	30	42	0.147	0.219	0.00015	-0.0721	-0.5	DOWN
Nudcd2	Nudcd2	6.5e-05	28	40	0.144	0.206	0.00088	-0.062	-0.5	DOWN
Prdx1	Prdx1	6e-13	207	294	0.623	0.681	3.6e-11	-0.058	-0.51	DOWN
Lsp1	Lsp1	5.2e-10	373	530	0.789	0.815	2e-08	-0.026	-0.51	DOWN
Fundc2	Fundc2	1.1e-08	69	98	0.303	0.405	3.5e-07	-0.1021	-0.51	DOWN
Mrps18c	Mrps18c	1.8e-07	46	65	0.215	0.314	4.6e-06	-0.0992	-0.51	DOWN
Ncapd3	Ncapd3	4.2e-07	36	52	0.16	0.246	1e-05	-0.0865	-0.51	DOWN
Hras	Hras	6e-07	34	49	0.159	0.245	1.4e-05	-0.0859	-0.51	DOWN
Crip1	Crip1	1.7e-05	896	1277	0.925	0.9	0.00028	0.0248	-0.51	DOWN
Id2	Id2	1.2e-07	208	298	0.404	0.49	3.3e-06	-0.0863	-0.52	DOWN
Rpn2	Rpn2	4e-07	67	96	0.311	0.399	9.9e-06	-0.0878	-0.52	DOWN
Ech1	Ech1	2.8e-06	53	76	0.247	0.334	5.5e-05	-0.0867	-0.52	DOWN
Ebp	Ebp	8.7e-08	47	67	0.224	0.321	2.4e-06	-0.0965	-0.53	DOWN
Cd2bp2	Cd2bp2	1.8e-07	36	53	0.174	0.263	4.7e-06	-0.0893	-0.53	DOWN
Tuba1a	Tuba1a	1.6e-06	55	79	0.242	0.325	3.4e-05	-0.0833	-0.53	DOWN
Rad21	Rad21	8.1e-06	74	107	0.31	0.381	0.00014	-0.071	-0.53	DOWN
Fmr1	Fmr1	1.5e-05	38	54	0.178	0.25	0.00025	-0.0721	-0.53	DOWN
Atad2	Atad2	1.8e-05	66	95	0.272	0.344	0.0003	-0.0717	-0.53	DOWN
Psmb9	Psmb9	9.8e-13	160	233	0.545	0.631	5.8e-11	-0.0861	-0.54	DOWN
Nfyb	Nfyb	2.2e-08	43	62	0.188	0.289	6.7e-07	-0.101	-0.54	DOWN
Spn	Spn	1.3e-10	158	233	0.509	0.605	5.6e-09	-0.0964	-0.56	DOWN
Ppa1	Ppa1	4e-07	34	50	0.164	0.25	9.8e-06	-0.0861	-0.56	DOWN
Tank	Tank	5.2e-06	29	43	0.143	0.216	9.8e-05	-0.073	-0.56	DOWN
Ybx3	Ybx3	9.3e-05	66	98	0.292	0.351	0.0012	-0.059	-0.56	DOWN
Gapdh	Gapdh	1e-14	578	861	0.887	0.878	7.7e-13	0.0089	-0.57	DOWN
Pkm	Pkm	3e-13	171	254	0.559	0.642	1.9e-11	-0.0831	-0.57	DOWN
Nap1l1	Nap1l1	1.2e-11	151	225	0.518	0.59	5.8e-10	-0.0716	-0.57	DOWN
Gm8369	Gm8369	3.2e-10	107	159	0.346	0.456	1.3e-08	-0.1096	-0.57	DOWN
Anxa5	Anxa5	1.5e-06	37	54	0.17	0.251	3.3e-05	-0.0812	-0.57	DOWN
Hist1h1c	Hist1h1c	2.9e-06	63	93	0.236	0.321	5.7e-05	-0.0851	-0.57	DOWN
Il6ra	Il6ra	0.00057	34	51	0.156	0.208	0.0056	-0.0521	-0.57	DOWN
Ywhah	Ywhah	4.2e-10	100	149	0.403	0.494	1.6e-08	-0.091	-0.58	DOWN
Ptma	Ptma	1.1e-12	1198	1799	0.974	0.959	6.3e-11	0.015	-0.59	DOWN
Ranbp1	Ranbp1	8.4e-10	117	176	0.427	0.514	3.1e-08	-0.0869	-0.59	DOWN
Commd1	Commd1	4.9e-08	31	47	0.156	0.248	1.4e-06	-0.092	-0.59	DOWN
Cd226	Cd226	2.3e-05	56	85	0.238	0.307	0.00036	-0.0689	-0.59	DOWN
Aplp2	Aplp2	3.3e-05	33	50	0.149	0.214	0.00049	-0.0654	-0.59	DOWN
Snrpd1	Snrpd1	5.9e-10	88	134	0.365	0.462	2.2e-08	-0.0969	-0.6	DOWN
Dpysl2	Dpysl2	2.4e-07	30	46	0.143	0.227	6e-06	-0.084	-0.6	DOWN
Pgp	Pgp	3.9e-06	29	45	0.152	0.228	7.6e-05	-0.0761	-0.6	DOWN
Cbx5	Cbx5	1.3e-08	43	66	0.188	0.286	4.1e-07	-0.0979	-0.61	DOWN
Kcnn4	Kcnn4	1.9e-08	65	100	0.274	0.377	5.8e-07	-0.1028	-0.61	DOWN
Slbp	Slbp	5.7e-08	77	118	0.31	0.397	1.6e-06	-0.0867	-0.61	DOWN
H2afz	H2afz	0.0059	554	844	0.875	0.83	0.038	0.0453	-0.61	DOWN
Hdgf	Hdgf	5.4e-10	96	148	0.391	0.486	2.1e-08	-0.0951	-0.62	DOWN
Dnajc9	Dnajc9	1.9e-09	82	125	0.333	0.44	6.6e-08	-0.1074	-0.62	DOWN
Topbp1	Topbp1	1.3e-09	37	56	0.174	0.279	4.8e-08	-0.105	-0.63	DOWN
Ddx39	Ddx39	2.6e-09	53	83	0.247	0.351	8.9e-08	-0.104	-0.63	DOWN
Mtch1	Mtch1	3.8e-08	43	67	0.207	0.304	1.1e-06	-0.0973	-0.63	DOWN
Rpa3	Rpa3	3.1e-07	23	36	0.121	0.201	7.7e-06	-0.0797	-0.63	DOWN
Emp3	Emp3	5.7e-20	296	462	0.681	0.771	1e-17	-0.0904	-0.64	DOWN
Calm3	Calm3	2.8e-09	101	157	0.401	0.483	9.5e-08	-0.0824	-0.64	DOWN
Acsl5	Acsl5	7.3e-07	36	57	0.189	0.273	1.7e-05	-0.0843	-0.64	DOWN
Mrpl18	Mrpl18	2.3e-11	76	120	0.345	0.453	1e-09	-0.1085	-0.65	DOWN
Lsm3	Lsm3	2.8e-09	48	75	0.234	0.335	9.5e-08	-0.1013	-0.65	DOWN
S100a11	S100a11	3e-08	214	335	0.624	0.648	9.2e-07	-0.0244	-0.65	DOWN
Phf11b	Phf11b	2.3e-06	46	72	0.206	0.285	4.7e-05	-0.0793	-0.65	DOWN
Bak1	Bak1	2.7e-06	28	44	0.145	0.22	5.4e-05	-0.0747	-0.65	DOWN
Racgap1	Racgap1	3.4e-06	58	91	0.252	0.329	6.7e-05	-0.0775	-0.65	DOWN
Anp32e	Anp32e	1.5e-09	84	133	0.34	0.433	5.5e-08	-0.093	-0.66	DOWN
Phgdh	Phgdh	1.5e-07	55	86	0.249	0.338	3.8e-06	-0.0889	-0.66	DOWN
Pou2f2	Pou2f2	5e-07	65	104	0.216	0.302	1.2e-05	-0.0862	-0.66	DOWN
Selenoh	Selenoh	5.6e-07	86	135	0.37	0.44	1.3e-05	-0.0698	-0.66	DOWN
Nucks1	Nucks1	3.5e-12	138	218	0.488	0.574	1.9e-10	-0.0864	-0.67	DOWN
Usp1	Usp1	5.5e-09	42	67	0.192	0.291	1.8e-07	-0.0991	-0.67	DOWN
Car2	Car2	4.2e-08	62	98	0.132	0.217	1.2e-06	-0.085	-0.67	DOWN
Anp32b	Anp32b	3.4e-20	250	401	0.678	0.74	6.4e-18	-0.0619	-0.68	DOWN
Exosc8	Exosc8	8.8e-11	51	82	0.246	0.36	3.8e-09	-0.1145	-0.68	DOWN
Lat	Lat	3.7e-25	200	324	0.565	0.706	1.3e-22	-0.1413	-0.69	DOWN
Hpf1	Hpf1	1.1e-08	46	74	0.228	0.322	3.5e-07	-0.0936	-0.69	DOWN
Mcm4	Mcm4	3.3e-08	33	54	0.157	0.246	9.9e-07	-0.0889	-0.7	DOWN
Ran	Ran	1.4e-14	240	391	0.694	0.717	9.8e-13	-0.0228	-0.71	DOWN
H2afv	H2afv	2.8e-08	142	233	0.502	0.564	8.5e-07	-0.0624	-0.72	DOWN
Cisd1	Cisd1	3.4e-08	25	42	0.13	0.216	1e-06	-0.086	-0.74	DOWN
Dbf4	Dbf4	2.7e-08	28	46	0.126	0.21	8.2e-07	-0.0842	-0.75	DOWN
Gm12840	Gm12840	2e-06	57	96	0.15	0.222	4.2e-05	-0.0723	-0.76	DOWN
Tubb5	Tubb5	1.3e-20	346	590	0.744	0.807	2.7e-18	-0.0631	-0.77	DOWN
Rpa2	Rpa2	3.2e-12	35	59	0.152	0.269	1.7e-10	-0.1165	-0.77	DOWN
Ube2s	Ube2s	2e-05	120	204	0.439	0.494	0.00031	-0.055	-0.77	DOWN
Prf1	Prf1	0.00025	53	89	0.229	0.28	0.0028	-0.0506	-0.77	DOWN
Txn1	Txn1	2.4e-17	177	305	0.567	0.643	2.8e-15	-0.0762	-0.78	DOWN
Dbi	Dbi	2.4e-14	90	156	0.359	0.481	1.7e-12	-0.1218	-0.79	DOWN
Atpif1	Atpif1	1.1e-13	82	143	0.321	0.453	7.1e-12	-0.1325	-0.79	DOWN
Odc1	Odc1	7.3e-07	37	64	0.172	0.251	1.7e-05	-0.0792	-0.79	DOWN
Vim	Vim	2.6e-10	281	489	0.594	0.652	1.1e-08	-0.0576	-0.8	DOWN
Hjurp	Hjurp	8.2e-09	38	67	0.179	0.272	2.7e-07	-0.0932	-0.83	DOWN
Batf	Batf	3.6e-06	29	52	0.144	0.214	7e-05	-0.0704	-0.83	DOWN
Dek	Dek	4.6e-17	154	276	0.524	0.615	5.1e-15	-0.0908	-0.84	DOWN
S100a10	S100a10	1.6e-15	533	955	0.861	0.864	1.3e-13	-0.0034	-0.84	DOWN
Tmpo	Tmpo	7.7e-10	75	134	0.326	0.413	2.9e-08	-0.0865	-0.84	DOWN
Siva1	Siva1	1.9e-08	26	47	0.136	0.223	5.9e-07	-0.0873	-0.84	DOWN
Dnmt1	Dnmt1	2.4e-12	58	105	0.258	0.372	1.3e-10	-0.1135	-0.85	DOWN
Hat1	Hat1	4.3e-10	24	43	0.121	0.218	1.7e-08	-0.0971	-0.85	DOWN
Atxn1	Atxn1	2.9e-06	40	73	0.186	0.257	5.8e-05	-0.0715	-0.86	DOWN
Pycard	Pycard	5.1e-19	165	301	0.521	0.638	8.2e-17	-0.1175	-0.87	DOWN
Alyref	Alyref	1.8e-11	43	79	0.232	0.337	8.4e-10	-0.1054	-0.87	DOWN
Fkbp2	Fkbp2	2.8e-12	28	52	0.137	0.25	1.5e-10	-0.1131	-0.88	DOWN
Cdc25b	Cdc25b	3.1e-08	30	54	0.128	0.212	9.4e-07	-0.0838	-0.88	DOWN
Cd8a	Cd8a	8.6e-26	191	356	0.441	0.601	3.7e-23	-0.1602	-0.89	DOWN
Lsm2	Lsm2	4.7e-13	34	64	0.179	0.304	2.9e-11	-0.1247	-0.89	DOWN
Nsd2	Nsd2	4.5e-10	32	59	0.138	0.234	1.8e-08	-0.0964	-0.89	DOWN
Csrp1	Csrp1	3.7e-14	21	41	0.1	0.217	2.6e-12	-0.1165	-0.95	DOWN
Cxcr6	Cxcr6	1.4e-07	37	73	0.145	0.223	3.6e-06	-0.0778	-0.97	DOWN
Cd8b1	Cd8b1	4.2e-40	431	858	0.457	0.669	1.2e-36	-0.2119	-0.99	DOWN
Tubb4b	Tubb4b	1.9e-06	94	186	0.355	0.419	4.1e-05	-0.0643	-0.99	DOWN
Inpp4b	Inpp4b	7.8e-15	54	109	0.221	0.355	5.9e-13	-0.1337	-1	DOWN
Ckap5	Ckap5	4.1e-13	27	55	0.121	0.236	2.5e-11	-0.1149	-1.03	DOWN
Dctpp1	Dctpp1	5e-13	25	51	0.127	0.239	3.1e-11	-0.1116	-1.03	DOWN
Pcna	Pcna	2.6e-11	41	84	0.201	0.305	1.2e-09	-0.1043	-1.03	DOWN
Dapl1	Dapl1	2.1e-09	110	226	0.17	0.262	7.4e-08	-0.0917	-1.04	DOWN
Ppil1	Ppil1	1e-13	17	36	0.092	0.2	6.8e-12	-0.1082	-1.1	DOWN
Tuba1c	Tuba1c	3.5e-09	31	66	0.145	0.234	1.2e-07	-0.0894	-1.1	DOWN
Bcl2a1b	Bcl2a1b	5.8e-15	30	66	0.117	0.238	4.6e-13	-0.121	-1.13	DOWN
Ifi27l2a	Ifi27l2a	3.1e-22	384	852	0.529	0.671	7.7e-20	-0.1415	-1.15	DOWN
Ptms	Ptms	8.1e-19	37	81	0.117	0.26	1.3e-16	-0.1426	-1.15	DOWN
Hist1h1e	Hist1h1e	1.1e-08	61	135	0.223	0.313	3.6e-07	-0.0897	-1.15	DOWN
Hist1h4d	Hist1h4d	1.7e-06	30	66	0.133	0.203	3.7e-05	-0.0698	-1.15	DOWN
Mcm6	Mcm6	3.8e-16	40	93	0.188	0.318	3.7e-14	-0.1299	-1.21	DOWN
S100a6	S100a6	0.00068	369	875	0.491	0.48	0.0065	0.0112	-1.24	DOWN
Mcm7	Mcm7	6.8e-16	34	82	0.164	0.29	6.2e-14	-0.1261	-1.25	DOWN
Cmc2	Cmc2	6.3e-15	17	43	0.09	0.204	4.9e-13	-0.1139	-1.29	DOWN
Mcm2	Mcm2	1.6e-15	19	48	0.104	0.222	1.3e-13	-0.1183	-1.3	DOWN
Ly6a	Ly6a	7e-23	71	175	0.146	0.311	2e-20	-0.1651	-1.31	DOWN
Hmgn2	Hmgn2	4.1e-18	44	113	0.197	0.336	5.6e-16	-0.1393	-1.35	DOWN
Tuba1b	Tuba1b	2.4e-17	120	316	0.403	0.517	2.8e-15	-0.1136	-1.39	DOWN
Dut	Dut	1.7e-20	47	123	0.202	0.351	3.3e-18	-0.149	-1.4	DOWN
Lgals1	Lgals1	5.8e-16	394	1039	0.625	0.673	5.4e-14	-0.0481	-1.4	DOWN
Mcm3	Mcm3	9e-18	29	82	0.136	0.266	1.1e-15	-0.1304	-1.51	DOWN
H2afx	H2afx	1.1e-09	35	101	0.173	0.266	4e-08	-0.0929	-1.55	DOWN
Smc2	Smc2	2e-19	30	92	0.134	0.273	3.3e-17	-0.1387	-1.63	DOWN
Ezh2	Ezh2	6.4e-27	23	78	0.1	0.269	3.1e-24	-0.1685	-1.73	DOWN
Cenpa	Cenpa	7e-14	32	105	0.128	0.239	4.7e-12	-0.1106	-1.73	DOWN
Cks2	Cks2	1.2e-15	20	70	0.099	0.212	1e-13	-0.1133	-1.8	DOWN
Rrm1	Rrm1	3.5e-20	15	51	0.084	0.215	6.5e-18	-0.1309	-1.82	DOWN
Hmgb2	Hmgb2	1.4e-18	262	931	0.646	0.682	2.1e-16	-0.0361	-1.83	DOWN
Mcm5	Mcm5	8.1e-26	14	59	0.071	0.222	3.6e-23	-0.1513	-2.05	DOWN
Lmnb1	Lmnb1	1.4e-24	21	89	0.105	0.259	4.9e-22	-0.1535	-2.1	DOWN
Lig1	Lig1	1.5e-21	14	61	0.074	0.207	3.5e-19	-0.1325	-2.14	DOWN
S100a4	S100a4	3.5e-32	64	511	0.138	0.323	3e-29	-0.1852	-3	DOWN
Mki67	Mki67	4.3e-34	25	232	0.067	0.246	5.8e-31	-0.1789	-3.2	DOWN
Stmn1	Stmn1	1.2e-33	26	257	0.105	0.286	1.2e-30	-0.1809	-3.29	DOWN
Top2a	Top2a	7.6e-34	11	191	0.056	0.228	8.6e-31	-0.1715	-4.07	DOWN

## Sheet: Cluster 3
	gene_name	pval	exp_case	exp_control	pct_case	pct_control	adjust_pval	pct_diff	rawLog2FoldChange	direction
Ptma	Ptma	4.1e-143	3839	1818.1	1	0.959	6e-139	0.04099	1.08	UP
Stmn1	Stmn1	7.8e-129	954	278	0.8	0.286	5.8e-125	0.51649	1.78	UP
Ran	Ran	9.8e-110	839	388.8	0.97	0.714	4.8e-106	0.25761	1.11	UP
Tuba1b	Tuba1b	2.2e-106	897	329.5	0.91	0.51	8e-103	0.39767	1.44	UP
Pclaf	Pclaf	3.7e-104	403	111.9	0.62	0.174	1.1e-100	0.44333	1.85	UP
Lmnb1	Lmnb1	7.4e-96	276	92.5	0.72	0.274	1.8e-92	0.44565	1.58	UP
Anp32b	Anp32b	1e-94	796	406.9	0.98	0.741	2.1e-91	0.23604	0.97	UP
Mki67	Mki67	2.8e-89	795	242	0.66	0.251	5.1e-86	0.41409	1.71	UP
Birc5	Birc5	7.5e-89	326	88.4	0.55	0.16	1.2e-85	0.39224	1.88	UP
Top2a	Top2a	8.6e-88	674	203.3	0.66	0.245	1.3e-84	0.41359	1.73	UP
Ppia	Ppia	1.4e-87	3123	2070.7	1	0.992	1.8e-84	0.00841	0.59	UP
Dut	Dut	3.8e-87	338	124.6	0.77	0.356	4.7e-84	0.41782	1.44	UP
Cks1b	Cks1b	1.4e-86	207	61.6	0.6	0.199	1.5e-83	0.40424	1.75	UP
Mcm5	Mcm5	1.9e-84	171	57.1	0.64	0.222	2e-81	0.41369	1.58	UP
Malat1	Malat1	4.8e-83	13008	25555.9	1	0.999	4.7e-80	-0.00183	-0.97	DOWN
Gapdh	Gapdh	6.4e-80	1554	845.7	0.98	0.877	5.9e-77	0.10714	0.88	UP
H2afz	H2afz	4e-79	1863	840.8	0.97	0.827	3.4e-76	0.13979	1.15	UP
Hmgb2	Hmgb2	9.1e-79	2608	926.1	0.88	0.688	7.5e-76	0.19271	1.49	UP
Cdca8	Cdca8	3.1e-78	194	56.7	0.52	0.157	2.4e-75	0.36518	1.77	UP
Smc2	Smc2	4.6e-77	266	100.1	0.7	0.288	3.4e-74	0.40935	1.41	UP
Spc24	Spc24	5.5e-77	134	39.1	0.5	0.142	3.8e-74	0.35596	1.78	UP
Hmgn2	Hmgn2	2.6e-76	302	118.6	0.75	0.354	1.7e-73	0.39546	1.35	UP
Lig1	Lig1	6.7e-76	189	64.9	0.6	0.21	4.3e-73	0.38601	1.54	UP
Ranbp1	Ranbp1	2.6e-75	367	170.9	0.87	0.502	1.6e-72	0.37154	1.1	UP
Mcm3	Mcm3	2.7e-75	222	81.9	0.66	0.27	1.6e-72	0.39465	1.44	UP
Rrm2	Rrm2	7.8e-75	184	52	0.49	0.143	4.4e-72	0.34628	1.82	UP
Rrm1	Rrm1	3.1e-74	149	49.6	0.58	0.208	1.7e-71	0.37608	1.58	UP
Ybx1	Ybx1	1.2e-73	997	569	0.98	0.855	6.1e-71	0.12724	0.81	UP
Gmnn	Gmnn	3e-73	132	44.1	0.55	0.183	1.5e-70	0.37056	1.58	UP
Hmgb1	Hmgb1	1e-71	1211	666.4	0.99	0.871	5.1e-69	0.11776	0.86	UP
Tyms	Tyms	2.8e-71	140	44.7	0.52	0.167	1.3e-68	0.3552	1.64	UP
Mcm7	Mcm7	1.8e-70	210	81.5	0.66	0.281	8.5e-68	0.38414	1.37	UP
Rps27	Rps27	3.1e-70	4189	6865.3	1	0.999	1.4e-67	-0.00091	-0.71	DOWN
Ube2s	Ube2s	4e-70	511	204.7	0.84	0.49	1.7e-67	0.35001	1.32	UP
Ccna2	Ccna2	2.1e-69	139	39.7	0.44	0.12	8.7e-67	0.32048	1.81	UP
Snrpd1	Snrpd1	5.3e-69	278	133.5	0.84	0.458	2.1e-66	0.38547	1.06	UP
Tpx2	Tpx2	1e-68	148	41.3	0.45	0.132	4.1e-66	0.32225	1.84	UP
Ccnb2	Ccnb2	1.2e-68	178	52.6	0.46	0.136	4.8e-66	0.32721	1.76	UP
Dek	Dek	3.2e-68	556	275	0.9	0.61	1.2e-65	0.28828	1.02	UP
Cenpe	Cenpe	8.1e-68	165	49	0.46	0.138	3e-65	0.32511	1.75	UP
Asf1b	Asf1b	8.4e-68	104	29.9	0.47	0.14	3e-65	0.32588	1.79	UP
Uhrf1	Uhrf1	1.1e-67	99	29.2	0.47	0.143	3.9e-65	0.32848	1.76	UP
Hist1h1b	Hist1h1b	7.5e-67	551	155.2	0.46	0.142	2.6e-64	0.3209	1.83	UP
Tmpo	Tmpo	1.8e-66	315	139	0.8	0.428	5.9e-64	0.36885	1.18	UP
Clspn	Clspn	3.2e-66	108	33.6	0.47	0.141	1.1e-63	0.32483	1.69	UP
Nucks1	Nucks1	4e-66	434	213.3	0.89	0.56	1.3e-63	0.33048	1.03	UP
Cdca3	Cdca3	8.1e-66	131	35.3	0.44	0.128	2.5e-63	0.31063	1.89	UP
Cdk1	Cdk1	1.2e-64	135	39.8	0.44	0.13	3.7e-62	0.31193	1.77	UP
Hells	Hells	1.4e-64	119	41.1	0.52	0.179	4.3e-62	0.34167	1.53	UP
Ezh2	Ezh2	2.3e-64	194	80.8	0.65	0.275	6.6e-62	0.37697	1.26	UP
Tipin	Tipin	9.4e-64	109	40	0.54	0.19	2.7e-61	0.34646	1.45	UP
Hist1h2ap	Hist1h2ap	9.7e-64	864	228.4	0.48	0.164	2.7e-61	0.31806	1.92	UP
Anp32e	Anp32e	1.5e-63	287	135.3	0.8	0.431	4.3e-61	0.3691	1.09	UP
Cit	Cit	2.6e-63	96	30.6	0.45	0.134	7.1e-61	0.31492	1.64	UP
Txn1	Txn1	3.6e-63	550	300.1	0.92	0.636	9.5e-61	0.28215	0.87	UP
Cks2	Cks2	5.8e-63	207	71.5	0.56	0.217	1.5e-60	0.34465	1.53	UP
Ube2c	Ube2c	2.1e-62	332	100.1	0.48	0.165	5.2e-60	0.31845	1.73	UP
Hsp90aa1	Hsp90aa1	2.1e-62	738	398	0.96	0.732	5.2e-60	0.23059	0.89	UP
Tubb5	Tubb5	2.3e-61	1211	606.7	0.96	0.803	5.6e-59	0.15533	1	UP
Fau	Fau	4.8e-60	4171	5422.8	1	1	1.2e-57		-0.38	DOWN
Tubb4b	Tubb4b	6.9e-60	497	193.5	0.75	0.418	1.7e-57	0.33188	1.36	UP
Kif15	Kif15	1.1e-59	95	29.1	0.41	0.119	2.5e-57	0.29223	1.71	UP
Tacc3	Tacc3	1.6e-59	95	29.2	0.42	0.127	3.6e-57	0.29494	1.71	UP
Cenpf	Cenpf	2.7e-59	263	76.2	0.41	0.123	6.2e-57	0.28999	1.79	UP
Tk1	Tk1	3.8e-59	78	23.2	0.41	0.122	8.5e-57	0.29195	1.74	UP
Kif11	Kif11	5.4e-59	112	32.6	0.4	0.116	1.2e-56	0.28583	1.77	UP
Mcm6	Mcm6	5.4e-59	220	92.5	0.67	0.314	1.2e-56	0.35626	1.25	UP
Nusap1	Nusap1	1.7e-58	171	49.3	0.4	0.119	3.8e-56	0.28503	1.79	UP
Prim1	Prim1	1e-57	85	29.6	0.46	0.153	2.2e-55	0.30843	1.52	UP
Knl1	Knl1	1e-57	113	34.2	0.41	0.125	2.2e-55	0.28841	1.72	UP
Hnrnpab	Hnrnpab	1.4e-57	428	234.3	0.91	0.606	2.9e-55	0.29915	0.87	UP
Pcna	Pcna	1.8e-57	199	84.5	0.66	0.307	3.8e-55	0.34871	1.24	UP
Lockd	Lockd	2e-57	136	48.2	0.49	0.175	4e-55	0.3171	1.5	UP
Dctpp1	Dctpp1	2.8e-57	121	50.8	0.58	0.232	5.6e-55	0.35047	1.25	UP
Ncapd2	Ncapd2	3.5e-57	92	32.2	0.47	0.158	6.8e-55	0.31089	1.52	UP
Rfc4	Rfc4	6.5e-57	78	25.8	0.45	0.149	1.3e-54	0.30112	1.59	UP
Spc25	Spc25	6.6e-56	71	20.6	0.37	0.104	1.3e-53	0.26862	1.78	UP
Prc1	Prc1	7e-56	160	48.9	0.42	0.135	1.3e-53	0.28653	1.71	UP
Hmmr	Hmmr	1.2e-55	119	32.5	0.36	0.1	2.3e-53	0.26366	1.87	UP
Ncapg2	Ncapg2	3e-55	72	21.4	0.39	0.112	5.5e-53	0.27316	1.74	UP
Hint1	Hint1	3.2e-55	661	398.5	0.95	0.775	5.8e-53	0.17939	0.73	UP
Rad51	Rad51	5.4e-55	61	17.6	0.37	0.102	9.7e-53	0.26352	1.79	UP
Hist1h2ae	Hist1h2ae	7.8e-55	423	125.4	0.44	0.156	1.4e-52	0.28762	1.75	UP
Fkbp2	Fkbp2	1.2e-54	119	51.4	0.6	0.25	2e-52	0.34843	1.21	UP
Lsm2	Lsm2	1.5e-54	129	61.1	0.65	0.287	2.7e-52	0.36632	1.08	UP
H2afx	H2afx	9.8e-54	303	106.1	0.59	0.267	1.7e-51	0.32246	1.52	UP
Hdgf	Hdgf	1.1e-53	280	146.3	0.82	0.477	1.8e-51	0.34353	0.94	UP
Cenpw	Cenpw	2.8e-53	81	29.7	0.45	0.157	4.7e-51	0.29664	1.44	UP
Mad2l1	Mad2l1	6.2e-53	65	20.6	0.39	0.119	1e-50	0.27064	1.65	UP
Ddx39	Ddx39	1.3e-52	167	80.1	0.69	0.342	2.1e-50	0.34908	1.06	UP
Eif5a	Eif5a	1.9e-52	788	442.6	0.96	0.763	3e-50	0.19383	0.83	UP
Srsf2	Srsf2	2.5e-52	370	211	0.9	0.593	4e-50	0.31032	0.81	UP
Mcm2	Mcm2	6e-52	106	41.5	0.52	0.207	9.6e-50	0.31291	1.35	UP
Fen1	Fen1	6.3e-52	79	29.9	0.47	0.172	9.8e-50	0.30155	1.39	UP
Btg1	Btg1	1.5e-51	485	995.5	0.87	0.91	2.3e-49	-0.04199	-1.04	DOWN
Nap1l1	Nap1l1	1.6e-51	402	227.4	0.88	0.591	2.4e-49	0.28849	0.82	UP
Alyref	Alyref	1.7e-51	166	80.7	0.69	0.345	2.6e-49	0.34449	1.04	UP
Srsf3	Srsf3	5.6e-51	551	332	0.93	0.724	8.4e-49	0.20538	0.73	UP
Dtl	Dtl	9.6e-51	73	22.3	0.37	0.111	1.4e-48	0.25838	1.72	UP
Dbi	Dbi	1.1e-50	311	161	0.8	0.485	1.7e-48	0.31785	0.95	UP
Rbm3	Rbm3	2.2e-50	775	503.5	0.97	0.811	3.2e-48	0.15464	0.62	UP
Prdx1	Prdx1	2.7e-50	484	289.6	0.91	0.67	3.9e-48	0.2408	0.74	UP
Ldha	Ldha	3.3e-50	551	318.2	0.92	0.697	4.6e-48	0.22498	0.79	UP
Oaz1	Oaz1	3.3e-50	1210	851.9	1	0.936	4.6e-48	0.05927	0.51	UP
Selenoh	Selenoh	4.2e-50	274	133.7	0.77	0.446	5.9e-48	0.31933	1.03	UP
Kif22	Kif22	5.8e-50	73	21.4	0.36	0.105	8e-48	0.25082	1.78	UP
Cox5a	Cox5a	6.2e-50	469	289.9	0.95	0.701	8.5e-48	0.24433	0.69	UP
Nasp	Nasp	8.3e-50	187	96.3	0.72	0.363	1.1e-47	0.35487	0.96	UP
Diaph3	Diaph3	1.3e-49	70	23.2	0.37	0.113	1.7e-47	0.2568	1.59	UP
Atp5b	Atp5b	2.4e-49	656	431.5	0.97	0.806	3.3e-47	0.1599	0.6	UP
Incenp	Incenp	2.6e-49	123	45.7	0.46	0.177	3.4e-47	0.28818	1.43	UP
Slc25a5	Slc25a5	2.6e-49	614	388.8	0.96	0.766	3.4e-47	0.19264	0.66	UP
Ncapg	Ncapg	2.8e-49	64	19.2	0.35	0.102	3.6e-47	0.24717	1.74	UP
Cdca7	Cdca7	2.9e-49	65	22.4	0.39	0.122	3.7e-47	0.26317	1.54	UP
Fignl1	Fignl1	3.1e-49	45	12.5	0.32	0.087	4e-47	0.2356	1.83	UP
Fbxo5	Fbxo5	5.4e-49	99	33.9	0.41	0.138	6.8e-47	0.26808	1.54	UP
Cenpm	Cenpm	6.2e-49	48	13.9	0.33	0.092	7.7e-47	0.23898	1.79	UP
Rps21	Rps21	6.5e-49	3802	5407.4	1	0.999	8.1e-47	0.00105	-0.51	DOWN
Cdc20	Cdc20	1e-48	120	35.9	0.38	0.123	1.3e-46	0.25637	1.74	UP
Banf1	Banf1	1.1e-48	249	141	0.83	0.501	1.3e-46	0.33178	0.82	UP
Slbp	Slbp	1.1e-48	241	121.5	0.74	0.407	1.4e-46	0.33716	0.99	UP
Rps24	Rps24	2e-48	6545	8998	1	1	2.4e-46		-0.46	DOWN
Rpl18a	Rpl18a	3e-48	3831	5131.1	1	0.999	3.6e-46	0.00053	-0.42	DOWN
Aurkb	Aurkb	3.6e-48	60	16.9	0.33	0.092	4.2e-46	0.23557	1.84	UP
Chaf1a	Chaf1a	3.6e-48	55	17.9	0.35	0.105	4.2e-46	0.24742	1.63	UP
Kif23	Kif23	1.1e-47	102	35.4	0.42	0.147	1.3e-45	0.27013	1.53	UP
Ccnb1	Ccnb1	2.5e-47	83	24.5	0.33	0.091	2.8e-45	0.23427	1.76	UP
Mcm4	Mcm4	4.2e-47	115	51.1	0.54	0.229	4.8e-45	0.31098	1.17	UP
Rfc3	Rfc3	4.8e-47	76	26.9	0.4	0.139	5.5e-45	0.26362	1.5	UP
Atp5j	Atp5j	5.9e-47	493	317.2	0.95	0.739	6.7e-45	0.21081	0.64	UP
Hist1h3c	Hist1h3c	1.4e-46	212	64	0.33	0.095	1.6e-44	0.23294	1.73	UP
Pkm	Pkm	4.3e-46	424	251.3	0.9	0.63	4.8e-44	0.26687	0.76	UP
Rps27l	Rps27l	4.8e-46	271	151.5	0.82	0.505	5.3e-44	0.31371	0.84	UP
Nsd2	Nsd2	5.2e-46	145	66.6	0.57	0.258	5.7e-44	0.31177	1.12	UP
Siva1	Siva1	5.6e-46	108	47.7	0.52	0.221	6.1e-44	0.30304	1.18	UP
Cenpa	Cenpa	9.4e-46	283	100.8	0.51	0.232	1e-43	0.27905	1.49	UP
Cbx5	Cbx5	1.5e-45	143	68.5	0.62	0.298	1.6e-43	0.31879	1.07	UP
Aspm	Aspm	2.2e-45	81	24.8	0.32	0.09	2.3e-43	0.22669	1.7	UP
Tcf19	Tcf19	3.4e-45	68	21.1	0.35	0.11	3.6e-43	0.23929	1.69	UP
Pmf1	Pmf1	4.8e-45	84	36.5	0.48	0.193	5.1e-43	0.29151	1.21	UP
Hist1h2bj	Hist1h2bj	5.2e-45	72	21.1	0.31	0.086	5.5e-43	0.22173	1.78	UP
Ccdc34	Ccdc34	5.5e-45	87	36.2	0.46	0.178	5.6e-43	0.28138	1.27	UP
Dnmt1	Dnmt1	7e-45	216	110.2	0.7	0.382	7.2e-43	0.32013	0.97	UP
Hirip3	Hirip3	8.4e-45	71	27.8	0.43	0.16	8.6e-43	0.27047	1.36	UP
Kif4	Kif4	9.4e-45	64	18.7	0.3	0.082	9.6e-43	0.2173	1.77	UP
Srsf7	Srsf7	1e-44	210	118.8	0.8	0.456	1e-42	0.341	0.82	UP
Sgo1	Sgo1	2.4e-44	52	14.5	0.3	0.081	2.4e-42	0.21495	1.84	UP
Knstrn	Knstrn	2.8e-44	74	25	0.36	0.117	2.8e-42	0.24253	1.57	UP
Rpl37a	Rpl37a	4e-44	4153	5581.4	1	0.999	4e-42	0.00053	-0.43	DOWN
Tpi1	Tpi1	4.7e-44	130	58.3	0.57	0.265	4.6e-42	0.30441	1.15	UP
Bub1b	Bub1b	4.7e-44	61	19	0.33	0.098	4.6e-42	0.22744	1.68	UP
Ckap2l	Ckap2l	5.3e-44	53	14.5	0.29	0.08	5.1e-42	0.21313	1.87	UP
Esco2	Esco2	7.1e-44	69	20	0.3	0.084	6.8e-42	0.21664	1.79	UP
Hist1h2ab	Hist1h2ab	9.2e-44	96	27.8	0.29	0.081	8.8e-42	0.21351	1.79	UP
Rad51ap1	Rad51ap1	9.5e-44	49	14.7	0.31	0.088	9e-42	0.21963	1.73	UP
Rps14	Rps14	1e-43	3801	4950.3	1	1	9.7e-42		-0.38	DOWN
Ncaph	Ncaph	1.2e-43	48	14.2	0.3	0.085	1.1e-41	0.21612	1.77	UP
Plk1	Plk1	1.2e-43	60	16.9	0.3	0.083	1.2e-41	0.2139	1.83	UP
Lsm6	Lsm6	1.6e-43	197	111	0.77	0.44	1.4e-41	0.33283	0.82	UP
Snrpe	Snrpe	1.9e-43	574	384.9	0.95	0.787	1.7e-41	0.16534	0.58	UP
Fabp5	Fabp5	1.9e-43	72	25.2	0.37	0.122	1.8e-41	0.24355	1.52	UP
Tpt1	Tpt1	2.7e-43	6566	8319.1	1	1	2.5e-41		-0.34	DOWN
Rpl17	Rpl17	3.3e-43	3611	4754.6	1	1	2.9e-41		-0.4	DOWN
Dlgap5	Dlgap5	3.3e-43	69	25.7	0.37	0.124	3e-41	0.24433	1.43	UP
Ndc80	Ndc80	4.3e-43	63	18.9	0.32	0.097	3.8e-41	0.22509	1.73	UP
Rfc5	Rfc5	4.9e-43	64	26.9	0.42	0.157	4.3e-41	0.26643	1.26	UP
Cdkn3	Cdkn3	6.4e-43	65	19.1	0.3	0.088	5.6e-41	0.21584	1.76	UP
Ndufa4	Ndufa4	8.8e-43	594	396	0.96	0.793	7.7e-41	0.16623	0.59	UP
Cycs	Cycs	9.5e-43	260	150.8	0.82	0.508	8.3e-41	0.31252	0.79	UP
Hmgb3	Hmgb3	2.6e-42	60	22.3	0.37	0.123	2.2e-40	0.24198	1.42	UP
Calm3	Calm3	2.8e-42	280	154.6	0.78	0.484	2.4e-40	0.29967	0.86	UP
Atad5	Atad5	4.1e-42	52	19.3	0.35	0.116	3.5e-40	0.23782	1.44	UP
Dhfr	Dhfr	7.7e-42	59	20.3	0.35	0.114	6.5e-40	0.23273	1.53	UP
Rpl30	Rpl30	8.2e-42	3166	4168.1	1	1	6.9e-40		-0.4	DOWN
Ckap2	Ckap2	1.3e-41	58	17.8	0.31	0.09	1.1e-39	0.21465	1.71	UP
Nuf2	Nuf2	1.4e-41	46	13.4	0.29	0.081	1.2e-39	0.20684	1.8	UP
Hnrnpa3	Hnrnpa3	2.2e-41	674	444.7	0.96	0.805	1.9e-39	0.15323	0.6	UP
Atpif1	Atpif1	2.4e-41	266	144.9	0.77	0.453	2e-39	0.31969	0.88	UP
Cmc2	Cmc2	2.6e-41	91	40.1	0.47	0.195	2.2e-39	0.27934	1.18	UP
Ssrp1	Ssrp1	2.9e-41	237	138.7	0.8	0.484	2.4e-39	0.31315	0.77	UP
Tfdp1	Tfdp1	3.8e-41	68	28.3	0.43	0.167	3.1e-39	0.26167	1.27	UP
Rnaseh2b	Rnaseh2b	3.9e-41	80	37.4	0.49	0.205	3.1e-39	0.28427	1.09	UP
Pfn1	Pfn1	3.9e-41	2202	1584.5	1	0.971	3.2e-39	0.02602	0.47	UP
Sgo2a	Sgo2a	4.1e-41	52	14.6	0.27	0.075	3.3e-39	0.2002	1.84	UP
Tuba1c	Tuba1c	4.4e-41	164	66.5	0.52	0.239	3.5e-39	0.27941	1.3	UP
Rbbp7	Rbbp7	4.5e-41	205	115.4	0.76	0.437	3.5e-39	0.32395	0.83	UP
Cenpk	Cenpk	5.4e-41	44	14.4	0.32	0.1	4.3e-39	0.21958	1.59	UP
Kif20b	Kif20b	5.7e-41	84	32.5	0.39	0.145	4.5e-39	0.2483	1.37	UP
Hat1	Hat1	7.9e-41	89	41.3	0.5	0.211	6.1e-39	0.28516	1.11	UP
Cdc45	Cdc45	1.4e-40	38	12	0.29	0.086	1.1e-38	0.20787	1.67	UP
Pola1	Pola1	2.1e-40	63	24.5	0.38	0.135	1.6e-38	0.24102	1.37	UP
Mis18bp1	Mis18bp1	3.4e-40	61	18.7	0.28	0.081	2.6e-38	0.20344	1.7	UP
Hist1h1d	Hist1h1d	3.7e-40	127	47.2	0.39	0.148	2.8e-38	0.24371	1.42	UP
Ppil1	Ppil1	4.9e-40	77	35.9	0.48	0.201	3.7e-38	0.27696	1.11	UP
Shcbp1	Shcbp1	7.6e-40	45	12.6	0.27	0.075	5.7e-38	0.19588	1.84	UP
Usp1	Usp1	7.6e-40	137	73.8	0.63	0.313	5.7e-38	0.31611	0.89	UP
Orc6	Orc6	9e-40	71	29.7	0.42	0.168	6.7e-38	0.25683	1.25	UP
Nme1	Nme1	2.5e-39	412	244.6	0.86	0.612	1.9e-37	0.24824	0.75	UP
Set	Set	2.9e-39	686	435.5	0.95	0.792	2.2e-37	0.15721	0.66	UP
Mxd3	Mxd3	6.4e-39	56	15.6	0.26	0.073	4.7e-37	0.19171	1.83	UP
Cenph	Cenph	9.3e-39	39	12.1	0.28	0.085	6.8e-37	0.20029	1.7	UP
Eif4a1	Eif4a1	1.1e-38	570	365.9	0.94	0.763	7.7e-37	0.178	0.64	UP
Nudc	Nudc	1.2e-38	196	112.7	0.76	0.442	8.8e-37	0.32013	0.8	UP
Sumo2	Sumo2	1.3e-38	535	356.2	0.94	0.749	9.2e-37	0.18591	0.59	UP
Cdca5	Cdca5	1.3e-38	35	9	0.25	0.068	9.4e-37	0.18545	1.96	UP
Nrm	Nrm	1.6e-38	69	30.6	0.42	0.168	1.1e-36	0.25539	1.17	UP
Gins2	Gins2	3.5e-38	38	12.3	0.29	0.088	2.5e-36	0.20289	1.62	UP
Phgdh	Phgdh	4.7e-38	165	89.1	0.66	0.357	3.3e-36	0.30507	0.89	UP
Psat1	Psat1	4.7e-38	56	24.3	0.4	0.152	3.3e-36	0.24761	1.2	UP
Cox5b	Cox5b	6e-38	561	369	0.93	0.767	4.2e-36	0.15797	0.6	UP
Cep55	Cep55	8.3e-38	40	11.4	0.25	0.068	5.8e-36	0.18401	1.82	UP
Erh	Erh	9e-38	124	67.6	0.61	0.304	6.3e-36	0.31066	0.87	UP
Ppa1	Ppa1	1.4e-37	96	45.8	0.5	0.225	9.3e-36	0.27581	1.07	UP
Cdk2ap1	Cdk2ap1	2.4e-37	103	55.6	0.58	0.278	1.7e-35	0.29756	0.89	UP
Neil3	Neil3	3.1e-37	42	12.3	0.26	0.075	2.1e-35	0.18816	1.78	UP
Ywhah	Ywhah	3.1e-37	257	156	0.82	0.513	2.1e-35	0.30583	0.72	UP
Odc1	Odc1	3.2e-37	136	64.8	0.54	0.254	2.2e-35	0.28236	1.07	UP
Prdx4	Prdx4	3.6e-37	44	15.4	0.29	0.091	2.4e-35	0.20209	1.52	UP
Mpp6	Mpp6	4e-37	73	32.6	0.43	0.18	2.7e-35	0.25429	1.16	UP
Anapc15	Anapc15	5.6e-37	64	30.1	0.43	0.175	3.7e-35	0.25523	1.08	UP
E2f2	E2f2	6.8e-37	75	32.9	0.4	0.156	4.5e-35	0.24249	1.19	UP
Csrp1	Csrp1	1.3e-36	80	42	0.49	0.213	8.9e-35	0.27442	0.93	UP
Kif20a	Kif20a	1.4e-36	41	11.5	0.25	0.068	9.1e-35	0.18061	1.84	UP
Cd8b1	Cd8b1	1.6e-36	402	860.4	0.43	0.663	1e-34	-0.2353	-1.1	DOWN
Hnrnpd	Hnrnpd	1.8e-36	332	209.6	0.88	0.611	1.1e-34	0.2714	0.67	UP
Actg1	Actg1	1.9e-36	3036	2086.5	0.99	0.97	1.3e-34	0.017	0.54	UP
Hsp90ab1	Hsp90ab1	2.3e-36	2311	1556.1	0.99	0.977	1.5e-34	0.0154	0.57	UP
Rangap1	Rangap1	2.9e-36	149	81.9	0.65	0.343	1.9e-34	0.30434	0.86	UP
Exosc8	Exosc8	2.9e-36	141	81.5	0.67	0.351	1.9e-34	0.31804	0.79	UP
Hsp90b1	Hsp90b1	3.1e-36	476	285.1	0.88	0.645	2e-34	0.2396	0.74	UP
Atp5g3	Atp5g3	3.2e-36	304	197	0.87	0.595	2e-34	0.27565	0.63	UP
Pole	Pole	3.5e-36	41	12.2	0.27	0.084	2.2e-34	0.19127	1.74	UP
Spag5	Spag5	3.6e-36	35	9.9	0.25	0.068	2.3e-34	0.17917	1.83	UP
Ybx3	Ybx3	6.9e-36	179	97.6	0.64	0.348	4.3e-34	0.29098	0.88	UP
Ndufb8	Ndufb8	8e-36	210	129.9	0.8	0.484	5e-34	0.31838	0.69	UP
H2afv	H2afv	9.9e-36	473	236.5	0.78	0.561	6.2e-34	0.22348	1	UP
Tnfrsf9	Tnfrsf9	1e-35	109	37	0.33	0.115	6.5e-34	0.2101	1.56	UP
Rbmxl1	Rbmxl1	1.2e-35	99	55.1	0.58	0.281	7.6e-34	0.2944	0.84	UP
Cenps	Cenps	1.4e-35	36	11.1	0.27	0.085	8.7e-34	0.19022	1.7	UP
Arhgap11a	Arhgap11a	1.5e-35	57	20.6	0.32	0.108	9.3e-34	0.20686	1.48	UP
Hpf1	Hpf1	1.7e-35	136	74.3	0.62	0.324	1.1e-33	0.29213	0.87	UP
Cdkn2c	Cdkn2c	1.8e-35	57	21	0.31	0.105	1.1e-33	0.20569	1.44	UP
Rpl19	Rpl19	1.9e-35	3894	4836.7	1	0.999	1.2e-33	-0.00091	-0.31	DOWN
Ska1	Ska1	2.1e-35	37	11	0.25	0.071	1.3e-33	0.17942	1.75	UP
Sdf2l1	Sdf2l1	2.7e-35	73	35.1	0.45	0.192	1.6e-33	0.25712	1.05	UP
Raly	Raly	3.1e-35	310	202.5	0.89	0.614	1.8e-33	0.274	0.61	UP
Hjurp	Hjurp	3.2e-35	135	64.6	0.53	0.258	1.9e-33	0.26717	1.06	UP
Pa2g4	Pa2g4	3.4e-35	212	121	0.73	0.435	2e-33	0.2978	0.81	UP
Haus4	Haus4	4.1e-35	67	31.4	0.42	0.173	2.4e-33	0.24673	1.1	UP
Lsm3	Lsm3	4.2e-35	136	78.4	0.66	0.356	2.5e-33	0.30036	0.8	UP
Timeless	Timeless	4.5e-35	49	20	0.34	0.12	2.6e-33	0.21635	1.29	UP
Ubl4a	Ubl4a	4.5e-35	93	52	0.56	0.265	2.6e-33	0.29146	0.83	UP
Ncapd3	Ncapd3	6.8e-35	102	54.4	0.52	0.245	4e-33	0.27886	0.91	UP
Hist1h1e	Hist1h1e	1e-34	337	140	0.58	0.316	6e-33	0.2626	1.27	UP
Pbk	Pbk	1.2e-34	37	9.8	0.23	0.063	6.7e-33	0.16912	1.91	UP
Atad2	Atad2	1.6e-34	187	99.6	0.63	0.345	9.1e-33	0.28065	0.91	UP
Kif2c	Kif2c	1.6e-34	32	8.4	0.22	0.057	9.3e-33	0.1643	1.94	UP
Pdap1	Pdap1	1.7e-34	244	150.5	0.79	0.498	9.9e-33	0.29517	0.7	UP
Slc29a1	Slc29a1	2.5e-34	68	30.2	0.4	0.163	1.4e-32	0.23513	1.17	UP
Tceal9	Tceal9	2.6e-34	74	38.4	0.45	0.199	1.5e-32	0.25604	0.95	UP
Ckap5	Ckap5	2.7e-34	108	52.3	0.48	0.218	1.5e-32	0.25962	1.04	UP
E2f8	E2f8	2.8e-34	36	10.2	0.24	0.065	1.6e-32	0.17081	1.8	UP
Cfl1	Cfl1	3.2e-34	1550	1164.7	1	0.96	1.8e-32	0.03615	0.41	UP
Eif1ax	Eif1ax	3.2e-34	152	89.7	0.69	0.386	1.8e-32	0.30154	0.77	UP
Bub1	Bub1	4.3e-34	33	9.3	0.24	0.067	2.4e-32	0.17067	1.8	UP
Snrpa	Snrpa	4.4e-34	92	50.9	0.54	0.258	2.4e-32	0.28155	0.85	UP
Cdk4	Cdk4	5e-34	168	98.2	0.72	0.414	2.7e-32	0.30246	0.78	UP
Pold1	Pold1	6.8e-34	55	25.4	0.38	0.151	3.7e-32	0.23139	1.11	UP
Plk4	Plk4	1e-33	53	22.5	0.34	0.128	5.5e-32	0.21567	1.24	UP
Chaf1b	Chaf1b	1.1e-33	47	18.7	0.32	0.114	6.2e-32	0.20592	1.34	UP
Smdt1	Smdt1	1.7e-33	278	179.6	0.86	0.585	9e-32	0.277	0.63	UP
Hspa8	Hspa8	1.8e-33	1859	1375.3	0.99	0.975	9.7e-32	0.01606	0.43	UP
Ppih	Ppih	2e-33	62	31.6	0.43	0.183	1.1e-31	0.24682	0.98	UP
Sae1	Sae1	2.2e-33	98	56	0.58	0.284	1.2e-31	0.29125	0.81	UP
Bcl7c	Bcl7c	5.8e-33	86	50.7	0.53	0.251	3.1e-31	0.2774	0.77	UP
Rpl37	Rpl37	5.8e-33	3271	4218	1	0.996	3.1e-31	0.00277	-0.37	DOWN
Actb	Actb	5.9e-33	11173	8509.6	1	1	3.1e-31		0.39	UP
Rfc2	Rfc2	7.6e-33	116	65.3	0.57	0.291	4e-31	0.28298	0.83	UP
Rps10	Rps10	8.8e-33	4118	5171.9	1	0.999	4.6e-31	0.00053	-0.33	DOWN
Brca2	Brca2	9.7e-33	40	14.4	0.28	0.093	5.1e-31	0.18756	1.49	UP
E2f1	E2f1	1.7e-32	36	11.2	0.24	0.068	9.1e-31	0.16766	1.7	UP
Cd4	Cd4	1.9e-32	74	22.6	0.25	0.076	1e-30	0.17181	1.72	UP
Rps15a	Rps15a	2.2e-32	4482	5721.9	1	0.999	1.2e-30	0.00105	-0.35	DOWN
Ndufb7	Ndufb7	2.9e-32	339	220.3	0.87	0.627	1.5e-30	0.24451	0.62	UP
Dynll2	Dynll2	3e-32	81	44.4	0.49	0.227	1.5e-30	0.26076	0.88	UP
Pgk1	Pgk1	4.1e-32	230	136.3	0.77	0.476	2.1e-30	0.29225	0.75	UP
C330027C09Rik	C330027C09Rik	4.5e-32	36	11.1	0.25	0.075	2.3e-30	0.1709	1.7	UP
Tkt	Tkt	5.8e-32	239	150.2	0.79	0.511	3e-30	0.27916	0.67	UP
Mrpl51	Mrpl51	6.4e-32	133	80.2	0.67	0.368	3.2e-30	0.29979	0.73	UP
Pbdc1	Pbdc1	7e-32	94	53.8	0.55	0.273	3.5e-30	0.27547	0.81	UP
Anln	Anln	1e-31	36	10.2	0.2	0.053	5.1e-30	0.15177	1.84	UP
Pdia6	Pdia6	1.1e-31	140	79.4	0.61	0.335	5.5e-30	0.27481	0.82	UP
Hist1h3e	Hist1h3e	1.1e-31	69	23.1	0.28	0.095	5.5e-30	0.18311	1.58	UP
Mthfd2	Mthfd2	1.2e-31	73	37.9	0.45	0.199	6.1e-30	0.24832	0.94	UP
Pgam1	Pgam1	1.2e-31	140	81.1	0.65	0.355	6.2e-30	0.29081	0.78	UP
Ncaph2	Ncaph2	1.3e-31	89	50.3	0.53	0.256	6.5e-30	0.27215	0.83	UP
Wdr76	Wdr76	1.4e-31	56	24.8	0.35	0.137	7e-30	0.21158	1.18	UP
Acot7	Acot7	1.7e-31	83	48.2	0.5	0.235	8.4e-30	0.2653	0.78	UP
Commd1	Commd1	2.1e-31	80	44.4	0.5	0.239	1e-29	0.26215	0.85	UP
Cox7a2	Cox7a2	2.3e-31	429	292.5	0.9	0.724	1.1e-29	0.17569	0.55	UP
Prelid3b	Prelid3b	2.4e-31	68	35.9	0.45	0.199	1.2e-29	0.24688	0.93	UP
Pomp	Pomp	3.1e-31	343	235.8	0.89	0.651	1.5e-29	0.24441	0.54	UP
Magoh	Magoh	3.1e-31	182	111.4	0.73	0.444	1.5e-29	0.2903	0.71	UP
Mrpl18	Mrpl18	3.4e-31	197	124.7	0.76	0.474	1.6e-29	0.28716	0.66	UP
Lyar	Lyar	3.6e-31	107	57.9	0.53	0.264	1.7e-29	0.2623	0.88	UP
Atp5j2	Atp5j2	3.8e-31	566	407.2	0.95	0.811	1.8e-29	0.13738	0.47	UP
G3bp1	G3bp1	4e-31	254	166	0.84	0.555	1.9e-29	0.28629	0.61	UP
Rpl34	Rpl34	4.1e-31	3173	3892.4	1	0.999	2e-29	0.00105	-0.3	DOWN
Psma4	Psma4	4.1e-31	233	151.5	0.8	0.521	2e-29	0.28303	0.62	UP
Cdca2	Cdca2	5.1e-31	43	13.7	0.24	0.074	2.4e-29	0.16763	1.64	UP
Il7r	Il7r	6.1e-31	126	370.4	0.32	0.532	2.9e-29	-0.20805	-1.56	DOWN
Casp3	Casp3	8e-31	81	41.3	0.42	0.183	3.8e-29	0.23387	0.98	UP
Atp5f1	Atp5f1	9.1e-31	403	284	0.92	0.727	4.3e-29	0.19699	0.51	UP
Arl4c	Arl4c	1.8e-30	175	365.1	0.61	0.719	8.6e-29	-0.11023	-1.06	DOWN
Ung	Ung	1.9e-30	49	19.5	0.29	0.106	8.8e-29	0.18882	1.31	UP
Cbx3	Cbx3	2e-30	318	204.3	0.85	0.605	9.2e-29	0.2484	0.64	UP
Nup62	Nup62	2.3e-30	54	27.8	0.39	0.163	1.1e-28	0.22506	0.95	UP
Dbf4	Dbf4	2.5e-30	86	44.8	0.44	0.204	1.2e-28	0.23784	0.93	UP
Cisd1	Cisd1	2.7e-30	76	39.7	0.45	0.208	1.2e-28	0.24135	0.93	UP
Nans	Nans	3.3e-30	99	61.4	0.58	0.297	1.5e-28	0.28099	0.69	UP
Hist1h3a	Hist1h3a	3.6e-30	38	13.8	0.26	0.085	1.6e-28	0.17295	1.48	UP
Topbp1	Topbp1	4.2e-30	102	60.3	0.55	0.276	1.9e-28	0.27376	0.76	UP
Nop58	Nop58	4.2e-30	238	140.3	0.74	0.466	1.9e-28	0.27634	0.76	UP
Cdc6	Cdc6	4.4e-30	36	12	0.24	0.073	2e-28	0.16437	1.58	UP
Snu13	Snu13	4.7e-30	246	158.9	0.84	0.551	2.1e-28	0.28618	0.63	UP
Psmb6	Psmb6	4.7e-30	222	143.4	0.81	0.523	2.1e-28	0.28721	0.63	UP
Spdl1	Spdl1	5.5e-30	28	8.5	0.21	0.056	2.5e-28	0.14953	1.74	UP
Ptms	Ptms	7.5e-30	157	81.9	0.51	0.258	3.4e-28	0.2499	0.94	UP
Hmgn5	Hmgn5	8.6e-30	96	51.5	0.48	0.232	3.8e-28	0.24596	0.89	UP
Ccnf	Ccnf	9.3e-30	32	9.3	0.21	0.06	4.1e-28	0.15161	1.8	UP
Mcm10	Mcm10	9.3e-30	26	8	0.21	0.058	4.1e-28	0.1503	1.73	UP
Uqcr10	Uqcr10	1e-29	330	220	0.86	0.638	4.5e-28	0.22681	0.58	UP
Psmb2	Psmb2	1.3e-29	210	136.2	0.78	0.494	5.9e-28	0.28106	0.63	UP
Rpl38	Rpl38	1.5e-29	3536	4699	1	0.999	6.7e-28	0.00105	-0.41	DOWN
Wdhd1	Wdhd1	1.6e-29	42	16.2	0.27	0.095	7e-28	0.17827	1.36	UP
Hprt	Hprt	1.6e-29	151	92.3	0.68	0.394	7.2e-28	0.28555	0.71	UP
Psmb5	Psmb5	1.7e-29	241	158	0.83	0.549	7.5e-28	0.27729	0.61	UP
Rpl39	Rpl39	1.7e-29	4152	5275.8	1	0.998	7.5e-28	0.0021	-0.35	DOWN
Calr	Calr	1.9e-29	499	326.3	0.89	0.692	8.4e-28	0.20342	0.61	UP
Rpl12	Rpl12	2.3e-29	3413	4501.2	1	0.998	1e-27	0.00066	-0.4	DOWN
Tubg1	Tubg1	2.4e-29	46	20.1	0.32	0.121	1e-27	0.19516	1.21	UP
Elob	Elob	2.5e-29	521	372.9	0.93	0.789	1.1e-27	0.14309	0.48	UP
Ube2l3	Ube2l3	2.6e-29	232	150	0.81	0.529	1.1e-27	0.27712	0.63	UP
Mif	Mif	2.7e-29	596	357.4	0.89	0.714	1.1e-27	0.17704	0.74	UP
Aurka	Aurka	3.2e-29	33	9.3	0.21	0.062	1.4e-27	0.15094	1.84	UP
Hspd1	Hspd1	3.3e-29	304	170.3	0.75	0.494	1.4e-27	0.25516	0.84	UP
Pgp	Pgp	3.7e-29	78	43.2	0.46	0.214	1.6e-27	0.24316	0.86	UP
Manf	Manf	4.1e-29	176	108.1	0.72	0.425	1.7e-27	0.29143	0.7	UP
Depdc1a	Depdc1a	5.6e-29	34	9.9	0.21	0.058	2.4e-27	0.14743	1.78	UP
Mrpl28	Mrpl28	6.2e-29	85	50.7	0.53	0.265	2.6e-27	0.26897	0.74	UP
Tcp1	Tcp1	6.7e-29	225	145.9	0.79	0.51	2.8e-27	0.284	0.62	UP
Ccdc124	Ccdc124	7.1e-29	107	66.7	0.6	0.321	2.9e-27	0.27893	0.69	UP
Syce2	Syce2	8.1e-29	30	10.4	0.23	0.074	3.4e-27	0.16044	1.55	UP
Hist2h2ac	Hist2h2ac	9.3e-29	124	49.8	0.39	0.18	3.9e-27	0.21113	1.32	UP
Suz12	Suz12	9.6e-29	139	86.4	0.65	0.362	4e-27	0.28739	0.68	UP
Atp5o.1	Atp5o.1	1e-28	298	204.1	0.87	0.618	4.3e-27	0.25253	0.54	UP
Kdelr2	Kdelr2	1.1e-28	62	34.8	0.43	0.193	4.5e-27	0.23592	0.83	UP
Ipo5	Ipo5	1.4e-28	76	39.6	0.44	0.209	5.7e-27	0.23455	0.94	UP
Mrpl42	Mrpl42	1.5e-28	124	78.5	0.66	0.365	6.1e-27	0.29378	0.66	UP
Hist1h2bm	Hist1h2bm	1.7e-28	38	11.4	0.21	0.06	7e-27	0.14729	1.74	UP
Poc1a	Poc1a	1.8e-28	22	7.3	0.21	0.059	7.5e-27	0.1469	1.59	UP
Bex3	Bex3	2e-28	87	51.6	0.5	0.248	8.1e-27	0.25465	0.75	UP
Snrpd2	Snrpd2	2.3e-28	347	238.1	0.88	0.663	9.1e-27	0.21741	0.54	UP
Nudt4	Nudt4	2.3e-28	71	37.9	0.42	0.189	9.3e-27	0.22665	0.92	UP
Cenpp	Cenpp	2.4e-28	27	7.9	0.2	0.058	9.8e-27	0.14507	1.78	UP
Tmem256	Tmem256	2.5e-28	115	72.2	0.62	0.34	1e-26	0.28303	0.67	UP
Snrpa1	Snrpa1	2.6e-28	115	70.9	0.61	0.329	1e-26	0.27915	0.7	UP
Ncl	Ncl	2.8e-28	1171	727.1	0.97	0.872	1.1e-26	0.09513	0.69	UP
Rad21	Rad21	3e-28	197	110.6	0.66	0.405	1.2e-26	0.25384	0.83	UP
Supt16	Supt16	3.4e-28	187	122.9	0.76	0.47	1.4e-26	0.28705	0.6	UP
Trip13	Trip13	3.9e-28	27	9	0.22	0.067	1.5e-26	0.15288	1.59	UP
Snx3	Snx3	4.1e-28	191	126.1	0.76	0.479	1.6e-26	0.28047	0.6	UP
Hist1h4i	Hist1h4i	5.5e-28	56	23.9	0.32	0.129	2.1e-26	0.19159	1.23	UP
Brip1	Brip1	5.8e-28	31	9.8	0.22	0.066	2.3e-26	0.15014	1.65	UP
Rpl36	Rpl36	6.4e-28	2684	3383.9	1	1	2.5e-26		-0.33	DOWN
Pdia3	Pdia3	6.7e-28	244	156.9	0.78	0.523	2.6e-26	0.25844	0.64	UP
Rcc1	Rcc1	1.1e-27	34	14.6	0.26	0.092	4.2e-26	0.16991	1.23	UP
Nelfe	Nelfe	1.2e-27	53	26.1	0.36	0.153	4.6e-26	0.20627	1.01	UP
Rcc2	Rcc2	1.3e-27	117	69.7	0.59	0.318	4.8e-26	0.27201	0.74	UP
Anxa2	Anxa2	1.4e-27	376	200.5	0.62	0.4	5.5e-26	0.22313	0.91	UP
Ube2n	Ube2n	1.6e-27	126	80.3	0.65	0.367	6e-26	0.28592	0.65	UP
Timm50	Timm50	1.9e-27	57	32.7	0.41	0.186	7.4e-26	0.22693	0.79	UP
Snrpb	Snrpb	2e-27	334	231.8	0.88	0.652	7.8e-26	0.23329	0.53	UP
Samd1	Samd1	2.1e-27	54	24.7	0.34	0.142	8e-26	0.19716	1.12	UP
Smarcc1	Smarcc1	2.2e-27	119	73.5	0.59	0.321	8.5e-26	0.27029	0.7	UP
Eif4a3	Eif4a3	2.5e-27	140	89.9	0.67	0.384	9.6e-26	0.28493	0.64	UP
Cdc7	Cdc7	3.4e-27	34	12.8	0.26	0.092	1.3e-25	0.16795	1.4	UP
Hist1h1a	Hist1h1a	3.7e-27	47	17.1	0.23	0.077	1.4e-25	0.15637	1.46	UP
Dnajc9	Dnajc9	3.7e-27	203	131.3	0.72	0.446	1.4e-25	0.27237	0.63	UP
U2af1	U2af1	3.9e-27	175	112	0.72	0.439	1.4e-25	0.28443	0.64	UP
Sept7	Sept7	4.4e-27	375	259.4	0.91	0.673	1.6e-25	0.23817	0.53	UP
Impdh2	Impdh2	4.7e-27	157	100.3	0.67	0.399	1.8e-25	0.27454	0.65	UP
Cnih4	Cnih4	4.9e-27	65	37.9	0.42	0.194	1.8e-25	0.22571	0.78	UP
Ndufc2	Ndufc2	5.1e-27	170	112.5	0.73	0.447	1.9e-25	0.27943	0.6	UP
H3f3a	H3f3a	5.8e-27	1183	893	1	0.95	2.2e-25	0.04757	0.41	UP
Plp2	Plp2	6.1e-27	56	28.3	0.37	0.162	2.2e-25	0.20793	0.98	UP
Ywhae	Ywhae	6.3e-27	297	200.3	0.83	0.593	2.3e-25	0.23982	0.57	UP
Dck	Dck	7.3e-27	53	28.6	0.37	0.162	2.7e-25	0.20885	0.9	UP
Rpa3	Rpa3	1.1e-26	63	35.8	0.42	0.194	4.1e-25	0.22624	0.82	UP
Cox7a2l	Cox7a2l	1.2e-26	296	467.4	0.86	0.864	4.3e-25	-0.00203	-0.66	DOWN
Psmd12	Psmd12	1.2e-26	118	75.8	0.62	0.343	4.3e-25	0.27412	0.64	UP
Umps	Umps	1.2e-26	50	24.7	0.35	0.148	4.4e-25	0.20001	1.02	UP
Psma1	Psma1	1.3e-26	179	117.4	0.73	0.455	4.7e-25	0.27443	0.61	UP
Calm1	Calm1	1.4e-26	1299	1004.6	0.99	0.949	4.9e-25	0.03855	0.37	UP
Rnf26	Rnf26	1.4e-26	40	17.5	0.28	0.105	5e-25	0.17456	1.18	UP
Slc43a3	Slc43a3	1.5e-26	35	12.3	0.22	0.072	5.3e-25	0.15103	1.53	UP
Dazap1	Dazap1	1.5e-26	135	86.6	0.65	0.374	5.5e-25	0.27674	0.64	UP
Pcbp1	Pcbp1	1.6e-26	275	184.7	0.84	0.592	5.7e-25	0.25291	0.57	UP
Eif2s1	Eif2s1	1.7e-26	142	91.6	0.68	0.398	6e-25	0.27938	0.64	UP
Hspa5	Hspa5	1.8e-26	438	286.6	0.88	0.647	6.2e-25	0.23514	0.61	UP
Racgap1	Racgap1	2.2e-26	159	84.7	0.55	0.314	7.9e-25	0.23828	0.91	UP
Ndufv2	Ndufv2	2.7e-26	147	94.6	0.7	0.419	9.4e-25	0.2785	0.63	UP
Kifc1	Kifc1	2.7e-26	28	8.9	0.2	0.061	9.5e-25	0.1414	1.64	UP
Stip1	Stip1	2.8e-26	117	74.5	0.61	0.342	9.7e-25	0.26851	0.65	UP
Smc1a	Smc1a	3e-26	290	191.5	0.81	0.564	1.1e-24	0.24714	0.6	UP
Glrx5	Glrx5	3.2e-26	139	83.3	0.61	0.348	1.1e-24	0.26599	0.74	UP
Eea1	Eea1	3.9e-26	86	43.7	0.4	0.187	1.4e-24	0.21201	0.98	UP
Cenpl	Cenpl	4.1e-26	34	12.7	0.24	0.08	1.4e-24	0.15557	1.41	UP
Nsmce4a	Nsmce4a	4.2e-26	134	89.6	0.67	0.389	1.4e-24	0.28452	0.58	UP
Nhp2	Nhp2	4.3e-26	190	117.5	0.69	0.421	1.5e-24	0.27117	0.69	UP
P4hb	P4hb	5.1e-26	105	65.6	0.57	0.308	1.8e-24	0.26473	0.67	UP
Snrpc	Snrpc	6.1e-26	147	99.1	0.7	0.416	2.1e-24	0.28453	0.57	UP
Lgals1	Lgals1	6.1e-26	1764	1016.3	0.83	0.649	2.1e-24	0.17836	0.8	UP
Psmc5	Psmc5	6.4e-26	121	79.5	0.65	0.368	2.2e-24	0.28343	0.61	UP
Prmt1	Prmt1	7.3e-26	139	85.6	0.64	0.374	2.5e-24	0.26523	0.7	UP
Ndufab1	Ndufab1	7.6e-26	148	96.4	0.7	0.416	2.6e-24	0.28022	0.62	UP
Hist1h4d	Hist1h4d	8e-26	180	77.7	0.43	0.216	2.7e-24	0.20992	1.21	UP
Cdt1	Cdt1	8.1e-26	64	35.1	0.4	0.183	2.7e-24	0.21281	0.86	UP
Uchl5	Uchl5	8.3e-26	70	40.9	0.45	0.219	2.8e-24	0.23123	0.78	UP
Kpna3	Kpna3	1e-25	49	27.5	0.35	0.152	3.4e-24	0.20157	0.84	UP
Kmt5a	Kmt5a	1.1e-25	123	77.1	0.6	0.332	3.7e-24	0.2641	0.67	UP
mt-Nd2	mt-Nd2	1.5e-25	1770	2280.1	1	0.993	4.8e-24	0.00448	-0.37	DOWN
Ndufa12	Ndufa12	1.5e-25	170	113.1	0.72	0.44	5e-24	0.28391	0.59	UP
Tmem14c	Tmem14c	1.5e-25	214	135.3	0.77	0.497	5.1e-24	0.26888	0.66	UP
Klf2	Klf2	1.5e-25	383	648	0.7	0.809	5.1e-24	-0.10565	-0.76	DOWN
Minos1	Minos1	1.6e-25	246	172.6	0.84	0.573	5.4e-24	0.26554	0.51	UP
Cenpx	Cenpx	1.7e-25	148	97.4	0.67	0.397	5.6e-24	0.27036	0.6	UP
Mrps18c	Mrps18c	1.7e-25	99	65.4	0.59	0.315	5.7e-24	0.27176	0.6	UP
Kpna2	Kpna2	2e-25	42	15.8	0.25	0.088	6.5e-24	0.15829	1.4	UP
Snrnp40	Snrnp40	2.1e-25	88	54.3	0.54	0.283	6.8e-24	0.25254	0.69	UP
Hmbs	Hmbs	2.3e-25	91	46.3	0.39	0.179	7.4e-24	0.20982	0.98	UP
Ndufa11	Ndufa11	2.7e-25	198	135.6	0.78	0.5	8.9e-24	0.28444	0.55	UP
Mrpl12	Mrpl12	2.9e-25	137	84.8	0.65	0.377	9.5e-24	0.27215	0.69	UP
Psmd13	Psmd13	2.9e-25	133	87	0.66	0.388	9.5e-24	0.27694	0.61	UP
Polr2f	Polr2f	3e-25	146	95.5	0.67	0.4	9.8e-24	0.27493	0.62	UP
Mns1	Mns1	3.1e-25	55	29.1	0.37	0.163	1e-23	0.20204	0.92	UP
Alad	Alad	3.1e-25	63	30.4	0.35	0.152	1e-23	0.19346	1.05	UP
Cdca7l	Cdca7l	3.5e-25	49	25.9	0.34	0.149	1.1e-23	0.19517	0.92	UP
Serbp1	Serbp1	4.5e-25	1043	769.1	0.98	0.915	1.4e-23	0.0693	0.44	UP
Hspa14	Hspa14	5.1e-25	87	55.1	0.53	0.273	1.6e-23	0.2548	0.65	UP
Chchd2	Chchd2	5.3e-25	673	510.4	0.99	0.865	1.7e-23	0.12301	0.4	UP
Dpy30	Dpy30	5.4e-25	91	57.8	0.54	0.285	1.7e-23	0.25188	0.66	UP
Etfb	Etfb	5.7e-25	123	79.8	0.61	0.35	1.8e-23	0.26101	0.63	UP
Gars	Gars	6.5e-25	95	59.9	0.54	0.29	2.1e-23	0.25146	0.66	UP
Lsm4	Lsm4	7.1e-25	291	206	0.86	0.615	2.2e-23	0.24077	0.5	UP
Psma2	Psma2	8.4e-25	338	242.9	0.9	0.682	2.7e-23	0.22204	0.48	UP
Uqcrq	Uqcrq	1.1e-24	340	242.2	0.88	0.67	3.5e-23	0.21058	0.49	UP
Naa50	Naa50	1.3e-24	77	48.7	0.49	0.253	3.9e-23	0.24221	0.67	UP
Larp7	Larp7	1.3e-24	108	71.8	0.57	0.312	4.2e-23	0.25765	0.58	UP
Rnaseh2c	Rnaseh2c	1.5e-24	187	127.1	0.75	0.476	4.6e-23	0.27551	0.56	UP
Cdk2	Cdk2	1.8e-24	34	15.1	0.25	0.091	5.5e-23	0.15801	1.15	UP
Dtymk	Dtymk	1.8e-24	92	54.9	0.5	0.267	5.7e-23	0.23469	0.74	UP
Cox8a	Cox8a	2.1e-24	886	686.2	0.97	0.91	6.6e-23	0.06448	0.37	UP
Ska2	Ska2	2.4e-24	31	13.9	0.24	0.089	7.6e-23	0.1558	1.15	UP
Tex30	Tex30	2.7e-24	39	20	0.31	0.13	8.2e-23	0.181	0.97	UP
Blvra	Blvra	2.8e-24	50	29.3	0.37	0.169	8.7e-23	0.20398	0.78	UP
Wee1	Wee1	2.9e-24	25	8.8	0.2	0.065	9e-23	0.1368	1.49	UP
Jpt1	Jpt1	2.9e-24	461	313.5	0.92	0.716	9e-23	0.1994	0.56	UP
Hnrnpf	Hnrnpf	3e-24	668	515.7	0.97	0.865	9e-23	0.10863	0.37	UP
Cacybp	Cacybp	3.1e-24	156	99.7	0.68	0.413	9.4e-23	0.26519	0.64	UP
Rpl9	Rpl9	3.1e-24	3122	3791.4	1	0.997	9.5e-23	0.00263	-0.28	DOWN
Pole3	Pole3	3.2e-24	55	31.7	0.39	0.181	9.6e-23	0.20628	0.79	UP
Ndufb6	Ndufb6	3.3e-24	118	77.2	0.62	0.352	9.9e-23	0.27003	0.61	UP
E2f3	E2f3	3.4e-24	32	14	0.24	0.088	1e-22	0.15488	1.21	UP
Mtch1	Mtch1	3.6e-24	100	64.2	0.54	0.296	1.1e-22	0.24463	0.65	UP
Sf3b5	Sf3b5	3.7e-24	187	129.8	0.77	0.491	1.1e-22	0.27898	0.52	UP
Cct5	Cct5	3.8e-24	289	203.2	0.86	0.625	1.1e-22	0.23419	0.51	UP
Rps7	Rps7	4.2e-24	3693	4582.1	1	0.999	1.3e-22	0.00105	-0.31	DOWN
Ube2e3	Ube2e3	4.6e-24	47	24.3	0.32	0.14	1.4e-22	0.18396	0.95	UP
Fh1	Fh1	5.2e-24	62	37	0.43	0.21	1.6e-22	0.22055	0.75	UP
Psma7	Psma7	5.5e-24	472	344.2	0.93	0.767	1.6e-22	0.1666	0.46	UP
Fxn	Fxn	5.5e-24	42	21.6	0.31	0.131	1.6e-22	0.18086	0.96	UP
Hcst	Hcst	5.8e-24	280	496.8	0.82	0.821	1.7e-22	0.00169	-0.83	DOWN
Snrpf	Snrpf	5.9e-24	426	307.2	0.92	0.73	1.7e-22	0.189	0.47	UP
Nudt21	Nudt21	6e-24	148	102	0.7	0.428	1.8e-22	0.27245	0.54	UP
Ripor2	Ripor2	6.4e-24	126	256.7	0.56	0.655	1.9e-22	-0.09648	-1.03	DOWN
Hnrnpk	Hnrnpk	6.4e-24	461	350.2	0.96	0.785	1.9e-22	0.17176	0.4	UP
Impa2	Impa2	6.5e-24	34	15.8	0.27	0.102	1.9e-22	0.16372	1.11	UP
Mrpl20	Mrpl20	6.7e-24	139	90.6	0.66	0.395	2e-22	0.26383	0.61	UP
Rps9	Rps9	6.8e-24	3343	4059.8	1	0.998	2e-22	0.00158	-0.28	DOWN
Psmb4	Psmb4	7.1e-24	240	169	0.82	0.565	2.1e-22	0.25525	0.51	UP
Brca1	Brca1	7.1e-24	29	10	0.2	0.065	2.1e-22	0.13537	1.52	UP
Ndufs8	Ndufs8	7.2e-24	116	75.5	0.6	0.343	2.1e-22	0.25398	0.62	UP
Ablim1	Ablim1	7.4e-24	241	393.8	0.8	0.811	2.1e-22	-0.01226	-0.71	DOWN
Higd1a	Higd1a	7.9e-24	163	113	0.74	0.449	2.3e-22	0.28649	0.53	UP
Prelid1	Prelid1	8.1e-24	252	171	0.81	0.565	2.3e-22	0.24033	0.56	UP
Atp5g1	Atp5g1	8.1e-24	375	257.3	0.87	0.667	2.3e-22	0.20745	0.55	UP
Elof1	Elof1	9.9e-24	85	54.2	0.52	0.271	2.8e-22	0.24396	0.66	UP
Psmc4	Psmc4	1.1e-23	127	88.9	0.68	0.394	3.2e-22	0.28555	0.52	UP
Ube2t	Ube2t	1.2e-23	39	17.5	0.28	0.114	3.3e-22	0.16707	1.15	UP
Rps16	Rps16	1.4e-23	5090	6241.1	1	1	3.9e-22		-0.29	DOWN
Stub1	Stub1	1.4e-23	100	65.1	0.57	0.312	4e-22	0.25765	0.62	UP
Rbbp4	Rbbp4	1.5e-23	203	137.2	0.75	0.494	4.4e-22	0.25516	0.56	UP
Ndufs6	Ndufs6	1.6e-23	195	133.8	0.76	0.492	4.5e-22	0.27073	0.54	UP
Txnl1	Txnl1	1.9e-23	123	80.6	0.63	0.37	5.4e-22	0.26027	0.61	UP
Psmd14	Psmd14	1.9e-23	103	67.8	0.57	0.32	5.5e-22	0.25408	0.61	UP
Irf8	Irf8	2.3e-23	95	48.9	0.36	0.171	6.5e-22	0.19272	0.96	UP
Cyc1	Cyc1	2.3e-23	137	90.7	0.67	0.399	6.5e-22	0.26682	0.6	UP
Clic1	Clic1	2.5e-23	759	539.2	0.93	0.85	6.8e-22	0.07979	0.49	UP
Psmc2	Psmc2	2.6e-23	104	69.8	0.61	0.34	7.4e-22	0.2672	0.57	UP
Uqcc2	Uqcc2	2.7e-23	135	91.5	0.65	0.382	7.4e-22	0.26886	0.56	UP
Shmt2	Shmt2	2.7e-23	60	33	0.38	0.178	7.6e-22	0.20028	0.87	UP
Ap2s1	Ap2s1	2.8e-23	168	111.2	0.69	0.434	7.6e-22	0.26	0.6	UP
Ywhaq	Ywhaq	3e-23	242	169.5	0.81	0.565	8.2e-22	0.24661	0.52	UP
Txnip	Txnip	3.1e-23	103	231	0.48	0.596	8.6e-22	-0.11873	-1.16	DOWN
Xpo1	Xpo1	3.3e-23	81	52.7	0.49	0.255	9.1e-22	0.23814	0.61	UP
Rpl23	Rpl23	3.3e-23	4836	5906.9	1	1	9.1e-22		-0.29	DOWN
Ssna1	Ssna1	3.5e-23	99	65	0.56	0.305	9.7e-22	0.25061	0.6	UP
Rbbp8	Rbbp8	3.6e-23	44	24.5	0.32	0.137	9.8e-22	0.18083	0.84	UP
Ptpn7	Ptpn7	3.7e-23	132	86.7	0.63	0.368	1e-21	0.26185	0.61	UP
Cox6c	Cox6c	5.1e-23	640	506	0.97	0.864	1.4e-21	0.10157	0.34	UP
Pdcd4	Pdcd4	5.4e-23	258	445.2	0.69	0.76	1.5e-21	-0.07064	-0.79	DOWN
Cox7c	Cox7c	5.5e-23	651	508.5	0.97	0.86	1.5e-21	0.11244	0.36	UP
Rps28	Rps28	6.1e-23	2584	3539.3	0.99	0.991	1.6e-21	0.00174	-0.45	DOWN
Chchd1	Chchd1	6.1e-23	120	77.6	0.62	0.359	1.7e-21	0.25639	0.63	UP
Gm2682	Gm2682	6.9e-23	113	250.4	0.5	0.611	1.9e-21	-0.10754	-1.15	DOWN
Nudt5	Nudt5	6.9e-23	70	44.6	0.46	0.231	1.9e-21	0.22687	0.64	UP
Psmb7	Psmb7	7.2e-23	120	79.5	0.62	0.363	1.9e-21	0.26188	0.6	UP
Phf5a	Phf5a	7.5e-23	134	88.7	0.65	0.385	2e-21	0.2657	0.59	UP
Stoml2	Stoml2	7.7e-23	57	34.3	0.41	0.199	2.1e-21	0.20804	0.74	UP
Lsm5	Lsm5	8.8e-23	173	115.7	0.7	0.441	2.3e-21	0.25499	0.58	UP
Rps13	Rps13	9.4e-23	3545	4303	1	0.999	2.5e-21	0.00053	-0.28	DOWN
Tuba4a	Tuba4a	9.5e-23	131	80.9	0.57	0.328	2.5e-21	0.24476	0.7	UP
Rpl24	Rpl24	1.1e-22	2081	2484.5	1	0.994	2.8e-21	0.00146	-0.26	DOWN
Anapc5	Anapc5	1.1e-22	182	122.8	0.72	0.457	2.9e-21	0.26278	0.57	UP
Ptges3	Ptges3	1.2e-22	155	105.3	0.69	0.423	3.1e-21	0.26763	0.56	UP
Hist1h2bc	Hist1h2bc	1.3e-22	33	12.2	0.21	0.073	3.5e-21	0.13703	1.42	UP
Mms22l	Mms22l	1.4e-22	34	16.5	0.26	0.105	3.6e-21	0.15874	1.03	UP
Fzr1	Fzr1	1.4e-22	59	32.2	0.36	0.17	3.7e-21	0.19233	0.86	UP
Gen1	Gen1	1.6e-22	26	9.6	0.2	0.068	4.1e-21	0.13365	1.44	UP
Etf1	Etf1	1.6e-22	99	64.9	0.56	0.311	4.1e-21	0.24627	0.61	UP
Hnrnpu	Hnrnpu	1.8e-22	589	435.1	0.95	0.81	4.6e-21	0.13934	0.44	UP
Sdhb	Sdhb	2e-22	168	116.7	0.72	0.459	5.2e-21	0.25871	0.52	UP
1810037I17Rik	1810037I17Rik	2.8e-22	226	153.8	0.75	0.516	7.3e-21	0.22982	0.55	UP
Pcbd2	Pcbd2	2.8e-22	79	50.1	0.46	0.241	7.3e-21	0.22067	0.66	UP
Hnrnpa2b1	Hnrnpa2b1	2.8e-22	831	635.6	0.98	0.879	7.3e-21	0.10124	0.39	UP
Ndufc1	Ndufc1	2.9e-22	170	116.4	0.71	0.449	7.4e-21	0.25718	0.55	UP
Mrpl13	Mrpl13	3e-22	82	56	0.52	0.28	7.7e-21	0.24274	0.56	UP
Suv39h1	Suv39h1	3.2e-22	35	18.8	0.28	0.113	8.2e-21	0.16472	0.91	UP
Blm	Blm	3.5e-22	36	16.2	0.26	0.102	9e-21	0.15508	1.14	UP
Psmd7	Psmd7	3.6e-22	129	85.7	0.63	0.368	9.2e-21	0.25806	0.59	UP
Pin1	Pin1	4.3e-22	83	54.5	0.51	0.275	1.1e-20	0.23452	0.6	UP
Rpl27a	Rpl27a	4.4e-22	4112	4947.3	1	1	1.1e-20		-0.27	DOWN
Ddx1	Ddx1	4.9e-22	59	34.9	0.4	0.193	1.2e-20	0.20374	0.75	UP
Metap2	Metap2	4.9e-22	222	148.9	0.77	0.524	1.3e-20	0.24587	0.58	UP
Swi5	Swi5	5e-22	203	140.9	0.77	0.516	1.3e-20	0.25663	0.53	UP
Acsl5	Acsl5	5.2e-22	86	54.2	0.49	0.259	1.3e-20	0.22779	0.66	UP
Emc8	Emc8	6.9e-22	52	30.8	0.37	0.177	1.7e-20	0.1961	0.74	UP
Sept11	Sept11	7.5e-22	170	118.2	0.68	0.417	1.9e-20	0.26243	0.53	UP
Reep5	Reep5	8.6e-22	242	166.1	0.75	0.501	2.2e-20	0.24741	0.54	UP
Maz	Maz	8.6e-22	138	93	0.64	0.388	2.2e-20	0.25536	0.57	UP
Zfpm1	Zfpm1	8.7e-22	88	56	0.48	0.257	2.2e-20	0.22361	0.65	UP
Snrnp25	Snrnp25	9e-22	41	23.1	0.32	0.142	2.3e-20	0.17702	0.81	UP
Nxt1	Nxt1	9.4e-22	61	40.9	0.43	0.217	2.3e-20	0.21372	0.59	UP
Psma5	Psma5	9.5e-22	153	107.1	0.71	0.444	2.4e-20	0.26532	0.52	UP
Bard1	Bard1	1.1e-21	27	11.5	0.21	0.073	2.8e-20	0.13468	1.24	UP
Nubp1	Nubp1	1.1e-21	91	59.4	0.54	0.296	2.8e-20	0.24032	0.62	UP
Maf	Maf	1.2e-21	111	47.3	0.25	0.101	2.9e-20	0.14947	1.23	UP
Bcl2	Bcl2	1.2e-21	160	357.6	0.51	0.617	3e-20	-0.10325	-1.16	DOWN
Timm8a1	Timm8a1	1.2e-21	60	32.5	0.37	0.177	3.1e-20	0.18838	0.88	UP
Atp5a1	Atp5a1	1.4e-21	429	326.4	0.93	0.766	3.4e-20	0.16765	0.39	UP
Cox6a1	Cox6a1	1.5e-21	314	226.3	0.87	0.658	3.7e-20	0.21207	0.47	UP
Smco4	Smco4	1.5e-21	56	28.3	0.32	0.145	3.8e-20	0.17295	0.99	UP
Mapre1	Mapre1	1.5e-21	179	126.4	0.74	0.474	3.8e-20	0.2627	0.5	UP
Vdac1	Vdac1	1.6e-21	107	68.2	0.56	0.318	4e-20	0.23695	0.65	UP
Rdm1	Rdm1	1.7e-21	55	28.6	0.32	0.143	4.1e-20	0.17361	0.96	UP
Mrpl17	Mrpl17	1.7e-21	70	43.8	0.46	0.236	4.1e-20	0.21965	0.68	UP
Cox6b1	Cox6b1	1.8e-21	455	346	0.93	0.782	4.3e-20	0.14273	0.39	UP
Eny2	Eny2	1.9e-21	128	87.2	0.65	0.389	4.5e-20	0.25954	0.55	UP
Mthfd1	Mthfd1	1.9e-21	40	20.5	0.28	0.12	4.6e-20	0.1622	0.95	UP
Bora	Bora	1.9e-21	35	15.8	0.25	0.102	4.6e-20	0.15077	1.14	UP
Kif18a	Kif18a	1.9e-21	33	13	0.2	0.072	4.6e-20	0.13232	1.34	UP
Fundc2	Fundc2	2e-21	138	95.7	0.66	0.4	4.9e-20	0.25857	0.52	UP
Hnrnpa1	Hnrnpa1	2.3e-21	355	255.5	0.88	0.676	5.5e-20	0.20768	0.47	UP
Izumo1r	Izumo1r	2.3e-21	78	32.7	0.27	0.114	5.7e-20	0.15556	1.25	UP
Eif4e	Eif4e	2.5e-21	82	52.5	0.49	0.267	6e-20	0.22749	0.64	UP
Ube2a	Ube2a	2.5e-21	81	53.9	0.5	0.274	6.1e-20	0.22982	0.59	UP
Rmi2	Rmi2	2.6e-21	34	16.6	0.26	0.105	6.3e-20	0.1539	1.05	UP
Pih1d1	Pih1d1	2.7e-21	49	29.3	0.36	0.173	6.5e-20	0.19062	0.76	UP
Lsm8	Lsm8	2.8e-21	97	65.6	0.55	0.307	6.8e-20	0.23844	0.56	UP
Rplp2	Rplp2	2.9e-21	3575	4304.4	1	0.999	7e-20	-0.00235	-0.27	DOWN
Yif1b	Yif1b	3.1e-21	43	27.1	0.35	0.162	7.3e-20	0.18779	0.65	UP
Txnl4a	Txnl4a	3.3e-21	74	44.8	0.46	0.245	7.9e-20	0.21791	0.72	UP
Psmd1	Psmd1	3.4e-21	79	52.7	0.48	0.256	8e-20	0.22702	0.59	UP
Haspin	Haspin	4.4e-21	34	17.3	0.26	0.106	1e-19	0.15428	0.97	UP
Srm	Srm	5e-21	92	45.8	0.37	0.192	1.2e-19	0.1823	1.01	UP
Rpa2	Rpa2	5.6e-21	92	62.2	0.5	0.277	1.3e-19	0.22667	0.57	UP
Serinc3	Serinc3	5.6e-21	292	181.3	0.75	0.527	1.3e-19	0.21826	0.69	UP
Rplp1	Rplp1	7.1e-21	6304	7747.5	1	1	1.7e-19		-0.3	DOWN
Cdc25b	Cdc25b	8.1e-21	102	55.5	0.42	0.221	1.9e-19	0.19891	0.88	UP
Zfp367	Zfp367	8.8e-21	29	11.2	0.2	0.07	2.1e-19	0.12958	1.35	UP
Gps1	Gps1	1.1e-20	65	40.9	0.42	0.217	2.7e-19	0.20508	0.66	UP
Hist1h2be	Hist1h2be	1.2e-20	37	15.5	0.22	0.081	2.7e-19	0.13582	1.24	UP
Ube2m	Ube2m	1.2e-20	147	103	0.67	0.41	2.9e-19	0.25578	0.52	UP
Gar1	Gar1	1.3e-20	87	54.7	0.48	0.26	3e-19	0.21811	0.67	UP
Rer1	Rer1	1.3e-20	159	113.7	0.73	0.455	3e-19	0.27207	0.48	UP
Bola3	Bola3	1.3e-20	100	67.7	0.57	0.324	3.1e-19	0.24177	0.56	UP
Vdac3	Vdac3	1.3e-20	121	86.2	0.64	0.379	3.1e-19	0.2571	0.48	UP
Atp2a2	Atp2a2	1.4e-20	68	43.6	0.44	0.23	3.3e-19	0.20869	0.65	UP
Psmd6	Psmd6	1.4e-20	106	73	0.59	0.345	3.3e-19	0.24037	0.54	UP
Rps23	Rps23	1.6e-20	3488	4151.2	1	0.999	3.6e-19	0.00053	-0.25	DOWN
Uba2	Uba2	1.6e-20	87	60.8	0.54	0.304	3.7e-19	0.23872	0.53	UP
Cops6	Cops6	1.6e-20	125	85.3	0.65	0.387	3.8e-19	0.25876	0.55	UP
Ints11	Ints11	1.7e-20	47	30.3	0.37	0.176	3.8e-19	0.18943	0.64	UP
Ptbp1	Ptbp1	1.7e-20	129	90.5	0.66	0.397	4e-19	0.25885	0.52	UP
Ctsb	Ctsb	1.8e-20	148	100.7	0.63	0.385	4e-19	0.247	0.56	UP
Ltb	Ltb	1.8e-20	399	602.2	0.74	0.812	4e-19	-0.07519	-0.59	DOWN
Tfrc	Tfrc	1.8e-20	100	44.7	0.32	0.153	4.2e-19	0.16939	1.16	UP
Srsf4	Srsf4	1.8e-20	66	43.6	0.45	0.232	4.2e-19	0.21378	0.6	UP
Gnb1	Gnb1	1.9e-20	175	125.4	0.76	0.489	4.4e-19	0.26617	0.48	UP
Ppp1r14b	Ppp1r14b	1.9e-20	218	139.7	0.71	0.468	4.4e-19	0.24114	0.64	UP
Paics	Paics	2.1e-20	99	68.4	0.56	0.322	4.8e-19	0.24191	0.53	UP
Mrps36	Mrps36	2.3e-20	106	74.1	0.6	0.344	5.1e-19	0.25149	0.51	UP
Gimap3	Gimap3	2.5e-20	283	440.8	0.82	0.82	5.6e-19	0.00326	-0.64	DOWN
Vars	Vars	2.5e-20	125	86.2	0.62	0.368	5.6e-19	0.25086	0.54	UP
Rpl5	Rpl5	2.5e-20	1907	2392.8	0.99	0.993	5.7e-19	-0.00036	-0.33	DOWN
Ndufa5	Ndufa5	2.6e-20	143	101	0.68	0.419	5.8e-19	0.25692	0.51	UP
Sub1	Sub1	2.7e-20	810	625.1	0.97	0.849	6.2e-19	0.11772	0.37	UP
Slc25a39	Slc25a39	2.8e-20	59	37.2	0.39	0.194	6.4e-19	0.1955	0.66	UP
Rpl18	Rpl18	2.8e-20	3233	3875.3	1	0.998	6.4e-19	0.0021	-0.26	DOWN
Cbx1	Cbx1	3.1e-20	174	120.7	0.71	0.453	6.9e-19	0.2573	0.53	UP
Tagln2	Tagln2	3.2e-20	532	374.7	0.9	0.734	7.1e-19	0.16518	0.5	UP
Ruvbl1	Ruvbl1	3.3e-20	68	40.9	0.41	0.217	7.3e-19	0.19645	0.74	UP
Carhsp1	Carhsp1	3.6e-20	43	25	0.3	0.133	8.1e-19	0.16345	0.79	UP
Psma6	Psma6	3.7e-20	157	111.1	0.7	0.448	8.2e-19	0.25301	0.5	UP
Eif3b	Eif3b	3.9e-20	129	86.9	0.6	0.36	8.7e-19	0.23664	0.57	UP
Pnp	Pnp	4.1e-20	75	48.6	0.47	0.252	9.1e-19	0.21592	0.62	UP
Gnb2	Gnb2	4.3e-20	331	232.9	0.83	0.646	9.5e-19	0.17955	0.51	UP
Rps29	Rps29	4.7e-20	6725	8736.3	1	1	1e-18		-0.38	DOWN
Tesc	Tesc	4.7e-20	61	29.6	0.31	0.143	1e-18	0.16498	1.04	UP
Metrn	Metrn	4.7e-20	41	24.3	0.32	0.146	1e-18	0.1719	0.77	UP
Ssr2	Ssr2	4.8e-20	119	84.4	0.6	0.36	1e-18	0.24239	0.49	UP
Eloc	Eloc	4.9e-20	148	106.7	0.69	0.43	1.1e-18	0.25596	0.47	UP
Pkmyt1	Pkmyt1	5.1e-20	25	11.9	0.22	0.081	1.1e-18	0.13438	1.1	UP
Nde1	Nde1	5.1e-20	53	31.5	0.35	0.17	1.1e-18	0.18226	0.76	UP
Mdh2	Mdh2	5.3e-20	245	175.7	0.82	0.58	1.2e-18	0.24053	0.48	UP
Ddost	Ddost	5.3e-20	112	79.2	0.62	0.365	1.2e-18	0.25349	0.5	UP
Fkbp5	Fkbp5	5.9e-20	66	42.2	0.4	0.203	1.3e-18	0.19428	0.65	UP
Ostc	Ostc	6.4e-20	153	110.1	0.71	0.447	1.4e-18	0.25929	0.47	UP
Zdhhc2	Zdhhc2	6.5e-20	33	15.3	0.21	0.08	1.4e-18	0.13308	1.11	UP
Arpp19	Arpp19	6.7e-20	272	199.8	0.85	0.618	1.5e-18	0.23383	0.45	UP
Akt1	Akt1	6.7e-20	81	58.8	0.52	0.284	1.5e-18	0.23658	0.46	UP
Rad23a	Rad23a	6.9e-20	100	67.9	0.55	0.31	1.5e-18	0.23869	0.55	UP
Reep4	Reep4	7.6e-20	48	25.9	0.31	0.144	1.6e-18	0.16681	0.9	UP
Uchl3	Uchl3	8e-20	88	59.5	0.54	0.304	1.7e-18	0.231	0.57	UP
Pold3	Pold3	8.1e-20	54	33.4	0.37	0.184	1.7e-18	0.18966	0.7	UP
Mdh1	Mdh1	8.1e-20	228	162.1	0.78	0.55	1.7e-18	0.23399	0.49	UP
Prdx2	Prdx2	8.5e-20	302	178.7	0.73	0.5	1.8e-18	0.23264	0.76	UP
Prpf31	Prpf31	8.7e-20	57	36.6	0.41	0.208	1.9e-18	0.20198	0.63	UP
Cd8a	Cd8a	8.9e-20	212	353.3	0.41	0.609	1.9e-18	-0.20184	-0.74	DOWN
Cdc25a	Cdc25a	9.1e-20	32	17.8	0.26	0.106	1.9e-18	0.14997	0.84	UP
Ehd4	Ehd4	9.6e-20	41	23.9	0.3	0.138	2e-18	0.16539	0.79	UP
Nup205	Nup205	9.7e-20	31	16.5	0.26	0.109	2.1e-18	0.14969	0.92	UP
Rars	Rars	1e-19	85	55.4	0.5	0.275	2.1e-18	0.22105	0.63	UP
Ccne1	Ccne1	1.2e-19	36	16	0.23	0.093	2.4e-18	0.13864	1.17	UP
Cse1l	Cse1l	1.2e-19	52	33.6	0.37	0.181	2.5e-18	0.18902	0.64	UP
A430005L14Rik	A430005L14Rik	1.2e-19	49	31	0.36	0.177	2.5e-18	0.18406	0.67	UP
Mrpl35	Mrpl35	1.3e-19	59	38.7	0.41	0.212	2.7e-18	0.20209	0.61	UP
Golt1b	Golt1b	1.3e-19	31	16.2	0.25	0.104	2.8e-18	0.14684	0.92	UP
Ptpa	Ptpa	1.4e-19	76	49.9	0.46	0.25	2.9e-18	0.20939	0.61	UP
Mrpl14	Mrpl14	1.4e-19	80	53.1	0.48	0.265	3e-18	0.21861	0.59	UP
Saraf	Saraf	1.4e-19	159	272.7	0.67	0.71	3e-18	-0.04139	-0.78	DOWN
Sf3a3	Sf3a3	1.5e-19	82	55.6	0.51	0.284	3.1e-18	0.22415	0.56	UP
Sf3b6	Sf3b6	1.5e-19	232	171.4	0.82	0.58	3.2e-18	0.24288	0.44	UP
Sumo3	Sumo3	1.5e-19	68	46.5	0.45	0.242	3.2e-18	0.21007	0.56	UP
Rsl1d1	Rsl1d1	1.6e-19	146	96.9	0.63	0.387	3.3e-18	0.24437	0.59	UP
Agfg2	Agfg2	1.8e-19	42	24.8	0.3	0.136	3.7e-18	0.16462	0.77	UP
Actn4	Actn4	1.8e-19	133	93.6	0.65	0.399	3.7e-18	0.24955	0.51	UP
Rpn1	Rpn1	1.9e-19	101	69.6	0.55	0.318	3.9e-18	0.2346	0.54	UP
Atp5k	Atp5k	1.9e-19	393	279.8	0.86	0.681	3.9e-18	0.17652	0.49	UP
Pik3ip1	Pik3ip1	1.9e-19	21	86.3	0.15	0.297	3.9e-18	-0.1521	-2.05	DOWN
Cyb5b	Cyb5b	2e-19	72	48.4	0.47	0.257	4e-18	0.21786	0.58	UP
Tcerg1	Tcerg1	2e-19	101	69.1	0.52	0.297	4.1e-18	0.22684	0.55	UP
Sms	Sms	2e-19	160	112.1	0.69	0.431	4.1e-18	0.25975	0.51	UP
Srsf9	Srsf9	2e-19	83	55.3	0.5	0.281	4.2e-18	0.22011	0.58	UP
Sssca1	Sssca1	2.1e-19	61	37.5	0.4	0.203	4.4e-18	0.19232	0.69	UP
Aimp2	Aimp2	2.2e-19	46	28	0.34	0.16	4.5e-18	0.1755	0.72	UP
Nop56	Nop56	2.2e-19	220	148.8	0.74	0.483	4.5e-18	0.2518	0.56	UP
Rfwd3	Rfwd3	2.3e-19	44	26.7	0.31	0.141	4.7e-18	0.16512	0.73	UP
Meaf6	Meaf6	2.5e-19	46	26.3	0.33	0.153	5.1e-18	0.17174	0.79	UP
Ebp	Ebp	2.6e-19	91	63.4	0.54	0.305	5.2e-18	0.22994	0.53	UP
Grpel1	Grpel1	2.6e-19	102	70.2	0.57	0.334	5.2e-18	0.23558	0.54	UP
Ppp1cc	Ppp1cc	2.7e-19	215	154.4	0.78	0.547	5.4e-18	0.23335	0.48	UP
Mrpl21	Mrpl21	2.9e-19	97	69	0.57	0.329	5.8e-18	0.24318	0.49	UP
Mrto4	Mrto4	2.9e-19	79	46	0.41	0.221	5.9e-18	0.19172	0.78	UP
Cops3	Cops3	3.3e-19	64	43.2	0.43	0.229	6.7e-18	0.20595	0.58	UP
Cox7b	Cox7b	3.4e-19	375	285.5	0.91	0.72	6.9e-18	0.18656	0.39	UP
Rex1bd	Rex1bd	3.8e-19	104	72.2	0.57	0.337	7.7e-18	0.23583	0.52	UP
Canx	Canx	3.9e-19	191	130.8	0.72	0.484	7.8e-18	0.23924	0.54	UP
Nup155	Nup155	4e-19	32	18.5	0.27	0.118	7.9e-18	0.15279	0.77	UP
Ap1s1	Ap1s1	4e-19	49	30.6	0.37	0.18	8e-18	0.18523	0.68	UP
Nfyb	Nfyb	4.1e-19	86	61.2	0.51	0.283	8.2e-18	0.22324	0.49	UP
Sephs1	Sephs1	4.2e-19	30	18.1	0.26	0.111	8.3e-18	0.14955	0.75	UP
Gspt1	Gspt1	4.2e-19	159	109.2	0.68	0.438	8.4e-18	0.24376	0.55	UP
Tbcb	Tbcb	4.5e-19	88	61.3	0.54	0.307	8.9e-18	0.23216	0.53	UP
Pfdn6	Pfdn6	4.8e-19	122	85	0.62	0.38	9.5e-18	0.24453	0.52	UP
Psmd11	Psmd11	5e-19	123	90.4	0.65	0.391	1e-17	0.2594	0.44	UP
Fam162a	Fam162a	5.1e-19	81	53.6	0.48	0.264	1e-17	0.21482	0.59	UP
Dnajc19	Dnajc19	5.3e-19	92	65	0.55	0.321	1e-17	0.23145	0.5	UP
Naa10	Naa10	5.9e-19	106	74.3	0.57	0.341	1.2e-17	0.23359	0.51	UP
Emd	Emd	6.3e-19	84	56.6	0.5	0.281	1.2e-17	0.22155	0.56	UP
Actl6a	Actl6a	6.4e-19	83	60.1	0.54	0.301	1.3e-17	0.23611	0.47	UP
Ppat	Ppat	7.2e-19	51	30.7	0.35	0.17	1.4e-17	0.17559	0.72	UP
Uqcrb	Uqcrb	7.8e-19	246	179.9	0.82	0.595	1.5e-17	0.22961	0.45	UP
Dnajb11	Dnajb11	8.1e-19	98	68.2	0.56	0.323	1.6e-17	0.23222	0.52	UP
Trappc1	Trappc1	8.4e-19	67	43.3	0.42	0.219	1.6e-17	0.19814	0.62	UP
Gfer	Gfer	9.2e-19	39	23.3	0.3	0.139	1.8e-17	0.16343	0.73	UP
Hmgn1	Hmgn1	9.2e-19	205	144.7	0.72	0.484	1.8e-17	0.23689	0.5	UP
Psmc3	Psmc3	9.7e-19	175	129.5	0.73	0.478	1.9e-17	0.25274	0.44	UP
Rpl7l1	Rpl7l1	9.7e-19	75	51.6	0.47	0.259	1.9e-17	0.21484	0.54	UP
Exosc3	Exosc3	9.8e-19	84	57.1	0.52	0.296	1.9e-17	0.22358	0.55	UP
Dcps	Dcps	1e-18	67	45.2	0.47	0.256	1.9e-17	0.21315	0.57	UP
Smarca5	Smarca5	1e-18	242	175.9	0.79	0.549	2e-17	0.23648	0.46	UP
Prim2	Prim2	1e-18	26	12.8	0.23	0.096	2e-17	0.13602	1.04	UP
C1qbp	C1qbp	1.1e-18	169	106.4	0.62	0.398	2.1e-17	0.21751	0.67	UP
Cbfb	Cbfb	1.1e-18	86	60.5	0.51	0.289	2.1e-17	0.22321	0.5	UP
Gm45716	Gm45716	1.1e-18	34	18.9	0.25	0.108	2.1e-17	0.14407	0.87	UP
Capg	Capg	1.4e-18	115	57.6	0.35	0.177	2.6e-17	0.16823	0.99	UP
Slc7a1	Slc7a1	1.4e-18	54	32.4	0.34	0.17	2.6e-17	0.17415	0.74	UP
Mrfap1	Mrfap1	1.4e-18	148	106.7	0.68	0.432	2.6e-17	0.24431	0.47	UP
Psmd2	Psmd2	1.4e-18	120	86.5	0.61	0.372	2.7e-17	0.23947	0.48	UP
Cep57	Cep57	1.5e-18	66	41.9	0.41	0.219	2.8e-17	0.19579	0.66	UP
Pold2	Pold2	1.5e-18	45	27	0.32	0.154	2.9e-17	0.16925	0.72	UP
Arhgap15	Arhgap15	1.6e-18	131	242.1	0.61	0.656	3e-17	-0.04286	-0.89	DOWN
Ms4a4b	Ms4a4b	1.8e-18	1085	1451.1	0.94	0.965	3.4e-17	-0.02719	-0.42	DOWN
Tma7	Tma7	1.8e-18	509	398.3	0.95	0.826	3.4e-17	0.12842	0.35	UP
Psme2	Psme2	1.9e-18	455	338.8	0.93	0.756	3.6e-17	0.16953	0.42	UP
Mrps12	Mrps12	2e-18	82	59.8	0.53	0.299	3.8e-17	0.23193	0.45	UP
Rbm8a	Rbm8a	2.2e-18	163	118.4	0.73	0.468	4.2e-17	0.25697	0.46	UP
Arsb	Arsb	2.4e-18	67	36.2	0.34	0.174	4.6e-17	0.16707	0.89	UP
Mrpl27	Mrpl27	2.5e-18	48	29.4	0.36	0.18	4.7e-17	0.17712	0.7	UP
Cenpc1	Cenpc1	2.5e-18	47	29.4	0.32	0.154	4.7e-17	0.1669	0.68	UP
H3f3b	H3f3b	2.5e-18	1134	894.8	0.99	0.932	4.7e-17	0.0534	0.34	UP
Lman2	Lman2	2.6e-18	135	97.2	0.66	0.412	4.8e-17	0.24845	0.48	UP
Klhdc4	Klhdc4	2.7e-18	39	25.7	0.3	0.141	4.9e-17	0.16224	0.61	UP
Psme3	Psme3	2.7e-18	81	53.7	0.46	0.259	5e-17	0.20333	0.59	UP
Ndufb2	Ndufb2	3.2e-18	131	93.7	0.64	0.404	5.9e-17	0.24051	0.48	UP
Ppp1ca	Ppp1ca	3.3e-18	549	427.1	0.93	0.823	6.1e-17	0.10802	0.36	UP
Fam92a	Fam92a	3.3e-18	34	20.7	0.27	0.122	6.1e-17	0.15238	0.71	UP
Sptssa	Sptssa	3.3e-18	119	79.1	0.6	0.364	6.1e-17	0.23296	0.59	UP
Sf3b4	Sf3b4	3.4e-18	63	42.4	0.45	0.244	6.2e-17	0.20222	0.58	UP
Smc3	Smc3	3.5e-18	179	127.7	0.71	0.469	6.4e-17	0.2363	0.48	UP
Timm8b	Timm8b	3.6e-18	81	56.2	0.49	0.274	6.7e-17	0.21347	0.53	UP
Nudcd2	Nudcd2	3.6e-18	61	39.4	0.39	0.202	6.7e-17	0.18814	0.63	UP
Nup85	Nup85	3.8e-18	34	19.5	0.26	0.112	7e-17	0.1451	0.8	UP
Bag1	Bag1	3.9e-18	179	133.7	0.75	0.498	7.1e-17	0.25436	0.42	UP
Aars	Aars	3.9e-18	39	23.2	0.29	0.132	7.2e-17	0.15587	0.74	UP
Rbl1	Rbl1	4e-18	49	31.8	0.35	0.173	7.4e-17	0.17479	0.63	UP
Idh3a	Idh3a	4.1e-18	66	45.8	0.43	0.229	7.5e-17	0.19731	0.53	UP
Ilf2	Ilf2	4.2e-18	101	75.3	0.58	0.342	7.6e-17	0.23633	0.43	UP
Sec11c	Sec11c	4.3e-18	242	167.2	0.75	0.533	7.9e-17	0.21483	0.53	UP
Atp5e	Atp5e	4.8e-18	932	765.8	0.99	0.927	8.7e-17	0.05957	0.28	UP
Pfdn1	Pfdn1	4.9e-18	100	71.7	0.58	0.344	8.9e-17	0.23187	0.49	UP
Cad	Cad	5.3e-18	38	22.2	0.27	0.122	9.7e-17	0.15003	0.76	UP
Blmh	Blmh	5.6e-18	76	55.7	0.49	0.273	1e-16	0.21596	0.45	UP
Mapk3	Mapk3	5.8e-18	50	33.2	0.35	0.173	1e-16	0.17335	0.59	UP
Ide	Ide	5.9e-18	64	49.1	0.45	0.241	1.1e-16	0.20772	0.39	UP
Sem1	Sem1	6.3e-18	422	329.4	0.92	0.756	1.1e-16	0.16037	0.36	UP
Creld2	Creld2	6.4e-18	36	22.2	0.29	0.135	1.1e-16	0.15612	0.7	UP
Azin1	Azin1	6.9e-18	78	54.2	0.47	0.261	1.2e-16	0.20934	0.53	UP
Ak6	Ak6	7.2e-18	40	25.1	0.31	0.147	1.3e-16	0.1613	0.69	UP
Sephs2	Sephs2	7.3e-18	44	29.2	0.33	0.158	1.3e-16	0.16989	0.58	UP
Phb	Phb	7.6e-18	64	40.3	0.4	0.209	1.4e-16	0.18654	0.67	UP
Eri1	Eri1	8.2e-18	81	57.4	0.49	0.28	1.5e-16	0.21541	0.49	UP
Psmc1	Psmc1	8.4e-18	99	68.1	0.55	0.327	1.5e-16	0.22226	0.54	UP
Ppid	Ppid	8.4e-18	76	52.1	0.47	0.262	1.5e-16	0.20829	0.55	UP
Selplg	Selplg	8.5e-18	326	483.8	0.8	0.828	1.5e-16	-0.03248	-0.57	DOWN
Ola1	Ola1	9e-18	104	74.3	0.57	0.339	1.6e-16	0.23176	0.48	UP
Erg28	Erg28	9.2e-18	68	47.6	0.46	0.251	1.6e-16	0.20834	0.52	UP
Mrpl15	Mrpl15	9.2e-18	101	71.7	0.56	0.331	1.6e-16	0.22578	0.49	UP
Rpa1	Rpa1	9.3e-18	93	65.7	0.53	0.307	1.6e-16	0.22065	0.51	UP
Prpf40a	Prpf40a	9.4e-18	205	150.2	0.75	0.52	1.7e-16	0.23425	0.45	UP
Bub3	Bub3	1e-17	152	101.9	0.62	0.397	1.8e-16	0.22432	0.58	UP
Pole2	Pole2	1.1e-17	25	12.6	0.22	0.088	2e-16	0.12898	0.98	UP
Apex1	Apex1	1.2e-17	57	32.5	0.33	0.167	2.1e-16	0.16383	0.82	UP
Mis18a	Mis18a	1.2e-17	38	25.6	0.32	0.15	2.1e-16	0.16534	0.58	UP
Hdac1	Hdac1	1.2e-17	143	105.1	0.67	0.426	2.2e-16	0.24198	0.45	UP
Gins4	Gins4	1.3e-17	47	29.8	0.35	0.18	2.3e-16	0.17424	0.65	UP
Psmd3	Psmd3	1.4e-17	72	50.7	0.49	0.274	2.5e-16	0.21347	0.5	UP
Rapgef6	Rapgef6	1.5e-17	148	273.7	0.65	0.675	2.6e-16	-0.02633	-0.88	DOWN
Polr2k	Polr2k	1.6e-17	99	73.6	0.57	0.339	2.7e-16	0.2332	0.43	UP
Vdac2	Vdac2	1.6e-17	179	132.2	0.75	0.504	2.8e-16	0.24517	0.43	UP
Txk	Txk	1.6e-17	143	281.4	0.56	0.633	2.8e-16	-0.06918	-0.97	DOWN
Hikeshi	Hikeshi	1.6e-17	60	40.8	0.42	0.225	2.8e-16	0.19183	0.56	UP
Tomm40	Tomm40	1.6e-17	80	54.9	0.47	0.266	2.8e-16	0.2084	0.55	UP
Uqcr11	Uqcr11	1.6e-17	216	159.9	0.79	0.557	2.8e-16	0.23004	0.43	UP
Timm17b	Timm17b	1.8e-17	65	44.7	0.44	0.245	3e-16	0.19776	0.54	UP
Nup43	Nup43	1.8e-17	27	13.9	0.22	0.088	3.1e-16	0.12807	0.94	UP
Tpm3	Tpm3	1.8e-17	583	456.9	0.94	0.82	3.1e-16	0.12216	0.35	UP
Tomm6	Tomm6	1.9e-17	25	13.1	0.22	0.092	3.2e-16	0.13054	0.91	UP
Psmd8	Psmd8	1.9e-17	167	123.1	0.72	0.472	3.2e-16	0.24754	0.44	UP
Sass6	Sass6	1.9e-17	25	12.8	0.21	0.083	3.2e-16	0.12417	0.97	UP
Psma3	Psma3	2e-17	275	211.1	0.87	0.638	3.4e-16	0.234	0.38	UP
Mtch2	Mtch2	2.1e-17	78	56.1	0.49	0.277	3.5e-16	0.21516	0.48	UP
Thoc7	Thoc7	2.2e-17	152	111.9	0.69	0.445	3.7e-16	0.24412	0.44	UP
Tmem109	Tmem109	2.2e-17	40	23.2	0.29	0.139	3.7e-16	0.15283	0.78	UP
Leo1	Leo1	2.3e-17	35	22.3	0.28	0.126	3.9e-16	0.15014	0.66	UP
Arhgdia	Arhgdia	2.3e-17	318	244.1	0.88	0.668	3.9e-16	0.20837	0.38	UP
Eif1ad	Eif1ad	2.3e-17	60	40	0.41	0.22	4e-16	0.18754	0.58	UP
Acp1	Acp1	2.5e-17	84	58.5	0.49	0.281	4.2e-16	0.21004	0.53	UP
Tssc4	Tssc4	2.7e-17	31	19.1	0.26	0.117	4.6e-16	0.14469	0.7	UP
Ttf2	Ttf2	2.7e-17	30	17.6	0.24	0.103	4.7e-16	0.13585	0.78	UP
Tgfb1	Tgfb1	2.9e-17	137	101.9	0.63	0.389	4.9e-16	0.24083	0.42	UP
Elavl1	Elavl1	2.9e-17	97	74.2	0.59	0.349	4.9e-16	0.23616	0.39	UP
Tnrc6b	Tnrc6b	3e-17	118	227.4	0.59	0.633	5e-16	-0.0476	-0.95	DOWN
Mrps21	Mrps21	3e-17	142	105.3	0.68	0.436	5.1e-16	0.24011	0.43	UP
Srsf1	Srsf1	3.1e-17	131	99.3	0.66	0.414	5.2e-16	0.25119	0.4	UP
Foxp1	Foxp1	3.3e-17	188	316.4	0.64	0.692	5.5e-16	-0.04981	-0.75	DOWN
Bzw1	Bzw1	3.3e-17	253	184.2	0.79	0.582	5.5e-16	0.21253	0.46	UP
Strap	Strap	3.4e-17	88	61.4	0.51	0.3	5.7e-16	0.21218	0.52	UP
Slirp	Slirp	3.4e-17	59	39.9	0.43	0.233	5.7e-16	0.19546	0.57	UP
Cnih1	Cnih1	3.5e-17	49	33.1	0.36	0.186	5.9e-16	0.17657	0.58	UP
Eif3l	Eif3l	3.7e-17	125	94.8	0.66	0.409	6.2e-16	0.24729	0.4	UP
Magohb	Magohb	3.7e-17	43	26.5	0.3	0.147	6.2e-16	0.15555	0.71	UP
Pom121	Pom121	3.8e-17	52	35	0.37	0.188	6.3e-16	0.17734	0.56	UP
Vma21	Vma21	4.1e-17	47	31.6	0.37	0.192	6.8e-16	0.18033	0.56	UP
Baz1b	Baz1b	4.2e-17	197	144.5	0.73	0.49	7e-16	0.23922	0.45	UP
Macf1	Macf1	4.3e-17	236	406.6	0.76	0.756	7.2e-16	0.00785	-0.79	DOWN
Mrpl40	Mrpl40	4.3e-17	66	47.4	0.44	0.241	7.2e-16	0.19909	0.48	UP
Mrps26	Mrps26	4.4e-17	89	67.8	0.54	0.318	7.4e-16	0.22597	0.4	UP
Taf10	Taf10	4.5e-17	325	247.1	0.88	0.685	7.5e-16	0.19155	0.39	UP
Med9	Med9	4.6e-17	28	15.3	0.24	0.104	7.6e-16	0.1348	0.88	UP
Car2	Car2	4.7e-17	208	106.9	0.39	0.221	7.8e-16	0.16726	0.96	UP
Nefh	Nefh	4.9e-17	34	16.4	0.21	0.085	8.1e-16	0.1235	1.07	UP
Capzb	Capzb	5e-17	424	327.6	0.91	0.74	8.2e-16	0.16894	0.37	UP
S1pr1	S1pr1	5.1e-17	87	181.9	0.4	0.522	8.4e-16	-0.11946	-1.06	DOWN
Sap18	Sap18	5.1e-17	118	83.5	0.61	0.375	8.4e-16	0.23631	0.49	UP
Ywhab	Ywhab	5.3e-17	277	212.6	0.85	0.642	8.7e-16	0.21162	0.38	UP
Myl6	Myl6	5.4e-17	1327	1087.6	1	0.964	8.9e-16	0.03194	0.29	UP
Ak2	Ak2	5.8e-17	108	77.8	0.57	0.346	9.5e-16	0.22401	0.48	UP
Rnh1	Rnh1	6.8e-17	74	53.7	0.47	0.263	1.1e-15	0.20488	0.47	UP
Trim28	Trim28	7e-17	93	68	0.55	0.327	1.1e-15	0.22567	0.44	UP
Pycard	Pycard	7.1e-17	412	288.4	0.79	0.615	1.2e-15	0.17027	0.52	UP
Batf	Batf	7.2e-17	79	48.4	0.38	0.207	1.2e-15	0.17713	0.7	UP
Pdzd11	Pdzd11	7.8e-17	33	18.4	0.25	0.112	1.3e-15	0.13791	0.85	UP
Rnps1	Rnps1	8e-17	105	76.5	0.58	0.349	1.3e-15	0.22897	0.46	UP
Gm26740	Gm26740	8.2e-17	57	138.1	0.36	0.467	1.3e-15	-0.10601	-1.27	DOWN
Cct3	Cct3	8.2e-17	200	135.1	0.71	0.49	1.3e-15	0.21528	0.57	UP
Tmem167	Tmem167	8.3e-17	163	124.6	0.73	0.48	1.3e-15	0.24776	0.39	UP
Ndufs5	Ndufs5	8.6e-17	150	109.7	0.7	0.459	1.4e-15	0.24341	0.45	UP
Fam96a	Fam96a	8.6e-17	107	76.6	0.57	0.346	1.4e-15	0.22781	0.48	UP
Lsm7	Lsm7	8.6e-17	118	84.5	0.59	0.367	1.4e-15	0.22405	0.48	UP
Tmco1	Tmco1	8.7e-17	110	80	0.59	0.362	1.4e-15	0.22839	0.46	UP
Dynll1	Dynll1	8.7e-17	405	299.2	0.88	0.701	1.4e-15	0.18389	0.44	UP
Sf3a1	Sf3a1	8.7e-17	61	42.1	0.42	0.227	1.4e-15	0.19026	0.53	UP
Fam96b	Fam96b	9e-17	71	52.3	0.49	0.274	1.4e-15	0.21203	0.45	UP
Clic4	Clic4	9.1e-17	31	16.6	0.24	0.106	1.5e-15	0.13323	0.91	UP
Casp8ap2	Casp8ap2	9.5e-17	110	81.6	0.54	0.326	1.5e-15	0.21808	0.44	UP
Shisa5	Shisa5	9.5e-17	708	916.3	0.97	0.946	1.5e-15	0.01907	-0.37	DOWN
Ndufaf2	Ndufaf2	9.9e-17	39	24.3	0.29	0.137	1.6e-15	0.1497	0.67	UP
Rtn3	Rtn3	9.9e-17	121	89.1	0.63	0.393	1.6e-15	0.23768	0.44	UP
Cct8	Cct8	1e-16	233	171	0.79	0.566	1.6e-15	0.22202	0.45	UP
Kars	Kars	1.1e-16	63	44.1	0.43	0.231	1.7e-15	0.19521	0.51	UP
Nsmce2	Nsmce2	1.1e-16	52	35.2	0.36	0.188	1.7e-15	0.17303	0.57	UP
Nt5c3b	Nt5c3b	1.1e-16	63	45.3	0.45	0.246	1.8e-15	0.19959	0.47	UP
Nelfcd	Nelfcd	1.2e-16	36	23.1	0.29	0.141	1.8e-15	0.15269	0.65	UP
Get4	Get4	1.2e-16	38	23.5	0.3	0.148	1.8e-15	0.1545	0.69	UP
Bcl2a1d	Bcl2a1d	1.2e-16	51	25.3	0.25	0.115	1.9e-15	0.1358	1.02	UP
Nup107	Nup107	1.3e-16	27	15.7	0.24	0.104	2e-15	0.13336	0.78	UP
Ahsa1	Ahsa1	1.4e-16	90	67.3	0.53	0.312	2.1e-15	0.21788	0.42	UP
D030056L22Rik	D030056L22Rik	1.4e-16	28	14.2	0.23	0.099	2.1e-15	0.12855	0.98	UP
Rnf126	Rnf126	1.4e-16	52	34.3	0.38	0.2	2.2e-15	0.17873	0.6	UP
Gtf2f1	Gtf2f1	1.5e-16	67	48.4	0.44	0.248	2.3e-15	0.19657	0.48	UP
Ogt	Ogt	1.5e-16	165	269.4	0.69	0.709	2.4e-15	-0.0202	-0.7	DOWN
Eif6	Eif6	1.5e-16	142	103.6	0.66	0.426	2.4e-15	0.2357	0.46	UP
Phb2	Phb2	1.6e-16	198	142	0.75	0.517	2.5e-15	0.22825	0.48	UP
Mrpl57	Mrpl57	1.6e-16	144	109.9	0.68	0.44	2.5e-15	0.24362	0.39	UP
Mrpl49	Mrpl49	1.6e-16	37	23	0.28	0.135	2.5e-15	0.14984	0.68	UP
Mb21d1	Mb21d1	1.6e-16	29	15.1	0.2	0.084	2.5e-15	0.12076	0.93	UP
Cdca4	Cdca4	1.6e-16	51	32	0.36	0.19	2.5e-15	0.17093	0.68	UP
Gnai2	Gnai2	1.6e-16	740	577	0.95	0.871	2.5e-15	0.07459	0.36	UP
Mis12	Mis12	1.7e-16	36	21.7	0.26	0.121	2.6e-15	0.14245	0.72	UP
Aurkaip1	Aurkaip1	1.8e-16	166	122.5	0.72	0.482	2.8e-15	0.23468	0.44	UP
Pebp1	Pebp1	1.9e-16	191	140.3	0.75	0.51	3e-15	0.2356	0.45	UP
Ms4a6b	Ms4a6b	1.9e-16	439	618.9	0.84	0.868	3e-15	-0.03017	-0.5	DOWN
Lef1	Lef1	2e-16	123	269.3	0.5	0.58	3.2e-15	-0.08033	-1.13	DOWN
Mrps28	Mrps28	2.1e-16	40	26.5	0.32	0.156	3.2e-15	0.15956	0.6	UP
Tdp1	Tdp1	2.2e-16	25	12.5	0.21	0.088	3.3e-15	0.12232	0.98	UP
Rpn2	Rpn2	2.3e-16	124	91.2	0.61	0.383	3.6e-15	0.22268	0.45	UP
Pole4	Pole4	2.3e-16	128	94.3	0.63	0.397	3.6e-15	0.23583	0.44	UP
Mrps24	Mrps24	2.4e-16	170	129.9	0.75	0.497	3.7e-15	0.24821	0.39	UP
Rnf168	Rnf168	2.4e-16	39	24.8	0.28	0.135	3.7e-15	0.1484	0.65	UP
Nab2	Nab2	2.5e-16	38	21.1	0.24	0.11	3.7e-15	0.13425	0.86	UP
Ddb1	Ddb1	2.6e-16	83	60.3	0.51	0.294	4e-15	0.21076	0.46	UP
Ebna1bp2	Ebna1bp2	2.9e-16	112	76.6	0.57	0.348	4.5e-15	0.21903	0.54	UP
Ndufb11	Ndufb11	2.9e-16	288	216.7	0.85	0.64	4.5e-15	0.21176	0.41	UP
Bsg	Bsg	3e-16	212	145.8	0.73	0.499	4.5e-15	0.2346	0.54	UP
Akip1	Akip1	3.1e-16	27	16.3	0.23	0.099	4.7e-15	0.12946	0.76	UP
Jak1	Jak1	3.1e-16	400	559.8	0.9	0.883	4.7e-15	0.02026	-0.48	DOWN
Gtf2h5	Gtf2h5	3.2e-16	118	89.9	0.62	0.386	4.8e-15	0.23247	0.4	UP
Csnk2b	Csnk2b	3.3e-16	188	145	0.76	0.527	5e-15	0.23461	0.38	UP
Timm17a	Timm17a	3.4e-16	72	53	0.47	0.265	5.2e-15	0.20513	0.45	UP
Mrps6	Mrps6	3.5e-16	48	26.7	0.31	0.16	5.4e-15	0.1534	0.84	UP
Lsm12	Lsm12	3.7e-16	121	88.1	0.61	0.384	5.5e-15	0.22738	0.46	UP
Dtnbp1	Dtnbp1	3.7e-16	40	24.7	0.3	0.147	5.6e-15	0.15411	0.68	UP
Nubp2	Nubp2	3.7e-16	50	36.6	0.38	0.202	5.6e-15	0.18186	0.46	UP
Vim	Vim	3.8e-16	725	468.2	0.78	0.641	5.8e-15	0.13641	0.63	UP
Hnrnpll	Hnrnpll	4.1e-16	39	24.6	0.28	0.131	6.2e-15	0.14633	0.65	UP
Sdhd	Sdhd	4.2e-16	76	52.5	0.47	0.271	6.3e-15	0.19935	0.53	UP
Kpnb1	Kpnb1	4.2e-16	108	79.3	0.58	0.358	6.4e-15	0.222	0.45	UP
Memo1	Memo1	4.4e-16	37	21.7	0.27	0.128	6.5e-15	0.14281	0.76	UP
Atp5c1	Atp5c1	4.4e-16	390	308.8	0.91	0.746	6.6e-15	0.168	0.34	UP
Glrx3	Glrx3	4.5e-16	130	95	0.65	0.418	6.7e-15	0.22972	0.46	UP
Map2k3	Map2k3	4.5e-16	52	35.5	0.35	0.182	6.8e-15	0.16874	0.56	UP
Polr2l	Polr2l	4.8e-16	61	42.9	0.43	0.236	7.2e-15	0.18943	0.52	UP
Akap13	Akap13	5e-16	302	439.2	0.83	0.826	7.4e-15	0.00703	-0.54	DOWN
Tubgcp2	Tubgcp2	5e-16	34	20.9	0.26	0.123	7.5e-15	0.14126	0.72	UP
Oat	Oat	5e-16	39	25.5	0.31	0.151	7.5e-15	0.15513	0.6	UP
Ppp2r1a	Ppp2r1a	5.3e-16	84	63.8	0.53	0.314	7.9e-15	0.21866	0.39	UP
Ssb	Ssb	5.7e-16	292	224.7	0.85	0.647	8.4e-15	0.20349	0.38	UP
Hras	Hras	5.7e-16	71	49.7	0.44	0.252	8.5e-15	0.19093	0.51	UP
Pcmt1	Pcmt1	5.8e-16	95	70.7	0.54	0.317	8.6e-15	0.21786	0.42	UP
Exosc7	Exosc7	5.9e-16	70	52.8	0.46	0.259	8.7e-15	0.19901	0.4	UP
Lrrc59	Lrrc59	6.3e-16	47	32.5	0.36	0.185	9.3e-15	0.17042	0.52	UP
Cdc34	Cdc34	6.4e-16	72	52.4	0.46	0.266	9.5e-15	0.19597	0.47	UP
Wdr18	Wdr18	6.6e-16	49	32.4	0.34	0.174	9.8e-15	0.16275	0.6	UP
Lmf2	Lmf2	6.7e-16	29	16.7	0.23	0.101	9.8e-15	0.1288	0.8	UP
Wdr83os	Wdr83os	6.7e-16	111	84.4	0.6	0.37	9.8e-15	0.23097	0.4	UP
Uqcrc1	Uqcrc1	6.7e-16	147	108.5	0.68	0.447	9.9e-15	0.23823	0.44	UP
Pdcd5	Pdcd5	6.9e-16	171	131.4	0.75	0.502	1e-14	0.24924	0.38	UP
Tomm5	Tomm5	7e-16	146	105.2	0.66	0.425	1e-14	0.231	0.47	UP
Rpp30	Rpp30	7e-16	28	17.5	0.24	0.108	1e-14	0.13348	0.7	UP
Usmg5	Usmg5	7.1e-16	197	145.3	0.74	0.526	1e-14	0.21787	0.44	UP
Idh3g	Idh3g	7.2e-16	95	71.5	0.56	0.342	1.1e-14	0.22102	0.41	UP
Timm13	Timm13	7.4e-16	201	149.3	0.77	0.533	1.1e-14	0.23354	0.43	UP
Aifm1	Aifm1	7.4e-16	36	24.9	0.31	0.154	1.1e-14	0.15774	0.54	UP
Uck2	Uck2	7.5e-16	52	33.7	0.34	0.179	1.1e-14	0.16469	0.62	UP
Cetn3	Cetn3	7.6e-16	105	78.5	0.58	0.36	1.1e-14	0.2199	0.42	UP
Mrpl34	Mrpl34	7.7e-16	96	74.3	0.57	0.347	1.1e-14	0.22584	0.38	UP
Fkbp4	Fkbp4	7.7e-16	114	83	0.58	0.355	1.1e-14	0.22031	0.45	UP
Adprh	Adprh	7.7e-16	67	50.6	0.47	0.264	1.1e-14	0.20187	0.4	UP
Hspa4	Hspa4	8.6e-16	154	111	0.67	0.437	1.2e-14	0.23186	0.47	UP
Vbp1	Vbp1	8.8e-16	74	55.5	0.49	0.282	1.3e-14	0.20702	0.42	UP
Mbd3	Mbd3	9.8e-16	111	83.6	0.59	0.363	1.4e-14	0.2259	0.41	UP
Fam111a	Fam111a	9.8e-16	127	91.2	0.58	0.359	1.4e-14	0.21611	0.48	UP
Vps36	Vps36	9.9e-16	101	78.8	0.57	0.344	1.4e-14	0.22991	0.36	UP
Spcs1	Spcs1	1e-15	144	110.6	0.7	0.456	1.5e-14	0.24028	0.38	UP
Hdgfl2	Hdgfl2	1.1e-15	48	36.3	0.37	0.193	1.6e-14	0.17261	0.41	UP
Cs	Cs	1.1e-15	89	63.8	0.53	0.324	1.6e-14	0.20867	0.48	UP
Rad18	Rad18	1.1e-15	32	21.7	0.26	0.122	1.6e-14	0.13943	0.57	UP
Calm2	Calm2	1.1e-15	418	290.5	0.86	0.681	1.6e-14	0.17993	0.52	UP
Saal1	Saal1	1.1e-15	26	15.2	0.23	0.099	1.6e-14	0.12658	0.77	UP
Cmah	Cmah	1.1e-15	65	164	0.37	0.469	1.6e-14	-0.09804	-1.34	DOWN
Tmed2	Tmed2	1.2e-15	186	142.2	0.76	0.524	1.8e-14	0.23292	0.39	UP
Usp14	Usp14	1.2e-15	59	40.9	0.39	0.217	1.8e-14	0.17631	0.54	UP
Cnpy2	Cnpy2	1.3e-15	53	37.7	0.38	0.202	1.8e-14	0.17467	0.49	UP
Paxip1	Paxip1	1.3e-15	31	18.7	0.26	0.124	1.8e-14	0.13786	0.73	UP
Cct2	Cct2	1.3e-15	286	218.1	0.85	0.641	1.8e-14	0.21358	0.39	UP
Ssr1	Ssr1	1.3e-15	91	64.2	0.51	0.303	1.8e-14	0.20667	0.5	UP
Hif1a	Hif1a	1.4e-15	110	72.7	0.49	0.293	2e-14	0.19507	0.59	UP
Rfc1	Rfc1	1.4e-15	107	74.2	0.53	0.323	2e-14	0.20488	0.52	UP
Ppp2r2d	Ppp2r2d	1.5e-15	53	37	0.38	0.202	2.1e-14	0.17375	0.52	UP
Carnmt1	Carnmt1	1.5e-15	44	29.7	0.33	0.169	2.2e-14	0.16173	0.55	UP
Comt	Comt	1.5e-15	42	27.6	0.32	0.161	2.2e-14	0.15575	0.6	UP
Bckdk	Bckdk	1.6e-15	38	24.2	0.3	0.149	2.2e-14	0.15004	0.63	UP
Ncbp2	Ncbp2	1.6e-15	60	40.8	0.39	0.215	2.2e-14	0.175	0.55	UP
Mrps11	Mrps11	1.7e-15	40	25.6	0.3	0.151	2.5e-14	0.15082	0.65	UP
Nolc1	Nolc1	1.8e-15	133	86.5	0.53	0.335	2.5e-14	0.19332	0.62	UP
Nifk	Nifk	1.8e-15	84	53.9	0.44	0.261	2.5e-14	0.18396	0.63	UP
Med8	Med8	1.9e-15	64	48.9	0.45	0.251	2.7e-14	0.19683	0.38	UP
Rps27rt	Rps27rt	1.9e-15	210	334.3	0.72	0.722	2.7e-14	-0.00691	-0.67	DOWN
Snf8	Snf8	2e-15	103	79.7	0.59	0.358	2.7e-14	0.23063	0.37	UP
Cct7	Cct7	2e-15	236	178.2	0.81	0.584	2.8e-14	0.22861	0.41	UP
Mlec	Mlec	2e-15	108	80.4	0.57	0.35	2.9e-14	0.22269	0.42	UP
Syngr2	Syngr2	2.1e-15	59	42.3	0.41	0.225	3e-14	0.1832	0.49	UP
Edf1	Edf1	2.3e-15	321	253.2	0.9	0.693	3.2e-14	0.2076	0.34	UP
Dock2	Dock2	2.3e-15	221	335.2	0.77	0.767	3.3e-14	-0.00174	-0.6	DOWN
1110008F13Rik	1110008F13Rik	2.5e-15	122	92.9	0.64	0.409	3.5e-14	0.23525	0.39	UP
Ube2i	Ube2i	2.6e-15	279	220.8	0.88	0.663	3.6e-14	0.21506	0.34	UP
Emb	Emb	2.6e-15	164	312.8	0.58	0.648	3.7e-14	-0.06428	-0.93	DOWN
Etfa	Etfa	2.7e-15	63	46.6	0.44	0.248	3.7e-14	0.18938	0.43	UP
Abracl	Abracl	2.7e-15	407	327.5	0.9	0.745	3.8e-14	0.15898	0.31	UP
Ripk3	Ripk3	2.7e-15	32	20.2	0.27	0.125	3.8e-14	0.14112	0.66	UP
Mphosph6	Mphosph6	2.8e-15	33	21.6	0.27	0.13	3.8e-14	0.14071	0.63	UP
Ciapin1	Ciapin1	2.8e-15	46	31.7	0.33	0.173	3.9e-14	0.16093	0.53	UP
Dera	Dera	2.8e-15	51	36.9	0.36	0.192	3.9e-14	0.16791	0.48	UP
Cmtm7	Cmtm7	2.8e-15	163	109	0.58	0.39	3.9e-14	0.19282	0.58	UP
Acadl	Acadl	2.9e-15	95	70	0.52	0.312	3.9e-14	0.20781	0.45	UP
Eif3c	Eif3c	2.9e-15	314	241.4	0.86	0.668	4e-14	0.19633	0.38	UP
Tars	Tars	3e-15	64	44.2	0.41	0.23	4.1e-14	0.17991	0.53	UP
Krtcap2	Krtcap2	3.1e-15	293	225	0.87	0.658	4.2e-14	0.20775	0.38	UP
Ghitm	Ghitm	3.2e-15	140	110.3	0.69	0.439	4.4e-14	0.24846	0.34	UP
Tuba1a	Tuba1a	3.3e-15	123	80.5	0.53	0.335	4.5e-14	0.19136	0.61	UP
Rsrp1	Rsrp1	3.6e-15	245	364.8	0.83	0.81	5e-14	0.01613	-0.58	DOWN
Tpm4	Tpm4	3.7e-15	215	151.8	0.69	0.488	5e-14	0.20103	0.5	UP
Arhgap45	Arhgap45	3.8e-15	212	322.7	0.77	0.773	5.1e-14	0.00111	-0.6	DOWN
Unc119	Unc119	3.8e-15	46	29.9	0.31	0.161	5.1e-14	0.14999	0.62	UP
St13	St13	3.9e-15	191	135.6	0.69	0.468	5.3e-14	0.22153	0.49	UP
Atp5g2	Atp5g2	4.2e-15	596	484.8	0.95	0.853	5.7e-14	0.10109	0.3	UP
Gltp	Gltp	4.3e-15	125	92.3	0.62	0.398	5.8e-14	0.22379	0.43	UP
Sp100	Sp100	4.3e-15	268	400.9	0.78	0.788	5.8e-14	-0.00641	-0.58	DOWN
Isyna1	Isyna1	4.4e-15	56	40.9	0.39	0.217	6e-14	0.17774	0.44	UP
Etaa1	Etaa1	4.6e-15	38	25.8	0.28	0.135	6.2e-14	0.14317	0.56	UP
Bzw2	Bzw2	4.6e-15	119	82.8	0.55	0.341	6.3e-14	0.20716	0.52	UP
Mpdu1	Mpdu1	4.7e-15	43	29.1	0.34	0.176	6.4e-14	0.15974	0.55	UP
Bak1	Bak1	4.8e-15	66	47.4	0.41	0.233	6.5e-14	0.18107	0.47	UP
Thoc6	Thoc6	4.8e-15	32	20.3	0.26	0.125	6.5e-14	0.13589	0.63	UP
Got2	Got2	5.1e-15	71	50.4	0.44	0.254	6.9e-14	0.18504	0.49	UP
Srrt	Srrt	5.2e-15	123	92.4	0.62	0.395	7e-14	0.2255	0.41	UP
Hars	Hars	5.3e-15	51	37	0.38	0.205	7.1e-14	0.17348	0.46	UP
Mat2a	Mat2a	5.4e-15	173	127.1	0.68	0.45	7.3e-14	0.22592	0.45	UP
Slc35b1	Slc35b1	5.5e-15	34	22.2	0.28	0.135	7.4e-14	0.14121	0.6	UP
Vapa	Vapa	5.6e-15	99	75.1	0.58	0.35	7.5e-14	0.22504	0.39	UP
Dph3	Dph3	5.6e-15	89	69.3	0.53	0.319	7.5e-14	0.21144	0.36	UP
Coro1c	Coro1c	5.8e-15	54	38.1	0.37	0.203	7.7e-14	0.17074	0.49	UP
Zfp706	Zfp706	5.8e-15	149	115.2	0.69	0.463	7.7e-14	0.23149	0.37	UP
Dok2	Dok2	5.9e-15	98	68.3	0.48	0.286	7.9e-14	0.18987	0.52	UP
Pabpc4	Pabpc4	6.4e-15	56	34.3	0.34	0.181	8.5e-14	0.1554	0.71	UP
Cnot6	Cnot6	6.4e-15	83	66	0.51	0.299	8.5e-14	0.20747	0.33	UP
Nup93	Nup93	6.6e-15	30	17.9	0.24	0.114	8.7e-14	0.13057	0.73	UP
Mapkapk2	Mapkapk2	6.7e-15	54	38.8	0.38	0.208	8.9e-14	0.17032	0.49	UP
Pfdn4	Pfdn4	7e-15	42	29.4	0.33	0.17	9.3e-14	0.15833	0.52	UP
Nono	Nono	7.1e-15	204	156.5	0.77	0.549	9.4e-14	0.22353	0.38	UP
Nucb1	Nucb1	7.2e-15	90	65.7	0.5	0.302	9.5e-14	0.20197	0.45	UP
Myg1	Myg1	7.2e-15	48	33.1	0.36	0.192	9.6e-14	0.16451	0.54	UP
Sar1a	Sar1a	7.3e-15	81	62.1	0.5	0.292	9.6e-14	0.2062	0.38	UP
Srsf10	Srsf10	7.3e-15	145	111.9	0.68	0.446	9.6e-14	0.23352	0.38	UP
Myef2	Myef2	7.7e-15	34	21.5	0.26	0.125	1e-13	0.13537	0.65	UP
Snrpg	Snrpg	7.9e-15	536	434.2	0.94	0.831	1e-13	0.10734	0.3	UP
Fdps	Fdps	8.3e-15	38	22.3	0.26	0.122	1.1e-13	0.1342	0.76	UP
Map4k1	Map4k1	8.4e-15	55	40.2	0.38	0.207	1.1e-13	0.1719	0.45	UP
Utrn	Utrn	8.5e-15	133	243.9	0.62	0.643	1.1e-13	-0.02305	-0.88	DOWN
Mad2l2	Mad2l2	8.8e-15	26	15.1	0.22	0.101	1.1e-13	0.12357	0.76	UP
Khsrp	Khsrp	8.9e-15	68	51.1	0.46	0.266	1.2e-13	0.19454	0.41	UP
Cinp	Cinp	9.1e-15	32	19.1	0.25	0.116	1.2e-13	0.13044	0.74	UP
Hspa9	Hspa9	9.2e-15	112	77	0.53	0.331	1.2e-13	0.19753	0.54	UP
Ppp1r35	Ppp1r35	9.7e-15	55	39.8	0.4	0.221	1.3e-13	0.17589	0.46	UP
Arf5	Arf5	9.9e-15	367	281.8	0.91	0.725	1.3e-13	0.18039	0.38	UP
Samhd1	Samhd1	1e-14	147	262.7	0.56	0.624	1.4e-13	-0.06836	-0.83	DOWN
Rdx	Rdx	1e-14	177	136.9	0.72	0.489	1.4e-13	0.2336	0.37	UP
Parp1	Parp1	1.1e-14	77	57.2	0.47	0.276	1.4e-13	0.1941	0.42	UP
Aaas	Aaas	1.1e-14	27	17.7	0.23	0.108	1.4e-13	0.12681	0.63	UP
Api5	Api5	1.1e-14	72	54.1	0.47	0.273	1.4e-13	0.19437	0.42	UP
Hist1h4h	Hist1h4h	1.1e-14	43	20.7	0.22	0.102	1.5e-13	0.11964	1.06	UP
Adsl	Adsl	1.2e-14	47	33.3	0.35	0.189	1.5e-13	0.16243	0.49	UP
Polr2j	Polr2j	1.2e-14	136	106.8	0.7	0.452	1.5e-13	0.2454	0.35	UP
Ddx39b	Ddx39b	1.2e-14	235	179	0.8	0.587	1.5e-13	0.21682	0.4	UP
C1d	C1d	1.2e-14	59	44.9	0.43	0.241	1.6e-13	0.18523	0.39	UP
Sypl	Sypl	1.2e-14	38	24.3	0.27	0.136	1.6e-13	0.13781	0.66	UP
Mrps18a	Mrps18a	1.2e-14	50	38	0.39	0.212	1.6e-13	0.17619	0.4	UP
Sfpq	Sfpq	1.3e-14	352	275.4	0.88	0.702	1.7e-13	0.18049	0.35	UP
Mydgf	Mydgf	1.4e-14	68	50.9	0.46	0.263	1.8e-13	0.19429	0.42	UP
Sh3bgrl3	Sh3bgrl3	1.4e-14	1105	887.3	0.98	0.93	1.8e-13	0.04687	0.32	UP
Selenof	Selenof	1.5e-14	154	121.7	0.73	0.482	1.9e-13	0.25142	0.33	UP
Aip	Aip	1.5e-14	96	75	0.56	0.337	1.9e-13	0.22091	0.36	UP
Cisd3	Cisd3	1.5e-14	38	24.2	0.28	0.142	1.9e-13	0.14157	0.64	UP
Tdg	Tdg	1.5e-14	33	21.5	0.26	0.127	2e-13	0.13523	0.62	UP
Crlf2	Crlf2	1.6e-14	80	57.1	0.46	0.272	2.1e-13	0.18876	0.48	UP
Psmb3	Psmb3	1.7e-14	339	266.1	0.88	0.708	2.2e-13	0.17418	0.35	UP
Ormdl2	Ormdl2	1.8e-14	37	24.4	0.29	0.149	2.3e-13	0.14337	0.61	UP
Cd3d	Cd3d	1.8e-14	670	875	0.83	0.912	2.3e-13	-0.08203	-0.38	DOWN
Ap3s1	Ap3s1	1.8e-14	60	44.6	0.4	0.224	2.3e-13	0.1785	0.43	UP
Galk1	Galk1	1.8e-14	41	23.8	0.26	0.129	2.3e-13	0.13313	0.77	UP
Lamtor5	Lamtor5	1.9e-14	96	76.1	0.56	0.341	2.4e-13	0.21632	0.34	UP
Faf1	Faf1	1.9e-14	41	29.7	0.31	0.162	2.4e-13	0.15129	0.47	UP
Naxe	Naxe	1.9e-14	40	28.3	0.31	0.158	2.4e-13	0.15027	0.52	UP
Psmg2	Psmg2	2e-14	48	35.2	0.35	0.188	2.5e-13	0.1606	0.46	UP
Mbnl3	Mbnl3	2e-14	28	17.1	0.23	0.106	2.6e-13	0.12315	0.69	UP
Gclm	Gclm	2.1e-14	61	38	0.33	0.179	2.6e-13	0.15371	0.69	UP
0610010K14Rik	0610010K14Rik	2.2e-14	42	29.1	0.32	0.17	2.7e-13	0.15257	0.53	UP
Hmgxb4	Hmgxb4	2.2e-14	47	31.6	0.33	0.176	2.7e-13	0.15255	0.57	UP
Zcrb1	Zcrb1	2.2e-14	96	75	0.56	0.342	2.8e-13	0.21815	0.36	UP
Mrps14	Mrps14	2.4e-14	172	130.9	0.74	0.507	3e-13	0.2296	0.39	UP
Psmc6	Psmc6	2.4e-14	107	84.7	0.6	0.376	3.1e-13	0.22572	0.33	UP
Sell	Sell	2.5e-14	179	316.6	0.47	0.574	3.1e-13	-0.10333	-0.82	DOWN
Cdc123	Cdc123	2.5e-14	60	44.8	0.42	0.239	3.1e-13	0.18301	0.42	UP
Arpc4	Arpc4	2.5e-14	254	197.1	0.81	0.603	3.2e-13	0.21022	0.37	UP
Hsd17b12	Hsd17b12	2.7e-14	44	31.2	0.34	0.184	3.4e-13	0.15996	0.49	UP
Gatad1	Gatad1	2.7e-14	56	40.6	0.4	0.224	3.4e-13	0.17327	0.47	UP
Slc35b2	Slc35b2	2.7e-14	30	21	0.25	0.122	3.4e-13	0.13224	0.51	UP
Tmem238	Tmem238	2.7e-14	30	19.2	0.24	0.112	3.4e-13	0.12639	0.66	UP
Creg1	Creg1	2.8e-14	79	45.8	0.34	0.187	3.5e-13	0.1525	0.79	UP
Rnaseh2a	Rnaseh2a	2.9e-14	35	24.2	0.28	0.142	3.6e-13	0.14157	0.54	UP
Ssr4	Ssr4	3e-14	254	198.8	0.86	0.622	3.7e-13	0.23447	0.35	UP
Stk39	Stk39	3e-14	47	31.3	0.3	0.154	3.8e-13	0.14479	0.59	UP
Larp1b	Larp1b	3e-14	43	32.4	0.3	0.156	3.8e-13	0.14805	0.41	UP
Cnot9	Cnot9	3.1e-14	24	15.9	0.22	0.1	3.9e-13	0.1203	0.6	UP
Med30	Med30	3.3e-14	76	55.8	0.46	0.277	4e-13	0.18782	0.45	UP
Ilkap	Ilkap	3.3e-14	76	57.8	0.5	0.295	4.1e-13	0.20161	0.4	UP
G2e3	G2e3	3.3e-14	41	26.4	0.27	0.135	4.1e-13	0.13454	0.63	UP
Dap	Dap	3.5e-14	130	88.1	0.53	0.334	4.4e-13	0.19869	0.56	UP
Polr3k	Polr3k	3.6e-14	49	36.9	0.38	0.209	4.4e-13	0.17268	0.41	UP
Esd	Esd	3.7e-14	146	117.2	0.7	0.467	4.6e-13	0.23553	0.32	UP
Pmvk	Pmvk	3.7e-14	28	17.5	0.24	0.112	4.6e-13	0.12639	0.68	UP
Lcp1	Lcp1	3.7e-14	676	549.9	0.95	0.854	4.6e-13	0.0952	0.3	UP
Isg20	Isg20	3.9e-14	46	26.4	0.26	0.128	4.8e-13	0.1313	0.8	UP
Pcnp	Pcnp	4.2e-14	99	76.8	0.57	0.354	5.1e-13	0.21848	0.36	UP
Szrd1	Szrd1	4.3e-14	58	41.4	0.4	0.229	5.3e-13	0.17285	0.49	UP
Ube2j2	Ube2j2	4.3e-14	72	57.1	0.49	0.283	5.3e-13	0.20309	0.34	UP
Smn1	Smn1	4.3e-14	49	34.6	0.35	0.19	5.3e-13	0.16373	0.49	UP
Ly6c2	Ly6c2	4.4e-14	344	568.2	0.37	0.517	5.4e-13	-0.15161	-0.73	DOWN
Cyba	Cyba	4.5e-14	712	567.2	0.95	0.859	5.6e-13	0.09335	0.33	UP
Msh6	Msh6	4.6e-14	30	20	0.25	0.117	5.6e-13	0.12886	0.59	UP
Dnajc2	Dnajc2	4.7e-14	142	109.1	0.66	0.435	5.8e-13	0.22245	0.38	UP
Cltb	Cltb	4.8e-14	40	27.6	0.31	0.159	5.8e-13	0.14725	0.53	UP
Gtf3a	Gtf3a	5e-14	77	62	0.49	0.293	6e-13	0.2003	0.32	UP
Ndufb9	Ndufb9	5e-14	241	189.1	0.82	0.607	6.1e-13	0.21412	0.35	UP
Cmpk1	Cmpk1	5e-14	98	79.6	0.58	0.363	6.1e-13	0.22015	0.3	UP
Ap2m1	Ap2m1	5.1e-14	122	95.2	0.65	0.418	6.2e-13	0.22828	0.36	UP
Vmp1	Vmp1	5.1e-14	96	71.5	0.5	0.307	6.2e-13	0.19384	0.42	UP
Ppp4c	Ppp4c	5.2e-14	130	102.2	0.66	0.43	6.3e-13	0.23202	0.34	UP
Clptm1	Clptm1	5.2e-14	48	34.5	0.35	0.191	6.3e-13	0.16177	0.47	UP
Drg1	Drg1	5.2e-14	60	43.9	0.42	0.239	6.3e-13	0.1787	0.44	UP
Eef2	Eef2	5.3e-14	1150	1377.9	0.99	0.983	6.5e-13	0.00387	-0.26	DOWN
Nol12	Nol12	5.6e-14	52	40.3	0.39	0.219	6.7e-13	0.17564	0.37	UP
Prpf38a	Prpf38a	5.7e-14	48	34.7	0.37	0.203	6.8e-13	0.16354	0.48	UP
Lin9	Lin9	5.7e-14	31	19.9	0.23	0.109	6.9e-13	0.12379	0.64	UP
Polr2e	Polr2e	5.7e-14	125	97.2	0.63	0.406	6.9e-13	0.22545	0.36	UP
Pdcd1	Pdcd1	5.8e-14	50	25.6	0.22	0.105	7e-13	0.11701	0.97	UP
Surf4	Surf4	6e-14	75	57.4	0.48	0.286	7.2e-13	0.19327	0.39	UP
Isy1	Isy1	6e-14	71	50.9	0.45	0.265	7.2e-13	0.18551	0.47	UP
Mbnl1	Mbnl1	6.1e-14	651	844.1	0.94	0.924	7.3e-13	0.01812	-0.38	DOWN
Dcun1d5	Dcun1d5	6.3e-14	119	89.3	0.61	0.394	7.5e-13	0.21884	0.42	UP
Tcp11l2	Tcp11l2	6.4e-14	12	50.3	0.1	0.217	7.6e-13	-0.11631	-2.12	DOWN
Thyn1	Thyn1	6.4e-14	37	25.5	0.3	0.152	7.7e-13	0.14454	0.52	UP
Arf1	Arf1	6.5e-14	225	174.4	0.79	0.572	7.7e-13	0.22055	0.37	UP
Noc4l	Noc4l	6.5e-14	28	16.2	0.22	0.101	7.8e-13	0.11873	0.76	UP
Eif2s2	Eif2s2	6.6e-14	407	305.1	0.89	0.72	7.8e-13	0.16642	0.42	UP
Psmd9	Psmd9	6.8e-14	40	28.6	0.31	0.164	8.1e-13	0.14828	0.5	UP
Mtx2	Mtx2	6.9e-14	36	22.1	0.27	0.134	8.2e-13	0.13219	0.71	UP
Nudt1	Nudt1	7e-14	24	15.4	0.21	0.096	8.3e-13	0.11679	0.66	UP
Polr2c	Polr2c	7.1e-14	76	58.5	0.5	0.296	8.4e-13	0.20147	0.38	UP
Gzma	Gzma	7.3e-14	1591	751.2	0.28	0.155	8.6e-13	0.12987	1.08	UP
Sfxn1	Sfxn1	7.6e-14	96	70.1	0.5	0.308	9e-13	0.18847	0.46	UP
Sar1b	Sar1b	8.3e-14	63	47.8	0.43	0.25	9.8e-13	0.18349	0.4	UP
Arl1	Arl1	8.4e-14	61	47.7	0.43	0.251	9.9e-13	0.18244	0.36	UP
Arpc1a	Arpc1a	8.4e-14	57	44.6	0.41	0.236	9.9e-13	0.17845	0.36	UP
Gart	Gart	8.7e-14	62	45.3	0.4	0.222	1e-12	0.1734	0.44	UP
Psip1	Psip1	8.8e-14	182	144.2	0.72	0.493	1e-12	0.22508	0.34	UP
Hspa4l	Hspa4l	8.8e-14	34	22.7	0.24	0.115	1e-12	0.12429	0.58	UP
Bcl2a1b	Bcl2a1b	8.8e-14	105	65.7	0.41	0.243	1e-12	0.16246	0.68	UP
Pmm1	Pmm1	9.2e-14	31	19	0.24	0.116	1.1e-12	0.12468	0.71	UP
Mpc2	Mpc2	9.3e-14	111	86.4	0.63	0.391	1.1e-12	0.23441	0.36	UP
2610524H06Rik	2610524H06Rik	9.6e-14	30	18.6	0.24	0.115	1.1e-12	0.12521	0.69	UP
Tsn	Tsn	9.9e-14	179	142.1	0.75	0.514	1.2e-12	0.23571	0.33	UP
Brip1os	Brip1os	9.9e-14	32	21.6	0.25	0.125	1.2e-12	0.13014	0.55	UP
Tdp2	Tdp2	1e-13	33	22.8	0.28	0.142	1.2e-12	0.13673	0.52	UP
Ugp2	Ugp2	1e-13	34	23.3	0.27	0.134	1.2e-12	0.13363	0.56	UP
Ndufv1	Ndufv1	1e-13	78	59.3	0.48	0.285	1.2e-12	0.19145	0.4	UP
Brix1	Brix1	1.1e-13	66	48.2	0.44	0.259	1.2e-12	0.18319	0.45	UP
Tmem258	Tmem258	1.1e-13	204	161.7	0.8	0.576	1.3e-12	0.22119	0.33	UP
Pola2	Pola2	1.1e-13	30	19.3	0.24	0.119	1.3e-12	0.12584	0.66	UP
Cd9	Cd9	1.1e-13	56	34.7	0.3	0.159	1.3e-12	0.14006	0.69	UP
E2f4	E2f4	1.1e-13	69	52.3	0.44	0.26	1.3e-12	0.18305	0.4	UP
Gnl1	Gnl1	1.2e-13	46	30	0.32	0.17	1.3e-12	0.14629	0.62	UP
Prkcsh	Prkcsh	1.2e-13	72	55	0.47	0.276	1.3e-12	0.18978	0.39	UP
Lman1	Lman1	1.2e-13	40	27.8	0.29	0.149	1.4e-12	0.13906	0.51	UP
Eif4e2	Eif4e2	1.3e-13	138	106.6	0.66	0.435	1.5e-12	0.22873	0.37	UP
Haus7	Haus7	1.3e-13	23	13.7	0.2	0.089	1.5e-12	0.11119	0.74	UP
Ivns1abp	Ivns1abp	1.3e-13	78	60.1	0.48	0.284	1.5e-12	0.1925	0.38	UP
Ddx27	Ddx27	1.3e-13	94	74.7	0.52	0.321	1.5e-12	0.20032	0.34	UP
Htatip2	Htatip2	1.3e-13	35	25.4	0.28	0.141	1.5e-12	0.13831	0.47	UP
Timm22	Timm22	1.3e-13	37	26.6	0.3	0.154	1.5e-12	0.14244	0.48	UP
Thoc3	Thoc3	1.3e-13	38	28.3	0.31	0.159	1.5e-12	0.14725	0.41	UP
Hnrnpm	Hnrnpm	1.4e-13	318	244.1	0.84	0.662	1.6e-12	0.18158	0.38	UP
Emc7	Emc7	1.4e-13	75	60.4	0.49	0.292	1.6e-12	0.19704	0.32	UP
Mapk6	Mapk6	1.5e-13	32	20.6	0.24	0.117	1.7e-12	0.12507	0.61	UP
Nsun2	Nsun2	1.5e-13	80	57.8	0.46	0.274	1.7e-12	0.18234	0.47	UP
Denr	Denr	1.6e-13	112	86.7	0.62	0.395	1.8e-12	0.22694	0.37	UP
Endod1	Endod1	1.6e-13	30	17.9	0.22	0.101	1.8e-12	0.11585	0.76	UP
Cd2bp2	Cd2bp2	1.6e-13	63	47.1	0.42	0.242	1.8e-12	0.17554	0.42	UP
Ilf3	Ilf3	1.6e-13	57	41.1	0.39	0.221	1.8e-12	0.16582	0.47	UP
Ulbp1	Ulbp1	1.6e-13	26	15.2	0.2	0.09	1.9e-12	0.10962	0.77	UP
Bcas2	Bcas2	1.6e-13	126	99.1	0.65	0.426	1.9e-12	0.22851	0.34	UP
Mthfd1l	Mthfd1l	1.6e-13	36	25.1	0.29	0.149	1.9e-12	0.13997	0.53	UP
Nabp2	Nabp2	1.7e-13	51	38.1	0.38	0.211	1.9e-12	0.16482	0.42	UP
Taldo1	Taldo1	1.7e-13	239	189	0.82	0.603	1.9e-12	0.22173	0.34	UP
Gdi2	Gdi2	1.7e-13	239	186.2	0.81	0.603	2e-12	0.21113	0.36	UP
Cfdp1	Cfdp1	1.8e-13	86	64.4	0.5	0.308	2e-12	0.19566	0.41	UP
Mpc1	Mpc1	1.8e-13	84	63.9	0.51	0.312	2.1e-12	0.19774	0.39	UP
Cenpb	Cenpb	1.8e-13	60	44.4	0.41	0.233	2.1e-12	0.17388	0.42	UP
Mrpl45	Mrpl45	1.9e-13	35	23.9	0.28	0.143	2.2e-12	0.13712	0.56	UP
Mlf2	Mlf2	2e-13	71	53.6	0.45	0.265	2.2e-12	0.1812	0.4	UP
Mrps25	Mrps25	2e-13	51	38	0.37	0.209	2.3e-12	0.16352	0.43	UP
Ptprc	Ptprc	2.1e-13	1213	1488.7	0.99	0.983	2.3e-12	0.00439	-0.3	DOWN
Rheb	Rheb	2.2e-13	86	68.4	0.54	0.328	2.5e-12	0.21402	0.33	UP
Prpf19	Prpf19	2.2e-13	61	45.3	0.42	0.246	2.5e-12	0.17801	0.43	UP
Cdv3	Cdv3	2.3e-13	152	115.1	0.68	0.45	2.5e-12	0.23076	0.4	UP
Gpaa1	Gpaa1	2.3e-13	23	15.5	0.21	0.098	2.6e-12	0.11521	0.59	UP
Naa38	Naa38	2.3e-13	84	66.1	0.52	0.319	2.6e-12	0.20137	0.34	UP
Ccnh	Ccnh	2.3e-13	51	37.4	0.37	0.206	2.6e-12	0.16379	0.45	UP
Cpsf2	Cpsf2	2.4e-13	67	52.2	0.44	0.254	2.7e-12	0.18307	0.36	UP
Sidt1	Sidt1	2.5e-13	50	118.1	0.3	0.408	2.8e-12	-0.10758	-1.25	DOWN
Txnrd1	Txnrd1	2.5e-13	64	47	0.43	0.248	2.8e-12	0.17787	0.46	UP
Naa40	Naa40	2.6e-13	31	20.4	0.25	0.125	2.9e-12	0.12582	0.58	UP
Dnajc8	Dnajc8	2.7e-13	207	167	0.8	0.569	3.1e-12	0.23234	0.31	UP
Glrx	Glrx	2.7e-13	63	40	0.32	0.172	3.1e-12	0.14327	0.66	UP
Fkbp1a	Fkbp1a	2.8e-13	176	136.8	0.7	0.483	3.1e-12	0.21727	0.36	UP
Dgcr8	Dgcr8	2.8e-13	40	29.6	0.32	0.167	3.1e-12	0.148	0.43	UP
Mrpl16	Mrpl16	2.8e-13	43	31.3	0.34	0.184	3.1e-12	0.15368	0.46	UP
Hnrnpc	Hnrnpc	2.8e-13	266	213.4	0.84	0.622	3.1e-12	0.2172	0.32	UP
Atp5d	Atp5d	2.8e-13	387	317.7	0.93	0.762	3.1e-12	0.16414	0.29	UP
Ppif	Ppif	2.8e-13	34	22	0.27	0.135	3.2e-12	0.13114	0.61	UP
Nol11	Nol11	2.9e-13	52	36.2	0.34	0.191	3.2e-12	0.15169	0.52	UP
Trim59	Trim59	3e-13	65	45.2	0.37	0.214	3.3e-12	0.15682	0.53	UP
Nup54	Nup54	3e-13	36	24.8	0.27	0.14	3.3e-12	0.13504	0.53	UP
Uba1	Uba1	3.1e-13	123	94.3	0.6	0.394	3.4e-12	0.20445	0.39	UP
Pop7	Pop7	3.1e-13	48	34.9	0.36	0.199	3.4e-12	0.15911	0.47	UP
Mrpl41	Mrpl41	3.1e-13	68	50.7	0.44	0.259	3.4e-12	0.1841	0.43	UP
Chmp2a	Chmp2a	3.1e-13	185	147.1	0.75	0.529	3.5e-12	0.22388	0.33	UP
Ppp5c	Ppp5c	3.2e-13	51	36.1	0.37	0.203	3.5e-12	0.1621	0.49	UP
Nsmce1	Nsmce1	3.2e-13	97	71.2	0.51	0.323	3.5e-12	0.19102	0.45	UP
Zw10	Zw10	3.2e-13	28	18.6	0.23	0.109	3.5e-12	0.11948	0.6	UP
Rhno1	Rhno1	3.2e-13	47	32.9	0.32	0.177	3.5e-12	0.14718	0.52	UP
Mrps7	Mrps7	3.3e-13	61	46.6	0.41	0.238	3.6e-12	0.17687	0.39	UP
Ptrh2	Ptrh2	3.5e-13	32	22.4	0.27	0.135	3.8e-12	0.1331	0.5	UP
Hivep3	Hivep3	3.6e-13	77	34.3	0.21	0.099	3.9e-12	0.10984	1.16	UP
Gsk3a	Gsk3a	3.6e-13	65	51.9	0.46	0.269	4e-12	0.18903	0.32	UP
Mrpl54	Mrpl54	3.7e-13	106	78.6	0.54	0.343	4e-12	0.19263	0.43	UP
Mrpl33	Mrpl33	3.7e-13	264	210.1	0.83	0.626	4e-12	0.20868	0.33	UP
Dctn3	Dctn3	3.9e-13	122	97.6	0.63	0.406	4.3e-12	0.22022	0.32	UP
Cmss1	Cmss1	4e-13	24	14.5	0.2	0.092	4.3e-12	0.11039	0.74	UP
Rpf2	Rpf2	4e-13	46	31.1	0.32	0.177	4.4e-12	0.14574	0.57	UP
Eif4h	Eif4h	4e-13	160	125.1	0.69	0.475	4.4e-12	0.21326	0.36	UP
Tmed9	Tmed9	4.2e-13	209	166	0.79	0.567	4.6e-12	0.22293	0.33	UP
Tcof1	Tcof1	4.2e-13	153	117.7	0.67	0.454	4.6e-12	0.21217	0.37	UP
Fcf1	Fcf1	4.2e-13	68	52.5	0.46	0.276	4.6e-12	0.18834	0.38	UP
Gtf2e2	Gtf2e2	4.3e-13	29	20	0.25	0.125	4.6e-12	0.12726	0.51	UP
Oxct1	Oxct1	4.3e-13	69	55.6	0.46	0.27	4.7e-12	0.18798	0.32	UP
Ndufb4	Ndufb4	4.4e-13	132	105.8	0.69	0.452	4.8e-12	0.24161	0.32	UP
Mars	Mars	4.7e-13	29	21.2	0.26	0.131	5.1e-12	0.13102	0.47	UP
Syncrip	Syncrip	4.8e-13	184	145.7	0.73	0.502	5.2e-12	0.23053	0.34	UP
Tcf7	Tcf7	4.9e-13	175	274.9	0.53	0.619	5.3e-12	-0.08809	-0.65	DOWN
Ccdc25	Ccdc25	4.9e-13	59	44.4	0.39	0.224	5.3e-12	0.16411	0.4	UP
Arpc3	Arpc3	5e-13	490	408.6	0.96	0.823	5.4e-12	0.1334	0.26	UP
Ubac1	Ubac1	5.2e-13	50	31	0.28	0.15	5.6e-12	0.13513	0.69	UP
Slc16a1	Slc16a1	5.2e-13	38	23.7	0.24	0.122	5.6e-12	0.12269	0.69	UP
Rap1a	Rap1a	5.3e-13	211	166.4	0.79	0.571	5.7e-12	0.21729	0.35	UP
Ppp2r5d	Ppp2r5d	5.3e-13	25	15.2	0.21	0.098	5.7e-12	0.11233	0.72	UP
Rif1	Rif1	5.4e-13	171	128.5	0.67	0.46	5.9e-12	0.20926	0.41	UP
Bud31	Bud31	5.5e-13	80	63.6	0.52	0.316	5.9e-12	0.20073	0.34	UP
Hdlbp	Hdlbp	5.5e-13	84	67.7	0.51	0.314	5.9e-12	0.19943	0.3	UP
Abcf1	Abcf1	5.5e-13	175	138.8	0.71	0.49	5.9e-12	0.21672	0.33	UP
Ndufa9	Ndufa9	5.5e-13	72	56.9	0.47	0.282	5.9e-12	0.18976	0.34	UP
Fbl	Fbl	5.8e-13	210	150.3	0.7	0.509	6.2e-12	0.1944	0.48	UP
Cpox	Cpox	5.9e-13	81	46.9	0.34	0.19	6.4e-12	0.14843	0.79	UP
Hnrnpa0	Hnrnpa0	6e-13	386	310.6	0.91	0.756	6.4e-12	0.15226	0.31	UP
Arl6ip1	Arl6ip1	6e-13	568	342.9	0.83	0.69	6.4e-12	0.1426	0.73	UP
Ctbp1	Ctbp1	6.1e-13	118	93.7	0.63	0.403	6.6e-12	0.22717	0.33	UP
Pitpnb	Pitpnb	6.1e-13	45	34	0.35	0.193	6.6e-12	0.15535	0.4	UP
Bri3	Bri3	6.4e-13	81	64.8	0.5	0.301	6.8e-12	0.19582	0.33	UP
Sec13	Sec13	6.6e-13	66	51.4	0.44	0.26	7.1e-12	0.18161	0.36	UP
Vcp	Vcp	6.7e-13	221	175.7	0.79	0.573	7.2e-12	0.21375	0.33	UP
Blvrb	Blvrb	6.8e-13	85	43.8	0.26	0.136	7.3e-12	0.12342	0.96	UP
U2af2	U2af2	7e-13	129	99.3	0.63	0.418	7.4e-12	0.21625	0.37	UP
Aplp2	Aplp2	7.2e-13	67	51.1	0.38	0.218	7.6e-12	0.16178	0.38	UP
Sumo1	Sumo1	7.2e-13	175	139.5	0.74	0.516	7.6e-12	0.22551	0.32	UP
H2afj	H2afj	7.3e-13	354	286.8	0.91	0.727	7.8e-12	0.17829	0.3	UP
Snx5	Snx5	7.4e-13	118	94.3	0.62	0.394	7.8e-12	0.22171	0.32	UP
Clns1a	Clns1a	7.6e-13	69	50.2	0.44	0.263	8.1e-12	0.17611	0.46	UP
Rps19bp1	Rps19bp1	7.8e-13	39	28.1	0.3	0.16	8.2e-12	0.13953	0.47	UP
March5	March5	7.9e-13	67	48.8	0.44	0.261	8.4e-12	0.17533	0.45	UP
Ube2l6	Ube2l6	8.1e-13	50	27.2	0.2	0.096	8.6e-12	0.10815	0.89	UP
Eno1	Eno1	8.1e-13	210	165.2	0.77	0.555	8.6e-12	0.21003	0.35	UP
Erp29	Erp29	8.2e-13	113	92.9	0.62	0.398	8.7e-12	0.22235	0.28	UP
Derl2	Derl2	8.7e-13	52	39.6	0.37	0.21	9.1e-12	0.16299	0.38	UP
Pelp1	Pelp1	8.8e-13	32	20.6	0.24	0.121	9.3e-12	0.12322	0.62	UP
Klf3	Klf3	8.9e-13	128	230.9	0.49	0.568	9.4e-12	-0.0774	-0.85	DOWN
Ufm1	Ufm1	9e-13	64	51.9	0.45	0.263	9.5e-12	0.18277	0.31	UP
Mrpl2	Mrpl2	9.1e-13	37	27.9	0.31	0.166	9.6e-12	0.14186	0.43	UP
Nenf	Nenf	9.2e-13	23	15.4	0.2	0.091	9.7e-12	0.10857	0.56	UP
Lage3	Lage3	9.3e-13	50	37.9	0.39	0.226	9.8e-12	0.16776	0.4	UP
Tfam	Tfam	9.5e-13	71	58	0.47	0.282	1e-11	0.1874	0.29	UP
Triobp	Triobp	9.5e-13	44	32.6	0.33	0.18	1e-11	0.14834	0.43	UP
Lap3	Lap3	9.8e-13	37	22.3	0.24	0.12	1e-11	0.11851	0.73	UP
Tmed10	Tmed10	9.9e-13	141	110.5	0.67	0.452	1e-11	0.22238	0.36	UP
Rbx1	Rbx1	1e-12	319	258.5	0.89	0.708	1.1e-11	0.1785	0.3	UP
Pop5	Pop5	1e-12	114	88.9	0.61	0.394	1.1e-11	0.21648	0.36	UP
Bbip1	Bbip1	1e-12	66	49.9	0.43	0.254	1.1e-11	0.17209	0.41	UP
Anapc11	Anapc11	1.1e-12	103	83	0.57	0.363	1.1e-11	0.21099	0.32	UP
Brcc3	Brcc3	1.1e-12	42	33.8	0.34	0.189	1.1e-11	0.15524	0.31	UP
Nup50	Nup50	1.1e-12	72	58.2	0.47	0.281	1.1e-11	0.18702	0.3	UP
Ppp1r2	Ppp1r2	1.1e-12	52	41.5	0.39	0.219	1.1e-11	0.16648	0.32	UP
Ints10	Ints10	1.1e-12	24	16.5	0.21	0.097	1.2e-11	0.1105	0.56	UP
Itpa	Itpa	1.2e-12	40	28.7	0.31	0.168	1.2e-11	0.14172	0.48	UP
Parp2	Parp2	1.2e-12	43	33	0.34	0.185	1.2e-11	0.15119	0.39	UP
Rbmx2	Rbmx2	1.2e-12	31	21.9	0.25	0.124	1.2e-11	0.12347	0.49	UP
Nudt9	Nudt9	1.2e-12	33	23.3	0.27	0.137	1.3e-11	0.12956	0.49	UP
Hmgcr	Hmgcr	1.2e-12	43	29.7	0.3	0.161	1.3e-11	0.13992	0.53	UP
Gsr	Gsr	1.2e-12	37	27	0.28	0.149	1.3e-11	0.13565	0.45	UP
Babam1	Babam1	1.3e-12	65	53.3	0.45	0.268	1.3e-11	0.18668	0.29	UP
Ints7	Ints7	1.3e-12	33	22.7	0.26	0.136	1.3e-11	0.12865	0.53	UP
Pno1	Pno1	1.3e-12	41	25.1	0.27	0.141	1.4e-11	0.12771	0.71	UP
Ube2e1	Ube2e1	1.3e-12	68	50	0.43	0.26	1.4e-11	0.1735	0.44	UP
Ipo7	Ipo7	1.3e-12	52	38.4	0.37	0.208	1.4e-11	0.15738	0.45	UP
Rac1	Rac1	1.3e-12	242	189.7	0.8	0.611	1.4e-11	0.1903	0.35	UP
Satb1	Satb1	1.3e-12	156	282.2	0.49	0.57	1.4e-11	-0.0795	-0.85	DOWN
Wdr5	Wdr5	1.4e-12	32	21.9	0.26	0.13	1.4e-11	0.12632	0.53	UP
Lbr	Lbr	1.4e-12	223	166.9	0.72	0.521	1.5e-11	0.20011	0.42	UP
Eftud2	Eftud2	1.5e-12	62	48.1	0.42	0.244	1.5e-11	0.17292	0.37	UP
Kbtbd11	Kbtbd11	1.5e-12	55	125.6	0.32	0.42	1.5e-11	-0.09665	-1.19	DOWN
Smad7	Smad7	1.6e-12	61	128.2	0.34	0.436	1.6e-11	-0.09659	-1.07	DOWN
Dbnl	Dbnl	1.6e-12	138	112.4	0.69	0.456	1.6e-11	0.23073	0.3	UP
Tyrobp	Tyrobp	1.6e-12	351	133.2	0.23	0.125	1.6e-11	0.10659	1.4	UP
Eef1akmt1	Eef1akmt1	1.7e-12	43	33.2	0.34	0.183	1.7e-11	0.15186	0.37	UP
Abcf2	Abcf2	1.8e-12	43	30.4	0.32	0.177	1.8e-11	0.14377	0.51	UP
Ankrd11	Ankrd11	1.8e-12	377	516.5	0.89	0.86	1.8e-11	0.0333	-0.46	DOWN
Smim7	Smim7	1.8e-12	48	36.7	0.36	0.201	1.8e-11	0.15413	0.39	UP
Ndufa8	Ndufa8	1.9e-12	127	101.8	0.65	0.428	1.9e-11	0.21974	0.32	UP
9130401M01Rik	9130401M01Rik	1.9e-12	37	24.4	0.27	0.142	1.9e-11	0.12954	0.59	UP
Sdhc	Sdhc	1.9e-12	57	45.3	0.42	0.244	2e-11	0.17488	0.34	UP
Sarnp	Sarnp	2e-12	169	134.2	0.71	0.5	2e-11	0.21393	0.33	UP
Polr2h	Polr2h	2.1e-12	56	40.1	0.38	0.22	2.1e-11	0.15733	0.48	UP
Uqcrfs1	Uqcrfs1	2.1e-12	142	111.8	0.68	0.456	2.2e-11	0.22589	0.34	UP
Hdac3	Hdac3	2.1e-12	34	23.6	0.27	0.145	2.2e-11	0.13031	0.54	UP
Phf10	Phf10	2.2e-12	30	20.2	0.24	0.118	2.3e-11	0.11918	0.58	UP
Smu1	Smu1	2.3e-12	67	56	0.47	0.282	2.3e-11	0.19316	0.26	UP
Srsf6	Srsf6	2.3e-12	153	121.5	0.69	0.472	2.4e-11	0.21824	0.33	UP
Tmem126a	Tmem126a	2.3e-12	64	49.2	0.43	0.259	2.4e-11	0.17547	0.38	UP
Spcs3	Spcs3	2.3e-12	55	40.6	0.37	0.211	2.4e-11	0.1571	0.44	UP
Med28	Med28	2.4e-12	99	79.2	0.56	0.357	2.4e-11	0.20147	0.33	UP
Xbp1	Xbp1	2.4e-12	50	34.9	0.32	0.177	2.4e-11	0.14286	0.51	UP
Rilpl2	Rilpl2	2.5e-12	77	53.6	0.4	0.237	2.5e-11	0.15869	0.52	UP
Zranb2	Zranb2	2.6e-12	121	93.3	0.6	0.388	2.6e-11	0.20931	0.37	UP
Cops5	Cops5	2.7e-12	84	67.1	0.52	0.326	2.7e-11	0.19598	0.33	UP
Bri3bp	Bri3bp	2.7e-12	34	22.1	0.26	0.135	2.7e-11	0.12447	0.6	UP
Morf4l2	Morf4l2	2.7e-12	47	35.6	0.34	0.192	2.8e-11	0.1492	0.41	UP
Smarcb1	Smarcb1	2.8e-12	60	47.1	0.43	0.25	2.8e-11	0.17577	0.34	UP
Prkar1a	Prkar1a	2.8e-12	232	188.8	0.83	0.603	2.9e-11	0.22317	0.3	UP
Srbd1	Srbd1	2.9e-12	30	21	0.24	0.124	2.9e-11	0.12059	0.52	UP
Ergic2	Ergic2	2.9e-12	58	44.6	0.4	0.233	2.9e-11	0.16433	0.37	UP
Tmco4	Tmco4	2.9e-12	25	17.9	0.22	0.108	2.9e-11	0.11477	0.49	UP
Gpx1	Gpx1	3e-12	352	230.5	0.75	0.563	3e-11	0.18488	0.61	UP
Sec61b	Sec61b	3.2e-12	496	413.2	0.94	0.83	3.2e-11	0.11126	0.26	UP
Fam104a	Fam104a	3.4e-12	119	93.3	0.62	0.41	3.4e-11	0.21026	0.35	UP
Hnrnpul1	Hnrnpul1	3.5e-12	137	112.1	0.68	0.449	3.5e-11	0.22697	0.29	UP
Ubl5	Ubl5	3.6e-12	372	303.7	0.91	0.742	3.6e-11	0.16449	0.29	UP
Rnpep	Rnpep	3.7e-12	48	37.9	0.36	0.204	3.7e-11	0.1553	0.35	UP
Sec61a1	Sec61a1	3.8e-12	80	62.8	0.47	0.291	3.8e-11	0.18226	0.34	UP
Rbm14	Rbm14	3.8e-12	32	22.5	0.26	0.133	3.8e-11	0.12408	0.49	UP
Psph	Psph	3.8e-12	51	39.4	0.38	0.222	3.8e-11	0.16045	0.36	UP
Rnf7	Rnf7	3.9e-12	88	70.2	0.53	0.336	3.9e-11	0.19803	0.32	UP
Rwdd4a	Rwdd4a	4e-12	41	31.8	0.32	0.178	3.9e-11	0.14613	0.36	UP
Epsti1	Epsti1	4.1e-12	257	368.3	0.72	0.75	4.1e-11	-0.03241	-0.52	DOWN
Samsn1	Samsn1	4.2e-12	77	54.6	0.4	0.245	4.1e-11	0.15748	0.5	UP
Mzt1	Mzt1	4.2e-12	39	29.2	0.29	0.154	4.2e-11	0.13472	0.41	UP
Snx2	Snx2	4.2e-12	70	55.8	0.46	0.275	4.2e-11	0.18129	0.33	UP
Cox18	Cox18	4.3e-12	24	16.9	0.23	0.111	4.2e-11	0.11502	0.5	UP
Psmg3	Psmg3	4.6e-12	31	23.4	0.26	0.136	4.5e-11	0.12773	0.41	UP
Pigt	Pigt	4.7e-12	54	42	0.39	0.23	4.6e-11	0.16461	0.37	UP
Dkc1	Dkc1	4.7e-12	117	86.8	0.55	0.359	4.6e-11	0.18929	0.43	UP
Rad50	Rad50	4.7e-12	86	70.3	0.49	0.307	4.7e-11	0.18755	0.28	UP
Ssh2	Ssh2	4.8e-12	96	187.5	0.5	0.543	4.7e-11	-0.04551	-0.96	DOWN
Pdcl3	Pdcl3	4.8e-12	57	44.5	0.41	0.241	4.7e-11	0.1694	0.36	UP
Ehbp1l1	Ehbp1l1	4.8e-12	54	40.2	0.35	0.199	4.7e-11	0.15101	0.41	UP
Pds5b	Pds5b	4.9e-12	61	49.3	0.41	0.24	4.9e-11	0.16992	0.31	UP
Gadd45gip1	Gadd45gip1	5e-12	103	84.3	0.58	0.374	4.9e-11	0.20571	0.29	UP
Hcfc1	Hcfc1	5.2e-12	68	54.2	0.46	0.28	5.1e-11	0.18179	0.32	UP
Naa20	Naa20	5.4e-12	49	37.2	0.35	0.199	5.2e-11	0.15101	0.4	UP
Cox20	Cox20	5.4e-12	113	90.3	0.59	0.387	5.3e-11	0.20696	0.33	UP
Pgrmc1	Pgrmc1	5.5e-12	34	24.6	0.27	0.144	5.4e-11	0.1294	0.45	UP
D8Ertd738e	D8Ertd738e	5.7e-12	235	190.4	0.81	0.601	5.6e-11	0.21232	0.3	UP
Ubap2	Ubap2	5.7e-12	51	40.6	0.38	0.218	5.6e-11	0.15943	0.33	UP
Cep83	Cep83	5.8e-12	46	32.4	0.32	0.177	5.7e-11	0.1409	0.49	UP
Gadd45b	Gadd45b	6e-12	44	28.1	0.22	0.109	5.9e-11	0.11084	0.64	UP
Nacc1	Nacc1	6.1e-12	39	29.7	0.31	0.172	6e-11	0.14131	0.4	UP
Mrps17	Mrps17	6.3e-12	67	52.5	0.46	0.276	6.1e-11	0.17971	0.35	UP
Ass1	Ass1	6.3e-12	65	38.2	0.29	0.167	6.1e-11	0.12786	0.77	UP
Dus1l	Dus1l	6.3e-12	32	23.7	0.27	0.14	6.1e-11	0.12641	0.42	UP
Pon2	Pon2	6.5e-12	56	43.6	0.38	0.22	6.3e-11	0.1568	0.36	UP
Gm8186	Gm8186	7e-12	45	35.2	0.34	0.194	6.8e-11	0.14946	0.35	UP
Arl6ip6	Arl6ip6	7e-12	35	23.4	0.26	0.138	6.8e-11	0.12367	0.59	UP
1110004E09Rik	1110004E09Rik	7.1e-12	31	20.7	0.25	0.127	6.9e-11	0.12084	0.56	UP
Rrp7a	Rrp7a	7.2e-12	49	37.6	0.36	0.205	7e-11	0.15137	0.39	UP
Pds5a	Pds5a	7.2e-12	142	112.4	0.63	0.43	7e-11	0.19984	0.33	UP
Gzmb	Gzmb	7.4e-12	257	144.6	0.3	0.172	7.1e-11	0.12548	0.83	UP
Arl5a	Arl5a	7.5e-12	48	33.7	0.33	0.186	7.3e-11	0.14347	0.52	UP
Mrps23	Mrps23	7.7e-12	79	63.5	0.5	0.312	7.4e-11	0.19198	0.31	UP
Ppm1g	Ppm1g	8e-12	134	109.8	0.68	0.457	7.7e-11	0.22052	0.29	UP
Cops4	Cops4	8.1e-12	58	45.2	0.4	0.239	7.8e-11	0.16378	0.35	UP
Gmps	Gmps	8.2e-12	71	55.1	0.44	0.271	7.9e-11	0.17254	0.37	UP
Psmg1	Psmg1	8.3e-12	29	19.9	0.25	0.129	8e-11	0.12109	0.56	UP
Bax	Bax	8.4e-12	148	120.5	0.68	0.468	8e-11	0.21721	0.3	UP
Ndufaf7	Ndufaf7	8.7e-12	25	16.3	0.21	0.104	8.4e-11	0.1089	0.64	UP
Ndufs7	Ndufs7	8.9e-12	129	108.1	0.66	0.439	8.6e-11	0.22165	0.26	UP
Exosc9	Exosc9	9e-12	31	21.7	0.26	0.136	8.6e-11	0.12289	0.5	UP
Myl12a	Myl12a	9.1e-12	403	334.9	0.92	0.749	8.7e-11	0.16576	0.27	UP
Utp11	Utp11	9.2e-12	87	67.3	0.51	0.32	8.8e-11	0.18501	0.36	UP
Rwdd1	Rwdd1	9.4e-12	159	125.2	0.69	0.481	9e-11	0.21218	0.35	UP
Pdk3	Pdk3	9.6e-12	28	19.6	0.24	0.122	9.1e-11	0.11785	0.49	UP
Eif2d	Eif2d	9.6e-12	26	18.3	0.23	0.114	9.2e-11	0.11475	0.49	UP
Wars	Wars	9.6e-12	33	23.6	0.26	0.139	9.2e-11	0.12406	0.5	UP
Mrpl11	Mrpl11	9.8e-12	49	36.5	0.35	0.203	9.3e-11	0.15112	0.42	UP
Tial1	Tial1	9.8e-12	71	57.1	0.45	0.272	9.4e-11	0.17724	0.31	UP
Eed	Eed	9.9e-12	60	48.9	0.43	0.253	9.4e-11	0.17405	0.28	UP
Poldip2	Poldip2	9.9e-12	27	16.7	0.21	0.105	9.4e-11	0.10838	0.67	UP
Lamtor1	Lamtor1	1e-11	105	83.9	0.6	0.389	9.5e-11	0.2063	0.33	UP
Yaf2	Yaf2	1e-11	36	27.4	0.28	0.148	9.7e-11	0.12951	0.39	UP
Mif4gd	Mif4gd	1.1e-11	49	37.8	0.34	0.193	1e-10	0.14815	0.38	UP
Cdc5l	Cdc5l	1.1e-11	142	117.7	0.68	0.457	1e-10	0.22249	0.27	UP
Zbtb8os	Zbtb8os	1.1e-11	75	59.7	0.48	0.296	1e-10	0.18041	0.34	UP
Vamp5	Vamp5	1.1e-11	41	28.8	0.28	0.15	1.1e-10	0.12793	0.52	UP
Ilk	Ilk	1.1e-11	82	68.5	0.52	0.319	1.1e-10	0.19705	0.27	UP
Msl3	Msl3	1.1e-11	46	36.4	0.33	0.185	1.1e-10	0.14596	0.34	UP
Cst3	Cst3	1.1e-11	135	107.2	0.64	0.423	1.1e-10	0.21583	0.33	UP
Eif3d	Eif3d	1.1e-11	148	119.3	0.7	0.48	1.1e-10	0.22095	0.31	UP
Ecd	Ecd	1.2e-11	41	29.8	0.31	0.171	1.1e-10	0.13713	0.45	UP
1700097N02Rik	1700097N02Rik	1.2e-11	44	28.9	0.25	0.131	1.1e-10	0.11899	0.62	UP
Msrb1	Msrb1	1.2e-11	45	33.5	0.32	0.179	1.1e-10	0.14167	0.43	UP
Smc5	Smc5	1.2e-11	53	43.4	0.38	0.222	1.1e-10	0.15954	0.3	UP
Samm50	Samm50	1.2e-11	75	60.8	0.5	0.315	1.1e-10	0.18739	0.31	UP
Mogs	Mogs	1.2e-11	49	36.3	0.34	0.196	1.2e-10	0.145	0.42	UP
Ppp1r7	Ppp1r7	1.3e-11	47	37.2	0.35	0.203	1.2e-10	0.14824	0.35	UP
Psmd10	Psmd10	1.3e-11	38	29.2	0.3	0.164	1.2e-10	0.13624	0.38	UP
Mpg	Mpg	1.3e-11	31	21.1	0.25	0.127	1.2e-10	0.11888	0.54	UP
Elp5	Elp5	1.3e-11	34	22.5	0.24	0.126	1.2e-10	0.11757	0.58	UP
Npm3	Npm3	1.3e-11	187	150.7	0.75	0.531	1.2e-10	0.22034	0.31	UP
Letm1	Letm1	1.3e-11	65	51.1	0.43	0.256	1.2e-10	0.1709	0.35	UP
Epb41l2	Epb41l2	1.3e-11	43	33.1	0.31	0.17	1.2e-10	0.13622	0.36	UP
Pdik1l	Pdik1l	1.3e-11	29	18.1	0.21	0.105	1.3e-10	0.10785	0.68	UP
Trmt6	Trmt6	1.4e-11	48	36.4	0.33	0.191	1.3e-10	0.14306	0.39	UP
Ftl1	Ftl1	1.4e-11	790	659.7	0.97	0.901	1.3e-10	0.07289	0.26	UP
Rrp1	Rrp1	1.4e-11	155	123.5	0.71	0.488	1.3e-10	0.21686	0.33	UP
Mrps33	Mrps33	1.4e-11	126	101.3	0.65	0.426	1.3e-10	0.22419	0.31	UP
Hsbp1	Hsbp1	1.4e-11	87	72.9	0.53	0.335	1.3e-10	0.1962	0.26	UP
Adrm1	Adrm1	1.4e-11	58	48.1	0.42	0.248	1.3e-10	0.17211	0.28	UP
Usp37	Usp37	1.5e-11	38	29	0.28	0.154	1.4e-10	0.13092	0.37	UP
Gtf2a2	Gtf2a2	1.5e-11	75	61.2	0.49	0.306	1.4e-10	0.18861	0.3	UP
Ppp2cb	Ppp2cb	1.6e-11	29	21.2	0.25	0.13	1.5e-10	0.12056	0.46	UP
Rrs1	Rrs1	1.6e-11	46	32.7	0.31	0.17	1.5e-10	0.1353	0.48	UP
9530068E07Rik	9530068E07Rik	1.6e-11	37	27.3	0.29	0.158	1.5e-10	0.133	0.43	UP
Prkrip1	Prkrip1	1.6e-11	26	18.5	0.22	0.112	1.5e-10	0.11201	0.5	UP
Mpst	Mpst	1.6e-11	37	29	0.3	0.163	1.5e-10	0.13585	0.35	UP
Asnsd1	Asnsd1	1.7e-11	45	33.7	0.34	0.192	1.6e-10	0.14489	0.41	UP
Atxn10	Atxn10	1.7e-11	66	52.3	0.44	0.269	1.6e-10	0.17176	0.33	UP
Trim27	Trim27	1.7e-11	66	54	0.45	0.272	1.6e-10	0.17384	0.29	UP
Nipsnap3b	Nipsnap3b	1.8e-11	36	27.2	0.29	0.157	1.6e-10	0.13117	0.39	UP
Tspan13	Tspan13	1.8e-11	88	64.9	0.46	0.289	1.6e-10	0.17285	0.43	UP
Exosc2	Exosc2	1.8e-11	30	20.7	0.24	0.122	1.6e-10	0.1155	0.55	UP
Trim12a	Trim12a	1.8e-11	80	154.3	0.44	0.501	1.6e-10	-0.0605	-0.95	DOWN
Nop9	Nop9	1.8e-11	29	21.1	0.25	0.13	1.7e-10	0.12004	0.47	UP
Dot1l	Dot1l	1.8e-11	46	34.4	0.32	0.179	1.7e-10	0.13932	0.41	UP
Dgka	Dgka	1.8e-11	96	176.7	0.52	0.554	1.7e-10	-0.0364	-0.88	DOWN
Taf12	Taf12	1.9e-11	64	51	0.41	0.248	1.7e-10	0.16492	0.32	UP
Mrpl22	Mrpl22	2e-11	38	29.1	0.3	0.166	1.8e-10	0.13519	0.37	UP
Bcap31	Bcap31	2e-11	144	116.4	0.69	0.475	1.8e-10	0.21705	0.3	UP
Emc4	Emc4	2e-11	41	31.6	0.32	0.179	1.9e-10	0.14167	0.38	UP
Romo1	Romo1	2.1e-11	156	124.8	0.69	0.483	1.9e-10	0.2106	0.33	UP
Cdc26	Cdc26	2.2e-11	61	50.5	0.44	0.265	2e-10	0.17348	0.28	UP
Cwc15	Cwc15	2.2e-11	159	125.6	0.7	0.486	2e-10	0.21517	0.34	UP
Hdac2	Hdac2	2.2e-11	51	40.3	0.38	0.22	2e-10	0.15589	0.34	UP
Rpia	Rpia	2.2e-11	40	30.3	0.31	0.173	2e-10	0.13791	0.41	UP
Atic	Atic	2.3e-11	72	55.4	0.44	0.273	2.1e-10	0.16991	0.37	UP
Ndfip1	Ndfip1	2.3e-11	66	50.5	0.41	0.247	2.1e-10	0.16165	0.39	UP
Cebpg	Cebpg	2.3e-11	47	37.2	0.34	0.196	2.1e-10	0.145	0.34	UP
Lck	Lck	2.5e-11	408	535	0.92	0.903	2.2e-10	0.01755	-0.39	DOWN
Mmd	Mmd	2.5e-11	25	16.8	0.2	0.1	2.3e-10	0.10447	0.56	UP
Mrpl4	Mrpl4	2.5e-11	65	54.2	0.44	0.269	2.3e-10	0.17556	0.25	UP
Grap2	Grap2	2.5e-11	89	169.6	0.5	0.542	2.3e-10	-0.04158	-0.93	DOWN
Dpysl2	Dpysl2	2.5e-11	58	43.4	0.38	0.222	2.3e-10	0.1547	0.42	UP
Fam173a	Fam173a	2.6e-11	93	77.4	0.55	0.348	2.3e-10	0.19693	0.27	UP
Eif2b5	Eif2b5	2.6e-11	33	25.3	0.28	0.15	2.3e-10	0.12885	0.37	UP
Nfkbib	Nfkbib	2.6e-11	50	37.9	0.35	0.204	2.3e-10	0.14667	0.39	UP
Nfyc	Nfyc	2.6e-11	31	23.6	0.27	0.146	2.4e-10	0.12586	0.38	UP
Polr1d	Polr1d	2.7e-11	269	224	0.85	0.652	2.4e-10	0.19823	0.27	UP
Serpinb9	Serpinb9	2.7e-11	72	51.4	0.33	0.189	2.4e-10	0.13744	0.49	UP
Rrp1b	Rrp1b	2.7e-11	51	34.7	0.3	0.171	2.4e-10	0.13085	0.56	UP
Trappc5	Trappc5	2.8e-11	54	42.8	0.39	0.229	2.5e-10	0.16082	0.32	UP
Sfr1	Sfr1	2.9e-11	140	115.2	0.64	0.43	2.6e-10	0.209	0.28	UP
Ruvbl2	Ruvbl2	2.9e-11	40	30.5	0.31	0.169	2.6e-10	0.13635	0.41	UP
Tmem248	Tmem248	2.9e-11	37	29	0.29	0.159	2.6e-10	0.13143	0.36	UP
Fasn	Fasn	2.9e-11	43	31.1	0.32	0.183	2.6e-10	0.13891	0.48	UP
Minpp1	Minpp1	3e-11	30	20.3	0.24	0.125	2.7e-10	0.11575	0.54	UP
Adk	Adk	3e-11	42	30.8	0.29	0.16	2.7e-10	0.12802	0.44	UP
Taf6	Taf6	3.2e-11	31	23.3	0.26	0.137	2.8e-10	0.12093	0.41	UP
Htatsf1	Htatsf1	3.2e-11	56	45.2	0.38	0.224	2.9e-10	0.15547	0.31	UP
Rab24	Rab24	3.2e-11	43	35	0.33	0.189	2.9e-10	0.14372	0.31	UP
Sf3b2	Sf3b2	3.3e-11	316	261.2	0.87	0.689	2.9e-10	0.17727	0.28	UP
Mea1	Mea1	3.3e-11	53	44.2	0.39	0.228	2.9e-10	0.15951	0.27	UP
Lamtor4	Lamtor4	3.3e-11	129	107.7	0.64	0.423	2.9e-10	0.21727	0.26	UP
Rbm17	Rbm17	3.4e-11	79	63.1	0.49	0.31	3.1e-10	0.1797	0.32	UP
Cyb5r3	Cyb5r3	3.5e-11	39	30.2	0.31	0.173	3.1e-10	0.13647	0.39	UP
Atf1	Atf1	3.5e-11	52	42.1	0.39	0.228	3.1e-10	0.15899	0.31	UP
Wdr61	Wdr61	3.5e-11	67	52	0.41	0.252	3.1e-10	0.16072	0.36	UP
Sucla2	Sucla2	3.5e-11	40	30.5	0.32	0.181	3.1e-10	0.13813	0.41	UP
Nap1l4	Nap1l4	3.5e-11	131	109.9	0.66	0.445	3.1e-10	0.21966	0.26	UP
Stt3a	Stt3a	3.6e-11	53	42.3	0.38	0.223	3.1e-10	0.15705	0.32	UP
Cox19	Cox19	3.6e-11	29	21.2	0.25	0.132	3.2e-10	0.11846	0.46	UP
Spg21	Spg21	3.6e-11	51	41.2	0.37	0.219	3.2e-10	0.15497	0.32	UP
Vrk1	Vrk1	3.7e-11	54	41.9	0.38	0.222	3.2e-10	0.1547	0.36	UP
Yeats4	Yeats4	3.7e-11	88	72.4	0.53	0.339	3.2e-10	0.19147	0.28	UP
Nop2	Nop2	3.9e-11	28	18.3	0.22	0.11	3.4e-10	0.10691	0.63	UP
Sec61g	Sec61g	4.1e-11	442	366.2	0.92	0.795	3.6e-10	0.12436	0.27	UP
Gabpb1	Gabpb1	4.1e-11	28	19.8	0.23	0.119	3.6e-10	0.11289	0.48	UP
Wwp2	Wwp2	4.1e-11	43	32.9	0.31	0.176	3.6e-10	0.13672	0.39	UP
Asna1	Asna1	4.2e-11	38	29.8	0.31	0.172	3.7e-10	0.1332	0.36	UP
Urod	Urod	4.2e-11	43	30	0.27	0.152	3.7e-10	0.12243	0.54	UP
Qk	Qk	4.3e-11	54	42.8	0.36	0.21	3.8e-10	0.14808	0.35	UP
Odf2	Odf2	4.3e-11	49	35.7	0.33	0.191	3.8e-10	0.13731	0.47	UP
Cep57l1	Cep57l1	4.5e-11	34	23.3	0.25	0.13	3.9e-10	0.11572	0.56	UP
Arpc5	Arpc5	4.5e-11	404	329.9	0.9	0.729	3.9e-10	0.17134	0.29	UP
Pacsin2	Pacsin2	4.6e-11	29	22	0.23	0.119	4e-10	0.11237	0.41	UP
Chchd10	Chchd10	4.6e-11	59	37.7	0.3	0.172	4e-10	0.12601	0.66	UP
Tmem147	Tmem147	4.8e-11	46	35.7	0.32	0.184	4.2e-10	0.13694	0.38	UP
Chd3	Chd3	4.8e-11	180	291.8	0.71	0.694	4.2e-10	0.01662	-0.69	DOWN
Ets1	Ets1	4.8e-11	474	623.1	0.9	0.875	4.2e-10	0.02147	-0.39	DOWN
Atp1a1	Atp1a1	4.9e-11	163	132.5	0.71	0.49	4.2e-10	0.2162	0.29	UP
Bud23	Bud23	4.9e-11	43	34.1	0.34	0.192	4.3e-10	0.14436	0.32	UP
Pam16	Pam16	5e-11	61	49.9	0.43	0.263	4.4e-10	0.16983	0.28	UP
Nudt19	Nudt19	5.2e-11	44	32.5	0.32	0.182	4.5e-10	0.13708	0.44	UP
Camkk2	Camkk2	5.3e-11	35	23.9	0.26	0.138	4.6e-10	0.11988	0.53	UP
Htra2	Htra2	5.5e-11	24	15.8	0.2	0.1	4.8e-10	0.10251	0.6	UP
Josd2	Josd2	5.6e-11	37	26.6	0.28	0.155	4.8e-10	0.12556	0.46	UP
Stard3nl	Stard3nl	5.7e-11	36	28.3	0.29	0.161	4.9e-10	0.13076	0.33	UP
Slc1a5	Slc1a5	5.9e-11	95	76.2	0.51	0.326	5.1e-10	0.18015	0.32	UP
Necap2	Necap2	5.9e-11	46	36.4	0.35	0.205	5.1e-10	0.14849	0.32	UP
Gusb	Gusb	6e-11	42	34.2	0.33	0.187	5.2e-10	0.14242	0.31	UP
Mrps15	Mrps15	6.1e-11	79	66.3	0.52	0.324	5.2e-10	0.19285	0.26	UP
Zcchc11	Zcchc11	6.4e-11	125	207.5	0.55	0.593	5.5e-10	-0.04219	-0.73	DOWN
Bclaf3	Bclaf3	6.6e-11	28	19.3	0.23	0.117	5.7e-10	0.10924	0.53	UP
Nme2	Nme2	6.6e-11	29	20.7	0.24	0.127	5.7e-10	0.11312	0.5	UP
Eif3a	Eif3a	6.8e-11	405	329.6	0.89	0.737	5.8e-10	0.15051	0.3	UP
Nol7	Nol7	7.1e-11	264	217.8	0.84	0.646	6.1e-10	0.19538	0.28	UP
Taf15	Taf15	7.6e-11	124	104	0.64	0.423	6.5e-10	0.21295	0.26	UP
Baz1a	Baz1a	7.6e-11	153	122.7	0.65	0.45	6.5e-10	0.20054	0.32	UP
Amfr	Amfr	7.7e-11	46	37.7	0.34	0.194	6.6e-10	0.14658	0.3	UP
Polr2g	Polr2g	7.7e-11	95	78.2	0.57	0.365	6.6e-10	0.20169	0.28	UP
Pigq	Pigq	7.8e-11	41	25.7	0.24	0.127	6.7e-10	0.11221	0.68	UP
Rexo2	Rexo2	7.9e-11	148	117.1	0.67	0.469	6.7e-10	0.20465	0.34	UP
Metap1	Metap1	8e-11	35	26.1	0.27	0.145	6.8e-10	0.12115	0.42	UP
Mphosph8	Mphosph8	8e-11	78	63.9	0.46	0.288	6.8e-10	0.17338	0.29	UP
Utp18	Utp18	8e-11	58	44.1	0.36	0.213	6.8e-10	0.14545	0.39	UP
Lrrfip2	Lrrfip2	8.1e-11	33	23.5	0.25	0.132	6.9e-10	0.11559	0.48	UP
Znhit3	Znhit3	8.3e-11	24	16.6	0.2	0.099	7.1e-10	0.10121	0.56	UP
Aven	Aven	8.7e-11	46	37.4	0.34	0.198	7.4e-10	0.14342	0.31	UP
Tmbim4	Tmbim4	8.9e-11	37	29	0.29	0.162	7.5e-10	0.12971	0.37	UP
Cyb561d2	Cyb561d2	9e-11	33	26.2	0.27	0.148	7.6e-10	0.12376	0.35	UP
Dtnb	Dtnb	9.2e-11	26	18.5	0.22	0.111	7.8e-10	0.10639	0.49	UP
Mtpn	Mtpn	9.3e-11	119	98.1	0.61	0.402	7.9e-10	0.20664	0.28	UP
Ndufb5	Ndufb5	9.4e-11	189	152.8	0.76	0.559	7.9e-10	0.20203	0.31	UP
Usp39	Usp39	9.5e-11	38	29.9	0.31	0.174	8e-10	0.13398	0.36	UP
Clpp	Clpp	9.5e-11	40	30.5	0.3	0.17	8.1e-10	0.13099	0.4	UP
Nfu1	Nfu1	9.7e-11	49	40.5	0.38	0.224	8.2e-10	0.1526	0.28	UP
Vamp8	Vamp8	9.8e-11	160	126.4	0.65	0.449	8.2e-10	0.20591	0.34	UP
Pithd1	Pithd1	9.9e-11	28	19.4	0.22	0.112	8.4e-10	0.10678	0.51	UP
Evl	Evl	1e-10	126	204.8	0.56	0.595	8.5e-10	-0.03658	-0.71	DOWN
Hist1h1c	Hist1h1c	1e-10	151	97	0.47	0.321	8.7e-10	0.15427	0.64	UP
Sc5d	Sc5d	1e-10	28	21.1	0.22	0.112	8.7e-10	0.10769	0.42	UP
Ndufs4	Ndufs4	1.1e-10	124	103.2	0.66	0.445	8.9e-10	0.21443	0.26	UP
Rb1	Rb1	1.1e-10	36	26.9	0.26	0.143	8.9e-10	0.11894	0.44	UP
Arpc5l	Arpc5l	1.1e-10	154	126.8	0.7	0.482	9.1e-10	0.21597	0.28	UP
Trnau1ap	Trnau1ap	1.1e-10	39	30.8	0.31	0.174	9.1e-10	0.13398	0.35	UP
Cenpv	Cenpv	1.1e-10	28	19.4	0.22	0.116	9.3e-10	0.10833	0.52	UP
Nmt2	Nmt2	1.1e-10	43	34.5	0.32	0.18	9.3e-10	0.13631	0.31	UP
Pigyl	Pigyl	1.1e-10	33	24.8	0.25	0.136	9.4e-10	0.1191	0.4	UP
Haus8	Haus8	1.1e-10	36	27.5	0.28	0.155	9.4e-10	0.12412	0.39	UP
Dad1	Dad1	1.1e-10	327	269.5	0.89	0.71	9.5e-10	0.18215	0.28	UP
Adh5	Adh5	1.2e-10	91	75.9	0.55	0.355	9.6e-10	0.1935	0.27	UP
1700017B05Rik	1700017B05Rik	1.2e-10	30	20.4	0.23	0.118	9.7e-10	0.10819	0.54	UP
Rab1b	Rab1b	1.2e-10	67	54.1	0.44	0.276	9.9e-10	0.16872	0.31	UP
Stk16	Stk16	1.2e-10	40	32.5	0.32	0.183	9.9e-10	0.13799	0.32	UP
Tnfrsf18	Tnfrsf18	1.2e-10	87	68.9	0.47	0.297	1e-09	0.16876	0.34	UP
Cdk6	Cdk6	1.2e-10	79	63.2	0.42	0.257	1e-09	0.16122	0.32	UP
Hadha	Hadha	1.2e-10	102	83.6	0.57	0.374	1e-09	0.19852	0.28	UP
Bysl	Bysl	1.3e-10	29	21.2	0.24	0.125	1.1e-09	0.11234	0.45	UP
Chmp6	Chmp6	1.3e-10	28	20.4	0.24	0.128	1.1e-09	0.11403	0.44	UP
Med14	Med14	1.3e-10	31	23	0.25	0.133	1.1e-09	0.11453	0.42	UP
Ccdc86	Ccdc86	1.3e-10	37	24	0.24	0.128	1.1e-09	0.11063	0.62	UP
Mrpl50	Mrpl50	1.3e-10	28	22.2	0.25	0.133	1.1e-09	0.11689	0.36	UP
Uxt	Uxt	1.4e-10	26	16.4	0.21	0.106	1.1e-09	0.10157	0.64	UP
Eif4enif1	Eif4enif1	1.4e-10	40	32.9	0.31	0.173	1.1e-09	0.13503	0.28	UP
Nars	Nars	1.4e-10	93	76.1	0.51	0.328	1.1e-09	0.17948	0.29	UP
Mrpl3	Mrpl3	1.4e-10	44	36.6	0.35	0.2	1.2e-09	0.14564	0.27	UP
Mrpl39	Mrpl39	1.4e-10	26	21.3	0.24	0.125	1.2e-09	0.11378	0.3	UP
M6pr	M6pr	1.4e-10	104	79.5	0.53	0.353	1.2e-09	0.1769	0.38	UP
Atad3a	Atad3a	1.5e-10	47	28.1	0.26	0.146	1.2e-09	0.11435	0.75	UP
Ncbp1	Ncbp1	1.5e-10	50	40.8	0.37	0.223	1.2e-09	0.15077	0.29	UP
Capns1	Capns1	1.5e-10	169	141.8	0.74	0.516	1.3e-09	0.21922	0.26	UP
Sart3	Sart3	1.6e-10	38	29.8	0.3	0.166	1.3e-09	0.13035	0.34	UP
Rrp15	Rrp15	1.6e-10	44	30.8	0.29	0.164	1.3e-09	0.12526	0.51	UP
Dpp3	Dpp3	1.6e-10	45	37	0.35	0.201	1.3e-09	0.14406	0.29	UP
Leprot	Leprot	1.6e-10	31	24.8	0.24	0.13	1.3e-09	0.11481	0.35	UP
Mmadhc	Mmadhc	1.6e-10	30	21.1	0.23	0.12	1.3e-09	0.10988	0.49	UP
Tmx1	Tmx1	1.7e-10	45	36.9	0.32	0.183	1.4e-09	0.13603	0.29	UP
Xrcc6	Xrcc6	1.7e-10	38	28.2	0.28	0.156	1.4e-09	0.12307	0.43	UP
Pdia4	Pdia4	1.7e-10	64	50.7	0.41	0.252	1.4e-09	0.15693	0.34	UP
Cep295	Cep295	1.7e-10	53	43.1	0.36	0.217	1.4e-09	0.147	0.31	UP
Smc6	Smc6	1.7e-10	224	180.3	0.74	0.546	1.4e-09	0.19359	0.31	UP
Prdx3	Prdx3	1.8e-10	61	46.7	0.4	0.245	1.4e-09	0.1546	0.38	UP
Gorasp2	Gorasp2	1.8e-10	42	31.5	0.3	0.172	1.4e-09	0.13032	0.4	UP
Eif2b1	Eif2b1	1.8e-10	26	20.1	0.23	0.122	1.4e-09	0.11066	0.39	UP
Dhrs4	Dhrs4	1.8e-10	22	15.4	0.2	0.101	1.5e-09	0.10055	0.53	UP
Lrpap1	Lrpap1	1.9e-10	28	21.9	0.25	0.132	1.6e-09	0.1165	0.34	UP
Exosc5	Exosc5	2e-10	68	55.9	0.45	0.282	1.7e-09	0.17014	0.28	UP
Parl	Parl	2.2e-10	47	36.5	0.34	0.2	1.7e-09	0.13844	0.37	UP
Fbxo7	Fbxo7	2.2e-10	24	18.2	0.21	0.104	1.7e-09	0.10223	0.4	UP
Hsph1	Hsph1	2.2e-10	80	59.6	0.41	0.258	1.8e-09	0.1535	0.43	UP
Mrpl23	Mrpl23	2.3e-10	144	119.5	0.68	0.461	1.8e-09	0.21488	0.27	UP
Dynlrb1	Dynlrb1	2.3e-10	147	120.7	0.67	0.466	1.8e-09	0.20492	0.28	UP
Tpm3-rs7	Tpm3-rs7	2.3e-10	24	16.8	0.2	0.102	1.9e-09	0.10041	0.53	UP
Pycr2	Pycr2	2.3e-10	51	41.8	0.37	0.221	1.9e-09	0.14999	0.3	UP
Bad	Bad	2.3e-10	23	17.1	0.22	0.114	1.9e-09	0.10755	0.41	UP
Sin3b	Sin3b	2.4e-10	129	106.4	0.65	0.444	1.9e-09	0.21117	0.28	UP
Tecpr1	Tecpr1	2.4e-10	78	150.5	0.44	0.496	1.9e-09	-0.05237	-0.95	DOWN
Pus1	Pus1	2.4e-10	34	25.6	0.26	0.146	1.9e-09	0.11919	0.42	UP
Acp5	Acp5	2.5e-10	98	173.6	0.52	0.552	2e-09	-0.03665	-0.82	DOWN
Desi1	Desi1	2.5e-10	42	33.6	0.32	0.188	2e-09	0.13614	0.34	UP
Uck1	Uck1	2.6e-10	27	17.2	0.2	0.103	2.1e-09	0.09988	0.63	UP
Fcho1	Fcho1	2.6e-10	57	45	0.38	0.233	2.1e-09	0.15086	0.35	UP
9930111J21Rik2	9930111J21Rik2	2.7e-10	89	170.6	0.46	0.512	2.1e-09	-0.0476	-0.94	DOWN
Tfdp2	Tfdp2	2.7e-10	49	32.7	0.25	0.14	2.1e-09	0.11293	0.59	UP
Lyrm9	Lyrm9	2.7e-10	29	20.8	0.23	0.125	2.2e-09	0.10947	0.5	UP
Ei24	Ei24	2.7e-10	43	35.3	0.34	0.197	2.2e-09	0.14107	0.28	UP
Mtx1	Mtx1	2.7e-10	33	26.4	0.28	0.154	2.2e-09	0.1232	0.32	UP
Aldh9a1	Aldh9a1	2.7e-10	31	24	0.26	0.14	2.2e-09	0.11725	0.36	UP
Slc4a1	Slc4a1	2.7e-10	177	74.1	0.24	0.135	2.2e-09	0.1038	1.25	UP
Got1	Got1	2.8e-10	29	20.8	0.23	0.122	2.2e-09	0.1083	0.48	UP
Snrnp27	Snrnp27	2.8e-10	87	71.7	0.51	0.329	2.2e-09	0.17608	0.28	UP
Bnip2	Bnip2	2.8e-10	73	61.6	0.47	0.296	2.3e-09	0.17322	0.25	UP
Kdm2b	Kdm2b	2.9e-10	59	42.6	0.33	0.197	2.3e-09	0.13388	0.46	UP
Ftsj3	Ftsj3	2.9e-10	68	49.9	0.38	0.236	2.3e-09	0.14535	0.46	UP
Actn1	Actn1	2.9e-10	44	109	0.27	0.356	2.3e-09	-0.09009	-1.31	DOWN
Npc2	Npc2	3.1e-10	221	334.6	0.78	0.744	2.5e-09	0.03577	-0.6	DOWN
Xpnpep1	Xpnpep1	3.1e-10	26	19.6	0.23	0.118	2.5e-09	0.10766	0.4	UP
Nfatc2ip	Nfatc2ip	3.1e-10	26	17.3	0.21	0.106	2.5e-09	0.10105	0.57	UP
Tfg	Tfg	3.2e-10	34	25.4	0.28	0.158	2.5e-09	0.12293	0.4	UP
Mcrs1	Mcrs1	3.2e-10	44	34.8	0.33	0.195	2.5e-09	0.13833	0.34	UP
Rpap3	Rpap3	3.2e-10	23	16.1	0.2	0.104	2.6e-09	0.1008	0.51	UP
Ifrd2	Ifrd2	3.3e-10	33	22.5	0.23	0.121	2.6e-09	0.10595	0.55	UP
Rbmx	Rbmx	3.3e-10	41	31.9	0.31	0.176	2.6e-09	0.13044	0.36	UP
Ttc1	Ttc1	3.4e-10	37	31	0.3	0.171	2.7e-09	0.13085	0.26	UP
Sympk	Sympk	3.8e-10	42	34.8	0.32	0.188	3e-09	0.13614	0.28	UP
Ndufa1	Ndufa1	3.8e-10	202	163	0.78	0.567	3e-09	0.20854	0.31	UP
Arl6ip4	Arl6ip4	3.9e-10	74	61.8	0.48	0.308	3e-09	0.17499	0.26	UP
Cand1	Cand1	3.9e-10	42	32.7	0.32	0.185	3e-09	0.13393	0.37	UP
1190007I07Rik	1190007I07Rik	3.9e-10	30	21.7	0.24	0.13	3e-09	0.11141	0.47	UP
Armc1	Armc1	3.9e-10	49	40.8	0.37	0.222	3e-09	0.14803	0.28	UP
Slc25a3	Slc25a3	4e-10	472	395.8	0.94	0.82	3.1e-09	0.11693	0.25	UP
Pcnt	Pcnt	4e-10	74	61.7	0.44	0.277	3.2e-09	0.16767	0.25	UP
Tgs1	Tgs1	4.2e-10	49	40.2	0.34	0.202	3.3e-09	0.13922	0.29	UP
Ccr2	Ccr2	4.3e-10	99	66.9	0.28	0.168	3.4e-09	0.11726	0.57	UP
Utp3	Utp3	4.4e-10	121	99.4	0.61	0.414	3.4e-09	0.19887	0.29	UP
Dnttip1	Dnttip1	4.7e-10	40	33.5	0.32	0.188	3.7e-09	0.1347	0.25	UP
Cul1	Cul1	4.7e-10	64	53.4	0.44	0.276	3.7e-09	0.16585	0.27	UP
Srp19	Srp19	4.8e-10	124	102.6	0.61	0.41	3.7e-09	0.19823	0.27	UP
Fdxr	Fdxr	5.1e-10	30	23.3	0.25	0.136	4e-09	0.11335	0.37	UP
Farsb	Farsb	5.3e-10	45	36.4	0.34	0.199	4.1e-09	0.13609	0.31	UP
Peli1	Peli1	5.4e-10	152	249.5	0.62	0.631	4.2e-09	-0.01044	-0.72	DOWN
Tm2d3	Tm2d3	5.5e-10	32	25.3	0.26	0.142	4.2e-09	0.11711	0.34	UP
Bcl11b	Bcl11b	5.5e-10	196	286.6	0.62	0.668	4.3e-09	-0.0454	-0.55	DOWN
Senp1	Senp1	5.9e-10	55	45.4	0.38	0.235	4.6e-09	0.14928	0.27	UP
Sec23b	Sec23b	6e-10	38	30.1	0.31	0.18	4.6e-09	0.13108	0.35	UP
Elovl1	Elovl1	6.1e-10	44	35.6	0.33	0.192	4.7e-09	0.13626	0.32	UP
Lzic	Lzic	6.1e-10	28	19.5	0.23	0.123	4.7e-09	0.10673	0.52	UP
Xrcc1	Xrcc1	6.1e-10	24	16.6	0.21	0.107	4.7e-09	0.1	0.5	UP
Ethe1	Ethe1	6.2e-10	26	19.5	0.21	0.111	4.7e-09	0.10207	0.42	UP
Plrg1	Plrg1	6.3e-10	26	20.8	0.23	0.121	4.8e-09	0.10792	0.32	UP
Mettl26	Mettl26	6.3e-10	46	37.9	0.35	0.205	4.8e-09	0.1413	0.28	UP
Eprs	Eprs	6.3e-10	143	113.7	0.61	0.421	4.8e-09	0.18772	0.33	UP
Znrd1	Znrd1	6.4e-10	68	57	0.46	0.295	4.9e-09	0.16851	0.26	UP
Tiprl	Tiprl	6.5e-10	53	43.5	0.38	0.233	4.9e-09	0.15138	0.28	UP
Ssbp3	Ssbp3	6.5e-10	76	61.7	0.43	0.271	4.9e-09	0.1605	0.3	UP
Kti12	Kti12	6.5e-10	37	28.2	0.28	0.159	4.9e-09	0.12135	0.39	UP
Ifi213	Ifi213	6.5e-10	25	73.5	0.17	0.269	4.9e-09	-0.09442	-1.56	DOWN
Slc35a4	Slc35a4	6.8e-10	40	32.6	0.31	0.179	5.1e-09	0.12872	0.3	UP
Cactin	Cactin	6.9e-10	29	22.1	0.24	0.129	5.3e-09	0.10867	0.4	UP
Prps1	Prps1	7e-10	36	29.5	0.29	0.167	5.3e-09	0.12498	0.28	UP
Nup188	Nup188	7.3e-10	25	17.8	0.21	0.11	5.6e-09	0.10116	0.48	UP
Bola1	Bola1	7.6e-10	33	25.7	0.26	0.141	5.8e-09	0.11476	0.35	UP
Ubr7	Ubr7	7.8e-10	35	27.3	0.27	0.152	5.9e-09	0.11955	0.36	UP
Commd3	Commd3	7.9e-10	81	67.7	0.49	0.316	5.9e-09	0.17771	0.26	UP
Fkbp8	Fkbp8	7.9e-10	151	127	0.71	0.499	5.9e-09	0.20582	0.25	UP
Pop4	Pop4	8e-10	28	21.2	0.24	0.132	6.1e-09	0.11074	0.41	UP
Gng5	Gng5	8.1e-10	374	314.6	0.93	0.773	6.1e-09	0.15651	0.25	UP
Nsa2	Nsa2	8.1e-10	458	592.3	0.9	0.864	6.1e-09	0.0397	-0.37	DOWN
B9d2	B9d2	8.1e-10	27	21.8	0.23	0.123	6.1e-09	0.10817	0.28	UP
Eef1e1	Eef1e1	8.3e-10	49	36.7	0.32	0.192	6.2e-09	0.12997	0.43	UP
Lsm1	Lsm1	8.4e-10	58	47.8	0.42	0.26	6.3e-09	0.15911	0.29	UP
Tmem183a	Tmem183a	8.6e-10	30	23.7	0.25	0.139	6.5e-09	0.11254	0.33	UP
Tufm	Tufm	8.6e-10	47	38	0.34	0.201	6.5e-09	0.13831	0.3	UP
Sdhaf1	Sdhaf1	8.7e-10	42	29.5	0.28	0.159	6.5e-09	0.11756	0.49	UP
Ctsz	Ctsz	8.8e-10	54	42.4	0.35	0.211	6.6e-09	0.13604	0.35	UP
Itm2a	Itm2a	8.8e-10	60	37.2	0.27	0.154	6.6e-09	0.11457	0.7	UP
Bag6	Bag6	9e-10	57	46.8	0.41	0.253	6.7e-09	0.15535	0.28	UP
Ift27	Ift27	9e-10	37	29.5	0.28	0.158	6.8e-09	0.11953	0.34	UP
Ptrhd1	Ptrhd1	9.3e-10	25	19.6	0.23	0.12	7e-09	0.10609	0.35	UP
Gtf2f2	Gtf2f2	9.4e-10	31	25.7	0.25	0.137	7e-09	0.11321	0.29	UP
Dcp2	Dcp2	9.4e-10	45	36	0.32	0.19	7e-09	0.13208	0.33	UP
Usp5	Usp5	9.5e-10	31	23.7	0.26	0.146	7.1e-09	0.11579	0.38	UP
Mrpl46	Mrpl46	9.7e-10	39	32	0.32	0.184	7.3e-09	0.13066	0.3	UP
Tyw1	Tyw1	1e-09	26	21.1	0.22	0.118	7.4e-09	0.10479	0.31	UP
Zbtb20	Zbtb20	1e-09	62	139.8	0.27	0.36	7.8e-09	-0.09377	-1.18	DOWN
Cuta	Cuta	1.1e-09	107	89.9	0.57	0.389	8e-09	0.18472	0.25	UP
Smarcc2	Smarcc2	1.1e-09	63	50.8	0.41	0.26	8.3e-09	0.15427	0.31	UP
Sh2d2a	Sh2d2a	1.1e-09	148	121.8	0.63	0.443	8.4e-09	0.19155	0.28	UP
Cops2	Cops2	1.1e-09	47	38.5	0.34	0.204	8.5e-09	0.13712	0.29	UP
Osbpl3	Osbpl3	1.2e-09	51	40.9	0.29	0.171	8.5e-09	0.12222	0.32	UP
Gnpnat1	Gnpnat1	1.2e-09	33	23.9	0.23	0.129	8.6e-09	0.10579	0.48	UP
Klf13	Klf13	1.2e-09	155	235.6	0.68	0.672	8.7e-09	0.01188	-0.61	DOWN
Tsfm	Tsfm	1.2e-09	39	31.8	0.31	0.179	8.7e-09	0.12781	0.31	UP
Mettl1	Mettl1	1.2e-09	48	32.1	0.27	0.162	8.8e-09	0.11297	0.58	UP
Fdx1	Fdx1	1.2e-09	28	23.4	0.25	0.137	8.9e-09	0.11373	0.27	UP
S100a4	S100a4	1.2e-09	643	508	0.46	0.308	9e-09	0.14818	0.34	UP
Trappc3	Trappc3	1.2e-09	43	35.7	0.32	0.19	9.1e-09	0.13116	0.27	UP
Toe1	Toe1	1.2e-09	22	17.1	0.2	0.102	9.1e-09	0.09753	0.34	UP
Znhit1	Znhit1	1.3e-09	35	29.2	0.28	0.161	9.5e-09	0.12213	0.27	UP
Ehmt2	Ehmt2	1.3e-09	56	47	0.38	0.235	9.8e-09	0.14784	0.25	UP
Slf1	Slf1	1.4e-09	32	25.2	0.24	0.135	9.9e-09	0.11008	0.35	UP
Smarcd2	Smarcd2	1.4e-09	69	57.4	0.46	0.292	1e-08	0.16682	0.27	UP
Yif1a	Yif1a	1.4e-09	28	21.2	0.23	0.125	1e-08	0.10568	0.4	UP
Nudt16l1	Nudt16l1	1.4e-09	38	30.6	0.31	0.183	1e-08	0.12884	0.33	UP
Fcer1g	Fcer1g	1.4e-09	282	125.4	0.26	0.16	1e-08	0.09584	1.17	UP
Lcmt1	Lcmt1	1.5e-09	25	18.9	0.22	0.12	1.1e-08	0.10321	0.38	UP
Rflnb	Rflnb	1.5e-09	20	63.5	0.13	0.221	1.1e-08	-0.09317	-1.7	DOWN
Pgd	Pgd	1.6e-09	42	34.6	0.33	0.198	1.1e-08	0.1357	0.27	UP
Slc25a37	Slc25a37	1.6e-09	112	59.2	0.28	0.171	1.1e-08	0.11214	0.92	UP
Dnlz	Dnlz	1.6e-09	34	24.6	0.26	0.147	1.1e-08	0.11094	0.47	UP
Tbc1d10b	Tbc1d10b	1.6e-09	44	35.9	0.32	0.187	1.2e-08	0.13091	0.3	UP
Ctcf	Ctcf	1.7e-09	217	178.7	0.77	0.571	1.2e-08	0.19426	0.28	UP
Cd3e	Cd3e	1.7e-09	386	497.9	0.76	0.822	1.2e-08	-0.06215	-0.37	DOWN
1110004F10Rik	1110004F10Rik	1.7e-09	152	125.4	0.68	0.483	1.2e-08	0.19478	0.28	UP
Sgta	Sgta	1.7e-09	40	33.4	0.32	0.192	1.2e-08	0.13194	0.26	UP
Mycbp	Mycbp	1.8e-09	22	17.9	0.2	0.106	1.3e-08	0.09817	0.29	UP
Fmr1	Fmr1	1.8e-09	67	53.7	0.39	0.248	1.3e-08	0.14622	0.32	UP
Helb	Helb	1.8e-09	36	28.8	0.28	0.157	1.3e-08	0.11966	0.33	UP
Pnrc1	Pnrc1	1.9e-09	146	229.5	0.64	0.638	1.3e-08	-0.00249	-0.65	DOWN
Qdpr	Qdpr	1.9e-09	44	35.7	0.33	0.199	1.3e-08	0.1323	0.32	UP
Sap30bp	Sap30bp	1.9e-09	31	24	0.25	0.143	1.4e-08	0.11174	0.35	UP
Hmox2	Hmox2	2e-09	56	46.5	0.39	0.241	1.4e-08	0.14873	0.26	UP
Fxr2	Fxr2	2e-09	33	27.5	0.28	0.159	1.4e-08	0.119	0.27	UP
Echs1	Echs1	2e-09	42	35.3	0.33	0.199	1.4e-08	0.13465	0.26	UP
Hbs1l	Hbs1l	2e-09	36	28.1	0.26	0.15	1.5e-08	0.11446	0.37	UP
Sf3a2	Sf3a2	2.1e-09	57	47.1	0.41	0.256	1.5e-08	0.15507	0.27	UP
Mrpl55	Mrpl55	2.1e-09	34	27	0.28	0.16	1.5e-08	0.11886	0.35	UP
Trir	Trir	2.2e-09	238	197.4	0.81	0.628	1.5e-08	0.18447	0.27	UP
Pms2	Pms2	2.2e-09	30	23.2	0.24	0.131	1.5e-08	0.108	0.35	UP
Crip1	Crip1	2.3e-09	1734	1284.7	0.9	0.902	1.6e-08	0.00134	0.43	UP
Sod1	Sod1	2.3e-09	94	78.2	0.53	0.353	1.6e-08	0.17402	0.26	UP
Tarbp2	Tarbp2	2.3e-09	27	21.3	0.23	0.125	1.6e-08	0.10515	0.35	UP
Hnrnpdl	Hnrnpdl	2.3e-09	183	151.4	0.74	0.538	1.6e-08	0.202	0.27	UP
Nmd3	Nmd3	2.3e-09	42	34.4	0.32	0.192	1.7e-08	0.1305	0.29	UP
Nrf1	Nrf1	2.4e-09	52	42.4	0.36	0.221	1.7e-08	0.13901	0.29	UP
Npat	Npat	2.5e-09	30	24.2	0.25	0.138	1.8e-08	0.11124	0.31	UP
Ifi203	Ifi203	2.6e-09	222	322.8	0.7	0.704	1.8e-08	-0.00147	-0.54	DOWN
Tnfrsf1a	Tnfrsf1a	2.6e-09	29	20.1	0.2	0.106	1.8e-08	0.09529	0.52	UP
Eif4g1	Eif4g1	2.6e-09	177	145.8	0.72	0.518	1.8e-08	0.2047	0.28	UP
Ykt6	Ykt6	2.7e-09	37	29.2	0.27	0.158	1.9e-08	0.11665	0.36	UP
Polr1c	Polr1c	2.7e-09	41	34.1	0.32	0.185	1.9e-08	0.13014	0.25	UP
Mrpl36	Mrpl36	2.7e-09	81	65.4	0.48	0.314	1.9e-08	0.16254	0.3	UP
Ifi208	Ifi208	2.8e-09	39	92.3	0.23	0.323	2e-08	-0.08812	-1.25	DOWN
Pkp3	Pkp3	2.9e-09	75	60	0.39	0.248	2e-08	0.1419	0.32	UP
Ss18l2	Ss18l2	2.9e-09	24	18.1	0.2	0.107	2.1e-08	0.0962	0.39	UP
Rfk	Rfk	3e-09	27	22.5	0.24	0.131	2.1e-08	0.10604	0.28	UP
Slfn2	Slfn2	3.2e-09	227	320	0.71	0.704	2.2e-08	0.0052	-0.5	DOWN
Slc3a2	Slc3a2	3.2e-09	120	95.9	0.56	0.377	2.3e-08	0.1815	0.33	UP
Ranbp3	Ranbp3	3.2e-09	35	27.5	0.27	0.156	2.3e-08	0.11587	0.36	UP
Heatr1	Heatr1	3.3e-09	40	30.1	0.27	0.158	2.3e-08	0.1143	0.42	UP
Timm44	Timm44	3.3e-09	58	45.8	0.38	0.242	2.3e-08	0.14192	0.35	UP
Fuca2	Fuca2	3.4e-09	25	20.3	0.21	0.111	2.4e-08	0.09867	0.29	UP
Smc4	Smc4	3.7e-09	449	370.9	0.8	0.66	2.6e-08	0.13999	0.27	UP
Clec2d	Clec2d	3.8e-09	151	244.1	0.65	0.644	2.6e-08	0.00899	-0.69	DOWN
Mrpl19	Mrpl19	3.9e-09	54	44.5	0.38	0.232	2.7e-08	0.1438	0.29	UP
Trnt1	Trnt1	4e-09	47	39.5	0.34	0.208	2.7e-08	0.13291	0.25	UP
Bop1	Bop1	4e-09	45	34.3	0.31	0.187	2.8e-08	0.12372	0.38	UP
Nop53	Nop53	4.1e-09	200	284.2	0.77	0.736	2.8e-08	0.03214	-0.51	DOWN
Ppan	Ppan	4.3e-09	55	39.7	0.32	0.196	2.9e-08	0.12486	0.47	UP
Prpf3	Prpf3	4.3e-09	27	18.7	0.2	0.107	3e-08	0.09477	0.5	UP
CAAA01118383.1	CAAA01118383.1	4.4e-09	37	28.5	0.28	0.16	3e-08	0.11599	0.36	UP
Shc1	Shc1	4.7e-09	27	19.9	0.22	0.119	3.2e-08	0.09942	0.44	UP
Orc2	Orc2	4.7e-09	29	23.1	0.24	0.136	3.2e-08	0.10706	0.34	UP
Arhgef1	Arhgef1	4.8e-09	247	333.9	0.8	0.762	3.2e-08	0.03752	-0.44	DOWN
Nsd3	Nsd3	4.8e-09	144	231.3	0.65	0.643	3.3e-08	0.01004	-0.68	DOWN
Nfs1	Nfs1	4.8e-09	31	25.5	0.26	0.146	3.3e-08	0.11147	0.26	UP
Rbm15	Rbm15	4.8e-09	32	25.3	0.26	0.147	3.3e-08	0.11094	0.32	UP
Ppp1r8	Ppp1r8	4.9e-09	23	18.9	0.21	0.113	3.3e-08	0.09853	0.3	UP
Hax1	Hax1	4.9e-09	28	22	0.23	0.13	3.3e-08	0.10421	0.37	UP
Med11	Med11	4.9e-09	34	26.3	0.27	0.154	3.3e-08	0.11222	0.36	UP
Psmb9	Psmb9	4.9e-09	277	230.2	0.79	0.632	3.3e-08	0.16065	0.27	UP
Zdhhc6	Zdhhc6	4.9e-09	26	20.9	0.22	0.119	3.3e-08	0.09995	0.33	UP
Cenpq	Cenpq	5e-09	39	32.8	0.3	0.18	3.4e-08	0.12388	0.26	UP
Pwp1	Pwp1	5.2e-09	25	18.8	0.21	0.111	3.5e-08	0.09579	0.43	UP
Acot9	Acot9	5.4e-09	30	24.4	0.25	0.142	3.7e-08	0.10992	0.31	UP
Cbx6	Cbx6	5.4e-09	37	28.5	0.27	0.154	3.7e-08	0.11313	0.36	UP
C2cd5	C2cd5	5.4e-09	47	37	0.32	0.198	3.7e-08	0.12616	0.34	UP
Zdhhc21	Zdhhc21	5.6e-09	44	35.3	0.31	0.188	3.8e-08	0.12463	0.32	UP
Cotl1	Cotl1	5.7e-09	476	393.7	0.89	0.781	3.8e-08	0.11213	0.27	UP
Tsc22d3	Tsc22d3	5.7e-09	58	128.7	0.33	0.399	3.8e-08	-0.07079	-1.16	DOWN
Tpd52l2	Tpd52l2	5.7e-09	49	40.6	0.35	0.214	3.8e-08	0.13668	0.26	UP
Aprt	Aprt	5.7e-09	150	118.5	0.61	0.44	3.8e-08	0.1688	0.34	UP
Ap2a1	Ap2a1	5.8e-09	32	25.2	0.25	0.143	3.9e-08	0.10834	0.33	UP
Mettl16	Mettl16	6e-09	43	34.6	0.3	0.175	4e-08	0.12142	0.3	UP
Magt1	Magt1	6e-09	77	61.9	0.44	0.29	4e-08	0.1531	0.32	UP
Mpv17l2	Mpv17l2	6.5e-09	36	29.7	0.29	0.171	4.4e-08	0.11986	0.29	UP
Rcl1	Rcl1	6.6e-09	31	20.3	0.21	0.114	4.4e-08	0.09369	0.62	UP
Spcs2	Spcs2	6.7e-09	230	191.1	0.8	0.62	4.4e-08	0.17849	0.27	UP
Bcap29	Bcap29	6.9e-09	46	37.7	0.33	0.197	4.6e-08	0.12812	0.29	UP
Cd82	Cd82	7.1e-09	153	121.3	0.59	0.422	4.7e-08	0.17175	0.33	UP
Nedd1	Nedd1	7.1e-09	24	17.7	0.2	0.107	4.7e-08	0.09424	0.42	UP
Cpsf4	Cpsf4	7.2e-09	26	18.7	0.21	0.114	4.8e-08	0.09513	0.5	UP
Serpinb6b	Serpinb6b	7.2e-09	114	82.7	0.4	0.269	4.8e-08	0.13435	0.46	UP
Utp6	Utp6	7.4e-09	24	19.1	0.21	0.117	4.9e-08	0.09773	0.32	UP
Hmces	Hmces	7.4e-09	25	18.4	0.2	0.109	4.9e-08	0.09358	0.45	UP
Nop16	Nop16	7.5e-09	32	20.6	0.22	0.12	5e-08	0.09549	0.62	UP
Vps4a	Vps4a	7.6e-09	32	26.6	0.25	0.143	5e-08	0.10834	0.27	UP
Rabac1	Rabac1	7.7e-09	109	178.6	0.56	0.572	5.1e-08	-0.01489	-0.72	DOWN
Stk17b	Stk17b	8.1e-09	244	345.7	0.79	0.758	5.4e-08	0.03218	-0.5	DOWN
Smim12	Smim12	8.1e-09	37	30.1	0.29	0.172	5.4e-08	0.11881	0.29	UP
Donson	Donson	8.4e-09	23	17.2	0.2	0.108	5.6e-08	0.09371	0.41	UP
Klrb1c	Klrb1c	8.4e-09	98	51.9	0.2	0.113	5.6e-08	0.08702	0.91	UP
Eif5b	Eif5b	8.6e-09	268	214.6	0.79	0.605	5.7e-08	0.18797	0.32	UP
Ypel3	Ypel3	9.2e-09	72	137.3	0.41	0.46	6.1e-08	-0.05169	-0.94	DOWN
Slco3a1	Slco3a1	9.4e-09	43	100.1	0.27	0.349	6.1e-08	-0.07842	-1.21	DOWN
Plaa	Plaa	9.4e-09	45	36.9	0.33	0.201	6.1e-08	0.12588	0.3	UP
Ddx49	Ddx49	9.8e-09	34	27.7	0.27	0.157	6.4e-08	0.11247	0.28	UP
Snrpd3	Snrpd3	9.9e-09	223	183.7	0.79	0.598	6.4e-08	0.18905	0.28	UP
Clk1	Clk1	1.1e-08	152	246.9	0.65	0.625	7e-08	0.02647	-0.7	DOWN
Ufd1	Ufd1	1.1e-08	40	33.1	0.31	0.19	7e-08	0.12397	0.28	UP
Ewsr1	Ewsr1	1.1e-08	201	167.7	0.77	0.575	7e-08	0.19582	0.26	UP
Otub1	Otub1	1.1e-08	47	39.7	0.36	0.224	7e-08	0.13729	0.25	UP
Pef1	Pef1	1.1e-08	24	17.7	0.2	0.109	7.3e-08	0.09266	0.46	UP
Ap1g2	Ap1g2	1.1e-08	39	32.9	0.3	0.18	7.3e-08	0.12192	0.25	UP
Heg1	Heg1	1.2e-08	30	20.7	0.21	0.116	7.8e-08	0.09303	0.54	UP
Hacd3	Hacd3	1.2e-08	33	23.4	0.23	0.13	7.8e-08	0.09846	0.51	UP
Ubqln1	Ubqln1	1.2e-08	48	39.9	0.33	0.202	7.8e-08	0.12862	0.26	UP
Mybbp1a	Mybbp1a	1.2e-08	124	92.3	0.5	0.344	7.9e-08	0.15221	0.42	UP
Hadh	Hadh	1.2e-08	37	30.6	0.28	0.166	8e-08	0.11596	0.27	UP
S100a11	S100a11	1.2e-08	424	328.5	0.76	0.643	8e-08	0.11273	0.37	UP
Acot8	Acot8	1.3e-08	31	25.8	0.25	0.145	8.1e-08	0.10729	0.26	UP
Anp32a	Anp32a	1.3e-08	309	260.1	0.86	0.696	8.3e-08	0.16704	0.25	UP
Aatf	Aatf	1.3e-08	41	32.5	0.28	0.169	8.4e-08	0.11621	0.32	UP
Cwc22	Cwc22	1.3e-08	38	31.7	0.29	0.173	8.4e-08	0.11724	0.27	UP
Agpat5	Agpat5	1.3e-08	46	37.8	0.33	0.199	8.6e-08	0.12798	0.28	UP
Lmo4	Lmo4	1.4e-08	46	32.5	0.27	0.163	8.9e-08	0.10852	0.52	UP
Cox17	Cox17	1.5e-08	221	184.9	0.77	0.589	9.4e-08	0.18556	0.26	UP
Agtpbp1	Agtpbp1	1.6e-08	29	22	0.22	0.122	1e-07	0.09771	0.41	UP
Cwc27	Cwc27	1.7e-08	27	19	0.21	0.116	1.1e-07	0.0925	0.5	UP
Wdr46	Wdr46	1.7e-08	34	26.1	0.25	0.141	1.1e-07	0.10469	0.37	UP
Prkcq	Prkcq	1.7e-08	117	190.1	0.57	0.584	1.1e-07	-0.01312	-0.7	DOWN
Oxsr1	Oxsr1	1.8e-08	43	32.4	0.27	0.157	1.1e-07	0.10907	0.39	UP
Gpd2	Gpd2	1.8e-08	31	25	0.23	0.132	1.1e-07	0.1012	0.32	UP
Cfap36	Cfap36	1.8e-08	30	22.5	0.23	0.13	1.1e-07	0.09898	0.41	UP
Zdhhc5	Zdhhc5	1.8e-08	30	24.1	0.24	0.141	1.1e-07	0.10377	0.32	UP
Sdcbp	Sdcbp	1.9e-08	113	95.2	0.59	0.407	1.2e-07	0.18124	0.25	UP
Ndufaf4	Ndufaf4	1.9e-08	55	41.4	0.31	0.19	1.2e-07	0.11769	0.41	UP
Wdr77	Wdr77	2e-08	30	22.8	0.23	0.131	1.2e-07	0.09937	0.41	UP
Ptpn18	Ptpn18	2e-08	564	689.4	0.94	0.931	1.3e-07	0.01037	-0.29	DOWN
Gnl2	Gnl2	2.2e-08	46	36.6	0.31	0.191	1.4e-07	0.11951	0.32	UP
Yipf4	Yipf4	2.3e-08	50	41.8	0.36	0.227	1.4e-07	0.13414	0.26	UP
Zfp593	Zfp593	2.3e-08	51	40	0.33	0.203	1.4e-07	0.12326	0.34	UP
Relb	Relb	2.3e-08	38	29	0.25	0.149	1.4e-07	0.10452	0.38	UP
2610002M06Rik	2610002M06Rik	2.4e-08	33	27.5	0.27	0.159	1.5e-07	0.11181	0.26	UP
Pfdn5	Pfdn5	2.4e-08	440	550	0.94	0.9	1.5e-07	0.04373	-0.32	DOWN
Mrps18b	Mrps18b	2.5e-08	37	30.6	0.28	0.169	1.5e-07	0.11425	0.26	UP
Kctd20	Kctd20	2.5e-08	29	22.4	0.23	0.132	1.5e-07	0.09923	0.37	UP
Gimap6	Gimap6	2.5e-08	336	445.9	0.88	0.827	1.6e-07	0.04967	-0.41	DOWN
Themis	Themis	2.6e-08	69	136.8	0.36	0.424	1.6e-07	-0.06148	-0.98	DOWN
Icos	Icos	2.6e-08	66	43.6	0.28	0.179	1.6e-07	0.1057	0.61	UP
Thap12	Thap12	2.6e-08	43	34.2	0.31	0.189	1.6e-07	0.11874	0.32	UP
Cdk5rap2	Cdk5rap2	2.6e-08	33	25.3	0.24	0.139	1.6e-07	0.10156	0.38	UP
Ptcd3	Ptcd3	2.7e-08	33	26.6	0.25	0.147	1.7e-07	0.10466	0.33	UP
Naa15	Naa15	2.7e-08	136	114	0.62	0.44	1.7e-07	0.176	0.26	UP
Rce1	Rce1	2.8e-08	26	20.8	0.21	0.119	1.7e-07	0.0951	0.33	UP
Mre11a	Mre11a	2.8e-08	30	24.1	0.24	0.135	1.7e-07	0.10092	0.32	UP
Tmem209	Tmem209	3e-08	34	26.6	0.25	0.147	1.8e-07	0.1061	0.34	UP
Nip7	Nip7	3.1e-08	55	44.1	0.36	0.23	1.9e-07	0.13007	0.32	UP
Otud7b	Otud7b	3.2e-08	26	21.1	0.22	0.122	1.9e-07	0.09535	0.32	UP
Edem2	Edem2	3.2e-08	24	19	0.21	0.118	1.9e-07	0.09472	0.35	UP
Npm1	Npm1	3.4e-08	1386	1049.4	0.97	0.932	2e-07	0.03666	0.4	UP
Fam60a	Fam60a	3.5e-08	44	36.1	0.32	0.194	2.1e-07	0.12212	0.27	UP
Gramd3	Gramd3	3.5e-08	63	127	0.35	0.414	2.1e-07	-0.06157	-1.02	DOWN
Pik3cd	Pik3cd	3.7e-08	95	168.2	0.52	0.536	2.2e-07	-0.01945	-0.82	DOWN
Mrps30	Mrps30	3.8e-08	38	29.5	0.27	0.164	2.3e-07	0.11087	0.36	UP
Serp1	Serp1	3.8e-08	101	84.7	0.52	0.354	2.3e-07	0.17009	0.26	UP
Fbxl6	Fbxl6	4e-08	32	25.5	0.25	0.147	2.4e-07	0.10466	0.34	UP
Abce1	Abce1	4.1e-08	76	62.1	0.43	0.284	2.4e-07	0.14358	0.3	UP
Noc3l	Noc3l	4.1e-08	33	23.6	0.21	0.121	2.5e-07	0.09156	0.5	UP
Nampt	Nampt	4.4e-08	23	18	0.2	0.111	2.6e-07	0.09056	0.37	UP
Armt1	Armt1	4.5e-08	28	21.4	0.22	0.123	2.7e-07	0.09378	0.38	UP
Fam169b	Fam169b	4.6e-08	44	100.3	0.28	0.349	2.7e-07	-0.07031	-1.19	DOWN
Ccl5	Ccl5	4.6e-08	3204	7713.3	0.59	0.621	2.7e-07	-0.03551	-1.27	DOWN
Crebrf	Crebrf	4.6e-08	26	69.1	0.18	0.262	2.7e-07	-0.08092	-1.41	DOWN
Zfp330	Zfp330	4.6e-08	48	39.4	0.33	0.209	2.7e-07	0.12376	0.29	UP
Cnot11	Cnot11	4.7e-08	29	23.3	0.23	0.136	2.8e-07	0.09896	0.31	UP
Exosc10	Exosc10	5e-08	43	36.4	0.31	0.189	2.9e-07	0.11874	0.26	UP
Cep85	Cep85	5.4e-08	27	20.9	0.2	0.114	3.1e-07	0.09029	0.35	UP
Nop10	Nop10	5.4e-08	288	231.5	0.83	0.656	3.2e-07	0.17441	0.31	UP
Laptm5	Laptm5	5.5e-08	585	719.1	0.96	0.932	3.2e-07	0.02606	-0.3	DOWN
Cct4	Cct4	6e-08	185	153	0.75	0.555	3.5e-07	0.1942	0.27	UP
Atp11b	Atp11b	6.2e-08	111	176.4	0.56	0.566	3.6e-07	-0.01055	-0.67	DOWN
Nfkb1	Nfkb1	6.2e-08	164	131.5	0.66	0.472	3.6e-07	0.18658	0.32	UP
Ncoa7	Ncoa7	6.8e-08	44	36.3	0.3	0.182	3.9e-07	0.11458	0.28	UP
Gpx4	Gpx4	6.8e-08	270	221	0.79	0.638	3.9e-07	0.15343	0.29	UP
Scd2	Scd2	7e-08	36	27.2	0.24	0.14	4e-07	0.09763	0.39	UP
Klhdc3	Klhdc3	7.3e-08	26	20.6	0.22	0.123	4.2e-07	0.09286	0.33	UP
Cops7a	Cops7a	7.7e-08	30	23.9	0.23	0.136	4.4e-07	0.09699	0.34	UP
Rrp8	Rrp8	7.9e-08	31	25.3	0.25	0.147	4.5e-07	0.10231	0.3	UP
Lpgat1	Lpgat1	7.9e-08	25	19.1	0.2	0.114	4.5e-07	0.08885	0.41	UP
Mrpl1	Mrpl1	8.7e-08	31	25.6	0.24	0.144	4.9e-07	0.10062	0.28	UP
Wdr75	Wdr75	8.7e-08	36	29.2	0.26	0.153	4.9e-07	0.1032	0.3	UP
Znhit6	Znhit6	8.8e-08	38	27.4	0.24	0.146	5e-07	0.09761	0.47	UP
Ahsa2	Ahsa2	8.9e-08	23	19	0.21	0.116	5e-07	0.09106	0.28	UP
Stk38	Stk38	9.1e-08	112	187.2	0.57	0.572	5.1e-07	-0.00679	-0.74	DOWN
Mrps10	Mrps10	9.5e-08	37	29.4	0.27	0.165	5.3e-07	0.10694	0.33	UP
Gm26917	Gm26917	9.8e-08	526	657.5	0.88	0.854	5.5e-07	0.0281	-0.32	DOWN
Cd160	Cd160	9.9e-08	128	103.9	0.41	0.28	5.6e-07	0.12855	0.31	UP
Coro2a	Coro2a	1e-07	44	34.4	0.26	0.162	5.6e-07	0.1029	0.36	UP
Lrpprc	Lrpprc	1.1e-07	43	35	0.29	0.181	6.2e-07	0.11132	0.29	UP
Eif3j1	Eif3j1	1.1e-07	159	128	0.62	0.463	6.3e-07	0.16098	0.31	UP
Tmem11	Tmem11	1.2e-07	31	25.2	0.25	0.151	6.4e-07	0.1019	0.32	UP
Slfn1	Slfn1	1.3e-07	41	94.8	0.26	0.327	7.2e-07	-0.06839	-1.21	DOWN
Fam220a	Fam220a	1.3e-07	37	29	0.24	0.14	7.3e-07	0.09619	0.34	UP
Pes1	Pes1	1.4e-07	49	39.9	0.33	0.208	7.6e-07	0.11761	0.3	UP
Dapl1	Dapl1	1.4e-07	131	222.8	0.18	0.27	7.7e-07	-0.09403	-0.76	DOWN
Npepl1	Npepl1	1.4e-07	44	36.1	0.32	0.202	7.8e-07	0.11711	0.3	UP
Grina	Grina	1.4e-07	61	47.4	0.32	0.199	7.9e-07	0.11647	0.36	UP
Nufip1	Nufip1	1.4e-07	29	22.8	0.23	0.132	7.9e-07	0.09348	0.35	UP
Thoc1	Thoc1	1.5e-07	24	19.4	0.2	0.115	8.1e-07	0.08832	0.3	UP
Timp2	Timp2	1.5e-07	39	30.6	0.25	0.151	8.2e-07	0.09955	0.35	UP
Hspbp1	Hspbp1	1.6e-07	37	29.7	0.27	0.163	8.5e-07	0.10329	0.31	UP
Snip1	Snip1	1.8e-07	25	20.5	0.21	0.12	9.6e-07	0.08974	0.29	UP
Noc2l	Noc2l	1.8e-07	79	64.3	0.42	0.286	9.9e-07	0.13716	0.3	UP
Aen	Aen	1.9e-07	31	23.3	0.22	0.131	1e-06	0.09165	0.4	UP
Nrip1	Nrip1	1.9e-07	129	103.2	0.51	0.352	1e-06	0.1544	0.32	UP
Bet1	Bet1	2e-07	25	20.5	0.21	0.121	1.1e-06	0.08921	0.27	UP
Tada3	Tada3	2e-07	28	23.6	0.24	0.14	1.1e-06	0.09711	0.26	UP
Clpx	Clpx	2.1e-07	24	20	0.21	0.123	1.1e-06	0.08999	0.28	UP
Pcyt2	Pcyt2	2.1e-07	26	21.3	0.21	0.121	1.1e-06	0.09012	0.31	UP
Tnfrsf1b	Tnfrsf1b	2.2e-07	38	29.1	0.25	0.153	1.2e-06	0.09836	0.39	UP
Xist	Xist	2.2e-07	1408	1169.9	0.97	0.895	1.2e-06	0.072	0.27	UP
Gmeb1	Gmeb1	2.2e-07	24	19.3	0.21	0.12	1.2e-06	0.08738	0.3	UP
Hmgcs1	Hmgcs1	2.4e-07	33	25.4	0.22	0.127	1.2e-06	0.09062	0.36	UP
Cdc27	Cdc27	2.4e-07	25	20.8	0.2	0.117	1.3e-06	0.08713	0.28	UP
Tsr1	Tsr1	2.7e-07	36	29.3	0.26	0.156	1.4e-06	0.10057	0.3	UP
Ddx6	Ddx6	2.9e-07	164	235.3	0.69	0.663	1.5e-06	0.0318	-0.52	DOWN
Agtrap	Agtrap	3.1e-07	33	27.3	0.25	0.153	1.6e-06	0.09888	0.26	UP
Faf2	Faf2	3.2e-07	43	36.4	0.31	0.195	1.6e-06	0.11243	0.26	UP
Ikzf2	Ikzf2	3.2e-07	255	198.1	0.42	0.294	1.7e-06	0.12443	0.37	UP
Tmem70	Tmem70	3.2e-07	26	20.6	0.22	0.126	1.7e-06	0.08971	0.32	UP
Timm10	Timm10	3.3e-07	34	28.2	0.26	0.158	1.7e-06	0.09991	0.25	UP
Pde7a	Pde7a	3.3e-07	65	123.1	0.4	0.441	1.7e-06	-0.03709	-0.92	DOWN
Miip	Miip	3.5e-07	31	25.6	0.24	0.14	1.8e-06	0.09567	0.27	UP
Mrpl10	Mrpl10	3.6e-07	31	25.7	0.25	0.152	1.9e-06	0.09849	0.27	UP
Ptger4	Ptger4	3.7e-07	35	28.2	0.22	0.133	1.9e-06	0.09099	0.32	UP
Ddx5	Ddx5	4.1e-07	873	1043.9	0.98	0.952	2.1e-06	0.02911	-0.26	DOWN
Traf2	Traf2	4.2e-07	28	23.6	0.23	0.139	2.1e-06	0.09384	0.27	UP
Dock10	Dock10	4.7e-07	170	242	0.67	0.652	2.4e-06	0.01838	-0.51	DOWN
Dusp1	Dusp1	5e-07	48	33.8	0.23	0.14	2.5e-06	0.08756	0.5	UP
Fam189b	Fam189b	5.3e-07	68	130.5	0.43	0.458	2.6e-06	-0.0246	-0.93	DOWN
St3gal4	St3gal4	5.3e-07	26	20.7	0.21	0.121	2.7e-06	0.08633	0.31	UP
Ncf4	Ncf4	5.5e-07	50	41.1	0.32	0.209	2.7e-06	0.11172	0.27	UP
Mycbp2	Mycbp2	5.8e-07	200	282.1	0.76	0.702	2.9e-06	0.05531	-0.5	DOWN
Bcl2l1	Bcl2l1	6.3e-07	28	21.6	0.2	0.117	3.1e-06	0.08282	0.36	UP
Ppm1d	Ppm1d	6.5e-07	26	21.8	0.2	0.119	3.2e-06	0.08412	0.27	UP
Ly6a	Ly6a	7.1e-07	260	171.7	0.41	0.307	3.5e-06	0.10698	0.6	UP
Tmx2	Tmx2	8.3e-07	24	20.2	0.21	0.12	4e-06	0.08542	0.26	UP
Scml4	Scml4	8.6e-07	23	55	0.17	0.238	4.2e-06	-0.07205	-1.25	DOWN
Myh9	Myh9	8.7e-07	439	548	0.91	0.865	4.2e-06	0.041	-0.32	DOWN
Nol9	Nol9	8.7e-07	29	23.4	0.21	0.121	4.2e-06	0.08437	0.31	UP
Rbpj	Rbpj	9e-07	44	34.9	0.28	0.18	4.3e-06	0.10177	0.33	UP
mt-Nd5	mt-Nd5	9.1e-07	334	424.7	0.86	0.803	4.4e-06	0.05749	-0.35	DOWN
Kmt2a	Kmt2a	9.6e-07	151	227.4	0.65	0.618	4.6e-06	0.03042	-0.59	DOWN
Fyb	Fyb	1.1e-06	312	398.9	0.83	0.812	5.1e-06	0.02213	-0.35	DOWN
Tfip11	Tfip11	1.1e-06	25	21	0.2	0.12	5.1e-06	0.08398	0.27	UP
Kif21b	Kif21b	1.2e-06	76	133.8	0.45	0.478	5.5e-06	-0.02299	-0.82	DOWN
Arhgef18	Arhgef18	1.2e-06	55	107.7	0.36	0.407	5.6e-06	-0.0427	-0.97	DOWN
Uba6	Uba6	1.3e-06	33	26.6	0.25	0.153	5.9e-06	0.0926	0.32	UP
Iars	Iars	1.3e-06	30	23.6	0.22	0.13	5.9e-06	0.08603	0.33	UP
Slc35e1	Slc35e1	1.3e-06	24	20	0.2	0.12	6.1e-06	0.08307	0.26	UP
Ankrd44	Ankrd44	1.3e-06	180	258.3	0.69	0.675	6.1e-06	0.01971	-0.52	DOWN
Bpgm	Bpgm	1.4e-06	51	39.2	0.2	0.122	6.4e-06	0.08188	0.37	UP
Cnep1r1	Cnep1r1	1.4e-06	26	21.7	0.21	0.126	6.4e-06	0.08448	0.27	UP
Ubb	Ubb	1.6e-06	1934	1618.5	0.99	0.984	7.3e-06	0.00569	0.26	UP
Ppp2r3c	Ppp2r3c	1.7e-06	27	22.3	0.22	0.13	7.7e-06	0.08603	0.28	UP
Cd24a	Cd24a	1.7e-06	117	57.3	0.23	0.149	7.9e-06	0.0815	1.03	UP
Ifi206	Ifi206	1.8e-06	58	116.4	0.34	0.389	8.3e-06	-0.0455	-1.01	DOWN
Adcy7	Adcy7	2e-06	69	122.8	0.42	0.45	9.2e-06	-0.02536	-0.83	DOWN
Gm47283	Gm47283	2.2e-06	125	101.5	0.45	0.325	9.9e-06	0.12652	0.3	UP
Cd5	Cd5	2.5e-06	144	109.7	0.51	0.378	1.1e-05	0.12669	0.4	UP
S100a6	S100a6	2.6e-06	1140	879.6	0.59	0.475	1.1e-05	0.11254	0.37	UP
Yrdc	Yrdc	2.7e-06	35	28.9	0.25	0.159	1.2e-05	0.09258	0.26	UP
Pou2f2	Pou2f2	2.9e-06	135	111.7	0.44	0.316	1.3e-05	0.12826	0.27	UP
Gtf2i	Gtf2i	3.3e-06	95	161.2	0.53	0.527	1.4e-05	0.00296	-0.76	DOWN
Cd3eap	Cd3eap	3.5e-06	30	23.6	0.2	0.122	1.5e-05	0.07809	0.32	UP
Zfp36l2	Zfp36l2	3.8e-06	250	366	0.79	0.73	1.7e-05	0.05806	-0.55	DOWN
Gm8369	Gm8369	5.4e-06	85	154.7	0.42	0.452	2.3e-05	-0.03465	-0.86	DOWN
Itk	Itk	5.6e-06	97	151.1	0.5	0.513	2.4e-05	-0.01124	-0.64	DOWN
Klrd1	Klrd1	5.8e-06	232	287.3	0.46	0.555	2.4e-05	-0.09592	-0.31	DOWN
Bptf	Bptf	6.3e-06	186	252.8	0.74	0.688	2.6e-05	0.04883	-0.44	DOWN
S100a10	S100a10	6.5e-06	1216	944.7	0.89	0.865	2.7e-05	0.02373	0.36	UP
Srgn	Srgn	6.6e-06	601	480.2	0.92	0.82	2.7e-05	0.10254	0.32	UP
Orai2	Orai2	6.8e-06	21	53.8	0.18	0.235	2.8e-05	-0.05935	-1.37	DOWN
Kdm7a	Kdm7a	6.9e-06	38	77.9	0.26	0.314	2.9e-05	-0.05525	-1.05	DOWN
Btg2	Btg2	8.3e-06	141	220.8	0.58	0.583	3.4e-05	0.00088	-0.65	DOWN
Crlf3	Crlf3	1e-05	130	192.1	0.61	0.592	4e-05	0.01406	-0.56	DOWN
Arhgap30	Arhgap30	1.1e-05	224	298	0.78	0.73	4.2e-05	0.04799	-0.41	DOWN
Ankrd12	Ankrd12	1.3e-05	132	198.9	0.59	0.575	5e-05	0.01073	-0.59	DOWN
Traf3ip3	Traf3ip3	1.4e-05	98	150.4	0.53	0.527	5.4e-05	0.00531	-0.62	DOWN
Itpkb	Itpkb	1.4e-05	137	203.7	0.63	0.603	5.5e-05	0.02461	-0.58	DOWN
Ptpn22	Ptpn22	1.5e-05	142	209.4	0.63	0.599	5.9e-05	0.02685	-0.56	DOWN
[truncated: 181 more rows]

## Sheet: Cluster 4
	gene_name	pval	exp_case	exp_control	pct_case	pct_control	adjust_pval	pct_diff	rawLog2FoldChange	direction
Cx3cr1	Cx3cr1	3.4e-36	224	56	0.342	0.1	2.1e-33	0.23786	1.99	UP
Gzmk	Gzmk	1.6e-39	205	60	0.4	0.13	1.5e-36	0.27129	1.77	UP
Rora	Rora	1.8e-24	151	47	0.347	0.14	3.8e-22	0.20341	1.68	UP
Zeb2	Zeb2	4.7e-18	261	82	0.315	0.15	6.7e-16	0.16905	1.68	UP
Ccl5	Ccl5	2.8e-82	24469	7714	0.95	0.63	4.1e-78	0.32031	1.67	UP
Lgals3	Lgals3	1.2e-34	405	132	0.462	0.19	6e-32	0.27394	1.62	UP
S100a4	S100a4	9.4e-62	1532	502	0.717	0.31	4.6e-58	0.40971	1.61	UP
Rap1gap2	Rap1gap2	1.2e-11	75	25	0.216	0.1	8e-10	0.11499	1.58	UP
Hip1	Hip1	2.3e-13	73	25	0.231	0.1	2.1e-11	0.12725	1.52	UP
Bhlhe40	Bhlhe40	1.1e-09	87	31	0.221	0.12	5.4e-08	0.10576	1.48	UP
Ncald	Ncald	1.8e-12	66	25	0.221	0.1	1.4e-10	0.121	1.42	UP
Atxn1	Atxn1	7e-27	209	79	0.511	0.28	1.8e-24	0.23371	1.4	UP
S100a6	S100a6	2.3e-66	2269	866	0.886	0.48	1.7e-62	0.40661	1.39	UP
Itgb1	Itgb1	2.3e-38	690	267	0.737	0.49	1.9e-35	0.24564	1.37	UP
Gna15	Gna15	6.9e-10	74	30	0.243	0.13	3.6e-08	0.11128	1.31	UP
Baiap3	Baiap3	9.5e-10	73	30	0.241	0.13	4.8e-08	0.10932	1.31	UP
Cxcr6	Cxcr6	1.4e-11	176	76	0.355	0.21	9.2e-10	0.13991	1.2	UP
Gzmb	Gzmb	7.4e-23	328	145	0.392	0.17	1.4e-20	0.2176	1.18	UP
Fam129a	Fam129a	6.5e-08	77	34	0.248	0.15	2.2e-06	0.09838	1.18	UP
Osbpl3	Osbpl3	1.9e-06	90	40	0.251	0.17	4.5e-05	0.08562	1.17	UP
Nipal3	Nipal3	2.1e-06	75	33	0.231	0.15	5e-05	0.08363	1.17	UP
Ahnak	Ahnak	4.7e-46	1094	495	0.873	0.63	7.7e-43	0.24707	1.14	UP
Il18rap	Il18rap	3.1e-08	148	68	0.337	0.23	1.1e-06	0.10941	1.13	UP
Gng2	Gng2	4.9e-16	203	93	0.514	0.36	6e-14	0.15106	1.12	UP
Ccr2	Ccr2	1.4e-09	154	71	0.303	0.18	6.9e-08	0.11933	1.12	UP
Plekhb2	Plekhb2	1.5e-05	66	30	0.218	0.14	0.00028	0.0749	1.12	UP
Itga4	Itga4	1.1e-34	1023	482	0.799	0.63	6e-32	0.17158	1.09	UP
Cxcr3	Cxcr3	2e-17	242	114	0.533	0.37	2.8e-15	0.16566	1.09	UP
Gm30054	Gm30054	7.8e-08	85	40	0.268	0.17	2.6e-06	0.10246	1.09	UP
Slamf7	Slamf7	4.6e-13	186	88	0.432	0.28	4e-11	0.1522	1.08	UP
Atp2b4	Atp2b4	2.7e-07	71	34	0.243	0.15	7.8e-06	0.09604	1.08	UP
Ccl4	Ccl4	4.8e-13	218	104	0.283	0.14	4.2e-11	0.14205	1.07	UP
1110008P14Rik	1110008P14Rik	5.1e-08	107	51	0.342	0.24	1.8e-06	0.10228	1.06	UP
Runx2	Runx2	2e-07	77	37	0.268	0.17	5.9e-06	0.09668	1.06	UP
Adam19	Adam19	6.9e-06	81	39	0.253	0.17	0.00014	0.08179	1.06	UP
Tbx21	Tbx21	6.3e-09	115	56	0.337	0.22	2.7e-07	0.11624	1.05	UP
Ccr5	Ccr5	1.6e-06	107	52	0.283	0.19	3.8e-05	0.09003	1.05	UP
Il10ra	Il10ra	6.6e-06	55	27	0.206	0.13	0.00014	0.07879	1.05	UP
Arhgap26	Arhgap26	5.2e-05	64	31	0.211	0.14	0.00084	0.07061	1.04	UP
Id2	Id2	4.4e-27	618	302	0.715	0.49	1.2e-24	0.22331	1.03	UP
Hopx	Hopx	4.4e-24	289	141	0.635	0.44	8.8e-22	0.19488	1.03	UP
Nkg7	Nkg7	9.4e-60	2459	1211	0.985	0.84	3.5e-56	0.14906	1.02	UP
Slc4a7	Slc4a7	1.3e-06	99	49	0.293	0.2	3.4e-05	0.09049	1.01	UP
Prr13	Prr13	2.3e-20	294	147	0.63	0.47	3.5e-18	0.16101	1	UP
AU020206	AU020206	2e-08	158	79	0.402	0.3	7.5e-07	0.10351	1	UP
Ly6a	Ly6a	5e-21	329	167	0.524	0.3	8.3e-19	0.22352	0.98	UP
S100a10	S100a10	4.1e-57	1855	950	0.973	0.86	1.2e-53	0.11301	0.97	UP
Gzma	Gzma	1.8e-15	1452	743	0.325	0.16	2.1e-13	0.16847	0.97	UP
Txndc5	Txndc5	5.5e-05	100	51	0.293	0.22	0.00087	0.07	0.97	UP
Lgals1	Lgals1	1.6e-40	1981	1018	0.901	0.66	2e-37	0.23968	0.96	UP
Myo1f	Myo1f	1.4e-13	167	86	0.491	0.34	1.3e-11	0.1508	0.96	UP
Il18r1	Il18r1	4.8e-08	198	102	0.402	0.3	1.7e-06	0.10298	0.96	UP
Lpin1	Lpin1	0.00035	105	55	0.273	0.21	0.0041	0.06276	0.95	UP
Rnf166	Rnf166	2.7e-08	158	82	0.422	0.32	9.9e-07	0.09814	0.94	UP
Cdc42ep3	Cdc42ep3	1.9e-07	120	62	0.36	0.26	5.7e-06	0.10021	0.94	UP
Eva1b	Eva1b	3.4e-06	91	47	0.305	0.22	7.6e-05	0.08713	0.94	UP
Lsp1	Lsp1	1.2e-47	1020	534	0.931	0.81	2.2e-44	0.11865	0.93	UP
Plek	Plek	4.3e-09	164	86	0.402	0.28	1.9e-07	0.12295	0.93	UP
Klrk1	Klrk1	4.8e-11	298	157	0.377	0.23	3e-09	0.15016	0.92	UP
Thap3	Thap3	6e-06	141	74	0.375	0.3	0.00013	0.07937	0.92	UP
Ptpn4	Ptpn4	2.3e-05	83	44	0.268	0.19	0.00041	0.07724	0.92	UP
Snx10	Snx10	0.00062	61	32	0.208	0.15	0.0065	0.05867	0.92	UP
Nbeal2	Nbeal2	2.2e-08	121	64	0.397	0.28	8.2e-07	0.11273	0.91	UP
Rgs1	Rgs1	0.00014	118	63	0.266	0.19	0.0019	0.07055	0.91	UP
Spn	Spn	2.5e-20	429	230	0.722	0.6	3.9e-18	0.12303	0.9	UP
Prf1	Prf1	8.7e-10	160	86	0.397	0.27	4.4e-08	0.1306	0.9	UP
S100a11	S100a11	1.2e-27	610	331	0.799	0.64	3.4e-25	0.15634	0.88	UP
Cd48	Cd48	4e-25	466	253	0.769	0.61	9e-23	0.15756	0.88	UP
Gm8369	Gm8369	6.5e-14	272	148	0.571	0.43	6.4e-12	0.13982	0.88	UP
Glrx	Glrx	1e-05	81	44	0.273	0.19	0.0002	0.08378	0.88	UP
S100a13	S100a13	5.2e-22	404	220	0.742	0.59	9.2e-20	0.14866	0.87	UP
Ttc39b	Ttc39b	1.3e-07	129	70	0.392	0.29	4.1e-06	0.10199	0.87	UP
Gprin3	Gprin3	3.3e-05	84	46	0.256	0.18	0.00055	0.07902	0.87	UP
Ap1s2	Ap1s2	0.00014	57	31	0.231	0.16	0.0019	0.06787	0.87	UP
Ctsd	Ctsd	5.3e-29	632	348	0.844	0.71	1.7e-26	0.13689	0.86	UP
Phf11b	Phf11b	9.6e-06	129	71	0.36	0.28	0.00019	0.07814	0.86	UP
Sntb2	Sntb2	9.9e-05	92	51	0.293	0.22	0.0014	0.07105	0.86	UP
Cers4	Cers4	0.0007	96	53	0.283	0.23	0.0072	0.05482	0.86	UP
Nsmaf	Nsmaf	8.2e-05	118	66	0.35	0.28	0.0012	0.06559	0.84	UP
Cd8b1	Cd8b1	5.6e-37	1526	857	0.901	0.67	4.1e-34	0.22707	0.83	UP
Ifi27l2a	Ifi27l2a	1.4e-17	1531	859	0.764	0.66	1.9e-15	0.10321	0.83	UP
Serpina3g	Serpina3g	3.6e-05	89	50	0.236	0.16	0.00059	0.07861	0.82	UP
Itgal	Itgal	1.3e-18	365	208	0.715	0.6	2e-16	0.10981	0.81	UP
Zyx	Zyx	2.6e-15	369	210	0.68	0.57	3.1e-13	0.10975	0.81	UP
Tox	Tox	0.00022	142	81	0.34	0.28	0.0028	0.0646	0.81	UP
Gimap7	Gimap7	6.2e-11	335	192	0.598	0.5	3.8e-09	0.09618	0.8	UP
Pstpip1	Pstpip1	6.5e-09	148	85	0.459	0.35	2.8e-07	0.10593	0.79	UP
Mical1	Mical1	4.3e-05	121	70	0.362	0.29	0.0007	0.06854	0.79	UP
Rpa2	Rpa2	0.00013	108	62	0.337	0.27	0.0018	0.06527	0.79	UP
Vps54	Vps54	0.0054	65	37	0.218	0.17	0.035	0.04758	0.79	UP
Bcl2a1b	Bcl2a1b	4.7e-08	113	66	0.352	0.24	1.6e-06	0.11536	0.78	UP
S1pr4	S1pr4	1.1e-07	189	110	0.491	0.4	3.5e-06	0.09615	0.78	UP
Atp2a3	Atp2a3	0.00012	111	65	0.36	0.3	0.0017	0.05975	0.78	UP
Chsy1	Chsy1	1.9e-05	122	72	0.36	0.28	0.00034	0.07551	0.77	UP
Cd226	Cd226	3.6e-06	151	89	0.407	0.32	8.2e-05	0.0885	0.76	UP
Pttg1	Pttg1	0.0011	94	55	0.308	0.26	0.01	0.05231	0.76	UP
Crot	Crot	0.0016	87	51	0.278	0.22	0.014	0.05458	0.76	UP
AW112010	AW112010	1.1e-34	1603	954	0.94	0.84	6e-32	0.09599	0.75	UP
Lfng	Lfng	7.4e-07	152	91	0.447	0.36	2e-05	0.08249	0.75	UP
Capn2	Capn2	0.0081	66	39	0.238	0.19	0.049	0.04483	0.75	UP
Ppp1r12a	Ppp1r12a	1.4e-17	438	263	0.737	0.68	1.9e-15	0.05752	0.74	UP
Nlrc5	Nlrc5	6.5e-05	125	75	0.377	0.31	0.00099	0.06924	0.74	UP
Cited2	Cited2	0.0004	135	81	0.35	0.29	0.0045	0.06296	0.74	UP
Sh3bgrl	Sh3bgrl	0.00094	87	52	0.298	0.24	0.009	0.05657	0.74	UP
Kif13b	Kif13b	0.0057	62	37	0.228	0.18	0.037	0.04542	0.74	UP
Capg	Capg	0.0063	101	60	0.228	0.18	0.04	0.04647	0.74	UP
Rnf13	Rnf13	0.0068	54	32	0.211	0.16	0.043	0.04644	0.74	UP
Gpr68	Gpr68	0.0074	59	36	0.203	0.16	0.046	0.04583	0.74	UP
Hcst	Hcst	5.2e-24	822	497	0.893	0.82	1e-21	0.06986	0.73	UP
Itgb2	Itgb2	2.5e-13	359	216	0.687	0.61	2.3e-11	0.07936	0.73	UP
Prex1	Prex1	4.9e-10	263	158	0.571	0.48	2.7e-08	0.08832	0.73	UP
Ptpre	Ptpre	0.00034	93	56	0.295	0.23	0.0039	0.06565	0.73	UP
Pycard	Pycard	2.4e-13	480	291	0.725	0.62	2.2e-11	0.10554	0.72	UP
Myo1g	Myo1g	1.3e-06	168	102	0.469	0.39	3.3e-05	0.07539	0.72	UP
A430078G23Rik	A430078G23Rik	0.0013	77	47	0.266	0.21	0.012	0.05899	0.72	UP
Ech1	Ech1	0.0021	119	72	0.357	0.32	0.017	0.04203	0.72	UP
Fam49a	Fam49a	0.0051	61	37	0.216	0.17	0.034	0.04878	0.72	UP
Cd8a	Cd8a	1.7e-21	572	349	0.814	0.6	2.9e-19	0.21221	0.71	UP
Ikzf3	Ikzf3	1.9e-07	232	142	0.526	0.45	5.6e-06	0.07624	0.71	UP
Smap1	Smap1	2.2e-07	210	129	0.524	0.46	6.6e-06	0.06482	0.71	UP
Rasa3	Rasa3	7.4e-07	195	120	0.491	0.41	2e-05	0.07776	0.71	UP
Atp2b1	Atp2b1	1.9e-06	314	192	0.571	0.53	4.6e-05	0.03683	0.71	UP
Anxa6	Anxa6	8.5e-22	550	337	0.821	0.73	1.5e-19	0.09302	0.7	UP
Fyn	Fyn	1.2e-12	396	244	0.717	0.65	1e-10	0.06657	0.7	UP
Pglyrp1	Pglyrp1	3.7e-07	214	132	0.506	0.43	1.1e-05	0.08109	0.7	UP
Selplg	Selplg	6.5e-29	785	485	0.903	0.82	2.1e-26	0.08189	0.69	UP
Crip1	Crip1	6.7e-29	2061	1280	0.963	0.89	2.1e-26	0.07261	0.69	UP
Rap1b	Rap1b	1.2e-15	457	285	0.782	0.71	1.5e-13	0.07591	0.68	UP
Vim	Vim	4.8e-14	758	472	0.739	0.63	4.9e-12	0.10782	0.68	UP
2010111I01Rik	2010111I01Rik	0.0015	79	50	0.28	0.22	0.013	0.05601	0.67	UP
R3hdm4	R3hdm4	0.0059	99	62	0.325	0.29	0.038	0.03762	0.67	UP
Mxd4	Mxd4	6e-05	158	100	0.422	0.35	0.00093	0.07081	0.66	UP
Elf4	Elf4	0.00083	112	71	0.37	0.32	0.0082	0.04971	0.66	UP
Laptm5	Laptm5	3.1e-36	1125	719	0.963	0.93	2e-33	0.03109	0.65	UP
Emp3	Emp3	2.8e-22	715	455	0.893	0.78	5.1e-20	0.11506	0.65	UP
Smpdl3a	Smpdl3a	9.4e-05	147	93	0.409	0.35	0.0014	0.06418	0.65	UP
Klf2	Klf2	2.3e-17	1004	646	0.864	0.81	3.1e-15	0.05533	0.64	UP
Rasgrp2	Rasgrp2	2.2e-11	382	246	0.705	0.62	1.4e-09	0.08779	0.64	UP
Btg2	Btg2	5.9e-10	356	228	0.68	0.59	3.1e-08	0.09083	0.64	UP
Ppp1r18	Ppp1r18	2.2e-09	318	204	0.658	0.62	1e-07	0.0417	0.64	UP
Grap	Grap	5.1e-08	190	122	0.524	0.43	1.8e-06	0.09583	0.64	UP
Rinl	Rinl	2.6e-12	379	245	0.734	0.67	1.9e-10	0.0666	0.63	UP
Nfatc3	Nfatc3	2.9e-05	210	136	0.526	0.48	0.0005	0.04471	0.63	UP
Sh2d1a	Sh2d1a	0.00016	214	139	0.491	0.45	0.0021	0.04518	0.63	UP
Fryl	Fryl	0.00042	169	109	0.459	0.42	0.0047	0.03499	0.63	UP
Abracl	Abracl	6.1e-15	512	334	0.794	0.74	6.8e-13	0.05416	0.62	UP
9930111J21Rik2	9930111J21Rik2	1.6e-06	262	170	0.571	0.51	3.8e-05	0.05627	0.62	UP
Gabarapl2	Gabarapl2	8.6e-06	202	132	0.526	0.48	0.00017	0.04366	0.62	UP
Zdhhc18	Zdhhc18	0.00029	170	111	0.467	0.43	0.0035	0.04086	0.62	UP
H2-Q7	H2-Q7	2.9e-28	1549	1018	0.98	0.96	8.8e-26	0.02376	0.61	UP
Ccdc88c	Ccdc88c	2.9e-06	256	167	0.586	0.54	6.6e-05	0.05014	0.61	UP
Klrc1	Klrc1	0.0024	105	69	0.226	0.17	0.019	0.05765	0.61	UP
Ms4a6b	Ms4a6b	2e-20	920	607	0.903	0.86	3.1e-18	0.0388	0.6	UP
H2-T23	H2-T23	6.3e-12	390	257	0.732	0.67	4.4e-10	0.05729	0.6	UP
Samhd1	Samhd1	2.7e-09	414	273	0.692	0.62	1.3e-07	0.06856	0.6	UP
Efhd2	Efhd2	4e-07	180	119	0.519	0.42	1.1e-05	0.09927	0.6	UP
Ypel3	Ypel3	9.3e-06	210	139	0.514	0.45	0.00018	0.06383	0.6	UP
Slco3a1	Slco3a1	0.0018	149	99	0.397	0.35	0.015	0.04757	0.6	UP
Crebrf	Crebrf	0.0045	104	69	0.303	0.25	0.031	0.0526	0.6	UP
Ms4a4b	Ms4a4b	8e-32	2217	1477	0.985	0.97	3.4e-29	0.01979	0.59	UP
1810058I24Rik	1810058I24Rik	0.00018	184	122	0.494	0.46	0.0024	0.03189	0.59	UP
Dennd1c	Dennd1c	0.0011	95	63	0.345	0.29	0.01	0.05852	0.59	UP
Slfn2	Slfn2	9e-14	466	312	0.759	0.68	8.7e-12	0.0746	0.58	UP
Tap1	Tap1	4.2e-07	264	177	0.613	0.56	1.2e-05	0.05694	0.58	UP
Sorl1	Sorl1	0.00036	136	91	0.422	0.36	0.0042	0.06135	0.57	UP
Vamp8	Vamp8	0.00055	185	124	0.476	0.44	0.0058	0.03344	0.57	UP
Tspo	Tspo	1.1e-09	457	309	0.739	0.71	5.5e-08	0.03425	0.56	UP
Plec	Plec	3e-05	230	156	0.548	0.49	0.00051	0.0539	0.56	UP
Tacc1	Tacc1	0.00068	209	142	0.521	0.5	0.0069	0.0182	0.56	UP
Tpst2	Tpst2	0.00084	184	125	0.486	0.47	0.0083	0.01814	0.56	UP
Prrc2b	Prrc2b	0.0041	164	112	0.454	0.44	0.028	0.01269	0.56	UP
Flna	Flna	6.6e-09	317	216	0.655	0.59	2.8e-07	0.06024	0.55	UP
Irf2	Irf2	6.5e-06	244	166	0.586	0.55	0.00014	0.03858	0.55	UP
Gtf2i	Gtf2i	0.00025	231	158	0.541	0.52	0.003	0.02071	0.55	UP
Glipr2	Glipr2	0.0019	140	96	0.432	0.39	0.016	0.0387	0.55	UP
Rac2	Rac2	2.8e-29	1376	947	0.96	0.94	9.5e-27	0.02073	0.54	UP
Thy1	Thy1	5e-13	668	460	0.826	0.76	4.4e-11	0.06803	0.54	UP
Atox1	Atox1	1.5e-06	229	157	0.598	0.54	3.8e-05	0.05466	0.54	UP
Reep5	Reep5	3.1e-06	245	168	0.563	0.49	7e-05	0.06879	0.54	UP
Gbp7	Gbp7	0.00029	166	114	0.459	0.4	0.0034	0.05601	0.54	UP
Slfn1	Slfn1	0.0043	138	95	0.372	0.33	0.03	0.04483	0.54	UP
Lat	Lat	6.6e-13	458	316	0.784	0.7	5.6e-11	0.08522	0.53	UP
H2-Q6	H2-Q6	8.6e-09	384	267	0.705	0.66	3.6e-07	0.04155	0.53	UP
Tmem50a	Tmem50a	1.2e-08	322	223	0.71	0.66	4.6e-07	0.04809	0.53	UP
Apbb1ip	Apbb1ip	3.5e-06	360	249	0.682	0.68	8e-05	0.00503	0.53	UP
Ptms	Ptms	1.4e-05	120	83	0.355	0.26	0.00027	0.09735	0.53	UP
Neat1	Neat1	0.00013	240	166	0.538	0.49	0.0018	0.05134	0.53	UP
Znrf2	Znrf2	0.00048	184	127	0.491	0.46	0.0053	0.02994	0.53	UP
Trim30a	Trim30a	0.0062	169	117	0.432	0.41	0.04	0.02504	0.53	UP
Sub1	Sub1	7.1e-13	908	635	0.868	0.85	6e-11	0.01615	0.52	UP
Cd82	Cd82	0.00076	186	130	0.479	0.44	0.0077	0.04381	0.52	UP
Sp100	Sp100	2e-12	583	409	0.829	0.8	1.6e-10	0.02584	0.51	UP
Tbc1d10c	Tbc1d10c	1.3e-07	284	200	0.653	0.63	4.1e-06	0.02675	0.51	UP
Ctla2a	Ctla2a	0.0001	385	270	0.519	0.42	0.0014	0.09717	0.51	UP
Gm26740	Gm26740	0.00012	191	135	0.514	0.46	0.0017	0.05437	0.51	UP
Selenok	Selenok	0.00014	187	132	0.536	0.5	0.0019	0.03467	0.51	UP
Ifi206	Ifi206	0.00031	160	112	0.449	0.39	0.0036	0.05975	0.51	UP
Supt4a	Supt4a	1.8e-08	324	228	0.7	0.65	6.9e-07	0.0513	0.5	UP
Cd28	Cd28	6.3e-05	230	162	0.546	0.49	0.00098	0.05931	0.5	UP
Ifi209	Ifi209	0.00012	198	140	0.509	0.46	0.0016	0.04836	0.5	UP
Bnip3l	Bnip3l	0.00091	179	126	0.486	0.46	0.0087	0.02865	0.5	UP
Gmfg	Gmfg	1.1e-12	568	405	0.854	0.79	9e-11	0.06064	0.49	UP
Dock2	Dock2	1e-10	488	348	0.797	0.76	6.1e-09	0.03615	0.49	UP
Ankrd12	Ankrd12	1.1e-06	281	199	0.613	0.55	2.8e-05	0.06219	0.49	UP
Ly6c2	Ly6c2	8.2e-06	856	608	0.618	0.52	0.00016	0.09343	0.49	UP
Pla2g16	Pla2g16	0.00085	188	133	0.499	0.47	0.0083	0.0274	0.49	UP
Mrps16	Mrps16	0.001	216	154	0.536	0.53	0.0098	0.00576	0.49	UP
Gimap1	Gimap1	5.1e-09	435	313	0.777	0.74	2.3e-07	0.03574	0.48	UP
Ccdc12	Ccdc12	6.5e-06	234	168	0.618	0.57	0.00013	0.05034	0.48	UP
Parp14	Parp14	0.004	127	91	0.39	0.35	0.028	0.03803	0.48	UP
Arl6ip5	Arl6ip5	0.007	144	104	0.444	0.42	0.043	0.02378	0.48	UP
Ripor2	Ripor2	1.8e-06	355	257	0.667	0.64	4.4e-05	0.02955	0.47	UP
Itgb7	Itgb7	7e-05	330	239	0.633	0.61	0.0011	0.02477	0.47	UP
Themis	Themis	0.00051	193	140	0.479	0.43	0.0055	0.04906	0.47	UP
Gimap5	Gimap5	0.00054	247	178	0.591	0.57	0.0058	0.02042	0.47	UP
Cyth4	Cyth4	0.0017	195	140	0.506	0.48	0.014	0.02696	0.47	UP
Map1lc3b	Map1lc3b	0.0032	242	174	0.556	0.57	0.024	-0.01432	0.47	UP
Cdc42se1	Cdc42se1	0.007	203	146	0.516	0.52	0.044	-0.002	0.47	UP
H2-D1	H2-D1	9.3e-31	2344	1710	0.998	0.98	3.5e-28	0.01433	0.46	UP
Arpc1b	Arpc1b	1.1e-15	755	549	0.908	0.88	1.3e-13	0.02905	0.46	UP
Cdc42	Cdc42	1.9e-12	736	535	0.876	0.86	1.5e-10	0.01256	0.46	UP
Ifi203	Ifi203	6.5e-09	449	326	0.742	0.71	2.8e-07	0.03253	0.46	UP
Cd2	Cd2	1.1e-08	462	336	0.777	0.75	4.5e-07	0.03048	0.46	UP
Akna	Akna	0.0027	183	133	0.504	0.49	0.021	0.01239	0.46	UP
Tes	Tes	0.0051	137	99	0.437	0.4	0.034	0.03525	0.46	UP
Gimap4	Gimap4	2.8e-13	753	552	0.878	0.83	2.5e-11	0.05287	0.45	UP
Cyba	Cyba	1.3e-12	793	579	0.898	0.86	1e-10	0.04067	0.45	UP
Bcl11b	Bcl11b	3.1e-08	382	279	0.737	0.65	1.1e-06	0.08274	0.45	UP
Mndal	Mndal	3.7e-07	415	304	0.73	0.7	1.1e-05	0.02958	0.45	UP
Ostf1	Ostf1	1.1e-06	301	221	0.68	0.66	2.8e-05	0.02252	0.45	UP
Cox17	Cox17	0.00059	253	185	0.588	0.58	0.0062	0.01216	0.45	UP
Cd52	Cd52	8.1e-26	3370	2483	1	0.98	1.9e-23	0.01682	0.44	UP
Itm2b	Itm2b	2.4e-12	758	559	0.878	0.87	1.8e-10	0.01083	0.44	UP
Epsti1	Epsti1	7e-08	496	365	0.779	0.74	2.4e-06	0.0398	0.44	UP
Ctsw	Ctsw	2.2e-06	336	248	0.672	0.59	5.2e-05	0.08391	0.44	UP
Zfp36l2	Zfp36l2	0.0002	500	368	0.737	0.74	0.0026	-0.00396	0.44	UP
Mbd2	Mbd2	0.0035	255	188	0.598	0.6	0.026	-0.00209	0.44	UP
Txnip	Txnip	0.0008	332	247	0.635	0.61	0.008	0.02357	0.43	UP
Fnbp1	Fnbp1	0.0042	224	166	0.551	0.56	0.029	-0.0051	0.43	UP
Ube2h	Ube2h	0.0059	160	119	0.469	0.45	0.038	0.02337	0.42	UP
Sh3bgrl3	Sh3bgrl3	6.8e-14	1189	897	0.935	0.93	6.7e-12	0.00958	0.41	UP
Gimap3	Gimap3	6.2e-11	606	456	0.849	0.83	3.8e-09	0.02257	0.41	UP
Psmb9	Psmb9	5.8e-05	305	229	0.66	0.63	0.00091	0.02736	0.41	UP
Kif21b	Kif21b	0.0013	177	133	0.501	0.46	0.012	0.03829	0.41	UP
Fxyd5	Fxyd5	4.4e-12	812	616	0.906	0.9	3.2e-10	0.00502	0.4	UP
Rsrp1	Rsrp1	4.3e-08	477	360	0.809	0.79	1.5e-06	0.0144	0.4	UP
Gpsm3	Gpsm3	0.0019	216	164	0.573	0.56	0.016	0.01251	0.4	UP
Leprotl1	Leprotl1	0.0048	231	176	0.576	0.58	0.032	-0.00813	0.4	UP
H2-K1	H2-K1	3.8e-27	3279	2495	1	1	1.1e-24	0.00315	0.39	UP
Ucp2	Ucp2	2.8e-05	451	344	0.754	0.76	0.00048	-0.00078	0.39	UP
Ankrd44	Ankrd44	3.1e-05	339	258	0.685	0.67	0.00052	0.01172	0.39	UP
Kmt2e	Kmt2e	0.00087	303	231	0.643	0.65	0.0085	-0.00524	0.39	UP
Tmem71	Tmem71	0.004	139	106	0.417	0.37	0.028	0.05061	0.39	UP
Myl6	Myl6	1.2e-14	1428	1098	0.965	0.96	1.3e-12	0.00625	0.38	UP
Srgn	Srgn	5.1e-12	624	479	0.859	0.82	3.6e-10	0.04301	0.38	UP
Trbc2	Trbc2	3.8e-11	1839	1418	0.963	0.94	2.4e-09	0.02374	0.38	UP
Txn1	Txn1	1.3e-05	392	302	0.707	0.63	0.00024	0.07819	0.38	UP
Bin2	Bin2	1.7e-05	326	251	0.715	0.69	0.0003	0.02783	0.38	UP
Ogt	Ogt	2.1e-05	363	279	0.727	0.7	0.00038	0.02552	0.38	UP
Lrrfip1	Lrrfip1	0.00096	237	182	0.598	0.59	0.0091	0.00684	0.38	UP
Tmsb4x	Tmsb4x	2.6e-30	16348	12669	1	1	9.4e-28		0.37	UP
Cd3e	Cd3e	6.2e-09	643	496	0.851	0.82	2.7e-07	0.03241	0.37	UP
Myl12a	Myl12a	2.7e-05	436	338	0.739	0.74	0.00047	-0.00253	0.37	UP
Iqgap1	Iqgap1	5.5e-05	402	310	0.72	0.73	0.00087	-0.00714	0.37	UP
Cd37	Cd37	0.0011	293	227	0.645	0.64	0.01	0.00459	0.37	UP
Malat1	Malat1	2.7e-13	32156	25031	1	1	2.4e-11	0.0021	0.36	UP
Arpc2	Arpc2	1.3e-11	803	627	0.906	0.89	9e-10	0.0108	0.36	UP
Lck	Lck	1.6e-09	681	532	0.898	0.9	7.9e-08	0.00178	0.36	UP
Ptpn22	Ptpn22	0.00011	273	213	0.653	0.61	0.0016	0.03779	0.36	UP
Tmem234	Tmem234	0.0013	251	195	0.615	0.62	0.012	-0.00574	0.36	UP
Capns1	Capns1	0.007	192	149	0.538	0.53	0.044	0.0114	0.36	UP
Arhgdib	Arhgdib	2.6e-15	1286	1009	0.96	0.95	3e-13	0.00812	0.35	UP
Actg1	Actg1	1.1e-09	2646	2076	0.975	0.97	5.3e-08	0.00672	0.35	UP
Fyb	Fyb	1.2e-05	490	385	0.784	0.79	0.00022	-0.00464	0.35	UP
Cd3d	Cd3d	7.5e-10	1097	865	0.938	0.91	3.9e-08	0.02887	0.34	UP
Myl12b	Myl12b	7.5e-07	478	377	0.806	0.79	2e-05	0.01244	0.34	UP
Ubc	Ubc	0.00023	442	349	0.739	0.75	0.0029	-0.01462	0.34	UP
Runx3	Runx3	0.0023	296	233	0.628	0.61	0.019	0.01875	0.34	UP
Gm2682	Gm2682	0.0046	322	255	0.615	0.6	0.031	0.0116	0.34	UP
Atp6v0e	Atp6v0e	0.0059	238	188	0.613	0.61	0.038	-0.00086	0.34	UP
Aes	Aes	5.2e-09	646	514	0.896	0.87	2.3e-07	0.02558	0.33	UP
Ppp1ca	Ppp1ca	1.9e-05	528	421	0.824	0.81	0.00034	0.01615	0.33	UP
Grk2	Grk2	0.00074	244	194	0.62	0.6	0.0075	0.02497	0.33	UP
Psmb10	Psmb10	0.0073	251	200	0.613	0.61	0.045	0.00702	0.33	UP
Actb	Actb	6.2e-17	10635	8529	1	1	8.2e-15		0.32	UP
H3f3b	H3f3b	2.2e-09	1123	902	0.948	0.93	1e-07	0.01936	0.32	UP
Sept1	Sept1	8.2e-06	480	386	0.834	0.81	0.00016	0.0266	0.32	UP
Gabarap	Gabarap	0.0015	277	222	0.655	0.67	0.013	-0.01964	0.32	UP
Cd3g	Cd3g	9.6e-09	952	768	0.953	0.89	3.9e-07	0.06005	0.31	UP
Ptpn18	Ptpn18	4.6e-07	858	690	0.931	0.92	1.3e-05	0.0125	0.31	UP
Ptprcap	Ptprcap	7.5e-07	870	702	0.913	0.92	2e-05	-0.00592	0.31	UP
Atp5h	Atp5h	5e-06	797	645	0.918	0.91	0.00011	0.0064	0.31	UP
Arpc5	Arpc5	0.00019	413	334	0.717	0.73	0.0025	-0.01698	0.31	UP
Arhgap30	Arhgap30	0.0013	360	290	0.71	0.71	0.012	-0.00393	0.31	UP
B2m	B2m	2.1e-15	2379	1933	0.988	0.99	2.4e-13	-0.00347	0.3	UP
Calm1	Calm1	2.4e-08	1242	1010	0.953	0.95	9e-07	0.0075	0.3	UP
Pfdn5	Pfdn5	1.5e-06	689	558	0.888	0.9	3.8e-05	-0.01655	0.3	UP
Arhgap45	Arhgap45	6.2e-05	400	324	0.779	0.77	0.00096	0.00827	0.3	UP
Ndufa13	Ndufa13	0.00014	448	365	0.799	0.79	0.0019	0.005	0.3	UP
Psmb3	Psmb3	0.0013	334	271	0.71	0.71	0.012	-0.00131	0.3	UP
Vasp	Vasp	0.00089	302	247	0.68	0.68	0.0086	0.00097	0.29	UP
Wnk1	Wnk1	0.0043	325	266	0.672	0.7	0.03	-0.02381	0.29	UP
Coro1a	Coro1a	1e-10	1712	1407	0.963	0.97	5.9e-09	-0.00779	0.28	UP
Cox6b1	Cox6b1	0.00057	421	347	0.767	0.76	0.006	0.00742	0.28	UP
Selenow	Selenow	0.0015	400	331	0.749	0.77	0.013	-0.01888	0.27	UP
Ubb	Ubb	8.7e-12	1910	1593	0.993	0.98	6.1e-10	0.00885	0.26	UP
Mbnl1	Mbnl1	2.9e-06	1036	862	0.921	0.93	6.7e-05	-0.00899	0.26	UP
Clic1	Clic1	3e-06	641	536	0.876	0.85	6.8e-05	0.02885	0.26	UP
Jak1	Jak1	0.0001	671	560	0.866	0.88	0.0015	-0.01681	0.26	UP
Ankrd11	Ankrd11	0.00027	608	509	0.839	0.86	0.0033	-0.01836	0.26	UP
Msn	Msn	0.0015	495	414	0.804	0.82	0.013	-0.01999	0.26	UP
Psmb1	Psmb1	0.0034	422	352	0.769	0.78	0.025	-0.01217	0.26	UP
Atp1b3	Atp1b3	0.0053	420	351	0.71	0.76	0.035	-0.04755	0.26	UP
Rpl37a	Rpl37a	7.1e-12	4628	5518	0.998	1	5e-10	-0.0009	-0.25	DOWN
Tra2a	Tra2a	0.00017	144	172	0.395	0.55	0.0022	-0.15091	-0.25	DOWN
Bola2	Bola2	0.00031	190	227	0.516	0.64	0.0037	-0.12707	-0.25	DOWN
Numa1	Numa1	0.00033	112	134	0.34	0.48	0.0038	-0.13772	-0.25	DOWN
Erap1	Erap1	0.0012	48	58	0.176	0.27	0.011	-0.09024	-0.25	DOWN
Polr2l	Polr2l	0.0027	35	42	0.156	0.23	0.021	-0.07699	-0.25	DOWN
Sptssa	Sptssa	0.0037	67	80	0.261	0.36	0.027	-0.09889	-0.25	DOWN
Dnm1l	Dnm1l	0.0063	45	53	0.181	0.26	0.04	-0.0774	-0.25	DOWN
Canx	Canx	0.0082	107	127	0.367	0.47	0.049	-0.09939	-0.25	DOWN
Rpl36	Rpl36	1.2e-13	2807	3370	1	1	1.1e-11	0.00158	-0.26	DOWN
Tmsb10	Tmsb10	4.5e-13	3160	3778	0.995	1	4e-11	-0.00339	-0.26	DOWN
Rpl37	Rpl37	1.3e-12	3508	4207	0.988	1	1e-10	-0.00925	-0.26	DOWN
mt-Nd3	mt-Nd3	5.9e-07	823	987	0.859	0.93	1.6e-05	-0.07418	-0.26	DOWN
Tpr	Tpr	3.1e-05	339	408	0.672	0.79	0.00053	-0.12208	-0.26	DOWN
Ilf2	Ilf2	7.6e-05	59	71	0.206	0.33	0.0012	-0.12195	-0.26	DOWN
U2surp	U2surp	0.00023	98	117	0.325	0.45	0.0029	-0.12423	-0.26	DOWN
Eif5b	Eif5b	0.00057	182	218	0.467	0.6	0.006	-0.13413	-0.26	DOWN
Crnkl1	Crnkl1	0.00072	37	44	0.139	0.22	0.0073	-0.08542	-0.26	DOWN
Sfxn1	Sfxn1	0.00082	58	69	0.208	0.3	0.0081	-0.09477	-0.26	DOWN
Cirbp	Cirbp	0.00086	57	69	0.203	0.3	0.0084	-0.09868	-0.26	DOWN
Cnpy2	Cnpy2	0.0011	31	37	0.122	0.2	0.0099	-0.07862	-0.26	DOWN
Lars	Lars	0.0012	36	43	0.139	0.22	0.011	-0.08175	-0.26	DOWN
Mrps9	Mrps9	0.0034	45	54	0.189	0.27	0.025	-0.08572	-0.26	DOWN
Smad7	Smad7	0.004	111	133	0.328	0.43	0.028	-0.1023	-0.26	DOWN
Nrip1	Nrip1	0.004	82	98	0.256	0.34	0.028	-0.08914	-0.26	DOWN
Pdhb	Pdhb	0.0043	52	62	0.221	0.31	0.03	-0.08762	-0.26	DOWN
Rbm34	Rbm34	0.0048	40	47	0.156	0.23	0.033	-0.07121	-0.26	DOWN
Rpl6	Rpl6	4.1e-15	2671	3216	0.993	1	4.6e-13	-0.00429	-0.27	DOWN
Rps15a	Rps15a	7.2e-15	4704	5661	0.995	1	8.1e-13	-0.00286	-0.27	DOWN
Rpl32	Rpl32	1.3e-14	4769	5763	1	1	1.4e-12		-0.27	DOWN
Tufm	Tufm	0.0001	34	41	0.124	0.22	0.0015	-0.09401	-0.27	DOWN
Nudt5	Nudt5	0.00014	33	40	0.124	0.22	0.0019	-0.09611	-0.27	DOWN
Eif1ax	Eif1ax	0.00023	74	89	0.258	0.37	0.0029	-0.11661	-0.27	DOWN
Fam133b	Fam133b	0.00032	61	74	0.206	0.32	0.0037	-0.11091	-0.27	DOWN
Eif2s2	Eif2s2	0.00033	257	310	0.605	0.72	0.0038	-0.10973	-0.27	DOWN
Eif3a	Eif3a	0.00035	266	321	0.62	0.73	0.004	-0.11323	-0.27	DOWN
Erg28	Erg28	0.00038	41	50	0.159	0.26	0.0043	-0.09658	-0.27	DOWN
Tomm5	Tomm5	0.00043	87	105	0.313	0.43	0.0048	-0.12087	-0.27	DOWN
Zranb2	Zranb2	0.00043	75	90	0.268	0.39	0.0048	-0.11982	-0.27	DOWN
Ccnh	Ccnh	0.00048	31	37	0.117	0.2	0.0053	-0.08411	-0.27	DOWN
Ptges3	Ptges3	0.00056	88	106	0.298	0.42	0.006	-0.12105	-0.27	DOWN
Cbx3	Cbx3	0.00068	174	209	0.489	0.6	0.007	-0.11232	-0.27	DOWN
Rbm38	Rbm38	0.00076	56	68	0.216	0.32	0.0077	-0.10519	-0.27	DOWN
Dnaja1	Dnaja1	0.00085	284	342	0.64	0.74	0.0083	-0.10389	-0.27	DOWN
Prdx3	Prdx3	0.0014	38	46	0.154	0.24	0.012	-0.08525	-0.27	DOWN
Aven	Aven	0.0015	35	42	0.129	0.21	0.013	-0.07748	-0.27	DOWN
Mrps34	Mrps34	0.0019	49	59	0.194	0.28	0.016	-0.08759	-0.27	DOWN
Cep57	Cep57	0.0028	34	41	0.141	0.22	0.022	-0.07454	-0.27	DOWN
Rsl24d1	Rsl24d1	0.0032	42	51	0.169	0.25	0.024	-0.08192	-0.27	DOWN
Rpl27a	Rpl27a	1.4e-16	4078	4943	1	1	1.8e-14		-0.28	DOWN
mt-Nd1	mt-Nd1	1.4e-12	1746	2121	0.975	0.99	1.2e-10	-0.01483	-0.28	DOWN
Snrpd3	Snrpd3	3.6e-05	148	180	0.427	0.58	0.0006	-0.15281	-0.28	DOWN
Hnrnpa3	Hnrnpa3	0.00025	371	449	0.73	0.81	0.003	-0.08235	-0.28	DOWN
Snrpd2	Snrpd2	0.00025	202	246	0.558	0.67	0.003	-0.11641	-0.28	DOWN
Me2	Me2	0.00026	48	58	0.179	0.28	0.0032	-0.10353	-0.28	DOWN
Hpf1	Hpf1	0.00031	61	75	0.211	0.32	0.0037	-0.107	-0.28	DOWN
Strap	Strap	0.00035	52	62	0.196	0.3	0.0041	-0.10245	-0.28	DOWN
Casp8ap2	Casp8ap2	0.00043	63	76	0.213	0.32	0.0048	-0.10872	-0.28	DOWN
Il21r	Il21r	0.00051	61	75	0.226	0.33	0.0055	-0.10683	-0.28	DOWN
Uri1	Uri1	0.00054	48	58	0.169	0.27	0.0057	-0.09926	-0.28	DOWN
Fmc1	Fmc1	0.00087	34	41	0.132	0.21	0.0084	-0.08341	-0.28	DOWN
Pdap1	Pdap1	0.0026	123	150	0.382	0.48	0.02	-0.10236	-0.28	DOWN
Anapc1	Anapc1	0.0028	35	43	0.149	0.23	0.022	-0.07708	-0.28	DOWN
Srsf9	Srsf9	0.0034	44	53	0.194	0.27	0.025	-0.08023	-0.28	DOWN
Eef1a1	Eef1a1	6.6e-26	5273	6462	1	1	1.5e-23		-0.29	DOWN
Rps3	Rps3	8e-19	3283	4028	0.995	1	1.2e-16	-0.00339	-0.29	DOWN
Rplp0	Rplp0	2.6e-16	3909	4787	0.998	1	3.4e-14	-0.00143	-0.29	DOWN
Rps21	Rps21	3.5e-12	4408	5388	0.998	1	2.6e-10	-0.00196	-0.29	DOWN
Ighm	Ighm	1.6e-09	241	295	0.409	0.6	7.9e-08	-0.19541	-0.29	DOWN
Osgep	Osgep	0.0001	32	39	0.117	0.21	0.0014	-0.09304	-0.29	DOWN
Rexo2	Rexo2	0.00013	98	119	0.337	0.47	0.0017	-0.12759	-0.29	DOWN
Ccar1	Ccar1	0.00016	98	120	0.328	0.45	0.0022	-0.12595	-0.29	DOWN
Supt16	Supt16	0.00033	101	123	0.352	0.47	0.0038	-0.1169	-0.29	DOWN
Rangap1	Rangap1	0.00042	70	86	0.238	0.35	0.0047	-0.11229	-0.29	DOWN
Stub1	Stub1	0.00049	55	68	0.199	0.3	0.0054	-0.10469	-0.29	DOWN
Psmb6	Psmb6	0.00052	115	141	0.392	0.52	0.0056	-0.1287	-0.29	DOWN
Zmiz2	Zmiz2	0.00084	41	50	0.159	0.25	0.0083	-0.08764	-0.29	DOWN
Brix1	Brix1	0.00085	41	50	0.169	0.26	0.0083	-0.09086	-0.29	DOWN
Rfc2	Rfc2	0.00091	49	59	0.184	0.28	0.0087	-0.09383	-0.29	DOWN
Zmynd8	Zmynd8	0.0012	65	79	0.233	0.34	0.011	-0.10201	-0.29	DOWN
Hnrnph3	Hnrnph3	0.0018	34	42	0.127	0.2	0.015	-0.07524	-0.29	DOWN
Vdac1	Vdac1	0.0018	55	68	0.226	0.32	0.015	-0.09474	-0.29	DOWN
Pum3	Pum3	0.002	44	54	0.169	0.25	0.016	-0.08087	-0.29	DOWN
Zfp593	Zfp593	0.0021	31	38	0.127	0.2	0.017	-0.07366	-0.29	DOWN
Metap2	Metap2	0.0038	124	151	0.419	0.52	0.027	-0.09772	-0.29	DOWN
Dnmt1	Dnmt1	0.0042	89	108	0.293	0.38	0.029	-0.09028	-0.29	DOWN
Itpr3	Itpr3	0.0069	38	46	0.151	0.22	0.043	-0.06934	-0.29	DOWN
Rpl41	Rpl41	5.6e-19	4134	5078	1	1	8.2e-17	0.00053	-0.3	DOWN
Prdx6	Prdx6	1.2e-05	109	135	0.335	0.49	0.00023	-0.15739	-0.3	DOWN
Lsm3	Lsm3	5.4e-05	63	77	0.226	0.35	0.00085	-0.12312	-0.3	DOWN
Slc25a5	Slc25a5	6.7e-05	320	395	0.675	0.77	0.001	-0.09595	-0.3	DOWN
Tardbp	Tardbp	8.2e-05	103	127	0.333	0.48	0.0012	-0.14411	-0.3	DOWN
Phb2	Phb2	0.00018	117	143	0.39	0.51	0.0024	-0.12277	-0.3	DOWN
Swi5	Swi5	0.00026	112	137	0.385	0.51	0.0032	-0.12668	-0.3	DOWN
Zpr1	Zpr1	0.0006	33	41	0.129	0.21	0.0063	-0.08484	-0.3	DOWN
Dcps	Dcps	0.00062	35	43	0.149	0.24	0.0065	-0.09021	-0.3	DOWN
Erh	Erh	0.00071	56	69	0.211	0.31	0.0072	-0.1007	-0.3	DOWN
Srsf4	Srsf4	0.00099	37	45	0.154	0.24	0.0094	-0.08683	-0.3	DOWN
Ncbp3	Ncbp3	0.0011	44	55	0.164	0.25	0.01	-0.08794	-0.3	DOWN
Txn2	Txn2	0.0011	72	89	0.278	0.38	0.011	-0.10621	-0.3	DOWN
Nae1	Nae1	0.0012	37	46	0.149	0.23	0.011	-0.08496	-0.3	DOWN
Acbd6	Acbd6	0.0013	47	58	0.201	0.29	0.012	-0.09381	-0.3	DOWN
Samd3	Samd3	0.0013	40	49	0.127	0.2	0.012	-0.07576	-0.3	DOWN
Dnmt3a	Dnmt3a	0.0021	42	52	0.151	0.23	0.017	-0.07932	-0.3	DOWN
Sdhc	Sdhc	0.0071	33	41	0.161	0.23	0.044	-0.06887	-0.3	DOWN
Lta4h	Lta4h	8.4e-05	66	82	0.223	0.35	0.0012	-0.12402	-0.31	DOWN
Snrpa1	Snrpa1	0.00014	57	71	0.213	0.33	0.002	-0.11503	-0.31	DOWN
Cux1	Cux1	0.00016	46	57	0.159	0.26	0.0021	-0.10078	-0.31	DOWN
Cops4	Cops4	0.00019	36	45	0.139	0.23	0.0025	-0.09488	-0.31	DOWN
Qk	Qk	0.00026	34	42	0.122	0.21	0.0032	-0.08598	-0.31	DOWN
Smarcb1	Smarcb1	0.00036	38	48	0.161	0.26	0.0041	-0.0983	-0.31	DOWN
Eif2s1	Eif2s1	0.00061	77	96	0.3	0.41	0.0064	-0.10858	-0.31	DOWN
Smim4	Smim4	0.00087	42	52	0.166	0.26	0.0085	-0.09281	-0.31	DOWN
U2af1	U2af1	0.00092	93	115	0.335	0.45	0.0088	-0.11693	-0.31	DOWN
Tceal9	Tceal9	0.0024	31	38	0.129	0.2	0.019	-0.07275	-0.31	DOWN
Tsix	Tsix	0.0057	53	65	0.206	0.28	0.037	-0.07886	-0.31	DOWN
Rps23	Rps23	1.8e-21	3335	4159	0.998	1	3.1e-19	-0.00196	-0.32	DOWN
Rps9	Rps9	3e-21	3229	4039	0.995	1	5.1e-19	-0.00391	-0.32	DOWN
Rpl22	Rpl22	1e-17	1661	2074	0.98	0.99	1.4e-15	-0.01144	-0.32	DOWN
Polr2e	Polr2e	9.9e-06	71	89	0.251	0.39	0.00019	-0.13719	-0.32	DOWN
Baz1b	Baz1b	1.2e-05	117	145	0.342	0.49	0.00022	-0.15047	-0.32	DOWN
Dnajc2	Dnajc2	1.9e-05	83	104	0.28	0.42	0.00034	-0.13947	-0.32	DOWN
Cbl	Cbl	2e-05	114	142	0.337	0.49	0.00035	-0.15491	-0.32	DOWN
Cct5	Cct5	2.4e-05	162	203	0.486	0.61	0.00042	-0.12164	-0.32	DOWN
Polr2f	Polr2f	2.5e-05	82	103	0.293	0.43	0.00043	-0.13442	-0.32	DOWN
Cisd2	Cisd2	2.6e-05	77	96	0.268	0.4	0.00045	-0.13296	-0.32	DOWN
Kmt5a	Kmt5a	2.8e-05	60	75	0.199	0.32	0.00048	-0.12466	-0.32	DOWN
Cdv3	Cdv3	5.4e-05	91	113	0.3	0.44	0.00086	-0.14431	-0.32	DOWN
Ivns1abp	Ivns1abp	5.5e-05	45	57	0.166	0.28	0.00086	-0.11225	-0.32	DOWN
Llph	Llph	0.00014	127	158	0.422	0.55	0.0019	-0.12782	-0.32	DOWN
Chchd1	Chchd1	0.00018	64	80	0.246	0.37	0.0023	-0.12218	-0.32	DOWN
Hspa5	Hspa5	0.00066	230	288	0.529	0.64	0.0068	-0.11624	-0.32	DOWN
Chd6	Chd6	0.00099	57	71	0.199	0.29	0.0094	-0.09366	-0.32	DOWN
Rpsa	Rpsa	8.6e-25	4955	6249	1	1	1.9e-22	0.00053	-0.33	DOWN
Rpl21	Rpl21	1e-20	3190	4013	0.993	1	1.7e-18	-0.00534	-0.33	DOWN
Rpl39	Rpl39	2.9e-17	4219	5299	0.995	1	3.9e-15	-0.00339	-0.33	DOWN
Rpl4	Rpl4	2.8e-16	1304	1639	0.96	0.98	3.5e-14	-0.02184	-0.33	DOWN
Ppia	Ppia	7.5e-12	1648	2072	0.983	0.99	5.2e-10	-0.00791	-0.33	DOWN
Mrps15	Mrps15	2.7e-05	53	66	0.203	0.33	0.00047	-0.12338	-0.33	DOWN
Mrpl15	Mrpl15	3e-05	61	77	0.218	0.34	0.00051	-0.12583	-0.33	DOWN
Naa10	Naa10	4e-05	63	80	0.236	0.36	0.00066	-0.12475	-0.33	DOWN
Tomm40	Tomm40	6.4e-05	46	57	0.164	0.28	0.00098	-0.11211	-0.33	DOWN
Emb	Emb	7.8e-05	252	316	0.481	0.63	0.0012	-0.14446	-0.33	DOWN
Hspa14	Hspa14	7.9e-05	45	57	0.174	0.29	0.0012	-0.11217	-0.33	DOWN
Pgp	Pgp	0.00012	36	45	0.132	0.22	0.0017	-0.09339	-0.33	DOWN
Rrp7a	Rrp7a	0.00023	28	36	0.117	0.2	0.0029	-0.08674	-0.33	DOWN
Eif1a	Eif1a	0.00033	42	54	0.154	0.25	0.0038	-0.09576	-0.33	DOWN
Anapc5	Anapc5	0.00042	94	119	0.33	0.45	0.0047	-0.11664	-0.33	DOWN
Csrp1	Csrp1	0.00059	32	40	0.127	0.21	0.0062	-0.08312	-0.33	DOWN
Gpr18	Gpr18	0.0006	41	52	0.154	0.24	0.0063	-0.08945	-0.33	DOWN
Cmah	Cmah	0.00097	129	162	0.36	0.47	0.0092	-0.10788	-0.33	DOWN
Tmem243	Tmem243	0.0016	43	54	0.184	0.27	0.014	-0.08858	-0.33	DOWN
Exosc10	Exosc10	0.0017	31	39	0.129	0.21	0.015	-0.07643	-0.33	DOWN
Gcn1l1	Gcn1l1	0.0028	39	49	0.164	0.24	0.022	-0.08005	-0.33	DOWN
Gm10076	Gm10076	9.6e-06	211	267	0.519	0.68	0.00019	-0.16137	-0.34	DOWN
Eif4g1	Eif4g1	1.5e-05	114	144	0.365	0.52	0.00028	-0.15179	-0.34	DOWN
Rex1bd	Rex1bd	7.7e-05	63	80	0.238	0.36	0.0012	-0.12174	-0.34	DOWN
Immt	Immt	9.2e-05	66	83	0.248	0.37	0.0013	-0.1218	-0.34	DOWN
Mrpl14	Mrpl14	0.00018	42	54	0.164	0.27	0.0023	-0.10212	-0.34	DOWN
Ugcg	Ugcg	0.00021	125	158	0.372	0.5	0.0027	-0.1249	-0.34	DOWN
Gm10073	Gm10073	0.00021	58	74	0.226	0.34	0.0027	-0.10945	-0.34	DOWN
Utp11	Utp11	0.00022	56	71	0.216	0.33	0.0028	-0.11097	-0.34	DOWN
Bcor	Bcor	0.00025	42	53	0.151	0.25	0.0031	-0.09877	-0.34	DOWN
Taf1	Taf1	0.002	41	52	0.159	0.24	0.016	-0.08344	-0.34	DOWN
Tsc22d3	Tsc22d3	0.0048	100	126	0.31	0.4	0.032	-0.0892	-0.34	DOWN
Rpl26	Rpl26	5e-20	2440	3106	0.995	1	7.6e-18	-0.00286	-0.35	DOWN
mt-Nd2	mt-Nd2	1.3e-15	1789	2277	0.975	0.99	1.5e-13	-0.01588	-0.35	DOWN
Ahsa1	Ahsa1	5.4e-06	55	70	0.196	0.33	0.00011	-0.13292	-0.35	DOWN
Mrpl42	Mrpl42	7.9e-06	63	81	0.238	0.37	0.00016	-0.13436	-0.35	DOWN
Nop10	Nop10	9.8e-06	177	226	0.509	0.64	0.00019	-0.13136	-0.35	DOWN
Gtpbp4	Gtpbp4	6.5e-05	74	94	0.248	0.37	0.00099	-0.12548	-0.35	DOWN
Magoh	Magoh	7.5e-05	85	108	0.3	0.42	0.0011	-0.12382	-0.35	DOWN
Pdha1	Pdha1	8.3e-05	45	58	0.174	0.28	0.0012	-0.11112	-0.35	DOWN
Rpn1	Rpn1	0.00011	54	68	0.208	0.32	0.0015	-0.11369	-0.35	DOWN
Hspa4	Hspa4	0.00012	86	110	0.3	0.43	0.0016	-0.1275	-0.35	DOWN
Glrx5	Glrx5	0.00014	66	84	0.238	0.36	0.0019	-0.11964	-0.35	DOWN
Cct4	Cct4	0.00015	116	147	0.395	0.53	0.002	-0.1383	-0.35	DOWN
Ybx1	Ybx1	0.00015	446	568	0.794	0.85	0.002	-0.05304	-0.35	DOWN
Msh2	Msh2	0.00038	37	48	0.144	0.24	0.0043	-0.09307	-0.35	DOWN
Pcm1	Pcm1	0.00042	65	83	0.226	0.33	0.0046	-0.10735	-0.35	DOWN
Rps6ka3	Rps6ka3	0.00046	55	70	0.208	0.31	0.005	-0.10107	-0.35	DOWN
Golgb1	Golgb1	0.0012	54	68	0.186	0.27	0.011	-0.08662	-0.35	DOWN
Rad21	Rad21	0.0013	83	105	0.28	0.38	0.012	-0.09953	-0.35	DOWN
Tcof1	Tcof1	4e-06	94	120	0.305	0.46	8.9e-05	-0.15144	-0.36	DOWN
Usp1	Usp1	1.5e-05	55	70	0.181	0.3	0.00028	-0.11891	-0.36	DOWN
Mia2	Mia2	2.7e-05	67	87	0.236	0.36	0.00046	-0.12528	-0.36	DOWN
Trim28	Trim28	3.5e-05	49	62	0.189	0.31	0.00058	-0.11935	-0.36	DOWN
Mphosph8	Mphosph8	3.6e-05	49	63	0.166	0.28	0.0006	-0.11488	-0.36	DOWN
Zfp106	Zfp106	0.00021	47	61	0.184	0.29	0.0027	-0.10382	-0.36	DOWN
Selenoh	Selenoh	0.00026	102	130	0.33	0.45	0.0031	-0.11611	-0.36	DOWN
Vrk1	Vrk1	0.001	32	41	0.141	0.22	0.0098	-0.08032	-0.36	DOWN
Ppm1b	Ppm1b	0.0024	40	51	0.164	0.24	0.019	-0.07953	-0.36	DOWN
Gramd4	Gramd4	0.0032	44	57	0.181	0.26	0.024	-0.0774	-0.36	DOWN
Rps15	Rps15	3.3e-23	2275	2933	0.993	1	6.2e-21	-0.00482	-0.37	DOWN
Rpl10a	Rpl10a	1.4e-20	1954	2521	0.983	0.99	2.2e-18	-0.01054	-0.37	DOWN
Pds5a	Pds5a	2.2e-06	89	115	0.28	0.43	5.2e-05	-0.14735	-0.37	DOWN
Taf1d	Taf1d	6.2e-06	151	195	0.422	0.57	0.00013	-0.14621	-0.37	DOWN
Exosc7	Exosc7	1.1e-05	43	55	0.164	0.28	0.00021	-0.11841	-0.37	DOWN
Tcf12	Tcf12	1.1e-05	80	103	0.258	0.4	0.00022	-0.14446	-0.37	DOWN
Lsm6	Lsm6	4.3e-05	89	114	0.318	0.45	0.0007	-0.12905	-0.37	DOWN
Mettl26	Mettl26	0.0001	33	42	0.129	0.22	0.0014	-0.09588	-0.37	DOWN
Cdk2ap1	Cdk2ap1	0.00016	46	60	0.176	0.28	0.0021	-0.10758	-0.37	DOWN
Ldha	Ldha	0.0003	252	326	0.6	0.7	0.0035	-0.10155	-0.37	DOWN
Cisd1	Cisd1	0.0013	31	40	0.134	0.21	0.011	-0.07778	-0.37	DOWN
Rps16	Rps16	2.3e-26	4800	6252	1	1	5.6e-24	0.00053	-0.38	DOWN
Rpl14	Rpl14	2.1e-22	1762	2289	0.988	0.99	3.9e-20	-0.004	-0.38	DOWN
Stip1	Stip1	1.8e-07	56	73	0.184	0.33	5.3e-06	-0.14743	-0.38	DOWN
Srsf3	Srsf3	1.3e-06	264	343	0.628	0.75	3.3e-05	-0.12103	-0.38	DOWN
Fubp1	Fubp1	2.2e-06	181	235	0.489	0.65	5.2e-05	-0.15751	-0.38	DOWN
Cops3	Cops3	7.9e-06	33	43	0.124	0.23	0.00016	-0.11082	-0.38	DOWN
Pdlim1	Pdlim1	2.1e-05	64	83	0.218	0.34	0.00038	-0.12583	-0.38	DOWN
Paics	Paics	4.1e-05	50	66	0.201	0.32	0.00068	-0.11798	-0.38	DOWN
Sumo3	Sumo3	6.3e-05	33	43	0.132	0.23	0.00097	-0.0997	-0.38	DOWN
Nsmce1	Nsmce1	8.7e-05	52	68	0.201	0.31	0.0013	-0.1101	-0.38	DOWN
Nfkb1	Nfkb1	0.00044	103	134	0.36	0.48	0.0049	-0.12312	-0.38	DOWN
Pigx	Pigx	0.00056	41	54	0.169	0.26	0.006	-0.09086	-0.38	DOWN
Eef1e1	Eef1e1	0.00085	29	38	0.124	0.2	0.0083	-0.07719	-0.38	DOWN
Tsc22d2	Tsc22d2	0.0024	31	41	0.132	0.2	0.019	-0.07237	-0.38	DOWN
Ckap5	Ckap5	0.0048	38	50	0.149	0.22	0.033	-0.06972	-0.38	DOWN
Rps5	Rps5	1.1e-23	3110	4067	0.99	1	2.1e-21	-0.0073	-0.39	DOWN
Chd4	Chd4	3.6e-08	231	303	0.538	0.7	1.3e-06	-0.16411	-0.39	DOWN
Hnrnpa1	Hnrnpa1	3.4e-06	192	251	0.524	0.65	7.7e-05	-0.13066	-0.39	DOWN
Cyc1	Cyc1	1.8e-05	71	94	0.273	0.41	0.00032	-0.13272	-0.39	DOWN
Hnrnpd	Hnrnpd	1.9e-05	162	212	0.484	0.61	0.00034	-0.12622	-0.39	DOWN
Ago2	Ago2	4.2e-05	97	127	0.33	0.47	0.00069	-0.13503	-0.39	DOWN
Prkag1	Prkag1	7.8e-05	41	54	0.161	0.26	0.0012	-0.1025	-0.39	DOWN
Dtymk	Dtymk	0.00017	39	51	0.146	0.24	0.0022	-0.09795	-0.39	DOWN
Zfpm1	Zfpm1	0.00018	41	53	0.149	0.25	0.0023	-0.09652	-0.39	DOWN
Tpd52l2	Tpd52l2	0.00021	31	41	0.124	0.21	0.0027	-0.09085	-0.39	DOWN
Ebna1bp2	Ebna1bp2	0.00026	55	72	0.223	0.33	0.0032	-0.10773	-0.39	DOWN
Spint2	Spint2	0.00043	31	40	0.129	0.21	0.0048	-0.08537	-0.39	DOWN
Fam46a	Fam46a	0.0012	55	72	0.176	0.26	0.011	-0.08656	-0.39	DOWN
Dap3	Dap3	0.0016	41	54	0.184	0.27	0.014	-0.08595	-0.39	DOWN
Rps4x	Rps4x	4.2e-27	2947	3897	0.995	1	1.1e-24	-0.00391	-0.4	DOWN
Rps24	Rps24	6.1e-27	6769	8919	1	1	1.6e-24		-0.4	DOWN
Rps7	Rps7	4.7e-25	3485	4601	1	1	1e-22	0.00053	-0.4	DOWN
Wdr89	Wdr89	2.6e-07	175	230	0.479	0.65	7.7e-06	-0.17112	-0.4	DOWN
Etf1	Etf1	2.6e-06	50	66	0.176	0.31	6.1e-05	-0.13806	-0.4	DOWN
Kpnb1	Kpnb1	4.1e-06	60	79	0.213	0.35	9e-05	-0.14025	-0.4	DOWN
Brd8	Brd8	1.7e-05	56	74	0.194	0.32	0.00031	-0.12174	-0.4	DOWN
Cops6	Cops6	4.8e-05	64	84	0.253	0.38	0.00076	-0.12998	-0.4	DOWN
Psme3	Psme3	6.2e-05	44	58	0.171	0.28	0.00097	-0.10834	-0.4	DOWN
Tnpo1	Tnpo1	0.0001	39	52	0.151	0.25	0.0014	-0.10034	-0.4	DOWN
Ube2e1	Ube2e1	0.00016	38	50	0.159	0.26	0.0021	-0.09815	-0.4	DOWN
Zmynd11	Zmynd11	0.00024	64	85	0.238	0.35	0.003	-0.11491	-0.4	DOWN
Rps27a	Rps27a	5.6e-31	3263	4328	0.995	1	2.1e-28	-0.00339	-0.41	DOWN
Rpl8	Rpl8	1.2e-27	2678	3555	0.995	1	3.4e-25	-0.00181	-0.41	DOWN
Rps6	Rps6	2.8e-26	1825	2423	0.985	0.99	6.7e-24	-0.00858	-0.41	DOWN
Ssrp1	Ssrp1	1.5e-06	106	142	0.335	0.48	3.8e-05	-0.14583	-0.41	DOWN
St13	St13	1.9e-05	102	135	0.328	0.47	0.00034	-0.14487	-0.41	DOWN
Ppm1h	Ppm1h	3e-05	60	79	0.191	0.31	0.00051	-0.12107	-0.41	DOWN
Utp14a	Utp14a	8e-05	38	51	0.144	0.24	0.0012	-0.09833	-0.41	DOWN
Pde3b	Pde3b	8e-05	54	71	0.176	0.29	0.0012	-0.10916	-0.41	DOWN
Alyref	Alyref	8.4e-05	59	79	0.218	0.33	0.0012	-0.11059	-0.41	DOWN
Rmnd5a	Rmnd5a	0.00037	29	38	0.119	0.2	0.0042	-0.08373	-0.41	DOWN
Eif4e	Eif4e	0.00056	40	53	0.181	0.27	0.0059	-0.09369	-0.41	DOWN
Trim59	Trim59	0.0013	35	46	0.144	0.22	0.012	-0.07521	-0.41	DOWN
Rpl23	Rpl23	3.8e-31	4415	5911	1	1	1.5e-28		-0.42	DOWN
Rplp2	Rplp2	1.1e-29	3210	4300	1	1	3.8e-27	0.00158	-0.42	DOWN
Rps12	Rps12	1.1e-25	3596	4817	0.998	1	2.4e-23	-0.00143	-0.42	DOWN
Serbp1	Serbp1	1.7e-10	576	770	0.829	0.91	1e-08	-0.07663	-0.42	DOWN
Pebp1	Pebp1	1.1e-07	109	146	0.342	0.52	3.4e-06	-0.1757	-0.42	DOWN
Lsm7	Lsm7	9.1e-07	66	88	0.221	0.37	2.4e-05	-0.1533	-0.42	DOWN
Nudcd2	Nudcd2	1.3e-05	28	37	0.102	0.2	0.00025	-0.10163	-0.42	DOWN
Idh3g	Idh3g	4.2e-05	50	67	0.213	0.34	0.00068	-0.12186	-0.42	DOWN
Dbf4	Dbf4	4.4e-05	33	44	0.109	0.21	0.00072	-0.09786	-0.42	DOWN
Eprs	Eprs	5.8e-05	83	111	0.288	0.42	0.00091	-0.13202	-0.42	DOWN
Vps37b	Vps37b	7.9e-05	109	147	0.266	0.39	0.0012	-0.12755	-0.42	DOWN
Psmd6	Psmd6	8.4e-05	54	72	0.226	0.34	0.0012	-0.11261	-0.42	DOWN
Timm44	Timm44	0.00024	34	46	0.141	0.23	0.0029	-0.0924	-0.42	DOWN
Polr2h	Polr2h	0.00095	31	41	0.139	0.22	0.009	-0.0807	-0.42	DOWN
Rpl3	Rpl3	4.2e-26	1909	2564	0.988	0.99	1e-23	-0.00295	-0.43	DOWN
Ptbp1	Ptbp1	3.5e-06	70	93	0.258	0.4	8e-05	-0.14288	-0.43	DOWN
Ndufc1	Ndufc1	3.6e-06	87	117	0.3	0.45	8.1e-05	-0.15114	-0.43	DOWN
Pdcd11	Pdcd11	2.9e-05	49	66	0.174	0.29	0.0005	-0.11532	-0.43	DOWN
Gps1	Gps1	8.1e-05	30	41	0.124	0.22	0.0012	-0.09506	-0.43	DOWN
Ndufab1	Ndufab1	8.5e-05	73	98	0.298	0.41	0.0012	-0.11421	-0.43	DOWN
Snrnp40	Snrnp40	0.00011	41	55	0.184	0.29	0.0016	-0.10645	-0.43	DOWN
Ctsz	Ctsz	0.00021	34	45	0.136	0.22	0.0027	-0.08791	-0.43	DOWN
Nob1	Nob1	0.00039	30	40	0.119	0.2	0.0044	-0.08373	-0.43	DOWN
Mcm6	Mcm6	0.0044	67	90	0.231	0.31	0.03	-0.07717	-0.43	DOWN
Rpl35a	Rpl35a	1e-32	2804	3816	0.988	1	4.4e-30	-0.00978	-0.44	DOWN
Thrap3	Thrap3	7.5e-09	151	206	0.422	0.61	3.2e-07	-0.18563	-0.44	DOWN
Syncrip	Syncrip	1.4e-07	106	144	0.325	0.5	4.4e-06	-0.17362	-0.44	DOWN
G3bp1	G3bp1	2e-07	123	168	0.382	0.55	5.9e-06	-0.1649	-0.44	DOWN
Mat2a	Mat2a	2.2e-07	96	130	0.29	0.45	6.5e-06	-0.16317	-0.44	DOWN
Rif1	Rif1	4.8e-06	92	126	0.3	0.44	0.0001	-0.14116	-0.44	DOWN
Larp1	Larp1	6.9e-06	82	111	0.273	0.42	0.00014	-0.14639	-0.44	DOWN
Hmgb1	Hmgb1	8.7e-06	488	661	0.819	0.86	0.00017	-0.04557	-0.44	DOWN
Sun2	Sun2	1.5e-05	70	95	0.241	0.38	0.00027	-0.1345	-0.44	DOWN
Psmd3	Psmd3	3.5e-05	39	53	0.169	0.28	0.00058	-0.11293	-0.44	DOWN
Oxct1	Oxct1	0.0002	40	54	0.164	0.26	0.0026	-0.09687	-0.44	DOWN
AY036118	AY036118	0.0003	103	141	0.295	0.41	0.0035	-0.11459	-0.44	DOWN
Mrpl11	Mrpl11	0.00038	28	38	0.119	0.2	0.0043	-0.08373	-0.44	DOWN
Clec2i	Clec2i	0.00089	48	65	0.176	0.26	0.0086	-0.08656	-0.44	DOWN
Rcor1	Rcor1	0.0017	39	53	0.166	0.25	0.014	-0.08125	-0.44	DOWN
Rps3a1	Rps3a1	3.1e-36	3256	4454	1	1	2e-33	0.00105	-0.45	DOWN
Rpl13	Rpl13	5e-35	5082	6962	1	1	2.8e-32		-0.45	DOWN
Rps18	Rps18	2.9e-33	3549	4861	1	1	1.3e-30		-0.45	DOWN
Rps25	Rps25	1.1e-24	1263	1728	0.958	0.98	2.4e-22	-0.02589	-0.45	DOWN
Rpl22l1	Rpl22l1	4.5e-14	561	764	0.804	0.9	4.6e-12	-0.10092	-0.45	DOWN
Hnrnpu	Hnrnpu	1.4e-09	307	420	0.653	0.78	6.9e-08	-0.12879	-0.45	DOWN
Snu13	Snu13	5.1e-08	122	168	0.385	0.56	1.8e-06	-0.17608	-0.45	DOWN
Peli1	Peli1	2.3e-07	188	257	0.469	0.64	6.8e-06	-0.17053	-0.45	DOWN
Psmd12	Psmd12	1.2e-06	58	79	0.216	0.36	3.2e-05	-0.14092	-0.45	DOWN
Psmc1	Psmc1	1e-05	50	68	0.201	0.33	0.00019	-0.12533	-0.45	DOWN
Snrpa	Snrpa	1.3e-05	39	53	0.154	0.27	0.00025	-0.11363	-0.45	DOWN
Gm2000	Gm2000	1.5e-05	38	53	0.164	0.28	0.00028	-0.11631	-0.45	DOWN
Usp24	Usp24	0.00017	42	57	0.164	0.26	0.0022	-0.09687	-0.45	DOWN
Nifk	Nifk	0.00024	40	55	0.161	0.26	0.0029	-0.09462	-0.45	DOWN
Rpl5	Rpl5	3.3e-27	1723	2378	0.988	0.99	9.3e-25	-0.0061	-0.46	DOWN
Rpl23a	Rpl23a	5.9e-27	1484	2042	0.978	0.99	1.6e-24	-0.01392	-0.46	DOWN
Foxp1	Foxp1	1.8e-08	233	320	0.511	0.68	6.9e-07	-0.17249	-0.46	DOWN
Srsf6	Srsf6	4.2e-07	91	125	0.325	0.48	1.2e-05	-0.15786	-0.46	DOWN
Cycs	Cycs	8.3e-07	114	157	0.362	0.51	2.2e-05	-0.14691	-0.46	DOWN
Cbx1	Cbx1	2e-06	90	123	0.3	0.46	4.6e-05	-0.16165	-0.46	DOWN
Skp1a	Skp1a	8.9e-06	57	78	0.213	0.34	0.00018	-0.12974	-0.46	DOWN
Rpl7l1	Rpl7l1	3.3e-05	38	52	0.151	0.26	0.00055	-0.1098	-0.46	DOWN
Pag1	Pag1	0.00025	51	70	0.196	0.3	0.0031	-0.10402	-0.46	DOWN
Phb	Phb	0.0004	30	42	0.124	0.21	0.0045	-0.08297	-0.46	DOWN
Eef1g	Eef1g	4.7e-14	431	598	0.757	0.87	4.8e-12	-0.11496	-0.47	DOWN
Kcnq1ot1	Kcnq1ot1	9.8e-11	204	282	0.367	0.58	5.9e-09	-0.21079	-0.47	DOWN
Bcl2	Bcl2	6.3e-10	268	371	0.434	0.63	3.4e-08	-0.19109	-0.47	DOWN
Il7r	Il7r	3.9e-08	264	365	0.337	0.51	1.4e-06	-0.17593	-0.47	DOWN
Zeb1	Zeb1	6.7e-06	46	64	0.161	0.28	0.00014	-0.11722	-0.47	DOWN
Rsl1d1	Rsl1d1	7.9e-06	70	97	0.263	0.4	0.00016	-0.13897	-0.47	DOWN
Abce1	Abce1	1.8e-05	47	65	0.171	0.28	0.00033	-0.11255	-0.47	DOWN
Eif1ad	Eif1ad	0.00016	30	42	0.134	0.23	0.0021	-0.09301	-0.47	DOWN
Txlna	Txlna	0.0004	31	43	0.132	0.22	0.0045	-0.08446	-0.47	DOWN
Rab3gap1	Rab3gap1	0.00049	40	55	0.169	0.26	0.0053	-0.08875	-0.47	DOWN
Rpl10	Rpl10	4.7e-30	1604	2242	0.96	0.99	1.7e-27	-0.02551	-0.48	DOWN
Tcp1	Tcp1	4.1e-07	104	145	0.352	0.5	1.2e-05	-0.15211	-0.48	DOWN
Psmd7	Psmd7	4.8e-07	67	94	0.243	0.4	1.3e-05	-0.15672	-0.48	DOWN
Sf3a3	Sf3a3	1.9e-06	41	56	0.156	0.28	4.6e-05	-0.12849	-0.48	DOWN
Dgkd	Dgkd	0.00019	47	66	0.191	0.29	0.0025	-0.10321	-0.48	DOWN
Slbp	Slbp	0.00022	85	118	0.293	0.4	0.0027	-0.10919	-0.48	DOWN
Rpl12	Rpl12	1.9e-28	3174	4455	0.995	1	5.8e-26	-0.00286	-0.49	DOWN
Pcbp1	Pcbp1	9.5e-08	133	187	0.429	0.59	3.1e-06	-0.16084	-0.49	DOWN
Rcsd1	Rcsd1	1e-07	110	155	0.337	0.51	3.3e-06	-0.1733	-0.49	DOWN
Prmt1	Prmt1	1.1e-07	66	93	0.231	0.39	3.4e-06	-0.16072	-0.49	DOWN
Ncaph2	Ncaph2	1e-06	36	51	0.139	0.26	2.6e-05	-0.12589	-0.49	DOWN
Cdc26	Cdc26	1.5e-06	38	54	0.151	0.28	3.7e-05	-0.12504	-0.49	DOWN
Naa50	Naa50	3.8e-06	38	53	0.146	0.27	8.4e-05	-0.12107	-0.49	DOWN
Usp9x	Usp9x	1.5e-05	49	69	0.189	0.31	0.00028	-0.11987	-0.49	DOWN
Herpud1	Herpud1	5.4e-05	37	52	0.149	0.25	0.00086	-0.10335	-0.49	DOWN
Dicer1	Dicer1	7e-05	43	60	0.169	0.27	0.0011	-0.10504	-0.49	DOWN
Zfp280d	Zfp280d	7.7e-05	43	60	0.161	0.27	0.0012	-0.10513	-0.49	DOWN
Gpr65	Gpr65	9.8e-05	35	50	0.139	0.23	0.0014	-0.09436	-0.49	DOWN
Odc1	Odc1	0.00012	42	59	0.146	0.24	0.0017	-0.0969	-0.49	DOWN
D10Wsu102e	D10Wsu102e	0.00021	37	52	0.129	0.22	0.0027	-0.08852	-0.49	DOWN
Ipo7	Ipo7	0.0013	28	39	0.134	0.21	0.012	-0.07672	-0.49	DOWN
Rplp1	Rplp1	4.1e-38	5443	7711	1	1	3.2e-35		-0.5	DOWN
Rpl15	Rpl15	1.5e-31	1855	2619	0.985	0.99	6.1e-29	-0.00806	-0.5	DOWN
Eif3b	Eif3b	1.4e-06	62	88	0.228	0.37	3.5e-05	-0.1385	-0.5	DOWN
Mrpl28	Mrpl28	1.9e-06	37	53	0.141	0.27	4.5e-05	-0.12551	-0.5	DOWN
Sae1	Sae1	2.4e-05	41	58	0.181	0.3	0.00043	-0.11733	-0.5	DOWN
Fam169b	Fam169b	2.5e-05	65	93	0.211	0.33	0.00044	-0.11699	-0.5	DOWN
Nop14	Nop14	6e-05	39	54	0.141	0.24	0.00093	-0.10081	-0.5	DOWN
Hat1	Hat1	7.5e-05	33	46	0.132	0.23	0.0011	-0.09602	-0.5	DOWN
Cep295	Cep295	0.0001	30	42	0.114	0.21	0.0015	-0.09132	-0.5	DOWN
Dennd2d	Dennd2d	0.00012	40	56	0.156	0.26	0.0017	-0.10011	-0.5	DOWN
Ppp1r15a	Ppp1r15a	0.0011	43	61	0.156	0.24	0.0099	-0.08119	-0.5	DOWN
Rps26	Rps26	1.6e-33	2017	2880	0.983	0.99	7.4e-31	-0.00949	-0.51	DOWN
Ddx39	Ddx39	1.5e-05	58	83	0.228	0.35	0.00029	-0.12169	-0.51	DOWN
Isy1	Isy1	0.00024	38	54	0.176	0.27	0.003	-0.0955	-0.51	DOWN
Ddit4	Ddit4	0.00088	42	60	0.171	0.25	0.0085	-0.08364	-0.51	DOWN
Rnmt	Rnmt	0.00088	29	42	0.134	0.21	0.0085	-0.0783	-0.51	DOWN
Rpl28	Rpl28	1e-35	2321	3320	0.985	1	6.1e-33	-0.01016	-0.52	DOWN
Mrpl12	Mrpl12	9.2e-07	61	87	0.233	0.38	2.4e-05	-0.14983	-0.52	DOWN
Cacybp	Cacybp	9.5e-07	70	100	0.273	0.42	2.5e-05	-0.14533	-0.52	DOWN
Pes1	Pes1	5.9e-05	31	44	0.127	0.22	0.00092	-0.09626	-0.52	DOWN
Rps28	Rps28	4.3e-17	2459	3541	0.975	0.99	5.7e-15	-0.01693	-0.53	DOWN
Zfp36l1	Zfp36l1	2.4e-09	134	193	0.313	0.52	1.1e-07	-0.20442	-0.53	DOWN
Phgdh	Phgdh	1.4e-06	61	88	0.213	0.35	3.5e-05	-0.13184	-0.53	DOWN
Txnl4a	Txnl4a	4.8e-05	31	44	0.139	0.24	0.00078	-0.10119	-0.53	DOWN
Rps8	Rps8	1.1e-47	3739	5435	0.998	1	2.2e-44	-0.00196	-0.54	DOWN
Txk	Txk	2.4e-10	187	271	0.427	0.62	1.3e-08	-0.19327	-0.54	DOWN
Suz12	Suz12	1.3e-06	61	88	0.223	0.37	3.4e-05	-0.14294	-0.54	DOWN
Add1	Add1	2.6e-06	66	96	0.266	0.4	6.1e-05	-0.13859	-0.54	DOWN
Pdia6	Pdia6	2.6e-06	56	81	0.203	0.34	6.1e-05	-0.13179	-0.54	DOWN
Rasa2	Rasa2	6e-06	52	76	0.184	0.31	0.00013	-0.12641	-0.54	DOWN
Prpf19	Prpf19	6.6e-06	29	42	0.122	0.23	0.00014	-0.11225	-0.54	DOWN
Srsf7	Srsf7	3e-09	80	117	0.268	0.45	1.4e-07	-0.1771	-0.55	DOWN
Hdgf	Hdgf	4.1e-08	101	147	0.318	0.48	1.5e-06	-0.1611	-0.55	DOWN
Tcerg1	Tcerg1	2e-07	47	69	0.159	0.3	6e-06	-0.1444	-0.55	DOWN
Cetn3	Cetn3	3.7e-07	53	77	0.211	0.35	1.1e-05	-0.14011	-0.55	DOWN
Clns1a	Clns1a	2.2e-05	37	54	0.164	0.28	0.00039	-0.11158	-0.55	DOWN
Hmgb2	Hmgb2	0.00015	626	916	0.789	0.68	0.002	0.1091	-0.55	DOWN
Rps19	Rps19	9.4e-39	3170	4690	0.995	1	8.6e-36	-0.00286	-0.56	DOWN
Hsp90ab1	Hsp90ab1	2.5e-19	1064	1564	0.95	0.98	3.7e-17	-0.02493	-0.56	DOWN
Snrpf	Snrpf	5.7e-13	210	311	0.571	0.73	4.9e-11	-0.15708	-0.56	DOWN
Anp32b	Anp32b	9.9e-10	279	411	0.615	0.74	5e-08	-0.1245	-0.56	DOWN
Evl	Evl	5.5e-09	140	207	0.4	0.59	2.4e-07	-0.18957	-0.56	DOWN
Nap1l1	Nap1l1	7.2e-09	152	224	0.437	0.6	3.1e-07	-0.16128	-0.56	DOWN
2810004N23Rik	2810004N23Rik	7.5e-07	50	73	0.174	0.31	2e-05	-0.13739	-0.56	DOWN
Gm47283	Gm47283	4.6e-05	73	108	0.213	0.32	0.00074	-0.10925	-0.56	DOWN
Rps29	Rps29	1.9e-24	5860	8676	1	1	3.8e-22		-0.57	DOWN
Nudc	Nudc	1.4e-08	78	116	0.275	0.44	5.5e-07	-0.1686	-0.57	DOWN
Fam208b	Fam208b	2.9e-06	49	72	0.179	0.31	6.6e-05	-0.1277	-0.57	DOWN
Scml4	Scml4	0.00029	35	52	0.136	0.22	0.0035	-0.08318	-0.57	DOWN
Rpl35	Rpl35	1.4e-33	1354	2018	0.948	0.98	6.5e-31	-0.03477	-0.58	DOWN
Farsb	Farsb	1.4e-05	25	37	0.102	0.2	0.00026	-0.09952	-0.58	DOWN
Msh3	Msh3	0.00034	28	42	0.124	0.21	0.0039	-0.08192	-0.58	DOWN
Hnrnpab	Hnrnpab	1.2e-09	153	230	0.414	0.59	6e-08	-0.1731	-0.59	DOWN
Rpl10-ps3	Rpl10-ps3	2e-09	72	108	0.261	0.45	9.6e-08	-0.18769	-0.59	DOWN
Gspt1	Gspt1	1.1e-07	71	107	0.268	0.43	3.5e-06	-0.15713	-0.59	DOWN
Cdk4	Cdk4	3.9e-07	62	93	0.243	0.39	1.1e-05	-0.14516	-0.59	DOWN
Mrpl17	Mrpl17	1.3e-06	33	50	0.132	0.26	3.3e-05	-0.12387	-0.59	DOWN
Mrps17	Mrps17	2.7e-06	35	53	0.151	0.27	6.1e-05	-0.12294	-0.59	DOWN
Rapgef6	Rapgef6	3.4e-09	178	271	0.499	0.67	1.5e-07	-0.17018	-0.6	DOWN
Srsf10	Srsf10	8.3e-09	74	112	0.275	0.45	3.4e-07	-0.17281	-0.6	DOWN
Cct3	Cct3	1.5e-08	85	129	0.288	0.46	6.1e-07	-0.17091	-0.6	DOWN
Pgam1	Pgam1	5.5e-07	52	79	0.208	0.35	1.5e-05	-0.14364	-0.6	DOWN
Tbl1x	Tbl1x	9.8e-07	43	65	0.159	0.29	2.6e-05	-0.13231	-0.6	DOWN
Larp4	Larp4	2.4e-05	35	53	0.139	0.24	0.00042	-0.10329	-0.6	DOWN
Strbp	Strbp	3.9e-05	29	43	0.117	0.21	0.00064	-0.09515	-0.6	DOWN
Rps2	Rps2	1.7e-38	2361	3612	0.975	0.99	1.4e-35	-0.01483	-0.61	DOWN
Smc1a	Smc1a	8.9e-10	121	185	0.362	0.54	4.5e-08	-0.1816	-0.61	DOWN
Bcap29	Bcap29	5.1e-06	26	40	0.107	0.21	0.00011	-0.10612	-0.61	DOWN
Stt3b	Stt3b	3.8e-05	26	39	0.109	0.2	0.00063	-0.09155	-0.61	DOWN
Eef1b2	Eef1b2	5.1e-34	1084	1662	0.923	0.97	2.5e-31	-0.05117	-0.62	DOWN
Rars	Rars	5.5e-07	37	57	0.149	0.28	1.5e-05	-0.13225	-0.62	DOWN
Stoml2	Stoml2	7.1e-06	23	36	0.102	0.2	0.00014	-0.10215	-0.62	DOWN
Rpl31	Rpl31	1.9e-26	538	830	0.806	0.93	4.7e-24	-0.12208	-0.63	DOWN
Ddx21	Ddx21	2e-09	163	252	0.432	0.6	9.7e-08	-0.16624	-0.63	DOWN
Rps12-ps3	Rps12-ps3	2.4e-07	42	65	0.164	0.3	7.1e-06	-0.14048	-0.63	DOWN
Rad50	Rad50	2.5e-06	41	64	0.169	0.29	5.8e-05	-0.12396	-0.63	DOWN
Dars	Dars	6.8e-06	32	50	0.144	0.26	0.00014	-0.11462	-0.63	DOWN
Tspan13	Tspan13	1.5e-06	43	67	0.164	0.29	3.6e-05	-0.1305	-0.64	DOWN
Ftsj3	Ftsj3	9.8e-06	34	53	0.132	0.24	0.00019	-0.10706	-0.64	DOWN
Set	Set	2.3e-14	276	433	0.635	0.78	2.4e-12	-0.14301	-0.65	DOWN
Srsf2	Srsf2	3.8e-10	139	217	0.409	0.59	2.1e-08	-0.18174	-0.65	DOWN
Fkbp4	Fkbp4	3.1e-09	52	82	0.179	0.35	1.4e-07	-0.17026	-0.65	DOWN
Mif	Mif	7.3e-12	233	369	0.548	0.72	5.1e-10	-0.17468	-0.66	DOWN
Zbtb20	Zbtb20	1.3e-07	82	130	0.184	0.33	4e-06	-0.14533	-0.66	DOWN
Prpf31	Prpf31	4.7e-06	24	38	0.104	0.21	0.0001	-0.10703	-0.66	DOWN
Id3	Id3	1e-05	48	77	0.122	0.22	0.00019	-0.10174	-0.66	DOWN
Sipa1l1	Sipa1l1	1.6e-05	32	51	0.129	0.23	0.0003	-0.10376	-0.66	DOWN
Fbl	Fbl	2.1e-10	97	154	0.333	0.52	1.2e-08	-0.18352	-0.67	DOWN
Nme1	Nme1	2.5e-11	154	247	0.437	0.62	1.7e-09	-0.18335	-0.68	DOWN
Trp53	Trp53	2.6e-11	84	135	0.303	0.51	1.7e-09	-0.21172	-0.68	DOWN
Hsp90aa1	Hsp90aa1	5.9e-11	249	398	0.578	0.73	3.7e-09	-0.15069	-0.68	DOWN
Atic	Atic	2.3e-07	35	57	0.136	0.27	6.9e-06	-0.13257	-0.68	DOWN
Sesn3	Sesn3	1.3e-06	64	103	0.253	0.39	3.3e-05	-0.13839	-0.68	DOWN
Rpl36a	Rpl36a	2.8e-40	1195	1931	0.945	0.98	3.1e-37	-0.03094	-0.69	DOWN
Ncl	Ncl	1.7e-13	458	741	0.779	0.87	1.5e-11	-0.09052	-0.69	DOWN
Ttc3	Ttc3	1.6e-08	63	102	0.203	0.37	6.2e-07	-0.16437	-0.69	DOWN
Actn1	Actn1	1.6e-06	64	103	0.221	0.35	3.9e-05	-0.12545	-0.69	DOWN
Tcf7	Tcf7	2.5e-12	163	265	0.375	0.59	1.9e-10	-0.22016	-0.7	DOWN
Nhp2	Nhp2	8.6e-10	71	116	0.246	0.42	4.4e-08	-0.17683	-0.7	DOWN
Ppid	Ppid	2.7e-08	35	56	0.136	0.28	1e-06	-0.14518	-0.7	DOWN
Wdr43	Wdr43	1.3e-07	72	118	0.275	0.43	4.2e-06	-0.15073	-0.7	DOWN
Pds5b	Pds5b	2.9e-07	31	50	0.122	0.25	8.5e-06	-0.12749	-0.7	DOWN
Rpl36a-ps1	Rpl36a-ps1	6.7e-06	24	39	0.112	0.22	0.00014	-0.10431	-0.7	DOWN
Klf7	Klf7	3.2e-05	33	55	0.129	0.22	0.00054	-0.09272	-0.71	DOWN
Hspe1	Hspe1	2.7e-16	247	408	0.6	0.77	3.4e-14	-0.17354	-0.72	DOWN
Mrpl23	Mrpl23	9.4e-13	74	121	0.256	0.47	7.8e-11	-0.21735	-0.72	DOWN
Hmgn2	Hmgn2	1.8e-05	69	113	0.228	0.34	0.00034	-0.1075	-0.72	DOWN
Epb41l4aos	Epb41l4aos	4.1e-05	28	46	0.124	0.22	0.00066	-0.09401	-0.72	DOWN
Rbmxl1	Rbmxl1	3.4e-11	39	64	0.136	0.31	2.2e-09	-0.17566	-0.73	DOWN
Snrpd1	Snrpd1	5.8e-10	81	135	0.28	0.46	3.1e-08	-0.17783	-0.73	DOWN
Gart	Gart	1.3e-06	27	45	0.112	0.23	3.3e-05	-0.11535	-0.73	DOWN
Cbx5	Cbx5	1.7e-06	40	66	0.166	0.28	4.2e-05	-0.11856	-0.73	DOWN
Npm1	Npm1	1.8e-24	630	1051	0.841	0.93	3.7e-22	-0.08892	-0.74	DOWN
Ssh2	Ssh2	2.5e-12	115	193	0.347	0.55	1.9e-10	-0.20279	-0.74	DOWN
Banf1	Banf1	5.5e-12	81	136	0.29	0.49	3.9e-10	-0.1989	-0.74	DOWN
Rps17	Rps17	1e-39	703	1180	0.854	0.95	1.1e-36	-0.09701	-0.75	DOWN
Fkbp2	Fkbp2	2.9e-06	31	53	0.136	0.25	6.6e-05	-0.11576	-0.75	DOWN
Rps20	Rps20	8.8e-57	3421	5793	0.995	1	2.2e-53	-0.00286	-0.76	DOWN
Topbp1	Topbp1	1.6e-08	33	56	0.127	0.27	6.3e-07	-0.14355	-0.76	DOWN
Rpgrip1	Rpgrip1	1.7e-06	30	51	0.122	0.23	4.2e-05	-0.11225	-0.76	DOWN
Eif5a	Eif5a	3.4e-15	261	446	0.578	0.76	3.9e-13	-0.18064	-0.77	DOWN
Klhdc2	Klhdc2	3.8e-06	34	59	0.149	0.26	8.4e-05	-0.11439	-0.77	DOWN
Dut	Dut	0.00029	75	128	0.268	0.35	0.0034	-0.08514	-0.77	DOWN
Mybbp1a	Mybbp1a	3.7e-09	53	91	0.181	0.34	1.7e-07	-0.16305	-0.78	DOWN
Uchl5	Uchl5	1.7e-07	25	43	0.107	0.23	5.2e-06	-0.12346	-0.78	DOWN
Rras2	Rras2	3.9e-07	31	52	0.117	0.24	1.1e-05	-0.12352	-0.78	DOWN
Jun	Jun	1.6e-06	44	76	0.132	0.25	3.8e-05	-0.11599	-0.78	DOWN
Nucks1	Nucks1	1.6e-11	126	218	0.392	0.57	1e-09	-0.17914	-0.79	DOWN
Smarcc1	Smarcc1	2e-10	44	75	0.164	0.33	1.1e-08	-0.16939	-0.79	DOWN
Hspd1	Hspd1	2.8e-09	101	174	0.33	0.5	1.3e-07	-0.17129	-0.79	DOWN
Hdac2	Hdac2	2e-08	21	37	0.084	0.21	7.6e-07	-0.1274	-0.79	DOWN
Acyp1	Acyp1	2.2e-07	26	45	0.102	0.22	6.6e-06	-0.12107	-0.79	DOWN
Nsun2	Nsun2	2.8e-06	33	57	0.146	0.26	6.6e-05	-0.11739	-0.79	DOWN
Kdm6b	Kdm6b	4.6e-06	36	62	0.124	0.23	0.0001	-0.10767	-0.79	DOWN
Eif4a1	Eif4a1	9.4e-18	216	376	0.563	0.76	1.3e-15	-0.1929	-0.8	DOWN
Hspa9	Hspa9	9e-09	46	79	0.174	0.33	3.7e-07	-0.15368	-0.8	DOWN
Ms4a4c	Ms4a4c	9.2e-08	56	97	0.179	0.31	3e-06	-0.13243	-0.8	DOWN
Ran	Ran	9.6e-14	231	403	0.576	0.71	9.2e-12	-0.13635	-0.81	DOWN
Pcgf5	Pcgf5	3.7e-08	30	53	0.109	0.24	1.3e-06	-0.12992	-0.81	DOWN
Hjurp	Hjurp	1e-07	40	69	0.139	0.27	3.4e-06	-0.13377	-0.81	DOWN
Hdac4	Hdac4	1.1e-06	27	48	0.112	0.23	2.8e-05	-0.11482	-0.81	DOWN
Pa2g4	Pa2g4	1.5e-10	69	122	0.261	0.44	8.5e-09	-0.17771	-0.83	DOWN
Znrf1	Znrf1	1.3e-06	26	46	0.109	0.22	3.4e-05	-0.111	-0.83	DOWN
Rbbp7	Rbbp7	6.9e-11	64	114	0.246	0.43	4.2e-09	-0.18629	-0.84	DOWN
Pecam1	Pecam1	1.9e-07	36	66	0.134	0.26	5.6e-06	-0.12665	-0.85	DOWN
Lyar	Lyar	1.3e-09	35	64	0.127	0.28	6.3e-08	-0.15564	-0.87	DOWN
Ruvbl1	Ruvbl1	3.3e-07	24	44	0.107	0.22	9.4e-06	-0.11716	-0.87	DOWN
Tuba1c	Tuba1c	6e-06	36	66	0.127	0.23	0.00013	-0.10624	-0.87	DOWN
Anp32e	Anp32e	3.5e-10	74	136	0.256	0.43	1.9e-08	-0.17532	-0.88	DOWN
Snhg12	Snhg12	1.7e-09	33	60	0.112	0.26	8.2e-08	-0.14793	-0.88	DOWN
Ndufaf4	Ndufaf4	2.5e-08	25	45	0.087	0.21	9.3e-07	-0.12545	-0.88	DOWN
Sptbn1	Sptbn1	3.8e-16	109	202	0.35	0.58	4.8e-14	-0.23236	-0.89	DOWN
Nasp	Nasp	1e-11	52	96	0.176	0.36	7e-10	-0.18746	-0.89	DOWN
Pcna	Pcna	3.3e-08	46	86	0.171	0.31	1.2e-06	-0.13987	-0.89	DOWN
Dph5	Dph5	1.4e-08	35	66	0.127	0.26	5.5e-07	-0.13829	-0.9	DOWN
Nop56	Nop56	1.1e-14	84	158	0.27	0.5	1.2e-12	-0.23137	-0.91	DOWN
Rflnb	Rflnb	1.8e-06	32	60	0.109	0.21	4.4e-05	-0.10574	-0.91	DOWN
Tubb5	Tubb5	4e-14	318	602	0.65	0.79	4.1e-12	-0.14231	-0.92	DOWN
Atad2	Atad2	1.2e-08	53	100	0.199	0.35	4.6e-07	-0.14884	-0.92	DOWN
Tuba4a	Tuba4a	6.6e-11	43	81	0.151	0.33	4e-09	-0.17601	-0.93	DOWN
Nop58	Nop58	9.4e-13	75	143	0.263	0.47	7.8e-11	-0.20571	-0.94	DOWN
Pik3ip1	Pik3ip1	1.4e-07	43	83	0.156	0.29	4.4e-06	-0.12954	-0.94	DOWN
Ilf3	Ilf3	1.1e-08	23	45	0.092	0.22	4.3e-07	-0.13257	-0.96	DOWN
Bzw2	Bzw2	1.6e-14	46	90	0.159	0.37	1.7e-12	-0.21218	-0.97	DOWN
Rfc1	Rfc1	8.9e-11	39	76	0.154	0.32	5.3e-09	-0.1688	-0.97	DOWN
Hist1h4d	Hist1h4d	0.00081	38	74	0.141	0.22	0.008	-0.07559	-0.97	DOWN
Bach2	Bach2	6.4e-06	27	54	0.104	0.2	0.00013	-0.09757	-0.98	DOWN
Ncapd3	Ncapd3	2.3e-09	29	57	0.107	0.25	1.1e-07	-0.14606	-0.99	DOWN
Mrto4	Mrto4	3.3e-09	23	47	0.082	0.22	1.5e-07	-0.13567	-1	DOWN
Hist1h1e	Hist1h1e	3.3e-05	69	139	0.203	0.31	0.00056	-0.10551	-1	DOWN
Lsm2	Lsm2	2.5e-12	31	63	0.119	0.3	1.9e-10	-0.1841	-1.01	DOWN
Ranbp1	Ranbp1	5.2e-15	84	170	0.266	0.48	5.9e-13	-0.21584	-1.02	DOWN
Fam162a	Fam162a	5.6e-10	26	52	0.109	0.26	3e-08	-0.15146	-1.02	DOWN
Trmt1	Trmt1	6.2e-09	23	46	0.087	0.22	2.7e-07	-0.13175	-1.02	DOWN
Dctpp1	Dctpp1	1.2e-08	24	49	0.099	0.23	4.8e-07	-0.13406	-1.03	DOWN
C1qbp	C1qbp	4e-13	51	105	0.194	0.39	3.6e-11	-0.19689	-1.05	DOWN
Gnl3	Gnl3	4.2e-10	48	99	0.186	0.35	2.3e-08	-0.16072	-1.05	DOWN
Neurl3	Neurl3	7.5e-08	36	74	0.141	0.27	2.5e-06	-0.12971	-1.05	DOWN
Hmgn1	Hmgn1	1.5e-18	69	147	0.243	0.49	2.1e-16	-0.24973	-1.08	DOWN
Il4ra	Il4ra	1.7e-10	25	52	0.094	0.24	1e-08	-0.14743	-1.08	DOWN
Dapl1	Dapl1	8.3e-09	110	232	0.141	0.28	3.4e-07	-0.13549	-1.08	DOWN
Mcm2	Mcm2	2.8e-08	22	46	0.097	0.22	1e-06	-0.12551	-1.09	DOWN
Ipo5	Ipo5	1.6e-07	17	37	0.087	0.2	4.9e-06	-0.11336	-1.09	DOWN
Ptma	Ptma	2.2e-36	853	1841	0.886	0.96	1.5e-33	-0.07421	-1.11	DOWN
Ppp1r14b	Ppp1r14b	8e-17	68	149	0.256	0.49	1e-14	-0.23207	-1.12	DOWN
Mcm4	Mcm4	2.3e-10	24	52	0.089	0.24	1.3e-08	-0.15082	-1.13	DOWN
Dkc1	Dkc1	2.1e-14	39	86	0.141	0.35	2.2e-12	-0.20696	-1.14	DOWN
Vars	Vars	3.9e-14	37	81	0.151	0.36	4.1e-12	-0.20544	-1.15	DOWN
Smc2	Smc2	1.2e-09	43	97	0.132	0.28	6e-08	-0.14962	-1.15	DOWN
Smc4	Smc4	2.2e-23	163	365	0.409	0.67	4.2e-21	-0.25636	-1.16	DOWN
Siva1	Siva1	2.2e-10	22	50	0.089	0.24	1.2e-08	-0.14766	-1.17	DOWN
Rcc2	Rcc2	1.6e-14	34	76	0.134	0.34	1.7e-12	-0.20337	-1.18	DOWN
H2afx	H2afx	2.5e-05	44	101	0.164	0.26	0.00044	-0.09792	-1.18	DOWN
Ppa1	Ppa1	7.1e-10	21	49	0.089	0.23	3.7e-08	-0.14188	-1.19	DOWN
Ube2s	Ube2s	1.4e-11	89	204	0.31	0.49	9.3e-10	-0.17853	-1.2	DOWN
Tpi1	Tpi1	6.7e-10	26	61	0.117	0.26	3.5e-08	-0.14769	-1.2	DOWN
Lmnb1	Lmnb1	9.3e-08	38	88	0.141	0.26	3e-06	-0.12288	-1.2	DOWN
Cd2ap	Cd2ap	4.9e-10	21	49	0.084	0.23	2.7e-08	-0.14212	-1.22	DOWN
Pdk1	Pdk1	5.8e-10	26	60	0.099	0.25	3.1e-08	-0.14615	-1.22	DOWN
Lef1	Lef1	1.8e-20	108	255	0.32	0.58	2.8e-18	-0.25583	-1.24	DOWN
Tmpo	Tmpo	1e-13	57	135	0.223	0.42	9.9e-12	-0.19549	-1.25	DOWN
Gar1	Gar1	1.5e-12	23	56	0.092	0.26	1.2e-10	-0.16725	-1.26	DOWN
Mdn1	Mdn1	6.5e-10	26	62	0.109	0.26	3.4e-08	-0.14621	-1.26	DOWN
Impdh2	Impdh2	2.6e-19	40	99	0.149	0.39	3.9e-17	-0.24523	-1.32	DOWN
Nolc1	Nolc1	5.9e-14	34	84	0.136	0.33	5.9e-12	-0.19248	-1.32	DOWN
Cks2	Cks2	1.5e-07	28	71	0.097	0.21	4.5e-06	-0.11395	-1.33	DOWN
Mcm7	Mcm7	1.4e-11	34	85	0.124	0.29	9.3e-10	-0.1639	-1.34	DOWN
Tubb4b	Tubb4b	4.7e-11	76	194	0.253	0.43	2.9e-09	-0.17202	-1.35	DOWN
Il6ra	Il6ra	3.6e-09	21	54	0.082	0.21	1.6e-07	-0.12778	-1.36	DOWN
Lig1	Lig1	7.7e-09	22	63	0.084	0.21	3.2e-07	-0.12215	-1.48	DOWN
N4bp2	N4bp2	1e-09	16	46	0.074	0.21	5.2e-08	-0.13155	-1.54	DOWN
Ikzf2	Ikzf2	9.1e-09	65	189	0.156	0.29	3.7e-07	-0.13742	-1.54	DOWN
Rrm1	Rrm1	1.4e-08	17	50	0.087	0.21	5.5e-07	-0.11914	-1.56	DOWN
Rgs10	Rgs10	7.2e-24	44	133	0.139	0.41	1.4e-21	-0.27513	-1.6	DOWN
Mcm3	Mcm3	6.2e-14	26	80	0.097	0.28	6.2e-12	-0.17858	-1.63	DOWN
Il6st	Il6st	6.1e-13	16	54	0.062	0.22	5.3e-11	-0.15814	-1.78	DOWN
Gpatch4	Gpatch4	1.7e-12	11	42	0.052	0.2	1.3e-10	-0.14915	-1.92	DOWN
Top2a	Top2a	3.4e-05	51	197	0.146	0.23	0.00057	-0.08534	-1.94	DOWN
Mki67	Mki67	0.00015	59	232	0.176	0.25	0.002	-0.07343	-1.98	DOWN
Mcm5	Mcm5	7.7e-14	14	56	0.06	0.22	7.5e-12	-0.1622	-1.99	DOWN
Sell	Sell	9.5e-43	79	320	0.184	0.57	1.3e-39	-0.38548	-2.02	DOWN
Srm	Srm	1.6e-13	12	48	0.05	0.21	1.5e-11	-0.15636	-2.03	DOWN
Nsg2	Nsg2	1.7e-22	21	89	0.089	0.33	3.1e-20	-0.24278	-2.1	DOWN
Xcl1	Xcl1	4.2e-12	30	130	0.057	0.2	3.1e-10	-0.14629	-2.1	DOWN
Satb1	Satb1	7.4e-45	61	281	0.189	0.58	1.1e-41	-0.3884	-2.21	DOWN
Tuba1b	Tuba1b	1.5e-29	68	329	0.226	0.52	5.2e-27	-0.29232	-2.27	DOWN
Ccr7	Ccr7	7.4e-22	21	108	0.089	0.32	1.3e-19	-0.23437	-2.4	DOWN
Stmn1	Stmn1	1.5e-12	49	279	0.132	0.29	1.2e-10	-0.15698	-2.52	DOWN
