# Supplementary material for: Dual checkpoint blockade of CD47 and PD-L1 using an affinity-tuned bispecific antibody maximizes antitumor immunity
Source: HighWire-hosted journal article supplement (doi:10.1136/jitc-2021-003464), 2021-10-01
Supplement: jitc-2021-003464supp010_data_supplement.xlsx [file jitc-2021-003464supp010_data_supplement.xlsx]

## Sheet: Flow cytometry antibodies
Antibody (clone)	Vendor	Catalog#/RRID
AF700 anti-mouse CD4 (GK1.5)	BioLegend	Cat# 100430, RRID: AB_493699
AF700 anti-mouse MHCII (M5/114.15.2)	Thermo Fisher Scientific	Cat# 56-5321-82, RRID: AB_494009
Alexa Fluor 647 anti-human IgG (Fcγ Fragment Specific)	Jackson ImmunoResearch Labs	Cat# 109-606-098, RRID: AB_2337899
Alexa Fluor 647 anti-mouse IgG (Fcγ Fragment Specific)	Jackson ImmunoResearch Labs	Cat# 115-136-071, RRID: AB_2338648
APC anti-human CD172a/b (SIRPα/β) (SE5A5)	BioLegend	Cat# 323810; RRID: AB_11219792
APC anti-human IgG, Fcγ fragment specific	Jackson ImmunoResearch Labs	Cat# 109-136-098, RRID: AB_2337693
APC anti-human PDL1 (MIH2)	BioLegend	Cat#393610; RRID: AB_2749927
APC anti-mouse DEC205 (NLDC-145)	BioLegend	Cat#138206; RRID: AB_10613641
APC anti-mouse PD-1 (RMP1-30)	BioLegend	Cat#109112; RRID: AB_10612938
APC anti-mouse SIRPα (P84)	eBioscience	Cat#17-1721-82; RRID: AB_10733158
APCCy7 anti-mouse CD11c (HL3)	BD Biosciences	Cat# 561241, RRID: AB_10611727
BUV395 anti-mouse Thy1.2 (53-2.1)	BD Biosciences	Cat# 565257, RRID: AB_2739136
BV421 anti-mouse Ly6G (1A8)	BioLegend	Cat#127628; RRID: AB_2562567
BV510 anti-mouse CD45 (30-F11)	BD Biosciences	Cat# 563891, RRID: AB_2734134
BV605 anti-mouse CD103 (2E7)	BioLegend	Cat# 121433; RRID:
		AB_2629724
BV605 anti-mouse CD47 (miap301)	BD Bioscience	Cat# 740382, RRID: AB_2740112
BV605 anti-mouse Ki67 (16A8)	BioLegend	Cat# 652413; RRID:
		AB_2562664
BV605 anti-mouse Ly6C (AL-21)	BD Biosciences	Cat# 563011, RRID: AB_2737949
BV650 anti-mouse CD86 (GL-1)	BioLegend	Cat# 105035; RRID: AB_11126147
BV650 anti-mouse CXCR3 (CXCR3-173)	BioLegend	Cat# 126531; RRID:
		AB_2563160
BV711 anti-mouse NKp46 (29A1.4)	BioLegend	Cat# 137621; RRID:
		AB_2563289
BV786 anti-human PDL1 (MIH1)	BD Biosciences	Cat# 563739, RRID: AB_2738397
BV786 anti-mouse CD11c (HL3)	BD Biosciences	Cat# 563735, RRID: AB_2738394
BV786 anti-mouse CD8a (53-6.7)	BD Biosciences	Cat# 563332; RRID: AB_2721167
BV786 anti-mouse CD8a (53-6.7)	BD Biosciences	Cat# 563332, RRID: AB_2721167
eF450 anti-mouse FoxP3 (FJK-16s)	Thermo Fisher Scientific	Cat# 48-5773-82, RRID: AB_1518812
FITC anti-mouse B220 (RA3-6B2)	BioLegend	Cat#103206; RRID: AB_312991
FITC anti-mouse CD44 (IM7)	BioLegend	Cat#103022; RRID: AB_493685
mouse Fc Block (2.4G2)	BD Biosciences	Cat# 553142, RRID: AB_394657
Pac Blue anti-mouse CD4 (GK1.5)	BioLegend	Cat# 100428, RRID: AB_493647
PE anti-mouse DCIR2 (33D1)	Thermo Fisher Scientific	Cat# 12-5884-83, RRID: AB_466003
PE anti-mouse Eomes (Dan11mag)	Thermo Fisher Scientific	Cat# 12-4875-82, RRID: AB_1603275
PE anti-mouse IL4R (1015F8)	BioLegend	Cat# 144804, RRID: AB_2561730
PE/Cy5 anti-mouse CCR7 (4B12)	BioLegend	Cat# 120114, RRID: AB_2072905
Pecy7 anti-mouse CD8a (53-6.7)	BioLegend	Cat# 100722, RRID: AB_312761
PECy7 anti-mouse F4/80 (BM8)	Thermo Fisher Scientific	Cat# 25-4801-82, RRID: AB_469653
PECy7 anti-mouse ICOS (C398.4A)	BioLegend	Cat# 313520, RRID: AB_10643411
Percp cy5.5 anti-mouse CD11b (M1/70)	BioLegend	Cat# 101228, RRID: AB_893232
PerCP Cy5.5 anti-mouse KLRG1 (2F1)	BioLegend	Cat# 138418, RRID: AB_2563015
PE anti-human CD47 (B6H12)	BD Bioscience	Cat# 556046, RRID: AB_396317
BUV563 anti-mouse CD45 (30-F11)	BD Biosciences	Cat#612924; RRID: AB_2870209
BUV496 anti-mouse NK1.1 (PK136)	BD Biosciences	Cat#741062; RRID: AB_2870674
BUV615 anti-mouse CD4 (GK1.5)	BD Biosciences	Cat#613006; RRID: AB_2870274
BUV661 anti-mouse CD19 (ID3)	BD Biosciences	Cat#612971; RRID: AB_2870243
BUV737 anti-mouse TCRb (5H7-597)	BD Biosciences	Cat#612821; RRID: AB_2870145
BUV805 anti-mouse CD8a (53-6.7)	BD Biosciences	Cat#612898; RRID: AB_2870186
BV480 anti-mouse CD25 (PC61)	BD Biosciences	Cat#566120, RRID: AB_2739522
eFluor506 anti-mouse Ki67 (SolA15)	Thermo Fisher Scientific	Cat#69-5698-82; RRID: AB_2637482
BV750 anti-mouse CD3 (17A2)	BioLegend	Cat#100249; RRID: AB_2734148
Alexa Fluor 532 anti-mouse FoxP3 (FJK-16s)	Thermo Fisher Scientific	Cat#58-5773-82; RRID: AB_11218870
PerCP anti-mouse CD44 (30-F11)	BioLegend	Cat#103130; RRID: AB_893339
PE anti-mouse Tcf1 (C63D9)	Cell Signaling Technology	Cat#14456; RRID: AB_279848
APC-R700 anti-mouse CD62L (MEL-14)	BD Biosciences	Cat#565159; RRID: AB_2737397
BV711 anti-mouse Lag3 (C9B7W)	BioLegend	Cat#125243; RRID: AB_2876450

## Sheet: CyTOF antibodies
Antibody (clone)		Vendor	Catalog#/RRID
Anti-mouse SiglecF (Clone: E50-2440) – 113In		BD	Cat#: 552125, RRID: AB_7264727
Anti-mouse CD117 (Clone: 2B8) – Purified		eBioscience	Cat#: 14-1171-82, RRID: AB_4338825
Anti-mouse Ly-6G (Clone: 1A8) – 141Pr		Fluidigm	Cat#: 3141008B, RRID: AB_2751702
Anti-mouse CD11c (Clone: N418) – 142Nd		Fluidigm	Cat#: 3142003B, RRID: AB_2431705
Anti-mouse CD16/32 (Clone: 93) – Purified		eBioscience	Cat#: 149502, RRID: AB_4316711
Anti-mouse CD16.2 (Clone: 9E9) – Purified		Biolegend	Cat#: 552125, RRID: AB_B279590
Anti-mouse CD4 (Clone: RM4-5) – 145Nd		Fluidigm	Cat#: 552125, RRID: AB_7264727
Anti-mouse F4/80 (Clone: BM8) – 146Nd		Fluidigm	Cat#: 3146008B, RRID: AB_1901904
Anti-mouse CD45 (Clone: 30-F11) – 147Sm		Fluidigm	Cat#: 3147003B, RRID: AB_0232001
Anti-mouse CD11b (Clone: M1/70) – 148Nd		Fluidigm	Cat#: 3148003B, RRID: AB_1401907
Anti-mouse CD19 (Clone: 6D5) – 149Sm		Fluidigm	Cat#: 3149002B, RRID: AB_0581828
Anti-mouse CD86 (Clone: GL-1) – Purified		Biolegend	Cat#: 105002, RRID: AB_B248667
Anti-mouse Ki67 (Clone: B56) – Purified		BD	Cat#: 556003, RRID: AB_6251774
Anti-mouse PD-L1 (Clone: 10.F9) – 153Eu		Fluidigm	Cat#: 3153016B, RRID: AB_1001813
Anti-mouse NKp46 (Clone: 29A1.4) – Purified		eBioscience	Cat#: 16-3351-81, RRID: AB_4293031
Anti-mouse CX3CR1 (Clone: SA011F11) – Purified		Biolegend	Cat#: 149002, RRID: AB_B215935
Anti-mouse EOMES (Clone: Dan11Mags) – Purified		eBioscience	Cat#: 14-4875-82, RRID: AB_2009821
Anti-mouse Foxp3 (Clone: FJK-16s) – 158Gd		Fluidigm	Cat#: 3158003A, RRID: AB_2421903
Anti-mouse PD-1 (Clone: P84) – 159Tb		Fluidigm	Cat#: 3159024B, RRID: AB_3391810
Anti-mouse SIRPa (Clone: E50-2440) – Purified		eBioscience	Cat#: 16-1721-81, RRID: AB_4301691
Anti-mouse Tbet (Clone: 4B10) – 161Dy		Fluidigm	Cat#: 3161014B, RRID: AB_3181901
Anti-mouse Ly6C (Clone: HK1.4) – 162Dy		Fluidigm	Cat#: 3162014B, RRID: AB_1201817
Anti-mouse PDCA-1 (Clone: 120G8.04) – Purified		Novus Biologicals	Cat#: DDX0390P-100, RRID: AB_DDX0390-091
Anti-mouse CD205 (Clone: NLDC-145) – Purified		Biolegend	Cat#: 138202, RRID: AB_B251007
Anti-mouse CD3e (Clone: 145-2C11) – 165Ho		Fluidigm	Cat#: 3165020B, RRID: AB_0411603
Anti-mouse CD25 (Clone: 3C7) – Purified		eBioscience	Cat#: 16-0253-85, RRID: AB_1980190
Anti-mouse CD62L (Clone: MEL-14) – Purified		eBioscience	Cat#: 16-0621-86, RRID: AB_E06479-1631
Anti-mouse CD8a (Clone: 53-6.7) – 168Er		Fluidigm	Cat#: 3168003B, RRID: AB_3451807
Anti-mouse CXCR3 (Clone: CXCR3-173) – Purified		eBioscience	Cat#: 16-1831-81, RRID: AB_4271882
Anti-mouse DCIR2 (Clone: 33D1) – Purified		eBioscience	Cat#: 14-5884-82, RRID: AB_4311699
Anti-mouse CD44 (Clone: IM7) – 171Yb		Fluidigm	Cat#: 3171003B, RRID: AB_1931725
Anti-mouse CD64 (Clone: X54-5/7.1) – Purified		Biolegend	Cat#: 139302, RRID: AB_B233202
Anti-mouse CD206 (Clone: C068C2) – Purified		Biolegend	Cat#: 141702, RRID: AB_B280548
Anti-mouse CD103 (Clone: 2E7) – Purified		eBioscience	Cat#: 14-1031-82, RRID: AB_4318103
Anti-mouse KLRG1 (Clone: 2F1) – Purified		eBioscience	Cat#: 16-5893-82, RRID: AB_4322612
Anti-mouse ICOS (Clone: 7E.17G9) – 176Yb		Fluidigm	Cat#: 3176014B, RRID: AB_1401909
Anti-mouse MHC-II (Clone: M5/114.15.2) – 209Bi		Fluidigm	Cat#: 3209006B, RRID: AB_3221903
